# Supplementary material for: MetalProGNet: a structure-based deep graph model for metalloprotein–ligand interaction predictions
Source: Royal Society of Chemistry journal article supplement (doi:10.1039/d2sc06576b), 2023-01-01
Supplement: d2sc06576b2.xlsx [file d2sc06576b2.xlsx]

## Sheet: Sheet1
PDB code	Subset	Complex Type	Resolution	Affinity Data	Affinity Type	pKd pKi pIC50	Release Year	Protein Name	Ligand Name	UniProt AC	Formula	Molecular Weight	Exact Mass	No. of atoms	No. of bonds	Polar Surface Area	XLOGP3	open banel LogP	HB donor	HB acceptor	Rotatable bonds	Canonical SMILES	metal_flag	pocket_formula	group	metal_atom_type
1a42	general	Protein-Ligand	2.25	Kd=0.13nM	Kd	9.89	1999	carbonic anhydrase ii	BZU	P00918	C12H22N3O5S3	384.515	384.072	45	46	168.38	-0.25	1.86	2	4	7	CC[NH2+][C@H]1CN(CCOCC)S(=O)(=O)c2c1cc(s2)S(=O)(=O)N	1	C347H101N87O78SZn+6	train	Zn
1a4m	general	Protein-Ligand	1.95	Ki~0.1pM	Ki	13	1998	adenosine deaminase	PRH	P03958	C10H12N4O5	268.226	268.081	31	33	133.49	-2.15	-2.27	4	5	5	OC[C@H]1O[C@H]([C@@H]([C@@H]1O)O)n1cnc2c1nc[nH]c2=O	1	C315H113N81O85S5Zn+7	train	Zn
1a4q	general	Protein-Ligand	1.9	IC50=3.6uM	IC50	5.44	1999	neuraminidase	DPC	P27907	C20H28N3O5	390.453	390.203	56	57	123.58	0.12	0.34	2	4	9	CCCN(C(=O)[C@@H]1OC(=C[C@@H]([C@H]1NC(=O)C)[NH3+])C(=O)O)CCc1ccccc1	1	C295H126CaN103O100S3+12	train	Ca
1a7t	general	Protein-Ligand	1.85	Ki=23mM	Ki	1.64	1998	metallo-beta-lactamase	MES	P25910	C6H14NO4S	196.245	196.064	26	26	76.42	-3.5	0.44	2	3	4	OS(=O)(=O)CC[NH+]1CCOCC1	1	C178H65N55O58S4Zn2+4	valid	Zn
1a85	general	Protein-Ligand	2	IC50=30uM	IC50	4.52	1999	matrix metalloproteinase 8	0DY	P22894	C18H27N5O5	393.437	393.201	55	55	176.64	-0.74	1.87	6	5	14	ONC(=O)[C@H](C(=O)N[C@H](C(=O)NCc1cccc(c1)N)CC(=O)N)CC(C)C	1	C233H65CaN61O59SZn+5	train	ZnCa
1a86	general	Protein-Ligand	2	IC50=101uM	IC50	4	1999	matrix metalloproteinase 8	0ZB	P22894	C18H25N3O6	379.408	379.174	52	52	144.83	2.03	1.6	4	6	13	ONC(=O)[C@H](C(=O)N[C@H](C(=O)NCc1ccccc1)CC(=O)O)CC(C)C	1	C274H83CaN68O72SZn+5	train	ZnCa
1a8t	general	Protein-Ligand	2.55	Ki=1.6uM	Ki	5.8	1998	metallo-beta-lactamase	061	P25910	C26H24N6O2	452.508	452.196	58	62	109.58	4.3	4.34	2	5	8	CCCCc1nc2ccc(cc2c(=O)n1Cc1ccc(cc1)c1ccccc1c1nnn[nH]1)O	1	C252H84N72O74S4Zn2+5	valid	Zn
1add	refined	Protein-Ligand	2.4	Ki=0.18uM	Ki	6.74	1994	adenosine deaminase	1DA	P03958	C11H14N4O4	266.253	266.102	33	35	126.65	-1.59	-0.79	4	5	5	OC[C@H]1O[C@H]([C@@H]([C@@H]1O)O)n1cnc2c1nccc2N	1	C315H114N81O85S5Zn+8	valid	Zn
1af2	general	Protein-Ligand	2.3	Ki=0.8mM	Ki	3.1	1997	cytidine deaminase	__U	P0ABF6	C9H12N2O6	244.201	244.07	29	30	124.78	-2.3	-2.85	4	5	5	OC[C@H]1O[C@H]([C@@H]([C@@H]1O)O)n1ccc(=O)[nH]c1=O	1	C273H94N76O82S5Zn+3	test	Zn
1ag9	general	Protein-Ligand	1.8	Kd=1nM	Kd	9	1997	flavodoxin	FMN	P61949	C17H24N4O9P	459.368	459.128	55	57	230.64	-2.43	-1.57	6	8	9	O=c1[nH]c(=O)c2c([nH]1)n(C[C@@H]([C@@H]([C@@H](COP(O)(O)O)O)O)O)c1c([nH]2)cc(c(c1)C)C	1	C300H96CaN71O99S4+2	train	Ca
1ao0	general	Protein-Ligand	2.8	Kd=11.0uM	Kd	4.96	1997	glutamine phosphoribosylpyrophosphate	ADP	P00497	C10H17N5O10P2	429.217	429.045	44	46	266.1	-4.89	-2.04	3	10	7	O[C@@H]1[C@@H](COP(OP(O)(O)O)(O)O)O[C@H]([C@@H]1O)n1cnc2c1ncnc2N	1	C314H117MgN88O91S2+10	train	Mg
1atl	refined	Protein-Ligand	1.8	Ki=0.52uM	Ki	6.28	1995	atrolysin c	SLE-TYR	P15167	C17H25NO4S	339.45	339.15	48	48	114.43	3.93	2.79	1	3	10	SC[C@H](C(=O)N[C@H](C(=O)O)Cc1ccc(cc1)OC)CC(C)C	1	C222H73N60O64S5Zn+7	test	Zn
1avn	refined	Protein-Ligand	2	Kd=0.125mM	Kd	3.9	1997	carbonic anhydrase ii	HSM	P00918	C5H10N3	112.153	112.087	18	18	56.32	-0.58	-0.81	2	1	2	C(c1cnc[nH]1)C[NH3+]	1	C194H68N47O41Zn+4	train	Zn
1ax0	refined	Protein-Ligand	1.9	Kd=0.746mM	Kd	3.13	1998	lectin	A2G	P16404	C8H15NO6	221.208	221.09	30	30	119.25	-2.59	-2.69	5	5	7	OC[C@H]1O[C@H](O)[C@@H]([C@H]([C@H]1O)O)NC(=O)C	1	C170H56CaN46O58+	train	Ca
1ax1	general	Protein-Ligand	1.95	Kd=0.515mM	Kd	3.29	1998	lectin	GLC-GAL	P16404	C12H22O11	342.296	342.116	45	46	189.53	-4.73	-5.4	8	8	12	OC[C@H]1O[C@@H](O)[C@@H]([C@H]([C@@H]1O[C@@H]1O[C@H](CO)[C@@H]([C@@H]([C@H]1O)O)O)O)O	1	C160H51CaN43O51+2	valid	Ca
1ax2	general	Protein-Ligand	1.95	Kd=0.103mM	Kd	3.99	1998	lectin	NAG-GAL	P16404	C14H25NO11	383.348	383.143	51	52	198.4	-4.74	-4.86	8	8	13	OC[C@H]1O[C@H](O)[C@@H]([C@H]([C@@H]1O[C@@H]1O[C@H](CO)[C@@H]([C@@H]([C@H]1O)O)O)O)NC(=O)C	1	C166H54CaN46O52+2	train	Ca
1axz	general	Protein-Ligand	1.95	Kd=0.637mM	Kd	3.2	1998	lectin	GAL	P16404	C6H12O6	180.156	180.063	24	24	110.38	-2.59	-3.22	5	5	6	OC[C@H]1O[C@@H](O)[C@@H]([C@H]([C@H]1O)O)O	1	C160H51CaN43O51+2	valid	Ca
1azm	refined	Protein-Ligand	2	Ki=0.8uM	Ki	6.1	1994	human carbonic anhydrase I enzyme (HCAI)	AZM	P00915	C4H6N4O3S2	222.245	221.988	19	19	151.66	-1.23	1	2	5	3	CC(=O)Nc1nnc(s1)S(=O)(=O)N	1	C289H96N75O67Zn+6	train	Zn
1b38	refined	Protein-Ligand	2	Kd=0.254uM	Kd	6.6	1998	cyclin dependent kinase 2	ATP	P24941	C10H19N5O13P3	510.205	510.019	50	52	329.38	-6.07	-2.36	3	12	9	O[C@@H]1[C@@H](COP(OP(OP(O)(O)O)(O)O)(O)O)O[C@H]([C@@H]1O)n1cnc2c1ncnc2N	1	C359H98MgN87O90+10	train	Mg
1b39	general	Protein-Ligand	2.1	Kd=0.120uM	Kd	6.92	1998	cyclin dependent kinase 2	ATP	P24941	C10H19N5O13P3	510.205	510.019	50	52	329.38	-6.07	-2.36	3	12	9	O[C@@H]1[C@@H](COP(OP(OP(O)(O)O)(O)O)(O)O)O[C@H]([C@@H]1O)n1cnc2c1ncnc2N	1	C358H97MgN85O89+11	train	Mg
1b57	refined	Protein-Ligand	2	Ki=0.01uM	Ki	8	2000	Escherichia coli class II fructose-1, 6-bisphosphate aldolase	PGH	P0AB71	C2H7NO6P	172.054	172.001	17	16	132.84	-2.86	-1.45	2	5	4	ONC(=O)COP(O)(O)O	1	C246H97N75NaO83S2Zn+7	train	ZnNa
1b8y	refined	Protein-Ligand	2	Ki=14nM	Ki	7.85	1999	stromelysin-1	IN7	P08254	C19H22N2O4S	374.454	374.13	48	50	95.09	3.73	3.97	1	4	5	OC(=O)CNS(=O)(=O)c1ccc(cc1)N1CCC(CC1)c1ccccc1	1	C305H98CaN79O81SZn+7	train	ZnCa
1b9v	general	Protein-Ligand	2.35	IC50=224uM	IC50	3.65	1999	neuraminidase	RA2	P03474	C18H26N2O5	350.409	350.184	51	52	110.1	2.31	1.97	3	5	9	CCC(Nc1cc(ccc1N1C(=O)CCC1(CO)CO)C(=O)O)CC	1	C296H126CaN99O98S2+12	valid	Ca
1bcd	refined	Protein-Ligand	1.9	Ki=2nM	Ki	8.7	1993	carbonic anhydrase ii	FMS	P00918	CH2F3NO2S	149.092	148.976	10	9	68.54	0.14	1.58	1	2	0	FC(S(=O)(=O)N)(F)F	1	C244H87N64O55SZn+5	train	Zn
1bcj	general	Protein-Ligand	2.1	Kd=0.20mM	Kd	3.7	1998	mannose-binding protein-a	NGA	P19999	C8H15NO6	221.208	221.09	30	30	119.25	-2.59	-2.69	5	5	7	OC[C@H]1O[C@@H](O)[C@@H]([C@H]([C@H]1O)O)NC(=O)C	1	C158H58CaN45O46S+4	valid	Ca
1biw	general	Protein-Ligand	2.5	IC50=104nM	IC50	6.98	1999	stromelysin-1	S80	P08254	C20H37N3O6	415.524	415.268	66	66	128.2	0.28	1.41	4	5	16	COCCN1CCCC[C@@H](C1=O)NC(=O)[C@@H]([C@@H](C(=O)NO)CCCO)CC(C)C	1	C250H74CaN60O61SZn+5	train	ZnCa
1bji	general	Protein-Ligand	2	IC50=2nM	IC50	8.7	1998	neuraminidase	DPC	P03472	C20H28N3O5	390.453	390.203	56	57	123.58	0.12	0.34	2	4	9	CCCN(C(=O)[C@@H]1OC(=C[C@@H]([C@H]1NC(=O)C)[NH3+])C(=O)O)CCc1ccccc1	1	C289H121CaN101O99S2+9	train	Ca
1bm6	general	Protein-Ligand	NMR	Ki=13nM	Ki	7.89	1999	stromelysin-1	3-mer	P08254	C18H23N3O5S	393.457	393.136	50	51	117.21	1.69	3.28	2	5	10	ONC(=O)[C@H](N(S(=O)(=O)c1ccc(cc1)OC)Cc1cccnc1)C(C)C	1	C186H68CaN49O48SZn+6	test	ZnCa
1bn1	refined	Protein-Ligand	2.1	Kd=0.46nM	Kd	9.34	1999	carbonic anhydrase ii	AL5	P00918	C12H14N2O4S3	346.446	346.012	35	36	151.33	1.66	4.44	2	4	5	Cc1ccc(cc1)CNS(=O)(=O)c1ccc(s1)S(=O)(=O)N	1	C331H102N83O75Zn+5	train	Zn
1bn3	refined	Protein-Ligand	2.2	Kd=0.13nM	Kd	9.89	1999	carbonic anhydrase ii	AL6	P00918	C13H12N2O5S3	372.44	371.991	35	37	151.77	1.65	4.51	1	4	3	COc1cccc(c1)N1C=Cc2c(S1(=O)=O)sc(c2)S(=O)(=O)N	1	C301H93N78O71SZn+5	train	Zn
1bn4	refined	Protein-Ligand	2.1	Kd=0.49nM	Kd	9.31	1999	carbonic anhydrase ii	AL9	P00918	C12H14N2O5S3	362.445	362.006	36	37	160.56	1.26	4.14	2	4	6	COc1ccc(cc1)CNS(=O)(=O)c1ccc(s1)S(=O)(=O)N	1	C333H102N86O76Zn+6	train	Zn
1bnm	general	Protein-Ligand	2.6	Kd=0.10nM	Kd	10	1999	carbonic anhydrase	AL8	P00918	C14H18N3O5S3	404.505	404.041	43	45	168.38	0.69	2.77	2	4	4	C[NH2+][C@H]1CN(c2cccc(c2)OC)S(=O)(=O)c2c1cc(s2)S(=O)(=O)N	1	C350H104N92O82SZn+7	test	Zn
1bnn	refined	Protein-Ligand	2.3	Kd=0.10nM	Kd	10	1999	carbonic anhydrase ii	AL1	P00918	C13H14N2O5S3	374.456	374.006	37	39	151.77	1.55	4.08	1	4	3	COc1cccc(c1)N1CCc2c(S1(=O)=O)sc(c2)S(=O)(=O)N	1	C301H96HgN77O73SZn+4	train	Zn
1bnq	refined	Protein-Ligand	2.4	Kd=0.32nM	Kd	9.49	1999	carbonic anhydrase ii	AL4	P00918	C11H20N3O5S3	370.489	370.057	42	43	168.38	-0.62	1.47	2	4	6	COCCN1C[C@H]([NH2+]CC)c2c(S1(=O)=O)sc(c2)S(=O)(=O)N	1	C359H104N89O77S2Zn+6	train	Zn
1bnt	refined	Protein-Ligand	2.15	Kd=0.16nM	Kd	9.8	1999	carbonic anhydrase ii	AL2	P00918	C13H14N2O6S3	390.455	390.001	38	40	172	0.43	3.57	2	5	4	COc1ccc(cc1)N1C[C@H](O)c2c(S1(=O)=O)sc(c2)S(=O)(=O)N	1	C349H102N88O77S2Zn+6	test	Zn
1bnu	refined	Protein-Ligand	2.15	Kd=0.20nM	Kd	9.7	1999	carbonic anhydrase ii	AL3	P00918	C11H12N2O5S4	380.483	379.963	34	36	191.01	0.12	3.49	2	5	4	O[C@H]1CN(Cc2cccs2)S(=O)(=O)c2c1cc(s2)S(=O)(=O)N	1	C312H94N80O70SZn+6	train	Zn
1bnv	refined	Protein-Ligand	2.4	Kd=1.70nM	Kd	8.77	1999	carbonic anhydrase ii	AL7	P00918	C14H18N3O5S3	404.505	404.041	43	45	168.38	0.69	2.77	2	4	4	C[NH2+][C@@H]1CN(c2cccc(c2)OC)S(=O)(=O)c2c1cc(s2)S(=O)(=O)N	1	C335H104N84O71S2Zn+7	train	Zn
1bnw	refined	Protein-Ligand	2.25	Kd=0.83nM	Kd	9.08	1999	carbonic anhydrase ii	TPD	P00918	C9H10N2O4S4	338.447	337.952	29	30	179.57	1.01	4.19	2	4	5	O=S(=O)(c1ccc(s1)S(=O)(=O)N)NCc1cccs1	1	C296H93HgN76O70SZn+5	train	Zn
1bqo	general	Protein-Ligand	2.3	IC50=18.4nM	IC50	7.74	1999	stromelysin-1	N25	P08254	C21H27N3O8S2	513.584	513.124	61	63	159.31	1.81	3.69	2	6	9	ONC(=O)C1N(CC(CN1S(=O)(=O)c1ccc(cc1)OC)(C)C)S(=O)(=O)c1ccc(cc1)OC	1	C315H94CaN77O77SZn+5	train	ZnCa
1bsk	general	Protein-Ligand	3	Ki=76uM	Ki	4.12	2000	peptide deformylase	MLN	P0A6K3	C18H29N3O8P	446.412	446.169	59	59	187.53	1.91	3.28	2	7	12	CCCC[C@@H](C(=O)N[C@H](C(=O)Nc1ccc(cc1)N(=O)=O)CC(C)C)OP(O)(O)O	1	C273H98N74O79S5Zn+6	train	Zn
1bug	general	Protein-Ligand	2.7	IC50=43uM	IC50	4.37	1999	catechol oxidase	URS	Q9ZP19	C7H8N2S	152.217	152.041	18	18	70.14	1.13	2.12	2	0	2	NC(=S)Nc1ccccc1	1	C210H76Cu2N64O54S2+8	test	XX
1bxr	refined	Protein-Ligand	2.1	Ki=0.4mM	Ki	3.4	1999	carbamoyl-phosphate synthase	ANP	P00968 P0A6F1	C10H20N6O12P3	509.22	509.035	51	53	332.18	-6.35	-2.4	4	12	9	O[C@@H]1[C@@H](COP(OP(NP(O)(O)O)(O)O)(O)O)O[C@H]([C@@H]1O)n1cnc2c1ncnc2N	1	C424H147MnN116O135S6+7	train	Mn
1bzs	general	Protein-Ligand	1.7	IC50=10nM	IC50	8	2000	neutrophil collagenase (mmp8)	BSI	P22894	C22H19NO4S	393.456	393.103	47	50	83.06	4.74	4.57	0	4	3	OC(=O)[C@H]1Cc2ccccc2CN1S(=O)(=O)c1ccc(cc1)c1ccccc1	1	C284H90CaN70O76SZn+5	valid	ZnCa
1bzy	refined	Protein-Ligand	2	Kd=4.6nM	Kd	8.34	1999	hypoxanthine-guanine phosphoribosyltransferase	IMU	P00492	C11H18N5O7P	363.264	363.094	42	44	228.14	-6.97	-1.64	6	6	5	O[C@H]1[C@@H]([NH2+][C@@H]([C@H]1O)COP(O)(O)O)c1c[nH]c2c1nc(N)[nH]c2=O	1	C331H104Mg2N83O96S3+9	train	Mg
1c1r	refined	Protein-Ligand	1.37	Ki=0.0235uM	Ki	7.63	2000	trypsin beta	BAI	P00760	C16H15N6	291.331	291.136	37	40	108.97	3.83	1.19	2	2	3	NC(=[NH2+])c1ccc2c(c1)[nH]c(n2)Cc1nc2c([nH]1)cccc2	1	C262H95N66O76S5Zn+5	train	Zn
1c1u	refined	Protein-Ligand	1.75	Ki=0.0056uM	Ki	8.25	2000	thrombin alpha	BAI	P28504 P00734	C16H15N6	291.331	291.136	37	40	108.97	3.83	1.19	2	2	3	NC(=[NH2+])c1ccc2c(c1)[nH]c(n2)Cc1nc2c([nH]1)cccc2	1	C264H94N68O77S5Zn+6	train	Zn
1c1v	refined	Protein-Ligand	1.98	Ki=0.023uM	Ki	7.64	2000	thrombin alpha	BAB	P28504 P00734	C17H18N8	334.378	334.165	43	46	160.58	4.62	-0.64	2	2	4	NC(=[NH2+])c1ccc2c(c1)[nH]c(n2)Cc1nc2c([nH]1)cc(cc2)C(=[NH2+])N	1	C279H103N70O80S5Zn2+6	train	Zn
1c3i	general	Protein-Ligand	1.83	IC50=1.6uM	IC50	5.8	2000	stromelysin-1	TR1	P08254	C24H32N3O4S	458.594	458.211	64	65	139.91	3.22	1.93	3	3	15	SC[C@@H](C(=O)NCC(=O)N[C@H](C(=O)OC)C(C)C)[NH2+]Cc1ccc(cc1)c1ccccc1	1	C361H117CaN91O100SZn2+8	valid	ZnCa
1c3r	general	Protein-Ligand	2	IC50=0.4uM	IC50	6.4	1999	histone deacetylase-like protein (hdlp)	TSN	O67135	C17H22N2O3	302.368	302.163	44	44	69.64	2.75	2.97	2	3	8	ONC(=O)/C=C/C(=C/[C@H](C(=O)c1ccc(cc1)N(C)C)C)/C	1	C312H99N79O88S3Zn+4	train	Zn
1caq	general	Protein-Ligand	1.8	Ki=19nM	Ki	7.72	1999	stromelysin-1	DPS	P08254	C28H29N3O4S	503.613	503.188	65	69	110.88	5.84	6.06	2	4	7	OC(=O)[C@@H](NS(=O)(=O)c1ccc(cc1)N1CC[C@H](CC1)c1ccccc1)Cc1c[nH]c2c1cccc2	1	C365H113N89O95SZn2+7	test	Zn
1cbx	refined	Protein-Ligand	2	Ki=0.45uM	Ki	6.35	1994	carboxypeptidase a	BZS	P00730	C11H12O4	208.211	208.074	27	27	74.6	3.86	1.4	0	4	3	OC(=O)[C@H](Cc1ccccc1)CC(=O)O	1	C302H93N75O86Zn+3	train	Zn
1cgl	refined	Protein-Ligand	2.4	Ki=0.135uM	Ki	6.87	1995	adenosine deaminase	0ED	P03956	C33H49N5O7	627.771	627.363	94	96	164.11	1.67	2.23	5	5	21	CC(C[C@@H](C(=O)N[C@H](C(=O)NCC[NH+]1CCOCC1)Cc1ccccc1)[NH2+][C@@H](C(=O)O)CCNC(=O)OCc1ccccc1)C	1	C296H96CaN78O82SZn2+7	train	ZnCa
1ch8	general	Protein-Ligand	2.5	Ki=0.1uM	Ki	7	1999	adenylosuccinate synthetase	GPX	P0A7D4	C10H17N5O13P3	508.189	508.004	48	51	318.12	-5.9	-2.02	2	9	5	Nc1[nH]c(=O)c2c(n1)n(cn2)[C@@H]1O[C@@H]([C@@H]2[C@H]1OP(O2)(O)O)COP(OP(O)(O)O)(O)O	1	C344H123MgN97O106S3+10	valid	Mg
1cil	general	Protein-Ligand	1.6	Ki=0.37nM	Ki	9.43	1994	carbonic anhydrase ii	ETS	P00918	C10H17N2O4S3	325.448	325.035	36	37	155.91	0.41	2.45	2	4	3	CC[NH2+][C@H]1C[C@H](C)S(=O)(=O)c2c1cc(s2)S(=O)(=O)N	1	C308H96N73O64S2Zn+4	train	Zn
1cim	general	Protein-Ligand	2.1	Ki=1.52nM	Ki	8.82	1994	carbonic anhydrase ii	PTS	P00918	C8H13N2O4S3	297.395	297.004	30	31	166.94	-0.47	2.11	2	4	1	C[C@H]1C[C@H]([NH3+])c2c(S1(=O)=O)sc(c2)S(=O)(=O)N	1	C263H91N64O56Zn+5	valid	Zn
1cin	general	Protein-Ligand	2.1	Ki=1.88nM	Ki	8.73	1994	carbonic anhydrase ii	MTS	P00918	C9H15N2O4S3	311.421	311.019	33	34	155.91	0.04	2.06	2	4	2	C[NH2+][C@H]1C[C@H](C)S(=O)(=O)c2c1cc(s2)S(=O)(=O)N	1	C272H91N70O58SZn+5	train	Zn
1ciz	refined	Protein-Ligand	1.64	Ki=36nM	Ki	7.44	1999	stromelysin-1	DPS	P08254	C28H29N3O4S	503.613	503.188	65	69	110.88	5.84	6.06	2	4	7	OC(=O)[C@H](NS(=O)(=O)c1ccc(cc1)N1CC[C@H](CC1)c1ccccc1)Cc1c[nH]c2c1cccc2	1	C354H108N87O94SZn2+7	valid	Zn
1clu	general	Protein-Ligand	1.7	Kd=5.4nM	Kd	8.27	1999	transforming protein p21/h-ras-1	DBG	P01112	C11H23N7O12P3	538.261	538.062	56	58	343.95	-6.84	-2.49	6	10	11	CNP(NP(OP(OC[C@H]1O[C@H]([C@@H]([C@@H]1O)O)n1cnc2c1nc(N)[nH]c2=O)(O)O)(O)O)(O)O	1	C197H73MgN57O68S+5	valid	Mg
1cnw	refined	Protein-Ligand	2	Kd=19nM	Kd	7.72	1995	carbonic anhydrase ii	EG1	P00918	C15H25N4O6S	389.447	389.149	51	51	172.84	-2.13	0.02	4	4	14	[NH3+]CC(=O)NCCOCCOCCNC(=O)c1ccc(cc1)S(=O)(=O)N	1	C335H103N84O73SZn+7	valid	Zn
1cnx	refined	Protein-Ligand	1.9	Kd=43nM	Kd	7.37	1995	carbonic anhydrase ii	EG2	P00918	C13H22N3O5S	332.396	332.128	44	44	143.74	-1.47	0.51	3	3	11	[NH3+]CCOCCOCCNC(=O)c1ccc(cc1)S(=O)(=O)N	1	C370H116N97O93SZn+7	test	Zn
1cny	refined	Protein-Ligand	2.3	Kd=14nM	Kd	7.85	1995	carbonic anhydrase ii	EG3	P00918	C22H31N4O6S	479.57	479.196	64	65	172.84	-0.14	1.63	4	4	16	[NH3+][C@H](C(=O)NCCOCCOCCNC(=O)c1ccc(cc1)S(=O)(=O)N)Cc1ccccc1	1	C351H102HgN91O80SZn+6	test	Zn
1cp6	general	Protein-Ligand	1.9	Ki=10uM	Ki	5	1999	aminopeptidase	BUB	Q01693	C3H9BO2	87.913	88.07	15	14	40.46	0.42	-0.13	2	2	4	CCCB(O)O	1	C187H78N47O69S4Zn2+2	train	Zn
1cps	refined	Protein-Ligand	2.25	Ki=0.22uM	Ki	6.66	1993	carboxypeptidase a	CPM	P00730	C11H16N2O2S	240.322	240.093	32	32	93.38	4.86	3.09	0	2	4	OC(=O)[C@@H](CS(=N)(=N)C)Cc1ccccc1	1	C249H93N70O78Zn+4	train	Zn
1cs4	general	Protein-Ligand	2.5	IC50=2.7uM	IC50	5.57	2001	adenylate cyclase, type v	101	P04896 P26769 P30803	C10H15N5O6P	332.23	332.076	37	39	182.59	-2.74	-0.69	2	7	4	OC[C@H]1O[C@H](C[C@@H]1OP(O)(O)O)n1cnc2c1ncnc2N	1	C297H107MgN72O84S3+6	train	Mg
1ctt	refined	Protein-Ligand	2.2	Ki=30uM	Ki	4.52	1995	cytidine deaminase	DHZ	P0ABF6	C9H14N2O5	230.218	230.09	30	31	102.26	-1.96	-1.77	4	4	5	OC[C@H]1O[C@H]([C@@H]([C@@H]1O)O)N1C=CCNC1=O	1	C273H96N76O82S5Zn+3	train	Zn
1ctu	refined	Protein-Ligand	2.3	Ki=1.2pM	Ki	11.92	1995	cytidine deaminase	ZEB	P0ABF6	C9H14N2O6	246.217	246.085	31	32	122.49	-2.51	-2.45	5	5	6	OC[C@H]1O[C@H]([C@@H]([C@@H]1O)O)N1C=C[C@H](NC1=O)O	1	C275H91N76O84S5Zn+3	test	Zn
1d2e	refined	Protein-Ligand	1.94	Kd=1uM	Kd	6	1999	elongation factor tu (ef-tu)	GDP	P49410	C10H17N5O11P2	445.216	445.04	45	47	286.07	-5.72	-2.75	4	9	7	O[C@@H]1[C@@H](COP(OP(O)(O)O)(O)O)O[C@H]([C@@H]1O)n1cnc2c1nc(N)[nH]c2=O	1	C225H88MgN65O76S2+5	test	Mg
1d2s	general	Protein-Ligand	1.55	Kd=0.182nM	Kd	9.74	2000	N-terminal laminin G-like domain of human sex hormone-binding globulin	DHT	P04278	C19H30O2	290.44	290.225	51	54	37.3	3.77	3.96	1	2	1	O=C1CC[C@]2([C@H](C1)CC[C@@H]1[C@@H]2CC[C@]2([C@H]1CC[C@@H]2O)C)C	1	C327H101CaN78O87S3+7	train	Ca
1d3v	general	Protein-Ligand	1.7	Kd=0.11uM	Kd	6.96	1999	arginase	ABH	P07824	C6H16BNO5	193.006	193.112	29	28	125.63	-2.59	-2.23	4	5	8	OC(=O)[C@H](CCCC[B](O)(O)O)[NH3+]	1	C239H82Mn2N72O84S2+3	train	Mn
1d5j	general	Protein-Ligand	2.6	IC50=0.7nM	IC50	9.15	2000	stromelysin-1	MM3	P08254	C15H22N2O5S2	374.476	374.097	46	47	129.62	1.33	2.89	2	4	6	ONC(=O)[C@H]1N(CCCSC1(C)C)S(=O)(=O)c1ccc(cc1)OC	1	C247H77CaN58O56SZn+5	train	ZnCa
1d6n	general	Protein-Ligand	2.7	Ki=31.5uM	Ki	4.5	1999	hypoxanthine-guanine phosphoribosyltransferase	PPO	P00492	C5H4N4O	136.111	136.039	14	15	70.47	-0.7	-0.76	1	1	0	O=c1[nH]cnc2c1N=NC2	1	C176H66MgN45O56S2+3	train	Mg
1d7x	general	Protein-Ligand	2	IC50=3nM	IC50	8.52	2000	stromelysin-1 precursor	SPC	P08254	C13H17N3O6S	343.356	343.084	40	41	125.91	0.07	1.38	2	4	7	CO/N=C/1\C[C@@H](N(C1)S(=O)(=O)c1ccc(cc1)OC)C(=O)NO	1	C329H112CaN80O95SZn+5	train	ZnCa
1d8f	general	Protein-Ligand	2.4	IC50=18nM	IC50	7.74	2000	stromelysin-1 precursor	SPI	P08254	C20H23N3O7S	449.478	449.126	54	56	133.86	1.1	2.56	2	5	10	ONC(=O)[C@H]1CN(CCN1S(=O)(=O)c1ccc(cc1)OC)C(=O)OCc1ccccc1	1	C314H96CaN73O81SZn+5	train	ZnCa
1d8m	general	Protein-Ligand	2.44	IC50=3.1nM	IC50	8.51	2000	stromelysin-1 precursor	BBH	P08254	C19H21N3O6S	419.452	419.115	50	52	124.63	0.73	2.3	2	5	8	ONC(=O)[C@H]1CC(=O)N(CN1S(=O)(=O)c1ccc(cc1)OC)Cc1ccccc1	1	C287H91CaN66O72SZn+4	valid	ZnCa
1db4	general	Protein-Ligand	2.2	IC50=0.057uM	IC50	7.24	1999	human non-pancreatic secretory phospholipase A2	8IN	P14555	C21H26N2O5P	417.415	417.158	55	57	131.53	1.15	3.23	1	4	8	NC(=O)Cc1c(C)n(c2c1cc(OCCCP(O)(O)O)cc2)Cc1ccccc1	1	C280H89CaN79O78S10+10	train	Ca
1db5	general	Protein-Ligand	2.8	IC50=0.152uM	IC50	6.82	1999	human non-pancreatic secretory phospholipase A2	6IN	P14555	C22H24N2O4	380.437	380.174	52	54	94.55	4.08	3.97	1	3	8	NC(=O)Cc1c(C)n(c2c1cc(OCCCC(=O)O)cc2)Cc1ccccc1	1	C276H94CaN76O78S9+9	train	Ca
1dmt	general	Protein-Ligand	2.1	IC50=2nM	IC50	8.7	2000	human neutral endopeptidase (Neprilysin)	RDF	P08473	C23H35N3O10P	544.512	544.206	72	74	227.42	0.65	0.57	6	8	14	CC(C[C@@H](C(=O)N[C@H](C(=O)O)Cc1c[nH]c2c1cccc2)NP(O[C@@H]1O[C@@H](C)[C@@H]([C@H]([C@H]1O)O)O)(O)O)C	1	C378H123N100O104S2Zn+6	train	Zn
1dqn	refined	Protein-Ligand	1.75	Ki=10nM	Ki	8	2000	guanine phosphoribosyltransferase	IMU	Q24973	C11H18N5O7P	363.264	363.094	42	44	228.14	-6.97	-1.64	6	6	5	O[C@H]1[C@@H]([NH2+][C@@H]([C@H]1O)COP(O)(O)O)c1c[nH]c2c1nc(N)[nH]c2=O	1	C277H81Mg2N63O77S2+4	train	Mg
1dth	general	Protein-Ligand	2	IC50=6nM	IC50	8.22	1997	atrolysin c	BAT	P15167	C23H31N3O4S2	477.64	477.176	63	64	161.07	3.55	4.27	4	4	16	CNC(=O)[C@@H](NC(=O)[C@@H]([C@@H](C(=O)NO)CSc1cccs1)CC(C)C)Cc1ccccc1	1	C244H86N68O77S5Zn+7	train	Zn
1ebg	general	Protein-Ligand	2.1	Ki=15pM	Ki	10.82	1995	enolase	PAH	P00924	C2H7NO5P	156.054	156.006	16	15	123.61	-2.91	-1.38	2	5	3	ONC(=O)CP(O)(O)O	1	C200H100Mg2N65O79S3+6	train	Mg
1ec9	refined	Protein-Ligand	2	Ki=0.8mM	Ki	3.1	2000	glucarate dehydratase	XYH	P0AES2	C5H9NO7	195.127	195.038	22	21	147.32	-2.36	-2.95	5	7	8	ONC(=O)[C@H]([C@@H]([C@H](C(=O)O)O)O)O	1	C275H117MgN82O86S2+8	train	Mg
1ecq	refined	Protein-Ligand	2	Ki=1.0mM	Ki	3	2000	glucarate dehydratase	DXG	P0AES2	C6H10O7	194.139	194.043	23	22	135.29	-0.38	-2.37	3	7	6	OC(=O)[C@H](C[C@@H]([C@H](C(=O)O)O)O)O	1	C261H104MgN76O79S2+6	train	Mg
1els	general	Protein-Ligand	2.4	Ki=15pM	Ki	10.82	1994	enolase	PAH	P00924	C2H7NO5P	156.054	156.006	16	15	123.61	-2.91	-1.38	2	5	3	ONC(=O)CP(O)(O)O	1	C176H87Mn2N62O76S2+6	train	Mn
1eoc	refined	Protein-Ligand	2.25	Ki=0.9uM	Ki	6.05	2000	protocatechuate 3,4-dioxygenase alpha chain	4NC	P20371 P20372	C6H5NO4	155.108	155.022	16	16	86.28	1.04	1.53	2	4	2	O=N(=O)c1ccc(c(c1)O)O	1	C249H83FeN73O67S+7	train	Fe
1eou	general	Protein-Ligand	2.1	IC50=36nM	IC50	7.44	2002	carbonic anhydrase ii	SMS	P00918	C9H15NO10S2	361.346	361.014	37	39	166.44	-1.78	0.98	1	4	3	NS(=O)(=O)OC[C@]12OC[C@@H]3[C@H]([C@@H]2OC(O1)(C)C)OS(=O)(=O)O3	1	C300H92N72O62S2Zn+4	train	Zn
1eub	general	Protein-Ligand	NMR	Ki=1.9nM	Ki	8.72	2001	collagenase 3 (mmp-13)	3-mer	P45452	C18H23N3O5S	393.457	393.136	50	51	117.21	1.69	3.28	2	5	10	ONC(=O)[C@H](N(S(=O)(=O)c1ccc(cc1)OC)Cc1cccnc1)C(C)C	1	C250H86CaN64O65SZn+7	train	ZnCa
1ew8	refined	Protein-Ligand	2.2	Ki=5.5mM	Ki	2.26	2002	alkaline phosphatase	PAE	P00634	C2H6O5P	141.04	140.995	14	13	111.58	-1.28	-1.19	0	5	0	OC(=O)CP(O)(O)O	1	C185H83MgN60O73Zn2+5	test	ZnMg
1ew9	refined	Protein-Ligand	2	Ki=0.6mM	Ki	3.22	2002	alkaline phosphatase	MMQ	P00634	CH6O3PS	129.095	128.978	12	11	113.08	-1.38	-0.39	0	3	1	SCP(O)(O)O	1	C161H85MgN53O64Zn2+6	train	ZnMg
1f2o	general	Protein-Ligand	1.7	Ki=12.4mM	Ki	1.91	2001	aminopeptidase	LEU	P80561	C6H14NO2	132.181	132.102	23	22	64.94	-0.79	-0.27	1	2	2	[NH3+][C@H](C(=O)O)CC(C)C	1	C216H80N56O76SZn2+3	valid	Zn
1f2p	general	Protein-Ligand	1.8	Ki=12.7mM	Ki	1.9	2001	aminopeptidase	PHE	P80561	C9H12NO2	166.197	166.087	24	24	64.94	-0.53	-0.08	1	2	2	[NH3+][C@H](C(=O)O)Cc1ccccc1	1	C198H74N52O69SZn2+4	train	Zn
1f57	refined	Protein-Ligand	1.75	Ki=2.3uM	Ki	5.64	2000	carboxypeptidase a	DCY	P00730	C3H8NO2S	122.166	122.028	15	14	103.74	-2.19	-1.39	1	2	2	OC(=O)[C@H]([NH3+])CS	1	C168H72N51O52Zn+4	test	Zn
1ff1	general	Protein-Ligand	NMR	Kd=12uM	Kd	4.92	2000	epidermal growth factor receptor substrate 15(EH2 of Eps15)	11-mer	P42566	C31H48N7O10	678.754	678.346	96	97	285.2	-3.35	-1.65	8	10	24	OC[C@@H](C(=O)N[C@H](C(=O)N[C@H](C(=O)N1CCC[C@H]1C(=O)N[C@H](C(=O)N[C@H](C(=O)O)CC(C)C)Cc1ccccc1)CC(=O)N)[C@H](O)C)[NH3+]	1	C196H60CaN50O57S2+5	train	Ca
1fkw	refined	Protein-Ligand	2.4	Ki=9uM	Ki	5.05	1996	adenosine deaminase	PUR	P03958	C10H12N4O4	252.227	252.086	30	32	113.52	-1.56	-1.56	3	6	5	OC[C@H]1O[C@H]([C@@H]([C@@H]1O)O)n1cnc2c1ncnc2	1	C296H106N77O79S5Zn+8	valid	Zn
1fls	general	Protein-Ligand	NMR	IC50=33nM	IC50	7.48	2001	collagenase 3 (mmp-13)	WAY	P45452	C21H21N3O5S	427.474	427.12	51	53	117.21	2.18	4.38	2	5	9	COc1ccc(cc1)S(=O)(=O)N(c1c(C)cccc1C(=O)NO)Cc1cccnc1	1	C263H75CaN61O68SZn+4	train	ZnCa
1fo2	general	Protein-Ligand	2.38	IC50=20uM	IC50	4.7	2001	alpha 1,2-mannosidase	DMJ	Q9UKM7	C6H14NO4	164.18	164.092	25	25	97.53	-2.35	-2.42	5	4	5	OC[C@H]1[NH2+]C[C@H]([C@H]([C@@H]1O)O)O	1	C260H105CaN63O87S+5	train	Ca
1fo3	general	Protein-Ligand	1.75	IC50=0.2uM	IC50	6.7	2001	alpha 1,2-mannosidase	KIF	Q9UKM7	C8H12N2O6	232.191	232.07	28	29	130.33	-2.78	-4.01	5	6	5	OC[C@@H]1[C@@H](O)[C@H](O)[C@@H]([C@@H]2N1C(=O)C(=O)N2)O	1	C257H101CaN64O82S+5	valid	Ca
1fpp	general	Protein-Ligand	2.75	Kd=10nM	Kd	8	1999	farnesyltransferase	FPP	Q02293 Q04631	C15H30O7P2	384.342	384.147	54	53	146.79	2.32	3.76	0	5	10	C/C(=C/COP(OP(O)(O)O)(O)O)/CC/C=C(/CCC=C(C)C)\C	1	C359H114N88O93S6Zn+6	train	Zn
1fpy	general	Protein-Ligand	2.89	Ki=1uM	Ki	6	2001	glutamine synthetase	PPQ	P0A1P6	C5H14NO4P	183.143	183.066	25	24	118.99	-3.54	-1.47	1	4	3	OC(=O)[C@H](CCP(O)(O)C)[NH3+]	1	C277H97Mn2N77O81S+7	train	Mn
1fsg	general	Protein-Ligand	1.05	IC50=9.5uM	IC50	5.02	2000	hypoxanthine-guanine phosphoribosyltransferase	9DG	Q26997	C6H6N4O	150.138	150.054	17	18	87.56	-0.76	0.41	3	1	0	Nc1nc2cc[nH]c2c(=O)[nH]1	1	C245H85Mg2N64O72S+6	train	Mg
1ft7	refined	Protein-Ligand	2.2	Ki=6.6uM	Ki	5.18	2000	BACTERIAL LEUCYL AMINOPEPTIDASE	PLU	Q01693	C5H16NO3P	169.159	169.087	26	25	101.92	-3.13	-0.66	1	3	2	[NH3+][C@H](P(O)(O)O)CC(C)C	1	C218H85N57O83S4Zn2+3	test	Zn
1fwe	general	Protein-Ligand	2	Ki=2.5uM	Ki	5.6	1997	Klebsiella aerogenes urease, C319A variant	HAE	P18314 P18315 P18316	C2H5NO2	75.067	75.032	10	9	49.33	-0.95	-0.1	2	2	2	CC(=O)NO	1	C170H70N56Ni2O55S3+5	valid	XX
1g05	general	Protein-Ligand	2.45	IC50=3.1nM	IC50	8.51	2001	stromelysin-1 precursor	BBH	P08254	C19H21N3O6S	419.452	419.115	50	52	124.63	0.73	2.3	2	5	8	ONC(=O)[C@H]1CC(=O)N(CN1S(=O)(=O)c1ccc(cc1)OC)Cc1ccccc1	1	C304H94CaN74O79SZn+6	train	ZnCa
1g1d	refined	Protein-Ligand	2.04	Kd=0.36nM	Kd	9.44	2000	carbonic anhydrase ii	FSB	P00918	C14H13FN2O3S	308.328	308.063	34	35	97.64	1.36	3.58	2	3	5	O=C(c1ccc(cc1)S(=O)(=O)N)NCc1ccccc1F	1	C325H99N84O73SZn+6	train	Zn
1g27	general	Protein-Ligand	2.1	IC50=7nM	IC50	8.15	2001	peptide deformylase	BB1	P0A6K3	C16H31N3O4	329.435	329.231	54	53	89.95	1.8	2.29	2	4	13	CCCC[C@@H](C(=O)N[C@@H](C(C)(C)C)C(=O)N(C)C)CN(C=O)O	1	C270H93N72NiO79S5+5	train	XX
1g2a	general	Protein-Ligand	1.75	IC50=10nM	IC50	8	2001	peptide deformylase	BB2	P0A6K3	C19H35N3O5	385.498	385.258	62	62	118.97	1.55	1.92	4	5	16	CCCCC[C@@H](C(=O)N[C@H](C(=O)N1CCC[C@H]1CO)C(C)C)CC(=O)NO	1	C292H104N79NiO82S5+7	train	XX
1g3b	general	Protein-Ligand	1.8	Ki=1.8uM	Ki	5.74	2001	trypsin beta	108	P00760	C11H14N3O3	236.247	236.104	31	31	121.5	2.98	-0.55	1	3	4	OC(=O)[C@@H](/N=C/c1cc(ccc1O)C(=[NH2+])N)C	1	C214H83MgN56O66S5+4	test	Mg
1g45	refined	Protein-Ligand	1.83	Kd=2.3nM	Kd	8.64	2000	carbonic anhydrase ii	FSB	P00918	C14H13FN2O3S	308.328	308.063	34	35	97.64	1.36	3.58	2	3	5	O=C(c1ccc(cc1)S(=O)(=O)N)NCc1ccccc1F	1	C298H96N78O70SZn+5	train	Zn
1g46	refined	Protein-Ligand	1.84	Kd=1.6nM	Kd	8.8	2000	carbonic anhydrase ii	F2B	P00918	C14H12F2N2O3S	326.318	326.054	34	35	97.64	1.46	3.71	2	3	5	O=C(c1ccc(cc1)S(=O)(=O)N)NCc1cccc(c1F)F	1	C344H107N88O78S2Zn+6	train	Zn
1g48	refined	Protein-Ligand	1.86	Kd=3.9nM	Kd	8.41	2000	carbonic anhydrase ii	F6B	P00918	C14H12F2N2O3S	326.318	326.054	34	35	97.64	1.46	3.71	2	3	5	O=C(c1ccc(cc1)S(=O)(=O)N)NCc1c(F)cccc1F	1	C338H101N88O80SZn+5	valid	Zn
1g49	general	Protein-Ligand	1.9	IC50=16nM	IC50	7.8	2001	stromelysin-1	111	P08254	C16H25N3O7S2	435.516	435.113	53	54	158.87	0.48	2.93	3	6	11	CCCCOc1ccc(cc1)S(=O)(=O)N1C[C@H](C[C@@H]1C(=O)NO)NS(=O)(=O)C	1	C302H96CaN69O76SZn+5	valid	ZnCa
1g4j	general	Protein-Ligand	1.84	Kd=2.0nM	Kd	8.7	2000	carbonic anhydrase ii	FFB	P00918	C14H9F5N2O3S	380.29	380.025	34	35	97.64	1.76	4.13	2	3	5	O=C(c1ccc(cc1)S(=O)(=O)N)NCc1c(F)c(F)c(c(c1F)F)F	1	C311H96N81O67S2Zn+6	test	Zn
1g4k	general	Protein-Ligand	2	IC50=2.0uM	IC50	5.7	2001	stromelysin-1	HQQ	P08254	C17H14N2O4	310.304	310.095	37	39	84.5	2.42	2.76	2	3	3	O=C1NC(=O)C(C(=O)N1)(C)c1ccc(cc1)Oc1ccccc1	1	C288H95CaN71O74SZn+6	train	ZnCa
1g4o	refined	Protein-Ligand	1.96	Kd=5.6nM	Kd	8.25	2000	carbonic anhydrase ii	BSB	P00918	C14H14N2O3S	290.338	290.073	34	35	97.64	1.26	3.44	2	3	5	O=C(c1ccc(cc1)S(=O)(=O)N)NCc1ccccc1	1	C297H101N78O72SZn+5	test	Zn
1g52	refined	Protein-Ligand	1.8	Kd=0.29nM	Kd	9.54	2000	carbonic anhydrase ii	F2B	P00918	C14H12F2N2O3S	326.318	326.054	34	35	97.64	1.46	3.71	2	3	5	O=C(c1ccc(cc1)S(=O)(=O)N)NCc1cccc(c1F)F	1	C322H99N81O73SZn+5	train	Zn
1g53	refined	Protein-Ligand	1.94	Kd=0.91nM	Kd	9.04	2000	carbonic anhydrase ii	F6B	P00918	C14H12F2N2O3S	326.318	326.054	34	35	97.64	1.46	3.71	2	3	5	O=C(c1ccc(cc1)S(=O)(=O)N)NCc1c(F)cccc1F	1	C347H105N86O78SZn+6	train	Zn
1g54	refined	Protein-Ligand	1.86	Kd=1.5nM	Kd	8.82	2000	carbonic anhydrase ii	FFB	P00918	C14H9F5N2O3S	380.29	380.025	34	35	97.64	1.76	4.13	2	3	5	O=C(c1ccc(cc1)S(=O)(=O)N)NCc1c(F)c(F)c(c(c1F)F)F	1	C315H99N80O72SZn+5	valid	Zn
1g9a	general	Protein-Ligand	2.1	IC50=5uM	IC50	5.3	2002	botulinum neurotoxin type b	BAB	P10844	C17H18N8	334.378	334.165	43	46	160.58	4.62	-0.64	2	2	4	NC(=[NH2+])c1ccc2c(c1)[nH]c(n2)Cc1nc2c([nH]1)ccc(c2)C(=[NH2+])N	1	C345H133N83O115S2Zn2+5	train	Zn
1g9b	general	Protein-Ligand	2	IC50=5uM	IC50	5.3	2002	botulinum neurotoxin type b	BAB	P10844	C17H18N8	334.378	334.165	43	46	160.58	4.62	-0.64	2	2	4	NC(=[NH2+])c1ccc2c(c1)[nH]c(n2)Cc1nc2c([nH]1)ccc(c2)C(=[NH2+])N	1	C353H136N86O118S2Zn2+5	train	Zn
1g9c	general	Protein-Ligand	2.35	IC50=5uM	IC50	5.3	2002	botulinum neurotoxin type b	BAB	P10844	C17H18N8	334.378	334.165	43	46	160.58	4.62	-0.64	2	2	4	NC(=[NH2+])c1ccc2c(c1)[nH]c(n2)Cc1nc2c([nH]1)ccc(c2)C(=[NH2+])N	1	C343H127N84O110S3Zn2+6	test	Zn
1g9r	general	Protein-Ligand	2	Ki=2uM	Ki	5.7	2001	glycosyl transferase	UPF	Q93EK7	C15H25FN2O16P2	570.309	570.066	61	63	310.26	-5.77	-4.69	6	11	14	OC[C@H]1O[C@H](OP(OP(OC[C@H]2O[C@H]([C@@H]([C@@H]2O)O)n2ccc(=O)[nH]c2=O)(O)O)(O)O)[C@@H]([C@H]([C@H]1O)O)F	1	C401H116MnN100O112SSe+5	valid	Mn
1ga8	general	Protein-Ligand	2	Ki=16mM	Ki	1.8	2001	galactosyl transferase lgtc	DEL	Q93EK7	C12H22O10	326.297	326.121	44	45	169.3	-4.31	-4.37	7	7	11	OC[C@@H]1C[C@H](O)[C@H]([C@@H](O1)O[C@@H]1[C@@H](CO)O[C@H]([C@@H]([C@H]1O)O)O)O	1	C323H103MnN82O91SSe2+6	valid	Mn
1gag	general	Protein-Ligand	2.7	Ki=750nM	Ki	6.12	2001	insulin receptor, tyrosine kinase domain	13-mer	P06213	C56H87N14O18S2	1308.5	1307.58	177	179	545.54	-4.75	-0.85	15	18	52	CSCC[C@@H](C(=O)N[C@H](C(=O)N[C@H](C(=O)N[C@H](C(=O)N1CCC[C@H]1C(=O)N[C@H](C(=O)NCC=O)C(C)C)CO)CCSC)CC(=O)N)NC(=O)[C@@H](NC(=O)[C@@H](NC(=O)CNC(=O)[C@H]([C@H](O)C)NC(=O)[C@@H](NC(=O)[C@H]1[NH2+]CCC1)C)CC(=O)O)Cc1ccccc1	1	C255H81Mg2N81O73S2+9	train	Mg
1ghy	refined	Protein-Ligand	1.85	Ki=0.008uM	Ki	8.1	2002	thrombin alpha	121	P28504 P00734	C13H12N5O	254.267	254.104	31	33	113.41	2.55	0.5	2	3	3	Oc1cccnc1c1nc2c([nH]1)cc(cc2)C(=[NH2+])N	1	C281H104N67O80S5Zn2+5	valid	Zn
1gi4	refined	Protein-Ligand	1.37	Ki=0.065uM	Ki	7.19	2002	trypsin beta	122	P00760	C14H13N4O	253.279	253.109	32	34	100.52	3.58	1.1	2	2	3	Oc1ccccc1c1nc2c([nH]1)cc(cc2)C(=[NH2+])N	1	C213H82N56O67S5Zn+4	valid	Zn
1grp	refined	Protein-Ligand	2.5	Ki=0.189mM	Ki	3.72	1996	isocitrate dehydrogenase	ICT	P08200	C6H8O7	192.124	192.027	21	20	132.13	1.73	-1.39	1	7	3	OC(=O)C[C@@H]([C@H](C(=O)O)O)C(=O)O	1	C206H97MgN62O63S+6	test	Mg
1gwv	refined	Protein-Ligand	2.5	Kd=2.68mM	Kd	2.57	2003	n-acetyllactosaminide	LAT	P14769	C12H22O11	342.296	342.116	45	46	189.53	-4.73	-5.4	8	8	12	OC[C@H]1O[C@@H](O)[C@@H]([C@H]([C@@H]1O[C@@H]1O[C@H](CO)[C@@H]([C@@H]([C@H]1O)O)O)O)O	1	C299H95MnN77O81S2+6	train	Mn
1gww	general	Protein-Ligand	1.8	Kd=0.258mM	Kd	3.59	2003	n-acetyllactosaminide	UDP	P14769	C9H16N2O12P2	406.177	406.018	41	42	251.34	-5.29	-3.49	3	9	7	O[C@@H]1[C@@H](COP(OP(O)(O)O)(O)O)O[C@H]([C@@H]1O)n1ccc(=O)[nH]c1=O	1	C342H109MnN91O89S6+8	test	Mn
1gx0	general	Protein-Ligand	1.8	Kd=0.060mM	Kd	4.22	2003	n-acetyllactosaminide	UDP	P14769	C9H18N2O12P2	408.193	408.033	43	44	245.89	-5.46	-3.01	3	9	7	O=C1CCN(C(=O)N1)[C@@H]1O[C@@H]([C@H]([C@H]1O)O)COP(OP(O)(O)O)(O)O	1	C369H115MnN96O95S6+8	valid	Mn
1gx4	general	Protein-Ligand	1.46	Kd=53uM	Kd	4.28	2003	n-acetyllactosaminide	UDP	P14769	C9H16N2O12P2	406.177	406.018	41	42	251.34	-5.29	-3.49	3	9	7	O[C@@H]1[C@@H](COP(OP(O)(O)O)(O)O)O[C@H]([C@@H]1O)n1ccc(=O)[nH]c1=O	1	C322H104MnN86O84S5+8	train	Mn
1gz3	general	Protein-Ligand	2.3	Ki=0.20mM	Ki	3.7	2003	nad-dependent malic enzyme	ATP	P23368	C10H19N5O13P3	510.205	510.019	50	52	329.38	-6.07	-2.36	3	12	9	O[C@@H]1[C@@H](COP(OP(OP(O)(O)O)(O)O)(O)O)O[C@H]([C@@H]1O)n1cnc2c1ncnc2N	1	C363H127MnN99O113S+5	train	Mn
1gz4	general	Protein-Ligand	2.2	Ki=0.2mM	Ki	3.7	2002	nad-dependent malic enzyme	ATP	P23368	C10H19N5O13P3	510.205	510.019	50	52	329.38	-6.07	-2.36	3	12	9	O[C@@H]1[C@@H](COP(OP(OP(O)(O)O)(O)O)(O)O)O[C@H]([C@@H]1O)n1cnc2c1ncnc2N	1	C384H129MnN100O119Se+4	train	Mn
1gz9	general	Protein-Ligand	1.7	Kd=0.31mM	Kd	3.51	2002	lectin	FUC-LAT	P83410	C18H32O15	488.438	488.174	65	67	248.45	-5.83	-6.55	10	10	16	OC[C@H]1O[C@@H](O[C@@H]2[C@@H](CO)O[C@H]([C@@H]([C@H]2O)O)O)[C@@H]([C@H]([C@H]1O)O)O[C@@H]1O[C@@H](C)[C@H]([C@H]([C@@H]1O)O)O	1	C188H61CaN57O61+3	train	Ca
1gzc	general	Protein-Ligand	1.58	Kd=0.32mM	Kd	3.49	2002	lectin	LAT	P83410	C12H22O11	342.296	342.116	45	46	189.53	-4.73	-5.4	8	8	12	OC[C@H]1O[C@@H](O)[C@@H]([C@H]([C@@H]1O[C@@H]1O[C@H](CO)[C@@H]([C@@H]([C@H]1O)O)O)O)O	1	C160H53CaN42O51+2	test	Ca
1h1d	general	Protein-Ligand	2	Ki=6.0nM	Ki	8.22	2003	catechol o-methyltransferase	BIA	P22734	C20H21F3N3O5	440.393	440.143	52	54	111.03	3.72	4.16	3	5	7	O=C(c1cc(O)c(c(c1)N(=O)=O)O)CC[NH+]1CCN(CC1)c1cccc(c1)C(F)(F)F	1	C213H71MgN49O57S3+5	train	Mg
1h2k	refined	Protein-Ligand	2.15	Ki=1.2mM	Ki	2.92	2002	FACTOR INHIBITING HIF-1 ALPHA WITH a HIF-1 ALPHA FRAGMENT PEPTIDE	OGA	Q9NWT6 Q16665	C4H5NO5	147.086	147.017	15	14	103.7	0.63	-1.34	1	5	2	OC(=O)CNC(=O)C(=O)O	1	C279H90FeN73O69S+6	train	Fe
1h4n	general	Protein-Ligand	2	Ki=12uM	Ki	4.92	1997	carbonic anhydrase ii	TRS	P00918	C4H12NO3	122.143	122.082	20	19	88.33	-2.88	-3.06	4	3	6	OCC(CO)(CO)[NH3+]	1	C275H84N69O60SZn+3	train	Zn
1h8l	general	Protein-Ligand	2.6	Ki=34nM	Ki	7.47	2002	carboxypeptidase gp180 residues 503-882	GEM	P83852	C7H14N3O4S	236.269	236.071	29	28	165.91	2.89	-1.6	0	4	5	OC(=O)C[C@@H](C(=O)O)SCC[NH+]=C(N)N	1	C259H83N73O82S2Zn+3	valid	Zn
1hdq	refined	Protein-Ligand	2.3	Ki=1.5uM	Ki	5.82	2001	carboxypeptidase a	INF	P00730	C10H12N2O4	224.213	224.08	28	28	98.66	1.35	1.15	3	4	6	ONC(=O)N[C@@H](C(=O)O)Cc1ccccc1	1	C277H90N68O77Zn+3	train	Zn
1hee	refined	Protein-Ligand	1.75	Ki=4.6uM	Ki	5.34	2001	carboxypeptidase a	LHY	P00730	C10H12N2O4	224.213	224.08	28	28	98.66	1.35	1.15	3	4	6	ONC(=O)N[C@H](C(=O)O)Cc1ccccc1	1	C304H96N76O87Zn+3	train	Zn
1hfs	refined	Protein-Ligand	1.7	Ki=2nM	Ki	8.7	1998	stromelysin-1	L04	P08254	C43H48FN3O5	705.857	705.358	100	104	115.81	9.06	8.53	2	5	19	Fc1ccc(cc1)c1ccc(cc1)CC[C@@H](C(=O)N[C@H](C(=O)Nc1ccccc1)CC(C)C)C[C@@H](C(=O)O)CCCCN1Cc2c(C1=O)cccc2	1	C438H137CaN112O119S2Zn2+9	train	ZnCa
1hlk	refined	Protein-Ligand	2.5	Ki=10uM	Ki	5	2001	beta-lactamase ii	113	P25910	C15H14O8	322.267	322.069	37	39	126.43	2.12	1.51	2	5	3	CO[C@@H]1O[C@@H](C)Cc2c1c(=O)c1c(o2)cc(c(c1C(=O)O)O)O	1	C220H77N63O66S4Zn2+4	valid	Zn
1hp0	general	Protein-Ligand	2.1	Ki=0.2uM	Ki	6.7	2001	purine nucleoside hydrolase	AD3	Q9GPQ4	C11H14N4O4	266.253	266.102	33	35	126.65	-1.59	-0.79	4	5	5	OC[C@H]1O[C@H]([C@@H]([C@@H]1O)O)n1cnc2c1ccnc2N	1	C282H90CaN69O79S4+3	train	Ca
1hq5	general	Protein-Ligand	2.3	Kd=2.22uM	Kd	5.65	2001	arginase 1	S2C	P07824	C5H14BNO5S	211.044	211.069	27	26	150.93	-3.01	-2.67	4	5	8	OC(=O)[C@H](CSCC[B](O)(O)O)[NH3+]	1	C238H83Mn2N72O84S2+3	train	Mn
1hqf	general	Protein-Ligand	2.9	Ki=10uM	Ki	5	2001	arginase 1	HAR	P07824	C6H16N4O3	192.216	192.122	29	28	137.19	-1.95	-3.07	2	3	5	ON/C(=[NH+]\CCC[C@@H](C(=O)O)[NH3+])/N	1	C256H92Mn2N76O89S+4	valid	Mn
1hqg	general	Protein-Ligand	2	Ki=1.0mM	Ki	3	2001	arginase 1	ORN	P07824	C5H14N2O2	134.177	134.106	23	22	92.58	-2.71	-2.3	2	2	3	OC(=O)[C@@H]([NH3+])CCC[NH3+]	1	C169H73Mn2N49O62+3	test	Mn
1hqh	general	Protein-Ligand	2.8	Ki=0.5uM	Ki	6.3	2001	arginase 1	NNH	P07824	C5H12N4O3	176.174	176.091	24	23	134.36	-2.58	-3.07	1	4	3	O=N/C(=[NH+]\CC[C@@H](C(=O)O)[NH3+])/N	1	C231H82Mn2N70O82S2+3	train	Mn
1hs6	general	Protein-Ligand	1.95	IC50=4.2uM	IC50	5.38	2001	human Leukotriene A-4 hydrolase (LTA4H)	BES	P09960	C16H25N2O4	309.381	309.181	47	47	114.27	-0.08	0.21	3	4	9	O[C@@H]([C@@H](Cc1ccccc1)[NH3+])C(=O)N[C@H](C(=O)O)CC(C)C	1	C375H139N96O112S4Zn+6	test	Zn
1hv5	general	Protein-Ligand	2.6	Ki=5nM	Ki	8.3	2001	stromelysin 3	RXP	Q02853	C39H44N4O6P	695.764	695.3	94	98	180.36	5.34	7.13	4	5	20	O=C(N[C@@H](P(C[C@H](C(=O)N[C@H](C(=O)N)Cc1c[nH]c2c1cccc2)CCCc1ccccc1)(O)O)Cc1ccccc1)OCc1ccccc1	1	C352H105CaN86O92SZn2+7	train	ZnCa
1hww	general	Protein-Ligand	1.87	IC50=20nM	IC50	7.7	2002	alpha-mannosidase ii	SWA	Q24451	C8H16NO3	174.218	174.113	28	29	65.13	-1.26	-1.3	4	3	3	O[C@@H]1C[N@@H+]2[C@@H]([C@@H]1O)[C@H](O)CCC2	1	C261H92N65O80SZn+5	train	Zn
1hxk	general	Protein-Ligand	1.5	IC50=400uM	IC50	3.4	2002	alpha-mannosidase ii	DMJ	Q24451	C6H14NO4	164.18	164.092	25	25	97.53	-2.35	-2.42	5	4	5	OC[C@H]1[NH2+]C[C@H]([C@H]([C@@H]1O)O)O	1	C244H88N61O75SZn+5	train	Zn
1hy7	general	Protein-Ligand	1.5	IC50=4.09uM	IC50	5.39	2002	stromelysin-1	MBS	P08254	C20H21NO6S	403.449	403.109	49	50	110.31	3.37	3.61	1	4	8	COCC#CC[C@H](C(=O)O)NS(=O)(=O)c1ccc(cc1)c1ccc(cc1)OC	1	C352H111CaN86O91SZn2+8	train	ZnCa
1hyo	refined	Protein-Ligand	1.3	Ki=84.8uM	Ki	4.07	2001	fumarylacetoacetate hydrolase	HBU	P35505	C5H10O5P	181.104	181.027	21	20	108.42	-0.86	-0.51	0	5	3	O=C(CP(O)(O)C)CC(=O)O	1	C282H98CaMgN71O85S5+4	valid	MgCa
1i8j	general	Protein-Ligand	1.9	IC50=39uM	IC50	4.41	2001	porphobilinogen synthase	DSB	P0ACB2	C10H18O4	202.248	202.121	32	31	74.6	4.99	2.28	0	4	7	OC(=O)CCCCCCCCC(=O)O	1	C319H99N75O91S6Zn+4	train	Zn
1i8z	general	Protein-Ligand	1.93	IC50=1.27nM	IC50	8.9	2001	carbonic anhydrase ii	INL	P00918	C18H24N3O6S3	474.595	474.083	54	57	165.44	1.28	3.94	2	4	5	COc1cccc(c1)N1[C@H](C[NH+]2CCOCC2)Cc2c(S1(=O)=O)sc(c2)S(=O)(=O)N	1	C348H108N92O80SZn+7	train	Zn
1i90	general	Protein-Ligand	2	IC50=1.28nM	IC50	8.89	2001	carbonic anhydrase ii	INM	P00918	C10H18N3O5S3	356.462	356.041	39	40	179.41	-1.14	1.52	2	4	5	COCCCN1C[C@H]([NH3+])c2c(S1(=O)=O)sc(c2)S(=O)(=O)N	1	C330H95N84O71Zn+6	train	Zn
1i91	general	Protein-Ligand	2	IC50=1.15nM	IC50	8.94	2001	carbonic anhydrase ii	INQ	P00918	C17H22N3O6S3	460.568	460.067	51	54	176.44	0.95	3.63	3	5	5	Oc1cccc(c1)N1[C@H](C[NH+]2CCOCC2)Cc2c(S1(=O)=O)sc(c2)S(=O)(=O)N	1	C306H94N75O64SZn+4	valid	Zn
1i9l	general	Protein-Ligand	1.93	Kd=3.3nM	Kd	8.48	2001	carbonic anhydrase ii	INV	P00918	C14H13FN2O3S	308.328	308.063	34	35	97.64	1.36	3.58	2	3	5	Fc1ccc(cc1)CNC(=O)c1ccc(cc1)S(=O)(=O)N	1	C334H103N84O77SZn+6	test	Zn
1i9m	general	Protein-Ligand	1.84	Kd=3.3nM	Kd	8.48	2001	carbonic anhydrase ii	INW	P00918	C14H12F2N2O3S	326.318	326.054	34	35	97.64	1.46	3.71	2	3	5	Fc1ccc(c(c1)F)CNC(=O)c1ccc(cc1)S(=O)(=O)N	1	C329H104N87O76SZn+6	test	Zn
1i9n	refined	Protein-Ligand	1.86	Kd=2.2nM	Kd	8.66	2001	carbonic anhydrase ii f131v	IOA	P00918	C14H12F2N2O3S	326.318	326.054	34	35	97.64	1.46	3.71	2	3	5	Fc1ccc(c(c1)CNC(=O)c1ccc(cc1)S(=O)(=O)N)F	1	C326H101N85O76SZn+5	valid	Zn
1i9o	general	Protein-Ligand	1.86	Kd=3.8nM	Kd	8.42	2001	carbonic anhydrase ii	IOC	P00918	C14H11F3N2O3S	344.309	344.044	34	35	97.64	1.56	3.85	2	3	5	O=C(c1ccc(cc1)S(=O)(=O)N)NCc1ccc(c(c1F)F)F	1	C306H92N82O68S2Zn+7	train	Zn
1i9p	refined	Protein-Ligand	1.92	Kd=3.9nM	Kd	8.41	2001	carbonic anhydrase ii f131v	IOE	P00918	C14H11F3N2O3S	344.309	344.044	34	35	97.64	1.56	3.85	2	3	5	O=C(c1ccc(cc1)S(=O)(=O)N)NCc1c(F)cc(cc1F)F	1	C214H70N57O50SZn+6	train	Zn
1i9q	general	Protein-Ligand	1.8	Kd=3.9nM	Kd	8.41	2001	carbonic anhydrase ii	IOF	P00918	C14H11F3N2O3S	344.309	344.044	34	35	97.64	1.56	3.85	2	3	5	O=C(c1ccc(cc1)S(=O)(=O)N)NCc1cc(F)c(c(c1)F)F	1	C312H100N80O67S2Zn+6	test	Zn
1icj	general	Protein-Ligand	1.9	Ki=6mM	Ki	2.22	1999	peptide deformylase	PGO	P0A6K3	C18H38O10	414.488	414.246	66	65	114.3	-2.32	-0.9	2	2	27	OCCOCCOCCOCCOCCOCCOCCOCCOCCO	1	C254H92N68NiO71S4+6	train	XX
1if7	refined	Protein-Ligand	1.98	Kd=30pM	Kd	10.52	2001	carbonic anhydrase ii	SBR	P00918	C19H21N3O3S	371.453	371.13	47	49	102.57	2.27	4.53	2	3	7	C[C@@H](Cn1ccc2c1cccc2)CNC(=O)c1ccc(cc1)S(=O)(=O)N	1	C356H108N87O83Zn+6	train	Zn
1if8	refined	Protein-Ligand	1.94	Kd=230pM	Kd	9.64	2001	carbonic anhydrase ii	SBS	P00918	C19H21N3O3S	371.453	371.13	47	49	102.57	2.27	4.53	2	3	7	C[C@H](Cn1ccc2c1cccc2)CNC(=O)c1ccc(cc1)S(=O)(=O)N	1	C344H109N86O82SZn+6	test	Zn
1igb	refined	Protein-Ligand	2.3	Ki=0.4uM	Ki	6.4	1996	beta-d-glucan glucohydrolase isoenzyme exo1	IPO	Q01693	C9H12IN2O2	307.108	306.994	26	26	76.97	0.78	0.34	3	2	5	ONC(=O)[C@@H](Cc1ccc(cc1)I)[NH3+]	1	C231H88N57O84S4Zn2+4	valid	Zn
1ih0	general	Protein-Ligand	NMR	Kd=10uM	Kd	5	2001	troponin c, slow skeletal and cardiac muscles	EMD	P63316	C22H26N3O4S	428.525	428.164	56	59	109.78	3.34	4.62	2	2	5	COc1cc(ccc1OC)C(=O)N1CCCc2c1ccc(c2)[C@H]1[NH2+]NC(=O)S[C@@H]1C	1	C250H87Ca2N56O82S4+5	train	Ca
1ind	general	Protein-Ligand	2.2	Kd=0.09nM	Kd	10.05	1993	antibody fab fragment	EOT		C20H30N4O9S	502.539	502.173	64	64	234.46	-1.4	-3.55	5	9	15	OCCNC(=S)Nc1ccc(cc1)C[C@H]([NH+](CC(=O)O)CC(=O)O)C[NH+](CC(=O)O)CC(=O)O	1	C167H53InN45O48S+3	train	XX
1it6	general	Protein-Ligand	2	Ki=4.1nM	Ki	8.39	2002	serine/threonine protein phosphatase pp1-gamma	CYU	P36873	C42H66N2O11P	805.954	805.44	122	124	221.71	6.45	6.86	3	8	20	CO[C@H]([C@H]1O[C@@]2(C([C@H]1OP(O)(O)O)(C)C)C[C@@H](O)[C@@H]([C@@H](O2)C/C=C/c1coc(n1)[C@H](CC)C)C)C[C@@H]([C@@H]([C@@H]([C@@H](/C=C(/C(=C/C=C/C(=C\C#N)/C)/C)\C)C)O)C)O	1	C321H114Mn2N88O103S2+7	test	Mn
1iy7	refined	Protein-Ligand	2	Ki=0.64uM	Ki	6.19	2003	carboxypeptidase a	CXA	P00730	C9H12N2O4S	244.268	244.052	28	28	117.87	1.13	1.65	2	4	4	OC(=O)[C@@H](NS(=O)(=O)N)Cc1ccccc1	1	C292H95N71O80Zn+3	train	Zn
1j1a	general	Protein-Ligand	2.2	IC50=0.029uM	IC50	7.54	2003	phospholipase a2	BHP	P14555	C31H37NO4	487.63	487.272	73	75	75.63	8.2	6.74	1	3	16	OC(=O)CC[C@@H](Cc1ccc(cc1)OCc1ccccc1)NC(=O)CCCCCCc1ccccc1	1	C408H137CaN103O108S9+12	train	Ca
1j36	refined	Protein-Ligand	2.4	Ki=18nM	Ki	7.74	2003	angiotensin converting enzyme	LPR	Q10714	C21H31N3O5	405.488	405.226	60	61	139.16	-1.33	-0.79	2	5	11	[NH3+]CCCC[C@@H](C(=O)N1CC=C[C@H]1C(=O)O)[NH2+][C@H](C(=O)O)CCc1ccccc1	1	C380H135N99O109S4Zn+9	train	Zn
1j37	refined	Protein-Ligand	2.4	Ki=1.1nM	Ki	8.96	2003	angiotensin converting enzyme	X8Z	Q10714	C9H15NO3S	217.285	217.077	29	29	96.41	1.52	0.57	0	3	4	SC[C@H](C(=O)N1CCC[C@H]1C(=O)O)C	1	C257H94N72O72S3Zn+7	test	Zn
1jao	refined	Protein-Ligand	2.4	Ki=1.2uM	Ki	5.92	1996	matrix metalloproteinase-8	0D3	P22894	C15H21N3O3S	323.411	323.13	43	43	140.09	0.44	1.36	3	3	11	SC[C@H](C(=O)N[C@H](C(=O)NCC(=O)N)C)Cc1ccccc1	1	C266H84CaN66O68SZn+5	valid	ZnCa
1jaq	refined	Protein-Ligand	2.25	Ki=33uM	Ki	4.48	1996	matrix metalloproteinase-8	01S	P22894	C12H22N4O5	302.327	302.159	43	42	150.62	-1.09	0.13	5	5	12	ONC(=O)[C@H](C(=O)N[C@H](C(=O)NCC(=O)N)C)CC(C)C	1	C238H70CaN60O57SZn+5	test	ZnCa
1jcx	refined	Protein-Ligand	1.8	Ki=7.0uM	Ki	5.15	2002	2-dehydro-3-deoxyphosphooctonate aldolase	PAI	O66496	C9H24NO13P2	416.233	416.072	49	48	280.45	-7.84	-6.23	5	12	13	OC(=O)C[N@H+](CP(O)(O)O)C[C@H]([C@H]([C@@H]([C@@H](COP(O)(O)O)O)O)O)O	1	C314H124CdN94O100S+9	test	XX
1jd0	general	Protein-Ligand	1.5	Ki=5.7nM	Ki	8.24	2001	extracellular domain of human zinc enzyme carbonic anhydrase XII	AZM	O43570	C4H6N4O3S2	222.245	221.988	19	19	151.66	-1.23	1	2	5	3	CC(=O)Nc1nnc(s1)S(=O)(=O)N	1	C300H98N81O78S2Zn+5	train	Zn
1jh1	general	Protein-Ligand	2.7	Ki=41uM	Ki	4.39	2001	matrix metalloproteinase 8	JST	P22894	C12H12ClN3S	265.762	265.044	29	30	62.05	3.58	2.69	1	0	3	C=CC/N=C\1/SCC(=NN1)c1ccc(cc1)Cl	1	C280H86CaN68O73SZn+5	train	ZnCa
1jiz	general	Protein-Ligand	2.6	IC50=2.0nM	IC50	8.7	2002	macrophage metalloelastase (mmp-12)	CGS	P39900	C18H21N3O5S	391.441	391.12	48	49	114.38	2.15	3.68	0	5	8	O=NC(=O)[C@H](N(S(=O)(=O)c1ccc(cc1)OC)Cc1cccnc1)C(C)C	1	C247H79CaN61O60S2Zn+6	train	ZnCa
1jj9	general	Protein-Ligand	2	IC50=1.7uM	IC50	5.77	2001	matrix metalloproteinase 8	BBT	P22894	C17H22N3O4	332.374	332.161	46	48	99.94	0.91	1.15	4	4	5	OCC[C@@H]1CC[N@H+](CC1)C1(C(=O)NC(=O)NC1=O)c1ccccc1	1	C221H67CaN57O55SZn+5	train	ZnCa
1jje	general	Protein-Ligand	1.8	IC50=3.7nM	IC50	8.43	2001	metallo-beta-lactamase imp-1	BYS	Q79MP6	C19H18O6	342.343	342.11	43	45	93.06	5.42	2.6	0	4	5	OC(=O)[C@H]([C@@H](C(=O)O)Cc1ccccc1)Cc1ccc2c(c1)OCO2	1	C238H75N66O69SZn2+6	test	Zn
1jjt	general	Protein-Ligand	1.8	IC50=9nM	IC50	8.05	2001	metallo-beta-lactamase imp-1	BDS	Q79MP6	C20H18O8	386.352	386.1	46	49	111.52	5.23	2.33	0	4	5	OC(=O)[C@H]([C@@H](C(=O)O)Cc1ccc2c(c1)OCO2)Cc1ccc2c(c1)OCO2	1	C246H82N69O74SZn2+7	train	Zn
1jk7	general	Protein-Ligand	1.9	IC50=3nM	IC50	8.52	2001	human Protein phosphatase-1 (PP1)	OKA	P36873	C44H68O13	805.003	804.466	125	131	182.83	4.29	5.21	4	6	13	CC1=C[C@]2(O[C@@H](C1)[C@@H](/C=C/[C@H]1CC[C@]3(O1)CC[C@@H]1[C@@H](O3)[C@H](O)C(=C)[C@H](O1)[C@H](C[C@@H]([C@H]1O[C@@]3(CCCCO3)CC[C@H]1C)C)O)C)O[C@@H](CC[C@H]2O)C[C@](C(=O)O)(O)C	1	C271H103Mn2N85O88S3+8	train	Mn
1jn2	general	Protein-Ligand	1.9	Kd=82uM	Kd	4.09	2003	concanavalin a	SFP	P02866	C22H27N3O6S2	493.596	493.134	60	62	239.81	2.45	7.06	3	6	4	C/C(=C(/c1ccc([nH]1)/C(=C(\N)/C)/c1ccc(cc1)S(O)(O)O)\c1ccc(cc1)S(O)(O)O)/N	1	C182H64CaN52O65+4	train	Ca
1jt1	general	Protein-Ligand	1.78	Ki=400uM	Ki	3.4	2003	metallo-beta-lactamase	MCO	Q9K578	C9H15NO3S	217.285	217.077	29	29	96.41	1.52	0.57	0	3	4	SC[C@@H](C(=O)N1CCC[C@@H]1C(=O)O)C	1	C218H83N56O63S2Zn2+6	train	Zn
1juy	general	Protein-Ligand	2.6	Ki=22nM	Ki	7.66	1997	adenylosuccinate synthetase	H5P	P0A7D4	C7H12N2O9P	299.152	299.028	31	32	191.4	-4.58	-3.03	4	7	4	O=C1NC(=O)[C@@]2(N1)O[C@@H]([C@H]([C@H]2O)O)COP(O)(O)O	1	C287H103MgN99O94+10	train	Mg
1kc7	refined	Protein-Ligand	2.2	Ki=3uM	Ki	5.52	2002	pyruvate phosphate dikinase	PPR	P22983	C3H6O6P	169.05	168.99	16	15	128.65	-1.4	-1.62	0	6	1	OC(=O)C(=O)CP(O)(O)O	1	C199H81MgN57O61S6+5	train	Mg
1kf0	general	Protein-Ligand	2.5	Kd=2.80mM	Kd	2.55	2002	phosphoglycerate kinase	ACP	Q7SIB7	C11H21N5O12P3	508.232	508.04	52	54	320.15	-6.21	-2.25	3	12	9	O[C@@H]1[C@@H](COP(OP(CP(O)(O)O)(O)O)(O)O)O[C@H]([C@@H]1O)n1cnc2c1ncnc2N	1	C236H82MgN58O63S4+3	train	Mg
1kmy	refined	Protein-Ligand	2	Kd=8uM	Kd	5.1	2002	2,3-dihydroxybiphenyl-1,2-dioxygenase	BPY	P47228	C12H10O2	186.207	186.068	24	25	40.46	2.84	2.76	2	2	3	Oc1c(O)cccc1c1ccccc1	1	C273H108FeN85O70S6+13	valid	Fe
1kr3	general	Protein-Ligand	2.5	Ki=10uM	Ki	5	2003	beta-lactamase type ii	113	P25910	C15H14O8	322.267	322.069	37	39	126.43	2.12	1.51	2	5	3	CO[C@@H]1O[C@@H](C)Cc2c1c(=O)c1c(o2)cc(c(c1C(=O)O)O)O	1	C195H73N58O59S4Zn2+4	valid	Zn
1kug	refined	Protein-Ligand	1.37	Ki=0.160mM	Ki	3.8	2002	metalloproteinase	3-mer	O57413	C20H23N5O6	429.427	429.165	54	56	183.48	-0.19	0.73	5	6	10	NC(=O)C[C@@H](C(=O)N[C@H](C(=O)O)Cc1c[nH]c2c1cccc2)NC(=O)[C@@H]1CCC(=O)N1	1	C247H84Cd2N68O68S5+7	train	XX
1kui	refined	Protein-Ligand	1.5	Ki=0.169mM	Ki	3.77	2002	metalloproteinase	3-mer	O57413	C21H25N5O6	443.453	443.18	57	59	183.48	0.17	1.12	5	6	11	NC(=O)CC[C@@H](C(=O)N[C@H](C(=O)O)Cc1c[nH]c2c1cccc2)NC(=O)[C@@H]1CCC(=O)N1	1	C256H87Cd2N70O73S5+7	train	XX
1kuk	refined	Protein-Ligand	1.45	Ki=0.124mM	Ki	3.91	2002	metalloproteinase	3-mer	O57413	C22H30N5O5	444.504	444.225	62	64	168.03	-1.19	0.57	5	5	12	[NH3+]CCCC[C@@H](C(=O)N[C@H](C(=O)O)Cc1c[nH]c2c1cccc2)NC(=O)[C@@H]1CCC(=O)N1	1	C220H76Cd2N62O62S4+5	valid	XX
1kvo	general	Protein-Ligand	2	IC50=0.013uM	IC50	7.89	1997	phospholipase a2	OAP	P14555	C31H37NO3S	503.695	503.249	73	75	91.7	8.9	7.3	1	3	16	O=C(N[C@H](CSc1ccc(cc1)Cc1ccccc1)CCC(=O)O)CCCCCCc1ccccc1	1	C316H101Ca2N83O85S9+11	test	Ca
1kwq	general	Protein-Ligand	2.6	IC50=0.62nM	IC50	9.21	2003	carbonic anhydrase ii	SG1	P00918	C10H11N3O5S	285.276	285.042	30	31	134.67	-0.26	2.74	1	5	2	O=C1CCCN1c1ccc(cc1N(=O)=O)S(=O)(=O)N	1	C289H93N76O66SZn+5	train	Zn
1kwr	general	Protein-Ligand	2.25	IC50=0.25uM	IC50	6.6	2003	carbonic anhydrase ii	SG2	P00918	C8H8N2O3S2	244.291	243.998	23	24	118.78	0.57	2.03	1	3	1	O=c1sn(c2c1cc(cc2)S(=O)(=O)N)C	1	C322H100N81O70S2Zn+6	train	Zn
1l6s	general	Protein-Ligand	1.7	IC50=39uM	IC50	4.41	2002	porphobilinogen synthase	DSB	P0ACB2	C10H18O4	202.248	202.121	32	31	74.6	4.99	2.28	0	4	7	OC(=O)CCCCCCCCC(=O)O	1	C312H98N72O86S6Zn+4	valid	Zn
1l6y	general	Protein-Ligand	1.9	IC50=0.22mM	IC50	3.66	2002	porphobilinogen synthase	4OX	P0ACB2	C10H18O4	202.248	202.121	32	31	74.6	4.99	2.28	0	4	7	OC(=O)CCCCCCCCC(=O)O	1	C299H97N75O82S5Zn+8	valid	Zn
1lan	refined	Protein-Ligand	1.9	Ki=60nM	Ki	7.22	1995	leucine aminopeptidase	LEU	P00727	C6H14NO2	132.181	132.102	23	22	64.94	-0.79	-0.27	1	2	2	[NH3+][C@H](C(=O)O)CC(C)C	1	C185H79N53O62S7Zn2+3	train	Zn
1lcp	refined	Protein-Ligand	1.65	Ki=0.23uM	Ki	6.64	1995	leucine aminopeptidase	PLU	P00727	C5H16NO3P	169.159	169.087	26	25	101.92	-3.13	-0.66	1	3	2	[NH3+][C@H](P(O)(O)O)CC(C)C	1	C210H89N62O71S5Zn2+3	valid	Zn
1ld7	general	Protein-Ligand	2	IC50=1.1nM	IC50	8.96	2002	farnesyltransferase alpha subunit	U66	P49354 P49356	C27H24N5O2	450.512	450.193	58	63	87.76	3.3	4.61	1	3	0	N#Cc1ccc2cc1Oc1ccc3c(c1)c(ccc3)N1CC[C@@H](C1=O)[NH2+]CCc1n(C2)cnc1	1	C363H118N94O93S6Zn+6	train	Zn
1ld8	general	Protein-Ligand	1.8	IC50=3.5nM	IC50	8.46	2002	farnesyltransferase alpha subunit	U49	P49354 P49356	C26H22N5O2	436.485	436.177	55	60	87.76	2.84	4.57	1	3	0	N#Cc1ccc2cc1Oc1ccc3c(c1)c(ccc3)N1CC[C@@H]([NH2+]Cc3n(C2)cnc3)C1=O	1	C322H108N80O87S5Zn+4	test	Zn
1lgt	refined	Protein-Ligand	1.7	Kd=0.8uM	Kd	6.1	2002	biphenyl-2,3-diol 1,2-dioxygenase	BP3	P47228	C12H9ClO2	220.652	220.029	24	25	40.46	3.47	3.42	2	2	3	Clc1ccccc1c1cccc(c1O)O	1	C273H106FeN83O71S6+11	train	Fe
1lhv	general	Protein-Ligand	2	Kd=1.23nM	Kd	8.91	2002	N-terminal laminin G-like domain of human sex hormone-binding globulin	NOG	P04278	C21H28O2	312.446	312.209	51	54	37.3	3.04	3.88	1	2	3	C#C[C@]1(O)CC[C@@H]2[C@]1(CC)CC[C@H]1[C@H]2CCC2=CC(=O)CC[C@H]12	1	C343H100N82O91S3Zn+7	valid	Zn
1lkx	general	Protein-Ligand	3	Kd=7.1uM	Kd	5.15	2002	myosin ie heavy chain	ADP	Q03479	C10H17N5O10P2	429.217	429.045	44	46	266.1	-4.89	-2.04	3	10	7	O[C@@H]1[C@@H](COP(OP(O)(O)O)(O)O)O[C@H]([C@@H]1O)n1cnc2c1ncnc2N	1	C315H107MgN88O97S2+9	test	Mg
1lox	general	Protein-Ligand	2.4	Ki=3uM	Ki	5.52	1998	lipoxygenase-15	RS7	P12530	C17H20O2	256.339	256.146	39	39	37.3	6.53	4.11	0	2	6	CCCCCCC#Cc1ccccc1/C=C/C(=O)O	1	C377H115FeN102O95S3+7	valid	Fe
1lrh	refined	Protein-Ligand	1.9	Kd=0.15uM	Kd	6.82	2002	auxin-binding protein 1	NLA	P13689	C12H10O2	186.207	186.068	24	25	37.3	4.08	2.47	0	2	1	OC(=O)Cc1cccc2c1cccc2	1	C276H93N68O61Zn+8	train	Zn
1m1b	refined	Protein-Ligand	2.25	Ki=22uM	Ki	4.66	2002	phosphoenolpyruvate phosphomutase	SPV	P56839	C3H6O6S	170.141	169.989	16	15	140.36	-0.45	-0.14	0	6	1	OC(=O)C(=O)CS(O)(O)O	1	C262H103MgN74O74S+6	train	Mg
1m2x	refined	Protein-Ligand	1.5	Ki=70uM	Ki	4.15	2003	class b carbapenemase blab-1	MCO	O08498	C9H15NO3S	217.285	217.077	29	29	96.41	1.52	0.57	0	3	4	SC[C@H](C(=O)N1CCC[C@@H]1C(=O)O)C	1	C202H74N62O63SZn2+8	train	Zn
1mcz	general	Protein-Ligand	2.8	Ki=1mM	Ki	3	2003	benzoylformate decarboxylase	RMN	P20906	C8H8O3	152.147	152.047	19	19	57.53	1.72	0.8	1	3	2	O[C@H](c1ccccc1)C(=O)O	1	C246H89MgN68O78S+3	valid	Mg
1mdl	general	Protein-Ligand	1.85	Ki=810uM	Ki	3.09	1996	Pseudomonas aeruginosa MANDELATE RACEMASE MUTANT K166R	RMN	P11444	C8H8O3	152.147	152.047	19	19	57.53	1.72	0.8	1	3	2	O[C@H](c1ccccc1)C(=O)O	1	C259H101MgN69O74S4+6	train	Mg
1mf4	general	Protein-Ligand	1.9	Ki=10.2nM	Ki	7.99	2003	phospholipase a2	5-mer	P60045	C26H44N8O7	580.677	580.333	85	85	267.58	-0.72	-2.37	6	7	21	OC[C@@H](C(=O)O)NC(=O)[C@@H](NC(=O)[C@H](Cc1ccccc1)NC(=O)[C@@H](NC(=O)[C@H](C(C)C)[NH3+])C)CCC[NH+]=C(N)N	1	C285H89CaN73O81S6+7	train	Ca
1mkd	general	Protein-Ligand	2.9	IC50=160nM	IC50	6.8	2003	camp-specific phosphodiesterase 4d	ZAR	Q08499	C12H10F2N2O3	268.216	268.066	29	30	64.21	2.15	2.05	1	1	4	COc1cc(ccc1OC(F)F)c1ccc(=O)[nH]n1	1	C298H115MgN83O85S4Zn+6	test	ZnMg
1mmp	general	Protein-Ligand	2.3	Ki=0.85uM	Ki	6.07	1996	matrilysin	RSS	P09237	C25H35N3O4	441.563	441.263	67	69	100.43	4.69	4.22	2	4	6	CC(C[C@@H](C(=O)N[C@H]1Cc2cn(c3c2cccc3)CCCCCCNC1=O)CC(=O)O)C	1	C242H82CaN63O65SZn+6	train	ZnCa
1mmq	refined	Protein-Ligand	1.9	Ki=0.03uM	Ki	7.52	1996	matrilysin	RRS	P09237	C25H36N4O4	456.578	456.274	69	71	112.46	2.51	4.03	4	4	9	ONC(=O)C[C@H](C(=O)N[C@H]1Cc2cn(c3c2cccc3)CCCCCCNC1=O)CC(C)C	1	C248H76CaN64O67S2Zn+5	test	ZnCa
1mmr	refined	Protein-Ligand	2.3	Ki=4.0uM	Ki	5.4	1996	matrilysin	SRS	P09237	C25H39N5O2S	473.674	473.282	72	74	119.21	5.69	5.9	2	2	7	CC(C[C@@H](C(=O)N[C@H]1Cc2cn(c3c2cccc3)CCCCCCNC1=O)CS(=N)(=N)C)C	1	C238H74CaN62O63SZn+5	valid	ZnCa
1mnc	general	Protein-Ligand	2.1	IC50=0.046nM	IC50	10.34	1995	catalytic domain of human neutrophil collagenase (MMP8 CLG1)	PLH	P22894	C18H27N3O4	349.425	349.2	52	52	107.53	1.29	2.19	4	4	13	CNC(=O)[C@H](Cc1ccccc1)NC(=O)[C@@H](CC(=O)NO)CC(C)C	1	C251H72CaN63O68SZn+4	train	ZnCa
1mns	general	Protein-Ligand	2	Ki=67uM	Ki	4.17	1993	mandelate racemase	APG	P11444	C9H10O3	166.174	166.063	22	22	57.53	1.91	0.98	1	3	2	OC(=O)[C@](c1ccccc1)(O)C	1	C277H107MgN74O82S2+7	train	Mg
1mrn	refined	Protein-Ligand	2.45	Ki=30uM	Ki	4.52	2003	thymidylate kinase	T5A	P9WKE1	C20H35N7O23P5	896.394	896.047	90	94	529.26	-8.85	-3.47	5	18	19	O[C@H]1C[C@@H](O[C@@H]1COP(OP(OP(OP(OP(OC[C@H]1O[C@H]([C@@H]([C@@H]1O)O)n1cnc2c1ncnc2N)(O)O)(O)O)(O)O)(O)O)(O)O)n1cc(C)c(=O)[nH]c1=O	1	C322H105MgN107O98+13	train	Mg
1mrs	refined	Protein-Ligand	2	Ki=110uM	Ki	3.96	2003	thymidylate kinase	5HU	P9WKE1	C10H16N2O9P	339.216	339.059	38	39	188.06	-3.46	-2.65	3	7	6	OCc1cn([C@H]2C[C@@H]([C@H](O2)COP(O)(O)O)O)c(=O)[nH]c1=O	1	C313H110MgN96O93S+10	train	Mg
1mzc	general	Protein-Ligand	2	IC50=0.06nM	IC50	10.22	2003	farnesyltransferase alpha subunit	BNE	P49354 P49356	C28H34N5O2	472.602	472.271	69	72	98.79	3.03	3.82	1	3	6	N#Cc1ccc(cc1Oc1cccc(c1)[C@]1(CC)CCCCN(C1=O)C)[C@@](c1cncn1C)([NH3+])C	1	C396H128N99O98S7Zn+7	valid	Zn
1n1m	refined	Protein-Ligand	2.5	Ki=2uM	Ki	5.7	2002	dipeptidyl peptidase iv/cd26	A3M	P27487	C9H19N2O	171.26	171.15	31	31	47.95	0.67	-0.19	1	1	3	[NH3+][C@H](C(=O)N1CCCC1)C(C)C	1	C276H84HgN70O71S+5	train	XX
1n51	refined	Protein-Ligand	2.3	Ki=14uM	Ki	4.85	2003	xaa-pro aminopeptidase	4-mer	P15034	C23H34N5O5	460.547	460.256	67	69	160.68	-0.55	-0.86	4	5	12	C[C@@H](C(=O)N)NC(=O)[C@@H]1CCCN1C(=O)[C@@H]1CCCN1C(=O)[C@H]([C@@H](Cc1ccccc1)[NH3+])O	1	C381H134Mn2N99O112S2+9	valid	Mn
1n95	general	Protein-Ligand	2.3	IC50=1.2nM	IC50	8.92	2003	farnesyltransferase alpha subunit	FTH	Q02293 Q04631	C31H29N6O	501.602	501.24	67	71	102.32	3.21	3.27	1	4	8	N#CC1=C(CN(CC1)C(=O)[C@H](Cc1cncn1C)[NH2+]Cc1ccc(cc1)C#N)c1cccc2c1cccc2	1	C408H118N105O109S6Zn+5	train	Zn
1ndv	refined	Protein-Ligand	2.3	Ki=1200nM	Ki	5.92	2003	adenosine deaminase	FR0	P56658	C16H16N7S2	370.475	370.091	41	44	176.09	4.66	2.82	2	2	5	NC(=[NH+]c1scc(n1)c1ccc(s1)CNc1nc2c([nH]1)cccc2)N	1	C351H117N91O99S5Zn+8	train	Zn
1ndw	refined	Protein-Ligand	2	Ki=5900nM	Ki	5.23	2003	adenosine deaminase	FR2	P56658	C14H17N3O2	259.304	259.132	36	37	81.14	0.82	1.85	2	3	7	OC[C@H](n1cnc(c1)C(=O)N)CCc1ccccc1	1	C269H97N76O78S3Zn+9	valid	Zn
1ndy	refined	Protein-Ligand	2	Ki=680nM	Ki	6.17	2003	adenosine deaminase	FR3	P56658	C18H19N3O2	309.362	309.148	42	44	81.14	2.07	3	2	3	7	OC[C@H](n1cnc(c1)C(=O)N)CCc1cccc2c1cccc2	1	C332H116N86O95S6Zn+8	train	Zn
1ndz	refined	Protein-Ligand	2	Ki=7.7nM	Ki	8.11	2003	adenosine deaminase	FR5	P56658	C27H29N7O3	499.564	499.233	66	70	132.99	1.19	3.79	3	5	12	OC[C@H](n1cnc(c1)C(=O)N)CCn1ccc2c1cc(cc2)NC(=O)CCc1nc2c(n1C)cccc2	1	C381H136N102O110S5Zn+7	train	Zn
1ni1	general	Protein-Ligand	2.3	IC50=0.90nM	IC50	9.05	2004	farnesyltransferase alpha subunit	2C5	Q02293 Q04631	C25H17Cl2N5O	474.341	473.081	50	53	87.52	4.51	5.84	0	4	6	N#Cc1ccc(cc1)[C@H](c1cncn1C)OCc1nc(Cl)c(cc1c1cccc(c1)Cl)C#N	1	C393H130N102O105S6Zn+7	test	Zn
1nj5	general	Protein-Ligand	2.8	Ki=50nM	Ki	7.3	2003	proline-trna synthetase	P5A	O26708	C15H22N7O7S	444.443	444.13	52	55	216.77	-2.72	-0.25	5	8	9	O[C@@H]1[C@@H](COS(=O)(=O)NC(=O)[C@@H]2CCC[NH2+]2)O[C@H]([C@@H]1O)n1cnc2c1ncnc2N	1	C336H119MgN89O98S+11	test	Mg
1nki	refined	Protein-Ligand	0.95	Kd=0.2uM	Kd	6.7	2004	fosfomycin resistance protein	PPF	Q9I4K6	CH4O5P	127.013	126.98	11	10	111.58	-1.26	-0.6	0	5	0	OC(=O)P(O)(O)O	1	C225H64MnN58O58S+5	train	Mn
1nl4	general	Protein-Ligand	2.7	IC50=0.39nM	IC50	9.41	2003	farnesyltransferase alpha subunit	FTL	Q02293 Q04631	C30H23N5	453.537	453.195	58	62	68.64	5.47	6.19	0	3	6	N#Cc1cccc(c1)CN(c1ccc(c(c1)c1cccc2c1cccc2)C#N)Cc1cncn1C	1	C423H136N109O112S6Zn+7	train	Zn
1o1s	refined	Protein-Ligand	2.3	Ki=49nM	Ki	7.31	2003	farnesyltransferase alpha subunit	1NH	Q02293 Q04631	C24H32O9P2	526.453	526.152	67	68	173.09	2.59	4.46	0	6	13	C/C(=C\CC/C(=C/COP(OP(O)(O)O)(O)O)/C)/COCc1cccc(c1)C(=O)c1ccccc1	1	C353H114N89O91S6Zn+6	train	Zn
1o5m	general	Protein-Ligand	2.3	IC50=1.9nM	IC50	8.72	2003	farnesyltransferase alpha subunit	336	Q02293 Q04631	C27H31Br2ClN4O2	638.822	636.05	67	71	79.53	4.75	6.49	1	3	5	Clc1cc(Br)c2c(c1)CCc1c([C@@H]2C2CCN(CC2)C(=O)CC2CCN(CC2)C(=O)N)ncc(c1)Br	1	C370H115N93O100S6Zn+7	test	Zn
1o5r	refined	Protein-Ligand	2.35	Ki=7.5nM	Ki	8.12	2004	adenosine deaminase	FR9	P56658	C24H26N6O3	446.502	446.207	59	62	127.2	1.07	4.05	4	4	12	OC[C@H](n1cnc(c1)C(=O)N)CCn1ccc2c1cc(cc2)NC(=O)NCc1ccccc1	1	C368H117N93O100S6Zn+7	train	Zn
1o7o	refined	Protein-Ligand	1.97	Kd=0.032mM	Kd	4.49	2003	n-acetyllactosaminide	UDP	P14769	C9H16N2O12P2	406.177	406.018	41	42	251.34	-5.29	-3.49	3	9	7	O[C@@H]1[C@@H](COP(OP(O)(O)O)(O)O)O[C@H]([C@@H]1O)n1ccc(=O)[nH]c1=O	1	C359H111MnN97O91S6+9	train	Mn
1o86	refined	Protein-Ligand	2	Ki=0.27nM	Ki	9.57	2003	angiotensin converting enzyme	LPR	P12821	C21H33N3O5	407.504	407.242	62	63	139.16	-1.24	-0.57	2	5	11	[NH3+]CCCC[C@@H](C(=O)N1CCC[C@H]1C(=O)O)[NH2+][C@H](C(=O)O)CCc1ccccc1	1	C371H146N99O106S3Zn+9	valid	Zn
1obx	general	Protein-Ligand	1.35	Kd=1.9uM	Kd	5.72	2003	syntenin 1	8-mer	O00560 Q01344	C21H31N4O8	467.493	467.214	64	64	209.77	-0.8	-1.33	5	8	15	OC[C@@H](C(=O)N[C@H](C(=O)N[C@H](C(=O)O)Cc1ccccc1)C(C)C)NC(=O)[C@H](CC(=O)O)[NH3+]	1	C234H93CoN57O67S+6	valid	XX
1oe0	general	Protein-Ligand	2.4	IC50=6.9uM	IC50	5.16	2003	deoxyribonucleoside kinase	TTP	Q9XZT6	C10H20N2O14P3	485.192	485.013	49	50	294.39	-5.12	-2.48	2	10	8	O[C@H]1C[C@@H](O[C@@H]1COP(OP(OP(O)(O)O)(O)O)(O)O)n1cc(C)c(=O)[nH]c1=O	1	C389H141MgN100O112S4+8	train	Mg
1okl	refined	Protein-Ligand	2.1	Kd=0.93uM	Kd	6.03	1997	carbonic anhydrase ii	MNS	P00918	C12H14N2O2S	250.317	250.078	31	32	71.78	1.86	3.33	1	2	2	CN(c1cccc2c1cccc2S(=O)(=O)N)C	1	C325H100N82O73SZn+7	valid	Zn
1oko	general	Protein-Ligand	1.6	Kd=29uM	Kd	4.54	2003	pa-i galactophilic lectin	GLB	Q05097	C6H12O6	180.156	180.063	24	24	110.38	-2.59	-3.22	5	5	6	OC[C@H]1O[C@@H](O)[C@@H]([C@H]([C@H]1O)O)O	1	C134H42CaN34O42S+	valid	Ca
1ols	refined	Protein-Ligand	1.85	Kd=1.52uM	Kd	5.82	2003	2-oxoisovalerate dehydrogenase	TDP	P12694 P21953	C12H21N4O7P2S	427.33	427.061	47	48	231.76	-1.41	1.34	1	7	7	Cc1ncc(c(n1)N)Cn1csc(c1C)CCOP(OP(O)(O)O)(O)O	1	C439H158MnN117O140S4+8	test	Mn
1olu	refined	Protein-Ligand	1.9	Kd=39.3uM	Kd	4.41	2003	2-oxoisovalerate dehydrogenase	TDP	P12694 P21953	C12H21N4O7P2S	427.33	427.061	47	48	231.76	-1.41	1.34	1	7	7	Cc1ncc(c(n1)N)Cn1csc(c1C)CCOP(OP(O)(O)O)(O)O	1	C385H143MgN99O126S3+6	train	Mg
1olx	refined	Protein-Ligand	2.25	Kd=47.1uM	Kd	4.33	2003	2-oxoisovalerate dehydrogenase	TDP	P12694 P21953	C12H21N4O7P2S	427.33	427.061	47	48	231.76	-1.41	1.34	1	7	7	Cc1ncc(c(n1)N)Cn1csc(c1C)CCOP(OP(O)(O)O)(O)O	1	C420H156MnN109O138S3+4	train	Mn
1onp	general	Protein-Ligand	2.5	IC50=0.030uM	IC50	7.52	2003	E. coli 1-deoxy-D-xylulose 5-phosphate reductoisomerase (DXR)	FOM	P45568	C4H10NO5P	183.1	183.03	21	20	120.78	-2.25	0.21	0	5	4	O=C[N](=O)CCCP(O)(O)O	1	C207H81MnN66O65S3+7	valid	Mn
1oq5	general	Protein-Ligand	1.5	IC50=21nM	IC50	7.68	2004	carbonic anhydrase ii	CEL	P00918	C17H14F3N3O2S	381.372	381.076	40	42	86.36	3.4	5.3	1	3	3	Cc1ccc(cc1)c1cc(nn1c1ccc(cc1)S(=O)(=O)N)C(F)(F)F	1	C337H101N86O73SZn+6	train	Zn
1ork	refined	Protein-Ligand	2.4	Kd=1.56nM	Kd	8.81	1999	tetracycline repressor	ATC	P0ACT4	C25H32N4O8	516.544	516.222	69	72	196.13	0.23	-2.44	8	8	10	C[NH+](CC(=O)Nc1ccc2c(c1O)C(=O)C1=C(O)[C@]3([C@@H](C[C@@H]1C2)[C@H]([NH+](C)C)C(=C(C3=O)C(=O)N)O)O)C	1	C401H134MgN109O121S3+7	train	Mg
1os0	refined	Protein-Ligand	2.1	Ki=0.93uM	Ki	6.03	2003	thermolysin	0PQ	P00800	C27H33N2O5P	496.535	496.213	68	70	148.09	1.42	2.69	2	5	12	O=C([C@@H](CP([C@H](Cc1ccccc1)[NH3+])(O)O)Cc1ccccc1)N[C@H](C(=O)O)Cc1ccccc1	1	C300H117CaN78O105SZn+3	train	ZnCa
1oxr	refined	Protein-Ligand	1.93	Kd=6.4uM	Kd	5.19	2004	phospholipase a2 isoform 3	AIN	P60045	C9H8O4	180.157	180.042	21	21	63.6	2.28	1.31	0	3	2	CC(=O)Oc1ccccc1C(=O)O	1	C228H79CaN55O65S7+4	valid	Ca
1oyn	general	Protein-Ligand	2	IC50=0.55uM	IC50	6.26	2003	camp-specific phosphodiesterase pde4d2	ROL	Q08499	C16H21NO3	275.343	275.152	41	43	47.56	2.21	2.95	1	1	4	COc1ccc(cc1OC1CCCC1)[C@H]1CNC(=O)C1	1	C326H114N83O93S6Zn2+5	train	Zn
1p6d	general	Protein-Ligand	2	Ki=1.15mM	Ki	2.94	2003	phospholipase c	3PC	P09598	C21H44NO7P	453.55	453.286	74	73	115.88	2.93	3.46	0	4	20	CCCCCC(=O)O[C@@H](CCP(OCC[N+](C)(C)C)(O)O)COC(=O)CCCCC	1	C321H95N81O94SZn3+6	test	Zn
1p6e	general	Protein-Ligand	2.3	Ki=1.21mM	Ki	2.92	2003	phospholipase c	PC5	P09598	C18H37NO6PS2	458.593	458.18	65	64	151.76	4.32	4.37	0	2	19	CCCCC(=O)O[C@@H](CO[P@@](=S)(OCC[N+](C)(C)C)S)COC(=O)CCCC	1	C273H86N71O87SZn3+5	valid	Zn
1pdz	refined	Protein-Ligand	2.2	Ki=0.2mM	Ki	3.7	1995	enolase	PGA	P56252	C2H6O6P	157.039	156.99	15	14	120.81	-1.24	-1.26	0	5	1	OC(=O)COP(O)(O)O	1	C206H90MnN62O76S2+5	valid	Mn
1ppw	general	Protein-Ligand	2.21	IC50=50uM	IC50	4.3	2004	isopentenyl diphosphate delta-isomerase	EIP	Q46822	C5H14O8P2	264.107	264.016	29	28	167.02	-2.64	-0.73	1	6	6	OC/C(=C/COP(OP(O)(O)O)(O)O)/C	1	C266H104MgMnN78O83S2+11	train	MgMn
1ppx	general	Protein-Ligand	NMR	Kd=52nM	Kd	7.28	2003	mutator mutt protein	8OG	P08337	C10H15N5O8P	364.229	364.066	39	41	222.53	-4.4	-2.1	4	6	4	O[C@H]1C[C@@H](O[C@@H]1COP(O)(O)O)n1c(=O)[nH]c2c1nc(N)[nH]c2=O	1	C215H72MgN56O56S+8	test	Mg
1pq3	general	Protein-Ligand	2.7	Ki=30nM	Ki	7.52	2003	arginase ii, mitochondrial precursor	S2C	P78540	C5H14BNO5S	211.044	211.069	27	26	150.93	-3.01	-2.67	4	5	8	OC(=O)[C@H](CSCC[B](O)(O)O)[NH3+]	1	C257H92Mn2N73O88+3	valid	Mn
1ps3	refined	Protein-Ligand	1.8	Ki=5.2mM	Ki	2.28	2003	alpha-mannosidase ii	KIF	Q24451	C8H12N2O6	232.191	232.07	28	29	130.33	-2.78	-4.01	5	6	5	OC[C@@H]1[C@@H](O)[C@H](O)[C@@H]([C@@H]2N1C(=O)C(=O)N2)O	1	C244H92N67O74Zn+6	test	Zn
1pun	general	Protein-Ligand	NMR	Kd=52nM	Kd	7.28	2003	mutator mutt protein	8OG	P08337	C10H15N5O8P	364.229	364.066	39	41	222.53	-4.4	-2.1	4	6	4	O[C@H]1C[C@@H](O[C@@H]1COP(O)(O)O)n1c(=O)[nH]c2c1nc(N)[nH]c2=O	1	C190H60MgN49O52S+6	valid	Mg
1puq	general	Protein-Ligand	NMR	Kd=52nM	Kd	7.28	2003	mutator mutt protein	8OG	P08337	C10H15N5O8P	364.229	364.066	39	41	222.53	-4.4	-2.1	4	6	4	O[C@H]1C[C@@H](O[C@@H]1COP(O)(O)O)n1c(=O)[nH]c2c1nc(N)[nH]c2=O	1	C228H73MgN54O61S2+4	test	Mg
1pus	general	Protein-Ligand	NMR	Kd=52nM	Kd	7.28	2003	mutator mutt protein	8OG	P08337	C10H15N5O8P	364.229	364.066	39	41	222.53	-4.4	-2.1	4	6	4	O[C@H]1C[C@@H](O[C@@H]1COP(O)(O)O)n1c(=O)[nH]c2c1nc(N)[nH]c2=O	1	C248H81MgN61O64S+5	train	Mg
1pwp	general	Protein-Ligand	2.9	Ki=0.5uM	Ki	6.3	2004	lethal factor	NSC	P15917	C21H20N6O	372.423	372.17	48	51	118.95	2.46	5.52	4	3	4	O=C(Nc1ccc2c(c1)c(N)cc(n2)C)Nc1ccc2c(c1)c(N)cc(n2)C	1	C294H104N75O95Zn+6	train	Zn
1pwu	general	Protein-Ligand	2.7	Ki=2.1uM	Ki	5.68	2004	lethal factor	GM6	P15917	C20H28N4O4	388.461	388.211	56	57	123.32	1.42	2.67	5	4	13	ONC(=O)C[C@H](C(=O)N[C@H](C(=O)NC)Cc1c[nH]c2c1cccc2)CC(C)C	1	C293H100N80O87SZn+9	train	Zn
1px4	refined	Protein-Ligand	1.6	Ki=0.59mM	Ki	3.23	2004	beta-galactosidase	IPT	P00722	C9H18O5S	238.301	238.087	33	33	115.45	-0.46	-1.07	4	4	7	OC[C@H]1O[C@@H](SC(C)C)[C@@H]([C@H]([C@H]1O)O)O	1	C258H111MgN78O83S7+6	train	Mg
1q1y	general	Protein-Ligand	1.9	IC50=0.02uM	IC50	7.7	2004	Peptide Deformylase from Staphylococcus aureus	BB2	P68826	C19H33N3O6	399.482	399.237	61	61	136.04	2.68	2.01	3	6	14	CCCCC[C@@H](C(=O)N[C@H](C(=O)N1CCC[C@H]1C(=O)O)C(C)C)CC(=O)NO	1	C307H104N77O83S4Zn+5	train	Zn
1q54	refined	Protein-Ligand	1.93	Ki=1.4uM	Ki	5.85	2003	isopentenyl diphosphate delta-isomerase	BHI	Q46822	C5H15BrO8P2	345.019	343.943	31	30	167.02	-2.21	-0.13	1	6	7	BrC[C@@](CCOP(OP(O)(O)O)(O)O)(O)C	1	C328H113MgMnN95O90S3+13	train	MgMn
1q91	refined	Protein-Ligand	1.6	Ki=70uM	Ki	4.15	2004	5(3)-deoxyribonucleotidase	DPB	Q9NPB1	C17H20N2O8P	411.323	411.096	48	51	156.83	-1.1	0.1	1	5	2	O=c1[nH]c(=O)n(cc1C)[C@H]1C[C@@H]2[C@H](O1)CO[C@@](O2)(c1ccccc1)P(O)(O)O	1	C274H98MgN67O77S4+6	train	Mg
1q9m	general	Protein-Ligand	2.3	IC50=0.33uM	IC50	6.48	2003	camp-specific phosphodiesterase pde4d2	ROL	Q08499	C16H21NO3	275.343	275.152	41	43	47.56	2.21	2.95	1	1	4	COc1ccc(cc1OC1CCCC1)[C@@H]1CNC(=O)C1	1	C357H119N92O97S5Zn2+9	train	Zn
1qbq	refined	Protein-Ligand	2.4	Ki=5nM	Ki	8.3	1999	protein farnesyltransferase	HFP	Q02293 Q04631	C15H28O4P	303.354	303.173	48	47	94.51	2.9	3.46	1	4	8	O[C@@H](P(O)(O)O)/C=C(/CC/C=C(/CCC=C(C)C)\C)\C	1	C337H113N85O86S5Zn+6	train	Zn
1qf0	refined	Protein-Ligand	2.2	Ki=42nM	Ki	7.38	1999	thermolysin	TI2	P00800	C27H28N2O5S	492.587	492.172	63	65	154.53	5.3	3.55	3	5	14	O=C([C@H](Cc1ccccc1)NC(=O)[C@H](Cc1ccccc1)S)N[C@H](C(=O)O)Cc1ccc(cc1)O	1	C304H115CaN77O103SZn+3	train	ZnCa
1qf1	refined	Protein-Ligand	2	Ki=48nM	Ki	7.32	1999	thermolysin	TI1	P00800	C19H28N2O4S	380.502	380.177	54	54	134.3	4.44	2.96	2	4	13	CCCCC[C@@H](C(=O)N[C@H](C(=O)N[C@H](C(=O)O)C)Cc1ccccc1)S	1	C297H111CaN76O98SZn+3	test	ZnCa
1qf2	refined	Protein-Ligand	2.06	Ki=1200nM	Ki	5.92	1999	thermolysin	TI3	P00800	C22H24N2O4S	412.502	412.146	53	55	125.51	3.91	2.79	1	4	9	S[C@H](C(=O)NCC(=O)N1[C@@H](CC[C@@H]1c1ccccc1)C(=O)O)Cc1ccccc1	1	C308H113CaN78O103SZn+3	test	ZnCa
1qf4	general	Protein-Ligand	2.2	IC50=0.665uM	IC50	6.18	1999	adenylosuccinate synthetase	RPD	P0A7D4	C13H24N3O13P	461.316	461.105	54	55	264.81	-6.49	-5.25	6	11	12	OC[N@@H+]([C@@H](C(=O)O)CCCN1C(=O)N[C@]2(C1=O)O[C@@H]([C@H]([C@H]2O)O)COP(O)(O)O)O	1	C363H127MgN119O111+12	train	Mg
1qf5	general	Protein-Ligand	2	IC50=0.043uM	IC50	7.37	1999	adenylosuccinate synthetase	RPL	P0A7D4	C13H24N3O13P	461.316	461.105	54	55	264.81	-6.49	-5.25	6	11	12	OC[N@@H+]([C@H](C(=O)O)CCCN1C(=O)N[C@]2(C1=O)O[C@@H]([C@H]([C@H]2O)O)COP(O)(O)O)O	1	C350H122MgN118O108+12	train	Mg
1qi0	general	Protein-Ligand	2.1	Ki=4.5mM	Ki	2.35	2000	endoglucanase 5a	CBI	O85465	C12H22O11	342.296	342.116	45	46	189.53	-4.73	-5.4	8	8	12	OC[C@H]1O[C@@H](O)[C@@H]([C@H]([C@@H]1O[C@@H]1O[C@H](CO)[C@H]([C@@H]([C@H]1O)O)O)O)O	1	C233H87CaN65O76+4	train	Ca
1qin	refined	Protein-Ligand	2	Ki=10nM	Ki	8	1999	lactoylglutathione lyase	GIP	Q04760	C17H22IN4O8S	569.348	569.02	53	53	226.28	-0.86	0.28	4	8	14	O=C(N[C@H](C(=O)NCC(=O)O)CSC(=O)N(c1ccc(cc1)I)O)CC[C@@H](C(=O)O)[NH3+]	1	C354H104N91O89S6Zn+11	train	Zn
1qji	refined	Protein-Ligand	2.14	Ki=14uM	Ki	4.85	2000	astacin	PKF	P07584	C37H54N5O9P	743.827	743.366	106	109	216.04	2.15	2.66	3	7	23	COC(=O)[C@@H]1CCCN1C(=O)[C@@H](CP([C@H](Cc1ccccc1)NC(=O)[C@@H](NC(=O)[C@@H]1CCCN1C(=O)OCc1ccccc1)CCCC[NH3+])(O)O)C	1	C401H121N104O117S5Zn+8	train	Zn
1qm4	general	Protein-Ligand	2.66	Ki=50uM	Ki	4.3	2000	methionine adenosyltransferase, alpha form	AMB	P13444	C5H10NO3	132.138	132.066	19	18	74.17	-2.05	-1.16	1	2	2	CO/C=C\[C@H]([NH3+])C(=O)O	1	C171H64Mg2N48O53+5	test	Mg
1qq9	general	Protein-Ligand	1.53	Ki=8.7mM	Ki	2.06	2000	aminopeptidase	MET	P80561	C5H12NO2S	150.219	150.059	21	20	90.24	-1.47	-0.57	1	2	3	CSCC[C@H]([NH3+])C(=O)O	1	C210H78N55O75SZn2+3	valid	Zn
1qs4	general	Protein-Ligand	2.1	IC50=2.3uM	IC50	5.64	1999	hiv-1 integrase	100	P12497	C12H8ClN5O2	289.677	289.037	28	30	104.39	1.76	1.79	2	5	4	Clc1ccc2c(c1)c(c[nH]2)C(=O)CC(=O)c1n[nH]nn1	1	C145H60MgN37O48S2+3	train	Mg
1qwu	general	Protein-Ligand	2.03	Ki=0.6mM	Ki	3.22	2003	alpha-mannosidase ii	GUL	Q24451	C6H11FO5	182.147	182.059	23	23	90.15	-1.81	-2.24	4	4	5	OC[C@]1(F)OC[C@H]([C@H]([C@@H]1O)O)O	1	C244H84N61O71SZn+4	train	Zn
1qx1	general	Protein-Ligand	1.3	Ki=7.5mM	Ki	2.12	2003	alpha-mannosidase ii	FMF	Q24451	C6H11FO4	166.148	166.064	22	22	69.92	-1.04	-1.56	3	3	4	OC[C@H]1OC[C@H]([C@H]([C@@H]1O)O)F	1	C238H86N58O70SZn+4	train	Zn
1qxl	refined	Protein-Ligand	2.25	Ki=11nM	Ki	7.96	2004	adenosine deaminase	FR8	P56658	C27H31N5O3	473.567	473.243	66	69	115.17	2.54	4.69	3	4	14	OC[C@H](n1cnc(c1)C(=O)N)CCn1ccc2c1cc(cc2)NC(=O)CCCCc1ccccc1	1	C372H124N94O99S6Zn+8	test	Zn
1qxw	general	Protein-Ligand	1.67	IC50=7uM	IC50	5.15	2004	methionine aminopeptidase	M1C	P0A078	C10H24N2O2	204.31	204.184	38	38	84.71	0.43	-1.81	4	2	9	CCCC[C@@H](C(C[NH2+]C1CC1)(O)O)[NH3+]	1	C290H104Co2N79O85S+5	train	XX
1qxy	general	Protein-Ligand	1.04	IC50=16uM	IC50	4.8	2004	methionine aminopeptidase	M2C	P0A078	C10H17N2O2S	229.319	229.101	32	32	106.29	-0.6	-0.42	3	3	7	CSCC[C@@H](C(c1ccccn1)(O)O)[NH3+]	1	C277H106Co3N75O84S+5	valid	XX
1qxz	general	Protein-Ligand	1.68	IC50=19uM	IC50	4.72	2004	methionine aminopeptidase	M3C	P0A078	C8H15N2O2S2	235.347	235.057	29	29	134.53	-0.5	-0.36	3	3	7	CSCC[C@@H](C(c1nccs1)(O)O)[NH3+]	1	C267H107Co3N72O82S+5	train	XX
1r0x	general	Protein-Ligand	2.2	Kd=149uM	Kd	3.83	2003	cystic fibrosis transmembrane conductance regulator	ATP	P26361	C10H19N5O13P3	510.205	510.019	50	52	329.38	-6.07	-2.36	3	12	9	O[C@@H]1[C@@H](COP(OP(OP(O)(O)O)(O)O)(O)O)O[C@H]([C@@H]1O)n1cnc2c1ncnc2N	1	C270H95MgN71O84S+7	valid	Mg
1r10	general	Protein-Ligand	3	Kd=149uM	Kd	3.83	2003	cystic fibrosis transmembrane conductance	ATP	P26361	C10H19N5O13P3	510.205	510.019	50	52	329.38	-6.07	-2.36	3	12	9	O[C@@H]1[C@@H](COP(OP(OP(O)(O)O)(O)O)(O)O)O[C@H]([C@@H]1O)n1cnc2c1ncnc2N	1	C259H89MgN63O78S+4	valid	Mg
1r17	general	Protein-Ligand	1.86	Kd=379nM	Kd	6.42	2003	fibrinogen-binding protein SdrG	16-mer	Q9KI13	C54H82N19O13	1205.35	1204.63	168	171	528.08	-2.32	-4.69	13	14	47	[NH3+]CC(=O)N[C@H](C(=O)N[C@H](C(=O)N[C@H](C(=O)N[C@H](C(=O)N[C@H](C(=O)N[C@H](C(=O)NCC(=O)N[C@H](C(=O)N[C@H](C(=O)N1CCC[C@H]1C(=O)O)CCC[NH+]=C(N)N)Cc1[nH]cnc1)CCC[NH+]=C(N)N)C)CO)Cc1ccccc1)Cc1ccccc1)C	1	C304H112CaN77O117S2+2	train	Ca
1r1h	refined	Protein-Ligand	1.95	Ki=1.2nM	Ki	8.92	2004	neprilysin	BIR	P08473	C21H29N2O5P	420.439	420.181	58	59	148.09	-0.14	1.91	2	5	9	C[C@@H](C(=O)O)NC(=O)[C@@H](CP([C@@H]([NH3+])C)(O)O)Cc1ccc(cc1)c1ccccc1	1	C396H122N96O101S2Zn+5	train	Zn
1r1i	general	Protein-Ligand	2.6	Ki=2.9nM	Ki	8.54	2004	neprilysin	TI1	P08473	C19H28N2O4S	380.502	380.177	54	54	134.3	4.44	2.96	2	4	13	CCCCC[C@H](C(=O)N[C@H](C(=O)N[C@H](C(=O)O)C)Cc1ccccc1)S	1	C331H110N88O92SZn+5	train	Zn
1r1j	refined	Protein-Ligand	2.35	Ki=2.3nM	Ki	8.64	2004	neprilysin	OIR	P08473	C21H24N2O4S	400.491	400.146	52	53	134.3	4.07	2.63	2	4	11	S[C@@H](C(=O)N[C@H](C(=O)N[C@H](C(=O)O)C)Cc1ccccc1)Cc1ccccc1	1	C315H103N82O88SZn+5	test	Zn
1r58	general	Protein-Ligand	1.9	IC50=0.11uM	IC50	6.96	2004	methionine aminopeptidase 2	AO5	P50579	C15H23ClN3O3S	360.879	360.115	46	46	131.37	1.65	1.39	4	3	11	CC(SCC[C@H]([C@@H](C(=O)NNC(=O)c1cccc(c1)Cl)O)[NH3+])C	1	C335H110Mn2N85O89S5+6	train	Mn
1r5g	general	Protein-Ligand	2	IC50=0.03uM	IC50	7.52	2004	methionine aminopeptidase 2	AO1	P50579	C19H27N2O2S	347.495	347.179	51	52	102.27	2.57	2.52	3	2	10	CCSCC[C@H]([C@@H](C(=O)N[C@H](c1cccc2c1cccc2)C)O)[NH3+]	1	C357H122Mn2N89O96S4+7	train	Mn
1r5h	general	Protein-Ligand	2.4	IC50=0.18uM	IC50	6.74	2004	methionine aminopeptidase 2	AO2	P50579	C17H28N3O2	306.423	306.218	50	51	89	3.93	1.84	4	2	8	O[C@@H]([C@@H](CC1CCCCC1)[NH3+])C(=O)NNc1ccc(cc1)C	1	C355H118Mn2N92O92S5+8	test	Mn
1rdi	general	Protein-Ligand	1.8	Ki=8.8mM	Ki	2.06	1996	mannose-binding protein-c	MFU	P08661	C7H14O5	178.183	178.084	26	26	79.15	-1.55	-1.54	3	3	4	CO[C@@H]1O[C@@H](C)[C@H]([C@H]([C@@H]1O)O)O	1	C115H46CaN29O37S	valid	Ca
1rdj	general	Protein-Ligand	1.8	Ki=21.7mM	Ki	1.66	1996	mannose-binding protein-c	MFB	P08661	C6H12O5	164.156	164.068	23	23	90.15	-2.09	-2.19	4	4	4	O[C@@H]1[C@H](C)O[C@@H]([C@H]([C@@H]1O)O)O	1	C123H44CaN31O40S	test	Ca
1rdl	general	Protein-Ligand	1.7	Ki=5.7mM	Ki	2.24	1996	mannose-binding protein-c	MMA	P08661	C6H12O6	180.156	180.063	24	24	110.38	-2.59	-3.22	5	5	6	OC[C@H]1O[C@H](O)[C@H]([C@H]([C@@H]1O)O)O	1	C122H40CaN32O41S	train	Ca
1rdn	general	Protein-Ligand	1.8	Ki=14.4mM	Ki	1.84	1996	mannose-binding protein-c	MAG	P08661	C8H15NO6	221.208	221.09	30	30	119.25	-2.59	-2.69	5	5	7	OC[C@H]1O[C@H](O)[C@@H]([C@H]([C@@H]1O)O)NC(=O)C	1	C145H44CaN37O48S2	train	Ca
1rin	general	Protein-Ligand	2.6	Kd=0.7mM	Kd	3.15	1993	retinol binding protein	MAN	P02867	C6H12O6	180.156	180.063	24	24	110.38	-2.59	-3.22	5	5	6	OC[C@H]1O[C@H](O)[C@H]([C@H]([C@@H]1O)O)O	1	C152H55CaN39O51+	valid	Ca
1rm8	general	Protein-Ligand	1.8	Ki=1nM	Ki	9	2004	mmp-16	BAT	P51512	C23H31N3O4S2	477.64	477.176	63	64	161.07	3.55	4.27	4	4	16	CNC(=O)[C@@H](NC(=O)[C@@H]([C@@H](C(=O)NO)CSc1cccs1)CC(C)C)Cc1ccccc1	1	C265H73CaN62O69S2Zn+4	train	ZnCa
1rmz	refined	Protein-Ligand	1.34	Kd=10nM	Kd	8	2004	Macrophage metalloelastase(F171D)	NGH	P39900	C13H20N2O5S	316.373	316.109	41	41	104.32	1.23	2.32	2	4	9	ONC(=O)CN(S(=O)(=O)c1ccc(cc1)OC)CC(C)C	1	C263H84CaN62O66SZn+5	train	ZnCa
1ro6	refined	Protein-Ligand	2	Ki=350nM	Ki	6.46	2004	camp-specific 3',5'-cyclic phosphodiesterase 4b	ROL	Q07343	C16H21NO3	275.343	275.152	41	43	47.56	2.21	2.95	1	1	4	COc1ccc(cc1OC1CCCC1)[C@@H]1CNC(=O)C1	1	C328H114MnN88O96S5Zn+7	test	ZnMn
1ros	general	Protein-Ligand	2	IC50=1.7nM	IC50	8.77	2004	macrophage metalloelastase (mmp-12)	DEO	P39900	C28H25NO6	471.501	471.168	60	63	100.98	5.27	4.65	0	5	9	CCOc1ccc(cc1)c1ccc(cc1)C(=O)C[C@@H](C(=O)O)CCN1C(=O)c2c(C1=O)cccc2	1	C281H94CaN72O76SZn+8	train	ZnCa
1rp7	refined	Protein-Ligand	2.09	Ki=0.003uM	Ki	8.52	2004	pyruvate dehydrogenase e1	TZD	P0AFG8	C12H20N4O8P2S	442.322	442.048	47	48	248.83	-2.2	0.42	1	8	7	Cc1ncc(c(n1)N)Cn1c(=O)sc(c1C)CCOP(OP(O)(O)O)(O)O	1	C406H150MgN108O126S5+6	train	Mg
1rql	refined	Protein-Ligand	2.4	Ki=1.79mM	Ki	2.75	2004	phosphonoacetaldehyde hydrolase	VSO	O31156	C2H6O3S	110.132	110.004	12	11	85.99	-0.32	1.35	0	3	0	C=CS(O)(O)O	1	C256H102MgN61O72S5+4	train	Mg
1ru1	general	Protein-Ligand	1.4	Kd=18uM	Kd	4.74	2004	6-hydroxymethyl-7,8-dihydropterin pyrophosphoki	APC	P26281	C11H21N5O12P3	508.232	508.04	52	54	320.15	-6.21	-2.25	3	12	9	O[C@@H]1[C@@H](COP(CP(OP(O)(O)O)(O)O)(O)O)O[C@H]([C@@H]1O)n1cnc2c1ncnc2N	1	C255H84Mg2N68O68S3+5	valid	Mg
1ru2	general	Protein-Ligand	1.48	Kd=0.32uM	Kd	6.49	2004	6-hydroxymethyl-7,8-dihydropterin pyrophosphoki	APC	P26281	C11H21N5O12P3	508.232	508.04	52	54	320.15	-6.21	-2.25	3	12	9	O[C@@H]1[C@@H](COP(CP(OP(O)(O)O)(O)O)(O)O)O[C@H]([C@@H]1O)n1cnc2c1ncnc2N	1	C259H84Mg2N68O69S3+4	train	Mg
1ryf	general	Protein-Ligand	1.75	Kd=1.6nM	Kd	8.8	2004	ras-related c3 botulinum toxin substrate 1	GDP	P63000	C10H17N5O11P2	445.216	445.04	45	47	286.07	-5.72	-2.75	4	9	7	O[C@@H]1[C@@H](COP(OP(O)(O)O)(O)O)O[C@H]([C@@H]1O)n1cnc2c1nc(N)[nH]c2=O	1	C203H74MgN52O64S2+4	train	Mg
1ryh	general	Protein-Ligand	1.75	Kd=27.6nM	Kd	7.56	2004	ras-related c3 botulinum toxin substrate 1	GNP	P63000	C10H20N6O13P3	525.219	525.03	52	54	352.15	-7.18	-3.11	5	11	9	O[C@@H]1[C@@H](COP(OP(NP(O)(O)O)(O)O)(O)O)O[C@H]([C@@H]1O)n1cnc2c1nc(N)[nH]c2=O	1	C243H88MgN61O75S3+4	test	Mg
1s63	general	Protein-Ligand	1.9	Ki=0.9nM	Ki	9.05	2004	protein farnesyltransferase	778	P49354 P49356	C22H21ClN5O	406.888	406.143	50	53	66.36	2.69	3.52	1	3	5	N#Cc1ccc(cc1)Cn1cncc1C[N@H+]1CCN(C(=O)C1)c1cccc(c1)Cl	1	C377H118N102O101S6Zn+6	test	Zn
1sln	refined	Protein-Ligand	2.27	Ki=0.23uM	Ki	6.64	1996	stromelysin-1	INH	P08254	C25H36N6O4	484.591	484.28	71	72	178.12	2.3	0.15	3	4	15	NC(=[NH+]CCC[C@@H](C(=O)Nc1ccccc1)NC(=O)[C@@H]([NH2+][C@@H](C(=O)O)C)CCc1ccccc1)N	1	C318H97CaN76O84SZn+5	train	ZnCa
1sm3	general	Protein-Ligand	1.95	Kd=24uM	Kd	4.62	1999	antibody fab fragment	13-mer	P15941 P01801 P01723	C38H64N12O12	880.988	880.477	126	128	374.68	-3.31	-4.59	7	12	29	O=C[C@@H]1CCCN1C(=O)[C@@H](NC(=O)[C@@H]1CCCN1C(=O)[C@@H](NC(=O)[C@H]([C@H](O)C)NC(=O)[C@@H](NC(=O)[C@@H]1CCCN1C(=O)[C@@H](NC(=O)[C@@H]([NH3+])C)C)CC(=O)O)CCC[NH+]=C(N)N)C	1	C306H81Cd2N86O79S+6	train	XX
1so2	general	Protein-Ligand	2.4	IC50=0.27nM	IC50	9.57	2004	cgmp-inhibited 3',5'-cyclic phosphodiesterase b	666	Q13370	C24H24IN3O2	513.371	513.091	54	57	70.56	4.31	4.65	2	2	5	O=C1NN=C([C@@H](C1)C)c1ccc(cc1)NC1=C(Cc2cccc(c2)I)C(=O)CCC1	1	C392H137Mg2N106O98S+12	train	Mg
1soj	general	Protein-Ligand	2.9	IC50=242nM	IC50	6.62	2004	cgmp-inhibited 3',5'-cyclic phosphodiesterase b	IBM	Q13370	C10H14N4O2	222.244	222.112	30	31	72.68	0.95	0.08	1	3	2	CC(Cn1c(=O)n(C)c(=O)c2c1[nH]cn2)C	1	C270H102Mg2N72O71S+7	valid	Mg
1t1s	general	Protein-Ligand	2.4	IC50=7uM	IC50	5.15	2004	1-deoxy-d-xylulose 5-phosphate reductoisomerase	CBQ	P45568	C6H11ClN2O6P2	304.562	303.978	28	28	173.48	-1.92	-0.02	1	7	2	Clc1ccc(nc1)NC(P(O)(O)O)P(O)(O)O	1	C244H91MgN73O83S4+5	test	Mg
1t3t	general	Protein-Ligand	1.9	Ki=11uM	Ki	4.96	2004	phosphoribosylformylglycinamidine synthase	ADP	P74881	C10H17N5O10P2	429.217	429.045	44	46	266.1	-4.89	-2.04	3	10	7	O[C@@H]1[C@@H](COP(OP(O)(O)O)(O)O)O[C@H]([C@@H]1O)n1cnc2c1ncnc2N	1	C355H137Mg3N96O103S5+7	train	Mg
1t4s	general	Protein-Ligand	2.8	Ki=3.6mM	Ki	2.44	2004	arginase 1	VAL	P07824	C5H12NO2	118.154	118.087	20	19	64.94	-1.15	-0.66	1	2	1	[NH3+][C@H](C(=O)O)C(C)C	1	C194H78Mn2N59O71+2	train	Mn
1t5a	general	Protein-Ligand	2.8	Ki=24uM	Ki	4.62	2005	pyruvate kinase, m2 isozyme	OXL	P14618	C2H2O4	90.035	89.995	8	7	74.6	1.52	-0.84	0	4	0	OC(=O)C(=O)O	1	C137H67MgN41O46S2+5	train	Mg
1t5f	refined	Protein-Ligand	2.2	Ki=60uM	Ki	4.22	2005	arginase 1	DHH	P07824	C7H16NO4	178.206	178.108	28	27	105.4	-2.26	-1.45	3	4	7	OC(CCCC[C@@H](C(=O)O)[NH3+])O	1	C233H85Mn2N67O85S2+2	train	Mn
1t69	general	Protein-Ligand	2.91	Ki=0.48uM	Ki	6.32	2004	human HDAC8	SHH	Q9BY41	C14H20N2O3	264.32	264.147	39	39	78.43	1.59	2.94	3	3	11	ONC(=O)CCCCCCC(=O)Nc1ccccc1	1	C273H81N73O79S4Zn+4	train	Zn
1td7	refined	Protein-Ligand	2.5	Kd=43uM	Kd	4.37	2004	phospholipase a2 isoform 3	NFL	P60045	C13H9F3N2O2	282.218	282.062	29	30	62.22	4.77	3.62	1	3	2	OC(=O)c1cccnc1Nc1cccc(c1)C(F)(F)F	1	C227H76CaN50O63S5+3	test	Ca
1tfz	general	Protein-Ligand	1.8	IC50=7nM	IC50	8.15	2004	4-hydroxyphenylpyruvate dioxygenase	869	P93836	C23H26N2O5S	442.528	442.156	57	59	101.49	3.2	3.95	0	4	6	COc1ccc(cc1)c1c(C)c(ccc1S(=O)(=O)C)C(=O)[C@@H]1C=NN(C1=O)C(C)(C)C	1	C359H122FeN90O98S+7	train	Fe
1tg5	general	Protein-Ligand	1.9	IC50=12nM	IC50	7.92	2004	4-hydroxyphenylpyruvate dioxygenase	645	P93836	C21H19Cl3N2O4S	501.811	500.013	50	52	97.64	5.78	6.69	1	5	6	Clc1ccc(c(c1)Cl)c1nn(c(c1C(=O)c1ccc(cc1Cl)S(=O)(=O)C)O)C(C)(C)C	1	C305H111FeN75O84S+5	train	Fe
1thl	general	Protein-Ligand	1.7	Ki=0.38uM	Ki	6.42	1994	thermolysin	0DB	P00800	C28H32N2O5	476.564	476.231	67	70	119.49	6.9	4.95	2	5	10	OC(=O)[C@@H](CC1(CCCC1)C(=O)N[C@H](C(=O)O)Cc1c[nH]c2c1cccc2)CCc1ccccc1	1	C287H106N75O94SZn+3	test	Zn
1tka	general	Protein-Ligand	2.7	Kd=0.8uM	Kd	6.1	1994	transketolase	N3T	P23254	C13H22N3O7P2S	426.342	426.065	48	49	218.87	-1.09	1.95	1	6	7	Cc1ncc(c(c1)N)Cn1csc(c1C)CCOP(OP(O)(O)O)(O)O	1	C413H153CaN117O124S4+8	train	Ca
1tkb	refined	Protein-Ligand	2.3	Ki=10nM	Ki	8	1994	transketolase	N1T	P23254	C13H22N3O7P2S	426.342	426.065	48	49	218.87	-0.76	1.95	1	6	7	Cc1ccc(c(n1)N)Cn1csc(c1C)CCOP(OP(O)(O)O)(O)O	1	C406H156CaN116O125S4+8	test	Ca
1tkc	general	Protein-Ligand	2.7	Kd=14uM	Kd	4.85	1994	transketolase	M6T	P23254	C13H23N4O7P2S	441.357	441.076	50	51	231.76	-1.01	1.65	1	7	7	Cc1nc(C)c(c(n1)N)Cn1csc(c1C)CCOP(OP(O)(O)O)(O)O	1	C410H156CaN119O124S4+9	test	Ca
1tl7	general	Protein-Ligand	2.8	Ki=12nM	Ki	7.92	2004	adenylate cyclase, type v	ONM	P04896 P26769 P30803	C18H26N6O15P3	659.352	659.067	68	71	367.45	-4.13	-1.09	4	11	12	CNc1ccccc1C(=O)O[C@@H]1[C@@H](COP(OP(OP(O)(O)O)(O)O)(O)O)O[C@H]([C@@H]1O)n1cnc2c1nc(N)[nH]c2=O	1	C330H120Mn2N86O98S4+6	valid	Mn
1tlp	refined	Protein-Ligand	2.3	Ki=28nM	Ki	7.55	1989	thermolysin	RDF	P00800	C23H35N3O10P	544.512	544.206	72	74	227.42	0.65	0.57	6	8	14	CC(C[C@@H](C(=O)N[C@H](C(=O)O)Cc1c[nH]c2c1cccc2)NP(O[C@@H]1O[C@@H](C)[C@@H]([C@H]([C@H]1O)O)O)(O)O)C	1	C274H96N72O90SZn+4	train	Zn
1tmm	general	Protein-Ligand	1.25	Kd=0.23uM	Kd	6.64	2005	6-hydroxymethyl-7,8-dihydropterin pyrophosphoki	APC	P26281	C11H21N5O12P3	508.232	508.04	52	54	320.15	-6.21	-2.25	3	12	9	O[C@@H]1[C@@H](COP(CP(OP(O)(O)O)(O)O)(O)O)O[C@H]([C@@H]1O)n1cnc2c1ncnc2N	1	C256H95Mg2N74O73S3+7	train	Mg
1tmn	refined	Protein-Ligand	1.9	Ki=50nM	Ki	7.3	1989	thermolysin	0ZN	P00800	C27H34N3O5	480.576	480.25	69	71	136.1	4.01	2.73	3	5	12	CC(C[C@@H](C(=O)N[C@H](C(=O)O)Cc1c[nH]c2c1cccc2)[NH2+][C@H](C(=O)O)CCc1ccccc1)C	1	C296H115CaN78O102SZn+3	train	ZnCa
1tpz	general	Protein-Ligand	2	Kd=0.64uM	Kd	6.19	2004	interferon-inducible gtpase	GDP	Q9QZ85	C10H17N5O11P2	445.216	445.04	45	47	286.07	-5.72	-2.75	4	9	7	O[C@@H]1[C@@H](COP(OP(O)(O)O)(O)O)O[C@H]([C@@H]1O)n1cnc2c1nc(N)[nH]c2=O	1	C199H74MgN53O71+4	train	Mg
1tq4	refined	Protein-Ligand	1.95	Kd=0.64uM	Kd	6.19	2004	interferon-inducible gtpase	GDP	Q9QZ85	C10H17N5O11P2	445.216	445.04	45	47	286.07	-5.72	-2.75	4	9	7	O[C@@H]1[C@@H](COP(OP(O)(O)O)(O)O)O[C@H]([C@@H]1O)n1cnc2c1nc(N)[nH]c2=O	1	C169H66MgN50O57S+7	train	Mg
1ttm	refined	Protein-Ligand	1.95	Kd=45nM	Kd	7.35	2004	carbonic anhydrase ii	667	P00918	C14H15NO5S	309.338	309.067	36	38	107.98	2.26	3.43	1	3	2	O=c1oc2cc(ccc2c2c1CCCCC2)OS(=O)(=O)N	1	C311H96N79O70S2Zn+6	valid	Zn
1txr	refined	Protein-Ligand	2	Ki=18nM	Ki	7.74	2004	bacterial leucyl aminopeptidase	BES	Q01693	C16H25N2O4	309.381	309.181	47	47	114.27	-0.08	0.21	3	4	9	O[C@@H]([C@@H](Cc1ccccc1)[NH3+])C(=O)N[C@H](C(=O)O)CC(C)C	1	C239H91N65O89S4Zn2+4	train	Zn
1u0h	general	Protein-Ligand	2.9	Ki=110nM	Ki	6.96	2004	adenylate cyclase, type v	ONM	P04896 P26769 P30803	C18H26N6O15P3	659.352	659.067	68	71	367.45	-4.13	-1.09	4	11	12	CNc1ccccc1C(=O)O[C@@H]1[C@@H](COP(OP(OP(O)(O)O)(O)O)(O)O)O[C@H]([C@@H]1O)n1cnc2c1nc(N)[nH]c2=O	1	C361H122Mg2N91O107S5+6	test	Mg
1u2r	general	Protein-Ligand	2.6	Kd=3.9uM	Kd	5.41	2004	elongation factor 2	GDP	P32324	C10H17N5O11P2	445.216	445.04	45	47	286.07	-5.72	-2.75	4	9	7	O[C@@H]1[C@@H](COP(OP(O)(O)O)(O)O)O[C@H]([C@@H]1O)n1cnc2c1nc(N)[nH]c2=O	1	C182H67MgN54O56+6	train	Mg
1u32	general	Protein-Ligand	2	IC50=97nM	IC50	7.01	2004	serine/threonine protein phosphatase pp1-gamma	OKA	P36873	C44H68O13	805.003	804.466	125	131	182.83	4.29	5.21	4	6	13	CC1=C[C@]2(O[C@@H](C1)[C@@H](/C=C\[C@H]1CC[C@]3(O1)CC[C@@H]1[C@@H](O3)[C@H](O)C(=C)[C@H](O1)[C@H](C[C@@H]([C@H]1O[C@@]3(CCCCO3)CC[C@H]1C)C)O)C)O[C@@H](CC[C@H]2O)C[C@](C(=O)O)(O)C	1	C295H106Mn2N90O96S2+8	test	Mn
1ucn	refined	Protein-Ligand	2	Kd=6.0uM	Kd	5.22	2003	nucleoside diphosphate kinase	ADP	P15531	C10H17N5O10P2	429.217	429.045	44	46	266.1	-4.89	-2.04	3	10	7	O[C@@H]1[C@@H](COP(OP(O)(O)O)(O)O)O[C@H]([C@@H]1O)n1cnc2c1ncnc2N	1	C218H75CaN66O67S2+7	test	Ca
1udt	general	Protein-Ligand	2.3	Kd=0.5nM	Kd	9.3	2004	cgmp-specific 3',5'-cyclic phosphodiesterase	VIA	O76074	C22H31N6O4S	475.584	475.213	64	67	123	1.48	2.78	2	4	7	CCCc1nn(c2c1nc([nH]c2=O)c1cc(ccc1OCC)S(=O)(=O)N1CC[NH+](CC1)C)C	1	C342H123MgN88O95S5Zn+8	train	ZnMg
1ugp	general	Protein-Ligand	1.63	Ki=1.3mM	Ki	2.89	2004	nitrile hydratase alpha subunit	BUA	Q7SID2 Q7SID3	C4H8O2	88.105	88.052	14	13	37.3	2.06	0.87	0	2	1	CCCC(=O)O	1	C246H94CoN56O59S5+4	train	XX
1uho	refined	Protein-Ligand	2.5	Kd=0.6nM	Kd	9.22	2004	cgmp-specific 3',5'-cyclic phosphodiesterase	VDN	O76074	C23H34N6O4S	490.619	490.236	68	71	125.38	2.64	3.46	3	3	8	CCOc1ccc(cc1c1[nH]c(=O)c2n(n1)c(CCC)[nH]c2C)S(=O)(=O)N1CC[NH+](CC1)CC	1	C344H128MgN92O96S5Zn+8	train	ZnMg
1uml	refined	Protein-Ligand	2.5	Ki=30nM	Ki	7.52	2004	adenosine deaminase	FR4	P56658	C25H27N5O3	445.514	445.211	60	63	115.17	1.64	3.91	3	4	12	OC[C@H](n1cnc(c1)C(=O)N)CCn1ccc2c1cc(cc2)NC(=O)CCc1ccccc1	1	C358H122N91O97S6Zn+7	train	Zn
1usn	refined	Protein-Ligand	1.8	Ki=0.018uM	Ki	7.74	1998	stromelysin-1	IN9	P08254	C13H10F5N5O2S2	427.373	427.02	37	38	163.05	2.03	2.86	3	4	9	CNC(=O)[C@H](Cc1c(F)c(F)c(c(c1F)F)F)NC(=O)Nc1nnc(s1)S	1	C254H78N62O58SZn2+5	train	Zn
1utz	general	Protein-Ligand	2.5	IC50=1.4uM	IC50	5.85	2004	macrophage metalloelastase (mmp-12)	PF3	P39900	C25H20N2O3S	428.503	428.119	51	54	107.53	5.86	5.81	1	4	7	OC(=O)C[C@H](c1ccccc1)NC(=O)c1scc(c1)c1ccc(cc1)c1ccncc1	1	C334H114CaN88O91S2Zn2+11	valid	ZnCa
1ux7	general	Protein-Ligand	1.5	Kd=1mM	Kd	3	2004	endo-1,4-beta-xylanase d	3-mer	P45796	C11H20O9	296.271	296.111	40	41	138.07	-3.51	-3.46	5	5	8	CO[C@@H]1OC[C@H]([C@@H]([C@H]1O)O)O[C@@H]1OC[C@H]([C@@H]([C@H]1O)O)O	1	C113H43CaN28O43	train	Ca
1uze	general	Protein-Ligand	1.82	IC50=1.27nM	IC50	8.9	2004	HUMAN TESTICULAR ANGIOTENSIN I-CONVERTING ENZYME	EAL	P12821	C18H23N2O5	347.386	347.161	48	49	111.52	1.18	-0.19	1	5	7	OC(=O)[C@@H]([NH2+][C@H](C(=O)N1CC=C[C@H]1C(=O)O)C)CCc1ccccc1	1	C360H120N91O91S3Zn+8	train	Zn
1v11	refined	Protein-Ligand	1.95	Kd=104.8uM	Kd	3.98	2004	2-oxoisovalerate dehydrogenase	TDP	P12694 P21953	C12H21N4O7P2S	427.33	427.061	47	48	231.76	-1.41	1.34	1	7	7	Cc1ncc(c(n1)N)Cn1csc(c1C)CCOP(OP(O)(O)O)(O)O	1	C355H135MnN87O112S4+4	valid	Mn
1v16	refined	Protein-Ligand	1.9	Kd=134.8uM	Kd	3.87	2004	2-oxoisovalerate dehydrogenase	TDP	P12694 P21953	C12H21N4O7P2S	427.33	427.061	47	48	231.76	-1.41	1.34	1	7	7	Cc1ncc(c(n1)N)Cn1csc(c1C)CCOP(OP(O)(O)O)(O)O	1	C399H146MnN102O128S4+6	test	Mn
1v1m	refined	Protein-Ligand	2	Kd=115.0uM	Kd	3.94	2004	2-oxoisovalerate dehydrogenase	TDP	P12694 P21953	C12H21N4O7P2S	427.33	427.061	47	48	231.76	-1.41	1.34	1	7	7	Cc1ncc(c(n1)N)Cn1csc(c1C)CCOP(OP(O)(O)O)(O)O	1	C384H148MnN101O126S4+6	train	Mn
1v79	general	Protein-Ligand	2.5	Ki=13nM	Ki	7.89	2004	adenosine deaminase	FR7	P56658	C15H17Cl2N3O2	342.22	341.07	39	40	81.14	2.51	3.54	2	3	7	C[C@@H]([C@H](n1cnc(c1)C(=O)N)CCc1cccc(c1Cl)Cl)O	1	C329H111N83O85S6Zn+8	train	Zn
1v7a	refined	Protein-Ligand	2.5	Ki=9.8nM	Ki	8.01	2004	adenosine deaminase	FRC	P56658	C19H21N3O3	339.388	339.158	46	48	90.37	2.21	3.23	2	3	8	C[C@@H]([C@H](n1cnc(c1)C(=O)N)CCOc1ccc2c(c1)cccc2)O	1	C326H122N83O85S6Zn+7	train	Zn
1w22	general	Protein-Ligand	2.5	IC50=175.5nM	IC50	6.76	2004	histone deacetylase 8	NHB	Q9BY41	C17H15N3O4S2	389.449	389.05	41	43	136.22	2.06	4.23	2	5	7	ONC(=O)c1ccc(cc1)N(S(=O)(=O)c1ccc(s1)c1ccccn1)C	1	C214H68N58O62S3Zn+2	train	Zn
1w31	general	Protein-Ligand	1.9	Ki=0.25mM	Ki	3.6	2005	aminolevulinic acid dehydratase	SHO	P05373	C5H10O3	118.131	118.063	18	17	57.53	1.2	0.23	1	3	4	OCCCCC(=O)O	1	C251H86N62O67S5Zn+5	train	Zn
1wc1	refined	Protein-Ligand	1.93	Ki=0.1mM	Ki	4	2004	adenylate cyclase	TAT	O32393	C10H17N5O12P3S	524.255	523.981	48	50	358.63	-4.34	-0.72	3	11	9	O[C@@H]1[C@@H](CO[P@](=S)(=O)OP(OP(O)(O)O)(O)O)O[C@H]([C@@H]1O)n1cnc2c1ncnc2N	1	C296H109Mg4N87O82S4+10	train	Mg
1wc6	general	Protein-Ligand	2.51	Ki=0.1mM	Ki	4	2004	adenylate cyclase	TAT	O32393	C10H18N5O12P3S	525.263	524.989	49	51	341.01	-5.01	-0.99	3	11	10	O[C@@H]1[C@@H](CO[P@](=O)(OP(OP(O)(O)O)(O)O)S)O[C@H]([C@@H]1O)n1cnc2c1ncnc2N	1	C401H137Mg4N109O106S3+10	test	Mg
1we2	general	Protein-Ligand	2.3	Kd=44uM	Kd	4.36	2005	shikimate kinase	DHK	P9WPY3	C7H10O5	174.151	174.053	22	22	97.99	-0.81	-1.52	3	5	3	O[C@@H]1CC(=C[C@H]([C@H]1O)O)C(=O)O	1	C201H76MgN53O61+4	train	Mg
1wkm	general	Protein-Ligand	2.3	Ki=150mM	Ki	0.82	2005	methionine aminopeptidase	MET	P56218	C5H12NO2S	150.219	150.059	21	20	90.24	-1.47	-0.57	1	2	3	CSCC[C@H]([NH3+])C(=O)O	1	C281H90Mn2N63O72S+3	train	Mn
1wn6	refined	Protein-Ligand	1.8	Ki=21uM	Ki	4.68	2005	BSD	BST	P0C2P0	C17H31N8O6	443.478	443.237	62	63	238.53	-3.78	-3.37	5	5	9	[NH3+][C@H](CC(=O)N[C@H]1C=C[C@@H](O[C@@H]1C(=O)O)N1C=C[C@](NC1=O)(O)[NH3+])CC[N+](=C(N)N)C	1	C313H94N81O88S3Zn+3	train	Zn
1ws1	refined	Protein-Ligand	2	Ki=0.28nM	Ki	9.55	2005	peptide deformylase 1	BB2	Q819U0	C19H33N3O6	399.482	399.237	61	61	136.04	2.68	2.01	3	6	14	CCCCC[C@@H](C(=O)N[C@H](C(=O)N1CCC[C@H]1C(=O)O)C(C)C)CC(=O)NO	1	C268H84N69NiO70S3+5	train	XX
1wu1	general	Protein-Ligand	2.3	IC50=18nM	IC50	7.74	2005	coagulation factor x, heavy chain	D91	P00742	C22H19ClN6O3S	482.943	482.093	52	56	120.53	2.26	3.78	1	6	5	Clc1ccc2c(c1)cc([nH]2)S(=O)(=O)N1CCN(CC1)C(=O)c1ncc(cn1)c1ccncc1	1	C294H110CaN78O91S6+7	train	Ca
1wuq	refined	Protein-Ligand	2	Ki=0.0054uM	Ki	8.27	2005	GTP cyclohydrolase I	8GT	Q5SH52	C10H19N5O15P3	542.204	542.009	52	54	374.57	-5.91	-6.39	2	11	9	O[C@@H]1[C@@H](COP(OP(OP(O)(O)O)(O)O)(O)O)O[C@H]([C@@H]1O)[N]1=c2[nH]c(N)[nH+]c(=O)c2=NC1=O	1	C303H96N87O77S5Zn+10	train	Zn
1wur	refined	Protein-Ligand	1.82	Ki=0.22uM	Ki	6.66	2005	GTP cyclohydrolase I	8DG	Q5SH52	C10H18N5O14P3	525.196	525.006	50	52	341.62	-4.85	-4.22	1	10	8	O[C@H]1C[C@@H](O[C@@H]1COP(OP(OP(O)(O)O)(O)O)(O)O)N1C(=O)N=C2C1=NC(=[NH+]C2=O)N	1	C346H112N93O88S6Zn+11	train	Zn
1wva	general	Protein-Ligand	1.94	Kd=270nM	Kd	6.57	2005	arginase 1	S2C	P05089	C5H14BNO5S	211.044	211.069	27	26	150.93	-3.01	-2.67	4	5	8	OC(=O)[C@H](CSCC[B](O)(O)O)[NH3+]	1	C247H87Mn2N73O85S+4	train	Mn
1wvc	general	Protein-Ligand	2.5	Ki=35uM	Ki	4.46	2005	glucose-1-phosphate cytidylyltransferase	CTP	Q8Z5I4	C9H19N3O14P3	486.18	486.008	48	49	320.67	-6.79	-2.95	3	10	9	O[C@@H]1[C@@H](COP(OP(OP(O)(O)O)(O)O)(O)O)O[C@H]([C@@H]1O)n1ccc(nc1=O)N	1	C290H105Mg2N76O88S3+5	valid	Mg
1wxz	general	Protein-Ligand	2.8	IC50=8.6nM	IC50	8.07	2005	adenosine deaminase	FRL	P56658	C22H21ClN4O3	424.88	424.13	51	54	107.17	3.38	4.7	2	4	8	C[C@@H]([C@@H](n1cnc(c1)C(=O)N)CCc1cccc2c1oc(n2)c1ccc(cc1)Cl)O	1	C360H132N95O101S6Zn+8	train	Zn
1x07	general	Protein-Ligand	2.2	Kd=520uM	Kd	3.28	2005	undecaprenyl pyrophosphate synthetase	IPE	P60472	C5H14O7P2	248.108	248.021	28	27	146.79	-1.39	0.3	0	5	4	CC(=CCOP(OP(O)(O)O)(O)O)C	1	C253H81MgN74O69S+6	train	Mg
1x8b	general	Protein-Ligand	1.81	IC50=97nM	IC50	7.01	2005	kinase domain of human Wee1-like protein kinase	824	P30291	C20H12N2O3	328.321	328.085	37	41	82.79	2.45	2.61	2	3	1	O=C1C=Cc2c(C1)c1c([nH]2)cc(c2c1c(=O)[nH]c2=O)c1ccccc1	1	C270H81MgN74O77S2+7	train	Mg
1x9d	general	Protein-Ligand	1.41	Kd=110uM	Kd	3.96	2005	mannosyl-oligosaccharide 1,2-alpha-mannosidase	SMD	Q9UKM7	C13H24O10S	372.389	372.109	48	49	194.6	-2.85	-4.03	7	7	12	CO[C@H]1O[C@H](CO)[C@H]([C@@H]([C@@H]1S[C@H]1O[C@H](CO)[C@H]([C@@H]([C@@H]1O)O)O)O)O	1	C323H129CaN82O101S2+8	train	Ca
1xge	general	Protein-Ligand	1.9	Kd=20.8uM	Kd	4.68	2005	dihydroorotase	DOR	P05020	C5H6N2O4	158.112	158.033	17	17	95.5	-0.63	-0.67	2	4	0	O=C1NC(=O)N[C@@H](C1)C(=O)O	1	C206H87N61O59S4Zn2+5	train	Zn
1xlx	general	Protein-Ligand	2.19	IC50=0.025uM	IC50	7.6	2004	camp-specific 3',5'-cyclic phosphodiesterase 4b	CIO	Q07343	C20H25NO4	343.417	343.178	50	52	79.55	4.58	4.05	0	3	4	N#C[C@@]1(CC[C@@H](CC1)C(=O)O)c1ccc(c(c1)OC1CCCC1)OC	1	C369H128MgN98O108S5Zn+8	train	ZnMg
1xlz	general	Protein-Ligand	2.06	IC50=0.96uM	IC50	6.02	2004	camp-specific 3',5'-cyclic phosphodiesterase 4b	FIL	Q07343	C15H23N2O4	295.354	295.166	44	45	87.39	2.41	2.35	2	1	7	COc1ccc(cc1OC1CCCC1)[C@H]([NH2+]OC(=O)N)C	1	C362H124MgN95O100S5Zn+9	train	ZnMg
1xm4	general	Protein-Ligand	2.31	IC50=0.041nM	IC50	10.39	2004	camp-specific 3',5'-cyclic phosphodiesterase 4b	PIL	Q07343	C18H18Cl2N2O3	381.253	380.069	43	45	60.45	4.15	5.04	1	2	6	COc1ccc(cc1OC1CCCC1)C(=O)Nc1c(Cl)cncc1Cl	1	C363H127MgN99O106S4Zn+10	valid	ZnMg
1xm6	general	Protein-Ligand	1.92	IC50=0.42uM	IC50	6.38	2004	camp-specific 3',5'-cyclic phosphodiesterase 4b	5RM	Q07343	C14H19NO4	265.305	265.131	38	39	56.79	2.27	2.77	1	1	5	CCCOc1cc(ccc1OC)[C@]1(C)CNC(=O)O1	1	C355H127MgN94O103S4Zn+8	train	ZnMg
1xmu	general	Protein-Ligand	2.3	IC50=0.84nM	IC50	9.08	2004	camp-specific 3',5'-cyclic phosphodiesterase 4b	ROF	Q07343	C17H14Cl2F2N2O3	403.207	402.035	40	42	60.45	4.58	5.1	1	2	8	FC(Oc1ccc(cc1OCC1CC1)C(=O)Nc1c(Cl)cncc1Cl)F	1	C366H121MgN98O104S4Zn+9	train	ZnMg
1xmy	general	Protein-Ligand	2.4	IC50=50.12nM	IC50	7.3	2004	Catalytic Domain Of Human Phosphodiesterase 4B	ROL	Q07343	C16H21NO3	275.343	275.152	41	43	47.56	2.21	2.95	1	1	4	COc1ccc(cc1OC1CCCC1)[C@@H]1CNC(=O)C1	1	C353H120MgN95O98S5Zn+9	test	ZnMg
1xn0	general	Protein-Ligand	2.31	IC50=0.57uM	IC50	6.24	2004	camp-specific 3',5'-cyclic phosphodiesterase 4b	ROL	Q07343	C16H21NO3	275.343	275.152	41	43	47.56	2.21	2.95	1	1	4	COc1ccc(cc1OC1CCCC1)[C@H]1CNC(=O)C1	1	C316H115MgN82O91S3Zn+6	train	ZnMg
1xnz	general	Protein-Ligand	1.52	IC50=0.24uM	IC50	6.62	2004	methionine aminopeptidase	FCD	P0AE18	C11H7ClO3	222.624	222.008	22	23	50.44	3.92	3.3	0	2	1	Clc1ccccc1c1ccc(o1)C(=O)O	1	C219H88Mn2N59O68S5+6	train	Mn
1xom	general	Protein-Ligand	1.55	IC50=0.011uM	IC50	7.96	2004	camp-specific 3',5'-cyclic phosphodiesterase 4d	CIO	Q08499	C20H25NO4	343.417	343.178	50	52	79.55	4.58	4.05	0	3	4	N#C[C@@]1(CC[C@@H](CC1)C(=O)O)c1ccc(c(c1)OC1CCCC1)OC	1	C339H117MgN86O94S6Zn+7	train	ZnMg
1xon	general	Protein-Ligand	1.72	IC50=0.021nM	IC50	10.68	2004	camp-specific 3',5'-cyclic phosphodiesterase 4d	PIL	Q08499	C18H18Cl2N2O3	381.253	380.069	43	45	60.45	4.15	5.04	1	2	6	COc1ccc(cc1OC1CCCC1)C(=O)Nc1c(Cl)cncc1Cl	1	C377H126MgN101O107S5Zn+9	train	ZnMg
1xoq	general	Protein-Ligand	1.83	IC50=0.68nM	IC50	9.17	2004	camp-specific 3',5'-cyclic phosphodiesterase 4d	ROF	Q08499	C17H14Cl2F2N2O3	403.207	402.035	40	42	60.45	4.58	5.1	1	2	8	FC(Oc1ccc(cc1OCC1CC1)C(=O)Nc1c(Cl)cncc1Cl)F	1	C389H132MgN103O109S5Zn+9	valid	ZnMg
1xor	general	Protein-Ligand	1.54	IC50=0.39uM	IC50	6.41	2004	camp-specific 3',5'-cyclic phosphodiesterase 4d	ZAR	Q08499	C12H10F2N2O3	268.216	268.066	29	30	64.21	2.15	2.05	1	1	4	COc1cc(ccc1OC(F)F)c1ccc(=O)[nH]n1	1	C281H110MgN74O76S4Zn+5	train	ZnMg
1xos	general	Protein-Ligand	2.28	IC50=20uM	IC50	4.7	2004	camp-specific 3',5'-cyclic phosphodiesterase 4b	VIA	Q07343	C22H31N6O4S	475.584	475.213	64	67	123	1.48	2.78	2	4	7	CCCc1nn(c2c1nc([nH]c2=O)c1cc(ccc1OCC)S(=O)(=O)N1CC[NH+](CC1)C)C	1	C365H132MgN96O109S3Zn+8	valid	ZnMg
1xot	general	Protein-Ligand	2.34	IC50=3.8uM	IC50	5.42	2004	camp-specific 3',5'-cyclic phosphodiesterase 4b	VDN	Q07343	C23H34N6O4S	490.619	490.236	68	71	125.38	2.64	3.46	3	3	8	CCOc1ccc(cc1c1[nH]c(=O)c2n(n1)c(CCC)[nH]c2C)S(=O)(=O)N1CC[NH+](CC1)CC	1	C407H132MgN108O118S5Zn+9	valid	ZnMg
1xp0	general	Protein-Ligand	1.79	IC50=1.0nM	IC50	9	2004	cgmp-specific 3',5'-cyclic phosphodiesterase	VDN	O76074	C23H34N6O4S	490.619	490.236	68	71	125.38	2.64	3.46	3	3	8	CCOc1ccc(cc1c1[nH]c(=O)c2n(n1)c(CCC)[nH]c2C)S(=O)(=O)N1CC[NH+](CC1)CC	1	C332H121MgN89O89S4Zn+9	test	ZnMg
1xpz	refined	Protein-Ligand	2.02	Kd=84nM	Kd	7.08	2005	carbonic anhydrase ii	4TZ	P00918	C16H14N6O3S	370.386	370.085	40	42	135.51	1.62	2.98	1	5	6	N#Cc1ccc(cc1)N(n1cnnc1)Cc1ccc(cc1)OS(=O)(=O)N	1	C315H102N82O68SZn+7	test	Zn
1xq0	refined	Protein-Ligand	1.76	Kd=454nM	Kd	6.34	2005	carbonic anhydrase ii	4TR	P00918	C16H13BrN6O3S	449.282	447.995	40	42	135.51	2.31	3.75	1	5	6	N#Cc1ccc(cc1)N(n1cnnc1)Cc1ccc(c(c1)Br)OS(=O)(=O)N	1	C324H99N84O70SZn+7	train	Zn
1xuc	general	Protein-Ligand	1.7	IC50=72nM	IC50	7.14	2005	collagenase 3 (mmp-13)	PB3	P45452	C22H22N4O2	374.436	374.174	50	52	83.98	3.14	3.74	2	4	8	Cc1cccc(c1)CNC(=O)c1ncnc(c1)C(=O)NCc1cccc(c1)C	1	C286H83N68O75S2Zn+6	valid	Zn
1xud	general	Protein-Ligand	1.8	IC50=8nM	IC50	8.1	2005	collagenase 3 (mmp-13)	PB4	P45452	C22H20F2N4O2	410.417	410.155	50	52	83.98	3.34	4.01	2	4	8	O=C(c1ncnc(c1)C(=O)NCc1ccc(c(c1)C)F)NCc1ccc(c(c1)C)F	1	C289H84N69O76S2Zn+6	train	Zn
1xug	refined	Protein-Ligand	1.5	Ki=0.09uM	Ki	7.05	1998	trypsin	BAB	P00760	C17H18N8	334.378	334.165	43	46	160.58	4.62	-0.64	2	2	4	NC(=[NH2+])c1ccc2c(c1)[nH]c(n2)Cc1nc2c([nH]1)cc(cc2)C(=[NH2+])N	1	C238H88N66O78S6Zn+4	valid	Zn
1xur	general	Protein-Ligand	1.85	IC50=6600nM	IC50	5.18	2005	collagenase 3 (mmp-13)	PB5	P45452	C18H16N6O2	348.359	348.133	42	44	109.76	0.27	1.91	2	6	8	O=C(c1ncnc(c1)C(=O)NCc1cccnc1)NCc1cccnc1	1	C281H84N67O74S2Zn+7	test	Zn
1xxe	general	Protein-Ligand	NMR	Ki=3.9uM	Ki	5.41	2004	udp-3-o-[3-hydroxymyristoyl] n-acetylglucosamin	TUX	O67648	C22H41NO7	431.563	431.288	71	71	125.32	4.38	3.25	4	5	21	CCCCCCCCCCCCCC(=O)O[C@@H]1[C@H](CO[C@@H]([C@H]1O)CO)CC(=O)NO	1	C319H103N94O90SZn+11	valid	Zn
1xz8	general	Protein-Ligand	2.8	Kd=30uM	Kd	4.52	2005	pyrr bifunctional protein	U5P	P41007	C9H14N2O9P	325.189	325.044	35	36	188.06	-4.11	-3.17	3	7	5	O[C@@H]1[C@H](O)[C@H](O[C@H]1n1ccc(=O)[nH]c1=O)COP(O)(O)O	1	C254H87MgN71O73+7	train	Mg
1y2b	general	Protein-Ligand	1.4	IC50=82uM	IC50	4.09	2005	camp-specific 3',5'-cyclic phosphodiesterase 4d	DEE	Q08499	C8H12N2O2	168.193	168.09	24	24	54.98	1.24	1.2	1	2	3	CCOC(=O)c1c(C)n[nH]c1C	1	C269H100MgN70O72S4Zn+5	train	ZnMg
1y2c	general	Protein-Ligand	1.67	IC50=0.27uM	IC50	6.57	2005	camp-specific 3',5'-cyclic phosphodiesterase 4d	3DE	Q08499	C14H16N2O2	244.289	244.121	34	35	44.12	2.91	2.67	0	2	4	CCOC(=O)c1c(C)nn(c1C)c1ccccc1	1	C328H119MgN91O93S4Zn+7	test	ZnMg
1y2d	general	Protein-Ligand	1.7	IC50=2.0uM	IC50	5.7	2005	camp-specific 3',5'-cyclic phosphodiesterase 4d	4DE	Q08499	C15H18N2O3	274.315	274.132	38	39	53.35	2.88	2.67	0	2	5	CCOC(=O)c1c(C)nn(c1C)c1ccc(cc1)OC	1	C346H123MgN95O94S3Zn+8	test	ZnMg
1y2e	general	Protein-Ligand	2.1	IC50=0.16uM	IC50	6.8	2005	camp-specific 3',5'-cyclic phosphodiesterase 4d	5DE	Q08499	C14H17N3O2	259.304	259.132	36	37	70.14	2.23	2.83	1	2	4	CCOC(=O)c1c(C)nn(c1C)c1ccc(cc1)N	1	C324H118MgN88O91S5Zn+8	test	ZnMg
1y2h	general	Protein-Ligand	2.4	IC50=0.056uM	IC50	7.25	2005	camp-specific 3',5'-cyclic phosphodiesterase 4b	6DE	Q07343	C14H15ClN2O2	278.734	278.082	34	35	44.12	3.54	3.32	0	2	4	CCOC(=O)c1c(C)nn(c1C)c1ccccc1Cl	1	C333H121MgN88O90S4Zn+7	test	ZnMg
1y2j	general	Protein-Ligand	2.55	IC50=0.033uM	IC50	7.48	2005	camp-specific 3',5'-cyclic phosphodiesterase 4b	7DE	Q07343	C14H15N3O4	289.287	289.106	36	37	89.94	2.74	3.1	0	4	4	CCOC(=O)c1c(C)nn(c1C)c1cccc(c1)N(=O)=O	1	C343H123MgN94O96S4Zn+8	test	ZnMg
1y2k	general	Protein-Ligand	1.36	IC50=0.021uM	IC50	7.68	2005	camp-specific 3',5'-cyclic phosphodiesterase 4d	7DE	Q08499	C14H15N3O4	289.287	289.106	36	37	89.94	2.74	3.1	0	4	4	CCOC(=O)c1c(C)nn(c1C)c1cccc(c1)N(=O)=O	1	C333H125MgN86O92S5Zn+6	valid	ZnMg
1y3g	general	Protein-Ligand	2.1	Ki=40nM	Ki	7.4	2006	thermolysin	3-mer	P00800	C23H38N2O6Si	466.643	466.25	70	70	135.96	4.01	3.18	4	6	17	CC(C[C@@H](C(=O)N[C@H](C(=O)O)CC(C)C)C[Si](CNC(=O)CCc1ccccc1)(O)O)C	1	C311H109CaN81O104SZn+4	test	ZnCa
1y8o	general	Protein-Ligand	2.48	Kd=1.30uM	Kd	5.89	2005	pyruvate dehydrogenase [lipoamide] kinase	ADP	Q15120 P10515	C10H17N5O10P2	429.217	429.045	44	46	266.1	-4.89	-2.04	3	10	7	O[C@@H]1[C@@H](COP(OP(O)(O)O)(O)O)O[C@H]([C@@H]1O)n1cnc2c1ncnc2N	1	C245H72MgN57O67S+5	train	Mg
1y8p	general	Protein-Ligand	2.63	Kd=0.84uM	Kd	6.08	2005	pyruvate dehydrogenase [lipoamide] kinase	ATP	Q15120 P10515	C10H19N5O13P3	510.205	510.019	50	52	329.38	-6.07	-2.36	3	12	9	O[C@@H]1[C@@H](COP(OP(OP(O)(O)O)(O)O)(O)O)O[C@H]([C@@H]1O)n1cnc2c1ncnc2N	1	C333H95MgN86O87S3+10	train	Mg
1yci	general	Protein-Ligand	2.7	Ki=83uM	Ki	4.08	2005	hypoxia-inducible factor 1 alpha inhibitor	NDF	Q9NWT6	C11H11NO5	237.209	237.064	28	28	103.7	2.62	0.27	1	5	4	OC(=O)[C@@H](Cc1ccccc1)NC(=O)C(=O)O	1	C256H97FeN69O68S2+7	train	Fe
1ycm	general	Protein-Ligand	NMR	Kd=10nM	Kd	8	2005	macrophage metalloelastase (mmp-12)	NGH	P39900	C13H18N2O5S	314.357	314.094	39	39	101.49	1.69	2.72	0	4	7	O=NC(=O)CN(S(=O)(=O)c1ccc(cc1)OC)CC(C)C	1	C246H80CaN60O61SZn+6	train	ZnCa
1yda	refined	Protein-Ligand	2.1	Kd=280nM	Kd	6.55	1995	carbonic anhydrase ii	AZM	P00918	C4H6N4O3S2	222.245	221.988	19	19	151.66	-1.23	1	2	5	3	CC(=O)Nc1nnc(s1)S(=O)(=O)N	1	C291H93N73O70SZn+5	test	Zn
1ydb	refined	Protein-Ligand	1.9	Kd=5.8nM	Kd	8.24	1995	carbonic anhydrase ii	AZM	P00918	C4H6N4O3S2	222.245	221.988	19	19	151.66	-1.23	1	2	5	3	CC(=O)Nc1nnc(s1)S(=O)(=O)N	1	C295H94N76O68SZn+7	train	Zn
1ydd	refined	Protein-Ligand	2.1	Kd=86nM	Kd	7.07	1995	carbonic anhydrase ii	AZM	P00918	C4H6N4O3S2	222.245	221.988	19	19	151.66	-1.23	1	2	5	3	CC(=O)Nc1nnc(s1)S(=O)(=O)N	1	C303H94N77O68S2Zn+5	train	Zn
1yei	refined	Protein-Ligand	1.9	Kd=35nM	Kd	7.46	1999	ig antibody d2.3 (light chain)	PGG	Q58EU8 P01863	C12H16N2O8P	347.238	347.064	39	39	175.5	0.58	1.62	1	7	8	O=C(NCC(=O)O)CCCP(Oc1ccc(cc1)N(=O)=O)(O)O	1	C362H104N84O80S3Zn2+6	train	Zn
1yej	refined	Protein-Ligand	1.85	Kd=35nM	Kd	7.46	1999	ig antibody d2.3 (light chain)	PNF	Q58EU8 P01863	C16H24N2O8P	403.344	403.127	51	51	175.5	2.12	3.18	1	7	12	O=C(NCCCCCC(=O)O)CCCP(Oc1ccc(cc1)N(=O)=O)(O)O	1	C371H102N88O87S3Zn2+7	train	Zn
1yfz	refined	Protein-Ligand	2.2	Ki=45uM	Ki	4.35	2005	hypoxanthine-guanine phosphoribosyltransferase	IMP	Q8R7L0	C10H14N4O8P	349.214	349.055	37	39	196.77	-3.96	-2.59	3	7	5	O[C@@H]1[C@H](O)[C@H](O[C@H]1n1cnc2c1nc[nH]c2=O)COP(O)(O)O	1	C276H106Mg2N65O80+6	train	Mg
1yhm	general	Protein-Ligand	2.5	IC50=147uM	IC50	3.83	2005	farnesyl pyrophosphate synthase	AHD	Q8WS26	C4H14NO7P2	250.104	250.025	28	27	182.55	-6.86	-1.99	2	7	4	[NH3+]CCCC(P(=O)(O)O)(P(=O)(O)O)O	1	C297H121Mg3N83O92S3Se4+8	test	Mg
1ykp	general	Protein-Ligand	2.41	Kd=1100uM	Kd	2.96	2005	protocatechuate 3,4-dioxygenase	DHB	P00436 P00437	C7H6O4	154.12	154.027	17	17	77.76	1.82	0.8	2	4	2	OC(=O)c1ccc(c(c1)O)O	1	C238H89FeN70O62S2+8	train	Fe
1ylv	general	Protein-Ligand	2.15	Ki=2.0mM	Ki	2.7	2000	aminolevulinic acid dehydratase	SHF	P05373	C5H10O2	102.132	102.068	17	16	37.3	2.6	1.26	0	2	2	CCCCC(=O)O	1	C253H92N62O65S5Zn+6	train	Zn
1you	general	Protein-Ligand	2.3	IC50=0.87nM	IC50	9.06	2005	collagenase 3 (mmp-13)	PFD	P45452	C20H19FN2O6	402.373	402.123	48	50	102.96	2.66	3.19	2	3	8	CCOCCC1(Oc2ccc(cc2)Oc2ccc(cc2)F)C(=O)NC(=O)NC1=O	1	C299H92CaN67O81SZn+4	test	ZnCa
1yq7	refined	Protein-Ligand	2.2	Ki=82.2nM	Ki	7.09	2005	Human farnesyl diphosphate synthase complexed with risedronate	RIS	P14324	C7H13NO7P2	285.128	285.017	30	30	181.68	-3.47	-1.25	1	8	3	OP(C(P(O)(O)O)(Cc1cccnc1)O)(O)O	1	C287H103Mg3N69O86S2+4	train	Mg
1yqy	refined	Protein-Ligand	2.3	Ki=24nM	Ki	7.62	2005	lethal factor	915	P15917	C14H19FN2O5S	346.374	346.1	42	43	113.11	0.84	2.58	3	4	7	ONC(=O)[C@@H](C1CCOCC1)NS(=O)(=O)c1ccc(c(c1)C)F	1	C305H107N85O93Zn+11	test	Zn
1yvm	refined	Protein-Ligand	1.6	Ki=0.4uM	Ki	6.4	2005	methionine aminopeptidase	TMG	P0AE18	C10H7N3S	201.248	201.036	21	23	69.81	2.22	2.69	1	2	1	c1scc(n1)c1nc2c([nH]1)cccc2	1	C181H64Co3N47O51S5+4	valid	XX
1yw7	general	Protein-Ligand	1.85	IC50=1.4uM	IC50	5.85	2006	human Methionine aminopeptidase-2 (MetAP2)	A41	P50579	C14H13NO4S	291.322	291.057	33	34	91.85	3.97	3.65	1	4	3	Cc1ccc(c(c1)C(=O)O)NS(=O)(=O)c1ccccc1	1	C330H111Mn2N82O88S3+5	train	Mn
1yw8	general	Protein-Ligand	2.65	IC50=10nM	IC50	8	2006	Methionine aminopeptidase 2	A75	P50579	C17H17NO4S	331.386	331.088	40	42	91.85	4.98	4.22	1	4	3	OC(=O)c1c(ccc2c1CCCC2)NS(=O)(=O)c1ccccc1	1	C319H113Mn2N80O86S3+7	test	Mn
1yyr	general	Protein-Ligand	2.5	Ki=0.51uM	Ki	6.29	2005	trichodiene synthase	SAZ	P13513	C14H26N	208.363	208.207	41	41	4.44	3.72	2.36	1	0	4	CC(=CCC[N@H+]([C@@H]1CCC(=CC1)C)C)C	1	C358H120Mg3N89O94S7+5	train	Mg
1z3j	general	Protein-Ligand	NMR	Kd=10nM	Kd	8	2005	macrophage metalloelastase (mmp-12)	NGH	P39900	C13H20N2O5S	316.373	316.109	41	41	104.32	1.23	2.32	2	4	9	ONC(=O)CN(S(=O)(=O)c1ccc(cc1)OC)CC(C)C	1	C234H76CaN58O56SZn+5	train	ZnCa
1z4n	general	Protein-Ligand	1.97	Ki=30uM	Ki	4.52	2005	beta-phosphoglucomutase	GL1	P71447	C6H14O9P	261.144	261.038	30	30	173.66	-3.85	-3.54	4	7	6	OC[C@H]1O[C@H](OP(O)(O)O)[C@@H]([C@H]([C@H]1O)O)O	1	C267H100MgN73O87S+8	test	Mg
1z4o	refined	Protein-Ligand	1.9	Ki=30uM	Ki	4.52	2005	beta-phosphoglucomutase	GL1	P71447	C6H14O9P	261.144	261.038	30	30	173.66	-3.85	-3.54	4	7	6	OC[C@H]1O[C@H](OP(O)(O)O)[C@@H]([C@H]([C@H]1O)O)O	1	C289H101MgN76O88+8	train	Mg
1z9g	refined	Protein-Ligand	1.7	Ki=2.3uM	Ki	5.64	2005	thermolysin	RRT	P00800	C12H15NO3S	253.317	253.077	32	32	105.2	2.43	1.51	1	3	7	SC[C@@H](Cc1ccccc1)NC(=O)CC(=O)O	1	C244H88N64O77SZn+3	valid	Zn
1z9y	refined	Protein-Ligand	1.66	Ki=65nM	Ki	7.19	2006	human carbonic anhydrase II	FUN	P00918	C12H11ClN2O5S	330.744	330.008	32	33	131.01	2.86	3.74	2	4	4	OC(=O)c1cc(c(cc1NCc1ccco1)Cl)S(=O)(=O)N	1	C320H100N81O71SZn2+5	valid	Zn
1zdp	refined	Protein-Ligand	1.7	Ki=1.8uM	Ki	5.74	2005	thermolysin	TIO	P00800	C12H15NO3S	253.317	253.077	32	32	105.2	2.23	1.37	1	3	7	SC[C@H](C(=O)NCC(=O)O)Cc1ccccc1	1	C235H83N63O75SZn+3	train	Zn
1ze8	general	Protein-Ligand	2	Ki=21nM	Ki	7.68	2005	carbonic anhydrase ii	PIU	P00918	C16H21N2O2S	305.415	305.132	42	43	72.42	2.6	3.57	1	2	4	Cc1cc(C)cc([n+]1CCc1ccc(cc1)S(=O)(=O)N)C	1	C309H96N77O70SZn+4	valid	Zn
1zfk	general	Protein-Ligand	1.56	Ki=12nM	Ki	7.92	2006	human carbonic anhydrase II	NR2	P00918	C14H15N3O5S2	369.416	369.045	39	40	152.19	1.54	4.48	3	5	6	O=C(NS(=O)(=O)c1ccc(cc1)C)Nc1ccc(cc1)S(=O)(=O)N	1	C337H103N85O83SZn+5	test	Zn
1zfq	refined	Protein-Ligand	1.55	Ki=30nM	Ki	7.52	2006	human carbonic anhydrase II	ZEC	P00918	C7H6N2O3S2	230.264	229.982	20	21	129.9	0.92	2.43	2	4	2	Oc1ccc2c(c1)sc(n2)S(=O)(=O)N	1	C278H92N71O62Zn+4	valid	Zn
1zge	refined	Protein-Ligand	1.65	Ki=50nM	Ki	7.3	2006	human carbonic anhydrase II	SDA	P00918	C6H6Cl2N2O2S	241.095	239.953	19	19	94.56	1.06	3.59	2	2	1	Nc1c(Cl)cc(cc1Cl)S(=O)(=O)N	1	C300H89N75O63SZn+5	test	Zn
1zkl	general	Protein-Ligand	1.67	IC50=8.1uM	IC50	5.09	2005	camp-specific 3',5'-cyclic phosphodiesterase	IBM	Q13946	C10H14N4O2	222.244	222.112	30	31	72.68	0.95	0.08	1	3	2	CC(Cn1c(=O)n(C)c(=O)c2c1nc[nH]2)C	1	C257H100MgN69O71S2Zn+5	train	ZnMg
1zkn	general	Protein-Ligand	2.1	IC50=31uM	IC50	4.51	2005	camp-specific 3',5'-cyclic phosphodiesterase 4d	IBM	Q08499	C10H14N4O2	222.244	222.112	30	31	72.68	0.95	0.08	1	3	2	CC(Cn1c(=O)n(C)c(=O)c2c1nc[nH]2)C	1	C257H102MgN72O72S4Zn+5	valid	ZnMg
1zp5	general	Protein-Ligand	1.8	IC50=1200uM	IC50	2.92	2005	matrix metalloproteinase 8	2NI	P22894	C17H17N3O3	311.335	311.127	40	41	85.59	2.07	3.03	2	3	8	ONC(=O)N(CCOc1ccc(cc1)c1ccc(cc1)C#N)C	1	C300H95CaN73O83SZn+5	train	ZnCa
1zs0	refined	Protein-Ligand	1.56	Ki=700nM	Ki	6.15	2006	neutrophil collagenase	EIN	P22894	C17H23NO6PS	400.406	400.098	49	50	138.06	1.99	3.83	1	5	6	COc1ccc(cc1)c1ccc(cc1)S(=O)(=O)N[C@@H](P(O)(O)O)C(C)C	1	C317H99CaN78O83SZn2+6	train	ZnCa
1zsb	general	Protein-Ligand	2	Kd=250mM	Kd	0.6	1996	carbonic anhydrase ii	AZM	P00918	C4H6N4O3S2	222.245	221.988	19	19	151.66	-1.23	1	2	5	3	CC(=O)Nc1nnc(s1)S(=O)(=O)N	1	C337H97N85O73S2Zn+5	valid	Zn
1ztq	general	Protein-Ligand	2	IC50=1.3nM	IC50	8.89	2006	collagenase 3 (mmp-13)	033	P45452	C26H24N2O6S	492.544	492.136	59	62	134.09	5.93	6.28	2	5	8	CC([C@@H](C(=O)O)NS(=O)(=O)c1ccc(cc1)c1ccc(cc1)NC(=O)c1cc2c(o1)cccc2)C	1	C348H100CaN80O89S2Zn2+6	train	ZnCa
1zvx	refined	Protein-Ligand	1.87	Ki=0.6nM	Ki	9.22	2006	neutrophil collagenase	FIN	P22894	C17H23NO6PS	400.406	400.098	49	50	138.06	1.99	3.83	1	5	6	COc1ccc(cc1)c1ccc(cc1)S(=O)(=O)N[C@H](P(O)(O)O)C(C)C	1	C312H95CaN76O89SZn+5	test	ZnCa
1zxc	general	Protein-Ligand	2.28	IC50=8nM	IC50	8.1	2005	adam 17	IH6	P78536	C17H22N2O5S2	398.497	398.097	48	49	129.62	1.6	2.89	2	4	8	ONC(=O)[C@@H]1N(CCSC1(C)C)S(=O)(=O)c1ccc(cc1)OCC#CC	1	C304H95N77O87S3Zn+7	valid	Zn
1zxv	general	Protein-Ligand	2.67	Ki=0.8uM	Ki	6.1	2005	lethal factor	MFM	Q52NH3 P15917	C17H12ClNO4S2	393.864	392.99	37	39	128.14	5.31	4.21	0	3	4	OC(=O)CCN1C(=S)S/C(=C/c2ccc(o2)c2ccc(cc2)Cl)/C1=O	1	C246H87N66O71Zn+7	train	Zn
1zz1	general	Protein-Ligand	1.57	IC50=0.95uM	IC50	6.02	2005	histone deacetylase-like amidohydrolase	SHH	Q70I53	C14H20N2O3	264.32	264.147	39	39	78.43	1.59	2.94	3	3	11	ONC(=O)CCCCCCC(=O)Nc1ccccc1	1	C250H87N73O80S3Zn+	valid	Zn
1zz3	general	Protein-Ligand	1.76	IC50=0.290uM	IC50	6.54	2005	histone deacetylase-like amidohydrolase	3YP	Q70I53	C8H13NO2	155.194	155.095	24	24	46.5	2.01	2.25	0	2	3	O=NC(=O)CCC1CCCC1	1	C212H73N61O65S3Zn+	train	Zn
2a3w	general	Protein-Ligand	2.2	IC50=3.8uM	IC50	5.42	2005	serum amyloid p-component	CPJ	P02743	C16H24N2O12	436.368	436.133	54	55	188.18	0.35	-0.35	2	6	9	O=C(O[C@@H]1CO[C@](OC1)(C)C(=O)O)NCCNC(=O)O[C@@H]1CO[C@](OC1)(C)C(=O)O	1	C261H108Ca4N70O93+7	valid	Ca
2a3x	general	Protein-Ligand	3	IC50=0.12uM	IC50	6.92	2005	serum amyloid p-component	CPK	P02743	C18H26N2O12	462.405	462.149	58	60	170.6	0.49	-0.81	0	6	6	O=C(N1CCN(CC1)C(=O)O[C@@H]1CO[C@](OC1)(C)C(=O)O)O[C@@H]1CO[C@](OC1)(C)C(=O)O	1	C304H116Ca4N82O105+8	train	Ca
2a8h	general	Protein-Ligand	2.3	IC50=67nM	IC50	7.17	2006	adam 17	4NH	P78536	C17H24N3O5S2	414.52	414.116	51	52	157.26	0.09	1.11	3	4	8	[NH3+]CC#CCOc1ccc(cc1)S(=O)(=O)N1CCSC([C@@H]1C(=O)NO)(C)C	1	C275H87N70O82S2Zn+7	train	Zn
2ad5	general	Protein-Ligand	2.8	Ki=110uM	Ki	3.96	2005	ctp synthase	CTP	P0A7E5	C9H19N3O14P3	486.18	486.008	48	49	321.4	-6.38	-3.6	3	10	9	O[C@@H]1[C@@H](COP(OP(OP(O)(O)O)(O)O)(O)O)O[C@H]([C@@H]1O)n1ccc(=N)[nH]c1=O	1	C326H131MgN88O102S2+8	train	Mg
2ada	general	Protein-Ligand	2.4	Ki=0.1pM	Ki	13	1995	adenosine deaminase	HPR	P03958	C10H12N4O5	268.226	268.081	31	33	133.49	-2.15	-2.27	4	5	5	OC[C@H]1O[C@H]([C@@H]([C@@H]1O)O)n1cnc2c1nc[nH]c2=O	1	C310H112N80O84S5Zn+7	train	Zn
2adu	general	Protein-Ligand	1.9	Ki=18nM	Ki	7.74	2005	methionine aminopeptidase	R20	P50579	C9H9N3	159.188	159.08	21	22	41.57	1.7	1.78	1	2	1	Cc1cccc(c1)c1c[nH]nn1	1	C263H94Co2N65O68S3+5	valid	XX
2aeb	general	Protein-Ligand	1.29	Kd=5nM	Kd	8.3	2005	arginase 1	ABH	P05089	C6H15BNO4	175.999	176.109	27	26	105.4	-2.11	-1.68	3	4	7	OB(CCCC[C@@H](C(=O)O)[NH3+])O	1	C230H89Mn2N68O82S+4	train	Mn
2ael	general	Protein-Ligand	2.5	Ki=0.51uM	Ki	6.29	2005	trichodiene synthase	SAZ	P13513	C14H26N	208.363	208.207	41	41	4.44	3.72	2.36	1	0	4	CC(=CCC[N@H+]([C@@H]1CCC(=CC1)C)C)C	1	C353H121Mg3N86O97S6+5	train	Mg
2afw	refined	Protein-Ligand	1.56	Ki=17uM	Ki	4.77	2005	glutaminyl-peptide cyclotransferase	AHN	Q16769	C7H11N3O	153.182	153.09	22	22	57.78	-0.33	0.48	2	2	4	CC(=O)NCCc1c[nH]cn1	1	C252H96N61O73SZn+4	train	Zn
2afx	refined	Protein-Ligand	1.64	Ki=7.1uM	Ki	5.15	2005	glutaminyl-peptide cyclotransferase	1BN	Q16769	C10H10N2	158.2	158.084	22	23	17.82	1.61	1.93	0	1	2	c1ccc(cc1)Cn1cncc1	1	C222H90N54O63Zn+3	train	Zn
2ai7	general	Protein-Ligand	2	IC50=0.4uM	IC50	6.4	2005	peptide deformylase	SB7	Q8DP79	C10H16NO2	182.24	182.118	29	29	44.9	1.5	-0.16	3	2	7	OC[N@H+](CCCc1ccccc1)O	1	C240H86N63NiO65S4+4	train	XX
2ai8	general	Protein-Ligand	1.7	IC50=0.16uM	IC50	6.8	2005	peptide deformylase	SB7	P0A6K3	C10H16NO2	182.24	182.118	29	29	44.9	1.5	-0.16	3	2	7	OC[N@@H+](CCCc1ccccc1)O	1	C279H95N73NiO81S5+5	train	XX
2aia	general	Protein-Ligand	1.7	IC50=3.9uM	IC50	5.41	2005	peptide deformylase	SB8	Q8DP79	C16H18NO4	288.318	288.124	39	40	71.2	2.2	0.52	3	3	9	OC[N@@H+](CCOc1cccc(c1)C(=O)c1ccccc1)O	1	C247H87N65NiO68S4+4	train	XX
2aie	general	Protein-Ligand	1.7	IC50=2.2uM	IC50	5.66	2005	peptide deformylase	SB9	Q8DP79	C10H17N2O2	197.254	197.129	31	31	57.79	0.87	-0.45	3	3	7	OC[N@@H+](CCCc1cccc(n1)C)O	1	C237H82N63NiO65S4+4	train	XX
2aig	general	Protein-Ligand	2.6	IC50=10uM	IC50	5	1998	adamalysin ii	0GR	P34179	C22H25N3O5	411.451	411.179	55	57	124.43	4.26	3.5	3	4	10	CC(C[C@@H](C(=O)N[C@H](C(=O)O)Cc1c[nH]c2c1cccc2)NC(=O)c1ccco1)C	1	C222H75N60O58S4Zn+8	test	Zn
2am4	refined	Protein-Ligand	1.7	Ki=190uM	Ki	3.72	2006	2-beta-n-acetylglucosaminyltransferase i	U2F	P27115	C15H25FN2O16P2	570.309	570.066	61	63	310.26	-5.77	-4.69	6	11	14	OC[C@H]1O[C@H](OP(OP(OC[C@H]2O[C@H]([C@@H]([C@@H]2O)O)n2ccc(=O)[nH]c2=O)(O)O)(O)O)[C@@H]([C@H]([C@@H]1O)O)F	1	C397H124MnN109O105S3+9	valid	Mn
2amt	refined	Protein-Ligand	2.3	Kd=36uM	Kd	4.44	2006	2-c-methyl-d-erythritol 2,4-cyclodiphosphate	1AA	P62617	C18H26N4O13P2	568.366	568.097	63	65	298.71	-3.58	-0.58	4	8	14	O[C@@H]1[C@@H](COP(OP(OCCOC(=O)c2ccccc2N)(O)O)(O)O)O[C@H]([C@@H]1O)n1ccc(nc1=O)N	1	C339H128N85O101S2Zn+7	valid	Zn
2aw1	general	Protein-Ligand	1.46	Ki=43nM	Ki	7.37	2006	carbonic anhydrase ii	COX	P00918	C16H14N2O3S	314.359	314.073	36	38	94.57	2.62	4.75	1	3	3	Cc1onc(c1c1ccc(cc1)S(=O)(=O)N)c1ccccc1	1	C349H107N87O80S2Zn+5	train	Zn
2b1q	general	Protein-Ligand	2.2	Ki=26mM	Ki	1.59	2006	hypothetical protein slr0953	TRE	P74325	C12H22O11	342.296	342.116	45	46	189.53	-4.18	-5.4	8	8	12	OC[C@H]1O[C@H](O[C@H]2O[C@H](CO)[C@H]([C@@H]([C@H]2O)O)O)[C@@H]([C@H]([C@@H]1O)O)O	1	C282H102MgN77O98S+5	valid	Mg
2b1r	general	Protein-Ligand	2.2	Ki=101mM	Ki	1	2006	hypothetical protein slr0953	CBI	P74325	C12H22O11	342.296	342.116	45	46	189.53	-4.73	-5.4	8	8	12	OC[C@H]1O[C@H](O)[C@@H]([C@H]([C@@H]1O[C@@H]1O[C@H](CO)[C@H]([C@@H]([C@H]1O)O)O)O)O	1	C283H105MgN79O98S+6	train	Mg
2bb7	general	Protein-Ligand	1.7	IC50=2.14uM	IC50	5.67	2006	methionine aminopeptidase	QMS	P0AE18	C10H10N2O2S	222.264	222.046	25	26	67.44	1.16	2.76	1	3	2	CS(=O)(=O)Nc1cccc2c1nccc2	1	C229H85Mn3N62O70S5+4	train	Mn
2bcd	general	Protein-Ligand	2.1	IC50=0.06nM	IC50	10.22	2006	serine/threonine protein phosphatase pp1-gamma	5-mer	P36873	C40H59N5O10	769.924	769.426	114	115	220.54	5.72	3.7	4	9	9	CO[C@H]([C@H](/C=C(/C=C/[C@@H]1NC(=O)[C@@H](NC(=O)[C@@H](C)[C@@H](NC(=O)[C@@H](N(C(=O)CC[C@@H](NC(=O)[C@H]1C)C(=O)O)C)CC)C(=O)O)C(C)C)\C)C)Cc1ccccc1	1	C209H77Mn2N66O70S2+6	train	Mn
2bed	general	Protein-Ligand	2.7	IC50=0.007uM	IC50	8.15	2006	farnesyltransferase	736	Q02293 Q04631	C24H30ClN4O2S	474.039	473.178	62	66	78.5	2.94	4.75	1	3	3	Clc1ccc2c(c1)C(=Cc1c([C@H]2C2CCN(CC2)S(=O)(=O)C)nccc1)N1CC[NH2+]CC1	1	C392H128N104O105S5Zn+6	test	Zn
2boi	general	Protein-Ligand	1.1	IC50=48uM	IC50	4.32	2006	lectin cv-iil	MFU	Q7NX84	C7H14O5	178.183	178.084	26	26	79.15	-1.55	-1.54	3	3	4	CO[C@@H]1O[C@@H](C)[C@H]([C@H]([C@@H]1O)O)O	1	C130H57Ca2N40O57S+2	valid	Ca
2boj	refined	Protein-Ligand	1.8	Kd=1.7uM	Kd	5.77	2006	pseudomonas aeruginosa lectin ii	ARW	Q9HYN5	C6H12O5	164.156	164.068	23	23	79.15	-1.99	-1.93	3	3	4	CO[C@@H]1OC[C@H]([C@H]([C@@H]1O)O)O	1	C127H56Ca2N44O58+2	train	Ca
2br6	general	Protein-Ligand	1.7	Ki=1.10mM	Ki	2.96	2005	aiia-like protein	HSL	P0CJ63	C4H8NO2	102.112	102.056	15	15	53.94	-0.63	-1.46	1	1	0	O=C1OCC[C@@H]1[NH3+]	1	C193H73N52O49S4Zn2+7	train	Zn
2buv	refined	Protein-Ligand	1.8	Kd=100uM	Kd	4	2006	3,4 PCD from acinetobacter SP. ADP1 MUTANT R457S	DHB	P20371 P20372	C7H6O4	154.12	154.027	17	17	77.76	1.82	0.8	2	4	2	OC(=O)c1ccc(c(c1)O)O	1	C236H81FeN67O65S+6	valid	Fe
2bv4	general	Protein-Ligand	1	IC50=600uM	IC50	3.22	2006	lectin cv-iil	MMA	Q7NX84	C7H14O6	194.182	194.079	27	27	99.38	-2.05	-2.57	4	4	6	CO[C@H]1O[C@H](CO)[C@H]([C@@H]([C@@H]1O)O)O	1	C124H54Ca2N36O56S+	train	Ca
2bw7	general	Protein-Ligand	2.3	IC50=2uM	IC50	5.7	2005	adenylate cyclase	ECS	O32393	C18H24O3	288.381	288.173	45	48	60.69	3.55	3.31	3	3	3	O[C@H]1CC[C@@H]2[C@]1(C)CC[C@H]1[C@H]2CCc2c1cc(O)c(c2)O	1	C256H91Ca2Mg2N72O71S2+8	train	MgCa
2c6c	general	Protein-Ligand	2	IC50=30nM	IC50	7.52	2006	glutamate carboxypeptidase ii	24I	Q04609	C13H17IO6P	427.149	426.981	38	38	128.65	2.98	2.19	0	6	6	OC(=O)CC[C@@H](C(=O)O)CP(Cc1ccc(cc1)I)(O)O	1	C332H111N94O101Zn2+11	train	Zn
2c6g	general	Protein-Ligand	2.2	IC50=428uM	IC50	3.37	2006	Membrane-bound glutamate carboxypeptidase II (GCPII)	GLU	Q04609	C5H10NO4	148.137	148.061	20	19	102.24	-1.18	-1.45	1	4	2	OC(=O)CC[C@@H](C(=O)O)[NH3+]	1	C230H82N61O69Zn2+6	train	Zn
2c6n	general	Protein-Ligand	3	Ki=131.5nM	Ki	6.88	2006	human somatic angiontensin-I converting enzyme N domain	LPR	P12821	C21H31N3O5	405.488	405.226	60	61	139.16	-1.33	-0.79	2	5	11	[NH3+]CCCC[C@@H](C(=O)N1CC=C[C@H]1C(=O)O)[NH2+][C@H](C(=O)O)CCc1ccccc1	1	C377H137N102O107S4Zn+9	train	Zn
2cbz	refined	Protein-Ligand	1.5	Kd=118uM	Kd	3.93	2006	multidrug resistance-associated protein 1	ATP	P33527	C10H19N5O13P3	510.205	510.019	50	52	329.38	-6.07	-2.36	3	12	9	O[C@@H]1[C@@H](COP(OP(OP(O)(O)O)(O)O)(O)O)O[C@H]([C@@H]1O)n1cnc2c1ncnc2N	1	C199H74MgN51O63S3+2	valid	Mg
2cc7	refined	Protein-Ligand	1.8	Kd=9.88nM	Kd	8.01	2006	dodecin	LUM	B0R5M0	C12H10N4O2	242.233	242.08	28	30	91.5	1.13	0.78	2	4	0	Cc1cc2nc3c(nc2cc1C)[nH]c(=O)[nH]c3=O	1	C242H95Mg3N58O77+2	valid	Mg
2ccc	refined	Protein-Ligand	1.7	Kd=17.57nM	Kd	7.76	2006	dodecin	LFN	B0R5M0	C13H13N4O2	257.268	257.104	32	34	82.49	1.26	0.21	2	3	0	Cc1cc2nc3c(=O)[nH]c(=O)[nH]c3[n+](c2cc1C)C	1	C237H97Mg2N57O75+2	valid	Mg
2chm	general	Protein-Ligand	1.6	IC50=5.5nM	IC50	8.26	2006	cgmp-specific 3',5'-cyclic phosphodiesterase	3P4	O76074 Q07343	C23H31N6O3	439.531	439.246	63	66	107.2	2.14	3.15	2	4	9	CCCCOc1ncc(cc1c1[nH]c(=O)c2c(n1)c(CC)n(n2)[C@@H]1C[N@H+](C1)CC)C(=O)C	1	C367H134MgN94O106S5Zn+6	test	ZnMg
2cn8	general	Protein-Ligand	2.7	IC50=3.5uM	IC50	5.46	2006	serine/threonine-protein kinase chk2	DBQ	O96017	C11H12N5O2	246.245	246.099	30	32	113.98	0.1	0.31	2	2	0	O=C1NC(=[NH+]/C/1=C\1/CCNC(=O)c2c1cc[nH]2)N	1	C205H82MgN54O58S2+6	train	Mg
2ctc	refined	Protein-Ligand	1.4	Ki=0.13mM	Ki	3.89	1994	carboxypeptidase a	HFA	P00730	C9H10O3	166.174	166.063	22	22	57.53	2.01	0.67	1	3	3	O[C@H](C(=O)O)Cc1ccccc1	1	C289H91N70O80Zn+3	train	Zn
2d1n	refined	Protein-Ligand	2.37	Ki=7nM	Ki	8.15	2006	collagenase 3	FA4	P45452	C24H44N6O3	464.645	464.347	77	77	172.08	4.58	1.79	4	3	21	[NH3+]CCCC[C@H](C(=O)NO)NC(=O)CCCCCCCCCc1ccccc1C[NH+]=C(N)N	1	C335H98CaN74O86S2Zn+6	valid	ZnCa
2d1o	refined	Protein-Ligand	2.02	Ki=0.02uM	Ki	7.7	2006	stromelysin-1	FA4	P08254	C24H44N6O3	464.645	464.347	77	77	172.08	4.58	1.79	4	3	21	[NH3+]CCCC[C@H](C(=O)NO)NC(=O)CCCCCCCCCc1ccccc1C[NH+]=C(N)N	1	C323H101CaN82O87SZn+6	test	ZnCa
2d2v	general	Protein-Ligand	2.5	Ki=100mM	Ki	1	2006	hypothetical protein slr0953	MAL	P74325	C12H22O11	342.296	342.116	45	46	189.53	-4.73	-5.4	8	8	12	OC[C@H]1O[C@H](O)[C@@H]([C@H]([C@@H]1O[C@H]1O[C@H](CO)[C@H]([C@@H]([C@H]1O)O)O)O)O	1	C254H95MgN69O90+5	test	Mg
2ddf	general	Protein-Ligand	1.7	IC50=41nM	IC50	7.39	2006	TNT- alpha converting enzyme	INN	P78536	C19H38N5O5	416.536	416.287	67	66	164.27	-0.13	0.5	6	5	17	ONC(=O)C[C@H](C(=O)N[C@@H](C(C)(C)C)C(=O)N[C@H](C(=O)NCC[NH3+])C)CC(C)C	1	C276H90CaN72O84S2Zn+7	valid	ZnCa
2doo	refined	Protein-Ligand	2.43	Kd=67nM	Kd	7.17	2006	BETA-LACTAMASE IMP-1	C4H	P52699	C19H27N3O3S2	409.566	409.149	54	55	125.69	2.51	4.26	2	3	12	SCCC(=O)NCCCCNS(=O)(=O)c1cccc2c1cccc2N(C)C	1	C320H103N87O94SZn2+9	train	Zn
2dua	general	Protein-Ligand	2	Ki=17uM	Ki	4.77	2006	phosphonopyruvate hydrolase	OXL	Q84G06	C2H2O4	90.035	89.995	8	7	74.6	1.52	-0.84	0	4	0	OC(=O)C(=O)O	1	C148H60MgN40O50S+2	test	Mg
2dw7	refined	Protein-Ligand	2.5	Ki=20uM	Ki	4.7	2006	bll6730 protein	SRT	Q89FH0	C4H6O6	150.087	150.016	16	15	115.06	-0.12	-2.12	2	6	3	O[C@H]([C@@H](C(=O)O)O)C(=O)O	1	C252H94MgN66O74S2+5	test	Mg
2e1w	refined	Protein-Ligand	2.5	Ki=11nM	Ki	7.96	2006	adenosine deaminase	FR6	P56658	C19H21N3O2	323.389	323.163	45	47	81.14	2.5	3.39	2	3	7	C[C@@H]([C@H](n1cnc(c1)C(=O)N)CCc1cccc2c1cccc2)O	1	C319H115N82O84S6Zn+7	train	Zn
2e91	refined	Protein-Ligand	2.14	Ki=0.26uM	Ki	6.59	2007	Geranylgeranyl pyrophosphate synthetase	ZOL	Q12051	C5H12N2O7P2	274.106	274.012	28	28	186.61	-4.64	-1.99	1	8	3	OP(C(P(O)(O)O)(Cn1cncc1)O)(O)O	1	C236H97Mg2N66O77S+7	valid	Mg
2e92	refined	Protein-Ligand	2.31	Ki=0.13uM	Ki	6.89	2007	Geranylgeranyl pyrophosphate synthetase	M0N	Q12051	C9H14N2O7P2	324.164	324.028	34	35	186.09	-2.53	-1	1	8	3	OP(C(P(O)(O)O)(Cc1cnc2n1cccc2)O)(O)O	1	C313H125Mg2N91O98S+10	valid	Mg
2e94	refined	Protein-Ligand	2.18	Ki=0.01uM	Ki	8	2007	Geranylgeranyl pyrophosphate synthetase	364	Q12051	C19H22NO7P2	438.328	438.087	51	53	172.67	-0.41	1.43	1	7	5	OP(C(P(O)(O)O)(C[n+]1cccc(c1)c1cccc(c1)c1ccccc1)O)(O)O	1	C370H145MgN98O106S2+11	train	Mg
2e95	general	Protein-Ligand	2.2	Ki=0.08uM	Ki	7.1	2007	Geranylgeranyl pyrophosphate synthetase	B75	Q12051	C24H25NO9P2S	565.469	565.073	62	65	223.34	1	4.13	2	9	7	OP(C(P(O)(O)O)(Cc1cccc(c1)c1cccc(c1)NS(=O)(=O)c1ccc2c(c1)cccc2)O)(O)O	1	C406H154Mg2N113O118S+14	test	Mg
2ea2	general	Protein-Ligand	2.5	IC50=16nM	IC50	7.8	2008	methionine aminopeptidase-2 (MetAP2)	F77	P50579	C16H16FNO4S	337.366	337.078	39	40	91.85	4.87	4.35	1	4	4	CCc1ccc(c(c1C)C(=O)O)NS(=O)(=O)c1ccc(cc1)F	1	C317H115Mn2N82O88S4+6	train	Mn
2ea4	general	Protein-Ligand	2.35	IC50=46nM	IC50	7.34	2008	methionine aminopeptidase-2 (MetAP2)	F79	P50579	C17H20FN2O5S	383.415	383.108	46	47	128.72	1.26	2.66	2	4	7	CCc1ccc(c(c1OCC[NH3+])C(=O)O)NS(=O)(=O)c1ccc(cc1)F	1	C343H122Mn2N88O92S6+6	train	Mn
2eg7	general	Protein-Ligand	2	Ki=1.3uM	Ki	5.89	2007	Dihydroorotase	OTD	P05020	C6H6N2O5	186.122	186.028	19	19	115.73	0.67	-0.62	2	5	0	O=C1N[C@H](C=C(N1)C(=O)O)C(=O)O	1	C202H86N61O59S4Zn2+5	valid	Zn
2eg8	general	Protein-Ligand	2.2	Ki=31.8uM	Ki	4.5	2007	Dihydroorotase	FOT	P05020	C5H3FN2O4	174.087	174.008	15	15	103.02	-0.04	-1.1	2	4	0	O=c1[nH]c(=O)c(c([nH]1)C(=O)O)F	1	C200H80N58O56S4Zn2+5	test	Zn
2ei6	general	Protein-Ligand	2.3	IC50=41nM	IC50	7.39	2008	coagulation factor Xa	D92	P00742	C23H27ClN5O2S	473.011	472.157	59	63	119.56	3.9	4.67	4	3	6	C[N@@H+]1CCc2c(C1)sc(n2)C(=O)N[C@@H]1CCCC[C@@H]1NC(=O)c1[nH]c2c(c1)cc(cc2)Cl	1	C308H114CaN81O94S6+7	train	Ca
2evc	general	Protein-Ligand	1.6	IC50=0.29uM	IC50	6.54	2006	methionine aminopeptidase	FC3	P0AE18	C12H7F3O3	256.177	256.035	25	26	50.44	4.18	3.66	0	2	1	OC(=O)c1ccc(o1)c1ccccc1C(F)(F)F	1	C244H90Mn2N65O72S5+5	train	Mn
2evm	general	Protein-Ligand	1.7	IC50=0.693uM	IC50	6.16	2006	methionine aminopeptidase	FC2	P0AE18	C11H6Cl2O3	257.07	255.969	22	23	50.44	4.55	3.95	0	2	1	Clc1ccc(c(c1)c1ccc(o1)C(=O)O)Cl	1	C231H82Mn2N61O70S5+5	train	Mn
2evo	general	Protein-Ligand	1.7	IC50=0.067uM	IC50	7.17	2006	methionine aminopeptidase	CT0	P0AE18	C10H13N3O2S	239.294	239.073	29	30	99.33	1.44	1.6	2	3	5	O=C(C(=O)NC1CCCC1)Nc1nccs1	1	C198H76Co3N53O57S5+4	train	XX
2ew5	general	Protein-Ligand	2.2	IC50=1.25uM	IC50	5.9	2006	peptide deformylase	Y12	Q672W7	C21H21NO5	367.395	367.142	48	49	81.7	3.08	3.3	1	3	10	CC(=O)Oc1cc(/C=C/C(=O)NCCc2ccccc2)ccc1OC(=O)C	1	C258H86CoN63O71S3+4	valid	XX
2ew6	general	Protein-Ligand	2.2	IC50=10.8uM	IC50	4.97	2006	peptide deformylase	Y13	Q672W7	C17H17NO4	299.321	299.116	39	40	89.79	2.52	2.57	4	4	9	O=C(/C=C/c1ccc(c(c1)O)O)NCCc1ccc(cc1)O	1	C266H85CoN65O70S2+5	train	XX
2ewb	refined	Protein-Ligand	1.85	Ki=0.8uM	Ki	6.1	2006	cytosol aminopeptidase	ZED	P00727	C15H19NO3S2	325.446	325.081	40	41	121.71	3.43	2.34	0	3	6	SC[C@H](C(=O)N1C[C@H](C[C@H]1C(=O)O)Sc1ccccc1)C	1	C305H121N92O99S8Zn2+6	valid	Zn
2ez7	refined	Protein-Ligand	2	Kd=43.5uM	Kd	4.36	2006	carbonic anhydrase ii	DHI	P00918	C6H10N3O2	156.162	156.077	21	21	93.62	-2.35	-1.35	2	3	2	OC(=O)[C@H]([NH3+])Cc1c[nH]cn1	1	C222H77N55O49Zn+5	valid	Zn
2f14	general	Protein-Ligand	1.71	Kd=0.64nM	Kd	9.19	2006	carbonic anhydrase ii	FL1	P00918	C29H23N3O7S2	589.639	589.098	64	68	212.43	3.66	6.39	4	6	9	S=C(Nc1ccc(c(c1)C(=O)O)c1c2ccc(=O)cc2oc2c1ccc(c2)O)NCCc1ccc(cc1)S(=O)(=O)N	1	C335H104N90O82SZn+7	train	Zn
2f18	general	Protein-Ligand	1.3	IC50=80uM	IC50	4.1	2006	Alpha-mannosidase II	GB1	Q24451	C13H22N2O3	254.325	254.163	40	41	93.91	-0.63	-1.48	5	3	8	OC[C@@H](c1ccccc1)[NH2+]C[C@H]1[NH2+]C[C@@H]([C@@H]1O)O	1	C302H107N85O83S2Zn+8	test	Zn
2f1a	general	Protein-Ligand	1.45	IC50=720uM	IC50	3.14	2006	alpha-mannosidase II	GB2	Q24451	C13H22N2O3	254.325	254.163	40	41	93.91	-0.63	-1.48	5	3	8	OC[C@H](c1ccccc1)[NH2+]C[C@H]1[NH2+]C[C@@H]([C@@H]1O)O	1	C300H108N84O85S2Zn+7	test	Zn
2f1b	general	Protein-Ligand	1.45	IC50=1000uM	IC50	3	2006	alpha-mannosidase II	GB3	Q24451	C14H24N2O3	268.352	268.179	43	44	93.91	-0.2	-1.09	5	3	8	OC[C@@H](c1ccccc1)[NH2+]C[C@H]1[NH2+][C@@H]([C@@H]([C@@H]1O)O)C	1	C316H110N86O85S2Zn+7	test	Zn
2f7o	refined	Protein-Ligand	1.43	Ki=0.036uM	Ki	7.44	2006	alpha-mannosidase ii	MSN	Q24451	C6H14NO3S	180.245	180.069	25	25	113.63	-2.01	-2.58	4	3	4	CS[C@@H]1[C@@H]([NH3+])[C@H]([C@H]([C@H]1O)O)O	1	C240H86N60O72SZn+5	train	Zn
2f7p	refined	Protein-Ligand	1.28	Ki=0.249uM	Ki	6.6	2006	alpha-mannosidase ii	2SK	Q24451	C13H20NO3S	270.368	270.116	38	39	102.6	-0.01	-1.05	4	3	7	CS[C@@H]1[C@@H]([NH2+]Cc2ccccc2)[C@H]([C@H]([C@H]1O)O)O	1	C321H112N86O91SZn+7	test	Zn
2f89	general	Protein-Ligand	2.6	Ki=331nM	Ki	6.48	2006	human farnesyl pyrophosphate synthase (FPPS)	210	P14324	C3H14NO7P2	238.093	238.025	27	26	196.43	-7.22	-3.26	2	7	3	[NH3+]CCC(P(O)(O)O)(P(O)(O)O)O	1	C277H98Mn3N71O86S2+5	test	Mn
2f94	refined	Protein-Ligand	1.94	Ki=195nM	Ki	6.71	2006	human farnesyl pyrophosphate synthase (FPPS)	BFQ	P14324	C9H26NO7P2	322.253	322.118	45	44	173.23	-4.45	-1.79	2	7	8	CCCCC[N@@H+](CCC(P(O)(O)O)(P(O)(O)O)O)C	1	C369H137N94O124SZn3+6	train	Zn
2f9k	refined	Protein-Ligand	2.06	Ki=85.9nM	Ki	7.07	2006	human farnesyl pyrophosphate synthase (FPPS)	ZOL	P14324	C5H12N2O7P2	274.106	274.012	28	28	186.61	-4.64	-1.99	1	8	3	OP(C(P(O)(O)O)(Cn1cncc1)O)(O)O	1	C251H103N66O81S2Zn3+6	valid	Zn
2ff1	general	Protein-Ligand	2.07	Ki=6.2nM	Ki	8.21	2006	iag-nucleoside hydrolase	IMH	Q9GPQ4	C11H15N4O4	267.261	267.109	34	36	138.84	-2.3	-1.48	6	4	5	OC[C@H]1[NH2+][C@H]([C@@H]([C@@H]1O)O)c1c[nH]c2c1nc[nH]c2=O	1	C288H94CaN68O78S5+2	train	Ca
2ff2	general	Protein-Ligand	2.2	Ki=6.2nM	Ki	8.21	2006	iag-nucleoside hydrolase	IMH	Q9GPQ4	C11H15N4O4	267.261	267.109	34	36	138.84	-2.3	-1.48	6	4	5	OC[C@H]1[NH2+][C@H]([C@@H]([C@@H]1O)O)c1c[nH]c2c1nc[nH]c2=O	1	C323H106CaN79O91S5+2	test	Ca
2fkf	general	Protein-Ligand	2	Kd=1.2mM	Kd	2.92	2006	phosphomannomutase/phosphoglucomutase	G16	P26276	C6H16O12P2	342.132	342.012	36	36	236.94	-5.66	-3.86	3	9	6	O[C@@H]1[C@@H](COP(O)(O)O)O[C@@H]([C@@H]([C@H]1O)O)OP(O)(O)O	1	C244H113N80O86PS2Zn+10	train	Zn
2fm0	general	Protein-Ligand	2	IC50=0.4nM	IC50	9.4	2006	camp-specific 3',5'-cyclic phosphodiesterase 4d	M98	Q08499	C23H19F8N2O4S	571.46	571.094	57	60	109.25	4.93	6.66	1	3	10	FC(Oc1ccc(cc1OC1CC1)[C@@H](c1ncc(s1)C(C(F)(F)F)(C(F)(F)F)O)CC1=C[N](=O)C=CC1)F	1	C372H134MgN97O104S5Zn+7	train	ZnMg
2fm5	general	Protein-Ligand	2.03	IC50=43nM	IC50	7.37	2006	camp-specific 3',5'-cyclic phosphodiesterase 4d	M99	Q08499	C23H18F8N2O4S	570.452	570.086	56	59	105.28	5.27	6.4	1	3	10	FC(Oc1ccc(cc1OC1CC1)[C@H](c1ncc(s1)C(C(F)(F)F)(C(F)(F)F)O)Cc1ccc[n+](c1)[O-])F	1	C388H132MgN98O107S5Zn+6	train	ZnMg
2fqo	refined	Protein-Ligand	1.87	Ki=0.37uM	Ki	6.43	2006	s-ribosylhomocysteine lyase	HYI	O34667	C8H17N2O6S	269.295	269.081	34	33	180.03	-3.89	-2.58	5	6	11	ONC(=O)[C@@H]([C@H](CSCC[C@@H](C(=O)O)[NH3+])O)O	1	C362H119CoN95O98S4+10	train	XX
2fqt	refined	Protein-Ligand	1.79	Ki=0.72uM	Ki	6.14	2006	s-ribosylhomocysteine lyase	H1D	O34667	C8H17N2O6S	269.295	269.081	34	33	180.03	-3.89	-2.58	5	6	11	ONC(=O)[C@@H]([C@@H](CSCC[C@@H](C(=O)O)[NH3+])O)O	1	C349H122CoN92O95S4+9	valid	XX
2fsa	general	Protein-Ligand	1.9	Kd=5.0uM	Kd	5.3	2006	bromodomain PHD finger transcription factor	15-mer	Q12830 P68431	C30H60N11O10	734.865	734.452	111	110	364.44	-5.01	-5.34	11	10	33	NC(=O)CC[C@@H](C(=O)N[C@H](C(=O)O)[C@H](O)C)NC(=O)[C@@H](NC(=O)[C@H]([C@H](O)C)NC(=O)[C@@H](NC(=O)[C@@H]([NH3+])C)CCC[NH+]=C(N)N)CCCC[NH+](C)C	1	C196H57N47O62S3Zn+4	train	Zn
2fu8	refined	Protein-Ligand	1.8	Ki=20uM	Ki	4.7	2007	L1 MBL	MCO	P52700	C9H15NO3S	217.285	217.077	29	29	96.41	1.52	0.57	0	3	4	SC[C@H](C(=O)N1CCC[C@@H]1C(=O)O)C	1	C214H84N55O65SZn2+4	valid	Zn
2fv9	general	Protein-Ligand	2.02	IC50=60nM	IC50	7.22	2006	TNT- alpha converting enzyme	002	P78536	C23H35N3O6	449.541	449.253	67	67	144.83	3.49	3.06	4	6	16	CC[C@@H]([C@@H](C(=O)N[C@H](C(=O)O)CC(C)C)NC(=O)[C@H](Cc1ccccc1)CC(=O)NO)C	1	C289H94N76O93S2Zn+7	train	Zn
2fyv	general	Protein-Ligand	1.9	IC50=0.3mM	IC50	3.52	2006	alpha-mannosidase ii	W72	Q24451	C11H22NO9	312.294	312.129	43	43	183.35	-5.57	-4.94	8	9	13	OC[C@H]1[N@H+](C[C@@H]([C@H]([C@@H]([C@@H](C(=O)O)O)O)O)O)C[C@H]([C@@H]1O)O	1	C322H111N87O92SZn+7	train	Zn
2g19	general	Protein-Ligand	1.7	IC50=1.4uM	IC50	5.85	2006	human Hypoxia-Inducible Factor Prolyl Hydroxylase (PHD2)	4HG	Q9GZT9	C12H9IN2O4	372.115	371.961	28	29	99.52	3.04	1.75	2	5	4	Oc1c(ncc2c1cccc2I)C(=O)NCC(=O)O	1	C284H103FeN76O78S3+7	valid	Fe
2g1q	general	Protein-Ligand	2.51	IC50=44nM	IC50	7.36	2006	kinesin-like protein kif11	N9H	P52732	C21H25F2N4O	387.446	387.2	53	55	72.34	2.69	2.79	2	1	8	CCNC(=O)N1N=C(C[C@@]1(CCC[NH3+])c1ccccc1)c1cc(F)ccc1F	1	C279H91MgN71O83S+7	train	Mg
2g6p	general	Protein-Ligand	1.9	IC50=0.6uM	IC50	6.22	2006	methionine aminopeptidase 1	HM2	P53582	C18H17ClN4	324.807	324.114	40	42	50.7	4.13	4.23	1	3	5	Cc1nc(nc(c1Cl)NCCc1ccccc1)c1ccccn1	1	C306H110Co3N81O91S6+7	train	XX
2g83	general	Protein-Ligand	2.8	Kd=1.2uM	Kd	5.92	2006	guanine nucleotide-binding protein g(i), alpha-	GDP	P63096	C10H17N5O11P2	445.216	445.04	45	47	286.07	-5.72	-2.75	4	9	7	O[C@@H]1[C@@H](COP(OP(O)(O)O)(O)O)O[C@H]([C@@H]1O)n1cnc2c1nc(N)[nH]c2=O	1	C313H105MgN91O103S2+8	valid	Mg
2ga2	general	Protein-Ligand	1.95	IC50=3uM	IC50	5.52	2007	human Methionine aminopeptidase 2	A19	P50579	C13H9BrClNO4S	390.637	388.912	30	31	91.85	4.93	4.76	1	4	3	Clc1ccc(cc1)S(=O)(=O)Nc1ccc(cc1C(=O)O)Br	1	C288H108Mn2N75O79S3+5	valid	Mn
2gd8	general	Protein-Ligand	1.46	IC50=39nM	IC50	7.41	2007	Carbonic anhydrase 2	PO1	P00918	C19H28N2O7S2	460.565	460.134	58	61	164.77	2.53	5.28	2	4	5	COc1cc2c(cc1OS(=O)(=O)N)CC[C@@H]1[C@@H]2CC[C@]2([C@H]1CC[C@@H]2OS(=O)(=O)N)C	1	C355H106N89O80SZn+5	valid	Zn
2gg0	general	Protein-Ligand	1.28	IC50=1.7uM	IC50	5.77	2006	Methionine aminopeptidase	U11	P0AE18	C16H21F3N3O5	392.35	392.143	48	48	132.37	0.06	-0.08	4	4	11	COC(=O)CNC(=O)[C@@H](NC(=O)[C@H]([C@@H](c1ccc(cc1)C(F)(F)F)[NH3+])O)C	1	C323H101Co2N88O96S5+7	test	XX
2gg2	general	Protein-Ligand	1	IC50=0.25uM	IC50	6.6	2006	Methionine aminopeptidase	U12	P0AE18	C10H9F3N6	270.214	270.084	28	29	105.44	2.18	4.17	3	1	2	Nc1[nH]nc(c1/N=N/c1cccc(c1)C(F)(F)F)N	1	C259H93Co2N69O78S5+5	train	XX
2gg3	general	Protein-Ligand	1.45	IC50=0.58uM	IC50	6.24	2006	Methionine aminopeptidase	U13	P0AE18	C9H9FN6	220.206	220.087	25	26	105.44	1.4	3.29	3	1	2	Fc1ccc(cc1)/N=N/c1c(N)n[nH]c1N	1	C231H88Co2N63O73S5+4	train	XX
2gg5	general	Protein-Ligand	2.12	IC50=0.25uM	IC50	6.6	2006	Methionine aminopeptidase	U19	P0AE18	C10H9F3N6	270.214	270.084	28	29	105.44	2.18	4.17	3	1	2	Nc1[nH]nc(c1/N=N/c1ccccc1C(F)(F)F)N	1	C251H89Co2N67O73S5+5	train	XX
2gg7	general	Protein-Ligand	1.12	IC50=1.75uM	IC50	5.76	2006	Methionine aminopeptidase	U14	P0AE18	C10H10N6O2	246.225	246.087	28	29	142.74	1.91	2.85	3	3	2	OC(=O)c1cccc(c1)/N=N/c1c(N)n[nH]c1N	1	C269H94Co2N70O79S5+5	train	XX
2gg8	general	Protein-Ligand	1.8	IC50=25uM	IC50	4.6	2006	Methionine aminopeptidase	U15	P0AE18	C20H32N3O5	394.485	394.234	60	60	132.37	1.27	0.63	4	4	13	COC(=O)[C@H](NC(=O)[C@@H](NC(=O)[C@H]([C@@H](c1ccc(cc1)C)[NH3+])O)C)CC(C)C	1	C332H107Co2N87O98S5+7	test	XX
2gg9	general	Protein-Ligand	1.05	IC50=3.5uM	IC50	5.46	2006	Methionine aminopeptidase	U16	P0AE18	C22H36N3O5	422.538	422.265	66	66	132.37	2.03	1.44	4	4	14	COC(=O)[C@H](NC(=O)[C@@H](NC(=O)[C@H]([C@@H](c1ccc(cc1)C(C)C)[NH3+])O)C)CC(C)C	1	C334H105Co2N84O96S5+7	valid	XX
2ggb	general	Protein-Ligand	2.13	IC50=12uM	IC50	4.92	2006	Methionine aminopeptidase	U17	P0AE18	C17H30N3O6	372.437	372.213	56	55	152.6	-0.52	-1.67	5	5	16	OC[C@@H](C(=O)N[C@H](C(=O)OC)CC(C)C)NC(=O)[C@H]([C@@H](CC#CC)[NH3+])O	1	C332H104Co2N85O95S5+6	train	XX
2ggu	general	Protein-Ligand	1.9	IC50=0.94mM	IC50	3.03	2006	pulmonary surfactant-associated protein d	MLR	P35247	C18H32O16	504.437	504.169	66	68	268.68	-6.88	-7.57	11	11	18	OC[C@H]1O[C@H](O[C@@H]2[C@@H](CO)O[C@H]([C@@H]([C@H]2O)O)O)[C@@H]([C@H]([C@@H]1O[C@H]1O[C@H](CO)[C@H]([C@@H]([C@H]1O)O)O)O)O	1	C138H48CaN42O50S2+3	test	Ca
2ggx	general	Protein-Ligand	1.9	IC50=0.32mM	IC50	3.49	2006	pulmonary surfactant-associated protein d	NPJ	P35247	C18H25NO13	463.39	463.133	57	59	224.35	-2.55	-2.88	7	9	13	OC[C@H]1O[C@H](Oc2ccc(cc2)N(=O)=O)[C@@H]([C@H]([C@@H]1O[C@H]1O[C@H](CO)[C@H]([C@@H]([C@H]1O)O)O)O)O	1	C168H59CaN50O59S+3	test	Ca
2gh6	general	Protein-Ligand	2.2	IC50=11.19uM	IC50	4.95	2007	histone deacetylase-like amidohydrolase FB188	CF3	Q70I53	C15H18F3NO2	301.304	301.129	39	39	46.17	3.6	4.17	1	2	9	O=C(Nc1ccccc1)CCCCCCC(=O)C(F)(F)F	1	C256H86N76O76S4Zn+2	train	Zn
2gkl	refined	Protein-Ligand	1.86	Ki=4.5uM	Ki	5.35	2007	zinc carbapenemase CPHA	PD2	P26918	C7H5NO4	167.119	167.022	17	17	87.49	2.11	0.48	0	5	0	OC(=O)c1ccnc(c1)C(=O)O	1	C207H75N59O60SZn+5	valid	Zn
2gm1	general	Protein-Ligand	2.3	IC50=0.10uM	IC50	7	2006	kinesin-related motor protein eg5	2AZ	P52732	C28H31ClN5O2	505.031	504.217	67	71	87.25	4.25	3.73	1	2	10	[NH3+]CCCN([C@@H](c1nn2ccc(c2c(=O)n1Cc1ccccc1)Cl)C1CC1)C(=O)c1ccc(cc1)C	1	C313H106MgN78O94S+7	train	Mg
2go4	general	Protein-Ligand	2.7	IC50=7uM	IC50	5.15	2006	udp-3-o-[3-hydroxymyristoyl] n-acetylglucosamin	TUX	O67648	C22H41NO7	431.563	431.288	71	71	125.32	4.38	3.25	4	5	21	CCCCCCCCCCCCCC(=O)O[C@@H]1[C@H](CO[C@@H]([C@H]1O)CO)CC(=O)NO	1	C362H126N104O103Zn2+12	test	Zn
2gsu	refined	Protein-Ligand	2	Ki=260uM	Ki	3.59	2006	phosphodiesterase-nucleotide pyrophosphatase	AMP	Q8PIS1	C10H15N5O7P	348.229	348.071	38	40	202.82	-3.71	-1.72	3	8	5	O[C@@H]1[C@H](O)[C@H](O[C@H]1n1cnc2c1ncnc2N)COP(O)(O)O	1	C318H97N91O86SZn2+9	test	Zn
2gvd	general	Protein-Ligand	2.9	Ki=100nM	Ki	7	2006	Adenylate cyclase	128	P04896 P26769 P30803	C16H20N8O19P3	721.293	721.006	66	70	444.84	-5.15	-0.05	1	16	7	Nc1ncnc2c1ncn2[C@@H]1O[C@@H]([C@@H]2[C@H]1O[C@@]1(O2)[C@H](C=C(C=C1N(=O)=O)N(=O)=O)N(=O)=O)COP(OP(OP(O)(O)O)(O)O)(O)O	1	C337H128Mn2N87O98S3+8	valid	Mn
2gvv	refined	Protein-Ligand	1.73	Ki=125uM	Ki	3.9	2006	phosphotriesterase	DI9	Q7SIG4	C10H20NO3P	233.244	233.118	35	36	71.36	1.26	3.67	1	1	4	NP(=O)(OC1CCCC1)OC1CCCC1	1	C258H100CaN79O90S3+4	train	Ca
2gzl	refined	Protein-Ligand	2.5	Kd=15uM	Kd	4.82	2006	2-c-methyl-d-erythritol 2,4-cyclodiphosphate	2AA	P62617	C23H33N5O13P2S	681.546	681.127	77	80	304.18	-2.96	1.07	4	9	15	O[C@@H]1[C@@H](COP(OP(OCCNS(=O)(=O)c2cccc3c2cccc3N(C)C)(O)O)(O)O)O[C@H]([C@@H]1O)n1ccc(nc1=O)N	1	C374H130N101O108S2Zn+10	train	Zn
2h15	refined	Protein-Ligand	1.9	Ki=2135nM	Ki	5.67	2007	Carbonic anhydrase 2	B19	P00918	C12H22N2O7S	338.377	338.115	44	46	126.72	-1.15	1.35	2	2	3	NS(=O)(=O)NC[C@]12OC[C@@H]3[C@H]([C@@H]2OC(O1)(C)C)OC(O3)(C)C	1	C315H96N79O67S2Zn+5	test	Zn
2h42	general	Protein-Ligand	2.3	IC50=2.4nM	IC50	8.62	2006	cgmp-specific 3',5'-cyclic phosphodiesterase	VIA	O76074	C22H31N6O4S	475.584	475.213	64	67	123	1.48	2.78	2	4	7	CCCc1nn(c2c1nc([nH]c2=O)c1cc(ccc1OCC)S(=O)(=O)N1CC[NH+](CC1)C)C	1	C391H138MgN104O109S5Zn+8	train	ZnMg
2h44	general	Protein-Ligand	1.8	IC50=1.7uM	IC50	5.77	2006	cgmp-specific 3',5'-cyclic phosphodiesterase	7CA	O76074	C27H30O10	514.521	514.184	67	70	159.05	3.47	2.59	5	6	11	COc1ccc(cc1)c1oc2c(CC=C(C)C)c(O)cc(c2c(=O)c1O[C@@H]1O[C@@H](C)[C@@H]([C@H]([C@H]1O)O)O)O	1	C457H149MgN128O128S6Zn+11	train	ZnMg
2h4n	refined	Protein-Ligand	1.9	Kd=2nM	Kd	8.7	1997	carbonic anhydrase ii	AZM	P00918	C4H6N4O3S2	222.245	221.988	19	19	151.66	-1.23	1	2	5	3	CC(=O)Nc1nnc(s1)S(=O)(=O)N	1	C326H98N77O75S2Zn2+3	valid	Zn
2h5a	general	Protein-Ligand	1.72	Kd=8uM	Kd	5.1	2006	phosphomannomutase/phosphoglucomutase	X1P	P26276	C5H12O8P	231.118	231.027	26	26	153.43	-3.78	-2.9	3	6	4	O[C@@H]1CO[C@@H]([C@@H]([C@H]1O)O)OP(O)(O)O	1	C247H113N79O89PSZn+12	valid	Zn
2haw	refined	Protein-Ligand	1.75	Kd=12uM	Kd	4.92	2006	Manganese-dependent inorganic pyrophosphatase	2PN	P37487	H7NO6P2	179.006	178.975	16	15	160.59	-3.79	-1.72	1	6	0	OP(NP(O)(O)O)(O)O	1	C251H115Mg4N71O80S3+7	train	Mg
2hd1	general	Protein-Ligand	2.23	IC50=500uM	IC50	3.3	2006	phosphodiesterase 9a	IBM	O76083	C10H14N4O2	222.244	222.112	30	31	72.68	0.95	0.08	1	3	2	CC(Cn1c(=O)n(C)c(=O)c2c1nc[nH]2)C	1	C254H101MgN70O72S3Zn+5	valid	ZnMg
2hd6	general	Protein-Ligand	1.8	Ki=16nM	Ki	7.8	2006	carbonic anhydrase ii	BOS	P00918	C13H12N2O3S2	308.376	308.029	32	33	136.44	1.47	3.73	2	3	5	O=C(c1ccccc1S)Nc1ccc(cc1)S(=O)(=O)N	1	C334H100N86O75S2Zn+7	valid	Zn
2hf8	general	Protein-Ligand	2.1	Kd=3.4uM	Kd	5.47	2006	probable hydrogenase nickel incorporation protein hypb	GSP	Q57884	C10H19N5O13P3S	542.27	541.991	51	53	367.92	-5.84	-2.13	4	10	11	O[C@@H]1[C@@H](COP(OP(OP(S)(O)O)(O)O)(O)O)O[C@H]([C@@H]1O)n1cnc2c1nc(N)[nH]c2=O	1	C347H136MgN89O114Se4+7	train	Mg
2hh5	general	Protein-Ligand	1.8	Ki=0.032uM	Ki	7.49	2006	cathepsin s	GNQ	P25774	C25H31F3N4O6S	572.597	572.192	70	72	134.45	2.72	4.4	3	4	14	C[C@H](NC(=O)[C@H](CS(=O)(=O)Cc1ccccc1)NC(=O)N1CCOCC1)CNc1ccc(cc1)OC(F)(F)F	1	C282H76N75O80S4Zn2+3	test	Zn
2hl4	refined	Protein-Ligand	1.55	Ki=23nM	Ki	7.64	2007	human carbonic anhydrase II	BO1	P00918	C12H18N2O7S	334.346	334.083	40	41	170.72	-1.66	-0.6	6	6	8	OC[C@H]1O[C@@H](Nc2ccc(cc2)S(=O)(=O)N)[C@@H]([C@H]([C@@H]1O)O)O	1	C303H95N76O64Zn+5	train	Zn
2hnc	refined	Protein-Ligand	1.55	Ki=60nM	Ki	7.22	2006	human carbonic anhydrase II	1SA	P00918	C2H5N4O2S2	181.217	180.985	15	15	149.83	0.57	0.55	1	3	1	Nc1[nH+]nc(s1)S(=O)(=O)N	1	C282H89N71O62SZn+4	train	Zn
2hoc	refined	Protein-Ligand	2.1	Ki=0.3nM	Ki	9.52	2006	human carbonic anhydrase II	1CN	P00918	C8H7ClFN5O4S3	387.819	386.933	29	30	203.13	0.17	3.88	3	6	4	Fc1cc(cc(c1N)Cl)S(=O)(=O)Nc1nnc(s1)S(=O)(=O)N	1	C304H98N80O68Zn+6	valid	Zn
2hu6	refined	Protein-Ligand	1.32	Kd=154uM	Kd	3.81	2006	macrophage metalloelastase	37A	P39900	C20H21N3O5	383.398	383.148	49	52	100.13	1.04	2.21	3	3	8	ONC(=O)N1C[C@@H]2O[C@H](C1)O[C@H]2C(=O)NCc1ccc(cc1)c1ccccc1	1	C305H97CaN76O80SZn+8	valid	ZnCa
2hwg	general	Protein-Ligand	2.7	Ki=0.28mM	Ki	3.55	2006	phosphoenolpyruvate-protein phosphotransferase	OXL	P08839	C2H2O4	90.035	89.995	8	7	74.6	1.52	-0.84	0	4	0	OC(=O)C(=O)O	1	C190H77MgN55O64S+8	valid	Mg
2hzy	refined	Protein-Ligand	1.35	Ki=41nM	Ki	7.39	2006	Fumarylacetoacetase	DHJ	P35505	C7H12O7P	239.14	239.032	27	26	145.72	0.08	-0.66	0	7	5	OC(=O)CCP(CC(=O)CC(=O)O)(O)O	1	C307H98MnN76O90S5+4	test	Mn
2i19	refined	Protein-Ligand	2.28	Ki=16nM	Ki	7.8	2006	farnesyl pyrophosphate synthase	1BY	Q86C09	C7H14N2O6P2	284.143	284.033	31	31	173.48	-2.09	-0.63	1	7	3	OP(C(P(O)(O)O)CNc1ccccn1)(O)O	1	C310H113Mg3N78O98S5+7	train	Mg
2i47	general	Protein-Ligand	1.9	IC50=2.2nM	IC50	8.66	2006	adam 17	KGY	P78536	C22H27N3O8S2	525.595	525.124	62	64	172.87	0.95	3.93	2	7	11	CC#CCOc1ccc(cc1)S(=O)(=O)CC1(CCN(CC1)S(=O)(=O)c1c(C)noc1C)C(=O)NO	1	C304H93N75O87S3Zn+6	train	Zn
2ie4	general	Protein-Ligand	2.6	IC50=0.1nM	IC50	10	2006	Protein Phosphatase 2	OKA	P30153 P67775	C44H68O13	805.003	804.466	125	131	182.83	4.29	5.21	4	6	13	CC1=C[C@]2(O[C@@H](C1)[C@@H](/C=C/[C@H]1CC[C@]3(O1)CC[C@@H]1[C@@H](O3)[C@H](O)C(=C)[C@H](O1)[C@H](C[C@@H]([C@H]1O[C@@]3(CCCCO3)CC[C@H]1C)C)O)C)O[C@@H](CC[C@H]2O)C[C@](C(=O)O)(O)C	1	C267H97Mn2N87O82S4+8	train	Mn
2ilp	general	Protein-Ligand	1.9	IC50=15uM	IC50	4.82	2007	(BoNT/A-LC)Clostridium botulinum Neurotoxin Serotype A Light Chain	GB5	P0DPI0	C9H8ClNO2	197.618	197.024	21	21	49.33	1.76	2.25	2	2	4	ONC(=O)/C=C/c1ccc(cc1)Cl	1	C269H92N65O73SZn+8	test	Zn
2ima	general	Protein-Ligand	1.94	Ki=300nM	Ki	6.52	2007	(BoNT/A-LC)Clostridium botulinum Neurotoxin Serotype A Light Chain	GB4	Q84GJ4 P0DPI0	C9H7Cl2NO2	232.063	230.985	21	21	49.33	2.39	2.9	2	2	4	ONC(=O)/C=C/c1ccc(cc1Cl)Cl	1	C282H94N68O76SZn+8	test	Zn
2imb	general	Protein-Ligand	2.41	IC50=60uM	IC50	4.22	2007	(BoNT/A-LC)Clostridium botulinum Neurotoxin Serotype A Light Chain	AHL	P0DPI0	C6H17N5O2	191.231	191.138	30	29	142.98	-0.55	-2.97	3	2	7	ONC(=O)[C@H](CCC[NH+]=C(N)N)[NH3+]	1	C226H86N55O62SZn+7	train	Zn
2ioa	general	Protein-Ligand	2.8	Ki=3.2uM	Ki	5.49	2006	bifunctional glutathionylspermidine	GGA	P0AES0	C17H41N5O9P2	521.483	521.238	74	73	277.78	-7.85	-2.86	5	8	19	[NH3+]CCCC[NH2+]CCCC[P@@](=O)(OP(O)(O)O)CNC(=O)[C@H](NC(=O)CC[C@H](C(=O)O)[NH3+])C	1	C362H135Mg2N103O114S5+9	train	Mg
2isv	general	Protein-Ligand	2.3	Ki=37nM	Ki	7.43	2006	Putative fructose-1,6-bisphosphate aldolase	PGH	O97447	C2H7NO6P	172.054	172.001	17	16	132.84	-2.86	-1.45	2	5	4	ONC(=O)COP(O)(O)O	1	C227H90N73O74S3Zn+8	test	Zn
2isw	refined	Protein-Ligand	1.75	Ki=37nM	Ki	7.43	2006	Putative fructose-1,6-bisphosphate aldolase	PGH	O97447	C2H7NO6P	172.054	172.001	17	16	132.84	-2.86	-1.45	2	5	4	ONC(=O)COP(O)(O)O	1	C244H98N74O75S5Zn+9	train	Zn
2it4	general	Protein-Ligand	2	Ki=24.1mM	Ki	1.62	2007	Carbonic anhydrase 1	PPF	P00915	CH4O5P	127.013	126.98	11	10	111.58	-1.26	-0.6	0	5	0	OC(=O)P(O)(O)O	1	C244H83N64O52Zn+7	valid	Zn
2j83	general	Protein-Ligand	2	IC50=61uM	IC50	4.21	2006	ulilysin	BAT	Q8TL28	C23H31N3O4S2	477.64	477.176	63	64	161.07	3.55	4.27	4	4	16	CNC(=O)[C@@H](NC(=O)[C@@H]([C@@H](C(=O)NO)CSc1cccs1)CC(C)C)Cc1ccccc1	1	C334H113N84O95S2Zn+8	train	Zn
2j9a	general	Protein-Ligand	1.73	IC50=1.3uM	IC50	5.89	2006	cytosol aminopeptidase	5-mer	P00727	C38H58N5O9	728.895	728.423	110	111	233.24	3.28	2.82	7	9	28	CCCCCCC[C@H]([C@@H](C(=O)N[C@H](C(=O)N([C@H](C(=O)N[C@H](C(=O)N[C@H](C(=O)O)Cc1ccc(cc1)O)Cc1ccc(cc1)O)CC(C)C)C)C)O)[NH3+]	1	C401H151N117O129S8Zn2+8	train	Zn
2jbj	general	Protein-Ligand	2.19	Ki=0.2nM	Ki	9.7	2006	GLUTAMATE CARBOXYPEPTIDASE 2	G88	Q04609	C6H12O7P	227.129	227.032	26	25	148.88	0.27	-0.71	0	7	3	OC(=O)CC[C@@H](C(=O)O)CP(O)(O)O	1	C275H100N78O87Zn2+7	test	Zn
2jbk	general	Protein-Ligand	2.99	Ki=0.4uM	Ki	6.4	2006	GLUTAMATE CARBOXYPEPTIDASE 2	QUS	Q04609	C5H8N3O5	190.134	190.046	21	21	132.94	-3	-3.18	2	4	2	OC(=O)[C@H](Cn1oc(=O)[nH]c1=O)[NH3+]	1	C263H93N75O80Zn2+9	train	Zn
2jbl	general	Protein-Ligand	2.4	IC50=1.3uM	IC50	5.89	2007	PHOTOSYNTHETIC REACTION CENTER FROM BLASTOCHLORIS VIRIDIS	SMA	P06008 P06009 P06010 P07173	C30H42O7	514.65	514.293	79	80	87.36	6.31	6.14	1	2	14	C/C=C(/C=C/C=C/[C@@H]([C@H]([C@H]([C@H](CCc1oc2c(O)c(OC)cc(c2c(=O)c1C)OC)C)OC)C)OC)\C	1	C392H131FeN106O106S+9	test	Fe
2jdh	general	Protein-Ligand	1.1	Kd=0.31uM	Kd	6.51	2007	FUCOSE-BINDING LECTIN PA-IIL	3-mer	Q9HYN5	C17H28N4O10	448.425	448.181	59	61	208.88	-5.04	-3.87	7	9	13	OC[C@H]1O[C@@H](n2nnc(c2)CO)[C@@H]([C@H]([C@@H]1O[C@@H]1O[C@@H](C)[C@H]([C@H]([C@@H]1O)O)O)O)NC(=O)C	1	C127H53Ca2N41O60+	test	Ca
2jdk	general	Protein-Ligand	1.1	Kd=0.29uM	Kd	6.54	2007	FUCOSE-BINDING LECTIN PA-IIL	3-mer	Q9HYN5	C18H28N4O11	476.435	476.175	61	63	214.95	-4	-3.58	6	9	13	OC[C@H]1O[C@@H](n2nnc(c2)C(=O)OC)[C@@H]([C@H]([C@@H]1O[C@@H]1O[C@@H](C)[C@H]([C@H]([C@@H]1O)O)O)O)NC(=O)C	1	C127H50Ca2N41O59+	valid	Ca
2jdm	refined	Protein-Ligand	1.7	Kd=3.96uM	Kd	5.4	2007	FUCOSE-BINDING LECTIN PA-IIL(S22A)	MFU	Q9HYN5	C7H14O5	178.183	178.084	26	26	79.15	-1.55	-1.54	3	3	4	CO[C@@H]1O[C@@H](C)[C@H]([C@H]([C@@H]1O)O)O	1	C121H53Ca2N40O56+	train	Ca
2jdn	general	Protein-Ligand	1.3	Kd=2.78uM	Kd	5.56	2007	FUCOSE-BINDING LECTIN PA-IIL(S22A)	MMA	Q9HYN5	C7H14O6	194.182	194.079	27	27	99.38	-2.05	-2.57	4	4	6	CO[C@H]1O[C@H](CO)[C@H]([C@@H]([C@@H]1O)O)O	1	C121H53Ca2N40O56+	train	Ca
2jdp	refined	Protein-Ligand	1.3	Kd=0.25uM	Kd	6.6	2007	FUCOSE-BINDING LECTIN PA-IIL(S23A)	MFU	Q9HYN5	C7H14O5	178.183	178.084	26	26	79.15	-1.55	-1.54	3	3	4	CO[C@@H]1O[C@@H](C)[C@H]([C@H]([C@@H]1O)O)O	1	C130H58Ca2N43O61+	train	Ca
2jdu	refined	Protein-Ligand	1.5	Kd=0.19uM	Kd	6.72	2007	FUCOSE-BINDING LECTIN PA-IIL(G24N)	MFU	Q9HYN5	C7H14O5	178.183	178.084	26	26	79.15	-1.55	-1.54	3	3	4	CO[C@@H]1O[C@@H](C)[C@H]([C@H]([C@@H]1O)O)O	1	C124H57Ca2N40O59+	train	Ca
2jdy	general	Protein-Ligand	1.7	Kd=42.9uM	Kd	4.37	2007	FUCOSE-BINDING LECTIN PA-IIL(G24N)	MMA	Q9HYN5	C7H14O6	194.182	194.079	27	27	99.38	-2.05	-2.57	4	4	6	CO[C@H]1O[C@H](CO)[C@H]([C@@H]([C@@H]1O)O)O	1	C123H54Ca2N41O58+	train	Ca
2jew	refined	Protein-Ligand	1.4	Ki=206nM	Ki	6.69	2007	CARBOXYPEPTIDASE B	720	P09955	C12H22N3O2	240.322	240.171	39	39	82.76	-0.64	0.56	1	3	7	CCCn1cnc(c1)C[C@@H](C(=O)O)CCC[NH3+]	1	C312H95N80O91S2Zn+5	valid	Zn
2jke	refined	Protein-Ligand	1.7	Ki=59uM	Ki	4.23	2008	BtGH97a	NOJ	G8JZS4	C6H14NO4	164.18	164.092	25	25	97.53	-2.35	-2.42	5	4	5	OC[C@H]1[NH2+]C[C@@H]([C@H]([C@@H]1O)O)O	1	C247H94CaN63O71S+5	test	Ca
2jkp	refined	Protein-Ligand	1.99	Ki=59uM	Ki	4.23	2008	BtGH97a	CTS	G8JZS4	C8H16NO4	190.217	190.108	29	30	85.36	-2.24	-2.33	5	4	4	O[C@@H]1[C@@H](O)C[N@@H+]2[C@@H]([C@H]1O)[C@@H](O)CC2	1	C240H94CaN59O74S+4	train	Ca
2jnp	general	Protein-Ligand	NMR	Ki=130nM	Ki	6.89	2007	Matrix metalloproteinase-3	NGH	P08254	C13H18N2O5S	314.357	314.094	39	39	101.49	1.69	2.72	0	4	7	O=NC(=O)CN(S(=O)(=O)c1ccc(cc1)OC)CC(C)C	1	C284H91CaN68O70SZn+6	train	ZnCa
2jsd	general	Protein-Ligand	NMR	Kd=17nM	Kd	7.77	2007	Matrix metalloproteinase-20	NGH	O60882	C13H18N2O5S	314.357	314.094	39	39	101.49	1.69	2.72	0	4	7	O=NC(=O)CN(S(=O)(=O)c1ccc(cc1)OC)CC(C)C	1	C235H71CaN57O57SZn+6	train	ZnCa
2jt5	general	Protein-Ligand	NMR	Ki=18nM	Ki	7.74	2008	human MMPs	JT5	P08254	C16H16N2O5S	348.374	348.078	40	41	112.49	1.33	2.71	1	5	8	OCCN(S(=O)(=O)c1ccc(cc1)c1ccccc1)CC(=O)N=O	1	C299H93CaN75O74SZn+7	test	ZnCa
2jt6	general	Protein-Ligand	NMR	Ki=25nM	Ki	7.6	2008	human MMPs	JT6	P08254	C16H14N2O3	282.294	282.1	35	36	82.35	2	2.89	2	3	7	ONC(=O)CCOc1ccc(cc1)c1ccc(cc1)C#N	1	C306H93N80O80SZn+8	train	Zn
2k2g	general	Protein-Ligand	NMR	Kd=7.5nM	Kd	8.12	2008	MMP-12	DSV	P39900	C17H17NO4S2	363.451	363.06	41	43	120.09	5.09	4.91	1	4	4	CC([C@@H](C(=O)O)NS(=O)(=O)c1ccc2c(c1)sc1c2cccc1)C	1	C198H59N50O48SZn+5	train	Zn
2ke1	general	Protein-Ligand	NMR	Kd=5uM	Kd	5.3	2009	First PHD Finger of Autoimmune Regulator	10-mer	O43918	C46H92N19O15	1151.34	1150.7	172	171	617.92	-6.5	-8.78	16	15	52	[NH3+]CCCC[C@@H](C(=O)N[C@H](C(=O)N[C@H](C(=O)N[C@H](C(=O)N[C@H](C(=O)N[C@H](C(=O)N[C@H](C(=O)O)CO)CCCC[NH3+])CCC[NH+]=C(N)N)C)[C@H](O)C)CCC(=O)N)NC(=O)[C@H]([C@H](O)C)NC(=O)[C@@H](NC(=O)[C@@H]([NH3+])C)CCC[NH+]=C(N)N	1	C184H59N55O58S7Zn2+4	train	Zn
2l75	general	Protein-Ligand	NMR	Kd=0.9uM	Kd	6.05	2011	Chromodomain-helicase-DNA-binding protein 4(CHD4-PHD2)	14-mer	Q14839 P68431	C53H105N20O17	1294.52	1293.8	195	194	639.61	-6.38	-8.06	17	17	58	[NH3+]CCCC[C@@H](C(=O)N[C@H](C(=O)N[C@H](C(=O)N[C@H](C(=O)N[C@H](C(=O)N[C@H](C(=O)N[C@H](C(=O)N[C@H](C(=O)O)[C@H](O)C)CO)CCCC[N+](C)(C)C)CCC[NH+]=C(N)N)C)[C@H](O)C)CCC(=O)N)NC(=O)[C@H]([C@H](O)C)NC(=O)[C@@H](NC(=O)[C@@H]([NH3+])C)CCC[NH+]=C(N)N	1	C157H49N44O45S6Zn+6	train	Zn
2l98	general	Protein-Ligand	NMR	Kd=243uM	Kd	3.61	2011	Troponin C, slow skeletal and cardiac muscles	STL	P63316	C14H12O3	228.243	228.079	29	30	60.69	3.13	2.97	3	3	5	Oc1ccc(cc1)/C=C/c1cc(O)cc(c1)O	1	C214H68CaN48O59S4+6	test	Ca
2m3z	general	Protein-Ligand	NMR	Kd=0.27uM	Kd	6.57	2013	NUCLEOCAPSID PROTEIN P7	1HF	P12497	C16H12N4O6S2	420.42	420.02	40	43	207.35	1.37	3.25	2	5	2	O=C1N/C(=N/N=C\2/C(=O)Nc3c2cc(cc3)S(O)(O)O)/S/C/1=C\c1ccco1	1	C168H51N57O42S4Zn+11	train	Zn
2mas	refined	Protein-Ligand	2.3	Kd=30nM	Kd	7.52	1997	purine nucleoside hydrolase	PIR	Q27546	C11H17N2O3	225.264	225.124	33	34	103.32	-0.88	0.12	5	3	5	OC[C@H]1[NH2+][C@H]([C@@H]([C@@H]1O)O)c1ccc(cc1)N	1	C293H105CaN85O91S5+3	test	Ca
2mpa	general	Protein-Ligand	2.6	Kd=9.1nM	Kd	8.04	1999	mn12h2 igg2a-kappa	9-mer	E6MXW0 Q569X1 P01863 A2NHM3 P01837	C63H86N15O23S	1453.51	1452.57	188	191	681.05	-5.49	0.34	19	22	53	[NH3+]CCCC[C@@H](C(=O)N[C@H](C(=O)N[C@H](C(=O)N[C@H](C(=O)N[C@H](C(=O)N[C@H](C(=O)N[C@H](C(=O)N[C@H](C(=O)N)CSCC(=O)Nc1ccc(c(c1)C(=O)O)C1c2ccc(cc2Oc2c1ccc(c2)O)O)CC(C)C)CC(=O)N)CC(=O)N)CC(=O)N)[C@H](O)C)CC(=O)O)NC(=O)[C@H]([C@H](O)C)NC(=O)C	1	C287H87CdN75O79S+5	train	XX
2nmx	refined	Protein-Ligand	1.55	Kd=2.7uM	Kd	5.57	2007	Carbonic Anhydrase I	M25	P00915	C10H14N2O3S	242.295	242.073	30	30	97.64	0.06	2.18	2	3	5	CC(=O)NCCc1ccc(cc1)S(=O)(=O)N	1	C299H96N79O69Zn+7	test	Zn
2nn1	refined	Protein-Ligand	1.65	Kd=1.5uM	Kd	5.82	2007	Carbonic anhydrase 1	M28	P00915	C9H11NO4S	229.253	229.041	26	26	105.84	1.69	2.13	1	4	3	OC(=O)CCc1ccc(cc1)S(=O)(=O)N	1	C318H100N82O72Zn+7	train	Zn
2nn7	refined	Protein-Ligand	1.85	Kd=0.3uM	Kd	6.52	2007	Carbonic anhydrase 1	M29	P00915	C11H15NO4S	257.306	257.072	32	32	94.84	0.94	2.61	1	3	6	CCOC(=O)CCc1ccc(cc1)S(=O)(=O)N	1	C330H104N89O79Zn+9	train	Zn
2nng	general	Protein-Ligand	1.2	Kd=4.4uM	Kd	5.36	2007	Carbonic anhydrase 2	ZYX	P00918	C8H13N2O2S	201.266	201.07	26	26	96.18	-0.19	0.9	2	2	3	[NH3+]CCc1ccc(cc1)S(=O)(=O)N	1	C293H94N74O67Zn+5	train	Zn
2nno	general	Protein-Ligand	1.01	Kd=0.4uM	Kd	6.4	2007	Carbonic anhydrase 2	M28	P00918	C9H11NO4S	229.253	229.041	26	26	105.84	1.69	2.13	1	4	3	OC(=O)CCc1ccc(cc1)S(=O)(=O)N	1	C295H94N75O66Zn+5	train	Zn
2nns	general	Protein-Ligand	1.03	Kd=0.9uM	Kd	6.05	2007	Carbonic anhydrase 2	M25	P00918	C10H14N2O3S	242.295	242.073	30	30	97.64	0.06	2.18	2	3	5	CC(=O)NCCc1ccc(cc1)S(=O)(=O)N	1	C301H91N81O69Zn+6	valid	Zn
2nnv	general	Protein-Ligand	1.1	Kd=0.03uM	Kd	7.52	2007	Carbonic anhydrase 2	M29	P00918	C11H15NO4S	257.306	257.072	32	32	94.84	0.94	2.61	1	3	6	CCOC(=O)CCc1ccc(cc1)S(=O)(=O)N	1	C340H101N86O75SZn+6	valid	Zn
2nq6	general	Protein-Ligand	1.5	IC50=1.5uM	IC50	5.82	2006	methionine aminopeptidase 1	HM4	P53582	C14H16N4O3S	320.367	320.094	38	39	121.45	2.5	3.28	2	4	7	O=C(OC(C)(C)C)Nc1cccnc1C(=O)Nc1nccs1	1	C292H100Co3N77O84S6+7	valid	XX
2nq7	general	Protein-Ligand	1.6	IC50=2.9uM	IC50	5.54	2006	methionine aminopeptidase 1	HM5	P53582	C14H16N4O2S	304.367	304.099	37	38	112.22	2.51	2.92	2	4	6	O=C(C(C)(C)C)Nc1cccnc1C(=O)Nc1nccs1	1	C282H106Co3N75O84S6+7	test	XX
2o1v	general	Protein-Ligand	2.45	Kd=5uM	Kd	5.3	2007	GRP94	ADP	P41148	C10H17N5O10P2	429.217	429.045	44	46	266.1	-4.89	-2.04	3	10	7	O[C@@H]1[C@@H](COP(OP(O)(O)O)(O)O)O[C@H]([C@@H]1O)n1cnc2c1ncnc2N	1	C195H74MgN50O61S+6	train	Mg
2o3z	general	Protein-Ligand	2.25	Kd=2uM	Kd	5.7	2007	UDP-3-O-[3-hydroxymyristoyl] N-acetylglucosamine deacetylase	AI7	O67648	C14H20O3	236.307	236.141	37	37	46.53	5.38	3.73	0	2	7	CCCCCCCOc1cccc(c1)C(=O)O	1	C333H121N95O97Zn+13	valid	Zn
2o4h	general	Protein-Ligand	2.7	Ki=300nM	Ki	6.52	2007	Aspartoacylase	AS9	P45381	C5H11NO6P	212.118	212.032	24	23	140.68	0.03	-0.73	1	6	3	OC(=O)C[C@@H](C(=O)O)NP(O)(O)C	1	C257H104N69O78S2Zn+5	test	Zn
2o4z	refined	Protein-Ligand	2.1	Ki=566nM	Ki	6.25	2007	human carbonic anhydrase II	HSW	P00918	H4N2O3S	112.108	111.994	10	9	100.8	-1.83	0.34	3	3	2	ONS(=O)(=O)N	1	C272H91N70O65SZn+4	train	Zn
2o8h	refined	Protein-Ligand	1.8	Ki=25nM	Ki	7.6	2007	Phosphodiesterase-10A	227	Q9QYJ6	C24H30N5O4S	484.591	484.202	64	68	97.68	2.43	3.38	1	4	5	COc1cc2ncnc(c2cc1OC)N1CCc2c(C1)c(ccc2)S(=O)(=O)N1CC[NH+](CC1)C	1	C386H140MgN93O110S8Zn+5	train	ZnMg
2oaz	general	Protein-Ligand	1.9	Ki=2nM	Ki	8.7	2007	human MetAP2	I96	P50579	C16H18N4S2	330.471	330.097	40	42	107.14	5.04	5.1	2	2	6	CC(c1ccccc1Nc1n[nH]c(n1)SCc1cccs1)C	1	C326H117Co2N83O89S4+7	valid	XX
2oc2	refined	Protein-Ligand	2.25	Ki=3nM	Ki	8.52	2007	Angiotensin-converting enzyme, somatic isoform	RX3	P12821	C33H37N3O7P	618.637	618.237	81	85	174.57	4.93	5.56	3	6	14	O=C(N[C@H](P([C@@H]1CCC[C@H]1C(=O)N[C@H](C(=O)O)Cc1c[nH]c2c1cccc2)(O)O)Cc1ccccc1)OCc1ccccc1	1	C513H168N129O136S5Zn+10	train	Zn
2oi0	refined	Protein-Ligand	2	Ki=28nM	Ki	7.55	2007	TNF-a Converting Enzyme (TACE)	283	P78536	C14H17NO3S2	311.42	311.065	37	38	93.79	2.15	2.8	0	2	6	CC#CCOc1ccc(cc1)S(=O)(=O)N1CC[C@@H](C1)S	1	C267H84N69O76S3Zn+7	train	Zn
2oi2	refined	Protein-Ligand	2.5	Kd=500nM	Kd	6.3	2007	Mevalonate kinase	DP6	A0A0H2UNK6	C6H16O10P2	310.133	310.022	34	33	204.32	-2.03	-1.05	1	8	7	OC(=O)C[C@@](CCOP(OP(O)(O)O)(O)O)(O)C	1	C257H99MgN73O82S6+5	test	Mg
2oq6	general	Protein-Ligand	2	IC50=250uM	IC50	3.6	2007	human JMJD2A (jumonji domain containing 2A, KDM4A)	OGA	O75164 P68431	C4H5NO5	147.086	147.017	15	14	103.7	0.63	-1.34	1	5	2	OC(=O)CNC(=O)C(=O)O	1	C272H94N64NiO78S2+4	train	XX
2or4	general	Protein-Ligand	1.62	IC50=9.5uM	IC50	5.02	2007	Glutamate carboxypeptidase	QUS	Q04609	C5H8N3O5	190.134	190.046	21	21	132.94	-3	-3.18	2	4	2	OC(=O)[C@H](Cn1oc(=O)[nH]c1=O)[NH3+]	1	C267H96N72O84Zn2+6	test	Zn
2ork	general	Protein-Ligand	1.89	IC50=1.4mM	IC50	2.85	2007	Pulmonary surfactant-associated protein D	IPD	P35247	C6H14O9P	261.144	261.038	30	30	184.66	-4.97	-4.16	5	8	6	O[C@H]1[C@H](OP(O)(O)O)[C@H](O)[C@@H]([C@H]([C@@H]1O)O)O	1	C118H44CaN35O44S2+2	train	Ca
2os9	general	Protein-Ligand	1.7	IC50=5.7mM	IC50	2.24	2007	Pulmonary surfactant-associated protein D	INS	P35247	C6H12O6	180.156	180.063	24	24	121.38	-3.71	-3.83	6	6	6	O[C@@H]1[C@H](O)[C@H](O)[C@H]([C@@H]([C@H]1O)O)O	1	C116H43CaN34O41S+2	valid	Ca
2osf	general	Protein-Ligand	1.6	Ki=148uM	Ki	3.83	2008	CA II	TH0	P00918	C6H6O2S	142.176	142.009	15	15	79.26	1.36	1.39	2	2	3	Oc1ccc(c(c1)O)S	1	C274H89N70O59SZn+5	valid	Zn
2osm	general	Protein-Ligand	1.6	Ki=0.631uM	Ki	6.2	2008	CA II	HTS	P00918	C6H6OS	126.176	126.014	14	14	59.03	1.72	1.68	1	1	2	Oc1ccccc1S	1	C278H91N71O63SZn+5	test	Zn
2ou7	general	Protein-Ligand	2.4	IC50=155uM	IC50	3.81	2007	Serine/threonine-protein kinase PLK1	ANP	P53350	C10H20N6O12P3	509.22	509.035	51	53	332.18	-6.35	-2.4	4	12	9	O[C@@H]1[C@@H](COP(OP(NP(O)(O)O)(O)O)(O)O)O[C@H]([C@@H]1O)n1cnc2c1ncnc2N	1	C251H91Mg2N69O63S2+9	train	Mg
2ovv	refined	Protein-Ligand	2	Ki=12nM	Ki	7.92	2007	Phosphodiesterase-10A	PFH	Q9QYJ6	C24H23N3O3	401.458	401.174	53	57	56.71	5.05	4.52	0	2	5	COc1cc2c(cc1OC)ncnc2N1CC[C@H](C1)Oc1ccc2c(c1)cccc2	1	C341H118MgN82O98S4Zn+4	train	ZnMg
2ovx	general	Protein-Ligand	2	IC50=2nM	IC50	8.7	2007	Matrix metalloproteinase-9	4MR	P14780	C24H23N6O4	459.477	459.178	57	61	117.96	2.22	2.53	3	5	5	O=C1NC(=O)C(C(=O)N1)([NH+]1CCN(CC1)c1ncccn1)c1ccc(cc1)Oc1ccccc1	1	C288H90CaN68O75S2Zn+6	train	ZnCa
2ovy	refined	Protein-Ligand	1.8	Ki=4nM	Ki	8.4	2007	Phosphodiesterase-10A	PFJ	Q9QYJ6	C22H21N5O3	403.434	403.164	51	55	82.49	3.42	3.31	0	4	5	COc1cc2c(cc1OC)ncnc2N1CC[C@H](C1)Oc1cnc2c(n1)cccc2	1	C368H123MgN92O105S6Zn+5	train	ZnMg
2ovz	general	Protein-Ligand	2	Ki=13nM	Ki	7.89	2007	Matrix metalloproteinase-9	5MR	P14780	C30H30N4O5P	557.557	557.195	70	74	168.06	2.81	4.44	3	5	12	O=C([C@@H](CP(c1ccccc1)(O)O)Cc1onc(c1)c1ccccc1)N[C@H](C(=O)N)Cc1c[nH]c2c1cccc2	1	C318H96CaN77O83S2Zn2+8	train	ZnCa
2ow0	general	Protein-Ligand	2	IC50=201nM	IC50	6.7	2007	Matrix metalloproteinase-9	6MR	P14780	C23H19IN2O4S	546.377	546.011	50	53	107.64	5.76	5.89	2	4	6	OC(=O)[C@H](NS(=O)(=O)c1ccc(cc1)c1ccc(cc1)I)Cc1c[nH]c2c1cccc2	1	C281H83CaN68O71S2Zn+7	train	ZnCa
2ow1	general	Protein-Ligand	2.2	IC50=1nM	IC50	9	2007	Matrix metalloproteinase-9	7MR	P14780	C16H16F3N2O5S	405.369	405.073	43	44	128.72	1.57	2.77	3	4	8	ONC(=O)[C@@](C(F)(F)F)(CS(=O)(=O)c1ccc(cc1)Oc1ccccc1)[NH3+]	1	C277H83CaN66O68S2Zn+6	train	ZnCa
2ow2	general	Protein-Ligand	2.9	IC50=6nM	IC50	8.22	2007	Matrix metalloproteinase-9	8MR	P14780	C11H12F2O5S	294.272	294.037	31	31	89.05	2.99	2.66	0	4	5	COc1ccc(cc1)S(=O)(=O)[C@@H](C(F)F)CC(=O)O	1	C255H76N61O60S2Zn+5	test	Zn
2ow9	general	Protein-Ligand	1.74	IC50=30nM	IC50	7.52	2007	MMP13	SP6	P45452	C21H16N2O4S	392.428	392.083	44	47	98.02	2.94	2.93	0	3	6	O=C(c1cn2c(s1)cc(=O)n(c2=O)Cc1ccccc1)OCc1ccccc1	1	C280H85N66O72S2Zn+7	train	Zn
2p09	refined	Protein-Ligand	1.65	Kd=450nM	Kd	6.35	2007	non-biological ATP binding protein with two mutations N32D and D65V	ATP		C10H19N5O13P3	510.205	510.019	50	52	329.38	-6.07	-2.36	3	12	9	O[C@@H]1[C@@H](COP(OP(OP(O)(O)O)(O)O)(O)O)O[C@H]([C@@H]1O)n1cnc2c1ncnc2N	1	C200H73N60O60S4Zn+8	valid	Zn
2p1c	general	Protein-Ligand	2.45	Ki=21nM	Ki	7.68	2008	FPPS	GG3	Q86C09	C14H28NO7P2	384.322	384.134	52	52	173.23	-3.57	-0.96	2	7	9	C[N@@H+](CCC(P(O)(O)O)(P(O)(O)O)O)CCCCc1ccccc1	1	C368H150Mg3N96O120S4+9	train	Mg
2p53	refined	Protein-Ligand	2.1	Ki=35nM	Ki	7.46	2007	N-acetylglucosamine-6-phosphate deacetylase	NNG	P0AF18	C7H19NO10P2	339.174	339.048	39	39	219.51	-5.37	-3.18	4	8	7	O[C@H]1O[C@H](COP(O)(O)O)[C@H]([C@@H]([C@H]1NP(O)(O)C)O)O	1	C310H116N89O93S2Zn+7	train	Zn
2p98	general	Protein-Ligand	1.7	IC50=0.64uM	IC50	6.19	2007	Methionine aminopeptidase	YE7	P0AE18	C12H11N4O	227.242	227.093	28	30	74.04	1.88	0.77	2	2	2	[NH3+]NC(=O)c1cn2c(n1)c1ccccc1cc2	1	C263H87MnN70O75S5+5	train	Mn
2p99	general	Protein-Ligand	1.8	IC50=1.16uM	IC50	5.94	2007	Methionine aminopeptidase	YE6	P0AE18	C11H7ClN2O2	234.638	234.02	23	24	66.42	4.15	3.87	0	1	3	N=NC(=O)c1ccc(o1)c1ccccc1Cl	1	C233H82MnN63O68S5+5	train	Mn
2p9a	general	Protein-Ligand	1.6	IC50=6.56uM	IC50	5.18	2007	Methionine aminopeptidase	YE6	P0AE18	C11H7ClN2O2	234.638	234.02	23	24	66.42	4.15	3.87	0	1	3	N=NC(=O)c1ccc(o1)c1ccccc1Cl	1	C220H85Mn2N59O67S5+5	train	Mn
2pcu	general	Protein-Ligand	1.6	IC50=910uM	IC50	3.04	2007	Carboxypeptidase A4	5-mer	Q9UI42	C29H47N9O7	633.74	633.36	92	93	281.65	-0.88	-1.75	5	7	20	NC(=O)C[C@@H](C(=O)N[C@H](C(=O)N1CCC[C@H]1C(=O)N[C@H](C(=O)O)C(C)C)CCC[NH+]=C(N)N)NC(=O)[C@H](Cc1ccccc1)[NH3+]	1	C281H93N75O89S2Zn+5	train	Zn
2piy	general	Protein-Ligand	1.43	IC50=20nM	IC50	7.7	2008	Carboxypeptidase B	528	P09955	C23H35N2O6PS	498.573	498.195	68	69	173.54	0.69	3.43	2	6	12	[NH3+]Cc1cccc(c1)[C@@H](C(=O)O)CP([C@H](C(C)C)NS(=O)(=O)CCCc1ccccc1)(O)O	1	C352H112N91O106S2Zn+6	valid	Zn
2piz	general	Protein-Ligand	1.6	IC50=170nM	IC50	6.77	2008	Carboxypeptidase B	606	P09955	C19H26N3O4P	391.401	391.166	53	54	157.36	4.1	1.71	0	4	8	OC(=O)[C@H](c1cccc(c1)[NH+]=C(N)N)CP(CCCc1ccccc1)(O)O	1	C337H108N85O102S2Zn+5	train	Zn
2pj0	general	Protein-Ligand	1.65	IC50=8.1nM	IC50	8.09	2008	Carboxypeptidase B	922	P09955	C21H29N4O7P	480.451	480.177	62	63	204.92	4.32	2.26	1	5	11	O=C(N[C@H](P(O[C@@H](c1cccc(c1)[NH+]=C(N)N)C(=O)O)(O)O)C(C)C)OCc1ccccc1	1	C313H99N82O97S2Zn+5	test	Zn
2pj1	general	Protein-Ligand	1.64	IC50=9.7nM	IC50	8.01	2008	Carboxypeptidase B	578	P09955	C21H29N2O7P	452.438	452.171	60	61	166.55	0.31	2.62	2	5	11	[NH3+]Cc1cccc(c1)[C@@H](C(=O)O)OP([C@H](C(C)C)NC(=O)OCc1ccccc1)(O)O	1	C371H112N94O114S2Zn+6	valid	Zn
2pj2	general	Protein-Ligand	1.95	IC50=12nM	IC50	7.92	2008	Carboxypeptidase B	864	P09955	C22H31N2O6P	450.465	450.192	62	63	157.32	0.49	2.73	2	5	11	[NH3+]Cc1cccc(c1)[C@@H](C(=O)O)CP([C@H](C(C)C)NC(=O)OCc1ccccc1)(O)O	1	C361H108N92O111S2Zn+6	valid	Zn
2pj3	general	Protein-Ligand	1.64	IC50=6.6nM	IC50	8.18	2008	Carboxypeptidase B	86A	P09955	C22H31N4O6P	478.479	478.198	64	65	195.69	4.32	2.08	1	5	11	O=C(N[C@H](P(O[C@@H](c1cccc(c1)[NH+]=C(N)N)C(=O)O)(O)O)C(C)C)CCc1ccccc1	1	C326H103N86O103S2Zn+6	train	Zn
2pj4	general	Protein-Ligand	2	IC50=13nM	IC50	7.89	2008	Carboxypeptidase B	414	P09955	C24H33N4O7P	520.515	520.209	69	71	204.92	5.36	3.19	1	5	11	O=C(N[C@H](P(O[C@@H](c1cccc(c1)[NH+]=C(N)N)C(=O)O)(O)O)C1CCCCC1)OCc1ccccc1	1	C350H116N89O110S4Zn+5	test	Zn
2pj5	general	Protein-Ligand	1.65	IC50=15nM	IC50	7.82	2008	Carboxypeptidase B	11B	P09955	C23H33N4O7P	508.504	508.209	68	69	204.92	5.33	3.19	1	5	14	CCCCC[C@@H](P(O[C@@H](c1cccc(c1)[NH+]=C(N)N)C(=O)O)(O)O)NC(=O)OCc1ccccc1	1	C259H100N69O84S4Zn+5	train	Zn
2pj6	general	Protein-Ligand	1.6	IC50=49nM	IC50	7.31	2008	Carboxypeptidase B	059	P09955	C22H33N2O6PS	484.546	484.18	65	66	173.54	0.33	3.04	2	6	11	[NH3+]Cc1cccc(c1)[C@@H](C(=O)O)CP([C@H](C(C)C)NS(=O)(=O)CCc1ccccc1)(O)O	1	C363H106N94O106S2Zn+7	train	Zn
2pj7	general	Protein-Ligand	1.77	IC50=17nM	IC50	7.77	2008	Carboxypeptidase B	235	P09955	C20H29N2O6PS	456.493	456.148	59	60	173.54	-0.06	2.86	2	6	9	[NH3+]Cc1cccc(c1)[C@@H](C(=O)O)CP([C@H](C(C)C)NS(=O)(=O)c1ccccc1)(O)O	1	C341H99N87O101S2Zn+6	train	Zn
2pj8	general	Protein-Ligand	1.7	IC50=18nM	IC50	7.74	2008	Carboxypeptidase B	17A	P09955	C26H33N2O6PS	532.589	532.18	69	71	173.54	1.56	4.53	2	6	10	[NH3+]Cc1cccc(c1)[C@@H](C(=O)O)CP([C@H](C(C)C)NS(=O)(=O)c1ccc(cc1)c1ccccc1)(O)O	1	C330H99N85O100S2Zn+5	train	Zn
2pj9	general	Protein-Ligand	1.56	IC50=12nM	IC50	7.92	2008	Carboxypeptidase B	281	P09955	C20H27N4O6PS2	514.555	514.111	60	62	227.56	-0.19	2.87	2	8	9	[NH3+]Cc1cccc(c1)[C@@H](C(=O)O)CP([C@H](C(C)C)NS(=O)(=O)c1cccc2c1nsn2)(O)O	1	C335H99N87O100S2Zn+6	train	Zn
2pja	general	Protein-Ligand	1.7	IC50=2.2nM	IC50	8.66	2008	Carboxypeptidase B	33Z	P09955	C31H40N5O7P	625.652	625.267	84	86	224.79	5.83	3.49	2	6	16	O=C(N[C@H](C(=O)N[C@H](P(C[C@@H](c1cccc(c1)[NH+]=C(N)N)C(=O)O)(O)O)C(C)C)Cc1ccccc1)OCc1ccccc1	1	C360H116N97O108S4Zn+7	test	Zn
2pjb	general	Protein-Ligand	1.7	IC50=19nM	IC50	7.72	2008	Carboxypeptidase B	983	P09955	C31H42N3O8PS	647.719	647.243	86	88	211.87	1.61	4.73	3	7	17	[NH3+]Cc1cccc(c1)[C@@H](C(=O)O)CP([C@H](C(C)C)NS(=O)(=O)C[C@H](Cc1ccccc1)NC(=O)OCc1ccccc1)(O)O	1	C334H109N79O103S2Zn+3	train	Zn
2pjc	general	Protein-Ligand	1.74	IC50=1.9nM	IC50	8.72	2008	Carboxypeptidase B	343	P09955	C30H38N5O9P	643.625	643.241	83	85	254.25	5.3	3.09	3	7	17	O=C(N[C@H](C(=O)N[C@H](P(O[C@@H](c1cccc(c1)[NH+]=C(N)N)C(=O)O)(O)O)C(C)C)Cc1ccc(cc1)O)OCc1ccccc1	1	C353H116N89O110S5Zn+5	train	Zn
2pjt	general	Protein-Ligand	2.8	IC50=860nM	IC50	6.07	2008	catalytic domain of MMP-13	347	P45452	C22H31N3O6S	465.563	465.193	63	64	133.42	1.76	3.9	3	5	12	CC#CCNc1ccc(cc1)S(=O)(=O)CC1(CCN(CC1)C(=O)OC(C)(C)C)C(=O)NO	1	C309H96CaN68O82S2Zn+4	train	ZnCa
2pll	general	Protein-Ligand	1.9	Kd=5nM	Kd	8.3	2007	arginase-1	ABH	P05089	C6H17BNO5	194.014	194.12	30	29	125.63	-2.59	-2.18	4	5	8	OC(=O)[C@H](CCC[CH3][B](O)(O)O)[NH3+]	1	C245H86Mn2N73O86S+4	train	Mn
2pnc	general	Protein-Ligand	2.4	Ki=466uM	Ki	3.33	2008	BPAO	CLU	Q29437	C9H10Cl2N3	231.102	230.025	24	25	38.03	1.87	0.91	0	0	1	Clc1cccc(c1[NH+]=C1NCCN1)Cl	1	C255H95CuN69O75S2+7	test	XX
2pnx	general	Protein-Ligand	1.8	Kd=7.9uM	Kd	5.1	2008	Inhibitor of growth protein 4( ING4) PHD domain	12-mer	Q9UNL4	C53H105N20O16	1278.53	1277.8	194	193	619.38	-5.05	-7.95	17	16	59	[NH3+]CCCC[C@@H](C(=O)N[C@H](C(=O)N[C@@H]([C@H](O)C)C=O)CO)NC(=O)[C@@H](NC(=O)[C@@H](NC(=O)[C@H]([C@H](O)C)NC(=O)[C@@H](NC(=O)[C@@H](NC(=O)[C@H]([C@H](O)C)NC(=O)[C@@H](NC(=O)[C@@H]([NH3+])C)CCC[NH+]=C(N)N)CCCC[N+](C)(C)C)CCC(=O)N)C)CCC[NH+]=C(N)N	1	C108H34N24O30S3Zn+	train	Zn
2pou	refined	Protein-Ligand	1.6	Ki=38nM	Ki	7.42	2007	Carbonic anhydrase 2	I7A	P00918	C6H6Cl2N2O4S2	305.159	303.915	22	22	137.08	0.31	3.85	2	4	2	Clc1cc(cc(c1Cl)S(=O)(=O)N)S(=O)(=O)N	1	C300H96N77O65SZn+6	train	Zn
2pov	refined	Protein-Ligand	1.6	Ki=75nM	Ki	7.12	2007	Carbonic anhydrase 2	I7B	P00918	C6H8ClN3O4S2	285.728	284.964	24	24	163.1	-0.45	3.36	3	4	2	Nc1cc(Cl)c(cc1S(=O)(=O)N)S(=O)(=O)N	1	C310H94N80O70SZn+5	test	Zn
2pow	refined	Protein-Ligand	1.75	Ki=63nM	Ki	7.2	2007	Carbonic anhydrase 2	I7C	P00918	C7H8F3N3O4S2	319.281	318.991	27	27	163.1	-0.19	3.73	3	4	2	Nc1cc(c(cc1S(=O)(=O)N)S(=O)(=O)N)C(F)(F)F	1	C319H99N81O72SZn+7	train	Zn
2ptz	refined	Protein-Ligand	1.65	Ki=15nM	Ki	7.82	2007	Enolase	PAH	Q38BV6	C2H7NO5P	156.054	156.006	16	15	123.61	-2.91	-1.38	2	5	3	ONC(=O)CP(O)(O)O	1	C198H94N67O78S2Zn2+6	valid	Zn
2pu0	general	Protein-Ligand	1.9	Ki=15nM	Ki	7.82	2007	Enolase	PAH	Q38BV6	C2H7NO5P	156.054	156.006	16	15	123.61	-2.91	-1.38	2	5	3	ONC(=O)CP(O)(O)O	1	C243H101N77O92S4Zn2+7	test	Zn
2pu1	refined	Protein-Ligand	1.8	Ki=1.4uM	Ki	5.85	2007	Enolase	FSG	Q9NDH8	C2H6FNO5P	174.045	173.997	16	15	123.61	-2.43	-1.08	2	5	3	ONC(=O)[C@H](P(O)(O)O)F	1	C182H93N64O75S2Zn2+7	test	Zn
2pvv	general	Protein-Ligand	2.11	IC50=438uM	IC50	3.36	2007	Glutamate carboxypeptidase	OSE	Q04609	C3H7NO6S	185.156	184.999	18	17	156.37	-0.31	0.35	0	5	2	OC(=O)C(=N)COS(O)(O)O	1	C259H96N72O74Zn2+8	valid	Zn
2pvw	general	Protein-Ligand	1.71	IC50=0.3nM	IC50	9.52	2007	Glutamate carboxypeptidase	G88	Q04609	C6H12O7P	227.129	227.032	26	25	148.88	0.27	-0.71	0	7	3	OC(=O)CC[C@@H](C(=O)O)CP(O)(O)O	1	C275H102N78O87Zn2+7	train	Zn
2pze	general	Protein-Ligand	1.7	Kd=0.84uM	Kd	6.08	2007	human CFTR 387-646(Del 405-436)	ATP	P13569	C10H19N5O13P3	510.205	510.019	50	52	329.38	-6.07	-2.36	3	12	9	O[C@@H]1[C@@H](COP(OP(OP(O)(O)O)(O)O)(O)O)O[C@H]([C@@H]1O)n1cnc2c1ncnc2N	1	C171H56MgN43O51S2+3	train	Mg
2q1q	refined	Protein-Ligand	1.9	Ki=7nM	Ki	8.15	2007	Carbonic anhydrase 2	OSP	P00918	C10H14N2O4S2	290.359	290.039	32	33	114.3	0.12	3.19	1	4	2	O=S1(=O)CCCCN1c1ccc(cc1)S(=O)(=O)N	1	C299H93N76O64Zn+5	train	Zn
2q2y	general	Protein-Ligand	2.5	IC50=1.6nM	IC50	8.8	2007	Kinesin-like protein KIF11	MKR	P52732	C27H33FN4O3	480.574	480.254	68	72	75.77	3.21	3.02	1	2	7	CC(=O)[C@H]1N=[N]2[C@H]([C@@]1(CCC[NH+]1CCN(CC1)C(=O)C)c1ccccc1)COc1c2cc(F)cc1	1	C339H109MgN90O103S+8	train	Mg
2q2z	general	Protein-Ligand	3	IC50=2.0nM	IC50	8.7	2007	Kinesin-like protein KIF11	MKK	P52732	C27H35FN4O2	466.591	466.274	69	72	66.54	3.8	3.57	1	2	8	CC(=O)[C@@H]1N=[N](C[C@@]1(CCC[NH+]1CCN(CC1)C(=O)C)c1ccccc1)c1cc(C)ccc1F	1	C310H100MgN79O95S+6	test	Mg
2q38	refined	Protein-Ligand	1.95	Ki=5950nM	Ki	5.23	2007	human carbonic anhydrase II	LSA	P00918	C7H5NO3S	183.184	182.999	17	18	71.62	0.4	1.53	1	3	0	O=C1NS(=O)(=O)c2c1cccc2	1	C279H87N72O64SZn+4	train	Zn
2q80	general	Protein-Ligand	2.7	Ki=25uM	Ki	4.6	2007	Geranylgeranyl pyrophosphate synthetase	GRG	O95749	C20H38O7P2	452.459	452.209	67	66	146.79	4.18	5.48	0	5	13	C/C(=C\CC/C(=C/COP(OP(O)(O)O)(O)O)/C)/CC/C=C(/CCC=C(C)C)\C	1	C532H167Mg2N141O149S4+11	train	Mg
2q92	general	Protein-Ligand	1.9	IC50=1.1uM	IC50	5.96	2008	E. coli methionine aminopeptidase Mn-form	B23	P0AE18	C11H7NO5	233.177	233.032	24	25	96.26	3.12	3.08	0	4	1	OC(=O)c1ccc(o1)c1ccccc1N(=O)=O	1	C240H86Mn2N65O72S5+5	test	Mn
2q93	general	Protein-Ligand	1.6	IC50=0.56uM	IC50	6.25	2008	E. coli methionine aminopeptidase Mn-form	B21	P0AE18	C12H10O4	218.205	218.058	26	27	59.67	3.27	2.65	0	2	2	COc1ccccc1c1ccc(o1)C(=O)O	1	C227H84Mn2N61O69S5+5	train	Mn
2q94	general	Protein-Ligand	1.63	IC50=0.37uM	IC50	6.43	2008	E. coli methionine aminopeptidase Mn-form	A04	P0AE18	C12H7F3O4	272.177	272.03	26	27	59.67	4.48	3.54	0	2	2	OC(=O)c1ccc(o1)c1ccccc1OC(F)(F)F	1	C218H89Mn2N59O65S5+5	train	Mn
2q95	general	Protein-Ligand	1.7	IC50=1.6uM	IC50	5.8	2008	E. coli methionine aminopeptidase Mn-form	A05	P0AE18	C11H6ClNO5	267.622	266.993	24	25	96.26	3.75	3.73	0	4	1	Clc1cc(ccc1c1ccc(o1)C(=O)O)N(=O)=O	1	C227H84Mn2N59O68S5+5	test	Mn
2q96	general	Protein-Ligand	1.6	IC50=1.2uM	IC50	5.92	2008	E. coli methionine aminopeptidase Mn-form	A18	P0AE18	C12H9ClO3	236.651	236.024	25	26	50.44	4.22	3.22	0	2	2	Clc1ccccc1Cc1ccc(o1)C(=O)O	1	C260H88Mn2N69O76S5+6	train	Mn
2q9y	general	Protein-Ligand	2.85	Ki=36uM	Ki	4.44	2008	Trichodiene synthase	BTM	P13513	C13H22N	192.32	192.175	36	36	0	2.87	3.06	0	0	5	CC[N+](Cc1ccccc1)(CC)CC	1	C327H118Mg3N86O89S5+6	test	Mg
2qdt	refined	Protein-Ligand	2	Ki=6.5uM	Ki	5.19	2007	L1–Zn2	I38	P52700	C6H11NO3S	177.221	177.046	22	21	105.2	0.64	0.29	1	3	5	C[C@H](C(=O)O)NC(=O)CCS	1	C201H80N54O60SZn2+5	train	Zn
2qic	general	Protein-Ligand	2.1	Kd=3.3uM	Kd	5.48	2008	Inhibitor of growth protein 1	12-mer	Q9UK53	C40H80N16O12	977.163	976.614	148	147	484.21	-4.6	-5.48	12	12	43	NC(=O)CC[C@@H](C(=O)N[C@H](C(=O)N[C@H](C(=O)N[C@H](C(=O)O)CCC[NH+]=C(N)N)C)[C@H](O)C)NC(=O)[C@@H](NC(=O)[C@H]([C@H](O)C)NC(=O)[C@@H](NC(=O)[C@@H]([NH3+])C)CCC[NH+]=C(N)N)CCCC[N+](C)(C)C	1	C178H50N44O48S5Zn+4	valid	Zn
2qo8	general	Protein-Ligand	1.4	Ki=3.4nM	Ki	8.47	2008	Carbonic anhydrase 2	3CC	P00918	C17H26N2O3S	338.465	338.166	49	50	97.64	3	4.31	2	3	8	CCCC(C(=O)N[C@H]1Cc2c(C1)ccc(c2)S(=O)(=O)N)CCC	1	C324H98N83O77SZn+5	train	Zn
2qoa	general	Protein-Ligand	1.6	Ki=52nM	Ki	7.28	2008	Carbonic anhydrase 2	MAJ	P00918	C9H11NO2S	197.254	197.051	24	25	68.54	1.32	2.6	1	2	1	NS(=O)(=O)c1ccc2c(c1)CCC2	1	C311H91N77O70SZn+4	valid	Zn
2qp6	general	Protein-Ligand	1.45	Ki=208nM	Ki	6.68	2008	hCA II	MB1	P00918	C6H5ClN2O4S	236.633	235.966	19	19	114.36	0.94	3.2	1	4	1	O=N(=O)c1ccc(c(c1)S(=O)(=O)N)Cl	1	C297H93HgN75O67SZn+4	train	Zn
2qpj	general	Protein-Ligand	2.05	IC50=0.45uM	IC50	6.35	2007	Neprilysin	I20	P08473	C25H38N5O7P	551.572	551.251	76	77	221.29	-2.29	0.35	3	8	15	N#C[C@@H]1CCCN1C(=O)[C@H](CCC(=O)N[C@H](P(C[C@H](C(=O)N[C@H](C(=O)O)C)Cc1ccccc1)(O)O)C)[NH3+]	1	C406H143N115O112SZn+8	valid	Zn
2qta	refined	Protein-Ligand	1.85	Kd=1.75uM	Kd	5.76	2007	Pyruvate dehydrogenase E1 component	TDP	P0AFG8	C12H21N4O7P2S	427.33	427.061	47	48	231.76	-1.41	1.34	1	7	7	Cc1ncc(c(n1)N)Cn1csc(c1C)CCOP(OP(O)(O)O)(O)O	1	C402H146MgN111O126S4+6	valid	Mg
2qx0	general	Protein-Ligand	1.8	Kd=0.78uM	Kd	6.11	2007	7,8-dihydro-6-hydroxymethylpterin-pyrophosphokinase	PH2	A0A5P8YCA3	C7H9N5O2	195.179	195.076	23	24	116.39	-1.99	-1	4	2	2	Nc1nc2NCC(=Nc2c(=O)[nH]1)CO	1	C229H85Mg2N70O65S+7	valid	Mg
2qyk	general	Protein-Ligand	2.1	IC50=3.3uM	IC50	5.48	2008	PDE4A	NPV	P27815	C21H13N3O4	371.346	371.091	41	44	108.9	4.88	5.09	0	6	2	OC(=O)c1ccc(cc1)c1cc2cccnc2c(n1)c1cccc(c1)N(=O)=O	1	C303H115MgN80O87S5Zn+6	train	ZnMg
2qyl	general	Protein-Ligand	1.95	IC50=0.65uM	IC50	6.19	2008	PDE4B	NPV	Q07343	C21H13N3O4	371.346	371.091	41	44	108.9	4.88	5.09	0	6	2	OC(=O)c1ccc(cc1)c1cc2cccnc2c(n1)c1cccc(c1)N(=O)=O	1	C326H121MgN86O92S3Zn+8	valid	ZnMg
2qyn	general	Protein-Ligand	1.57	IC50=0.57uM	IC50	6.24	2008	PDE4D	NPV	Q08499	C21H13N3O4	371.346	371.091	41	44	108.9	4.88	5.09	0	6	2	OC(=O)c1ccc(cc1)c1cc2cccnc2c(n1)c1cccc(c1)N(=O)=O	1	C330H123MgN87O92S5Zn+7	train	ZnMg
2r23	refined	Protein-Ligand	1.65	Kd=190uM	Kd	3.72	2008	Fab, antibody fragment (IgG1k)	2-mer	Q52L64 P01837	C19H30O16	514.432	514.153	65	66	273.36	-2.17	-5.53	8	12	17	C=CCO[C@@]1(C[C@@H](O[C@]2(O[C@H]([C@@H](CO)O)[C@@H]([C@@H]([C@@H]2O)O)O)C(=O)O)[C@H]([C@H](O1)[C@@H](CO)O)O)C(=O)O	1	C225H75N66O64Zn+9	valid	Zn
2r2l	general	Protein-Ligand	2.23	IC50=1nM	IC50	9	2008	rat PFT	PB9	Q02293 Q04631	C28H33N7O4S	563.671	563.231	73	77	133.04	2.24	3.87	0	6	9	COC(=O)N1CCC(CC1)CN(S(=O)(=O)c1ccccn1)[C@@H]1CN(Cc2cncn2C)c2c(C1)cc(cc2)C#N	1	C469H150N124O130S6Zn+10	train	Zn
2r59	refined	Protein-Ligand	1.89	Ki=6.5nM	Ki	8.19	2008	Leukotriene A-4 hydrolase	PH0	P09960	C27H33N2O5P	496.535	496.213	68	70	148.09	1.42	2.69	2	5	12	O=C([C@@H](CP([C@H](Cc1ccccc1)[NH3+])(O)O)Cc1ccccc1)N[C@H](C(=O)O)Cc1ccccc1	1	C415H155N108O118S4Zn+8	train	Zn
2r8q	general	Protein-Ligand	1.5	IC50=580uM	IC50	3.24	2007	Class I phosphodiesterase PDEB1	IBM	Q6S996	C10H14N4O2	222.244	222.112	30	31	72.68	0.95	0.08	1	3	2	CC(Cn1c(=O)n(C)c(=O)c2c1nc[nH]2)C	1	C250H93MgN67O69S2Zn+6	train	ZnMg
2rfh	refined	Protein-Ligand	1.7	Ki=0.15uM	Ki	6.82	2008	Carboxypeptidase A1	23N	P00730	C10H11NO4	209.199	209.069	26	26	83.12	2.71	1.73	0	4	3	OC(=O)[C@@H](CN(=O)=O)Cc1ccccc1	1	C279H96N72O80Zn+4	test	Zn
2ri9	refined	Protein-Ligand	1.95	Ki=0.6mM	Ki	3.22	2008	Mannosyl-oligosaccharide alpha-1,2-mannosidase	LDY	P31723	C5H10O4	134.13	134.058	19	19	69.92	-2	-1.9	3	3	3	O[C@@H]1[C@H](O)COC[C@H]1O	1	C221H93CaN57O71+5	test	Ca
2ria	general	Protein-Ligand	1.8	IC50=2.7mM	IC50	2.57	2008	Pulmonary surfactant-associated protein D	289	P35247	C7H14O7	210.182	210.074	28	28	130.61	-3.21	-3.86	6	6	8	OC[C@H]([C@H]1O[C@H](O)[C@H]([C@H]([C@@H]1O)O)O)O	1	C116H43CaN34O41S+2	train	Ca
2rib	general	Protein-Ligand	1.8	IC50=1.5mM	IC50	2.82	2008	Pulmonary surfactant-associated protein D	GMH	P35247	C7H14O7	210.182	210.074	28	28	130.61	-3.21	-3.86	6	6	8	OC[C@@H]([C@H]1O[C@H](O)[C@H]([C@H]([C@@H]1O)O)O)O	1	C124H46CaN37O46S+2	train	Ca
2rio	refined	Protein-Ligand	2.4	Kd=20.4uM	Kd	4.69	2008	Serine/threonine-protein kinase/endoribonuclease IRE1	ADP	P32361	C10H17N5O10P2	429.217	429.045	44	46	266.1	-4.89	-2.04	3	10	7	O[C@@H]1[C@@H](COP(OP(O)(O)O)(O)O)O[C@H]([C@@H]1O)n1cnc2c1ncnc2N	1	C307H92MgN81O83S3Sr+7	valid	Mg
2rjp	general	Protein-Ligand	2.8	IC50=0.1uM	IC50	7	2007	ADAMTS-4	886	O75173	C28H31NO6S	509.614	509.187	67	69	118.15	6.55	6.63	1	5	10	O=C(c1ccc(cc1)OCc1ccc(cc1)c1ccc(cc1)S(=O)(=O)N[C@@H](C(=O)O)C(C)C)C(C)C	1	C359H116CaN99O105S7Zn+7	test	ZnCa
2rk7	general	Protein-Ligand	1.9	Ki=89uM	Ki	4.05	2008	PEPCK-Mn2+	OXL	P07379	C2H2O4	90.035	89.995	8	7	74.6	1.52	-0.84	0	4	0	OC(=O)C(=O)O	1	C182H69MnN51O49S5+5	test	Mn
2rk8	refined	Protein-Ligand	2	Ki=230uM	Ki	3.64	2008	PEPCK-Mn2+	PPF	P07379	CH4O5P	127.013	126.98	11	10	111.58	-1.26	-0.6	0	5	0	OC(=O)P(O)(O)O	1	C223H88MnN62O59S4+6	train	Mn
2rka	refined	Protein-Ligand	1.95	Ki=1mM	Ki	3	2008	PEPCK-Mn2+	PGA	P07379	C2H6O6P	157.039	156.99	15	14	120.81	-1.24	-1.26	0	5	1	OC(=O)COP(O)(O)O	1	C210H73MnN57O56S5+5	train	Mn
2rkd	refined	Protein-Ligand	1.9	Ki=1.9mM	Ki	2.72	2008	PEPCK-Mn2+	3PP	P07379	C3H8O5P	155.066	155.011	17	16	111.58	-0.82	-0.8	0	5	1	OC(=O)CCP(O)(O)O	1	C209H77MnN58O59S5+5	train	Mn
2rke	refined	Protein-Ligand	1.8	Ki=82.5uM	Ki	4.08	2008	PEPCK-Mn2+	SAT	P07379	C2H6O5S	142.131	141.994	14	13	123.29	-0.33	0.29	0	5	0	OC(=O)CS(O)(O)O	1	C213H78MnN60O59S5+5	train	Mn
2srt	general	Protein-Ligand	NMR	Ki=0.23uM	Ki	6.64	1995	stromelysin-1	INH	P08254	C25H36N6O4	484.591	484.28	71	72	178.12	2.3	0.15	3	4	15	NC(=[NH+]CCC[C@@H](C(=O)Nc1ccccc1)NC(=O)[C@@H]([NH2+][C@@H](C(=O)O)C)CCc1ccccc1)N	1	C281H85N69O74SZn+5	test	Zn
2tmn	refined	Protein-Ligand	1.6	Ki=1.3uM	Ki	5.89	1989	thermolysin	0FA	P00800	C6H16N2O4P	211.176	211.085	29	28	129.4	-1.33	0.22	2	4	4	CC(C[C@@H](C(=O)N)NP(O)(O)O)C	1	C246H88CaN64O80SZn+3	train	ZnCa
2toh	general	Protein-Ligand	2.3	Ki=70uM	Ki	4.15	1999	tyrosine 3-monooxygenase	HBI	P04177	C9H13N5O3	239.231	239.102	30	31	136.62	-2.21	-1.25	5	3	4	C[C@@H]([C@@H](C1=Nc2c(NC1)nc([nH]c2=O)N)O)O	1	C252H91FeN63O78S2+5	valid	Fe
2tpi	refined	Protein-Ligand	2.1	Kd=49uM	Kd	4.31	1982	trypsinogen	2-mer	P00974 P00760	C11H23N2O3	231.312	231.171	39	38	94.04	-0.08	0.26	2	3	6	CC[C@@H]([C@@H](C(=O)N[C@H](C(=O)O)C(C)C)[NH3+])C	1	C232H77HgN64O73S4+6	valid	XX
2usn	refined	Protein-Ligand	2.2	Ki=0.31uM	Ki	6.51	1998	stromelysin-1	IN8	P08254	C19H18N4O3S2	414.501	414.082	46	48	160.25	3.04	4.29	2	4	11	O=C(C[C@H](c1ccccc1)NC(=O)OCc1ccccc1)Nc1nnc(s1)S	1	C261H76N64O60SZn2+6	train	Zn
2uz9	refined	Protein-Ligand	2.3	Ki=1.96uM	Ki	5.71	2007	Human Guanine Deaminase (Guad)	XAN	Q9Y2T3	C5H4N4O2	152.111	152.033	15	16	94.4	-0.75	-1.06	3	3	0	O=c1[nH]c(=O)c2c([nH]1)nc[nH]2	1	C249H102N63O72S2Zn+5	valid	Zn
2v5x	general	Protein-Ligand	2.25	Kd=220nM	Kd	6.66	2007	HISTONE DEACETYLASE 8	V5X	Q9BY41	C36H41N5O5	623.741	623.311	87	91	148.34	5.13	6.65	6	4	19	ONC(=O)CCCCC[C@H](C(=O)NCCc1c([nH]c2c1cccc2)c1ccccc1)NC(=O)Cc1c(C)[nH]c2c1cc(OC)cc2	1	C297H92N80O87S4Zn+4	train	Zn
2v77	refined	Protein-Ligand	1.6	Ki=8.7uM	Ki	5.06	2008	human carboxypeptidase A1 (hCPA1)	PAY	P15085	C12H18O8	290.267	290.1	38	37	149.2	4.97	0.75	0	8	6	OC(=O)CC[C@@H](C(=O)O)C[C@H](C(=O)O)C[C@@H](C(=O)O)C	1	C280H91N74O87S2Zn+4	test	Zn
2v7a	refined	Protein-Ligand	2.5	Kd=0.005uM	Kd	8.3	2007	T315I Abl Mutant	627	P00519	C26H31N6O3	475.563	475.246	66	70	95	1.8	2.87	3	3	8	CO[C@@H](C(=O)N1Cc2c(C1)[nH]nc2NC(=O)c1ccc(cc1)N1CC[N@H+](CC1)C)c1ccccc1	1	C264H82MgN69O79S2+6	train	Mg
2vc7	general	Protein-Ligand	2.05	Ki=432.7uM	Ki	3.36	2008	SsoPox	HT5	Q97VT7	C14H25NO2S	271.419	271.161	43	43	71.47	4.24	3.67	1	2	10	CCCCCCCCCC(=O)N[C@H]1CCSC1=O	1	C319H114CoFeN89O91S2+11	train	Fe
2vcg	general	Protein-Ligand	1.9	IC50=1.69uM	IC50	5.77	2008	Histone Deacetylase-Like Amidohydrolase	S17	Q70I53	C18H25BrN2O5	429.306	428.095	51	51	104.73	2.63	3.28	3	4	15	COC(=O)[C@H](Cc1ccc(cc1)Br)NC(=O)CCCCCCC(=O)NO	1	C331H118N91O99S6Zn+2	train	Zn
2vd7	general	Protein-Ligand	2.25	IC50=4.2uM	IC50	5.38	2007	human JMJD2A catalytic domain	PD2	O75164	C7H5NO4	167.119	167.022	17	17	87.49	2.11	0.48	0	5	0	OC(=O)c1ccnc(c1)C(=O)O	1	C272H96N65NiO79S2+4	valid	XX
2ves	refined	Protein-Ligand	1.9	Ki=20nM	Ki	7.7	2008	paLpxC	GVR	P47205	C23H20N2O4S	420.481	420.114	50	53	103.88	4.23	5.25	3	4	8	ONC(=O)[C@H](NS(=O)(=O)c1ccc2c(c1)cccc2)Cc1ccc2c(c1)cccc2	1	C329H128N90O99S3Zn+10	train	Zn
2vf6	general	Protein-Ligand	2.1	IC50=3nM	IC50	8.52	2007	human FARNESYL PYROPHOSPHATE SYNTHETASE	M0N	P14324	C9H14N2O7P2	324.164	324.028	34	35	186.09	-2.53	-1	1	8	3	OP(C(P(O)(O)O)(Cc1cnc2n1cccc2)O)(O)O	1	C340H131Mg3N87O108S2+7	train	Mg
2vfz	general	Protein-Ligand	2.4	Ki=245uM	Ki	3.61	2007	N-ACETYLLACTOSAMINIDE ALPHA-1,3-GALACTOSYL TRANSFERASE	UPF	P14769	C15H25FN2O16P2	570.309	570.066	61	63	310.26	-5.77	-4.69	6	11	14	OC[C@H]1O[C@H](OP(OP(OC[C@H]2O[C@H]([C@@H]([C@@H]2O)O)n2ccc(=O)[nH]c2=O)(O)O)(O)O)[C@@H]([C@H]([C@H]1O)O)F	1	C372H110MnN95O93S8+7	train	Mn
2vh0	refined	Protein-Ligand	1.7	Ki=3.1nM	Ki	8.51	2008	fXa	GSI	P00742	C22H24ClFN5O3S2	525.039	524.099	58	61	125.36	2.96	3.6	2	4	8	C[NH+](Cc1nccn1c1ccc(c(c1)F)N1CC[C@@H](C1=O)NS(=O)(=O)/C=C/c1ccc(s1)Cl)C	1	C296H109MgN76O91S5+6	train	Mg
2vhq	general	Protein-Ligand	2.15	Kd=140uM	Kd	3.85	2007	Ntpase P4(S252A)	ATP	Q94M05	C10H19N5O13P3	510.205	510.019	50	52	329.38	-6.07	-2.36	3	12	9	O[C@@H]1[C@@H](COP(OP(OP(O)(O)O)(O)O)(O)O)O[C@H]([C@@H]1O)n1cnc2c1ncnc2N	1	C306H108MgN91O101+9	train	Mg
2vj8	refined	Protein-Ligand	1.8	Ki=2nM	Ki	8.7	2008	human leukotriene a4 hydrolase	HA2	P09960	C22H29N2O5	401.476	401.208	58	59	114.71	1.09	2.28	2	4	13	OC(=O)CCCCC(=O)N(C[C@H](Cc1ccc(cc1)OCc1ccccc1)[NH3+])O	1	C444H146N110O125S4Zn+7	test	Zn
2vl1	general	Protein-Ligand	2.15	Ki=45mM	Ki	1.35	2008	BETA-ALANINE SYNTHASE	2-mer	Q96W94	C4H9N2O3	133.126	133.061	18	17	94.04	-3.17	-2.18	2	3	3	OC(=O)CNC(=O)C[NH3+]	1	C260H113N79O92S3Zn2+6	test	Zn
2vl8	general	Protein-Ligand	2.31	IC50=30uM	IC50	4.52	2008	glucosyltransferase domain of C. sordellii lethal toxin	UDP	Q46342	C9H16N2O12P2	406.177	406.018	41	42	251.34	-5.29	-3.49	3	9	7	O[C@@H]1[C@@H](COP(OP(O)(O)O)(O)O)O[C@H]([C@@H]1O)n1ccc(=O)[nH]c1=O	1	C303H113CaN77O83S+3	train	Ca
2vnf	general	Protein-Ligand	1.76	Kd=3uM	Kd	5.52	2008	ING4	10-mer	Q9UNL4 P68431	C13H28N6O5	348.399	348.212	52	51	209.38	-3.22	-3.63	5	5	14	O=C([C@@H](NC(=O)[C@@H]([NH3+])C)CCC[NH+]=C(N)N)N[C@H](C(=O)O)[C@H](O)C	1	C146H43N37O36S4Zn+3	train	Zn
2vnp	refined	Protein-Ligand	2.19	Ki=0.12nM	Ki	9.92	2008	IDI-1	DED	Q46822	C4H16NO7P2	252.12	252.04	30	29	151.23	-5.13	-2.52	1	5	5	OP(OP(O)(O)O)(OCC[NH+](C)C)O	1	C293H108MgMnN82O84S3+10	valid	MgMn
2vqj	general	Protein-Ligand	2.1	IC50=367nM	IC50	6.44	2008	Histone deacetylases (HDACs)	TFG	P56524	C19H16F3N3O3S	423.409	423.086	45	48	106.83	1.92	2.91	2	4	6	O=C(c1ccc(s1)C(C(F)(F)F)(O)O)N1CCn2c(C1)ncc2c1ccccc1	1	C218H77N64O61S2Zn+5	train	Zn
2vqm	general	Protein-Ligand	1.8	IC50=978nM	IC50	6.01	2008	Histone deacetylases (HDACs)	HA3	P56524	C18H16N4O3S	368.41	368.094	42	45	115.7	1.51	2.72	2	4	6	ONC(=O)c1ccc(s1)C(=O)N1CCn2c(C1)ncc2c1ccccc1	1	C189H63N55O53S2Zn+3	test	Zn
2vx1	general	Protein-Ligand	1.65	IC50=0.220uM	IC50	6.66	2008	Ephrin Type-B Receptor 4	7X8	P54760	C18H14ClN5O3	383.788	383.079	41	44	111.39	3.27	4.29	3	3	5	Clc1ccc2c(c1Nc1ccnc(n1)Nc1cccc(c1)C(=O)N)OCO2	1	C319H103Mg2N85O86S2+9	train	Mg
2vxj	general	Protein-Ligand	1.9	Kd=68uM	Kd	4.17	2008	PA-I GALACTOPHILIC LECTIN	3-mer	Q05097	C18H32O16	504.437	504.169	66	68	268.68	-6.33	-7.57	11	11	18	OC[C@H]1O[C@@H](O[C@@H]2[C@@H](CO)O[C@H]([C@@H]([C@H]2O)O)O)[C@@H]([C@H]([C@H]1O)O[C@H]1O[C@H](CO)[C@@H]([C@@H]([C@H]1O)O)O)O	1	C170H51CaN48O56S+4	test	Ca
2vzr	refined	Protein-Ligand	1.95	Kd=52.6uM	Kd	4.28	2009	Exo-Beta-D-Glucosaminidase	GCU	Q56F26	C6H10O7	194.139	194.043	23	23	127.45	-1.46	-3.13	4	6	4	O[C@H]1O[C@H](C(=O)O)[C@H]([C@@H]([C@H]1O)O)O	1	C133H47CaN40O41+2	train	Ca
2w08	refined	Protein-Ligand	1.7	Kd=380uM	Kd	3.42	2009	human Serum amyloid P-component	TPO	P02743	C4H12NO6P	201.115	201.04	24	23	148.45	-3.99	-2.26	1	5	2	OC(=O)[C@H]([C@H](OP(O)(O)O)C)[NH3+]	1	C153H65Ca2N46O52+6	valid	Ca
2w0d	general	Protein-Ligand	2	IC50=2.0nM	IC50	8.7	2009	Macrophage metalloelastase	CGS	P39900	C18H23N3O5S	393.457	393.136	50	51	117.21	1.69	3.28	2	5	10	ONC(=O)[C@H](N(S(=O)(=O)c1ccc(cc1)OC)Cc1cccnc1)C(C)C	1	C234H75CaN58O57SZn+6	test	ZnCa
2w0s	general	Protein-Ligand	2.92	Kd=0.5mM	Kd	3.3	2008	Vacc-TMPK	BVP	P68693	C11H17BrN2O8P	416.139	414.991	40	41	167.83	-2.11	-1.21	2	6	6	BrCCc1cn([C@H]2C[C@@H]([C@H](O2)COP(O)(O)O)O)c(=O)[nH]c1=O	1	C304H107Mg2N77O96S+5	train	Mg
2w0x	general	Protein-Ligand	2.12	IC50=625uM	IC50	3.2	2009	HYPOXIA-INDUCIBLE FACTOR 1 ALPHA INHIBITOR	PD2	Q9NWT6	C7H5NO4	167.119	167.022	17	17	87.49	2.11	0.48	0	5	0	OC(=O)c1ccnc(c1)C(=O)O	1	C292H90FeN73O71S+6	train	Fe
2w12	general	Protein-Ligand	1.46	IC50=22.2uM	IC50	4.65	2009	Zinc metalloproteinase BaP1	WR2	P83512	C20H33N5O5S	455.572	455.22	64	64	177.76	1.43	2.5	5	6	16	ONC(=O)[C@H]([C@H](C(=O)N[C@@H](C(C)(C)C)C(=O)NC)CC(C)C)CNC(=O)c1nccs1	1	C241H79N71O71S3Zn+8	train	Zn
2w26	refined	Protein-Ligand	2.08	Ki=0.4nM	Ki	9.4	2008	human coagulation enzyme Factor Xa (FXa)	RIV	P00742	C19H18ClN3O5S	435.881	435.066	47	50	116.42	2.49	3.04	1	3	6	O=C1O[C@H](CN1c1ccc(cc1)N1CCOCC1=O)CNC(=O)c1ccc(s1)Cl	1	C285H103CaN75O88S4+7	train	Ca
2w2i	general	Protein-Ligand	2.1	Ki=914nM	Ki	6.04	2009	HUMAN 2-OXOGLUTARATE OXYGENASE LOC390245	PD2	B2RXH2	C7H5NO4	167.119	167.022	17	17	87.49	2.11	0.48	0	5	0	OC(=O)c1ccnc(c1)C(=O)O	1	C281H97N67NiO77S2+3	train	XX
2w47	refined	Protein-Ligand	1.4	Kd=10.5uM	Kd	4.98	2009	Exo-Beta-D-Glucosaminidase	UNF	A3DK57	C12H16O12	352.248	352.064	40	41	203.44	-1.85	-4.06	5	9	7	O[C@H]1C=C(O[C@@H]([C@@H]1O)O[C@H]1[C@H](O[C@@H]([C@@H]([C@H]1O)O)O)C(=O)O)C(=O)O	1	C148H51CaN42O47+2	train	Ca
2w7x	general	Protein-Ligand	2.07	IC50=24nM	IC50	7.62	2009	SERINE/THREONINE-PROTEIN KINASE CHK2	D1A	O96017	C18H18N7O3	380.381	380.147	46	48	169.08	3.93	2.4	2	3	5	O=C(c1cc2c([nH]1)c(ccc2)N(=O)=O)Nc1ccc(cc1)/C(=N/[NH+]=C(N)N)/C	1	C340H108MgN81O99S+10	valid	Mg
2w87	general	Protein-Ligand	1.6	Kd=22.2uM	Kd	4.65	2009	Esterase D	GCU	Q51815	C6H10O7	194.139	194.043	23	23	127.45	-1.46	-3.13	4	6	4	O[C@H]1O[C@H](C(=O)O)[C@H]([C@@H]([C@H]1O)O)O	1	C131H51CaN42O43+2	test	Ca
2wa3	general	Protein-Ligand	2.5	IC50=1mM	IC50	3	2010	HYPOXIA-INDUCIBLE FACTOR 1 ALPHA INHIBITOR	A29	Q9NWT6	C8H6O4	166.131	166.027	18	18	74.6	1.86	0.66	1	4	2	Oc1cccc(c1)C(=O)C(=O)O	1	C271H94FeN65O63S2+6	train	Fe
2wa4	general	Protein-Ligand	2.5	IC50=18uM	IC50	4.74	2010	HYPOXIA-INDUCIBLE FACTOR 1 ALPHA INHIBITOR	069	Q9NWT6	C7H7NO3	153.135	153.043	18	18	69.56	0.35	0.9	3	3	4	ONC(=O)c1cccc(c1)O	1	C274H93FeN66O64S2+6	test	Fe
2wd3	general	Protein-Ligand	1.8	IC50=86nM	IC50	7.07	2010	CARBONIC ANHYDRASE 2	MS4	P00918	C16H12ClN5O3S	389.816	389.035	38	40	132.27	2.44	3.88	1	5	5	N#Cc1ccc(cc1c1ccc(c(c1)Cl)OS(=O)(=O)N)Cn1ncnc1	1	C338H107N88O78SZn+6	train	Zn
2weg	refined	Protein-Ligand	1.1	Kd=314nM	Kd	6.5	2009	Carbonic Anhydrase 2	FBV	P00918	C6H6FNO2S	175.181	175.01	17	17	68.54	0.59	2.25	1	2	1	Fc1ccccc1S(=O)(=O)N	1	C277H89N71O60S2Zn+4	train	Zn
2weh	refined	Protein-Ligand	2.1	Kd=1125nM	Kd	5.95	2009	Carbonic Anhydrase 2	FB1	P00918	C6H6ClNO2S	191.635	190.981	17	17	68.54	1.11	2.77	1	2	1	Clc1ccccc1S(=O)(=O)N	1	C283H90N73O63SZn+4	train	Zn
2wej	refined	Protein-Ligand	1.45	Kd=839nM	Kd	6.08	2009	Carbonic Anhydrase 2	FB2	P00918	C6H7NO2S	157.19	157.02	17	17	68.54	0.49	2.12	1	2	1	NS(=O)(=O)c1ccccc1	1	C264H84N69O57SZn+4	train	Zn
2weo	refined	Protein-Ligand	1.4	Kd=118nM	Kd	6.93	2009	Carbonic Anhydrase 2	FBW	P00918	C6H6FNO2S	175.181	175.01	17	17	68.54	0.59	2.25	1	2	1	Fc1cccc(c1)S(=O)(=O)N	1	C282H93N72O63S2Zn+4	train	Zn
2wey	general	Protein-Ligand	2.8	IC50=76nM	IC50	7.12	2009	Human PDE10A	EV1	Q9Y233	C20H21NO4	339.385	339.147	46	48	49.81	3.94	3.86	0	1	6	COc1ccc(cc1OC)Cc1nccc2c1cc(OC)c(c2)OC	1	C360H117MgN89O100S6Zn+4	test	ZnMg
2wf5	refined	Protein-Ligand	1.3	Kd=1uM	Kd	6	2009	BETA-PHOSPHOGLUCOMUTASE	BG6	P71447	C6H14O9P	261.144	261.038	30	30	173.66	-4.4	-3.54	4	7	6	O[C@@H]1O[C@H](COP(O)(O)O)[C@H]([C@@H]([C@H]1O)O)O	1	C267H97MgN69O82+7	train	Mg
2wic	general	Protein-Ligand	2.05	Kd=4.1uM	Kd	5.39	2010	intracellular domain of FeoB (NFeoB) from Klebsiella pneumoniae (KpNFeoB)	GNP	A6TF32	C10H21N6O13P3	526.227	526.038	53	55	353.4	-5.89	-3.69	3	11	9	O[C@@H]1[C@@H](COP(OP(NP(O)(O)O)(O)O)(O)O)O[C@H]([C@@H]1O)n1cnc2c1[nH]c(N)[nH+]c2=O	1	C206H69MgN58O66S+7	test	Mg
2wji	general	Protein-Ligand	1.9	Kd=9.6uM	Kd	5.02	2009	Ferrous iron transport protein B homolog	GNP	Q57986	C10H21N6O13P3	526.227	526.038	53	55	353.4	-5.89	-3.69	3	11	9	O[C@@H]1[C@@H](COP(OP(NP(O)(O)O)(O)O)(O)O)O[C@H]([C@@H]1O)n1cnc2c1[nH]c(N)[nH+]c2=O	1	C210H74MgN56O64S2+7	train	Mg
2wo8	general	Protein-Ligand	2	IC50=0.52uM	IC50	6.28	2009	Macrophage metalloproteinases	077	P39900	C17H18O3	270.323	270.126	38	39	57.53	4.49	3.12	1	3	6	O[C@H](CC(=O)O)CCc1ccc(cc1)c1ccccc1	1	C272H85N69O74SZn+7	train	Zn
2wo9	general	Protein-Ligand	1.7	IC50=62nM	IC50	7.21	2009	Macrophage metalloproteinases	068	P39900	C19H20O4	312.36	312.136	43	44	74.6	4.17	3.32	1	4	7	OC(=O)C[C@H](CCc1ccc(cc1)c1ccc(cc1)C(=O)C)O	1	C281H92CaN69O72SZn+7	train	ZnCa
2woa	general	Protein-Ligand	2.26	IC50=1.15uM	IC50	5.94	2009	Macrophage metalloproteinases	576	P39900	C18H18O3	282.334	282.126	39	41	57.53	4.49	3.03	1	3	5	OC(=O)C[C@H](CCc1ccc2c(c1)Cc1c2cccc1)O	1	C274H89CaN68O70SZn+7	valid	ZnCa
2woq	general	Protein-Ligand	1.75	Ki=1.33mM	Ki	2.88	2009	P. aeruginosa porphobilinogen synthase	AYC	Q59643	C8H15NO3	173.21	173.105	27	26	66.4	1.63	1.16	1	3	5	OC(=O)CCC[C@H](NC(=O)C)C	1	C338H108MgN77O98S3+4	train	Mg
2wqp	general	Protein-Ligand	1.75	Ki=3.1uM	Ki	5.51	2009	Neisseria meningitidis sialic acid synthase (NeuB)	WQP	Q7DDU0	C11H23NO12P	392.274	392.096	48	47	251.06	-4.62	-4.17	6	11	15	OC[C@H]([C@H]([C@@H]([C@@H]([C@H](C[C@H](C(=O)O)OP(O)(O)O)O)NC(=O)C)O)O)O	1	C370H137MnN101O109S5Se2+9	train	Mn
2wva	general	Protein-Ligand	2.2	Kd=20pM	Kd	10.7	2010	Pyruvate decarboxylase from Zymomonas mobilis (ZmPDC)	TPU	P06672	C11H20N6O7P2	410.26	410.087	46	47	229.3	-2.81	-0.21	1	9	7	Cc1ncc(c(n1)N)Cn1nnc(c1C)CCOP(OP(O)(O)O)(O)O	1	C462H149MgN113O135S7+4	train	Mg
2wvz	refined	Protein-Ligand	2.4	Ki=96uM	Ki	4.02	2009	FAMILY GH92 INVERTING MANNOSIDASE BT3990	KIF	Q8A0N1	C8H12N2O6	232.191	232.07	28	29	130.33	-2.78	-4.01	5	6	5	OC[C@@H]1[C@@H](O)[C@H](O)[C@@H]([C@@H]2N1C(=O)C(=O)N2)O	1	C233H89CaN63O72S2+3	valid	Ca
2ww0	general	Protein-Ligand	2.8	Ki=5uM	Ki	5.3	2009	FAMILY GH92 INVERTING MANNOSIDASE BT3990	SWA	Q8A0N1	C8H16NO3	174.218	174.113	28	29	65.13	-1.26	-1.3	4	3	3	O[C@@H]1C[N@H+]2[C@@H]([C@@H]1O)[C@H](O)CCC2	1	C234H92CaN62O71S2+3	test	Ca
2wwj	general	Protein-Ligand	2.6	IC50=33uM	IC50	4.48	2010	human LYSINE-SPECIFIC DEMETHYLASE 4A, JMJD2A	Y28	O75164	C18H17NO6	343.331	343.106	42	43	112.93	4.08	1.85	1	5	7	OC(=O)[C@H](NC(=O)C(=O)O)Cc1ccc(cc1)OCc1ccccc1	1	C357H117N89NiO101S3+7	valid	XX
2wyf	refined	Protein-Ligand	2.4	Kd=37uM	Kd	4.43	2010	PA-I GALACTOPHILIC LECTIN	GLA-MBG	Q05097	C13H24O11	356.323	356.132	48	49	178.53	-3.65	-4.74	7	7	12	CO[C@@H]1O[C@H](CO)[C@@H]([C@@H]([C@H]1O[C@H]1O[C@H](CO)[C@@H]([C@@H]([C@H]1O)O)O)O)O	1	C143H45CaN37O46S+	train	Ca
2wyi	general	Protein-Ligand	2.6	Ki=18uM	Ki	4.74	2010	ALPHA-MANNOSIDASE	SWA	Q99YP5	C8H16NO3	174.218	174.113	28	29	65.13	-1.26	-1.3	3	3	3	O[C@@H]1C[N@H+]2[C@@H]([C@@H]1O)[C@H](O)CCC2	1	C262H94N69O74S4Zn+6	valid	Zn
2wzf	refined	Protein-Ligand	2.1	Kd=100nM	Kd	7	2009	GLUCOSYLTRANSFERASE	UDP-BGC	Q5ZVS2	C9H16N2O12P2	406.177	406.018	41	42	251.34	-5.29	-3.49	3	9	7	O[C@@H]1[C@@H](COP(OP(O)(O)O)(O)O)O[C@H]([C@@H]1O)n1ccc(=O)[nH]c1=O	1	C350H119MnN85O97S2+5	test	Mn
2wzs	refined	Protein-Ligand	2.25	Ki=140uM	Ki	3.85	2009	FAMILY GH92 INVERTING MANNOSIDASE BT3990	MVL	Q8A0N1	C8H12N2O4	200.192	200.08	26	27	98.74	-2.43	-1.81	4	5	5	OC[C@@H]1[C@@H](O)[C@H](O)[C@@H](c2n1ccn2)O	1	C244H92CaN67O76S2+3	train	Ca
2x2r	refined	Protein-Ligand	2.2	Ki=76.2nM	Ki	7.12	2011	KINESIN-LIKE PROTEIN KIF11	X2O	P52732	C20H26NO2S	344.491	344.168	50	51	90.24	2.87	3.4	1	2	7	CC[C@H](C(c1ccccc1)(c1ccccc1)SC[C@@H](C(=O)O)[NH3+])C	1	C278H92MgN70O83S+6	train	Mg
2x7s	general	Protein-Ligand	1.64	Ki=1660nM	Ki	5.78	2010	HUMAN CARBONIC ANHYDRASE II	WZC	P00918	C19H27NO5S	381.486	381.161	53	56	107.23	3.31	4.63	2	3	4	COc1cc2c(cc1O)CC[C@@H]1[C@@H]2CC[C@]2([C@H]1CC[C@@H]2OS(=O)(=O)N)C	1	C334H99N90O76SZn2+9	test	Zn
2x7t	refined	Protein-Ligand	1.89	Ki=232nM	Ki	6.63	2010	HUMAN CARBONIC ANHYDRASE II	WZB	P00918	C20H30N2O6S2	458.592	458.155	60	63	155.54	3.36	5.84	2	4	5	CCc1cc2c(cc1OS(=O)(=O)N)CC[C@@H]1[C@@H]2CC[C@]2([C@H]1CC[C@@H]2OS(=O)(=O)N)C	1	C341H107N90O77SZn2+9	train	Zn
2x7u	refined	Protein-Ligand	2.12	Ki=5340nM	Ki	5.27	2010	HUMAN CARBONIC ANHYDRASE II	WZA	P00918	C19H27NO5S	381.486	381.161	53	56	107.23	3.1	4.28	2	3	4	COc1cc2[C@H]3CC[C@]4([C@H]([C@@H]3CCc2cc1OS(=O)(=O)N)CC[C@@H]4O)C	1	C317H96N79O67S2Zn2+7	valid	Zn
2x8z	refined	Protein-Ligand	1.98	Ki=11nM	Ki	7.96	2010	ANGIOTENSIN CONVERTING ENZYME	X8Z	Q10714	C9H15NO3S	217.285	217.077	29	29	96.41	1.52	0.57	0	3	4	SC[C@H](C(=O)N1CCC[C@H]1C(=O)O)C	1	C283H108N79O76S3Zn+9	train	Zn
2x91	refined	Protein-Ligand	1.98	Ki=180nM	Ki	6.74	2010	ANGIOTENSIN CONVERTING ENZYME	LPR	Q10714	C21H33N3O5	407.504	407.242	62	63	139.16	-1.24	-0.57	2	5	11	[NH3+]CCCC[C@@H](C(=O)N1CCC[C@H]1C(=O)O)[NH2+][C@H](C(=O)O)CCc1ccccc1	1	C385H137N99O112S4Zn+9	test	Zn
2x95	refined	Protein-Ligand	1.96	Ki=11.3uM	Ki	4.95	2010	ANGIOTENSIN CONVERTING ENZYME	X95	Q10714	C27H36N4O5	496.599	496.269	72	74	163.74	0.17	1.1	4	5	14	[NH3+]CCCC[C@@H](C(=O)N[C@@H](C(=O)O)Cc1c[nH]c2c1cccc2)[NH2+][C@H](C(=O)O)CCc1ccccc1	1	C425H155N110O126S3Zn+11	test	Zn
2x96	refined	Protein-Ligand	1.85	Ki=94uM	Ki	4.03	2010	ANGIOTENSIN CONVERTING ENZYME	RX3	Q10714	C33H37N3O7P	618.637	618.237	81	85	174.57	4.93	5.56	3	6	14	O=C(N[C@@H](P([C@@H]1CCC[C@H]1C(=O)N[C@H](C(=O)O)Cc1c[nH]c2c1cccc2)(O)O)Cc1ccccc1)OCc1ccccc1	1	C472H166N125O139S2Zn+12	valid	Zn
2x97	refined	Protein-Ligand	1.85	Ki=2200nM	Ki	5.66	2010	ANGIOTENSIN CONVERTING ENZYME	RX4	Q10714	C21H32N4O8P	499.475	499.196	66	66	221.74	-0.27	0.98	4	8	15	OC(=O)C[C@@H](C(=O)N[C@H](P(C[C@H](C(=O)N[C@H](C(=O)N)C)C)(O)O)Cc1ccccc1)NC(=O)C	1	C415H145N108O116S2Zn+10	train	Zn
2xbp	refined	Protein-Ligand	1.2	Kd=9.6uM	Kd	5.02	2010	signal transduction protein P(II) I86N variant from Synechococcus elongatus	ATP	P0A3F4	C10H19N5O13P3	510.205	510.019	50	52	329.38	-6.07	-2.36	3	12	9	O[C@@H]1[C@@H](COP(OP(OP(O)(O)O)(O)O)(O)O)O[C@H]([C@@H]1O)n1cnc2c1ncnc2N	1	C351H114MgN102O102S2+13	valid	Mg
2xef	refined	Protein-Ligand	1.59	Ki=0.145nM	Ki	9.84	2010	Human glutamate carboxypeptidase II (GCPII)	AR8	Q04609	C37H58N8O19	918.899	918.382	122	123	361.25	2.7	2.98	3	13	38	O=C(N[C@H](C(=O)O)CCC(=O)O)N[C@H](C(=O)O)CCCCn1nnc(c1)COCCOCCOCCOCCOCCOCCOCCOCCNc1ccc(cc1N(=O)=O)N(=O)=O	1	C488H169N139O155Zn2+16	train	Zn
2xeg	refined	Protein-Ligand	1.59	Ki=0.020nM	Ki	10.7	2010	Human glutamate carboxypeptidase II (GCPII)	CI9	Q04609	C29H42N8O15	742.688	742.277	94	95	324.33	3.29	2.91	3	13	26	O=C(N[C@H](C(=O)O)CCC(=O)O)N[C@H](C(=O)O)CCCCn1nnc(c1)COCCOCCOCCOCCNc1ccc(cc1N(=O)=O)N(=O)=O	1	C466H145N131O139Zn2+17	train	Zn
2xei	refined	Protein-Ligand	1.69	Ki=0.024nM	Ki	10.62	2010	Human glutamate carboxypeptidase II (GCPII)	ARK	Q04609	C25H34N8O13	654.583	654.225	80	81	305.87	3.59	2.88	3	13	20	O=C(N[C@H](C(=O)O)CCC(=O)O)N[C@H](C(=O)O)CCCCn1nnc(c1)COCCOCCNc1ccc(cc1N(=O)=O)N(=O)=O	1	C499H161N139O152SZn2+14	train	Zn
2xej	refined	Protein-Ligand	1.78	Ki=1.34nM	Ki	8.87	2010	Human glutamate carboxypeptidase II (GCPII)	OKD	Q04609	C24H41N5O12	591.609	591.275	82	82	229.89	1.26	0.51	2	9	25	COCCOCCOCCOCCOCc1nnn(c1)CCCC[C@@H](C(=O)O)NC(=O)N[C@H](C(=O)O)CCC(=O)O	1	C498H164N140O151Zn2+15	valid	Zn
2xhm	refined	Protein-Ligand	1.96	Ki=0.16uM	Ki	6.8	2010	Angiotensin-I converting enzyme homologue AnCE from Drosophila melanogaster	K26	Q10714	C25H35N3O8P	536.534	536.216	72	73	202.04	1.37	2.27	5	8	16	CC[C@@H]([C@@H](C(=O)N[C@H](C(=O)N[C@H](P(O)(O)O)Cc1ccc(cc1)O)Cc1ccc(cc1)O)NC(=O)C)C	1	C388H139N97O107SZn+9	valid	Zn
2xi7	general	Protein-Ligand	2.2	Kd=7.20uM	Kd	5.14	2010	N-terminal endonuclease domain of Bunyaviridae RNA Polymerases	XI7	A5HC98	C10H8O4	192.168	192.042	22	22	74.6	2.66	1.4	1	4	3	O=C(c1ccccc1)/C=C(/C(=O)O)\O	1	C169H62Mn2N43O56S+5	train	Mn
2xml	general	Protein-Ligand	2.55	IC50=500uM	IC50	3.3	2010	human JMJD2C catalytic domain (KDM4C)	OGA	Q9H3R0	C4H5NO5	147.086	147.017	15	14	103.7	0.63	-1.34	1	5	2	OC(=O)CNC(=O)C(=O)O	1	C228H89N56NiO68S2+4	valid	XX
2xtn	general	Protein-Ligand	1.9	Kd=40nM	Kd	7.4	2010	Human GTPASE IMAP FAMILY MEMBER 2 (1-234)	GTP	Q9UG22	C10H20N5O14P3	527.212	527.022	52	54	350.6	-5.61	-3.65	2	11	9	O[C@@H]1[C@@H](COP(OP(OP(O)(O)O)(O)O)(O)O)O[C@H]([C@@H]1O)n1cnc2c1[nH]c(N)[nH+]c2=O	1	C256H88MgN78O85S3+9	train	Mg
2xto	general	Protein-Ligand	2.8	Kd=630nM	Kd	6.2	2010	Human GTPASE IMAP FAMILY MEMBER 2 (21-260)	GDP	Q9UG22	C10H18N5O11P2	446.224	446.048	46	48	287.32	-4.43	-3.33	2	9	7	O[C@@H]1[C@@H](COP(OP(O)(O)O)(O)O)O[C@H]([C@@H]1O)n1cnc2c1[nH]c(N)[nH+]c2=O	1	C191H72MgN60O69+6	train	Mg
2xvd	general	Protein-Ligand	1.7	IC50=0.002uM	IC50	8.7	2011	EPHRIN TYPE-B RECEPTOR 4	AS6	P54760	C26H33N5O4S	511.636	511.225	69	72	116.27	3.36	5.03	2	5	9	OCc1ccc(c(c1)N(c1ccnc(n1)Nc1cc(cc(c1)S(=O)(=O)C)N1CCOCC1)C(C)C)C	1	C308H100Mg2N82O89S5+6	train	Mg
2xy9	general	Protein-Ligand	1.97	Ki=0.65nM	Ki	9.19	2011	ANGIOTENSIN-CONVERTING ENZYME	3ES	P12821	C38H39N3O9P	712.705	712.242	90	94	205.04	5.64	6.13	3	8	19	O=C(N[C@H](P(C[C@@H](C(=O)N[C@H](C(=O)O)Cc1ccc(cc1)O)Cc1onc(c1)c1ccccc1)(O)O)Cc1ccccc1)OCc1ccccc1	1	C571H177N142O154S6Zn+9	test	Zn
2xyd	refined	Protein-Ligand	2.15	Ki=150nM	Ki	6.82	2011	ANGIOTENSIN-CONVERTING ENZYME	3ES	P12821	C38H39N3O9P	712.705	712.242	90	94	205.04	5.64	6.13	3	8	19	O=C(N[C@H](P(C[C@@H](C(=O)N[C@H](C(=O)O)Cc1ccc(cc1)O)Cc1onc(c1)c1ccccc1)(O)O)Cc1ccccc1)OCc1ccccc1	1	C528H183N134O147S8Zn+13	valid	Zn
2xzw	general	Protein-Ligand	1.95	Kd=5.1uM	Kd	5.29	2010	NITROGEN REGULATORY PROTEIN P-II	AKG	P0A3F4	C5H6O5	146.098	146.022	16	15	91.67	1.43	-0.5	0	5	2	OC(=O)CCC(=O)C(=O)O	1	C230H71MgN71O60S+9	train	Mg
2y0j	general	Protein-Ligand	2.43	IC50=12nM	IC50	7.92	2011	CAMP AND CAMP-INHIBITED CGMP 3', 5'-CYCLIC PHOSPHODIESTERASE 10A	AXC	Q9Y233	C18H14N6S	346.409	346.1	39	43	97.06	3.77	3.75	1	4	3	Cc1nn2c(n1)c1ccccc1nc2SCc1nc2c([nH]1)cccc2	1	C309H109MgN76O87S3Zn+5	train	ZnMg
2y1d	general	Protein-Ligand	2.05	IC50=0.15uM	IC50	6.82	2011	1-DEOXY-D-XYLULOSE 5-PHOSPHATE REDUCTOISOMERASE	34F	P9WNS1	C10H13Cl2NO5P	329.094	327.991	32	32	114.82	0.4	2.65	1	5	6	O=CN(CC[C@H](P(O)(O)O)c1ccc(c(c1)Cl)Cl)O	1	C243H81MnN69O79S+5	train	Mn
2y1g	general	Protein-Ligand	1.95	IC50=0.7uM	IC50	6.15	2011	1-DEOXY-D-XYLULOSE 5-PHOSPHATE REDUCTOISOMERASE	FM5	P9WNS1	C11H15Cl2NO5P	343.12	342.006	35	35	114.82	0.39	2.4	1	5	6	CC(=O)N(CC[C@H](P(O)(O)O)c1ccc(c(c1)Cl)Cl)O	1	C268H95MnN75O88S3+5	test	Mn
2y34	general	Protein-Ligand	2.01	Kd=80nM	Kd	7.1	2010	Catalytic Domain of Human PHD2	UN9	Q9GZT9	C12H9ClN2O4	280.664	280.025	28	29	99.52	3.35	1.8	2	5	4	OC(=O)CNC(=O)c1nc(Cl)c2c(c1O)cccc2	1	C287H96FeN75O74S2+8	test	Fe
2y4k	general	Protein-Ligand	2.45	Kd=3.5uM	Kd	5.46	2011	Mannosylglycerate synthase (MGS)	GDP	D0MI02	C10H18N5O11P2	446.224	446.048	46	48	287.32	-4.43	-3.33	2	9	7	O[C@@H]1[C@@H](COP(OP(O)(O)O)(O)O)O[C@H]([C@@H]1O)n1cnc2c1[nH]c(N)[nH+]c2=O	1	C297H111MgN80O86S2+9	train	Mg
2y4l	general	Protein-Ligand	2.8	Kd=0.5uM	Kd	6.3	2011	Mannosylglycerate synthase (MGS)	GDP	D0MI02	C10H18N5O11P2	446.224	446.048	46	48	287.32	-4.43	-3.33	2	9	7	O[C@@H]1[C@@H](COP(OP(O)(O)O)(O)O)O[C@H]([C@@H]1O)n1cnc2c1[nH]c(N)[nH+]c2=O	1	C326H117MnN86O93S3+8	train	Mn
2y4m	general	Protein-Ligand	2.7	Kd=0.345uM	Kd	6.46	2011	Mannosylglycerate synthase (MGS)	GDX	D0MI02	C16H28N5O16P2	608.365	608.101	67	70	368.12	-7.23	-4.71	8	12	15	OC[C@H]1O[C@H](OP(OP(OC[C@H]2O[C@H]([C@@H]([C@@H]2O)O)n2cnc3c2[nH]c(N)[nH]c3=O)(O)O)(O)O)[C@H]([C@H]([C@@H]1O)O)O	1	C353H121MgN95O104S4+9	train	Mg
2y6c	general	Protein-Ligand	1.7	IC50=10uM	IC50	5	2011	MATRILYSIN	TQI	P09237	C18H14ClF3N2O4S	446.828	446.031	43	45	107.64	5	5.29	2	4	5	OC(=O)[C@@H](NS(=O)(=O)c1ccc(c(c1)C(F)(F)F)Cl)Cc1c[nH]c2c1cccc2	1	C256H84CaN63O70SZn2+5	test	ZnCa
2y6d	general	Protein-Ligand	1.6	IC50=79nM	IC50	7.1	2011	MATRILYSIN	TQJ	P09237	C19H25BrN6O4S	513.409	512.084	56	58	128.21	1.13	3.04	1	7	11	O=CN([C@H](CS(=O)(=O)N1CCN(CC1)c1ccc(cn1)Br)CCCc1ncccn1)O	1	C305H101CaN73O84S3Zn+5	train	ZnCa
2y81	refined	Protein-Ligand	1.7	Ki=2nM	Ki	8.7	2011	ACTIVATED FACTOR XA HEAVY CHAIN	931	P00742	C24H24ClFN3O3S	488.982	488.121	57	61	91.47	4.01	6.22	2	3	5	Clc1ccc2c(c1)ccc(c2)S(=O)(=O)N[C@H]1CCN(C1=O)c1ccc(cc1F)[C@@H]1[NH2+]CCC1	1	C316H115MgN84O96S6+8	train	Mg
2y82	refined	Protein-Ligand	2.2	Ki=4nM	Ki	8.4	2011	ACTIVATED FACTOR XA HEAVY CHAIN	930	P00742	C24H24ClFN3O3S	488.982	488.121	57	61	91.47	4.01	6.22	2	3	5	Clc1ccc2c(c1)ccc(c2)S(=O)(=O)N[C@H]1CCN(C1=O)c1ccc(cc1F)[C@H]1[NH2+]CCC1	1	C316H115MgN84O96S6+8	train	Mg
2yay	refined	Protein-Ligand	1.86	Kd=0.8uM	Kd	6.1	2011	DUTPASE	DUP	O15826	C9H21N3O13P3	472.197	472.029	49	50	294.9	-5.57	-1.85	4	10	9	OC1=CCN(C(=O)N1)[C@H]1C[C@@H]([C@H](O1)COP(NP(OP(O)(O)O)(O)O)(O)O)O	1	C363H125Ca2N91O99S4+6	train	Ca
2yaz	refined	Protein-Ligand	2.4	Kd=7.3uM	Kd	5.14	2011	DUTPASE	UMP	O15826	C9H14N2O8P	309.19	309.049	34	35	167.83	-3.14	-2.14	2	6	4	O[C@H]1C[C@@H](O[C@@H]1COP(O)(O)O)n1ccc(=O)[nH]c1=O	1	C332H113MgN85O89S4+7	test	Mg
2yb9	general	Protein-Ligand	2.4	IC50=0.6nM	IC50	9.22	2011	NEPRILYSIN	HA0	P08473	C24H30N2O6	442.505	442.21	62	64	129.73	6.01	4.3	1	6	10	CCC[C@@H](C(=O)O)CC1(CCCC1)C(=O)N[C@@H](C(=O)O)Cc1ncc(o1)c1ccccc1	1	C401H133N101O105S2Zn+6	train	Zn
2ybk	general	Protein-Ligand	2.4	IC50=24uM	IC50	4.62	2011	LYSINE-SPECIFIC DEMETHYLASE 4A	2HG	O75164	C5H8O5	148.114	148.037	18	17	94.83	1.35	-0.7	1	5	3	OC(=O)CC[C@H](C(=O)O)O	1	C245H88N58NiO70S2+4	train	XX
2ybp	general	Protein-Ligand	2.02	IC50=24uM	IC50	4.62	2011	LYSINE-SPECIFIC DEMETHYLASE 4A	2HG	O75164 Q16695	C5H8O5	148.114	148.037	18	17	94.83	1.35	-0.7	1	5	3	OC(=O)CC[C@H](C(=O)O)O	1	C259H94N62NiO76S2+4	valid	XX
2ybs	general	Protein-Ligand	2.32	IC50=26uM	IC50	4.59	2011	LYSINE-SPECIFIC DEMETHYLASE 4A	S2G	O75164 Q16695	C5H8O5	148.114	148.037	18	17	94.83	1.35	-0.7	1	5	3	OC(=O)CC[C@@H](C(=O)O)O	1	C257H92N62NiO76S2+4	valid	XX
2yc0	general	Protein-Ligand	2.15	IC50=1500uM	IC50	2.82	2011	HYPOXIA-INDUCIBLE FACTOR 1-ALPHA INHIBITOR	2HG	Q9NWT6	C5H8O5	148.114	148.037	18	17	94.83	1.35	-0.7	1	5	3	OC(=O)CC[C@H](C(=O)O)O	1	C257H86FeN66O63S+6	train	Fe
2yc5	general	Protein-Ligand	1.6	IC50=0.035uM	IC50	7.46	2011	2-C-METHYL-D-ERYTHRITOL 4-PHOSPHATE CYTIDYLYLTRANSFERASE, CHLOROPLASTIC	6BC	P69834	C14H9ClN4O	284.7	284.046	29	31	71.04	2.55	1.97	0	3	2	N#Cc1cnn2c1N=C(Cl)[C@H](C2=O)Cc1ccccc1	1	C311H108CdN75O87S2+5	test	XX
2ycf	general	Protein-Ligand	1.77	IC50=0.03nM	IC50	10.52	2011	SERINE/THREONINE-PROTEIN KINASE CHK2	YCF	O96017	C19H28N10O3	444.491	444.235	60	61	219.8	3.96	1.4	4	3	10	ONC(=[NH2+])/[NH]=N/[C@H](c1ccc(cc1)NC(=O)Nc1ccc(cc1)[C@H](/N=[NH+]/C(\NO)/N)C)C	1	C290H96MgN78O85S2+10	train	Mg
2yde	general	Protein-Ligand	2.28	IC50=189uM	IC50	3.72	2011	HYPOXIA-INDUCIBLE FACTOR 1-ALPHA INHIBITOR	S2G	Q9NWT6	C5H8O5	148.114	148.037	18	17	94.83	1.35	-0.7	1	5	3	OC(=O)CC[C@@H](C(=O)O)O	1	C268H89FeN68O64S+6	train	Fe
2yhw	refined	Protein-Ligand	1.64	Kd=2.5uM	Kd	5.6	2012	BIFUNCTIONAL UDP-N-ACETYLGLUCOSAMINE 2-EPIMERASE/N-ACETYLMANNOSAMINE KINASE	BM3	Q9Y223	C8H15NO6	221.208	221.09	30	30	119.25	-2.59	-2.69	5	5	7	OC[C@H]1O[C@H](O)[C@H]([C@H]([C@@H]1O)O)NC(=O)C	1	C244H94CaN72O82S6Zn+2	train	ZnCa
2yhy	general	Protein-Ligand	1.82	Kd=2.5uM	Kd	5.6	2012	BIFUNCTIONAL UDP-N-ACETYLGLUCOSAMINE 2-EPIMERASE/N-ACETYLMANNOSAMINE KINASE	BM3	Q9Y223	C8H15NO6	221.208	221.09	30	30	119.25	-2.59	-2.69	5	5	7	OC[C@H]1O[C@H](O)[C@H]([C@H]([C@@H]1O)O)NC(=O)C	1	C256H103CaMgN78O86S6Zn+3	test	ZnMgCa
2yig	general	Protein-Ligand	1.7	IC50=79.4nM	IC50	7.1	2011	COLLAGENASE 3	5EL	P45452	C28H28N3O3	454.54	454.213	62	66	75.89	3.07	4.16	2	3	8	O=C(c1ccc(cc1)Oc1ccc(cc1)C#C[C@]1(O)C[N@@H+]2CC[C@H]1CC2)NCc1ccncc1	1	C300H84CaN68O77S2Zn+6	train	ZnCa
2yz3	refined	Protein-Ligand	2.3	Ki=220nM	Ki	6.66	2008	VIM-2	M5P	Q7BJM5	C12H16O2S	224.319	224.087	31	31	76.1	4.1	2.64	0	2	6	SC[C@H](C(=O)O)CCCc1ccccc1	1	C233H81N69O74SZn2+5	valid	Zn
2z3h	general	Protein-Ligand	1.5	Ki=23uM	Ki	4.64	2007	BSD	BLO	P0C2P0	C17H27N7O6	425.44	425.202	57	58	213.18	-2.55	-2.34	3	5	8	[NH3+][C@H](CC(=O)N[C@H]1C=C[C@@H](O[C@@H]1C(=O)O)n1ccc(=O)[nH]c1=O)CC[N+](=C(N)N)C	1	C270H82N73O78S3Zn+3	valid	Zn
2z4w	general	Protein-Ligand	2.45	IC50=0.98uM	IC50	6.01	2008	Geranylgeranyl pyrophosphate synthetase	749	Q12051	C21H40O6P2	450.486	450.23	69	68	148.56	3.55	5.04	0	6	10	CC(/C=C/C/C(=C/CC(P(O)(O)O)(P(O)(O)O)C/C=C(/C/C=C/C(C)C)\C)/C)C	1	C260H99Mg2N78O87+10	train	Mg
2z4z	general	Protein-Ligand	2.09	IC50=1.86uM	IC50	5.73	2008	Geranylgeranyl pyrophosphate synthetase	SC0	Q12051	C17H36O6P2	398.412	398.199	61	60	148.56	3.02	4.21	0	6	12	CCCCC/C=C/CC(P(O)(O)O)(P(O)(O)O)C/C=C/CCCCC	1	C418H167MgN117O124S+12	test	Mg
2z52	general	Protein-Ligand	2.13	IC50=2.69uM	IC50	5.57	2008	Geranylgeranyl pyrophosphate synthetase	H23	Q12051	C12H30O7P2	348.31	348.147	51	50	168.79	1.23	2.03	1	7	11	CCCCCCCCCCCC(P(O)(O)O)(P(O)(O)O)O	1	C326H137Mg3N87O97S2+9	train	Mg
2z7g	general	Protein-Ligand	2.52	Ki=1.13nM	Ki	8.95	2008	Bos taurus Adenosine deaminase (ADA)	EH9	P56658	C14H23N5O	277.365	277.19	43	44	89.85	2.3	2.88	2	4	8	CCCCCC[C@@H](n1cnc2c1ncnc2N)[C@@H](O)C	1	C318H109N82O86S5Zn+7	valid	Zn
2z7h	general	Protein-Ligand	2.08	Ki=115nM	Ki	6.94	2008	GGPPS	GG3	Q12051	C14H28NO7P2	384.322	384.134	52	52	173.23	-3.57	-0.96	2	7	9	C[N@@H+](CCC(P(O)(O)O)(P(O)(O)O)O)CCCCc1ccccc1	1	C349H140MgN95O103S+11	valid	Mg
2z94	refined	Protein-Ligand	1.78	Ki=1.4uM	Ki	5.85	2007	Replicase polyprotein 1ab	TLD	P0C6X7	C7H8S2	156.268	156.007	17	17	77.6	2.59	2.57	0	0	2	Cc1ccc(c(c1)S)S	1	C175H70N53O48S5Zn+3	train	Zn
2z9g	general	Protein-Ligand	1.86	Ki=0.7uM	Ki	6.15	2007	Replicase polyprotein 1ab	BNZ	P0C6X7	C6H6	78.112	78.047	12	12	0	1.92	1.69	0	0	0	c1ccccc1	1	C158H63HgN48O45S5+3	valid	XX
2za0	refined	Protein-Ligand	1.7	Ki=0.23uM	Ki	6.64	2008	GLO1	MGI	Q9CPU0	C16H16O6	304.295	304.095	38	39	96.22	3.52	3	3	4	7	COC(=O)c1c(C)cc(cc1O)Oc1cc(C)cc(c1O)O	1	C295H102N75O77S3Zn+8	train	Zn
2zcq	refined	Protein-Ligand	2.38	Ki=1.5nM	Ki	8.82	2008	CrtM	B65	A9JQL9	C16H22O7PS	389.38	389.082	47	48	169.5	1.57	4.09	0	6	6	OP([C@H](S(O)(O)O)CCCc1cccc(c1)Oc1ccccc1)(O)O	1	C361H126Mg2N91O98S3+7	train	Mg
2zcr	refined	Protein-Ligand	1.92	Ki=135nM	Ki	6.87	2008	CrtM	B69	A9JQL9	C20H30O6PS	429.487	429.15	58	59	160.27	3.55	5.31	0	6	8	CCCCc1ccc(cc1)c1ccc(cc1)CCC[C@@H](S(O)(O)O)P(O)(O)O	1	C407H158MgN103O122S4+6	train	Mg
2zir	general	Protein-Ligand	2.4	IC50=6.4nM	IC50	8.19	2009	Protein farnesyltransferase	NH7	Q02293 Q04631	C30H28ClN4O4	544.021	543.18	67	72	93.96	4.17	5.29	3	3	8	Clc1ccc(cc1)[C@](c1cncn1C)(c1cc2c(o1)c(cc(c2)C(=O)N[NH+]1CCOCC1)c1ccccc1)O	1	C394H135N97O103S6Zn+7	valid	Zn
2zis	general	Protein-Ligand	2.6	IC50=2.8nM	IC50	8.55	2009	Protein farnesyltransferase	NH8	Q02293 Q04631	C27H17N5O4	475.455	475.128	53	57	144.59	3.67	5.29	1	6	5	N#Cc1ccc(cc1)[C@](c1cncn1C)(c1oc2c(c1)cc(cc2c1cccc(c1)C#N)N(=O)=O)O	1	C383H126N100O97S6Zn+8	train	Zn
2zkj	refined	Protein-Ligand	2	Kd=3.3uM	Kd	5.48	2008	Pyruvate dehydrogenase kinase isozyme 4( K-Pi buffer)	ADP	Q16654	C10H17N5O10P2	429.217	429.045	44	46	266.1	-4.89	-2.04	3	10	7	O[C@@H]1[C@@H](COP(OP(O)(O)O)(O)O)O[C@H]([C@@H]1O)n1cnc2c1ncnc2N	1	C348H103MgN90O98S2+8	train	Mg
2zof	general	Protein-Ligand	2.3	IC50=7nM	IC50	8.15	2008	mouse carnosinase CN2	BES	Q9D1A2	C16H25N2O4	309.381	309.181	47	47	114.27	-0.08	0.21	3	4	9	O[C@@H]([C@@H](Cc1ccccc1)[NH3+])C(=O)N[C@H](C(=O)O)CC(C)C	1	C347H133Mn2N101O111S2+9	train	Mn
2zq0	refined	Protein-Ligand	1.6	Ki=0.15uM	Ki	6.82	2008	Alpha-glucosidase (Alpha-glucosidase SusB)	ACR	G8JZS4	C25H44NO18	646.613	646.256	88	91	325.75	-8.53	-9.59	14	13	22	OC[C@H]1O[C@H](O[C@@H]2[C@@H](CO)O[C@@H]([C@@H]([C@H]2O)O)O)[C@@H]([C@H]([C@@H]1O[C@H]1O[C@H](C)[C@H]([C@@H]([C@H]1O)O)[NH2+][C@H]1C=C(CO)[C@H]([C@@H]([C@H]1O)O)O)O)O	1	C299H104CaN83O96S+6	train	Ca
2zsc	general	Protein-Ligand	1.3	Kd=87nM	Kd	7.06	2009	Tamavidin2	BTN	B9A0T7	C10H16N2O3S	244.311	244.088	32	33	103.73	1.78	1.45	2	3	4	OC(=O)CCCC[C@@H]1SC[C@H]2[C@@H]1NC(=O)N2	1	C296H87MgN71O89S+3	train	Mg
2zvj	general	Protein-Ligand	2.3	IC50=1.8uM	IC50	5.74	2009	Catechol O-methyltransferase(COMT)	KOM	P22734	C15H10O4	254.237	254.058	29	31	70.67	2.38	2.87	2	3	3	O=c1cc(c2ccccc2)c2c(o1)c(O)c(cc2)O	1	C201H68MgN46O55S3+2	train	Mg
2zxg	refined	Protein-Ligand	1.55	Ki=1.5nM	Ki	8.82	2009	Aminopeptidase N	S23	P04825	C21H29N2O5P	420.439	420.181	58	59	148.09	-0.17	1.47	2	5	10	O=C([C@@H](CP([C@@H]([NH3+])C)(O)O)Cc1ccccc1)N[C@H](C(=O)O)Cc1ccccc1	1	C390H133N106O117S4Zn+10	valid	Zn
3a1e	refined	Protein-Ligand	1.95	Kd=2.2mM	Kd	2.66	2009	Probable copper-exporting P-type ATPase A(H462Q)	ACP	O29777	C11H21N5O12P3	508.232	508.04	52	54	320.15	-6.21	-2.25	3	12	9	O[C@@H]1[C@@H](COP(OP(CP(O)(O)O)(O)O)(O)O)O[C@H]([C@@H]1O)n1cnc2c1ncnc2N	1	C276H109MgN74O91+4	train	Mg
3a1s	general	Protein-Ligand	1.5	Kd=14.8uM	Kd	4.83	2009	Iron(II) transport protein B	GDP	Q9WXQ8	C10H18N5O11P2	446.224	446.048	46	48	287.32	-4.43	-3.33	2	9	7	O[C@@H]1[C@@H](COP(OP(O)(O)O)(O)O)O[C@H]([C@@H]1O)n1cnc2c1[nH]c(N)[nH+]c2=O	1	C182H75Mg2N48O65S+3	valid	Mg
3a9i	refined	Protein-Ligand	1.8	Ki=70.7uM	Ki	4.15	2009	Homocitrate synthase	LYS	O87198	C6H16N2O2	148.203	148.121	26	25	92.58	-2.35	-1.91	2	2	4	[NH3+]CCCC[C@@H](C(=O)O)[NH3+]	1	C299H112CoN75O88+7	train	XX
3aas	refined	Protein-Ligand	1.75	Ki=31uM	Ki	4.51	2010	Bovine beta-trypsin	GUS	P00760	C11H15N4O3	251.262	251.114	33	33	133.53	2.78	-0.46	1	3	4	OC(=O)[C@@H](/N=C/c1cc(ccc1O)NC(=[NH2+])N)C	1	C221H84CuN57O69S5+4	test	XX
3aav	general	Protein-Ligand	1.7	Ki=0.24uM	Ki	6.62	2010	Bovine beta-trypsin	A2C	P00760	C18H28N6O2	360.454	360.227	54	55	176.9	4.32	-3.75	4	2	11	NC(=[NH2+])c1ccc(c(c1)C[NH2+]CC[NH2+]Cc1cc(ccc1O)C(=[NH2+])N)O	1	C214H76CuN59O70S5+3	train	XX
3ahn	refined	Protein-Ligand	1.8	Ki=90.1nM	Ki	7.05	2010	Oligopeptidase	3A1	Q4W803	C29H43N4O8P	606.647	606.282	85	86	226.52	-1.28	1.01	5	8	21	OC[C@H](C(=O)O)NC(=O)[C@@H](NC(=O)[C@@H](CP([C@H](Cc1ccccc1)NC(=O)Cc1ccccc1)(O)O)C)CCCC[NH3+]	1	C511H169N121O143S3Zn+5	train	Zn
3aho	refined	Protein-Ligand	1.88	Ki=88.9nM	Ki	7.05	2010	Oligopeptidase	3A2	Q4W803	C29H46N5O8P	623.678	623.308	89	91	217.81	-1.29	0.53	3	8	18	CCCC[C@H](C(=O)O)NC(=O)[C@@H]1CCCN1C(=O)CCP([C@H](Cc1ccccc1)NC(=O)[C@@H]1CCCN1C(=O)C[NH3+])(O)O	1	C489H160N112O133S3Zn+6	test	Zn
3aig	general	Protein-Ligand	2.8	IC50=1uM	IC50	6	1998	adamalysin ii	0ZC	P34179	C23H25N3O5	423.462	423.179	56	59	115.64	4.05	3.27	2	4	7	CC(C[C@@H](C(=O)N1Cc2[nH]c3c(c2C[C@H]1C(=O)O)cccc3)NC(=O)c1ccco1)C	1	C232H77N63O63S4Zn+8	train	Zn
3alt	refined	Protein-Ligand	2.5	Kd=1.19mM	Kd	2.92	2011	Lectin CEL-IV	MLB	Q7M4F9	C12H22O11	342.296	342.116	45	46	189.53	-4.73	-5.4	8	8	12	OC[C@H]1O[C@H](OC[C@H]2O[C@H](O)[C@@H]([C@H]([C@@H]2O)O)O)[C@@H]([C@H]([C@H]1O)O)O	1	C171H51CaN45O51+	train	Ca
3arn	general	Protein-Ligand	1.8	IC50=3.9uM	IC50	5.41	2010	Deoxyuridine 5'-triphosphate nucleotidohydrolase	MSJ	P33316	C17H23N3O5S	381.447	381.136	49	50	118.64	1.15	2.52	2	4	9	O=c1ccn(c(=O)[nH]1)COCCCC(NS(=O)(=O)c1ccccc1)(C)C	1	C192H68MgN53O53+6	test	Mg
3axk	general	Protein-Ligand	1.9	Ki=70uM	Ki	4.15	2012	Ribulose bisphosphate carboxylase	NDP	P0C512 Q0INY7	C21H33N7O17P3	748.445	748.115	81	85	414.4	-7.2	-2.66	5	14	15	O[C@@H]1[C@H](O)[C@H](O[C@H]1N1C=CCC(=C1)C(=O)N)COP(OP(OC[C@H]1O[C@H]([C@@H]([C@@H]1O)OP(O)(O)O)n1cnc2c1ncnc2N)(O)O)(O)O	1	C355H131MgN96O103S3+8	test	Mg
3axm	general	Protein-Ligand	1.65	Ki=8.5uM	Ki	5.07	2012	Ribulose bisphosphate carboxylase	6PG	P0C512 Q0INY7	C6H14O10P	277.143	277.032	31	30	201.73	-3.74	-3.81	4	9	9	O[C@@H]([C@H]([C@@H]([C@H](C(=O)O)O)O)O)COP(O)(O)O	1	C269H102MgN77O84S3+5	train	Mg
3b3c	refined	Protein-Ligand	1.46	Ki=105uM	Ki	3.98	2007	M180A mutant of the aminopeptidase	PLU	Q01693	C5H16NO3P	169.159	169.087	26	25	101.92	-3.13	-0.66	1	3	2	[NH3+][C@H](P(O)(O)O)CC(C)C	1	C212H83N55O78S3Zn2+3	train	Zn
3b3s	refined	Protein-Ligand	1.18	Ki=2800uM	Ki	2.55	2007	Bacterial leucyl aminopeptidase	LEU	Q01693	C6H14NO2	132.181	132.102	23	22	64.94	-0.79	-0.27	1	2	2	[NH3+][C@H](C(=O)O)CC(C)C	1	C214H87N59O80S3Zn2+4	train	Zn
3b3w	refined	Protein-Ligand	1.75	Ki=65uM	Ki	4.19	2007	Bacterial leucyl aminopeptidase	LEU	Q01693	C6H14NO2	132.181	132.102	23	22	64.94	-0.79	-0.27	1	2	2	[NH3+][C@H](C(=O)O)CC(C)C	1	C177H78N46O63S4Zn2+3	train	Zn
3b4f	refined	Protein-Ligand	1.89	Ki=7.2nM	Ki	8.14	2008	hCA IIa	TUO	P00918	C15H15N4O3S	331.37	331.086	38	40	141.07	1.1	2.54	4	3	4	[NH3+]NC(=O)c1[nH]c2c(c1c1ccccc1)cc(cc2)S(=O)(=O)N	1	C364H105N93O80S2Zn+6	train	Zn
3b7i	refined	Protein-Ligand	1.75	Ki=1.5uM	Ki	5.82	2007	S228A mutant of the aminopeptidase	PLU	Q01693	C5H16NO3P	169.159	169.087	26	25	101.92	-3.13	-0.66	1	3	2	[NH3+][C@H](P(O)(O)O)CC(C)C	1	C235H95N60O87S4Zn2+4	valid	Zn
3b7r	refined	Protein-Ligand	1.81	Ki=20nM	Ki	7.7	2008	Leukotriene A-4 hydrolase	BIR	P09960	C21H29N2O5P	420.439	420.181	58	59	148.09	-0.14	1.91	2	5	9	C[C@@H](C(=O)O)NC(=O)[C@@H](CP([C@@H]([NH3+])C)(O)O)Cc1ccc(cc1)c1ccccc1	1	C399H138N106O117S3Zn+8	train	Zn
3b7u	refined	Protein-Ligand	1.9	Ki=18nM	Ki	7.74	2008	human Leukotriene A-4 hydrolase (LTA4H)	KEL	P09960	C14H18N2O5	294.303	294.122	39	39	115.73	1.1	1.11	3	5	9	ONC(=O)C[C@H](C(=O)N[C@H](C(=O)O)C)Cc1ccccc1	1	C343H123N91O104S2Zn+7	train	Zn
3b8z	general	Protein-Ligand	1.4	IC50=0.29uM	IC50	6.54	2007	protein ADAMTS-5	294	Q9UNA0	C19H18F3NO6S	445.41	445.081	48	50	110.31	2.63	4.8	2	4	7	ONC(=O)C1(CCOCC1)S(=O)(=O)c1ccc(cc1)Oc1ccc(cc1)C(F)(F)F	1	C256H94CaN71O79S4Zn+7	train	ZnCa
3b92	refined	Protein-Ligand	2	Ki=10nM	Ki	8	2007	ADAM 17	440	P78536	C13H16O3S2	284.394	284.054	34	34	90.55	2.4	3.26	0	2	8	SCCCS(=O)(=O)c1ccc(cc1)OCC#CC	1	C273H88N68O77S3Zn+8	valid	Zn
3b9g	general	Protein-Ligand	1.4	Ki=19uM	Ki	4.72	2008	3GTvNH mutant	IMH	Q9GPQ4	C11H15N4O4	267.261	267.109	34	36	138.84	-2.3	-1.48	6	4	5	OC[C@H]1[NH2+][C@H]([C@@H]([C@@H]1O)O)c1c[nH]c2c1nc[nH]c2=O	1	C295H89CaN71O81S4+	train	Ca
3bb1	general	Protein-Ligand	2.8	Kd=0.25mM	Kd	3.6	2008	psToc34	GNP	Q41009	C10H21N6O13P3	526.227	526.038	53	55	353.4	-5.89	-3.69	3	11	9	O[C@@H]1[C@@H](COP(OP(NP(O)(O)O)(O)O)(O)O)O[C@H]([C@@H]1O)n1cnc2c1[nH]c(N)[nH+]c2=O	1	C313H101MgN92O101S+9	valid	Mg
3bet	general	Protein-Ligand	1.85	IC50=1.5uM	IC50	5.82	2008	hCAII	CTF	P00918	C21H28N2O4S	404.523	404.177	56	59	110.79	4.22	5.44	1	3	4	N#CC[C@H]1CC[C@@H]2[C@]1(C)CC[C@H]1[C@H]2CCc2c1cc(OC)c(c2)OS(=O)(=O)N	1	C321H98N84O73SZn+5	train	Zn
3bhx	general	Protein-Ligand	1.6	IC50=0.7nM	IC50	9.15	2008	rhGCPII	BHX	Q04609	C9H16O8P	283.192	283.058	34	33	165.95	1.78	-0.14	0	8	6	OC(=O)CC[C@@H](C(=O)O)CP(CCC(=O)O)(O)O	1	C326H109N95O100Zn2+11	train	Zn
3bi0	general	Protein-Ligand	1.67	IC50=14nM	IC50	7.85	2008	rhGCPII	BIX	Q04609	C10H20NO8P	313.241	313.093	40	39	193.59	-1.51	-1.53	1	8	7	OC(=O)CC[C@@H](C(=O)O)CP(CC[C@@H](C(=O)O)[NH3+])(O)O	1	C351H119N100O106Zn2+12	train	Zn
3bi1	general	Protein-Ligand	1.5	IC50=0.12nM	IC50	9.92	2008	rhGCPII	3BI	Q04609	C25H32N8O9P	619.544	619.203	75	77	301.89	1.54	1.74	3	13	13	OC(=O)CC[C@@H](C(=O)O)CP(CC[C@H](C(=O)O)NC(=O)c1ccc(cc1)N(Cc1cnc2c(n1)c(N)nc(n2)N)C)(O)O	1	C454H156N133O138Zn2+15	train	Zn
3bjc	general	Protein-Ligand	2	IC50=0.11uM	IC50	6.96	2008	PDE-5	WAN	O76074	C15H19N5O4S2	397.472	397.088	45	47	169.58	1.43	3.16	2	4	6	CCCc1nn(c2c1nc([nH]c2=O)c1cc(sc1OCC)S(=O)(=O)N)C	1	C366H133MgN93O98S6Zn+7	train	ZnMg
3bkk	refined	Protein-Ligand	2.17	Ki=0.83uM	Ki	6.08	2008	tACE-G13	KAF	P12821	C28H30N2O6	490.548	490.21	66	68	135.96	3.91	3.08	4	6	15	O=C(N[C@H](C(=O)O)Cc1ccccc1)CCC([C@@H](NC(=O)c1ccccc1)Cc1ccccc1)(O)O	1	C475H158N122O131S4Zn+10	test	Zn
3bkl	refined	Protein-Ligand	2.18	Ki=0.679uM	Ki	6.17	2008	tACE-G13	KAW	P12821	C30H31N3O6	529.584	529.221	70	73	151.75	4.04	3.56	5	6	15	O=C(N[C@H](C(=O)O)Cc1c[nH]c2c1cccc2)CCC([C@@H](NC(=O)c1ccccc1)Cc1ccccc1)(O)O	1	C476H163N124O131S5Zn+10	test	Zn
3bpc	refined	Protein-Ligand	1.85	Kd=16uM	Kd	4.8	2009	Fab, antibody fragment (IgG1k)	2-mer	P01837	C19H28O13	464.418	464.153	60	61	212.67	0	-2.32	5	9	13	C/C=C\O[C@@]1(C[C@@H](O)[C@H]([C@H](O1)[C@@H](CO[C@@]1(C=CC[C@H](O1)[C@@H](CO)O)C(=O)O)O)O)C(=O)O	1	C234H75MgN66O63Zn+9	train	ZnMg
3c0z	general	Protein-Ligand	2.1	IC50=113uM	IC50	3.95	2008	Histone deacetylase 7a	SHH	Q8WUI4	C5H11NO2	117.146	117.079	19	18	49.33	0.42	1.07	2	2	5	CCCCC(=O)NO	1	C211H75N62O61S2Zn+6	train	Zn
3c10	general	Protein-Ligand	2	IC50=0.3uM	IC50	6.52	2008	Histone deacetylase 7a	TSN	Q8WUI4	C17H22N2O3	302.368	302.163	44	44	69.64	2.75	2.97	2	3	8	ONC(=O)/C=C/C(=C/[C@H](C(=O)c1ccc(cc1)N(C)C)C)/C	1	C254H87N77O74S3Zn+8	valid	Zn
3c14	general	Protein-Ligand	2.68	Ki=300uM	Ki	3.52	2009	Adenylate cyclase	POP	P04896 P26769 P30803	H6O7P2	179.991	179.959	15	14	157.79	-3.51	-1.69	0	6	0	OP(OP(O)(O)O)(O)O	1	C97H44CaN29O35S2+2	train	Ca
3c52	refined	Protein-Ligand	2.3	Ki=0.05uM	Ki	7.3	2008	H. pylori Class II Fba	PGH	P56109	C2H7NO6P	172.054	172.001	17	16	132.84	-2.86	-1.45	2	5	4	ONC(=O)COP(O)(O)O	1	C237H91N68O72SZn+6	train	Zn
3c56	refined	Protein-Ligand	2.3	Ki=0.013uM	Ki	7.89	2008	H. pylori Class II Fba	PH4	P56109	C5H15NO10P2	311.121	311.017	33	32	207.56	-4.26	-2.06	1	8	8	ON(C(=O)COP(O)(O)O)CCCOP(O)(O)O	1	C277H105N80O82S2Zn+8	train	Zn
3c6w	general	Protein-Ligand	1.75	Kd=2.4uM	Kd	5.62	2008	Inhibitor of growth protein 5	12-mer	Q8WYH8	C34H67N12O11	819.97	819.505	124	123	389.1	-5.25	-3.89	11	11	36	NC(=O)CC[C@@H](C(=O)N[C@H](C(=O)N[C@H](C(=O)O)C)[C@H](O)C)NC(=O)[C@@H](NC(=O)[C@H]([C@H](O)C)NC(=O)[C@@H](NC(=O)[C@@H]([NH3+])C)CCC[NH+]=C(N)N)CCCC[N+](C)(C)C	1	C204H58N47O56S5Zn+4	train	Zn
3c72	general	Protein-Ligand	2.3	IC50=22.7uM	IC50	4.64	2008	RabGGTase	CX1	Q08602 Q08603	C33H35N5O7	613.66	613.254	80	83	173.95	4.58	3.62	4	7	18	O=C(N[C@H](C(=O)N([C@H](C(=O)N[C@H](C(=O)O)Cc1ccc(cc1)O)Cc1ccccc1)C)Cc1c[nH]cn1)OCc1ccccc1	1	C448H149N112O119S9Zn+6	valid	Zn
3c7p	general	Protein-Ligand	1.7	IC50=0.1nM	IC50	10	2009	Carbonic anhydrase 2	POF	P00918	C24H27N3O5S	469.553	469.167	60	64	128.04	2.34	4.4	1	5	4	O=C1C[C@H]2[C@@H]3CCc4c([C@H]3CC[C@@]2(C(=O)N1Cc1cccnc1)C)ccc(c4)OS(=O)(=O)N	1	C296H91N77O71SZn+5	train	Zn
3c88	refined	Protein-Ligand	1.6	Ki=157nM	Ki	6.8	2008	Botulinum neurotoxin A	5-mer	P0DPI1	C17H37N10O5S	493.605	493.267	70	69	323.06	-2.42	-5.06	5	5	21	SC[C@@H](C(=O)O)NC(=O)CNC(=O)[C@@H](NC(=O)[C@H](CCC[NH+]=C(N)N)[NH3+])CCC[NH+]=C(N)N	1	C411H144N102O114SZn+9	test	Zn
3c89	refined	Protein-Ligand	1.58	Ki=845nM	Ki	6.07	2008	Botulinum neurotoxin A	5-mer	P0DPI1	C19H41N10O5S	521.658	521.298	76	75	309.56	-1.71	-4.24	5	5	22	CSCC[C@@H](C(=O)O)NC(=O)CNC(=O)[C@@H](NC(=O)[C@H](CCC[NH+]=C(N)N)[NH3+])CCC[NH+]=C(N)N	1	C435H146N103O118SZn+8	valid	Zn
3c8a	refined	Protein-Ligand	1.52	Ki=660nM	Ki	6.18	2008	Botulinum neurotoxin A	5-mer	P0DPI1	C20H43N10O5	503.619	503.342	78	77	284.26	-1.03	-3.94	5	5	21	CC(C[C@@H](C(=O)O)NC(=O)CNC(=O)[C@@H](NC(=O)[C@H](CCC[NH+]=C(N)N)[NH3+])CCC[NH+]=C(N)N)C	1	C417H150N99O119SZn+8	valid	Zn
3c8b	refined	Protein-Ligand	1.47	Ki=786nM	Ki	6.1	2008	Botulinum neurotoxin A	5-mer	P0DPI1	C20H43N10O5	503.619	503.342	78	77	284.26	-1.03	-3.94	5	5	21	CC[C@@H]([C@@H](C(=O)O)NC(=O)CNC(=O)[C@@H](NC(=O)[C@H](CCC[NH+]=C(N)N)[NH3+])CCC[NH+]=C(N)N)C	1	C409H138N92O111SZn+7	test	Zn
3c94	general	Protein-Ligand	2.7	Kd=136nM	Kd	6.87	2008	exonuclease Ⅰ(Exol) from E. coli	10-mer	A0A0H3GL04 P04995 P0AGE0	C24H35N4O7	491.557	491.251	70	71	180.75	0.91	0.13	3	7	13	CC[C@@H]([C@@H](C(=O)N1CCC[C@H]1C(=O)N[C@H](C(=O)O)Cc1ccccc1)NC(=O)[C@H](CC(=O)O)[NH3+])C	1	C190H66MgN58O51S+7	train	Mg
3c9e	general	Protein-Ligand	1.8	Kd=10nM	Kd	8	2008	Cathepsin K	E64	P43235	C15H30N5O5	360.429	360.225	55	54	181.74	2.2	-1.21	3	5	14	CC(C[C@@H](C(=O)NCCCC[NH+]=C(N)N)NC(=O)[C@H](CC(=O)O)O)C	1	C299H103CaN85O98S5+	valid	Ca
3caj	general	Protein-Ligand	1.8	Ki=8nM	Ki	8.1	2008	hCA II	EZL	P00918	C9H10N2O3S2	258.317	258.013	26	27	118.9	1.61	3.12	1	3	3	CCOc1ccc2c(c1)sc(n2)S(=O)(=O)N	1	C312H95N79O69SZn+6	train	Zn
3cho	general	Protein-Ligand	1.8	IC50=280nM	IC50	6.55	2008	Leukotriene A-4 hydrolase	4BG	P09960	C15H17N2O2	257.308	257.129	36	37	65.97	1.65	1.52	2	1	6	[NH3+]CC(=O)Nc1ccc(cc1)OCc1ccccc1	1	C349H130N90O98S4Zn+5	valid	Zn
3chp	general	Protein-Ligand	2.1	IC50=5400nM	IC50	5.27	2008	Leukotriene A-4 hydrolase	4BO	P09960	C17H19N2O4	315.344	315.134	42	43	103.27	0.35	1.36	2	3	7	OC(=O)C[C@@H](C(=O)Nc1ccc(cc1)OCc1ccccc1)[NH3+]	1	C375H123N93O102S4Zn+6	train	Zn
3chq	general	Protein-Ligand	2.09	IC50=20nM	IC50	7.7	2008	Leukotriene A-4 hydrolase	4BQ	P09960	C18H21N2O4	329.37	329.15	45	46	103.27	0.15	1.75	2	3	8	O=C(Nc1ccc(cc1)OCc1ccccc1)CC[C@@H](C(=O)O)[NH3+]	1	C378H124N90O101S4Zn+6	train	Zn
3chr	general	Protein-Ligand	2.2	IC50=61nM	IC50	7.21	2008	Leukotriene A-4 hydrolase	4BS	P09960	C17H21N2O2	285.361	285.16	42	43	65.97	1.91	2.3	2	1	8	[NH3+]CCCC(=O)Nc1ccc(cc1)OCc1ccccc1	1	C379H125N93O102S4Zn+5	valid	Zn
3chs	general	Protein-Ligand	2.55	IC50=17nM	IC50	7.77	2008	Leukotriene A-4 hydrolase	4BU	P09960	C19H23N2O5	359.396	359.161	49	50	123.5	-0.5	1.29	3	4	10	O=C(Nc1ccc(cc1)OC[C@H](c1ccccc1)O)CC[C@@H](C(=O)O)[NH3+]	1	C402H141N101O112S4Zn+7	valid	Zn
3cph	general	Protein-Ligand	2.9	Kd=0.33uM	Kd	6.48	2008	Sec4 delta2a	GDP	P07560 P39958	C10H18N5O11P2	446.224	446.048	46	48	287.32	-4.43	-3.33	2	9	7	O[C@@H]1[C@@H](COP(OP(O)(O)O)(O)O)O[C@H]([C@@H]1O)n1cnc2c1[nH]c(N)[nH+]c2=O	1	C261H96MgN72O84S2+6	train	Mg
3cpj	general	Protein-Ligand	2.35	Kd=18.9uM	Kd	4.72	2008	Ypt31	GDP	P38555 P39958	C10H18N5O11P2	446.224	446.048	46	48	287.32	-4.43	-3.33	2	9	7	O[C@@H]1[C@@H](COP(OP(O)(O)O)(O)O)O[C@H]([C@@H]1O)n1cnc2c1[nH]c(N)[nH+]c2=O	1	C184H66MgN50O60S+5	valid	Mg
3cyu	general	Protein-Ligand	1.7	Kd=60nM	Kd	7.22	2008	Carbonic anhydrase 2	0CR	P00918	C74H70N10O18S	1419.47	1418.46	173	186	346.03	10.6	10.96	1	12	20	COc1cc2Cc3cc4O/C=C/Oc5cc6c(Cc7cc8O/C=C\Oc1cc2Cc1cc(OC)c(cc1Cc3cc4OC)OCCOc1cc(Cc7cc8OCc2nnn(c2)CCc2ccc(cc2)S(=O)(=O)N)c(C6)cc1OCc1nnn(c1)CCC(=O)O)cc5OCc1nnn(c1)CCC(=O)O	1	C373H109N97O86SZn+10	train	Zn
3czv	refined	Protein-Ligand	2	Ki=16nM	Ki	7.8	2008	Carbonic anhydrase 13	AZM	Q8N1Q1	C4H6N4O3S2	222.245	221.988	19	19	151.66	-1.23	1	2	5	3	CC(=O)Nc1nnc(s1)S(=O)(=O)N	1	C303H97N84O74Zn+8	train	Zn
3d27	general	Protein-Ligand	2.2	IC50=55.7uM	IC50	4.25	2008	E. coli methionine aminopeptidase	W29	P0AE18	C12H12O2S	220.287	220.056	27	28	68.7	3.35	3.39	2	2	4	CCc1ccsc1c1ccc(c(c1)O)O	1	C259H89Mn2N70O75S5+6	train	Mn
3d2r	general	Protein-Ligand	2.03	Kd=3.3uM	Kd	5.48	2008	Pyruvate dehydrogenase kinase isozyme 4(HEPES buffer)	ADP	Q16654	C10H17N5O10P2	429.217	429.045	44	46	266.1	-4.89	-2.04	3	10	7	O[C@@H]1[C@@H](COP(OP(O)(O)O)(O)O)O[C@H]([C@@H]1O)n1cnc2c1ncnc2N	1	C321H95MgN85O94S+7	train	Mg
3d3p	general	Protein-Ligand	1.75	IC50=3.16nM	IC50	8.5	2009	cAMP-specific 3	20A	Q07343	C21H25N5O2	379.456	379.201	53	56	81.07	2.85	3.44	2	3	7	CCn1ncc2c1ncc(c2NC1CCOCC1)C(=O)NCc1ccccc1	1	C400H143MgN106O116S5Zn+7	train	ZnMg
3d3x	general	Protein-Ligand	2.25	Ki=69uM	Ki	4.16	2008	Type E botulinum toxin	4-mer	Q9K395	C14H28N3O4S	334.455	334.18	50	49	148.44	-0.66	0.25	3	4	11	CSCC[C@@H](C(=O)O)NC(=O)[C@H]([C@H](CC)C)NC(=O)[C@@H]([NH3+])C	1	C297H108N75O94SZn+7	train	Zn
3d4y	refined	Protein-Ligand	1.52	Ki=2uM	Ki	5.7	2008	dGMII	MVL	Q24451	C8H12N2O4	200.192	200.08	26	27	98.74	-2.43	-1.81	4	5	5	OC[C@@H]1[C@@H](O)[C@H](O)[C@@H](c2n1ccn2)O	1	C243H88N59O73SZn+4	train	Zn
3d4z	refined	Protein-Ligand	1.39	Ki=13uM	Ki	4.89	2008	dGMII	GIM	Q24451	C8H12N2O4	200.192	200.08	26	27	98.74	-2.43	-1.81	4	5	5	OC[C@@H]1[C@@H](O)[C@H](O)[C@H](c2n1ccn2)O	1	C239H89N61O73SZn+5	train	Zn
3d50	refined	Protein-Ligand	1.79	Ki=17uM	Ki	4.77	2008	dGMII	OEV	Q24451	C15H30NO4	288.403	288.217	50	50	97.53	0.81	-0.71	5	4	13	CCCCCCCC[NH2+][C@@H]1C=C(CO)[C@H]([C@@H]([C@H]1O)O)O	1	C353H123N98O102S2Zn+9	test	Zn
3d51	refined	Protein-Ligand	1.43	Ki=70uM	Ki	4.15	2008	dGMII	GOX	Q24451	C6H12N2O5	192.17	192.075	25	25	125.54	-1.8	-2.85	6	5	6	OC[C@H]1N/C(=N\O)/[C@@H]([C@H]([C@@H]1O)O)O	1	C238H87N57O71SZn+4	train	Zn
3d52	refined	Protein-Ligand	1.6	Ki=520uM	Ki	3.28	2008	dGMII	GHR	Q24451	C13H16ClN3O6	345.736	345.073	39	40	143.64	-0.23	-0.35	6	5	9	OC[C@H]1N/C(=N\OC(=O)Nc2ccc(cc2)Cl)/[C@@H]([C@H]([C@@H]1O)O)O	1	C325H108N85O92S2Zn+7	train	Zn
3d7d	general	Protein-Ligand	1.69	IC50=14nM	IC50	7.85	2008	rhGCPII	FBD	Q04609	C16H19FN2O7S	402.395	402.09	46	46	178.33	3.94	1.91	2	7	10	OC(=O)[C@@H](NC(=O)N[C@H](C(=O)O)CCC(=O)O)CSCc1ccc(cc1)F	1	C399H134N112O122Zn2+12	train	Zn
3d7f	general	Protein-Ligand	1.54	IC50=0.5nM	IC50	9.3	2008	rhGCPII	YBY	Q04609	C15H17IN2O8	480.209	480.003	43	43	173.26	3.94	1.39	3	8	9	O=C(N[C@H](C(=O)O)CCC(=O)O)N[C@H](C(=O)O)Cc1ccc(c(c1)I)O	1	C351H120N97O102Zn2+13	train	Zn
3d7g	general	Protein-Ligand	1.75	IC50=17nM	IC50	7.77	2008	rhGCPII	MUD	Q04609	C10H16N2O7S	308.308	308.068	36	35	178.33	2.34	0.2	2	7	8	CSC[C@@H](C(=O)O)NC(=O)N[C@H](C(=O)O)CCC(=O)O	1	C344H120N97O103Zn2+13	train	Zn
3d7h	general	Protein-Ligand	1.55	IC50=0.06nM	IC50	10.22	2008	rhGCPII	YC2	Q04609	C19H24IN3O8	549.314	549.061	55	55	182.13	4.39	2.43	3	8	13	O=C(N[C@H](C(=O)O)CCC(=O)O)N[C@H](C(=O)O)CCCCNC(=O)c1ccc(cc1)I	1	C423H144N124O133SZn2+13	valid	Zn
3d7m	general	Protein-Ligand	2.9	Kd=0.36uM	Kd	6.44	2009	Guanine nucleotide-binding protein G(i), alpha-1 subunit(I56C/Q333C Galphai1)	GDP	P10824	C10H18N5O11P2	446.224	446.048	46	48	287.32	-4.43	-3.33	2	9	7	O[C@@H]1[C@@H](COP(OP(O)(O)O)(O)O)O[C@H]([C@@H]1O)n1cnc2c1[nH]c(N)[nH+]c2=O	1	C316H109MgN89O106S2+7	valid	Mg
3d8w	refined	Protein-Ligand	1.7	Ki=7.0nM	Ki	8.15	2009	Carbonic anhydrase II (CA II)	D8W	P00918	C8H8N4O4S3	320.369	319.971	27	28	177.11	0.12	2.92	2	6	4	O=S(=O)(c1ccccc1)Nc1nnc(s1)S(=O)(=O)N	1	C304H94N79O67SZn+5	train	Zn
3d9z	refined	Protein-Ligand	1.65	Ki=2.0nM	Ki	8.7	2009	Carbonic anhydrase II (CA II)	D9Z	P00918	C8H6ClN3O2S2	275.735	274.959	22	23	122.56	1.55	3.29	1	4	2	Clc1ccccc1c1nnc(s1)S(=O)(=O)N	1	C326H98N82O72S2Zn+5	test	Zn
3daz	refined	Protein-Ligand	1.6	Ki=11.8nM	Ki	7.93	2009	Carbonic anhydrase II (CA II)	MZM	P00918	C5H9N4O3S2	237.28	237.012	23	23	143.7	-0.52	1.22	2	4	3	CC(=O)Nc1sc(nn1C)S(=O)(=O)N	1	C296H92N74O67SZn+4	train	Zn
3dbu	refined	Protein-Ligand	1.7	Ki=8.8nM	Ki	8.06	2009	Carbonic anhydrase isozyme IX mimic(CA IX mimic)	D8W	P00918	C8H8N4O4S3	320.369	319.971	27	28	177.11	0.12	2.92	2	6	4	O=S(=O)(c1ccccc1)Nc1nnc(s1)S(=O)(=O)N	1	C304H97N79O67SZn+7	train	Zn
3dc3	refined	Protein-Ligand	1.7	Ki=4.9nM	Ki	8.31	2009	Carbonic anhydrase isozyme IX mimic(CA IX mimic)	AZM	P00918	C4H6N4O3S2	222.245	221.988	19	19	151.66	-1.23	1	2	5	3	CC(=O)Nc1nnc(s1)S(=O)(=O)N	1	C326H92N81O75S2Zn+4	train	Zn
3dcc	refined	Protein-Ligand	1.6	Ki=1.1nM	Ki	8.96	2009	Carbonic anhydrase isozyme IX mimic(CA IX mimic)	D9Z	P00918	C8H6ClN3O2S2	275.735	274.959	22	23	122.56	1.55	3.29	1	4	2	Clc1ccccc1c1nnc(s1)S(=O)(=O)N	1	C309H101N78O68SZn+6	train	Zn
3dcq	general	Protein-Ligand	1.8	IC50=5.94uM	IC50	5.23	2009	Fucose-binding lectin PA-IIL	2G0	Q9HYN5	C23H40N4O8	500.586	500.285	75	76	191.52	-1.26	-0.43	6	7	16	CC[C@@H](C(=O)N1CCC[C@H]1C(=O)N[C@H](C(=O)N)CC(C)C)NC(=O)C[C@@H]1O[C@@H](C)[C@H]([C@H]([C@@H]1O)O)O	1	C146H57Ca2N49O66+2	test	Ca
3dcs	general	Protein-Ligand	1.8	Ki=11.4nM	Ki	7.94	2009	Carbonic anhydrase isozyme IX mimic(CA IX mimic)	MZM	P00918	C5H9N4O3S2	237.28	237.012	23	23	143.7	-0.52	1.22	2	4	3	CC(=O)Nc1sc(nn1C)S(=O)(=O)N	1	C311H91N78O71SZn+4	train	Zn
3dcw	general	Protein-Ligand	1.5	Ki=1nM	Ki	9	2009	Carbonic anhydrase isozyme IX mimic(CA IX mimic)	EZL	P00918	C9H10N2O3S2	258.317	258.013	26	27	118.9	1.61	3.12	1	3	3	CCOc1ccc2c(c1)sc(n2)S(=O)(=O)N	1	C309H97N77O68SZn+7	train	Zn
3dd0	refined	Protein-Ligand	1.48	Ki=1nM	Ki	9	2009	Carbonic anhydrase II	EZL	P00918	C9H10N2O3S2	258.317	258.013	26	27	118.9	1.61	3.12	1	3	3	CCOc1ccc2c(c1)sc(n2)S(=O)(=O)N	1	C308H101N80O69SZn+6	train	Zn
3dd8	refined	Protein-Ligand	1.9	Ki=14nM	Ki	7.85	2008	Carbonic anhydrase 2	2C7	P00918	C16H21NO5S2	371.472	371.086	45	47	120.29	3.71	5.62	1	4	4	NS(=O)(=O)Oc1ccc2c(c1)S(=O)(=O)C(=C2)CC1CCCCCC1	1	C314H97N80O70SZn+5	train	Zn
3dda	general	Protein-Ligand	1.5	IC50=133uM	IC50	3.88	2008	Botulinum neurotoxin A	7-mer	P60880 P0DPI1	C29H59N12O8S	735.919	735.43	109	108	398.5	-3.1	-3.77	10	8	32	[NH3+]CCCC[C@@H](C(=O)N[C@H](C(=O)N)CCSC)NC(=O)[C@H]([C@H](O)C)NC(=O)[C@@H](NC(=O)[C@@H](NC(=O)[C@H](CCC(=O)N)[NH3+])CCC[NH+]=C(N)N)C	1	C388H129N95O115S2Zn+7	train	Zn
3ddb	general	Protein-Ligand	1.6	IC50=95uM	IC50	4.02	2008	Botulinum neurotoxin A	7-mer	P60880 P0DPI1	C30H64N14O7S	764.984	764.48	116	115	421.42	-1.04	-5.2	9	7	33	[NH3+]CCCC[C@@H](C(=O)N[C@H](C(=O)N)CCSC)NC(=O)[C@H]([C@H](O)C)NC(=O)[C@@H](NC(=O)[C@@H](NC(=O)[C@H](CCC[NH+]=C(N)N)[NH3+])CCC[NH+]=C(N)N)C	1	C495H148N114O134SZn+10	train	Zn
3ddf	refined	Protein-Ligand	1.2	Ki=22uM	Ki	4.66	2008	dGMII	GB6	Q24451	C13H19N2O4	267.301	267.134	38	39	106.4	-0.89	-2.17	5	4	8	OC[C@@H](c1ccccc1)[NH2+]C[C@H]1NC(=O)[C@@H]([C@@H]1O)O	1	C276H102N77O81SZn+7	train	Zn
3ddg	refined	Protein-Ligand	1.74	Ki=1uM	Ki	6	2008	dGMII	GB7	Q24451	C14H21N2O4	281.328	281.15	41	42	97.61	-0.71	-2.22	4	4	8	OC[C@@H](c1ccccc1)[NH2+]C[C@@H]1[C@@H](O)[C@H](C(=O)N1C)O	1	C296H110N80O86SZn+7	train	Zn
3dgl	general	Protein-Ligand	1.8	Kd=250nM	Kd	6.6	2009	ATP Binding Protein-DX	ATP		C10H19N5O13P3	510.205	510.019	50	52	329.38	-6.07	-2.36	3	12	9	O[C@@H]1[C@@H](COP(OP(OP(O)(O)O)(O)O)(O)O)O[C@H]([C@@H]1O)n1cnc2c1ncnc2N	1	C166H51N47O41S4Zn+6	train	Zn
3dgo	refined	Protein-Ligand	2.5	Kd=180nM	Kd	6.74	2009	ATP Binding Protein-DX(Y43F)	ATP		C10H19N5O13P3	510.205	510.019	50	52	329.38	-6.07	-2.36	3	12	9	O[C@@H]1[C@@H](COP(OP(OP(O)(O)O)(O)O)(O)O)O[C@H]([C@@H]1O)n1cnc2c1ncnc2N	1	C199H69N56O58S4Zn+7	train	Zn
3dng	general	Protein-Ligand	2	IC50=7.4nM	IC50	8.13	2009	Neutrophil collagenase,MMP-8 catalytic domain	AXA	P22894	C22H21N5O5S	467.498	467.126	54	58	184.51	0.73	2.77	4	4	6	NC(=O)C[C@@H]1CCCc2c1c1c(=O)[nH]c(nc1s2)C(=O)NCc1ccc2c(c1)NC(=O)CO2	1	C307H92N77O84SZn+5	test	Zn
3dnt	general	Protein-Ligand	1.66	Kd=18uM	Kd	4.74	2009	Escherichia coli persistence factor, Protein hipA	ATP	P23874	C10H19N5O13P3	510.205	510.019	50	52	329.38	-6.07	-2.36	3	12	9	O[C@@H]1[C@@H](COP(OP(OP(O)(O)O)(O)O)(O)O)O[C@H]([C@@H]1O)n1cnc2c1ncnc2N	1	C346H125Mg2N89O104SSe+7	valid	Mg
3dpf	general	Protein-Ligand	2.1	IC50=57nM	IC50	7.24	2009	Neutrophil collagenase,MMP-8 catalytic domain	AXB	P22894	C24H22N5O6S2	540.591	540.101	59	64	208.04	0.4	2.01	3	6	5	O=C1C(=N)[C@@H](C1=O)[N@@H+]1CCc2c(C1)cc(cc2)CNC(=O)c1nc2sc3c(c2c(=O)[nH]1)CCS(=O)(=O)C3	1	C303H95CaN74O86SZn+5	test	ZnCa
3ds9	general	Protein-Ligand	1.76	Ki=41nM	Ki	7.39	2008	Botulinum neurotoxin type A	8-mer	P0DPI1	C46H73N16O12S	1074.24	1073.53	148	150	503.97	2.01	0.55	12	12	38	CSCC[C@@H](C(=O)N[C@H](C(=O)N)CC(C)C)NC(=O)[C@@H](NC(=O)[C@H]([C@H](O)C)NC(=O)[C@H](Cc1c[nH]c2c1cccc2)NC(=O)[C@@H](NC(=O)[C@H](CCNc1ccc(cc1N(=O)=O)N(=O)=O)[NH3+])CCC[NH+]=C(N)N)CC[NH3+]	1	C520H159N135O146SZn+13	valid	Zn
3dst	general	Protein-Ligand	1.9	Kd=0.83nM	Kd	9.08	2008	RabGGTase	GRG	Q08602 Q08603	C20H38O7P2	452.459	452.209	67	66	146.79	4.18	5.48	0	5	13	C/C(=C\CC/C(=C/COP(OP(O)(O)O)(O)O)/C)/CC/C=C(/CCC=C(C)C)\C	1	C425H145N101O100S6Zn+6	train	Zn
3dsu	general	Protein-Ligand	1.9	Kd=94nM	Kd	7.03	2008	RabGGTase	FPP	Q08602 Q08603	C15H30O7P2	384.342	384.147	54	53	146.79	2.32	3.76	0	5	10	C/C(=C\COP(OP(O)(O)O)(O)O)/CC/C=C(/CCC=C(C)C)\C	1	C349H114N88O88S7Zn+6	valid	Zn
3dwb	general	Protein-Ligand	2.38	IC50=0.65uM	IC50	6.19	2008	Endothelin-converting enzyme 1(C428S)	RDF	P42892	C23H35N3O10P	544.512	544.206	72	74	227.42	0.65	0.57	6	8	14	CC(C[C@@H](C(=O)N[C@H](C(=O)O)Cc1c[nH]c2c1cccc2)NP(O[C@@H]1O[C@@H](C)[C@@H]([C@H]([C@H]1O)O)O)(O)O)C	1	C342H117N94O90S3Zn+7	train	Zn
3dx0	general	Protein-Ligand	1.7	Ki=36nM	Ki	7.44	2009	Alpha-mannosidase 2	MSN	Q24451	C6H14NO3S	180.245	180.069	25	25	113.63	-2.01	-2.58	4	3	4	CS[C@@H]1[C@@H]([NH3+])[C@H]([C@H]([C@H]1O)O)O	1	C254H91N62O77SZn+5	test	Zn
3dx1	refined	Protein-Ligand	1.21	Ki=265uM	Ki	3.58	2009	Alpha-mannosidase 2	YHO	Q24451	C5H12NO3	134.154	134.082	21	21	88.33	-2.37	-2.92	4	3	3	O[C@H]1C[C@H]([C@H]([C@H]1O)O)[NH3+]	1	C229H83N58O69SZn+4	test	Zn
3dx2	refined	Protein-Ligand	1.4	Ki=150nM	Ki	6.82	2009	Alpha-mannosidase 2	MZB	Q24451	C6H14NO4S	196.245	196.064	26	26	124.61	-3.05	-2.69	4	4	3	O[C@@H]1[C@H]([NH3+])[C@H]([C@@H]([C@@H]1O)O)[S@](=O)C	1	C254H91N62O77SZn+5	train	Zn
3dx3	refined	Protein-Ligand	1.42	Ki=300nM	Ki	6.52	2009	Alpha-mannosidase 2	YTB	Q24451	C5H12NO4	150.153	150.077	22	22	108.56	-3.35	-3.95	5	4	4	O[C@@H]1[C@H]([NH3+])[C@H]([C@@H]([C@@H]1O)O)O	1	C230H83N58O68SZn+5	test	Zn
3dx4	refined	Protein-Ligand	1.38	Ki=76nM	Ki	7.12	2009	Alpha-mannosidase 2	GOO	Q24451	C6H14NO4	164.18	164.092	25	25	97.56	-2.81	-3.29	4	3	4	CO[C@@H]1[C@@H]([NH3+])[C@H]([C@H]([C@H]1O)O)O	1	C240H86N60O72SZn+5	test	Zn
3dyo	refined	Protein-Ligand	1.8	Ki=5.0mM	Ki	2.3	2008	E. coli (lacZ) beta-galactosidase (H418N)	IPT	P00722	C9H18O5S	238.301	238.087	33	33	115.45	-0.46	-1.07	4	4	7	OC[C@H]1O[C@@H](SC(C)C)[C@@H]([C@H]([C@H]1O)O)O	1	C264H112MgN77O90S7+5	train	Mg
3e12	refined	Protein-Ligand	1.7	Kd=1.02uM	Kd	5.99	2009	2-dehydro-3-deoxyphosphooctonate aldolase	KD0	O66496	C8H16O11P	319.18	319.043	36	35	218.8	-3.92	-3.86	4	10	11	O[C@@H]([C@H]([C@@H]([C@@H](CC(=O)C(=O)O)O)O)O)COP(O)(O)O	1	C303H129CuN92O98S2+8	train	XX
3e37	general	Protein-Ligand	1.8	IC50=4.05uM	IC50	5.39	2009	Human Protein farnesyltransferase (FTase)	ED5	P49354 P49356	C32H42N6O4S	606.779	606.299	85	88	120.15	4.22	5.96	0	5	13	N#Cc1ccc(cc1)N(Cc1cncn1C)CCN(S(=O)(=O)c1ccccc1C)CC1CCN(CC1)C(=O)OC(C)(C)C	1	C433H138N114O120S5Zn+7	test	Zn
3e3u	general	Protein-Ligand	1.56	IC50=13nM	IC50	7.89	2009	peptide deformylase (PDF)	NVC	P9WIJ3	C19H25N3O4	359.42	359.185	51	53	86.88	2.58	3.72	1	4	10	CCCC[C@@H](C(=O)N1CCC[C@H]1c1nc2c(o1)cccc2)CN(C=O)O	1	C291H94N81NiO83S4+7	train	XX
3e4a	general	Protein-Ligand	2.6	Ki=1.7nM	Ki	8.77	2009	Human Insulin-degrading IDE enzyme	QIX	P14735	C25H35N8O6	543.595	543.268	74	75	245.73	0.42	-0.1	6	6	20	ONC(=O)C[C@H](C(=O)N[C@H](C(=O)NCC(=O)NCC(=O)N)CCC[NH+]=C(N)N)Cc1ccc2c(c1)cccc2	1	C435H133N113O117SZn+10	test	Zn
3e7b	general	Protein-Ligand	1.7	IC50=0.16nM	IC50	9.8	2008	Serine/threonine-protein phosphatase PP1-alpha catalytic subunit	E7B	P62136	C41H68O14	784.97	784.461	123	124	223.42	7.09	4.87	3	10	24	CO[C@H]([C@@H](C(C)C)OC(=O)C[C@H](/C(=C(/C(=O)O)\C)/C(=O)O)O)[C@@H](CC(=O)[C@H]([C@H](CC[C@H]([C@@H]1O[C@@]2(CC[C@@H]1C)CC[C@H]([C@@H](O2)CC[C@@H](C(=O)C)C)C)C)O)C)O	1	C209H81Mn2N67O68S2+7	train	Mn
3e81	general	Protein-Ligand	1.63	Ki=37mM	Ki	1.43	2008	Acylneuraminate cytidylyltransferase	SLB	Q8A712	C11H19NO9	309.27	309.106	40	40	176.78	-2.58	-3.48	6	8	10	OC[C@H]([C@H]([C@@H]1O[C@@](O)(C[C@@H]([C@H]1NC(=O)C)O)C(=O)O)O)O	1	C281H107MgN73O82S+8	valid	Mg
3e8n	general	Protein-Ligand	2.5	IC50=19nM	IC50	7.72	2009	human mitogen-activated protein kinase kinase 1 (MEK1)	VRA	Q02750	C19H20F3IN2O5S	572.337	572.009	51	53	116.27	2.78	4.71	4	4	11	OC[C@H](CC1(CC1)S(=O)(=O)Nc1c(OC)cc(c(c1Nc1ccc(cc1F)I)F)F)O	1	C320H109MgN82O89S7+6	train	Mg
3e8r	general	Protein-Ligand	1.9	Ki=0.18nM	Ki	9.74	2008	ADAM 17	615	P78536	C28H25N3O4	467.516	467.185	60	64	114.54	3.21	5.11	3	4	10	ONC(=O)[C@H]1C[C@]1(Cc1ccc(cc1)OCc1cc(nc2c1cccc2)c1ccccc1)C(=O)N	1	C310H96N84O98S3Zn+10	train	Zn
3e9h	general	Protein-Ligand	2.1	Ki=28nM	Ki	7.55	2009	Lysyl-tRNA synthetase from Bacillus stearothermophilus	KAA	Q9RHV9	C16H28N8O7S	476.508	476.18	60	62	255.44	-3.59	-2.52	6	8	13	[NH3+]CCCC[C@@H](C(=O)NS(=O)(=O)OC[C@H]1O[C@H]([C@@H]([C@@H]1O)O)n1cnc2c1ncnc2N)[NH3+]	1	C360H133MgN101O102S3+7	valid	Mg
3e9i	general	Protein-Ligand	2.2	Ki=0.6uM	Ki	6.22	2009	Lysyl-tRNA synthetase from Bacillus stearothermophilus	XAH	Q9RHV9	C16H30N8O8P	493.432	493.192	63	65	276.2	-4.33	-3.25	6	8	14	[NH3+]CCCC[C@@H](C(=O)NOP(OC[C@H]1O[C@H]([C@@H]([C@@H]1O)O)n1cnc2c1ncnc2N)(O)O)[NH3+]	1	C381H133MgN109O106S3+9	train	Mg
3ebh	refined	Protein-Ligand	1.65	Ki=478.2nM	Ki	6.32	2009	M1 family aminopeptidase	BES	O96935	C16H25N2O4	309.381	309.181	47	47	114.27	-0.08	0.21	3	4	9	O[C@@H]([C@@H](Cc1ccccc1)[NH3+])C(=O)N[C@H](C(=O)O)CC(C)C	1	C354H127MgN93O104S4Zn+6	valid	ZnMg
3ebi	refined	Protein-Ligand	2	Ki=79nM	Ki	7.1	2009	M1 family aminopeptidase	BEY	O96935	C19H26NO4P	363.388	363.16	51	52	118.99	0.75	1.96	1	4	8	OC(=O)[C@@H](CP([C@@H](CCc1ccccc1)[NH3+])(O)O)Cc1ccccc1	1	C384H144MgN103O118S4Zn+6	train	ZnMg
3ecn	general	Protein-Ligand	2.1	IC50=698uM	IC50	3.16	2008	PDE8A	IBM	O60658	C10H14N4O2	222.244	222.112	30	31	72.68	0.95	0.08	1	3	2	CC(Cn1c(=O)n(C)c(=O)c2c1nc[nH]2)C	1	C274H109MgN75O74S4Zn+6	train	ZnMg
3egt	refined	Protein-Ligand	2	Ki=1.26nM	Ki	8.9	2009	T. brucei Farnesyl Pypophosphate Synthase	722	Q86C09	C14H28NO7P2	384.322	384.134	52	52	161.67	-0.05	1.13	0	6	9	CCCCCCCOc1ccc[n+](c1)CC(P(O)(O)O)P(O)(O)O	1	C429H162Mg3N114O132S4+13	train	Mg
3ehx	refined	Protein-Ligand	1.9	Ki=25nM	Ki	7.6	2009	Macrophage metalloelastase	BDL	P39900	C18H21NO4S	347.429	347.119	45	46	91.85	4.71	4.6	1	4	6	CC(C[C@H](C(=O)O)NS(=O)(=O)c1ccc(cc1)c1ccccc1)C	1	C287H94CaN72O76SZn2+7	test	ZnCa
3ehy	refined	Protein-Ligand	1.9	Ki=1.4uM	Ki	5.85	2009	Macrophage metalloelastase	TBL	P39900	C10H13NO5S	259.279	259.051	30	30	101.08	1.74	1.92	1	4	4	COc1ccc(cc1)S(=O)(=O)N[C@@H](C(=O)O)C	1	C267H85CaN65O67SZn+5	valid	ZnCa
3ejp	refined	Protein-Ligand	1.32	Ki=2.8nM	Ki	8.55	2009	Golgi alpha-Mannosidase II	HN2	Q24451	C16H22NO4	292.35	292.155	43	45	82.2	0.12	0.34	4	4	6	O[C@@H]1C[N@@H+]2[C@@H]([C@@H]1O)[C@H](O)CC[C@@H]2CC(=O)c1ccccc1	1	C282H98N72O87SZn+6	valid	Zn
3ejq	refined	Protein-Ligand	1.45	Ki=2.7nM	Ki	8.57	2009	Golgi alpha-Mannosidase II	HN3	Q24451	C17H24NO4	306.377	306.171	46	48	82.2	0.48	0.65	4	4	6	Cc1ccc(cc1)C(=O)C[C@H]1CC[C@H]([C@H]2[N@H+]1C[C@H]([C@H]2O)O)O	1	C287H101N73O88SZn+6	train	Zn
3ejr	refined	Protein-Ligand	1.27	Ki=2.7nM	Ki	8.57	2009	Golgi alpha-Mannosidase II	HN4	Q24451	C20H30NO4	348.457	348.217	55	57	82.2	1.79	1.64	4	4	7	O[C@@H]1C[N@@H+]2[C@@H]([C@@H]1O)[C@H](O)CC[C@@H]2CC(=O)c1ccc(cc1)C(C)(C)C	1	C343H120N92O100S3Zn+7	train	Zn
3ejs	general	Protein-Ligand	1.35	IC50=250nM	IC50	6.6	2009	Golgi alpha-Mannosidase II	HN5	Q24451	C20H32NO3	334.473	334.238	56	58	65.13	2.79	2	4	3	7	O[C@@H]1C[N@@H+]2[C@@H]([C@@H]1O)[C@H](O)CC[C@@H]2CCc1ccc(cc1)C(C)(C)C	1	C305H108N83O91SZn+7	train	Zn
3ejt	general	Protein-Ligand	1.35	IC50=44nM	IC50	7.36	2009	Golgi alpha-Mannosidase II	HN6	Q24451	C20H32NO3	334.473	334.238	56	58	65.13	2.79	2	4	3	7	O[C@@H]1C[N@@H+]2[C@@H]([C@@H]1O)[C@H](O)CC[C@H]2CCc1ccc(cc1)C(C)(C)C	1	C291H104N76O88SZn+7	train	Zn
3eju	general	Protein-Ligand	1.32	IC50=250nM	IC50	6.6	2009	Golgi alpha-Mannosidase II	HN7	Q24451	C20H30NO4	348.457	348.217	55	57	82.2	1.79	1.64	4	4	7	O[C@@H]1C[N@@H+]2[C@@H]([C@@H]1O)[C@H](O)CC[C@H]2CC(=O)c1ccc(cc1)C(C)(C)C	1	C291H104N76O88SZn+7	valid	Zn
3elc	refined	Protein-Ligand	2.5	Kd=2.02mM	Kd	2.69	2009	2-C-methyl-D-erythritol 2,4-cyclodiphosphate synthase	F01	P62617	C9H12FN3O5	261.207	261.076	30	31	131.56	-1.9	-2.49	4	4	5	OC[C@H]1O[C@H]([C@@H]([C@@H]1O)O)n1cc(F)c(=N)[nH]c1=O	1	C223H87N58O71Zn+5	train	Zn
3elm	general	Protein-Ligand	1.9	Ki=0.19nM	Ki	9.72	2009	Collagenase 3, MMP-13	24F	P45452	C23H30N2O7S2	510.624	510.149	64	66	158.86	4.86	5.21	1	5	10	CCOc1ccc(cc1)c1ccc(s1)S(=O)(=O)N[C@H](C1CCN(CC1)C(=O)OC(C)C)C(=O)O	1	C331H99CaN73O87SZn2+6	valid	ZnCa
3eor	general	Protein-Ligand	2.9	Kd=40mM	Kd	1.4	2009	2-C-methyl-D-erythritol 2,4-cyclodiphosphate synthase	CFV	P62617	C8H15N3O6P	280.195	280.07	33	33	165.38	-3.36	-2.17	2	5	6	OC[C@@H](Cn1ccc(=N)[nH]c1=O)OCP(O)(O)O	1	C232H89N59O75Zn+5	valid	Zn
3eqb	general	Protein-Ligand	2.62	IC50=15mM	IC50	1.82	2008	human mitogen-activated protein kinase kinase 1 (MEK1)	LUG	Q02750	C16H14F3IN5O	476.215	476.02	40	42	90.62	3.28	3.3	3	2	6	[NH3+]CCNc1nnc(o1)c1ccc(c(c1Nc1ccc(cc1F)I)F)F	1	C248H94MgN68O71S4+7	valid	Mg
3esj	general	Protein-Ligand	2.7	Kd=0.925mM	Kd	3.03	2009	2-C-methyl-D-erythritol 2,4-cyclodiphosphate synthase	CC7	P62617	C9H13N3O7P	306.189	306.049	33	35	163.61	-2.95	-1.91	2	4	2	O[C@@H]1[C@@H]2OP(O)(O)OC[C@H]2O[C@H]1n1ccc(=N)[nH]c1=O	1	C246H95N65O75S2Zn+6	train	Zn
3eu5	general	Protein-Ligand	2.8	Kd=32nM	Kd	7.49	2009	Protein farnesyltransferase	GBO	Q02293 Q04631	C20H37N3O9P2S	557.535	557.173	72	73	242.32	-0.27	2.96	3	7	15	O=C(NC[C@@H](/C=C\C[C@@H](/C=C/OP(OP(O)(O)O)(O)O)C)C)CCCC[C@@H]1SC[C@H]2[C@@H]1NC(=O)N2	1	C418H135N108O111S7Zn+8	train	Zn
3ewc	refined	Protein-Ligand	2.11	Ki=20nM	Ki	7.7	2009	Adenosine deaminase	MCF	A5KE01	C12H18N4O4S	314.361	314.105	39	41	137.43	-2.26	-1.07	4	4	6	CSC[C@H]1O[C@H]([C@@H]([C@@H]1O)O)n1cnc2c1N=CNC[C@H]2O	1	C338H117N92O104S5Zn+6	valid	Zn
3ewj	refined	Protein-Ligand	1.8	Ki=143nM	Ki	6.84	2008	TNF-alpha convertase(TACE)	642	P78536	C29H24N2O4	464.512	464.174	59	64	88.52	5.25	5.46	1	4	5	OC(=O)[C@H]1C[C@]21C[C@H](NC2=O)c1ccc(cc1)OCc1cc(nc2c1cccc2)c1ccccc1	1	C320H109N84O95S4Zn+10	train	Zn
3exe	refined	Protein-Ligand	1.98	Kd=0.11uM	Kd	6.96	2008	wt human pyruvate dehydrogenase (E1p) component	TPP	P08559 P11177	C12H22N4O7P2S	428.338	428.068	48	49	227.13	-1.64	1.36	1	7	7	Cc1ncc(c(n1)N)CN1CSC(=C1C)CCOP(OP(O)(O)O)(O)O	1	C395H139MnN106O120S8+4	train	Mn
3exf	general	Protein-Ligand	3	Kd=0.29uM	Kd	6.54	2008	human pyruvate dehydrogenase (S-E1p) component	TPP	P08559 P11177	C12H21N4O7P2S	427.33	427.061	47	48	231.76	-1.41	1.34	1	7	7	Cc1ncc(c(n1)N)Cn1csc(c1C)CCOP(OP(O)(O)O)(O)O	1	C397H139MgN111O124S7+4	valid	Mg
3exh	refined	Protein-Ligand	2.44	Kd=13.1uM	Kd	4.88	2008	human pyruvate dehydrogenase (phospho-S1-E1p) component	TPP	P08559 P11177	C12H21N4O7P2S	427.33	427.061	47	48	231.76	-1.41	1.34	1	7	7	Cc1ncc(c(n1)N)Cn1csc(c1C)CCOP(OP(O)(O)O)(O)O	1	C362H125MnN106O112S8+5	train	Mn
3f0r	general	Protein-Ligand	2.54	Ki=130nM	Ki	6.89	2008	Human HDAC8	TSN	Q9BY41	C17H22N2O3	302.368	302.163	44	44	69.64	2.75	2.97	2	3	8	ONC(=O)/C=C/C(=C/[C@H](C(=O)c1ccc(cc1)N(C)C)C)/C	1	C251H82N68O76S4Zn+4	train	Zn
3f15	refined	Protein-Ligand	1.7	Kd=7.88nM	Kd	8.1	2008	matrix metalloproteinase 12 (MMP12)	HS1	P39900	C12H18N2O7S	334.346	334.083	40	40	144.78	-1.41	0.02	4	6	12	OC[C@H](CN(S(=O)(=O)c1ccc(cc1)OC)CC(=O)NO)O	1	C269H87CaN63O67SZn+5	train	ZnCa
3f16	refined	Protein-Ligand	1.16	Kd=5.91nM	Kd	8.23	2008	matrix metalloproteinase 12 (MMP12)	HS3	P39900	C10H14N2O6S	290.293	290.057	33	33	133.34	-0.94	0.7	4	5	9	OC[C@H](C(=O)NO)NS(=O)(=O)c1ccc(cc1)OC	1	C267H89CaN64O66SZn+5	train	ZnCa
3f17	refined	Protein-Ligand	1.1	Kd=2.36nM	Kd	8.63	2008	matrix metalloproteinase 12 (MMP12)	HS4	P39900	C14H12N2O4S	304.321	304.052	33	34	101.05	1.84	3.4	1	4	5	O=NC(=O)CNS(=O)(=O)c1ccc(cc1)c1ccccc1	1	C272H91CaN66O70SZn+6	train	ZnCa
3f18	refined	Protein-Ligand	1.13	Kd=39.5nM	Kd	7.4	2008	matrix metalloproteinase 12 (MMP12)	HS5	P39900	C10H13FN2O5S	292.284	292.053	32	32	115.32	-0.66	0.79	3	5	9	OCCN(S(=O)(=O)c1ccc(cc1)F)CC(=O)NO	1	C232H72CaN58O58SZn+5	train	ZnCa
3f19	refined	Protein-Ligand	1.13	Kd=65.1nM	Kd	7.19	2008	matrix metalloproteinase 12 (MMP12)	HS6	P39900	C8H9FN2O4S	248.231	248.027	25	25	103.88	-0.16	1.47	3	4	6	ONC(=O)CNS(=O)(=O)c1ccc(cc1)F	1	C243H77CaN60O61SZn+6	train	ZnCa
3f1a	refined	Protein-Ligand	1.25	Kd=61.1nM	Kd	7.21	2008	matrix metalloproteinase 12 (MMP12)	HS7	P39900	C8H10N2O4S	230.241	230.036	25	25	103.88	-0.26	1.33	3	4	6	ONC(=O)CNS(=O)(=O)c1ccccc1	1	C218H72CaN56O56SZn+6	train	ZnCa
3f2a	general	Protein-Ligand	1.9	IC50=57nM	IC50	7.24	2009	Proto-oncogene serine/threonine-protein kinase Pim-1	985	P11309	C19H23N4O2	339.412	339.182	48	50	70.76	1.04	2.6	1	4	3	OC(=O)/C=C/c1cccc(c1)c1cncc(n1)N1CCC[N@@H+](CC1)C	1	C296H89MgN72O80+6	train	Mg
3f6e	refined	Protein-Ligand	1.34	Kd=4.14mM	Kd	2.38	2008	Benzoylformate decarboxylase	8PA	P20906	C20H28N5O8P2S	560.478	560.113	64	66	264.88	-0.99	2.48	2	9	11	Cc1ncc(c(n1)N)Cn1c(sc(c1C)CCOP(OP(O)(O)O)(O)O)[C@H](/C=C/c1cccnc1)O	1	C483H161MgN128O146S4+4	valid	Mg
3f7b	general	Protein-Ligand	2.05	IC50=64nM	IC50	7.19	2009	soluble domain of Carbonic anhydrase 4	AG5	P22748	C20H19N3O3S2	413.513	413.087	47	49	135.83	3.05	5.02	2	4	8	O=C(c1cc(cnc1Sc1ccccc1)S(=O)(=O)N)NCCc1ccccc1	1	C298H108N83O81S4Zn+9	train	Zn
3f7u	general	Protein-Ligand	2	IC50=246nM	IC50	6.61	2009	soluble domain of Carbonic anhydrase 4	AG4	P22748	C16H19N3O4S2	381.47	381.082	44	45	145.06	1.31	3.82	2	4	9	COCCCNC(=O)c1cc(cnc1Sc1ccccc1)S(=O)(=O)N	1	C319H100N88O84S5Zn+9	train	Zn
3f80	refined	Protein-Ligand	1.6	Kd=60uM	Kd	4.22	2008	Arginase-1	6HN	P05089	C6H13N2O4	177.178	177.088	25	24	110.76	-1.61	-0.35	1	4	4	O=N(=O)CCCC[C@@H](C(=O)O)[NH3+]	1	C219H84Mn2N62O80S+	train	Mn
3f8e	refined	Protein-Ligand	2	Ki=59nM	Ki	7.23	2009	Carbonic anhydrase 2	TE1	P00918	C15H22O5	282.332	282.147	42	42	86.99	3.58	2.5	2	4	8	COc1cc(O)c(cc1[C@H](CC(C)C)O)CCC(=O)O	1	C293H89HgN76O60SZn+6	test	Zn
3fa3	general	Protein-Ligand	2.6	Ki=2.5uM	Ki	5.6	2009	2,3-dimethylmalate lyase	OAF	Q2L887	C4H4F2O6	186.068	185.998	16	15	115.06	0.41	-1.53	2	6	3	OC(=O)C(C(C(=O)O)(O)O)(F)F	1	C260H100MnN68O75S4+4	valid	Mn
3fcq	refined	Protein-Ligand	1.75	Ki=1.7mM	Ki	2.77	2009	Thermolysin	M3S	P00800	C10H10O4	194.184	194.058	24	24	63.6	2.65	1.62	0	3	2	CC(=O)Oc1c(C)cccc1C(=O)O	1	C215H81N55O64SZn+3	train	Zn
3fed	refined	Protein-Ligand	1.29	Ki=34.6nM	Ki	7.46	2009	Glutamate carboxypeptidase III	BIX	Q9Y3Q0	C10H20NO8P	313.241	313.093	40	39	193.59	-1.51	-1.53	1	8	7	OC(=O)CC[C@@H](C(=O)O)CP(CC[C@@H](C(=O)O)[NH3+])(O)O	1	C342H125N96O105Zn2+10	test	Zn
3fee	refined	Protein-Ligand	1.56	Ki=230nM	Ki	6.64	2009	Glutamate carboxypeptidase III	QUS	Q9Y3Q0	C5H8N3O5	190.134	190.046	21	21	132.94	-3	-3.18	2	4	2	OC(=O)[C@H](Cn1oc(=O)[nH]c1=O)[NH3+]	1	C240H94N73O79Zn2+9	train	Zn
3feg	general	Protein-Ligand	1.3	Kd=45uM	Kd	4.35	2008	Delta N human choline kinase beta	HC7	Q9Y259	C24H36N2O7P	495.526	495.226	70	72	130.04	0.12	1.49	1	5	9	O=C(c1ccc(cc1)c1ccc(cc1)[C@]1(O)OCC[N+](C1)(C)C)C[N+](CCOP(O)(O)O)(C)C	1	C321H104MgN78O88S+6	train	Mg
3ff3	refined	Protein-Ligand	1.37	Ki=270uM	Ki	3.57	2009	Glutamate carboxypeptidase III	GLU	Q9Y3Q0	C5H10NO4	148.137	148.061	20	19	102.24	-1.18	-1.45	1	4	2	OC(=O)CC[C@@H](C(=O)O)[NH3+]	1	C231H94N72O77Zn2+10	valid	Zn
3ffp	refined	Protein-Ligand	1.81	Ki=72.5nM	Ki	7.14	2009	Carbonic anhydrase 2	LC1	P00918	C10H8N4O2S2	280.326	280.009	26	28	138.35	0.78	3.11	2	4	2	NS(=O)(=O)c1ccc2c(c1)nc([nH]2)c1cscn1	1	C303H97N80O69SZn+6	train	Zn
3ffu	general	Protein-Ligand	2.8	Kd=0.36uM	Kd	6.44	2009	RNA Probable pyrophosphohydrolase	GTP	Q6MPX4	C10H20N5O14P3	527.212	527.022	52	54	350.6	-5.61	-3.65	2	11	9	O[C@@H]1[C@@H](COP(OP(OP(O)(O)O)(O)O)(O)O)O[C@H]([C@@H]1O)n1cnc2c1[nH]c(N)[nH+]c2=O	1	C281H104Mg3N74O74S+6	train	Mg
3fh5	general	Protein-Ligand	1.63	IC50=87nM	IC50	7.06	2010	Leukotriene A-4 hydrolase	24P	P09960	C18H22NO	268.373	268.17	42	44	25.84	3.94	3.95	1	0	5	c1ccc(cc1)Cc1ccc(cc1)OC[C@@H]1[NH2+]CCC1	1	C367H122N92O98S4Zn+7	train	Zn
3fh7	refined	Protein-Ligand	2.05	Kd=25nM	Kd	7.6	2010	Leukotriene A-4 hydrolase	25P	P09960	C21H25ClNO4	390.881	390.147	52	54	60.2	3.66	4.99	1	2	8	OC(=O)CCC[N@H+]1CCC[C@H]1COc1ccc(cc1)Oc1ccc(cc1)Cl	1	C399H136N98O109S4Zn+7	train	Zn
3fh8	general	Protein-Ligand	1.67	IC50=180nM	IC50	6.74	2010	Leukotriene A-4 hydrolase	27P	P09960	C19H24NO	282.4	282.186	45	47	13.67	4.34	3.9	1	0	6	c1ccc(cc1)Cc1ccc(cc1)OCC[NH+]1CCCC1	1	C384H125N95O99S4Zn+8	train	Zn
3fhe	general	Protein-Ligand	2.16	IC50=2.5nM	IC50	8.6	2010	Leukotriene A-4 hydrolase	28P	P09960	C20H26NO3	328.425	328.191	50	51	50.97	2.87	2.04	1	2	9	OC(=O)CC[N@H+](CCCOc1ccc(cc1)Cc1ccccc1)C	1	C395H134N95O107S4Zn+7	train	Zn
3fmq	general	Protein-Ligand	2.5	IC50=11.1nM	IC50	7.95	2009	Methionine aminopeptidase 2	FUG	Q8SR45	C19H30O5	338.439	338.209	54	55	68.29	2.91	2.77	1	2	8	C=CC(=O)O[C@@H]1CC[C@@]([C@H]([C@@H]1OC)[C@@]1(C)O[C@@H]1CC=C(C)C)(C)O	1	C335H116Fe2N86O93S2+6	train	Fe
3fmr	general	Protein-Ligand	2.89	IC50=10.6nM	IC50	7.97	2009	Methionine aminopeptidase 2	TN4	Q8SR45	C18H29NO5	339.427	339.205	53	54	80.65	3.91	2.88	1	2	8	CO[C@@H]1[C@@H](CC[C@@]([C@H]1[C@@]1(C)O[C@@H]1CC=C(C)C)(C)O)OC(=O)N=C	1	C332H117Fe2N88O91S+7	test	Fe
3frg	general	Protein-Ligand	1.7	IC50=3.98nM	IC50	8.4	2010	Catalytic Domain of Human Phosphodiesterase 4B2B	SK4	Q07343	C18H17N3O4S	371.41	371.094	43	45	119.76	2.37	4.34	2	4	5	COc1cccc(c1)Nc1c(cnc2c1cc(cc2)S(=O)(=O)C)C(=O)N	1	C351H118MgN92O95S6Zn+7	train	ZnMg
3ftq	general	Protein-Ligand	2.9	Kd=4.7uM	Kd	5.33	2009	Septin-2 residues 33-306	GNP	P42208	C10H21N6O13P3	526.227	526.038	53	55	353.4	-5.89	-3.69	3	11	9	O[C@@H]1[C@@H](COP(OP(NP(O)(O)O)(O)O)(O)O)O[C@H]([C@@H]1O)n1cnc2c1[nH]c(N)[nH+]c2=O	1	C236H82MgN67O77S+7	train	Mg
3fts	general	Protein-Ligand	2.33	IC50=212uM	IC50	3.67	2009	Leukotriene A-4 hydrolase	STL	P09960	C14H12O3	228.243	228.079	29	30	60.69	3.13	2.97	3	3	5	Oc1ccc(cc1)/C=C/c1cc(O)cc(c1)O	1	C320H111N79O84S4Zn+5	valid	Zn
3ftu	general	Protein-Ligand	1.9	IC50=247uM	IC50	3.61	2009	Leukotriene A-4 hydrolase	RE2	P09960	C14H14O3	230.259	230.094	31	32	60.69	3.07	2.59	3	3	6	Oc1ccc(cc1)CCc1cc(O)cc(c1)O	1	C319H110N79O84S5Zn+6	train	Zn
3ftv	general	Protein-Ligand	1.7	IC50=1167uM	IC50	2.93	2009	Leukotriene A-4 hydrolase	11X	P09960	C12H12N2	184.237	184.1	26	27	24.92	2.33	2.77	1	1	3	c1ccc(cc1)NCc1cccnc1	1	C294H98N70O77S5Zn+5	train	Zn
3ftw	general	Protein-Ligand	1.85	IC50=1.67mM	IC50	2.78	2009	Leukotriene A4 hydrolase	11X	P09960	C12H12N2	184.237	184.1	26	27	24.92	2.33	2.77	1	1	3	c1ccc(cc1)NCc1cccnc1	1	C297H100N71O79S5Zn+5	valid	Zn
3fu0	general	Protein-Ligand	1.8	IC50=5308uM	IC50	2.28	2009	Leukotriene A-4 hydrolase	22F	P09960	C12H8FNO	201.196	201.059	23	24	29.96	2.29	2.45	0	2	2	Fc1ccc(cc1)C(=O)c1ccncc1	1	C288H94N68O76S5Zn+4	train	Zn
3fu5	general	Protein-Ligand	2.3	IC50=75.2uM	IC50	4.12	2009	Leukotriene A-4 hydrolase	492	P09960	C9H10NS2	196.312	196.025	22	23	84.12	1.87	2.22	1	0	2	[NH3+]Cc1ccc(s1)c1cccs1	1	C274H105N70O78S5Zn+4	train	Zn
3fui	general	Protein-Ligand	2.2	IC50=0.157uM	IC50	6.8	2009	Leukotriene A-4 hydrolase	812	P09960	C18H23N2O	283.388	283.181	44	46	37.87	3.5	4.05	2	0	6	C1CC[C@@H]([NH2+]1)COc1ccc(cc1)NCc1ccccc1	1	C378H126N92O100S5Zn+7	train	Zn
3fuk	general	Protein-Ligand	1.95	IC50=966uM	IC50	3.02	2009	Leukotriene A-4 hydrolase	58Z	P09960	C16H21N2O3	289.35	289.155	42	44	66.76	1	2.5	2	2	4	OC(=O)[C@@H]1CC[N@@H+](CC1)CCOc1ccc2c(c1)cc[nH]2	1	C338H117N84O95S3Zn+7	train	Zn
3ful	general	Protein-Ligand	2.39	IC50=199uM	IC50	3.7	2010	Leukotriene A-4 hydrolase	52D	P09960	C18H21N2O2	297.372	297.16	43	45	43.63	2.69	2.94	1	2	6	O=C(c1ccncc1)c1ccc(cc1)OCC[NH+]1CCCC1	1	C371H121N93O100S5Zn+6	train	Zn
3fum	general	Protein-Ligand	2.15	IC50=170uM	IC50	3.77	2009	Leukotriene A-4 hydrolase	80A	P09960	C18H23N2O2	299.387	299.176	45	47	46.79	2.16	2.79	2	2	7	O[C@@H](c1ccncc1)c1ccc(cc1)OCC[NH+]1CCCC1	1	C365H122N92O99S5Zn+7	train	Zn
3fun	general	Protein-Ligand	1.58	IC50=0.189uM	IC50	6.72	2009	Leukotriene A-4 hydrolase	798	P09960	C22H22NO2S	364.481	364.137	48	51	71.15	4.67	5.32	1	1	6	O=C(c1ccc(cc1)c1cscc1)c1ccc(cc1)OC[C@H]1CCC[NH2+]1	1	C410H133N102O110S5Zn+7	train	Zn
3fvl	refined	Protein-Ligand	1.85	Ki=0.86uM	Ki	6.07	2010	Carboxypeptidase A	BHK	P00730	C12H14O4	222.237	222.089	30	30	74.6	1.92	0.88	1	4	6	OCC(=O)C[C@H](C(=O)O)Cc1ccccc1	1	C293H100N76O85Zn+4	valid	Zn
3fw3	general	Protein-Ligand	1.72	IC50=43nM	IC50	7.37	2009	soluble domain of Carbonic anhydrase 4	ETS	P22748	C10H17N2O4S3	325.448	325.035	36	37	155.91	0.41	2.45	2	4	3	CC[NH2+][C@H]1C[C@H](C)S(=O)(=O)c2c1cc(s2)S(=O)(=O)N	1	C272H91N76O68S5Zn+8	test	Zn
3fx6	refined	Protein-Ligand	1.85	Ki=0.16uM	Ki	6.8	2009	Carboxypeptidase A1	BPX	P00730	C12H15NO6	269.251	269.09	34	34	123.58	1.69	0.8	2	6	7	O=N(=O)CC(C[C@H](C(=O)O)Cc1ccccc1)(O)O	1	C310H96N79O89Zn+4	train	Zn
3fzn	refined	Protein-Ligand	1.62	Kd=97uM	Kd	4.01	2009	Benzoylformate decarboxylase, BFDC	D7K	P20906	C20H32N4O11P3S	629.475	629.1	71	73	310.64	-2.18	1.97	2	10	12	COP([C@]([C@H]1SC(=C(N1Cc1cnc(nc1N)C)C)CCOP(OP(O)(O)O)(O)O)(c1ccccc1)O)(O)O	1	C437H151MgN115O137S2+3	valid	Mg
3g15	general	Protein-Ligand	1.7	Kd=0.10uM	Kd	7	2009	Delta N human choline kinase alpha	HC6	P35790	C24H34N2O4	414.538	414.252	64	67	58.92	1.04	1.77	2	2	5	O[C@]1(OCC[N+](C1)(C)C)c1ccc(cc1)c1ccc(cc1)[C@]1(O)OCC[N+](C1)(C)C	1	C304H100Mg2N75O88S2+4	test	Mg
3g3n	general	Protein-Ligand	2.4	IC50=0.51uM	IC50	6.29	2009	PDE7A catalytic domain	TC8	Q13946	C15H10F2N2OS	304.315	304.048	31	33	60.19	3.58	3.39	0	1	2	CSc1nc2ccccc2c(=O)n1c1c(F)cccc1F	1	C304H111MgN80O84S3Zn+5	test	ZnMg
3g3r	refined	Protein-Ligand	2	Kd=0.33uM	Kd	6.48	2009	eukaryotic polyphosphate polymerase, Vtc4p	ANP	P47075	H9NO9P3	259.994	259.949	22	21	223.87	-4.97	-2.05	1	8	2	OP(NP(OP(O)(O)O)(O)O)(O)O	1	C254H106MnN78O60S+13	train	Mn
3g42	general	Protein-Ligand	2.1	IC50=0.14uM	IC50	6.85	2009	TNF-alpha converting enzyme (TACE)	792	P78536	C21H20N2O5S	412.459	412.109	49	51	116.87	3.93	3.93	2	4	8	C#CCOc1ccc(cc1)S(=O)(=O)N[C@@H](C(=O)O)Cc1c[nH]c2c1cc(C)cc2	1	C317H96N77O90S4Zn+7	train	Zn
3g45	general	Protein-Ligand	2.63	IC50=4.4nM	IC50	8.36	2010	human phosphodiesterase 4b	988	Q07343	C21H15N3O2	341.363	341.116	41	44	71.6	4.5	5.32	0	4	3	O=N(=O)c1cccc(c1)c1cc(Cc2ccncc2)cc2c1nccc2	1	C390H139MgN102O114S4Zn+9	test	ZnMg
3g4f	general	Protein-Ligand	2.65	IC50=30uM	IC50	4.52	2009	(+)-delta-cadinene synthase isozyme XC1	FPF	Q39761	C15H29FO7P2	402.332	402.137	54	53	146.79	2.21	4.05	0	5	10	C/C(=C(\COP(OP(O)(O)O)(O)O)/F)/CC/C=C(/CCC=C(C)C)\C	1	C367H136Mg3N91O109S8+7	train	Mg
3g4g	general	Protein-Ligand	2.3	IC50=0.91nM	IC50	9.04	2010	human phosphodiesterase 4d	D71	Q08499	C19H13N5O4	375.338	375.097	41	44	115.6	1.88	2.42	0	6	3	O=N(=O)c1cccc(c1)n1c(=O)n(Cc2ccncc2)c(=O)c2c1nccc2	1	C395H132MgN101O116S5Zn+9	train	ZnMg
3g4i	general	Protein-Ligand	1.9	IC50=0.91nM	IC50	9.04	2010	human phosphodiesterase 4d	D71	Q08499	C19H13N5O4	375.338	375.097	41	44	115.6	1.88	2.42	0	6	3	O=N(=O)c1cccc(c1)n1c(=O)n(Cc2ccncc2)c(=O)c2c1nccc2	1	C368H126MgN100O102S5Zn+8	test	ZnMg
3g4k	general	Protein-Ligand	1.95	IC50=288nM	IC50	6.54	2010	human phosphodiesterase 4d	ROL	Q08499	C16H21NO3	275.343	275.152	41	43	47.56	2.21	2.95	1	1	4	COc1ccc(cc1OC1CCCC1)[C@@H]1CNC(=O)C1	1	C344H115MgN91O94S5Zn+8	valid	ZnMg
3g4l	general	Protein-Ligand	2.5	IC50=5.8nM	IC50	8.24	2010	human phosphodiesterase 4d	ROF	Q08499	C17H14Cl2F2N2O3	403.207	402.035	40	42	60.45	4.58	5.1	1	2	8	FC(Oc1ccc(cc1OCC1CC1)C(=O)Nc1c(Cl)cncc1Cl)F	1	C368H123MgN99O104S5Zn+9	train	ZnMg
3g58	general	Protein-Ligand	2.05	IC50=0.52nM	IC50	9.28	2010	human phosphodiesterase 4d	988	Q08499	C21H15N3O2	341.363	341.116	41	44	71.6	4.5	5.32	0	4	3	O=N(=O)c1cccc(c1)c1cc(Cc2ccncc2)cc2c1nccc2	1	C308H111MgN83O93S6Zn+6	train	ZnMg
3g5k	refined	Protein-Ligand	1.7	Ki=0.3nM	Ki	9.52	2009	human mitochondrial peptide deformylase	BB2	Q9HBH1	C19H35N3O5	385.498	385.258	62	62	118.97	1.55	1.92	4	5	16	CCCCC[C@@H](C(=O)N[C@H](C(=O)N1CCC[C@H]1CO)C(C)C)CC(=O)NO	1	C350H110CoN100O90S9+9	train	XX
3g7l	general	Protein-Ligand	2.2	Kd=0.19uM	Kd	6.72	2009	Chromo domain-containing protein 1, Chp1	16-mer	P09988 Q10103	C36H73N13O11	864.045	863.555	133	132	416.74	-5.04	-4.88	11	11	38	[NH3+]CCCC[C@@H](C(=O)N[C@H](C(=O)N[C@H](C(=O)N[C@H](C(=O)N[C@H](C(=O)N[C@H](C(=O)N[C@H](C(=O)O)CO)CCCC[N+](C)(C)C)CCC[NH+]=C(N)N)C)[C@H](O)C)CCC(=O)N)[NH3+]	1	C212H66N47O65Zn3+3	train	Zn
3gwt	general	Protein-Ligand	1.75	IC50=7.94pM	IC50	11.1	2010	Catalytic domain of human phosphodiesterase 4B2B	066	Q07343	C27H26N4O5S	518.584	518.162	63	66	140.07	3.75	5.78	2	5	8	COc1cccc(c1)Nc1c(cnc2c1cc(cc2C)S(=O)(=O)c1cccc(c1)C(=O)N(C)C)C(=O)N	1	C397H129MgN105O114S6Zn+8	train	ZnMg
3h9f	general	Protein-Ligand	2.6	Kd=12nM	Kd	7.92	2009	Human Dual Specificity Protein Kinase (TTK)	92M	P33981	C25H34N6O3	466.576	466.269	68	72	94.06	2.83	3.57	2	4	6	COc1cc(ccc1Nc1ncc2c(n1)N(CCC(=O)N2C)C1CCCC1)N1CCC(CC1)O	1	C357H145Mg2N88O113P5S4+8	valid	Mg
3hc8	general	Protein-Ligand	1.79	IC50=2.9nM	IC50	8.54	2009	Phosphodiesterase type 5 (PDE5)	PD4	O76074 Q07343	C24H33N6O4	469.557	469.256	67	70	108.06	1.31	1.61	2	3	10	CCCOCCn1c2nc(ccc2[nH]/c(=N\CC[NH+]2CCOCC2)/c1=O)c1ccc(nc1)OC	1	C421H139MgN112O114S5Zn+10	train	ZnMg
3hdz	general	Protein-Ligand	1.8	IC50=51nM	IC50	7.29	2009	Phosphodiesterase type 5 (PDE5)	PD6	O76074 Q07343	C18H21N3O	295.379	295.168	43	45	62.38	3.82	4.5	2	2	5	CCCCN1CC=C(c2c1cc(nc2N)c1ccccc1)O	1	C339H122MgN88O96S4Zn+6	train	ZnMg
3hf6	general	Protein-Ligand	1.8	IC50=0.026uM	IC50	7.59	2009	human tryptophan hydroxylase type 1	LX0	P17752	C24H25N6O2	429.494	429.204	57	60	141.66	2.3	3.34	3	5	6	Nc1nc(N[C@@H](c2ccc3c(c2)cccc3)C)nc(n1)c1ccc(cc1)C[C@@H](C(=O)O)[NH3+]	1	C322H101FeN79O88S4+5	train	Fe
3hf8	refined	Protein-Ligand	1.85	Ki=0.31uM	Ki	6.51	2010	human tryoptophan hydroxylase type 1	ML0	P17752	C27H23F4N4O3	527.49	527.171	61	64	125.97	3.74	5.03	2	4	7	Nc1nc(cc(n1)c1ccc(cc1)C[C@@H](C(=O)O)[NH3+])O[C@@H](C(F)(F)F)c1ccc(cc1)c1cccc(c1)F	1	C366H118FeN85O99S4+6	train	Fe
3hfb	refined	Protein-Ligand	1.92	Ki=0.03uM	Ki	7.52	2010	human tryoptophan hydroxylase type 1	ML4	P17752	C27H27N4O2	439.529	439.213	60	63	102.75	2.8	4.04	2	4	7	[NH3+][C@H](C(=O)O)Cc1ccc(cc1)c1ncc(nc1)NCc1ccccc1c1ccccc1C	1	C394H122FeN92O108S4+6	valid	Fe
3hii	general	Protein-Ligand	2.15	Ki=290nM	Ki	6.54	2009	human diamine oxidase	PNT	P19801	C19H26N4O2	342.435	342.206	51	52	121.68	6.21	0.64	0	0	10	NC(=[NH2+])c1ccc(cc1)OCCCCCOc1ccc(cc1)C(=[NH2+])N	1	C419H132CuN96O112+7	train	XX
3hkn	refined	Protein-Ligand	1.8	Ki=4.51uM	Ki	5.35	2009	Human carbonic anhydrase II	MFS	P00918	C26H37NO19S	699.632	699.168	84	85	280.33	-1.88	-0.32	1	9	19	CC(=O)OC[C@H]1O[C@H]([C@@H]([C@H]([C@@H]1O[C@@H]1O[C@H](COC(=O)C)[C@@H]([C@@H]([C@H]1OC(=O)C)OC(=O)C)OC(=O)C)OC(=O)C)OC(=O)C)S(=O)(=O)N	1	C406H117N108O93S2Zn+9	valid	Zn
3hkq	refined	Protein-Ligand	1.7	Ki=4.55uM	Ki	5.34	2009	Human carbonic anhydrase Isozymes II	1SD	P00918	C6H13NO7S	243.235	243.041	28	28	158.69	-2.65	-2.14	5	6	6	OC[C@H]1O[C@H]([C@@H]([C@H]([C@H]1O)O)O)S(=O)(=O)N	1	C315H92N79O70S2Zn+4	test	Zn
3hkt	refined	Protein-Ligand	2.36	Ki=4.1uM	Ki	5.39	2009	Human carbonic anhydrase isozyme II	2SD	P00918	C12H23NO12S	405.376	405.094	49	50	237.84	-4.8	-4.32	8	9	12	OC[C@H]1O[C@H]([C@@H]([C@H]([C@H]1O[C@H]1O[C@H](CO)[C@@H]([C@@H]([C@H]1O)O)O)O)O)S(=O)(=O)N	1	C312H91N80O68SZn+5	test	Zn
3hku	refined	Protein-Ligand	1.8	Ki=5nM	Ki	8.3	2009	Human carbonic anhydrase isozyme II	TOR	P00918	C12H21NO8S	339.362	339.099	43	45	123.92	-0.83	1.39	1	2	3	NS(=O)(=O)OC[C@]12OC[C@@H]3[C@H]([C@@H]2OC(O1)(C)C)OC(O3)(C)C	1	C342H101N86O74S2Zn+6	test	Zn
3hmv	general	Protein-Ligand	2.23	IC50=50.12nM	IC50	7.3	2010	cAMP-specific 3	HBT	Q07343	C17H17N3O4S	359.4	359.094	42	44	146.25	3.69	4.43	2	4	4	C[C@H]1CCc2c(C1)sc(c2C(=O)N)NC(=O)c1ccccc1N(=O)=O	1	C371H131MgN100O104S5Zn+10	train	ZnMg
3hqr	general	Protein-Ligand	2	Kd=3uM	Kd	5.52	2009	human PHD2 and HIF1-alpha peptide	OGA	Q9GZT9 Q16665	C4H5NO5	147.086	147.017	15	14	103.7	0.63	-1.34	1	5	2	OC(=O)CNC(=O)C(=O)O	1	C272H94MnN71O69S3+6	test	Mn
3hqw	general	Protein-Ligand	1.7	IC50=35nM	IC50	7.46	2009	cAMP and cAMP-inhibited cGMP 3,5-cyclic phosphodiesterase 10A	PF4	Q9QYJ6	C21H18N2O2S	362.445	362.109	44	47	75.38	4.71	5.49	1	1	5	COc1ccc(cc1)c1[nH]c(nc1c1ccc(cc1)OC)c1cccs1	1	C351H115MgN84O96S6Zn+4	train	ZnMg
3hqy	general	Protein-Ligand	2	IC50=11.5nM	IC50	7.94	2009	cAMP and cAMP-inhibited cGMP 3,5-cyclic phosphodiesterase 10A	PF6	Q9QYJ6	C25H20N4O	392.453	392.164	50	54	63.69	4.5	5.19	1	3	6	n1ccc(cc1)Cc1c[nH]nc1c1ccc(cc1)OCc1ccc2c(n1)cccc2	1	C370H134MgN87O104S6Zn+4	train	ZnMg
3hqz	general	Protein-Ligand	1.7	IC50=0.42nM	IC50	9.38	2009	cAMP and cAMP-inhibited cGMP 3,5-cyclic phosphodiesterase 10A	PF8	Q9QYJ6	C24H18N4O	378.426	378.148	47	51	63.69	4.2	5.27	1	3	5	n1ccc(cc1)c1cn[nH]c1c1ccc(cc1)OCc1ccc2c(n1)cccc2	1	C306H104MgN78O93S3Zn+4	test	ZnMg
3hr1	general	Protein-Ligand	1.53	IC50=0.37nM	IC50	9.43	2009	cAMP and cAMP-inhibited cGMP 3,5-cyclic phosphodiesterase 10A	PF9	Q9QYJ6	C25H20N4O	392.453	392.164	50	54	52.83	4.22	5.28	0	3	5	Cn1nc(c(c1)c1ccncc1)c1ccc(cc1)OCc1ccc2c(n1)cccc2	1	C365H122MgN93O106S5Zn+7	test	ZnMg
3hs4	refined	Protein-Ligand	1.1	Ki=10nM	Ki	8	2009	Carbonic anhydrase 2	AZM	P00918	C4H6N4O3S2	222.245	221.988	19	19	151.66	-1.23	1	2	5	3	CC(=O)Nc1nnc(s1)S(=O)(=O)N	1	C326H94N81O72S2Zn+4	train	Zn
3hu1	general	Protein-Ligand	2.81	Kd=0.13uM	Kd	6.89	2010	Transitional endoplasmic reticulum ATPase, R95G mutant	AGS	P55072	C10H19N5O12P3S	526.27	525.996	50	52	347.95	-5.01	-1.42	3	11	11	O[C@@H]1[C@@H](COP(OP(OP(S)(O)O)(O)O)(O)O)O[C@H]([C@@H]1O)n1cnc2c1ncnc2N	1	C340H124MgN96O93S2+8	test	Mg
3hu2	general	Protein-Ligand	2.85	Kd=0.06uM	Kd	7.22	2010	Transitional endoplasmic reticulum ATPase, R86A mutant	AGS	P55072	C10H19N5O12P3S	526.27	525.996	50	52	347.95	-5.01	-1.42	3	11	11	O[C@@H]1[C@@H](COP(OP(OP(S)(O)O)(O)O)(O)O)O[C@H]([C@@H]1O)n1cnc2c1ncnc2N	1	C321H124MgN102O94S3+10	valid	Mg
3hu3	refined	Protein-Ligand	2.2	Kd=0.13uM	Kd	6.89	2010	Transitional endoplasmic reticulum ATPase, R155H mutant	AGS	P55072	C10H19N5O12P3S	526.27	525.996	50	52	347.95	-5.01	-1.42	3	11	11	O[C@@H]1[C@@H](COP(OP(OP(S)(O)O)(O)O)(O)O)O[C@H]([C@@H]1O)n1cnc2c1ncnc2N	1	C306H112MgN92O88S+10	valid	Mg
3hvh	general	Protein-Ligand	1.3	Ki=3nM	Ki	8.52	2009	Catechol O-methyltransferase	542	P22734	C26H25FN6O6	536.512	536.182	64	68	174.88	1.71	2.15	6	8	12	CNc1ncnc2c1ncn2[C@@H]1O[C@@H]([C@H]([C@H]1O)O)/C=C/CNC(=O)c1cc(cc(c1O)O)c1ccc(cc1)F	1	C297H98MgN77O95S6+6	test	Mg
3hvi	refined	Protein-Ligand	1.2	Ki=5nM	Ki	8.3	2009	Rat catechol O-methyltransferase	619	P22734	C27H27FN6O6	550.538	550.198	67	71	174.88	2.08	2.54	6	8	13	CCNc1ncnc2c1ncn2[C@@H]1O[C@@H]([C@H]([C@H]1O)O)/C=C/CNC(=O)c1cc(cc(c1O)O)c1ccc(cc1)F	1	C302H101MgN78O96S7+6	train	Mg
3hvj	refined	Protein-Ligand	1.79	Ki=2nM	Ki	8.7	2009	Rat catechol O-methyltransferase	705	P22734	C28H29FN6O6	564.565	564.213	70	74	174.88	2.61	2.93	6	8	14	CCCNc1ncnc2c1ncn2[C@@H]1O[C@@H]([C@H]([C@H]1O)O)/C=C/CNC(=O)c1cc(cc(c1O)O)c1ccc(cc1)F	1	C317H105MgN79O100S7+6	train	Mg
3hvk	general	Protein-Ligand	1.3	Ki=3nM	Ki	8.52	2009	Catechol O-methyltransferase	719	P22734	C27H25FN6O7	564.522	564.177	66	70	188.79	-0.06	0.29	5	9	13	OCCNc1ncnc2c1ncn2[C@@H]1O[C@@H]([C@H]([C@H]1O)O)/C=C/CNC(=O)C1=CC(=CC(=O)C1=O)c1ccc(cc1)F	1	C292H97MgN72O91S5+4	train	Mg
3hww	refined	Protein-Ligand	1.95	Kd=75nM	Kd	7.12	2009	menaquinone synthesis protein MenD from E. coli	AKG	P17109	C5H6O5	146.098	146.022	16	15	91.67	1.43	-0.5	0	5	2	OC(=O)CCC(=O)C(=O)O	1	C179H65MgN46O53S+	train	Mg
3hwx	general	Protein-Ligand	2.6	Kd=13.9nM	Kd	7.86	2009	menaquinone synthesis protein MenD from E. coli	TPP	P17109	C12H22N4O7P2S	428.338	428.068	48	49	227.13	-1.64	1.36	1	7	7	Cc1ncc(c(n1)N)CN1CSC(=C1C)CCOP(OP(O)(O)O)(O)O	1	C401H139MgN113O120S+6	train	Mg
3hxc	general	Protein-Ligand	1.95	IC50=5.2uM	IC50	5.28	2009	Engineered Geranylgeranyl transferase type-2	BD6	Q08602 Q08603	C35H37N7O6	651.712	651.281	85	89	181.54	3.44	4.2	6	6	20	ONC(=O)[C@H](Cc1c[nH]c2c1cccc2)NC(=O)[C@@H](N(C(=O)[C@H](Cc1nc[nH]c1)NC(=O)OCc1ccccc1)C)Cc1ccccc1	1	C443H133N110O120S8Zn+6	valid	Zn
3hxd	general	Protein-Ligand	1.95	IC50=9uM	IC50	5.05	2009	Engineered Geranylgeranyl transferase type-2	BD7	Q08602 Q08603	C33H36N6O7	628.675	628.265	82	85	185.98	2.96	3.43	6	7	21	ONC(=O)[C@H](Cc1ccc(cc1)O)NC(=O)[C@@H](N(C(=O)[C@H](Cc1c[nH]cn1)NC(=O)OCc1ccccc1)C)Cc1ccccc1	1	C454H144N118O129S8Zn+9	train	Zn
3hxe	general	Protein-Ligand	1.95	IC50=4.7uM	IC50	5.33	2009	Engineered Geranylgeranyl transferase type-2	BD8	Q08602 Q08603	C43H57N7O5	751.957	751.442	112	115	169.41	7.09	6.4	5	7	29	CCCCCCCCCCC(=O)N[C@H](C(=O)N[C@H](C(=O)N[C@H](C(=O)N(CCc1ccccn1)C)Cc1ccc(cc1)O)Cc1ccccc1)Cc1[nH]cnc1	1	C560H170N135O149S12Zn+8	train	Zn
3hxf	general	Protein-Ligand	1.9	IC50=11uM	IC50	4.96	2009	Engineered Geranylgeranyl transferase type-2	BD9	Q08602 Q08603	C40H55N9O5	741.922	741.433	109	112	198.09	5.27	5.12	6	8	29	CCCCCCCCCCC(=O)N[C@H](C(=O)N[C@H](C(=O)N[C@H](C(=O)N(CCc1ccccn1)C)Cc1ccc(cc1)O)Cc1nc[nH]c1)Cc1[nH]cnc1	1	C557H184N143O141S7Zn+8	train	Zn
3hy7	general	Protein-Ligand	1.69	IC50=106nM	IC50	6.97	2009	Catalytic Domain of ADAMTS-5	097	Q9UNA0	C15H29N3O5	331.408	331.211	52	51	127.76	0.51	0.96	5	5	13	ONC(=O)[C@H]([C@H](C(=O)N[C@@H](C(C)(C)C)C(=O)NC)CC(C)C)O	1	C232H86CaN65O71S4Zn+6	train	ZnCa
3hy9	general	Protein-Ligand	2.02	IC50=17nM	IC50	7.77	2009	Catalytic Domain of ADAMTS-5	098	Q9UNA0	C24H30N3O5	440.512	440.219	62	65	135.5	1.81	0.95	6	5	14	ONC(=O)[C@H]([C@H](C(=O)N[C@@H]1[C@H](O)Cc2c1cccc2)Cc1cccc(c1)O)[NH2+]CC1CC1	1	C255H92CaN72O79S4Zn+7	valid	ZnCa
3hyf	general	Protein-Ligand	1.7	IC50=1.2uM	IC50	5.92	2009	HIV-1 RNase H p15	ON1	Q72547 P0A7Y4	C12H8Cl2N2O4	315.109	313.986	28	29	103.28	3.15	2.07	2	4	3	OC(=O)c1nc(Cc2ccc(c(c2)Cl)Cl)[nH]c(=O)c1O	1	C211H71Mn2N64O65+8	test	Mn
3hyg	general	Protein-Ligand	1.4	IC50=93nM	IC50	7.03	2009	Catalytic Domain of ADAMTS-5	099	Q9UNA0	C20H22N2O5	370.399	370.153	49	51	118.89	0.81	2	5	5	11	ONC(=O)C[C@H](C(=O)N[C@@H]1[C@H](O)Cc2c1cccc2)Cc1cccc(c1)O	1	C242H87CaN68O75S4Zn+7	train	ZnCa
3hzk	refined	Protein-Ligand	2.15	Kd=0.2uM	Kd	6.7	2010	S73-2 Fab (IgG1k)	KDA&KDO		C19H30O15	498.433	498.158	64	65	253.13	-1.75	-4.5	7	11	16	C=CCO[C@@]1(C[C@@H](O[C@@]2(C[C@@H](O)[C@H]([C@H](O2)[C@@H](CO)O)O)C(=O)O)[C@H]([C@H](O1)[C@@H](CO)O)O)C(=O)O	1	C222H77N58O63Zn+7	test	Zn
3hzm	refined	Protein-Ligand	1.8	Kd=3uM	Kd	5.52	2010	S73-2 Fab (IgG1k)	KDO		C8H14O8	238.192	238.069	30	30	147.68	-1.96	-3.38	5	7	7	OC[C@H]([C@H]1O[C@](O)(C[C@H]([C@H]1O)O)C(=O)O)O	1	C215H76N57O60Zn+6	train	Zn
3hzy	general	Protein-Ligand	2.1	Kd=0.1uM	Kd	7	2010	S73-2 Fab (IgG1k)	KDA&KDO		C19H30O14	482.433	482.164	63	64	232.9	-0.44	-3.12	6	10	14	C/C=C/O[C@@]1(C[C@@H](O[C@@]2(CC[C@H]([C@H](O2)[C@@H](CO)O)O)C(=O)O)[C@H]([C@H](O1)[C@@H](CO)O)O)C(=O)O	1	C189H71N45O50Zn+5	train	Zn
3i3b	refined	Protein-Ligand	2.2	Ki=5.9mM	Ki	2.23	2010	Beta-galactosidase	149	P00722	C6H10O6	178.14	178.048	22	22	107.22	-2.03	-3.01	4	5	5	OC[C@H]1OC(=O)[C@@H]([C@H]([C@H]1O)O)O	1	C237H107MgN71O82S6+5	test	Mg
3i3d	general	Protein-Ligand	2.2	Ki=10.3mM	Ki	1.99	2010	Beta-galactosidase	IPT	P00722	C9H18O5S	238.301	238.087	33	33	115.45	-0.46	-1.07	4	4	7	OC[C@H]1O[C@@H](SC(C)C)[C@@H]([C@H]([C@H]1O)O)O	1	C258H109MgN79O84S6+6	train	Mg
3i4y	refined	Protein-Ligand	1.85	Ki=0.09uM	Ki	7.05	2010	Catechol 1,2-dioxygenase	35C	P95607	C6H4Cl2O2	179.001	177.959	14	14	40.46	2.47	2.4	2	2	2	Clc1cc(O)c(c(c1)Cl)O	1	C279H87FeN64O69+5	train	Fe
3i51	refined	Protein-Ligand	1.8	Ki=0.02uM	Ki	7.7	2010	Catechol 1,2-dioxygenase	45C	P95607	C6H4Cl2O2	179.001	177.959	14	14	40.46	2.47	2.4	2	2	2	Oc1cc(Cl)c(cc1O)Cl	1	C291H89FeN67O73+5	train	Fe
3i7g	general	Protein-Ligand	1.95	IC50=430nM	IC50	6.37	2009	Collagenase 3, MMP-13	732	P45452	C20H23ClN2O3	374.861	374.14	49	51	71.34	4.64	4.81	2	2	7	CNC(=O)[C@H](C1CCCCC1)NC(=O)c1ccc(o1)c1ccc(cc1)Cl	1	C294H92CaN65O79SZn2+5	train	ZnCa
3i7i	general	Protein-Ligand	2.21	IC50=620nM	IC50	6.21	2009	Collagenase 3, MMP-13	518	P45452	C29H29N3O5	499.558	499.211	66	70	113.58	5.58	6.22	3	3	10	CNC(=O)[C@H](C1CCCCC1)NC(=O)c1ccc(o1)c1ccc(cc1)NC(=O)c1cc2c(o1)cccc2	1	C276H84CaN63O73S2Zn+5	train	ZnCa
3i9g	refined	Protein-Ligand	1.9	Kd=1.1nM	Kd	8.96	2009	LT1009 (SONEPCIZUMAB) antibody Fab fragment	S1P		C18H40NO5P	381.488	381.264	65	64	131.38	1.75	2.89	2	4	17	CCCCCCCCCCCCC/C=C/[C@H]([C@H](COP(O)(O)O)[NH3+])O	1	C271H90Ca2N66O77S+3	valid	Ca
3iad	general	Protein-Ligand	2.65	IC50=1nM	IC50	9	2010	human phosphodiesterase 4d	15X	Q08499	C21H18FN3O4	395.384	395.128	47	49	110.17	3.97	5.79	2	3	6	COc1ccc(c(c1c1cccc(c1)N(=O)=O)F)Cc1ccc(cc1)NC(=O)N	1	C414H136MgN107O121S5Zn+7	train	ZnMg
3iaf	general	Protein-Ligand	2.8	Ki=1.2mM	Ki	2.92	2010	benzaldehyde lyase A28S mutant	TPP	Q9F4L3	C12H21N4O7P2S	427.33	427.061	47	48	231.76	-1.41	1.34	1	7	7	Cc1ncc(c(n1)N)Cn1csc(c1C)CCOP(OP(O)(O)O)(O)O	1	C374H124MgN101O110PS2+4	train	Mg
3ibi	refined	Protein-Ligand	1.93	Ki=2.6nM	Ki	8.59	2009	human carbonic anhydrase II	BOW	P00918	C8H19NO3S	209.306	209.109	32	31	77.77	2.39	3.35	1	2	8	CCCCCCCCOS(=O)(=O)N	1	C315H99N79O70SZn+5	train	Zn
3ibl	refined	Protein-Ligand	1.55	Ki=14.6nM	Ki	7.84	2009	human carbonic anhydrase II	O59	P00918	C8H20N2O6S2	304.384	304.076	38	37	155.54	0.24	3.33	2	4	11	NS(=O)(=O)OCCCCCCCCOS(=O)(=O)N	1	C335H102N88O74SZn+6	test	Zn
3ibn	refined	Protein-Ligand	2.2	Ki=24.5nM	Ki	7.61	2009	human carbonic anhydrase II	O60	P00918	C10H24N2O6S2	332.437	332.108	44	43	155.54	1.32	4.11	2	4	13	NS(=O)(=O)OCCCCCCCCCCOS(=O)(=O)N	1	C338H107N89O79SZn+6	train	Zn
3ibu	refined	Protein-Ligand	1.41	Ki=0.7nM	Ki	9.15	2009	human carbonic anhydrase II	O48	P00918	C10H23NO3S	237.36	237.14	38	37	77.77	3.48	4.13	1	2	10	CCCCCCCCCCOS(=O)(=O)N	1	C343H101N87O79SZn+5	valid	Zn
3ieo	general	Protein-Ligand	2	Ki=331nM	Ki	6.48	2010	Carbonic anhydrase 2	AMJ	P00918	C13H18N2O3	250.294	250.132	36	36	67.43	0.27	1.24	2	2	8	COC[C@@H](C(=O)NCc1ccccc1)NC(=O)C	1	C354H105HgN89O78S2Zn+5	test	Zn
3ig1	general	Protein-Ligand	2.8	Kd=0.73uM	Kd	6.14	2010	HIV-1 Reverse Transcriptase	JTH	P03366	C10H12O3	180.2	180.079	25	25	54.37	0.71	0.64	1	3	2	CC(C1=CC(=O)C(=O)[C@H](C=C1)O)C	1	C167H64Mn2N49O56+4	test	Mn
3igp	refined	Protein-Ligand	1.65	Ki=94.5nM	Ki	7.02	2010	Carbonic anhydrase 2	DT7	P00918	C11H16N2O4S	272.321	272.083	34	35	90.24	0.31	1.98	1	2	3	COc1cc2CN(CCc2cc1OC)S(=O)(=O)N	1	C327H96N79O68SZn+4	train	Zn
3iit	general	Protein-Ligand	1.8	IC50=9.5nM	IC50	8.02	2010	Factor Xa	D14	P00742	C23H25ClN5O2S	470.995	470.142	57	61	116.66	3.49	4.7	2	4	6	Clc1ccc2c(c1)cnc(c2)C(=O)N[C@H]1CCCC[C@H]1NC(=O)c1sc2c(n1)C[N@H+](C2)C	1	C319H112CaN81O97S6+6	train	Ca
3ijy	general	Protein-Ligand	2.85	Kd=0.91uM	Kd	6.04	2009	promiscuous mAb S67-27	2-mer		C19H30O15	498.433	498.158	64	65	253.13	-1.41	-4.15	7	11	15	C/C=C\O[C@@]1(C[C@@H](O)[C@H]([C@H](O1)[C@@H](CO[C@@]1(C[C@@H](O)[C@H]([C@H](O1)[C@@H](CO)O)O)C(=O)O)O)O)C(=O)O	1	C223H77MgN57O61+7	valid	Mg
3ikc	general	Protein-Ligand	2.6	Kd=0.035uM	Kd	7.46	2009	promiscuous mAb S67-27	2-mer		C20H32O15	512.459	512.174	67	68	242.13	-1.43	-3.5	6	10	15	C/C=C\O[C@@]1(C[C@@H](O)[C@H]([C@H](O1)[C@@H](CO[C@@]1(C[C@@H](O)[C@H]([C@H](O1)[C@@H](CO)O)O)C(=O)O)OC)O)C(=O)O	1	C207H69MgN54O60+5	train	Mg
3iof	refined	Protein-Ligand	1.44	Ki=6uM	Ki	5.22	2010	metallo-Beta-lactamases (MBLs) subclass B2 enzyme CphA N220G mutant	IFS	P26918	C13H21O3PS	288.343	288.095	39	39	84.14	2.72	3.78	0	1	7	SCc1ccccc1P(=O)(OC(C)C)OC(C)C	1	C252H77N67O69SZn+8	test	Zn
3iog	refined	Protein-Ligand	1.41	Ki=3uM	Ki	5.52	2010	metallo-Beta-lactamases (MBLs) subclass B2 enzyme CphA N220G mutant	SDF	P26918	C7H8Cl2O3PS	274.081	272.931	22	22	113.08	1.41	2.66	0	3	2	Clc1ccc(c(c1)Cl)[C@H](P(O)(O)O)S	1	C223H70N61O60SZn+7	train	Zn
3ioi	general	Protein-Ligand	1.45	Ki=0.53uM	Ki	6.28	2010	Fucosylgalactoside alpha N-acetylgalactosaminyltransferase (GTA, cisAB mutant L266G, G268A)	1GW	P16442	C20H34N2O18P2S	684.499	684.1	77	80	376.02	-6.44	-4.74	8	13	18	OC[C@H]1CC[C@@H](S1)c1cn(c(=O)[nH]c1=O)[C@@H]1O[C@@H]([C@H]([C@H]1O)O)COP(OP(O[C@H]1O[C@H](CO)[C@@H]([C@@H]([C@H]1O)O)O)(O)O)(O)O	1	C343H101MnN78O86S2+7	valid	Mn
3ipx	general	Protein-Ligand	2	IC50=120nM	IC50	6.92	2010	Deoxycytidine kinase	B86	P27707	C9H12FN3O4	245.208	245.081	29	30	111.33	-0.93	-1.46	3	3	4	OC[C@H]1O[C@H](C[C@@H]1O)n1cc(F)c(=N)[nH]c1=O	1	C322H111MgN86O88S4+7	test	Mg
3itc	general	Protein-Ligand	1.7	Ki=25mM	Ki	1.6	2010	renal dipeptidase	CIT	Q93J45	C6H8O7	192.124	192.027	21	20	132.13	1.76	-1.25	1	7	3	OC(=O)C(CC(=O)O)(CC(=O)O)O	1	C194H80N58O57Zn2+5	train	Zn
3itu	general	Protein-Ligand	1.58	IC50=40uM	IC50	4.4	2009	hPDE2A catalytic domain	IBM	O00408	C10H14N4O2	222.244	222.112	30	31	72.68	0.95	0.08	1	3	2	CC(Cn1c(=O)n(C)c(=O)c2c1[nH]cn2)C	1	C249H108MgN68O70S5Zn+6	test	ZnMg
3iu7	general	Protein-Ligand	1.4	IC50=16uM	IC50	4.8	2010	M. tuberculosis methionine aminopeptidase	FCD	P9WK19	C11H7ClO3	222.624	222.008	22	23	50.44	3.92	3.3	0	2	1	Clc1ccccc1c1ccc(o1)C(=O)O	1	C239H98Mn2N63O74S4+5	valid	Mn
3iu8	general	Protein-Ligand	1.85	IC50=0.58uM	IC50	6.24	2010	M. tuberculosis methionine aminopeptidase	T03	P9WK19	C9H8FN3S	209.243	209.042	22	23	66.87	2.43	2.24	1	2	3	Fc1ccc(cc1)CSc1ncn[nH]1	1	C251H104N68Ni3O77S4+7	train	XX
3iu9	general	Protein-Ligand	1.75	IC50=0.24uM	IC50	6.62	2010	M. tuberculosis methionine aminopeptidase	T07	P9WK19	C9H8Cl2N4S	275.158	273.985	24	25	92.89	3.23	3.57	2	2	3	Clc1ccc(c(c1)Cl)CSc1[nH]nc(n1)N	1	C258H103N65Ni2O78S4+6	valid	XX
3iww	refined	Protein-Ligand	2.3	Ki=11nM	Ki	7.96	2009	human glutamate carboxypeptidase II	YZE	Q04609	C19H24IN3O6	517.315	517.071	53	53	144.83	4.2	3.15	3	6	13	C=CC[C@@H](C(=O)O)NC(=O)N[C@H](C(=O)O)CCCCNC(=O)c1ccc(cc1)I	1	C399H140N114O121SZn2+12	train	Zn
3jsi	general	Protein-Ligand	2.72	IC50=2.1nM	IC50	8.68	2009	Human phosphodiesterase 9A	WTC	O76083	C17H18N4O	294.351	294.148	40	43	63.57	2.1	2.83	1	2	3	O=c1[nH]c(Cc2ccccc2)nc2c1cnn2C1CCCC1	1	C298H113MgN79O81S6Zn+5	train	ZnMg
3jsw	general	Protein-Ligand	2.3	IC50=66nM	IC50	7.18	2009	Human phosphodiesterase 9A	JAR	O76083	C20H26N5O	352.453	352.214	52	55	68.01	2.11	3.09	2	2	4	C[C@@H]1C[N@@H+](C[C@H]1c1nc(=O)c2c([nH]1)n(nc2)C(C)C)Cc1ccccc1	1	C355H131MgN93O97S7Zn+7	valid	ZnMg
3juk	refined	Protein-Ligand	2.3	Kd=12.9uM	Kd	4.89	2010	UDP-glucose pyrophosphorylase (GalU)	UPG	O25363	C15H26N2O17P2	568.318	568.071	62	64	330.49	-6.8	-5.67	7	12	15	OC[C@H]1O[C@H](OP(OP(OC[C@H]2O[C@H]([C@@H]([C@@H]2O)O)n2ccc(=O)[nH]c2=O)(O)O)(O)O)[C@@H]([C@H]([C@@H]1O)O)O	1	C339H115Mg3N90O98S3+10	test	Mg
3jwq	general	Protein-Ligand	2.87	Ki=25nM	Ki	7.6	2009	chimeric PDE5/PDE6 catalytic domain	VIA	P51160 O76074	C22H31N6O4S	475.584	475.213	64	67	123	1.48	2.78	2	4	7	CCCc1nn(c2c1nc([nH]c2=O)c1cc(ccc1OCC)S(=O)(=O)N1CC[NH+](CC1)C)C	1	C395H144MgN103O110S6Zn+7	test	ZnMg
3jwr	general	Protein-Ligand	2.99	Ki=8.5nM	Ki	8.07	2009	chimeric PDE5/PDE6 catalytic domain	IBM	P18545 P51160 O76074	C10H14N4O2	222.244	222.112	30	31	72.68	0.95	0.08	1	3	2	CC(Cn1c(=O)n(C)c(=O)c2c1[nH]cn2)C	1	C261H105MgN68O73S6Zn+6	train	ZnMg
3k2f	refined	Protein-Ligand	1.98	Ki=63nM	Ki	7.2	2009	human Carbonic anhydrase 2	NKX	P00918	C14H20N4O12S3	532.523	532.024	53	54	278.94	1.34	4.15	1	9	10	CCN([C@H]1C[C@H](C)S(=O)(=O)c2c1cc(s2)S(=O)(=O)N)C(=O)OC[C@H](ON(=O)=O)CON(=O)=O	1	C357H113N87O77S2Zn+5	valid	Zn
3k3e	general	Protein-Ligand	2.7	IC50=22nM	IC50	7.66	2010	PDE9A catalytic domain	PDB	O76083	C16H15F3N4O	336.312	336.12	39	41	63.57	3.2	3.16	1	2	3	C[C@@H](C(F)(F)F)Cc1[nH]c(=O)c2c(n1)n(nc2)c1ccccc1C	1	C299H112MgN79O81S6Zn+5	test	ZnMg
3k3h	general	Protein-Ligand	2.5	IC50=88nM	IC50	7.06	2010	PDE9A catalytic domain	BYE	O76083	C16H15F3N4O	336.312	336.12	39	41	63.57	3.2	3.16	1	2	3	C[C@H](C(F)(F)F)Cc1nc(=O)c2c([nH]1)n(nc2)c1ccccc1C	1	C306H115MgN80O83S6Zn+5	train	ZnMg
3k5i	general	Protein-Ligand	2	Kd=20uM	Kd	4.7	2009	Phosphoribosyl-aminoimidazole carboxylase	AIR	A1CII2	C8H15N3O7P	296.194	296.065	34	35	177.04	-3.75	-1.66	3	6	5	O[C@@H]1[C@@H](COP(O)(O)O)O[C@H]([C@@H]1O)n1cncc1N	1	C222H89MgN71O69S3+8	valid	Mg
3k5x	refined	Protein-Ligand	1.4	Ki=390nM	Ki	6.41	2010	renal dipeptidase	P8D	Q93J45	C7H16NO6P	241.179	241.072	31	30	156.29	-2.21	-1.42	1	6	4	OC(=O)C[C@H](C(=O)O)CP([C@@H]([NH3+])C)(O)O	1	C219H92N66O69Zn2+6	train	Zn
3kec	general	Protein-Ligand	2.05	IC50=58nM	IC50	7.24	2010	Human MMP-13	3KE	P45452	C24H21N5O4	443.455	443.159	54	57	119.23	4.73	3.42	1	6	8	COc1ccc(cc1)Cn1nnc(n1)c1cccc(c1)C(=O)NCc1ccc(cc1)C(=O)O	1	C310H97N75O86S3Zn+6	train	Zn
3ked	general	Protein-Ligand	2.3	IC50=3.6mM	IC50	2.44	2010	Aminopeptidase N,ePepN	DAB	P04825	C4H12N2O2	120.15	120.09	20	19	92.58	-3.06	-2.69	2	2	2	OC(=O)[C@@H]([NH3+])CC[NH3+]	1	C253H95N67O72S5Zn+6	test	Zn
3kek	refined	Protein-Ligand	1.97	Ki=4.4nM	Ki	8.36	2010	Human MMP-13	3EK	P45452	C24H26FN5O3	451.493	451.202	59	62	110	4.33	4	1	6	7	Cc1cc(cc(n1)C(=O)NCc1ccc(cc1)F)c1ncn(n1)C[C@@H]1CC[C@H](CC1)C(=O)O	1	C313H94N75O82S3Zn+9	valid	Zn
3ken	general	Protein-Ligand	2.5	IC50=4uM	IC50	5.4	2010	Kinesin-like protein KIF11, Domain Human Eg5	ZZD	P52732	C22H22NO2S	364.481	364.137	48	50	90.24	2.84	3.41	1	2	6	[NH3+][C@H](C(=O)O)CSC(c1ccccc1)(c1ccccc1)c1ccccc1	1	C269H92MgN69O81S+7	train	Mg
3kgq	refined	Protein-Ligand	1.7	Ki=5mM	Ki	2.3	2010	Carboxypeptidase A1	CIT	P00730	C6H8O7	192.124	192.027	21	20	132.13	1.76	-1.25	1	7	3	OC(=O)C(CC(=O)O)(CC(=O)O)O	1	C263H86N66O77Zn+3	train	Zn
3kig	general	Protein-Ligand	1.39	IC50=245nM	IC50	6.61	2010	Carbonic anhydrase 2, CA2-H64C	DA4	P00918	C8H7NO2S	181.212	181.02	19	19	68.54	0.73	2.1	1	2	2	C#Cc1cccc(c1)S(=O)(=O)N	1	C294H96N75O67S2Zn+6	valid	Zn
3kmc	refined	Protein-Ligand	1.8	Ki=400nM	Ki	6.4	2009	TNF-alpha-converting enzyme	403	P78536	C14H22N3O4S	328.407	328.133	44	45	134.72	-1.18	-0.57	4	4	10	O=C([C@@H]([C@H](C(=O)N1CC[NH2+]CC1)O)O)NCCc1cccs1	1	C277H94N73O88S3Zn+7	train	Zn
3kme	general	Protein-Ligand	1.85	Ki=725nM	Ki	6.14	2009	TNF-alpha-converting enzyme	Z59	P78536	C19H22N2O4S	374.454	374.13	48	50	118.11	1.03	1.78	3	4	10	O=C([C@@H]([C@H](C(=O)N1CCC[C@@H]1c1ccccc1)O)O)NCc1cccs1	1	C281H95N76O87S4Zn+8	train	Zn
3kqa	general	Protein-Ligand	2.25	IC50=14uM	IC50	4.85	2010	UDP-N-acetylglucosamine 1-carboxyvinyltransferase, MurA	TR9	P33038	C7H10O4	158.152	158.058	21	21	80.92	-1.22	0	4	4	4	O[C@H]1CC(=C(C(=C)[C@@H]1O)O)O	1	C149H51Ca2N37O38S+5	test	Ca
3kqr	refined	Protein-Ligand	1.5	Kd=36.8uM	Kd	4.43	2010	Serum amyloid P-component,SAP	OPE	P02743	C2H10NO4P	143.079	143.035	18	17	111.15	-4.94	-2.1	1	3	2	[NH3+]CCOP(O)(O)O	1	C108H44Ca2N30O37+3	train	Ca
3kr4	refined	Protein-Ligand	2	Ki=25nM	Ki	7.6	2010	Plasmodium falciparum M17 leucyl aminopeptidase	BES	Q8IL11	C16H25N2O4	309.381	309.181	47	47	114.27	-0.08	0.21	3	4	9	O[C@@H]([C@@H](Cc1ccccc1)[NH3+])C(=O)N[C@H](C(=O)O)CC(C)C	1	C317H114MgN79O94S4Zn+5	train	ZnMg
3kr5	general	Protein-Ligand	2.56	Ki=13nM	Ki	7.89	2010	Plasmodium falciparum M17 leucyl aminopeptidase	BEY	Q8IL11	C19H26NO4P	363.388	363.16	51	52	118.99	0.75	1.96	1	4	8	OC(=O)[C@@H](CP([C@@H](CCc1ccccc1)[NH3+])(O)O)Cc1ccccc1	1	C316H117N82O98S4Zn2+5	train	Zn
3kry	general	Protein-Ligand	1.9	IC50=0.1nM	IC50	10	2010	Matrix metalloproteinases MMP-13	3KR	P45452	C22H24F3N2O7S	517.495	517.126	59	61	121.15	3.43	5.16	1	4	9	COCC[N@@H+]1CC[C@](CC1)(C(=O)N=O)S(=O)(=O)c1ccc(cc1)Oc1ccc(cc1)OC(F)(F)F	1	C284H87CaN64O73SZn+5	train	ZnCa
3ksq	general	Protein-Ligand	2.1	IC50=0.38nM	IC50	9.42	2010	Farnesyltransferase	Z96	Q02293 Q04631	C28H33ClN5O3	523.046	522.227	70	74	84.92	2.69	4.79	2	4	7	Clc1ccc2c(c1)C(=Cc1c([C@H]2[NH+]2CCN(CC2)C(=O)OC(C)(C)C)nccc1)[C@H](c1cncn1C)O	1	C356H112N96O95S4Zn+8	valid	Zn
3kv2	refined	Protein-Ligand	1.55	Kd=47.51nM	Kd	7.32	2009	human arginase-1	NNH	P05089	C5H13N4O3	177.182	177.099	25	24	135.58	-3.13	-1.54	4	3	5	O/N=C(/NCC[C@@H](C(=O)O)[NH3+])\N	1	C238H85Mn2N73O83S+4	train	Mn
3l0v	refined	Protein-Ligand	1.75	Ki=23nM	Ki	7.64	2010	catalytic domain of TACE	724	P78536	C13H14N4O4	290.275	290.102	35	37	105.22	0.26	0.59	3	3	3	COc1ccc2c(c1)c(=O)n([nH]2)C[C@@]1(C)NC(=O)NC1=O	1	C251H87N63O74S2Zn+7	train	Zn
3l2y	general	Protein-Ligand	2.7	Kd=32.07uM	Kd	4.49	2010	C-reactive protein; CRP	OPE	P02741	C2H10NO4P	143.079	143.035	18	17	111.15	-4.94	-2.1	1	3	2	[NH3+]CCOP(O)(O)O	1	C168H64Ca2N41O58+	test	Ca
3l3n	refined	Protein-Ligand	2.3	Ki=6.6nM	Ki	8.18	2010	Angiotensin-converting enzyme, ACE	LSW	P12821	C27H36N4O5	496.599	496.269	72	74	163.74	0.17	1.1	4	5	14	[NH3+]CCCC[C@@H](C(=O)N[C@H](C(=O)O)Cc1c[nH]c2c1cccc2)[NH2+][C@H](C(=O)O)CCc1ccccc1	1	C435H158N109O123S5Zn+8	train	Zn
3l7g	general	Protein-Ligand	2.7	Ki=0.5mM	Ki	3.3	2010	organophosphate acid anhydrolase (OPAA) from Alteromonas sp. strain JD6.5	M44	Q44238	C6H18N2O2P	181.193	181.111	29	28	78.11	-0.06	1.43	2	2	4	CC(NP(NC(C)C)(O)O)C	1	C218H83Mn3N56O59S+4	test	Mn
3ldw	general	Protein-Ligand	2.47	Ki=10.7nM	Ki	7.97	2010	Farnesyl pyrophosphate synthase, PvGGPPS	ZOL	A5K4U6	C5H12N2O7P2	274.106	274.012	28	28	186.61	-4.64	-1.99	1	8	3	OP(C(P(O)(O)O)(Cn1cncc1)O)(O)O	1	C290H110Mg3N78O89S3+8	train	Mg
3le9	refined	Protein-Ligand	1.85	Ki=6nM	Ki	8.22	2010	catalytic domain of TACE (TNF-alpha converting enzyme)	727	P78536	C18H16N4O4	352.344	352.117	42	45	105.22	1.55	1.73	3	3	4	COc1ccc2c(c1)c(=O)n([nH]2)C[C@]1(NC(=O)NC1=O)c1ccccc1	1	C216H74N55O64S2Zn+7	test	Zn
3lea	refined	Protein-Ligand	2	Ki=0.8nM	Ki	9.1	2010	catalytic domain of TACE (TNF-alpha converting enzyme)	Z93	P78536	C24H20N4O4	428.44	428.148	52	56	100.63	1.73	3.04	2	4	5	COc1ccc2c(c1)C(=O)N(C2)C[C@]1(NC(=O)NC1=O)c1ccc(cc1)c1cccnc1	1	C205H72N48O57S3Zn+4	test	Zn
3lgp	general	Protein-Ligand	1.9	Ki=2nM	Ki	8.7	2010	catalytic domain of TACE (TNF-alpha converting enzyme)	50X	P78536	C28H26ClF3N4O4S	607.044	606.132	67	71	135.93	3.72	4.85	3	5	12	Clc1cccc(c1)[C@H]1CCCN1C(=O)[C@@H]([C@H](C(=O)NCc1ccc(s1)Cn1c2ccccc2nc1C(F)(F)F)O)O	1	C332H108N87O103S4Zn+9	test	Zn
3lik	general	Protein-Ligand	1.8	Ki=1.92nM	Ki	8.72	2010	Macrophage metalloelastase, MMP12	EEG	P39900	C29H31N3O7S	565.637	565.188	71	73	204.13	5.35	4.68	3	7	15	O=C(N[C@H](C(=O)N[C@H](C(=O)N)CCC(=O)O)CCC(=O)O)CCc1ccc(cc1)c1scc(c1)c1ccccc1	1	C304H95CaN76O82SZn+7	train	ZnCa
3lil	general	Protein-Ligand	1.8	Ki=8.3nM	Ki	8.08	2010	Macrophage metalloelastase, MMP12	EEA	P39900	C28H29ClN4O8	585.005	584.167	70	72	201.92	4.78	4.26	3	8	15	O=C(N[C@H](C(=O)N[C@H](C(=O)N)CCC(=O)O)CCC(=O)O)CCc1onc(c1)c1ccc(cc1)c1cccc(c1)Cl	1	C298H94CaN77O79SZn+9	test	ZnCa
3lir	refined	Protein-Ligand	1.9	Ki=119nM	Ki	6.92	2010	Macrophage metalloelastase, MMP12	EEC	P39900	C22H26N4O8	474.464	474.175	60	61	201.92	2.53	1.94	3	8	14	O=C(N[C@H](C(=O)N[C@H](C(=O)N)CCC(=O)O)CCC(=O)O)CCc1onc(c1)c1ccccc1	1	C316H94CaN80O83SZn+8	train	ZnCa
3liw	refined	Protein-Ligand	2.22	Ki=0.025uM	Ki	7.6	2003	coagulation factor xa	RUP	P00742	C29H38N5O2	488.644	488.303	74	78	121.84	5.84	3.42	3	2	12	O=C(N[C@@H](C(=O)NCCc1ccccc1)Cc1cccc(c1)C(=[NH2+])N)N[C@@H]1[C@@H]2C[C@@H]3C[C@H]1C[C@H](C2)C3	1	C310H114CaN86O95S6+9	train	Ca
3ljg	refined	Protein-Ligand	1.31	Ki=18.6nM	Ki	7.73	2010	Macrophage metalloelastase, MMP12	EEF	P39900	C25H29N3O7	483.514	483.201	64	65	175.89	4.01	2.95	3	7	14	O=C(N[C@H](C(=O)N[C@H](C(=O)N)CCC(=O)O)CCC(=O)O)CCc1ccc(cc1)c1ccccc1	1	C298H95CaN76O78SZn+8	train	ZnCa
3ljt	general	Protein-Ligand	1.6	IC50=129nM	IC50	6.89	2010	A disintegrin and metalloproteinase with thrombospondin motifs 5, ADAMTS-5	LA3	Q9UNA0	C27H26N2O6	474.505	474.179	61	65	117.12	2.61	3.69	4	4	11	ONC(=O)C[C@H](C(=O)N[C@@H]1[C@H](O)Cc2c1cccc2)Cc1ccc(cc1)c1ccc2c(c1)OCO2	1	C270H105CaN72O79S3Zn+8	train	ZnCa
3ljz	refined	Protein-Ligand	2	Ki=7.3nM	Ki	8.14	2011	Collagenase 3, MMP-13	LA3	P45452	C27H26N2O6	474.505	474.179	61	65	117.12	2.61	3.69	4	4	11	ONC(=O)C[C@H](C(=O)N[C@@H]1[C@H](O)Cc2c1cccc2)Cc1ccc(cc1)c1ccc2c(c1)OCO2	1	C302H92CaN67O81S2Zn+4	train	ZnCa
3lk8	refined	Protein-Ligand	1.8	Kd=19.7nM	Kd	7.71	2010	catalytic domain of human MMP12	Z79	P39900	C9H12N2O5S	260.267	260.047	29	29	113.11	-0.29	1.34	3	4	7	ONC(=O)CNS(=O)(=O)c1ccc(cc1)OC	1	C281H89CaN68O69SZn+6	train	ZnCa
3lka	refined	Protein-Ligand	1.8	Kd=1.5mM	Kd	2.82	2010	F171D mutant of human MMP-12 catalytic domain (Gly106-Gly263)	M4S	P39900	C7H9NO3S	187.216	187.03	21	21	77.77	0.46	2.12	1	2	2	COc1ccc(cc1)S(=O)(=O)N	1	C247H82N58O58SZn+6	train	Zn
3llm	general	Protein-Ligand	2.8	Kd=18uM	Kd	4.74	2010	Nucleotide binding domain of the DEIH-motif-containing helicase DHX9 (329-563)	ADP	Q08211	C10H17N5O10P2	429.217	429.045	44	46	266.1	-4.89	-2.04	3	10	7	O[C@@H]1[C@@H](COP(OP(O)(O)O)(O)O)O[C@H]([C@@H]1O)n1cnc2c1ncnc2N	1	C180H65MnN51O58SSe+3	train	Mn
3lp0	general	Protein-Ligand	2.79	IC50=0.11uM	IC50	6.96	2010	HIV-1 reverse transcriptase	LP7	P04585	C11H12N2O5	252.223	252.075	30	31	103.12	0.48	0.72	3	5	6	CCOC(=O)C1=C(O)N(c2c([C@@H]1O)cccn2)O	1	C176H62Mn2N54O59+5	valid	Mn
3lp1	general	Protein-Ligand	2.23	IC50=0.12uM	IC50	6.92	2010	HIV-1 reverse transcriptase	LP8	P04585	C13H14N2O3	246.262	246.1	32	34	78.81	2.08	2.73	2	4	3	Oc1c(C2CCCC2)c(O)[n+](c2c1cccn2)[O-]	1	C175H61Mn2N54O56+6	train	Mn
3lp4	refined	Protein-Ligand	1.9	Kd=13.1uM	Kd	4.88	2010	Arginase-1	LYS	P05089	C6H16N2O2	148.203	148.121	26	25	92.58	-2.35	-1.91	2	2	4	[NH3+]CCCC[C@@H](C(=O)O)[NH3+]	1	C233H83Mn2N70O83S+3	train	Mn
3lp7	refined	Protein-Ligand	2.04	Kd=3.6uM	Kd	5.44	2010	human arginase-1	HAR	P05089	C6H16N4O3	192.216	192.122	29	28	137.19	-1.95	-3.07	2	3	5	ON/C(=[NH+]\CCC[C@@H](C(=O)O)[NH3+])/N	1	C237H81Mn2N72O83S+3	train	Mn
3lpl	refined	Protein-Ligand	2.1	Kd=2.39uM	Kd	5.62	2010	Pyruvate dehydrogenase E1 component	TDP	P0AFG9	C2H10O7P2	208.044	207.99	21	20	146.79	-2.53	-0.64	0	5	3	CCOP(OP(O)(O)O)(O)O	1	C254H92MgN66O80S4+4	train	Mg
3lpt	general	Protein-Ligand	2	IC50=12.2uM	IC50	4.91	2010	HIV-1 IN core domain	723	P12497	C17H12ClNO3	313.735	313.051	34	36	70.16	4.05	3.48	1	3	2	OC(=O)Cc1c(=O)[nH]c2c(c1c1ccccc1)cc(cc2)Cl	1	C174H53Ca2N47O50S+5	test	Ca
3lpu	general	Protein-Ligand	1.95	IC50=1.37uM	IC50	5.86	2010	HIV-1 IN core domain	976	P12497	C21H20ClNO2	353.842	353.118	45	47	50.19	6.98	5.83	0	3	4	CCC[C@@H](c1c(C)nc2c(c1c1ccccc1)cc(cc2)Cl)C(=O)O	1	C177H53Ca2N48O51S+5	train	Ca
3lq2	refined	Protein-Ligand	1.96	Kd=5.97uM	Kd	5.22	2010	Pyruvate dehydrogenase E1 component	TDP	P0AFG9	C12H21N4O7P2S	427.33	427.061	47	48	231.76	-1.41	1.34	1	7	7	Cc1ncc(c(n1)N)Cn1csc(c1C)CCOP(OP(O)(O)O)(O)O	1	C394H145MgN105O123S5+6	valid	Mg
3lq4	general	Protein-Ligand	1.98	Kd=5.97uM	Kd	5.22	2010	Pyruvate dehydrogenase E1 component	TDP	P0AFG9	C12H21N4O7P2S	427.33	427.061	47	48	231.76	-1.41	1.34	1	7	7	Cc1ncc(c(n1)N)Cn1csc(c1C)CCOP(OP(O)(O)O)(O)O	1	C397H147MgN106O124S5+5	train	Mg
3luo	general	Protein-Ligand	2.55	Kd=113nM	Kd	6.95	2010	thermophilic Peptidyl-prolyl cis-trans isomerase	6-mer	Q5SLE7	C27H41N6O9	593.649	593.294	83	84	227.57	0.29	1.01	5	9	18	CC(C[C@@H](C(=O)N1CCC[C@H]1C(=O)N[C@H](C(=O)Nc1ccc(cc1)N(=O)=O)C)NC(=O)[C@@H]([NH2+][C@H](CCC(=O)O)O)C)C	1	C263H81N72O70Zn2+5	train	Zn
3lxe	refined	Protein-Ligand	1.9	Ki=250nM	Ki	6.6	2010	Human Carbonic Anhydrase I	TOR	P00915	C12H21NO8S	339.362	339.099	43	45	123.92	-0.83	1.39	1	2	3	NS(=O)(=O)OC[C@]12OC[C@@H]3[C@H]([C@@H]2OC(O1)(C)C)OC(O3)(C)C	1	C316H95N83O72SZn+7	test	Zn
3lxg	general	Protein-Ligand	2.3	IC50=7.28nM	IC50	8.14	2010	rat phosphodiesterase 10A	Z73	Q9QYJ6	C15H19N4O	271.338	271.156	39	41	54.9	3.94	2.27	1	2	3	CCCc1[nH]c(c2[n+]1c1nc(OC)ccc1nc2C)C	1	C314H123MgN79O96S5Zn+4	train	ZnMg
3ly2	general	Protein-Ligand	2.6	IC50=5nM	IC50	8.3	2010	Catalytic Domain of Human Phosphodiesterase 4B	Z72	Q07343	C20H18Cl2N2O4	421.274	420.064	46	49	73.59	4.57	5.64	1	2	5	COc1ccc2c(c1OC1CCCC1)oc(=O)cc2Nc1c(Cl)cncc1Cl	1	C362H118MgN98O104S5Zn+9	train	ZnMg
3m1k	refined	Protein-Ligand	1.35	Ki=4.1uM	Ki	5.39	2010	Human Carbonic anhydrase 2	BEW	P00918	C5H7NOS	129.18	129.025	15	15	62.27	1.15	0.96	1	1	2	SC1=CC=CCN1O	1	C298H90N74O65SZn+4	train	Zn
3m3x	refined	Protein-Ligand	1.68	Kd=0.15uM	Kd	6.82	2010	human carbonic anhydrase II	JS7	P00918	C13H15N5O5S	353.354	353.079	39	40	161.4	1.73	3.07	2	6	6	COc1ncnc(c1N(=O)=O)NCCc1ccc(cc1)S(=O)(=O)N	1	C332H102N84O71S2Zn+6	train	Zn
3m40	refined	Protein-Ligand	1.6	Kd=0.17uM	Kd	6.77	2010	human carbonic anhydrase II	J45	P00918	C10H8ClN5O4S	329.72	328.999	29	30	152.17	1.98	3.81	2	6	3	O=N(=O)c1c(ncnc1Cl)Nc1ccc(cc1)S(=O)(=O)N	1	C317H97N85O68S2Zn+6	test	Zn
3m5e	refined	Protein-Ligand	1.7	Kd=0.043uM	Kd	7.37	2010	human carbonic anhydrase II	JDR	P00918	C13H13ClN4O3S2	372.85	372.012	36	37	148.72	2.4	3.78	2	5	6	O=Cc1c(NCc2ccc(cc2)S(=O)(=O)N)nc(nc1Cl)SC	1	C365H109N91O80S2Zn+6	train	Zn
3m67	refined	Protein-Ligand	1.8	Kd=0.18uM	Kd	6.74	2010	human carbonic anhydrase isozyme II	E36	P00918	C17H14ClN3O5S2	439.893	439.006	42	45	158.05	2.65	4.39	2	4	5	O=C(c1ccc(c(c1)S(=O)(=O)N)Cl)CSc1nc2c([nH]1)cc1c(c2)OCCO1	1	C347H107N86O78SZn+7	test	Zn
3m6p	general	Protein-Ligand	2	Kd=4.5nM	Kd	8.35	2011	Peptide deformylase 1B (PDF1B)	BB2	Q9FUZ2	C19H35N3O5	385.498	385.258	62	62	118.97	1.55	1.92	4	5	16	CCCCC[C@@H](C(=O)N[C@H](C(=O)N1CCC[C@H]1CO)C(C)C)CC(=O)NO	1	C324H99N79O86S4Zn2+6	train	Zn
3m6q	general	Protein-Ligand	2.4	Kd=48nM	Kd	7.32	2011	Peptide deformylase 1B (PDF1B) G41Q	BB2	Q9FUZ2	C19H35N3O5	385.498	385.258	62	62	118.97	1.55	1.92	4	5	16	CCCCC[C@@H](C(=O)N[C@H](C(=O)N1CCC[C@H]1CO)C(C)C)CC(=O)NO	1	C292H90N72O79S4Zn2+5	train	Zn
3m6r	refined	Protein-Ligand	2.4	Kd=32nM	Kd	7.49	2011	Peptide deformylase 1B (PDF1B) G41M	BB2	Q9FUZ2	C19H35N3O5	385.498	385.258	62	62	118.97	1.55	1.92	4	5	16	CCCCC[C@@H](C(=O)N[C@H](C(=O)N1CCC[C@H]1CO)C(C)C)CC(=O)NO	1	C298H87N73O77S5Zn2+5	train	Zn
3m96	refined	Protein-Ligand	1.4	Kd=60nM	Kd	7.22	2011	Carbonic anhydrase 2	E38	P00918	C15H11BrClN3O3S2	460.753	458.911	36	38	139.59	3.63	5.38	2	4	5	Brc1ccc2c(c1)nc([nH]2)SCC(=O)c1ccc(c(c1)S(=O)(=O)N)Cl	1	C331H106N85O79SZn+5	train	Zn
3max	general	Protein-Ligand	2.05	IC50=0.90uM	IC50	6.05	2010	Human Histone deacetylase 2, HDAC2	LLX	Q92769	C19H16N2O	288.343	288.126	38	40	55.12	3.7	4.84	2	1	4	O=C(c1ccccc1)Nc1cc(ccc1N)c1ccccc1	1	C362H121CaN94O99S5Zn+4	test	ZnCa
3mbl	general	Protein-Ligand	2.6	IC50=0.018uM	IC50	7.74	2010	human mitogen-activated protein kinase kinase 1 (MEK 1)	LSG	Q02750	C16H17FIN3O4	461.227	461.025	42	43	92.59	2.5	2.83	3	3	9	OCCONC(=O)c1cc(n(c1Nc1ccc(cc1F)I)C)C(=O)C	1	C308H109MgN80O83S5+6	test	Mg
3mdz	refined	Protein-Ligand	2.32	Ki=0.8nM	Ki	9.1	2010	Human Carbonic Anhydrase VII	EZL	P43166	C9H10N2O3S2	258.317	258.013	26	27	118.9	1.61	3.12	1	3	3	CCOc1ccc2c(c1)sc(n2)S(=O)(=O)N	1	C302H96N80O78Zn+6	train	Zn
3mfv	refined	Protein-Ligand	1.9	Ki=3000uM	Ki	2.52	2010	human arginase I	Z70	P05089	C7H13N4O2	185.204	185.104	26	26	119.64	-2.34	-0.8	3	3	3	Nc1ncc([nH]1)CC[C@H]([NH3+])C(=O)O	1	C236H86Mn2N71O84S+4	valid	Mn
3mfw	refined	Protein-Ligand	1.47	Ki=300uM	Ki	3.52	2010	human arginase I	B3U	P05089	C6H11N4O2	171.177	171.088	23	23	119.64	-2.7	-1.19	3	3	2	Nc1ncc([nH]1)C[C@H]([NH3+])C(=O)O	1	C228H84Mn2N66O82S+2	train	Mn
3mhc	refined	Protein-Ligand	1.7	Ki=11nM	Ki	7.96	2010	human cabonic anhydrase II	ARZ	P00918	C13H18N4O3S2	342.437	342.082	40	43	151.66	1.35	3.19	2	5	4	O=C([C@]12C[C@H]3C[C@@H](C2)C[C@@H](C1)C3)Nc1nnc(s1)S(=O)(=O)N	1	C255H90N62O58SZn+6	train	Zn
3mhi	refined	Protein-Ligand	1.7	Kd=0.2uM	Kd	6.7	2010	human carbonic anhydrase II	J90	P00918	C11H11N5O5S	325.301	325.048	33	34	172.4	1.49	2.73	3	7	5	O=N(=O)c1c(ncnc1O)NCc1ccc(cc1)S(=O)(=O)N	1	C299H97N76O65SZn+6	test	Zn
3mhl	refined	Protein-Ligand	1.9	Kd=0.056uM	Kd	7.25	2010	human carbonic anhydrase II	J71	P00918	C12H13N5O5S	339.327	339.064	36	37	161.4	1.26	3.03	2	6	5	COc1ncnc(c1N(=O)=O)NCc1ccc(cc1)S(=O)(=O)N	1	C357H107N89O81SZn+5	train	Zn
3mhm	refined	Protein-Ligand	1.5	Kd=0.1uM	Kd	7	2010	human carbonic anhydrase II	J75	P00918	C18H18N6O4S	414.438	414.111	47	49	164.2	3.32	4.71	3	6	7	O=N(=O)c1c(NCc2ccc(cc2)S(=O)(=O)N)ncnc1NCc1ccccc1	1	C369H106N92O81S2Zn+8	valid	Zn
3mho	refined	Protein-Ligand	1.15	Kd=0.32uM	Kd	6.49	2010	human carbonic anhydrase II	J43	P00918	C12H11ClN4O3S2	358.824	357.996	33	34	148.72	2.46	3.91	2	5	5	O=Cc1c(Nc2ccc(cc2)S(=O)(=O)N)nc(nc1Cl)SC	1	C336H100N82O72SZn+4	train	Zn
3mi3	refined	Protein-Ligand	2.38	Ki=3.56uM	Ki	5.45	2010	Homocitrate synthase, mitochondrial,HCS	LYS	Q9Y823	C6H16N2O2	148.203	148.121	26	25	92.58	-2.35	-1.91	2	2	4	[NH3+]CCCC[C@@H](C(=O)O)[NH3+]	1	C275H113N72O85SZn+6	valid	Zn
3mjl	refined	Protein-Ligand	1.9	Ki=3.6mM	Ki	2.44	2010	human arginase I	2AI	P05089	C3H5N3	83.092	83.048	11	11	54.7	-0.29	0.57	2	1	0	Nc1ncc[nH]1	1	C192H78Mn2N57O71S+	train	Mn
3mkn	general	Protein-Ligand	2	Ki=76uM	Ki	4.12	2010	E. coli pyrimidine nucleosidase YeiK	DNB	C3T3U2	C11H18N3O3	240.279	240.135	35	36	129.34	-1.57	0.28	6	3	5	OC[C@H]1[NH2+][C@H]([C@@H]([C@@H]1O)O)c1ccc(c(c1)N)N	1	C264H103CaN72O84S4+	train	Ca
3ml2	refined	Protein-Ligand	1.8	Ki=9nM	Ki	8.05	2011	Carbonic anhydrase 2	SU0	P00918	C18H16N2O6S	388.394	388.073	43	45	137.08	0.77	3.48	2	4	6	COc1ccc2c(c1)oc(=O)cc2CC(=O)Nc1ccc(cc1)S(=O)(=O)N	1	C332H103N85O72S2Zn+7	train	Zn
3ml5	refined	Protein-Ligand	2.05	Ki=3.0nM	Ki	8.52	2011	C183S/C217S mutant of human CA VII	AZM	P43166	C4H6N4O3S2	222.245	221.988	19	19	151.66	-1.23	1	2	5	3	CC(=O)Nc1nnc(s1)S(=O)(=O)N	1	C317H98N85O76SZn+8	train	Zn
3mle	general	Protein-Ligand	2.8	Kd=5.8uM	Kd	5.24	2010	Dethiobiotin synthetase	ADP	O24872	C10H17N5O10P2	429.217	429.045	44	46	266.1	-4.89	-2.04	3	10	7	O[C@@H]1[C@@H](COP(OP(O)(O)O)(O)O)O[C@H]([C@@H]1O)n1cnc2c1ncnc2N	1	C231H94MgN73O74S2+7	train	Mg
3mmf	refined	Protein-Ligand	1.5	Ki=37nM	Ki	7.43	2011	human carbonic anhydrase II	D9H	P00918	C11H13ClN6O3S	344.777	344.046	35	36	151.5	1.01	2.25	4	6	7	OCCNc1nc(Nc2ccc(cc2)S(=O)(=O)N)nc(n1)Cl	1	C302H95N78O64S2Zn+7	train	Zn
3mmr	general	Protein-Ligand	2.14	Kd=11uM	Kd	4.96	2010	dN-PFA (P. falciparum arginase)	ABH	Q8I384	C6H15BNO5	191.998	192.104	28	27	122.47	-2.67	-1.79	3	5	7	OC(=O)[C@H](CCCC[B](=O)(O)O)[NH3+]	1	C255H94Mn2N72O87S+3	train	Mn
3mn8	general	Protein-Ligand	2.7	Ki=0.67uM	Ki	6.17	2010	Drosophila melanogaster carboxypeptidase D variant 1B short, DmCPD1Bs	GEM	D3DME3	C7H14N3O4S	236.269	236.071	29	28	165.91	2.89	-1.6	0	4	5	OC(=O)C[C@@H](C(=O)O)SCC[NH+]=C(N)N	1	C264H89N72O87S4Zn+3	train	Zn
3mna	refined	Protein-Ligand	1.5	Ki=41nM	Ki	7.39	2011	human carbonic anhydrase II	DWH	P00918	C12H13ClN6O4S	372.787	372.041	37	38	157.57	1.61	2.43	3	6	7	COC(=O)CNc1nc(Nc2ccc(cc2)S(=O)(=O)N)nc(n1)Cl	1	C349H105N87O77S2Zn+7	test	Zn
3mnu	general	Protein-Ligand	1.8	Ki=48nM	Ki	7.32	2010	human Carbonic anhydrase 2	BON	P00918	C12H19BN2O4S	298.166	298.116	39	40	99.03	1.2	2.46	2	2	3	CC1(C)OB(OC1(C)C)c1ccc(cc1)NS(=O)(=O)N	1	C291H94N75O64SZn+5	valid	Zn
3moe	general	Protein-Ligand	1.25	Ki=50uM	Ki	4.3	2010	phosphoenolpyruvate carboxykinase (PEPCK),mutation A467G	SPV	P07379	C3H6O6S	170.141	169.989	16	15	140.36	-0.45	-0.14	0	6	1	OC(=O)C(=O)CS(O)(O)O	1	C238H84Mn2N63O60S2+6	test	Mn
3mof	refined	Protein-Ligand	1.75	Ki=860uM	Ki	3.07	2010	phosphoenolpyruvate carboxykinase (PEPCK),mutation A467G	OXL	P07379	C2H2O4	90.035	89.995	8	7	74.6	1.52	-0.84	0	4	0	OC(=O)C(=O)O	1	C192H66Mn2N52O49S2+5	train	Mn
3moh	general	Protein-Ligand	2.1	Ki=1460uM	Ki	2.84	2010	phosphoenolpyruvate carboxykinase (PEPCK),mutation A467G	PGA	P07379	C2H6O6P	157.039	156.99	15	14	120.81	-1.24	-1.26	0	5	1	OC(=O)COP(O)(O)O	1	C216H80Mn2N61O59S4+6	train	Mn
3mtw	general	Protein-Ligand	1.7	Ki=92nM	Ki	7.04	2010	L-Arginine carboxypeptidase Cc2672	M3R	Q9A4Z9	C7H19N4O4P	254.224	254.114	35	34	169.39	0.36	-1.67	1	4	6	OC(=O)[C@@H](NP(O)(O)C)CCC[NH+]=C(N)N	1	C301H120N91O96S3Zn2+9	train	Zn
3muz	refined	Protein-Ligand	1.9	Ki=0.35mM	Ki	3.46	2011	E.Coli (lacZ) beta-galactosidase (R599A)	IPT	P00722	C9H18O5S	238.301	238.087	33	33	115.45	-0.46	-1.07	4	4	7	OC[C@H]1O[C@@H](SC(C)C)[C@@H]([C@H]([C@H]1O)O)O	1	C251H110MgN74O82S7+5	train	Mg
3mv0	refined	Protein-Ligand	2.2	Ki=0.14mM	Ki	3.85	2011	E.Coli (lacZ) beta-galactosidase (R599A)	149	P00722	C6H10O6	178.14	178.048	22	22	107.22	-2.03	-3.01	4	5	5	OC[C@H]1OC(=O)[C@@H]([C@H]([C@H]1O)O)O	1	C233H104MgN67O81S7+4	valid	Mg
3myq	refined	Protein-Ligand	1.35	Kd=30nM	Kd	7.52	2011	Carbonic anhydrase 2	E27	P00918	C18H13ClN4O3S2	432.904	432.012	41	44	152.48	3.2	5.17	2	5	5	O=C(c1ccc(c(c1)S(=O)(=O)N)Cl)CSc1nc2c([nH]1)c1ccccc1nc2	1	C337H103N87O79SZn+6	train	Zn
3mz6	refined	Protein-Ligand	2	Ki=63nM	Ki	7.2	2010	human histone deacetylase 8,HDAC8,mutation D101L	B3N	Q9BY41	C16H23N3O3	305.372	305.174	45	45	78.84	2.16	3.12	1	3	10	O=NC(=O)CCCCCCNC(=O)c1ccc(cc1)N(C)C	1	C246H81FeN66O70S4+4	train	Fe
3mzc	refined	Protein-Ligand	1.5	Ki=226nM	Ki	6.65	2011	Carbonic anhydrase 2	S6I	P00918	C12H17N3O3S	283.347	283.099	36	37	109.67	0.76	3.64	3	3	5	O=C(Nc1ccc(cc1)S(=O)(=O)N)NC1CCCC1	1	C345H97N88O74S2Zn+7	test	Zn
3n0n	refined	Protein-Ligand	1.5	Ki=50nM	Ki	7.3	2011	Carbonic anhydrase 2	P9B	P00918	C13H8F5N3O3S	381.278	381.021	33	34	109.67	1.55	4.6	3	3	5	O=C(Nc1c(F)c(F)c(c(c1F)F)F)Nc1ccc(cc1)S(=O)(=O)N	1	C324H102N82O74SZn+5	train	Zn
3n2c	general	Protein-Ligand	2.81	Ki=7.5uM	Ki	5.12	2010	PROLIDASE	LWY	Q393A1	C6H13NO4P	194.145	194.058	25	25	94.59	0.04	-0.15	0	4	1	OC(=O)[C@@H]1CCCN1P(O)(O)C	1	C244H111N70O72S4Zn2+5	train	Zn
3n2p	refined	Protein-Ligand	1.65	Ki=15nM	Ki	7.82	2011	Carbonic anhydrase 2	AYX	P00918	C13H12N4O5S	336.323	336.053	35	36	155.49	0.88	4.34	3	5	5	O=C(Nc1cccc(c1)N(=O)=O)Nc1ccc(cc1)S(=O)(=O)N	1	C318H98N87O69S2Zn+8	train	Zn
3n2u	refined	Protein-Ligand	1.81	Ki=14.3nM	Ki	7.84	2010	Macrophage metalloelastase(human MMP12)	D3X	P39900	C17H26N2O11S	466.46	466.126	57	58	203.7	-2.38	-1.52	6	8	16	OC[C@H]1O[C@@H](OCCN(S(=O)(=O)c2ccc(cc2)OC)CC(=O)NO)[C@@H]([C@H]([C@@H]1O)O)O	1	C288H93CaN70O77SZn+6	valid	ZnCa
3n2v	refined	Protein-Ligand	1.55	Ki=31nM	Ki	7.51	2010	Macrophage metalloelastase(human MMP12)	JT5	P39900	C16H18N2O5S	350.39	350.094	42	43	115.32	0.87	2.31	3	5	10	OCCN(S(=O)(=O)c1ccc(cc1)c1ccccc1)CC(=O)NO	1	C291H96CaN70O73SZn+7	train	ZnCa
3n35	refined	Protein-Ligand	2	Kd=431uM	Kd	3.37	2011	Lectin	A2G	P16404	C8H15NO6	221.208	221.09	30	30	119.25	-2.59	-2.69	5	5	7	OC[C@H]1O[C@H](O)[C@@H]([C@H]([C@H]1O)O)NC(=O)C	1	C174H56CaN49O60+	train	Ca
3n3j	refined	Protein-Ligand	1.5	Ki=3.3nM	Ki	8.48	2011	Carbonic anhydrase 2	WWV	P00918	C16H19N3O3S	333.405	333.115	42	43	109.67	2.18	5.03	3	3	6	O=C(Nc1ccccc1C(C)C)Nc1ccc(cc1)S(=O)(=O)N	1	C300H99N75O74SZn+5	train	Zn
3n4b	refined	Protein-Ligand	1.6	Ki=96nM	Ki	7.02	2011	Carbonic anhydrase 2	WWZ	P00918	C13H12FN3O3S	309.316	309.058	33	34	109.67	1.15	4.04	3	3	5	O=C(Nc1ccc(cc1)F)Nc1ccc(cc1)S(=O)(=O)N	1	C323H102N82O72SZn+5	test	Zn
3n9r	refined	Protein-Ligand	1.8	Ki=70nM	Ki	7.15	2010	Fructose-bisphosphate aldolase(Class II Fba from h. pylori)	TD3	D0IR47	C6H15NO7P	244.16	244.059	30	29	144.28	-2.65	-1.35	2	6	9	OCCCCN(C(=O)COP(O)(O)O)O	1	C284H109N82O84S3Zn+9	train	Zn
3n9s	refined	Protein-Ligand	1.85	Kd=5.5uM	Kd	5.26	2010	Fructose-bisphosphate aldolase(Class II Fba from h. pylori)	TD4	D0IR47	C6H17NO10P2	325.147	325.033	36	35	207.56	-3.91	-1.67	1	8	9	ON(C(=O)COP(O)(O)O)CCCCOP(O)(O)O	1	C318H120N88O91S3Zn+9	train	Zn
3nb5	refined	Protein-Ligand	1.8	Ki=18nM	Ki	7.74	2011	Carbonic anhydrase 2, CA2	R21	P00918	C16H17ClN2O4S	368.835	368.06	41	42	117.87	1.93	3.77	3	4	8	O=C(Cc1ccc(c(c1)Cl)O)NCCc1ccc(cc1)S(=O)(=O)N	1	C331H102N84O75SZn+5	train	Zn
3nf3	general	Protein-Ligand	2.4	Ki=638.1nM	Ki	6.2	2010	Botulinum neurotoxin(BoNT/A LC)	8-mer	Q7B8V4	C39H71N14O7S	880.136	879.535	132	132	402.65	2.66	-1.42	8	7	34	CSCC[C@@H](C(=O)N[C@H](C(=O)N)CC(C)C)NC(=O)[C@@H](NC(=O)C(NC(=O)[C@@H](NC(=O)[C@@H](NC(=O)[C@H](CCC[NH+]=C(N)N)[NH3+])CCC[NH+]=C(N)N)Cc1ccccc1)(C)C)C	1	C374H128N89O110SZn+9	train	Zn
3ni5	refined	Protein-Ligand	2.1	Ki=28nM	Ki	7.55	2011	Carbonic anhydrase 2, CA2	C1H	P00918	C13H15N5O9S3	481.481	481.003	45	46	258.46	0.96	3.59	2	9	11	O=N(=O)OCCCCOC(=O)c1cccc(c1)S(=O)(=O)Nc1nnc(s1)S(=O)(=O)N	1	C337H107N86O75S2Zn+7	test	Zn
3nif	general	Protein-Ligand	2.4	IC50=8uM	IC50	5.1	2010	Integrin alphaIIB beta3	NIF	P08514 P05106	C11H16N5OS	266.343	266.108	34	36	95.35	0.37	0.73	1	1	2	CCc1nn2c(s1)nc(cc2=O)N1CC[NH2+]CC1	1	C231H65CaMgN56O69+5	valid	MgCa
3nin	general	Protein-Ligand	2.1	Kd=12.4uM	Kd	4.91	2010	E3 ubiquitin-protein ligase UBR1(UBR box)	5-mer	P19812	C19H37N7O7	475.54	475.275	70	69	255.55	-0.12	-2.61	4	7	17	CC(C[C@@H](C(=O)NCC(=O)N[C@H](C(=O)O)CCC(=O)O)NC(=O)[C@H](CCC[NH+]=C(N)N)[NH3+])C	1	C208H75N59O67S9Zn+6	valid	Zn
3njy	general	Protein-Ligand	2.6	IC50=1.7uM	IC50	5.77	2010	Lysine-specific demethylase 4A(JMJD2A)	8XQ	O75164	C10H7NO3	189.167	189.043	21	22	70.42	2.45	1.64	1	4	1	OC(=O)c1ccc(c2c1cccn2)O	1	C261H102N66NiO82S+4	train	XX
3nw9	general	Protein-Ligand	1.65	Ki=1nM	Ki	9	2011	Catechol O-methyltransferase, COMT	637	P22734	C26H24FN5O6	521.497	521.171	62	66	162.85	1.79	2.35	5	8	11	O[C@@H]1[C@@H](/C=C/CNC(=O)c2cc(cc(c2O)O)c2ccc(cc2)F)O[C@H]([C@@H]1O)n1cnc2c1ncnc2C	1	C299H101MgN75O95S8+5	valid	Mg
3nwb	general	Protein-Ligand	1.3	IC50=11nM	IC50	7.96	2011	Catechol O-methyltransferase (COMT)	659	P22734	C26H24F2N6O5	538.503	538.178	63	67	154.65	2.74	3.13	5	7	11	CNc1ncnc2c1ncn2[C@@H]1O[C@@H]([C@@H]([C@H]1O)F)/C=C/CNC(=O)c1cc(cc(c1O)O)c1ccc(cc1)F	1	C300H100MgN77O92S7+5	train	Mg
3nwe	general	Protein-Ligand	1.5	IC50=25nM	IC50	7.6	2011	Catechol O-methyltransferase (COMT)	662	P22734	C29H31FN6O5	562.592	562.234	72	76	154.65	4.02	4.21	5	7	13	CCCNc1ncnc2c1ncn2[C@@H]1O[C@@H]([C@@H]([C@H]1O)C)/C=C/CNC(=O)c1cc(cc(c1O)O)c1ccc(cc1)F	1	C310H107MgN81O100S8+6	valid	Mg
3nx7	refined	Protein-Ligand	1.8	Kd=7.88nM	Kd	8.1	2010	catalytic domain of human MMP12	NHK	P39900	C11H16N2O6S	304.32	304.073	36	36	124.55	-0.79	0.66	3	5	10	OCCN(S(=O)(=O)c1ccc(cc1)OC)CC(=O)NO	1	C257H83CaN61O65SZn+5	train	ZnCa
3nxq	refined	Protein-Ligand	1.99	Ki=7nM	Ki	8.15	2010	Angiotensin Converting Enzyme N domain glycsoylation mutant (Ndom389)	RX4	P12821	C21H32N4O8P	499.475	499.196	66	66	221.74	-0.27	0.98	4	8	15	OC(=O)C[C@@H](C(=O)N[C@H](P(C[C@H](C(=O)N[C@H](C(=O)N)C)C)(O)O)Cc1ccccc1)NC(=O)C	1	C405H143N106O104S2Zn+10	train	Zn
3nzk	refined	Protein-Ligand	1.8	Ki=0.54nM	Ki	9.27	2011	UDP-3-O-[3-hydroxymyristoyl] N-acetylglucosamine deacetylase, LpxC	C90	A1JJJ9	C24H28N3O5	438.496	438.203	60	62	112.33	1.32	1.84	5	4	11	ONC(=O)[C@H]([C@H](O)C)NC(=O)c1ccc(cc1)C#Cc1ccc(cc1)C[NH+]1CCOCC1	1	C333H113N87O95S6Zn+7	train	Zn
3o0j	general	Protein-Ligand	1.95	Ki=65nM	Ki	7.19	2011	cAMP-specific 3',5'-cyclic phosphodiesterase 4B	3OJ	Q07343	C15H9BN2O3	276.055	276.071	30	32	86.27	1.9	1.44	1	3	3	N#Cc1cc(ccc1C#N)Oc1ccc2c(c1)COB2O	1	C319H120MgN88O88S4Zn+8	train	ZnMg
3o3j	general	Protein-Ligand	3	Ki=400nM	Ki	6.4	2011	Peptide deformylase 1B (PDF1B)	BB4	Q9FUZ2	C10H9BrN2O2	269.095	267.985	24	25	65.12	1.46	2.37	3	2	4	ONC(=O)Cc1c[nH]c2c1cc(Br)cc2	1	C226H74N57O61S3Zn+4	train	Zn
3o56	refined	Protein-Ligand	2.42	Kd=794pM	Kd	9.1	2011	cAMP-specific 3',5'-cyclic phosphodiesterase 4B, PDE4B	ZG1	Q07343	C21H27N7O3	425.484	425.218	58	62	111.2	1.33	2.27	1	5	7	CCn1ncc2c1ncc(c2NC1CCOCC1)c1onc(n1)CC(=O)N1CCCC1	1	C359H123MgN98O102S5Zn+7	train	ZnMg
3o57	general	Protein-Ligand	2	IC50=79.4pM	IC50	10.1	2011	cAMP-specific 3',5'-cyclic phosphodiesterase 4B, PDE4B	ZG2	Q07343	C29H34N6O3	514.619	514.269	72	77	98.31	3.48	4.46	1	4	9	CCn1ncc2c1ncc(c2NC1CCOCC1)c1nc(c(o1)Cc1ccccc1)CC(=O)N1CCCC1	1	C407H140MgN104O117S5Zn+7	valid	ZnMg
3o64	general	Protein-Ligand	1.88	Ki=0.4nM	Ki	9.4	2011	TACE	786	P78536	C24H30N6O6S2	562.662	562.167	68	71	203.37	0.64	2.52	4	8	13	CNc1nc(c(s1)S(=O)(=O)C)[C@H]1CCCN1C(=O)[C@@H]([C@H](C(=O)N[C@@H](c1ccc(cc1)n1cccn1)C)O)O	1	C317H105N86O99S4Zn+10	train	Zn
3o7u	refined	Protein-Ligand	1.71	Ki=52nM	Ki	7.28	2011	Cytosine deaminase, CDA	O7U	P25524	C3H6N3O2P	147.072	147.02	15	15	94.03	-2.25	1.28	3	2	0	O=C1NC=C[P@](=O)(N1)N	1	C253H105N70O70SZn+6	train	Zn
3ocz	refined	Protein-Ligand	1.35	Ki=35nM	Ki	7.46	2011	Lipoprotein E, rP4	SRA	P26093	C10H15N5O6PS	364.295	364.048	38	40	221.39	-2.66	-0.78	3	7	7	O[C@@H]1[C@H](O)[C@H](O[C@H]1n1cnc2c1ncnc2N)COP(S)(O)O	1	C384H132MgN99O114S+8	valid	Mg
3oe4	refined	Protein-Ligand	1.49	Ki=34nM	Ki	7.47	2011	Catechol O-methyltransferase, COMT	610	P22734	C19H18N6O8	458.382	458.119	51	54	208.67	-0.5	0.67	5	10	10	O[C@@H]1[C@@H](/C=C/CNC(=O)c2cc(cc(c2O)O)N(=O)=O)O[C@H]([C@@H]1O)n1cnc2c1ncnc2	1	C293H95MgN72O91S5+3	test	Mg
3oe5	refined	Protein-Ligand	1.52	Ki=132nM	Ki	6.88	2011	Catechol O-methyltransferase, COMT	611	P22734	C19H19N3O8S	449.434	449.089	50	52	203.26	0.9	1.84	5	8	11	O[C@@H]1[C@@H](/C=C/CNC(=O)c2cc(cc(c2O)O)N(=O)=O)O[C@H]([C@@H]1O)Sc1ccncc1	1	C302H100MgN74O94S5+3	train	Mg
3ohi	refined	Protein-Ligand	2.3	Ki=14uM	Ki	4.85	2011	Putative fructose-1,6-bisphosphate aldolase, GlFBPA	HDX	O97447	C8H15NO9P2	331.154	331.022	35	35	200.02	-3.78	-1.54	1	8	5	O=c1n(ccc(c1O)CCOP(O)(O)O)CP(O)(O)O	1	C242H94N76O79S3Zn+8	valid	Zn
3oik	general	Protein-Ligand	1.5	Ki=680nM	Ki	6.17	2011	Carbonic anhydrase 2(A65S, N67Q mutant)	WZB	P00918	C20H30N2O6S2	458.592	458.155	60	63	155.54	3.36	5.84	2	4	5	CCc1cc2c(cc1OS(=O)(=O)N)CC[C@@H]1[C@@H]2CC[C@]2([C@H]1CC[C@@H]2OS(=O)(=O)N)C	1	C360H107N91O83SZn+6	valid	Zn
3oil	refined	Protein-Ligand	1.5	Ki=2100nM	Ki	5.68	2011	Carbonic anhydrase 2(A65S, N67Q mutant)	VZ5	P00918	C20H29NO4S	379.514	379.182	55	58	98	3.92	4.83	2	3	4	CCc1cc2[C@H]3CC[C@]4([C@H]([C@@H]3CCc2cc1OS(=O)(=O)N)CC[C@@H]4O)C	1	C357H106N89O80S2Zn+5	test	Zn
3oim	refined	Protein-Ligand	1.45	Ki=180nM	Ki	6.74	2011	Carbonic anhydrase 2	VZ5	P00918	C20H29NO4S	379.514	379.182	55	58	98	3.92	4.83	2	3	4	CCc1cc2[C@H]3CC[C@]4([C@H]([C@@H]3CCc2cc1OS(=O)(=O)N)CC[C@@H]4O)C	1	C286H90N74O60SZn+5	valid	Zn
3oku	refined	Protein-Ligand	1.45	Ki=440nM	Ki	6.36	2011	Carbonic anhydrase 2	VZ4	P00918	C20H27NO4S	377.498	377.166	53	56	94.84	3.61	5.04	1	3	3	CCc1cc2c(cc1OS(=O)(=O)N)CC[C@@H]1[C@@H]2CC[C@]2([C@H]1CCC2=O)C	1	C334H100N85O71SZn+6	train	Zn
3okv	general	Protein-Ligand	1.45	Ki=590nM	Ki	6.23	2011	Carbonic anhydrase 2(A65S, N67Q mutant)	VZ4	P00918	C20H27NO4S	377.498	377.166	53	56	94.84	3.61	5.04	1	3	3	CCc1cc2c(cc1OS(=O)(=O)N)CC[C@@H]1[C@@H]2CC[C@]2([C@H]1CCC2=O)C	1	C327H97N88O74S2Zn+7	test	Zn
3orn	general	Protein-Ligand	2.8	Kd=0.24nM	Kd	9.62	2011	Dual specificity mitogen-activated protein kinase kinase 1, MEK1	3OR	Q02750	C20H19F3IN3O5	565.282	565.032	51	53	100.13	3.01	3.56	3	3	10	OCCONC(=O)c1cc(CN2OCCCC2=O)c(c(c1Nc1ccc(cc1F)I)F)F	1	C324H113MgN83O93S7+5	test	Mg
3os3	general	Protein-Ligand	2.8	IC50=235nM	IC50	6.63	2011	Dual specificity mitogen-activated protein kinase kinase 1, MEK1	3OS	Q02750	C20H21F3N3O5	440.393	440.143	52	53	116.66	1.93	0.93	5	3	15	OCCONC(=O)c1cc(C[NH2+]OCCO)c(c(c1Nc1ccc(cc1F)C#C)F)F	1	C358H113MgN92O96S7+7	train	Mg
3ouh	general	Protein-Ligand	2.51	IC50=79nM	IC50	7.1	2010	Egl nine homolog 1,PHD2	014	Q9GZT9	C11H6ClFN4O2	280.642	280.016	25	27	83.8	3.13	2.24	1	4	1	OC(=O)c1cnn(c1)c1[nH]c2c(n1)cc(c(c2)F)Cl	1	C273H104FeN69O73S2+6	train	Fe
3oui	general	Protein-Ligand	1.7	IC50=12.6uM	IC50	4.9	2010	Egl nine homolog 1,PHD2	42Z	Q9GZT9	C10H7Cl2N3O3	288.087	286.986	25	26	95.08	2.83	2.08	2	4	3	OC(=O)CNC(=O)c1[nH]c2c(n1)cc(c(c2)Cl)Cl	1	C255H88FeN63O65S3+5	train	Fe
3ouj	refined	Protein-Ligand	2.3	Kd=900nM	Kd	6.05	2010	human Hypoxia-Inducible Factor Prolyl Hydroxylase (PHD2)	AKG	Q9GZT9	C5H6O5	146.098	146.022	16	15	91.67	1.43	-0.5	0	5	2	OC(=O)CCC(=O)C(=O)O	1	C252H99FeN65O63S4+7	test	Fe
3oy0	refined	Protein-Ligand	1.6	Ki=10.1nM	Ki	8	2011	Carbonic anhydrase 2, CA2	OY0	P00918	C15H24N2O3S	312.428	312.151	45	45	97.64	2.79	4.59	2	3	7	CCC[C@@H](C(C)(C)C)C(=O)Nc1ccc(cc1)S(=O)(=O)N	1	C315H104N76O72S2Zn+5	valid	Zn
3oyl	general	Protein-Ligand	2.54	IC50=200nM	IC50	6.7	2010	Prototype Foamy Virus (PFV) intasome S217H mutant	ZZX	P14350	C21H21ClFN5O4	461.874	461.127	53	56	109.46	2.35	2.47	2	4	6	CCN1C[C@H](C)n2c(C1=O)c(O)c1c2c(nn(c1=O)Cc1ccc(c(c1)Cl)F)C(=O)NC	1	C211H76Mg2N65O61+7	valid	Mg
3oyn	general	Protein-Ligand	2.68	IC50=25nM	IC50	7.6	2010	Prototype Foamy Virus (PFV) intasome N224H mutant	ZZX	P14350	C21H21ClFN5O4	461.874	461.127	53	56	109.46	2.35	2.47	2	4	6	CCN1C[C@H](C)n2c(C1=O)c(O)c1c2c(nn(c1=O)Cc1ccc(c(c1)Cl)F)C(=O)NC	1	C193H72Mg2N56O58+5	train	Mg
3oyq	refined	Protein-Ligand	1.47	Ki=10.3nM	Ki	7.99	2011	Carbonic anhydrase 2, CA2	OYQ	P00918	C13H20N2O3S	284.375	284.119	39	39	97.64	1.83	3.95	2	3	7	CC[C@@H](CCC(=O)Nc1ccc(cc1)S(=O)(=O)N)C	1	C340H102N85O78SZn+5	train	Zn
3oys	general	Protein-Ligand	1.54	Ki=9nM	Ki	8.05	2011	Carbonic anhydrase 2, CA2	OYS	P00918	C14H14N2O3S	290.338	290.073	34	35	97.64	1.26	3.37	2	3	5	O=C(Cc1ccccc1)Nc1ccc(cc1)S(=O)(=O)N	1	C298H91N76O66SZn+6	train	Zn
3ozg	refined	Protein-Ligand	1.99	Ki=0.65nM	Ki	9.19	2011	Hypoxanthine-guanine-xanthine phosphoribosyltransferase	SSI	P20035	C11H19N4O5P	318.266	318.109	40	41	172.66	-5.33	-2.19	4	5	7	OC[C@@H]([NH2+]Cc1c[nH]c2c1nc[nH]c2=O)CCP(O)(O)O	1	C365H121MgN88O99S5+9	train	Mg
3ozr	refined	Protein-Ligand	1.73	Ki=7022nM	Ki	5.15	2011	Catechol O-methyltransferase, COMT	OZR	P22734	C14H16N2O8	340.285	340.091	40	41	165.07	-0.4	0.33	5	7	9	O[C@H]1CO[C@@H]([C@H]1O)/C=C/CNC(=O)c1cc(cc(c1O)O)N(=O)=O	1	C283H100MgN70O85S5+4	valid	Mg
3ozs	refined	Protein-Ligand	1.44	Ki=4645nM	Ki	5.33	2011	Catechol O-methyltransferase, COMT	OZS	P22734	C18H17F3N4O8	474.345	474.1	50	52	182.89	0.38	1.74	5	8	10	O[C@@H]1[C@@H](/C=C/CNC(=O)c2cc(cc(c2O)O)N(=O)=O)O[C@H]([C@@H]1O)n1cnc(c1)C(F)(F)F	1	C250H86MgN62O77S5+4	train	Mg
3ozt	refined	Protein-Ligand	1.48	Ki=74.9uM	Ki	4.13	2011	Catechol O-methyltransferase, COMT	OZZ	P22734	C19H19N3O9	433.369	433.112	50	52	187.07	-0.18	0.69	5	8	10	O[C@@H]1[C@@H](/C=C/CNC(=O)c2cc(cc(c2O)O)N(=O)=O)O[C@H]([C@@H]1O)n1ccc(=O)cc1	1	C291H97MgN72O92S5+3	train	Mg
3p23	general	Protein-Ligand	2.7	IC50=38uM	IC50	4.42	2011	Serine/threonine-protein kinase/endoribonuclease IRE1	ADP	O75460	C10H17N5O10P2	429.217	429.045	44	46	266.1	-4.89	-2.04	3	10	7	O[C@@H]1[C@@H](COP(OP(O)(O)O)(O)O)O[C@H]([C@@H]1O)n1cnc2c1ncnc2N	1	C257H93MgN66O73S2+5	valid	Mg
3p3g	refined	Protein-Ligand	1.65	Ki=180pM	Ki	9.74	2011	UDP-3-O-[3-hydroxymyristoyl] N-acetylglucosamine deacetylase, LpxC	3P3		C21H16N2O4	360.363	360.111	43	44	95.83	2.72	2.25	2	4	7	C[C@H]([C@@H](C(=O)N=O)NC(=O)c1ccc(cc1)C#CC#Cc1ccccc1)O	1	C267H103N71O79S5Zn+5	train	Zn
3p4v	refined	Protein-Ligand	2	Ki=8uM	Ki	5.1	2011	Carbonic anhydrase 2, CA2	PMX	P00918	C14H14ClNO6	327.717	327.051	36	36	112.93	2.38	1.28	2	5	8	COC(=O)/C=C/C(=O)N[C@H](C(=O)O)Cc1ccc(c(c1)Cl)O	1	C320H96N85O80SZn+6	train	Zn
3p58	refined	Protein-Ligand	1.49	Ki=25.4nM	Ki	7.6	2011	Carbonic anhydrase 2, CA2	P58	P00918	C9H11NS2	197.32	197.033	23	23	74.13	2.4	2.33	0	0	4	CN(C(=S)S)Cc1ccccc1	1	C267H90N66O61SZn+4	train	Zn
3p5l	refined	Protein-Ligand	1.5	Ki=40.8nM	Ki	7.39	2011	Carbonic anhydrase 2, CA2	IT5	P00918	C13H14N2S2	262.394	262.06	31	32	97.92	2.6	2.7	0	1	3	N#CC1(CCN(CC1)C(=S)S)c1ccccc1	1	C306H95N77O65SZn+6	train	Zn
3p76	general	Protein-Ligand	1.93	IC50=2.1nM	IC50	8.68	2011	UDP-3-O-[3-hydroxymyristoyl] N-acetylglucosamine deacetylase, LpxC	P76	O67648	C24H27N3O4	421.489	421.2	58	60	101.9	2.45	2.95	4	4	10	ONC(=O)[C@H]([C@H](O)C)NC(=O)N1CC[C@H](CC1)c1ccc(cc1)C#Cc1ccccc1	1	C357H122N98O102Zn2+13	valid	Zn
3pb7	refined	Protein-Ligand	1.4	Ki=1.817uM	Ki	5.74	2011	Glutaminyl-peptide cyclotransferase-like protein（gQC）	PBD	Q9NXS2	C15H20N4O2S	320.41	320.131	42	43	92.43	1.55	2.74	2	1	9	COc1cc(ccc1OC)NC(=S)NCCCn1cncc1	1	C243H93N58O71Zn+3	train	Zn
3pb8	refined	Protein-Ligand	1.13	Ki=5.748uM	Ki	5.24	2011	Glutaminyl-peptide cyclotransferase-like protein（gQC）	AHN	Q9NXS2	C7H11N3O	153.182	153.09	22	22	57.78	-0.33	0.48	2	2	4	CC(=O)NCCc1c[nH]cn1	1	C231H94N60O78SZn+3	valid	Zn
3pb9	refined	Protein-Ligand	1.12	Ki=0.262uM	Ki	6.58	2011	Glutaminyl-peptide cyclotransferase-like protein（gQC）	1BN	Q9NXS2	C10H10N2	158.2	158.084	22	23	17.82	1.61	1.93	0	1	2	c1ccc(cc1)Cn1cncc1	1	C202H80N49O62Zn+2	test	Zn
3pbb	refined	Protein-Ligand	1.95	Ki=0.095uM	Ki	7.02	2011	Glutaminyl-peptide cyclotransferase（sQC）	PBD	Q16769	C15H20N4O2S	320.41	320.131	42	43	99.47	1.98	2.89	1	1	9	COc1cc(ccc1OC)/N=C(\NCCCn1cncc1)/S	1	C267H100N61O78Zn+3	train	Zn
3pcb	general	Protein-Ligand	2.19	Ki=4mM	Ki	2.4	1998	protocatechuate 3,4-dioxygenase	3HB	P00436 P00437	C7H6O3	138.121	138.032	16	16	57.53	2.18	1.09	1	3	1	Oc1cccc(c1)C(=O)O	1	C245H89FeN69O66S2+7	train	Fe
3pcc	general	Protein-Ligand	1.98	Ki=240uM	Ki	3.62	1998	protocatechuate 3,4-dioxygenase	PHB	P00436 P00437	C7H6O3	138.121	138.032	16	16	57.53	2.18	1.09	1	3	1	Oc1ccc(cc1)C(=O)O	1	C224H86FeN65O61S2+7	valid	Fe
3pce	refined	Protein-Ligand	2.06	Ki=10mM	Ki	2	1998	protocatechuate 3,4-dioxygenase	3HP	P00436 P00437	C8H8O3	152.147	152.047	19	19	57.53	2.47	1.02	1	3	2	OC(=O)Cc1cccc(c1)O	1	C244H89FeN70O66S2+7	train	Fe
3pcf	refined	Protein-Ligand	2.15	Ki=0.9uM	Ki	6.05	1998	protocatechuate 3,4-dioxygenase	FHB	P00436 P00437	C7H5FO3	156.111	156.022	16	16	57.53	2.28	1.23	1	3	1	OC(=O)c1ccc(c(c1)F)O	1	C240H86FeN72O65S2+8	test	Fe
3pcg	refined	Protein-Ligand	1.96	Ki=5mM	Ki	2.3	1998	protocatechuate 3,4-dioxygenase	4HP	P00436 P00437	C8H8O3	152.147	152.047	19	19	57.53	2.47	1.02	1	3	2	OC(=O)Cc1ccc(cc1)O	1	C244H89FeN70O66S2+7	test	Fe
3pch	general	Protein-Ligand	2.05	Ki=4uM	Ki	5.4	1998	protocatechuate 3,4-dioxygenase	CHB	P00436 P00437	C7H5ClO3	172.566	171.993	16	16	57.53	2.8	1.74	1	3	1	OC(=O)c1ccc(c(c1)Cl)O	1	C251H91FeN74O69S2+8	valid	Fe
3pcj	refined	Protein-Ligand	2.13	Kd=0.06uM	Kd	7.22	1998	protocatechuate 3,4-dioxygenase	INO	P00436 P00437	C6H5NO4	155.108	155.022	16	16	79.53	0.06	-0.22	1	4	1	OC(=O)c1ccn(c(=O)c1)O	1	C268H89FeN80O70S2+8	train	Fe
3pck	refined	Protein-Ligand	2.13	Kd=0.2uM	Kd	6.7	1998	protocatechuate 3,4-dioxygenase	NNO	P00436 P00437	C6H5NO4	155.108	155.022	16	16	79.53	0.06	-0.22	1	4	1	OC(=O)c1ccc(=O)n(c1)O	1	C250H90FeN70O67S2+7	train	Fe
3pcn	refined	Protein-Ligand	2.4	Kd=220uM	Kd	3.66	1998	protocatechuate 3,4-dioxygenase	DHY	P00436 P00437	C8H8O4	168.147	168.042	20	20	77.76	2.12	0.72	2	4	3	OC(=O)Cc1ccc(c(c1)O)O	1	C266H99FeN79O73S2+8	train	Fe
3pdq	general	Protein-Ligand	1.99	IC50=180nM	IC50	6.74	2011	Lysine-specific demethylase 4A, JMJD2A	KC6	O75164	C14H15N4O3	287.294	287.114	36	37	119.82	-1.85	0.2	2	5	5	[NH3+]CCNC(=O)c1ccnc(c1)c1nccc(c1)C(=O)O	1	C363H121N86NiO103S4+5	train	XX
3pfp	refined	Protein-Ligand	2.35	Ki=360nM	Ki	6.44	2011	Probable 3-deoxy-D-arabino-heptulosonate 7-phosphate synthase AroG	035-036	O53512	C7H18O10P2	324.159	324.038	37	36	204.32	-1.72	-0.66	0	8	7	OC(=O)[C@H](OP(O)(O)O)CCCCCOP(O)(O)O	1	C243H104MnN85O74S3+13	train	Mn
3pka	general	Protein-Ligand	1.25	IC50=540nM	IC50	6.27	2011	Methionine aminopeptidase; MtMetAP1c	Y02	P9WK19	C23H37NO6	423.543	423.262	67	67	108.25	2.52	2.2	4	4	15	CO[C@H]([C@@H]([C@H]([C@@H](/C=C/C(C)(C)C)O)O)O)C(=O)NCCOc1c(C)cc(cc1C)C	1	C389H120Mn2N102O113S4+7	train	Mn
3pkb	general	Protein-Ligand	1.25	IC50=620nM	IC50	6.21	2011	Methionine aminopeptidase, MtMetAP1c	Y16	P9WK19	C14H26N2O6	318.366	318.179	48	47	142.11	-1.3	-0.62	5	5	13	CO[C@H]([C@@H]([C@H]([C@@H](/C=C/C(C)(C)C)O)O)O)C(=O)NCC(=O)N	1	C356H112Mn2N93O102S4+7	test	Mn
3pkc	general	Protein-Ligand	1.47	IC50=960nM	IC50	6.02	2011	Methionine aminopeptidase, MtMetAP1c	Y08	P9WK19	C22H38N2O6	426.547	426.273	68	69	119.33	0.46	0.78	4	5	15	CO[C@H]([C@@H]([C@H]([C@@H](/C=C/C(C)(C)C)O)O)O)C(=O)NC[C@@H]1CCCN(C1)C(=O)C1CC1	1	C360H113Mn2N97O107S4+7	train	Mn
3pkd	general	Protein-Ligand	1.47	IC50=760nM	IC50	6.12	2011	Methionine aminopeptidase, MtMetAP1c	Y10	P9WK19	C21H31NO5	377.475	377.22	58	59	99.02	2.36	1.36	4	4	12	CO[C@H]([C@@H]([C@H]([C@@H](/C=C/C(C)(C)C)O)O)O)C(=O)NC1Cc2c(C1)cccc2	1	C343H110Mn2N92O100S4+8	test	Mn
3pn4	refined	Protein-Ligand	1.9	Ki=140nM	Ki	6.85	2011	Peptide deformylase 1B, chloroplastic, AtPDF1B	BB2	Q9FUZ2	C19H35N3O5	385.498	385.258	62	62	118.97	1.55	1.92	4	5	16	CCCCC[C@@H](C(=O)N[C@H](C(=O)N1CCC[C@H]1CO)C(C)C)CC(=O)NO	1	C306H89N75O79S4Zn2+6	valid	Zn
3po6	refined	Protein-Ligand	1.47	Ki=87.3nM	Ki	7.06	2011	Carbonic anhydrase 2, CA2	DT9	P00918	C12H18N2O4S	286.347	286.099	37	38	90.24	0.71	2.55	1	2	3	COc1cc2c(cc1OC)CCN([C@H]2C)S(=O)(=O)N	1	C332H101N83O71SZn+5	valid	Zn
3pp1	general	Protein-Ligand	2.7	IC50=3.2nM	IC50	8.49	2011	Dual specificity mitogen-activated protein kinase kinase 1, MEK1	IZG	Q02750	C17H17F2IN4O4	506.243	506.026	45	47	105.47	0.9	-0.16	3	4	7	OC[C@@H](CN1CN=C2C(=C(Nc3ccc(cc3F)I)[C@@H](C(=O)N2C)F)C1=O)O	1	C288H99MgN79O79S5+6	test	Mg
3ps1	refined	Protein-Ligand	1.85	Ki=67pM	Ki	10.17	2011	UDP-3-O-[3-hydroxymyristoyl] N-acetylglucosamine deacetylase, LpxC	ZH2		C21H17N3O4	375.377	375.122	45	46	121.85	2.04	2.42	3	4	7	C[C@H]([C@@H](C(=O)N=O)NC(=O)c1ccc(cc1)C#CC#Cc1ccc(cc1)N)O	1	C269H105N69O82S5Zn+4	valid	Zn
3pz1	general	Protein-Ligand	1.95	IC50=724nM	IC50	6.14	2011	RabGGTase	3PZ	P53612 Q08602	C29H29N5O3S	527.637	527.199	67	71	99.84	3.79	5.21	0	4	7	COc1ccc(cc1)S(=O)(=O)N1Cc2cc(C#N)ccc2N(C[C@H]1Cc1ccccc1)Cc1cncn1C	1	C404H140N96O102S8Zn+5	train	Zn
3pz2	general	Protein-Ligand	2.35	IC50=724nM	IC50	6.14	2011	RabGGTase	3PZ	P53612 Q08602	C29H29N5O3S	527.637	527.199	67	71	99.84	3.79	5.21	0	4	7	COc1ccc(cc1)S(=O)(=O)N1Cc2cc(C#N)ccc2N(C[C@H]1Cc1ccccc1)Cc1cncn1C	1	C399H140N100O103S7Zn+5	valid	Zn
3pz3	general	Protein-Ligand	2	IC50=141nM	IC50	6.85	2011	RabGGTase	PZ3	P53612 Q08602	C41H41N5O7S	747.859	747.273	95	101	147.75	5.03	7.77	2	5	15	COc1ccc(cc1)S(=O)(=O)N1Cc2cc(ccc2N(C[C@H]1Cc1ccc(cc1)OC(=O)NCc1ccccc1)Cc1cncn1C)c1ccc(o1)CO	1	C511H166N138O128S7Zn+10	test	Zn
3pz4	general	Protein-Ligand	2.1	IC50=6nM	IC50	8.22	2011	Protein farnesyltransferase/geranylgeranyltransferase type-1 subunit alpha, FTase	3PZ	Q8K2I1 Q04631	C29H29N5O3S	527.637	527.199	67	71	99.84	3.79	5.21	0	4	7	COc1ccc(cc1)S(=O)(=O)N1Cc2cc(C#N)ccc2N(C[C@H]1Cc1ccccc1)Cc1cncn1C	1	C427H143N112O112S6Zn+9	valid	Zn
3q2a	general	Protein-Ligand	1.99	Ki~5uM	Ki	5.3	2011	Toluene-4-monooxygenase system protein , T4moHD	PAB	Q00456 Q00457 Q00459 Q00460	C7H7NO2	137.136	137.048	17	17	63.32	1.85	1.55	1	2	0	OC(=O)c1ccc(cc1)N	1	C271H109Fe2N63O81S+3	train	Fe
3q2g	general	Protein-Ligand	2.3	IC50=3.5nM	IC50	8.46	2011	A disintegrin and metalloproteinase with thrombospondin motifs 1,ADAM-TS1	QGF	Q9UHI8	C23H29Cl2FN4O5S	563.47	562.122	65	67	121.31	3	5.69	1	6	12	O=CN([C@](CS(=O)(=O)N1CC[C@H](CC1)OCc1ccc(cc1Cl)Cl)(C[C@@H](c1ncc(cn1)F)C)C)O	1	C289H98N78O91S8Zn+6	train	Zn
3q2h	general	Protein-Ligand	2.33	IC50=690pM	IC50	9.16	2011	A disintegrin and metalloproteinase with thrombospondin motifs 1, ADAM-TS1	QHF	Q9UHI8	C23H34FN5O5S	511.61	511.226	69	71	138.11	2.33	4.65	1	7	12	O=CN([C@](CS(=O)(=O)N1CC[C@H](CC1)CCc1c(C)noc1C)(C[C@@H](c1ncc(cn1)F)C)C)O	1	C278H96N75O91S6Zn+6	train	Zn
3q3k	general	Protein-Ligand	2	IC50=7.4nM	IC50	8.13	2011	Activated factor Xa heavy chain	D90	P00742	C23H21ClN5O2S	466.963	466.11	53	57	119.56	3.99	5.07	3	3	6	C[N@@H+]1CCc2c(C1)sc(n2)C(=O)Nc1ccccc1NC(=O)c1[nH]c2c(c1)cc(cc2)Cl	1	C313H113CaN80O96S6+6	train	Ca
3q43	general	Protein-Ligand	1.8	Ki=43nM	Ki	7.37	2011	M1 family aminopeptidase, PfA-M1	D66	O96935	C17H27N2O5	339.407	339.192	51	51	123.5	-0.1	0.22	3	4	10	COc1ccc(cc1)C[C@H]([C@@H](C(=O)N[C@H](C(=O)O)CC(C)C)O)[NH3+]	1	C376H139MgN97O115S4Zn+6	train	ZnMg
3q44	refined	Protein-Ligand	1.8	Ki=490nM	Ki	6.31	2011	M1 family aminopeptidase, PfA-M1	D50	O96935	C23H31N2O5	415.503	415.223	61	62	123.5	1.39	1.79	3	4	12	[NH3+][C@@H]([C@@H](C(=O)N[C@H](C(=O)O)CC(C)C)O)Cc1ccc(cc1)OCc1ccccc1	1	C439H152N117O133S4Zn+7	train	Zn
3q72	general	Protein-Ligand	1.66	Kd=1574nM	Kd	5.8	2011	GTP-binding protein RAD	GNP	P55042	C10H21N6O13P3	526.227	526.038	53	55	353.4	-5.89	-3.69	3	11	9	O[C@@H]1[C@@H](COP(OP(NP(O)(O)O)(O)O)(O)O)O[C@H]([C@@H]1O)n1cnc2c1[nH]c(N)[nH+]c2=O	1	C179H61MgN51O51+4	train	Mg
3q7j	general	Protein-Ligand	2.91	IC50=30uM	IC50	4.52	2011	Tricorn protease-interacting factor F3(E101Q,N261T)	FBO	O93655	C23H29N4O5	441.5	441.214	61	62	141.57	2.26	2.5	3	4	15	O=NC(=O)[C@@H](NC(=O)[C@H](Cc1ccccc1)[NH3+])CCCCNC(=O)OCc1ccccc1	1	C400H133N98O115S2Zn+7	valid	Zn
3q7p	general	Protein-Ligand	2.5	Kd=1574nM	Kd	5.8	2011	GTP-binding protein RAD	GNP	P55042	C10H21N6O13P3	526.227	526.038	53	55	353.4	-5.89	-3.69	3	11	9	O[C@@H]1[C@@H](COP(OP(NP(O)(O)O)(O)O)(O)O)O[C@H]([C@@H]1O)n1cnc2c1[nH]c(N)[nH+]c2=O	1	C179H60MgN50O50+5	train	Mg
3q7q	refined	Protein-Ligand	2.3	Kd=2256nM	Kd	5.65	2011	GTP-binding protein RAD (Q148A)	GNP	P55042	C10H21N6O13P3	526.227	526.038	53	55	353.4	-5.89	-3.69	3	11	9	O[C@@H]1[C@@H](COP(OP(NP(O)(O)O)(O)O)(O)O)O[C@H]([C@@H]1O)n1cnc2c1[nH]c(N)[nH+]c2=O	1	C169H53MgN44O49+3	test	Mg
3q8h	general	Protein-Ligand	1.75	Kd=70uM	Kd	4.15	2011	2-C-methyl-D-erythritol 2,4-cyclodiphosphate synthase	AO9	Q63T71	C15H18N6O5S	394.406	394.106	45	48	189.39	0.99	-0.81	4	4	7	O[C@@H]1[C@@H](CNC(=O)c2c[nH]c3n2ccs3)O[C@H]([C@@H]1O)n1ccc([nH+]c1=O)N	1	C261H92N72O73Zn+7	train	Zn
3qc9	general	Protein-Ligand	2.7	Kd=0.88uM	Kd	6.06	2011	Rhodopsin kinase(T8C, N480C)	ADP	P28327	C10H17N5O10P2	429.217	429.045	44	46	266.1	-4.89	-2.04	3	10	7	O[C@@H]1[C@@H](COP(OP(O)(O)O)(O)O)O[C@H]([C@@H]1O)n1cnc2c1ncnc2N	1	C243H93Mg2N70O69S3+7	train	Mg
3qi3	general	Protein-Ligand	2.3	IC50=164.2uM	IC50	3.78	2011	High affinity cGMP-specific 3',5'-cyclic phosphodiesterase 9A, PDE9A (Q453E mutant)	PDB	O76083	C16H15F3N4O	336.312	336.12	39	41	63.57	3.2	3.16	1	2	3	C[C@@H](C(F)(F)F)Cc1[nH]c(=O)c2c(n1)n(nc2)c1ccccc1C	1	C328H120MgN85O90S8Zn+5	train	ZnMg
3qi4	general	Protein-Ligand	2.5	IC50=117.2uM	IC50	3.93	2011	High affinity cGMP-specific 3',5'-cyclic phosphodiesterase 9A, PDE9A (Q453E mutant)	IBM	O76083	C10H14N4O2	222.244	222.112	30	31	72.68	0.95	0.08	1	3	2	CC(Cn1c(=O)n(C)c(=O)c2c1nc[nH]2)C	1	C240H95MgN66O67S2Zn+5	valid	ZnMg
3qin	general	Protein-Ligand	1.7	Kd=136nM	Kd	6.87	2011	HIV-1 RNase H p15 with engineered E. coli loop	P1Y	P0A7Y4 P04585	C13H11BrN2O5	355.141	353.985	32	33	112.77	3.64	1.95	2	6	5	COc1ccc(cc1Br)Cc1nc(O)c(c(n1)C(=O)O)O	1	C186H72Mn2N55O61+6	train	Mn
3qio	general	Protein-Ligand	1.4	Kd=144nM	Kd	6.84	2011	HIV-1 RNase H p15 with engineered E. coli loop	QID	P0A7Y4 P04585	C14H9N2O5S	317.297	317.023	31	33	118.12	0.58	3.16	1	5	2	O=[N]1C(=O)Nc2c(C1=O)cc(cc2)S(=O)(=O)c1ccccc1	1	C198H68Mn2N60O64+7	test	Mn
3qip	general	Protein-Ligand	2.09	Kd=129nM	Kd	6.89	2011	HIV-1 reverse transcriptase	P4Y	P04585	C20H15N3O4	361.351	361.106	42	45	119.33	4.77	3.33	3	6	5	Oc1nc(nc(c1O)C(=O)O)Cc1c([nH]c2c1cccc2)c1ccccc1	1	C219H79Mn2N62O66+5	train	Mn
3qiy	general	Protein-Ligand	2.3	Ki=4.6uM	Ki	5.34	2011	Botulinum neurotoxin type A	QI1	P0DPI1	C18H21Cl2N2O2	368.278	367.098	45	46	53.77	3.62	3.26	2	2	10	ONC(=O)CCC[NH+](Cc1ccc(cc1)Cl)Cc1ccc(cc1)Cl	1	C316H109N79O92SZn+10	valid	Zn
3qiz	general	Protein-Ligand	2	Ki=6.1uM	Ki	5.21	2011	Botulinum neurotoxin type A	QI2	P0DPI1	C24H31F2N2O3	433.511	433.23	62	63	60.17	4.5	3.8	0	2	12	O=NC(=O)[C@H](C[C@H](c1ccc(cc1)F)OC)CC[N@H+](CCCc1ccc(c(c1)C)F)C	1	C362H129N101O101SZn+11	train	Zn
3qj0	general	Protein-Ligand	2.3	Ki=6.3uM	Ki	5.2	2011	Botulinum neurotoxin type A	QI3	P0DPI1	C17H14Cl2N2O5S	429.274	428	41	43	101.49	3.55	4.52	0	4	5	O=NC(=O)[C@@H]1C[C@H](CN1S(=O)(=O)c1ccc(cc1)Cl)Oc1ccc(cc1)Cl	1	C294H101N71O80SZn+9	test	Zn
3qlm	refined	Protein-Ligand	2.5	Kd=0.431uM	Kd	6.37	2011	Phospholipase A2	PLM	P00592	C16H32O2	256.424	256.24	50	49	37.3	8.56	5.55	0	2	13	CCCCCCCCCCCCCCCC(=O)O	1	C246H78CaN67O70S8+7	train	Ca
3qpn	general	Protein-Ligand	2	IC50=17nM	IC50	7.77	2011	cAMP and cAMP-inhibited cGMP 3',5'-cyclic phosphodiesterase 10A, PDE10	PFK	Q9QYJ6	C20H17N3O2	331.368	331.132	42	45	57.13	3.74	3.81	0	3	5	COc1cc2cncnc2cc1OCCc1ccc2c(n1)cccc2	1	C295H102MgN76O82S3Zn+5	valid	ZnMg
3qpo	general	Protein-Ligand	1.8	IC50=247nM	IC50	6.61	2011	cAMP and cAMP-inhibited cGMP 3',5'-cyclic phosphodiesterase 10A, PDE10	PFR	Q9QYJ6	C27H28N4O2	440.537	440.221	61	65	60.37	5.1	5.1	0	3	7	COc1cc2ncnc(c2cc1OCCc1ccccn1)N1CCC[C@H](C1)c1ccccc1	1	C331H117MgN86O96S3Zn+5	valid	ZnMg
3qpp	general	Protein-Ligand	1.8	IC50=12nM	IC50	7.92	2011	cAMP and cAMP-inhibited cGMP 3',5'-cyclic phosphodiesterase 10A, PDE10	PFW	Q9QYJ6	C31H30N4O2	490.596	490.237	67	72	60.37	6.44	6.26	0	3	7	COc1cc2ncnc(c2cc1OCCc1ccc2c(n1)cccc2)N1CCC[C@H](C1)c1ccccc1	1	C329H116MgN84O98S3Zn+5	test	ZnMg
3qw5	refined	Protein-Ligand	1.6	Ki=358nM	Ki	6.45	2012	Botulinum neurotoxin type A	5-mer	P0DPI1	C23H42N11O4	536.651	536.342	80	80	290.05	0.87	-3.65	5	4	20	O=C(N[C@H](C(=O)N)Cc1ccccc1)CNC(=O)[C@@H](NC(=O)[C@H](CCC[NH+]=C(N)N)[NH3+])CCC[NH+]=C(N)N	1	C433H156N106O126SZn+8	valid	Zn
3qw6	general	Protein-Ligand	1.6	IC50=300uM	IC50	3.52	2012	Botulinum neurotoxin type A	5-mer	P0DPI1	C20H34N8O5S	498.6	498.237	68	68	283.07	-0.47	-2.55	6	5	19	SC[C@@H](C(=O)N)NC(=O)CNC(=O)[C@@H](NC(=O)[C@H](CCC[NH+]=C(N)N)[NH3+])Cc1ccc(cc1)O	1	C376H123N84NaO104SZn+7	train	ZnNa
3qw7	general	Protein-Ligand	1.5	IC50=1.8uM	IC50	5.74	2012	Botulinum neurotoxin type A	5-mer	P0DPI1	C24H44N11O4S	582.742	582.33	84	84	328.85	1.2	-3.35	5	4	22	SC[C@@H](C(=O)N)NC(=O)[C@@H](NC(=O)[C@@H](NC(=O)[C@H](CCC[NH+]=C(N)N)[NH3+])CCC[NH+]=C(N)N)Cc1ccccc1	1	C411H148N100NaO118SZn+9	train	ZnNa
3qw8	general	Protein-Ligand	1.6	IC50=8.0uM	IC50	5.1	2012	Botulinum neurotoxin type A	5-mer	P0DPI1	C14H30N8O4S2	438.569	438.183	58	57	301.64	-1.78	-3.56	5	4	18	SC[C@@H](C(=O)N)NC(=O)CNC(=O)[C@@H](NC(=O)[C@H](CS)[NH3+])CCC[NH+]=C(N)N	1	C353H132N82NaO103SZn+5	train	ZnNa
3qxc	general	Protein-Ligand	1.34	Kd=1.7uM	Kd	5.77	2011	Dethiobiotin synthetase	ATP	O24872	C10H19N5O13P3	510.205	510.019	50	52	329.38	-6.07	-2.36	3	12	9	O[C@@H]1[C@@H](COP(OP(OP(O)(O)O)(O)O)(O)O)O[C@H]([C@@H]1O)n1cnc2c1ncnc2N	1	C244H97MgN73O77S2+7	train	Mg
3qxh	general	Protein-Ligand	1.36	Kd=5.8uM	Kd	5.24	2011	Dethiobiotin synthetase	ADP	O24872	C10H17N5O10P2	429.217	429.045	44	46	266.1	-4.89	-2.04	3	10	7	O[C@@H]1[C@@H](COP(OP(O)(O)O)(O)O)O[C@H]([C@@H]1O)n1cnc2c1ncnc2N	1	C238H93Mg2N74O75S2+8	train	Mg
3qyy	general	Protein-Ligand	1.9	Kd=8.26uM	Kd	5.08	2011	GGDEF-domain-containing diguanylate cyclase (DGC)(128-291)	C2E	Q8P559	C20H28N10O14P2	694.442	694.126	74	80	385.62	-4.36	-3.92	2	10	4	O[C@@H]1[C@@H]2OP(O)(O)OC[C@H]3O[C@H]([C@@H]([C@@H]3OP(OC[C@H]2O[C@H]1n1cnc2c1[nH]c(N)[nH+]c2=O)(O)O)O)n1cnc2c1[nH]c(N)[nH+]c2=O	1	C294H99Mg2N76O83S4+8	valid	Mg
3r0i	general	Protein-Ligand	2.1	IC50=0.12uM	IC50	6.92	2011	1-deoxy-D-xylulose 5-phosphate reductoisomerase	C0K	P45568	C11H15F2NO5P	310.211	310.066	35	35	114.82	-0.73	1.37	1	5	6	O=C(N(O)C)CC[C@H](P(O)(O)O)c1ccc(c(c1)F)F	1	C221H89MnN63O73S4+5	train	Mn
3r16	refined	Protein-Ligand	1.6	Ki=50nM	Ki	7.3	2011	Carbonic anhydrase 2	5UN	P00918	C12H12N2O3S2	296.365	296.029	31	32	125.88	0.97	3.43	2	3	5	O=C(Cc1cccs1)Nc1ccc(cc1)S(=O)(=O)N	1	C305H95N79O67SZn+6	valid	Zn
3r17	refined	Protein-Ligand	1.7	Ki=390nM	Ki	6.41	2011	Carbonic anhydrase 2	5UM	P00918	C12H11FN2O3S2	314.356	314.02	31	32	125.88	1.07	3.57	2	3	5	O=C(Nc1ccc(cc1F)S(=O)(=O)N)Cc1cccs1	1	C316H97N81O72SZn+6	train	Zn
3r21	general	Protein-Ligand	2.9	IC50=0.18uM	IC50	6.74	2011	Serine/threonine-protein kinase 6	D36	O14965	C20H29N8O2S	445.562	445.213	60	63	141.92	1.79	3.02	2	6	7	[NH3+]CCN(S(=O)(=O)C)c1ccc(cn1)Nc1ncc2c(n1)n(nc2)C1CCCCCC1	1	C343H102MgN90O91+8	train	Mg
3r6t	general	Protein-Ligand	1.2	IC50=1.368uM	IC50	5.86	2012	Catechol O-methyltransferase	LU1	P22734	C26H24FN5O5	505.498	505.176	61	65	142.62	2.77	3.38	4	7	10	O[C@@H]1C[C@H](O[C@H]1n1cnc2c1ncnc2C)/C=C/CNC(=O)c1cc(cc(c1O)O)c1ccc(cc1)F	1	C325H110MgN79O99S5+4	valid	Mg
3rbm	general	Protein-Ligand	2.61	Ki=270nM	Ki	6.57	2012	Farnesyl pyrophosphate synthase	B73	A5K4U6	C17H37N2O6P2	427.433	427.213	64	64	158.42	1.78	3.3	0	6	13	CCCCCCCCCCCCn1ccn(c1)CC(P(O)(O)O)P(O)(O)O	1	C488H171Mg3N128O145S2+12	train	Mg
3rbu	refined	Protein-Ligand	1.6	Ki=370pM	Ki	9.43	2012	Glutamate carboxypeptidase 2	G88	Q04609	C6H12O7P	227.129	227.032	26	25	148.88	0.27	-0.71	0	7	3	OC(=O)CC[C@@H](C(=O)O)CP(O)(O)O	1	C287H106N79O89Zn2+7	valid	Zn
3rde	general	Protein-Ligand	1.89	IC50=0.035uM	IC50	7.46	2012	catalytic domain of porcine leukocyte 12-lipoxygenase	OYP	P16469	C23H34O3	358.514	358.251	60	60	46.53	8.17	5.75	0	2	14	CCCCCCCCCCC#CCOCc1ccc(cc1)CCC(=O)O	1	C435H149FeN126O120S3+10	train	Fe
3rl3	general	Protein-Ligand	1.42	IC50=67nM	IC50	7.17	2011	Metallophosphoesterase MPPED2	5GP	B1WBP0	C10H16N5O8P	365.237	365.074	40	42	224.04	-3.26	-3.01	2	7	5	O[C@@H]1[C@H](O)[C@H](O[C@H]1n1cnc2c1[nH]c(N)[nH+]c2=O)COP(O)(O)O	1	C281H92Mn3N83O81S2+8	train	Mn
3rl4	general	Protein-Ligand	1.29	IC50=3800nM	IC50	5.42	2011	Metallophosphoesterase MPPED2 (G252H)	5GP	B1WBP0	C10H16N5O8P	365.237	365.074	40	42	224.04	-3.26	-3.01	2	7	5	O[C@@H]1[C@H](O)[C@H](O[C@H]1n1cnc2c1[nH]c(N)[nH+]c2=O)COP(O)(O)O	1	C241H90Mn2N74O75S+7	train	Mn
3rup	general	Protein-Ligand	1.99	Ki=27.0mM	Ki	1.57	2011	Biotin carboxylase	ADP	P24182	C10H17N5O10P2	429.217	429.045	44	46	266.1	-4.89	-2.04	3	10	7	O[C@@H]1[C@@H](COP(OP(O)(O)O)(O)O)O[C@H]([C@@H]1O)n1cnc2c1ncnc2N	1	C364H134Ca2N106O100S4+14	train	Ca
3rv3	general	Protein-Ligand	1.91	IC50=10mM	IC50	2	2011	Biotin carboxylase	ADP	P24182	C10H17N5O10P2	429.217	429.045	44	46	266.1	-4.89	-2.04	3	10	7	O[C@@H]1[C@@H](COP(OP(O)(O)O)(O)O)O[C@H]([C@@H]1O)n1cnc2c1ncnc2N	1	C326H126MgN102O98S5+14	train	Mg
3rv4	refined	Protein-Ligand	1.98	Ki=5mM	Ki	2.3	2011	Biotin carboxylase(R16E mutant)	ADP	P24182	C10H17N5O10P2	429.217	429.045	44	46	266.1	-4.89	-2.04	3	10	7	O[C@@H]1[C@@H](COP(OP(O)(O)O)(O)O)O[C@H]([C@@H]1O)n1cnc2c1ncnc2N	1	C340H117CsMgN99O91S4+13	valid	Mg
3rx7	general	Protein-Ligand	2.02	Ki=940nM	Ki	6.03	2011	Cellulase	G3I	Q9AJS0	C24H44NO18	634.602	634.256	87	90	314.75	-7.98	-8.06	13	12	22	OC[C@H]1O[C@@H](O[C@H]2[C@H](O)C[NH2+]C[C@@H]2CO)[C@@H]([C@H]([C@@H]1O[C@@H]1O[C@H](CO)[C@H]([C@@H]([C@H]1O)O)O[C@@H]1O[C@H](CO)[C@H]([C@@H]([C@H]1O)O)O)O)O	1	C391H136CaN104O118S2+10	train	Ca
3ryj	refined	Protein-Ligand	1.39	Kd=16nM	Kd	7.8	2011	Carbonic anhydrase 2	RYJ	P00918	C9H9F3N2O3S	282.24	282.029	27	27	97.64	0.88	2.8	2	3	4	O=C(c1ccc(cc1)S(=O)(=O)N)NCC(F)(F)F	1	C308H92N80O68SZn+6	test	Zn
3ryv	refined	Protein-Ligand	1.2	Kd=86nM	Kd	7.07	2011	Carbonic anhydrase 2	RYV	P00918	C9H12N2O3S	228.268	228.057	27	27	97.64	0.13	2.26	2	3	4	CCNC(=O)c1ccc(cc1)S(=O)(=O)N	1	C316H102N82O72SZn+5	train	Zn
3ryw	general	Protein-Ligand	2.9	Ki=570nM	Ki	6.24	2012	Farnesyl pyrophosphate synthase	K9H	A5K4U6	C17H33NO7P2	425.394	425.173	60	60	170.68	1.77	2.95	0	7	12	CCCCCCCCCCOc1cncc(c1)CC(P(O)(O)O)P(O)(O)O	1	C485H169Mg3N125O143S2+11	train	Mg
3ryx	refined	Protein-Ligand	1.6	Kd=7.3nM	Kd	8.14	2011	Carbonic anhydrase 2	RYX	P00918	C10H9F5N2O3S	332.247	332.025	30	30	97.64	1.55	3.43	2	3	5	O=C(c1ccc(cc1)S(=O)(=O)N)NCC(C(F)(F)F)(F)F	1	C311H103N79O69SZn+6	train	Zn
3ryy	refined	Protein-Ligand	1.16	Kd=38nM	Kd	7.42	2011	Carbonic anhydrase 2	RYY	P00918	C10H14N2O3S	242.295	242.073	30	30	97.64	0.66	2.65	2	3	5	CCCNC(=O)c1ccc(cc1)S(=O)(=O)N	1	C316H100N81O71SZn+6	train	Zn
3ryz	refined	Protein-Ligand	1.37	Kd=2.4nM	Kd	8.62	2011	Carbonic anhydrase 2	RYZ	P00918	C11H9F7N2O3S	382.255	382.022	33	33	97.64	2.22	4.07	2	3	6	O=C(c1ccc(cc1)S(=O)(=O)N)NCC(C(C(F)(F)F)(F)F)(F)F	1	C322H104N83O74SZn+6	train	Zn
3rz0	refined	Protein-Ligand	1.8	Kd=28nM	Kd	7.55	2011	Carbonic anhydrase 2	RZ0	P00918	C11H16N2O3S	256.321	256.088	33	33	97.64	1.01	3.04	2	3	6	CCCCNC(=O)c1ccc(cc1)S(=O)(=O)N	1	C322H101N82O72SZn+5	train	Zn
3rz1	refined	Protein-Ligand	1.51	Kd=1.8nM	Kd	8.74	2011	Carbonic anhydrase 2	RZ1	P00918	C12H9F9N2O3S	432.262	432.019	36	36	97.64	2.89	4.7	2	3	7	O=C(c1ccc(cc1)S(=O)(=O)N)NCC(C(C(C(F)(F)F)(F)F)(F)F)(F)F	1	C336H101N84O76SZn+5	train	Zn
3rz5	refined	Protein-Ligand	1.65	Kd=13nM	Kd	7.89	2011	Carbonic anhydrase 2	RZ5	P00918	C12H18N2O3S	270.348	270.104	36	36	97.64	1.56	3.43	2	3	7	CCCCCNC(=O)c1ccc(cc1)S(=O)(=O)N	1	C293H88N70O61SZn+6	test	Zn
3rz7	refined	Protein-Ligand	1.8	Kd=1.1nM	Kd	8.96	2011	Carbonic anhydrase 2	RZ7	P00918	C13H9F11N2O3S	482.27	482.016	39	39	97.64	3.56	5.34	2	3	8	O=C(c1ccc(cc1)S(=O)(=O)N)NCC(C(C(C(C(F)(F)F)(F)F)(F)F)(F)F)(F)F	1	C306H97N79O69SZn+5	train	Zn
3rz8	refined	Protein-Ligand	1.7	Kd=6.7nM	Kd	8.17	2011	Carbonic anhydrase 2	RZ8	P00918	C13H20N2O3S	284.375	284.119	39	39	97.64	2.1	3.82	2	3	8	CCCCCCNC(=O)c1ccc(cc1)S(=O)(=O)N	1	C329H100N86O75SZn+6	valid	Zn
3s3m	general	Protein-Ligand	2.49	IC50=40nM	IC50	7.4	2011	Prototype Foamy Virus (PFV) intasome	DLU	P14350	C20H19F2N3O5	419.379	419.129	49	52	100.87	2.44	1.68	2	4	5	Fc1ccc(c(c1)F)CNC(=O)c1cn2C[C@@H]3OCC[C@H](N3C(=O)c2c(c1=O)O)C	1	C204H77Mg2N58O61+6	test	Mg
3s3n	general	Protein-Ligand	2.49	IC50=88nM	IC50	7.06	2011	Prototype Foamy Virus (PFV) intasome S217H mutant	DLU	P14350	C20H19F2N3O5	419.379	419.129	49	52	100.87	2.44	1.68	2	4	5	Fc1ccc(c(c1)F)CNC(=O)c1cn2C[C@@H]3OCC[C@H](N3C(=O)c2c(c1=O)O)C	1	C195H75Mg2N54O60+4	train	Mg
3s3o	general	Protein-Ligand	2.55	IC50=27nM	IC50	7.57	2011	Prototype Foamy Virus (PFV) intasome N224H mutant	DLU	P14350	C20H19F2N3O5	419.379	419.129	49	52	100.87	2.44	1.68	2	4	5	Fc1ccc(c(c1)F)CNC(=O)c1cn2C[C@@H]3OCC[C@H](N3C(=O)c2c(c1=O)O)C	1	C229H83Mg2N66O68+7	train	Mg
3s45	refined	Protein-Ligand	1.51	Ki=3.24nM	Ki	8.49	2012	wild-type HIV-2 protease	478	Q9W9R3	C25H35N3O6S	505.627	505.225	70	72	139.57	2.89	4.46	3	4	14	CC(CN(S(=O)(=O)c1ccc(cc1)N)C[C@H]([C@H](Cc1ccccc1)NC(=O)O[C@H]1CCOC1)O)C	1	C304H108N80O96SZn+4	train	Zn
3s68	general	Protein-Ligand	1.85	IC50=2.2nM	IC50	8.66	2012	Rat Catechol-O-methyltransferase (COMT)	TCW	P22734	C14H11NO5	273.241	273.064	31	32	103.35	3.3	3.07	2	5	4	Cc1ccc(cc1)C(=O)c1cc(O)c(c(c1)N(=O)=O)O	1	C207H69MgN49O58S2+4	train	Mg
3s71	refined	Protein-Ligand	1.25	Kd=2.3nM	Kd	8.64	2011	Carbonic anhydrase 2	EVD	P00918	C8H7NO3S	197.211	197.015	20	21	81.68	1.22	2.86	1	2	1	NS(=O)(=O)c1cc2c(o1)cccc2	1	C309H96N78O68SZn+6	train	Zn
3s72	refined	Protein-Ligand	1.6	Kd=400nM	Kd	6.4	2011	Carbonic anhydrase 2	EVE	P00918	C7H7N3O2S	197.214	197.026	20	21	97.22	0.38	1.99	2	3	1	NS(=O)(=O)c1nc2c([nH]1)cccc2	1	C216H68N58O50SZn+6	train	Zn
3s73	refined	Protein-Ligand	1.75	Kd=2nM	Kd	8.7	2011	Carbonic anhydrase 2	EVF	P00918	C7H6N2O2S2	214.265	213.987	19	20	109.67	1.28	2.72	1	3	1	NS(=O)(=O)c1nc2c(s1)cccc2	1	C292H86N74O61S2Zn+4	train	Zn
3s75	refined	Protein-Ligand	1.5	Kd=150nM	Kd	6.82	2011	Carbonic anhydrase 2	EVG	P00918	C4H5NO3S	147.152	146.999	14	14	81.68	-0.12	1.71	1	2	1	NS(=O)(=O)c1ccco1	1	C290H92N72O61SZn+4	valid	Zn
3s76	refined	Protein-Ligand	1.6	Kd=9000nM	Kd	5.05	2011	Carbonic anhydrase 2	EVH	P00918	C3H5N3O2S	147.156	147.01	14	14	97.22	-1.04	0.84	2	3	1	NS(=O)(=O)c1ncc[nH]1	1	C284H89N71O62SZn+4	valid	Zn
3s77	refined	Protein-Ligand	1.86	Kd=61nM	Kd	7.21	2011	Carbonic anhydrase 2	EVI	P00918	C3H4N2O2S2	164.206	163.971	13	13	109.67	-0.15	1.57	1	3	1	NS(=O)(=O)c1nccs1	1	C260H82N64O54SZn+4	test	Zn
3s78	refined	Protein-Ligand	1.98	Kd=340nM	Kd	6.47	2011	Carbonic anhydrase 2	EVJ	P00918	C4H5NO2S2	163.218	162.976	14	14	96.78	0.5	2.18	1	2	1	NS(=O)(=O)c1cccs1	1	C266H86N68O57SZn+4	train	Zn
3s8x	general	Protein-Ligand	1.3	Kd=0.05uM	Kd	7.3	2012	Carbonic anhydrase 2	E59	P00918	C13H13N3O4S2	339.39	339.035	35	36	156.66	0.57	2.48	2	4	5	Cc1cc(=O)[nH]c(n1)SCC(=O)c1ccc(cc1)S(=O)(=O)N	1	C337H99N86O75S2Zn+7	train	Zn
3s9i	general	Protein-Ligand	1.9	IC50=2.0uM	IC50	5.7	2012	Malate synthase G	XI7	P9WK17	C10H10O4	194.184	194.058	24	24	74.6	1.37	0.7	1	4	4	O[C@H](C(=O)O)CC(=O)c1ccccc1	1	C296H106MgN75O89S4+7	train	Mg
3s9t	general	Protein-Ligand	1.3	Kd=0.15uM	Kd	6.82	2012	Carbonic anhydrase 2	E49	P00918	C14H14ClN3O3S2	371.862	371.017	37	38	136.69	2.45	4.15	1	5	5	Cc1cc(C)nc(n1)SCC(=O)c1ccc(c(c1)S(=O)(=O)N)Cl	1	C331H97N84O72SZn+6	train	Zn
3s9z	general	Protein-Ligand	1.79	IC50=0.6uM	IC50	6.22	2012	Malate synthase G	I92	P9WK17	C10H7BrO4	271.064	269.953	22	22	74.6	3.32	2	1	4	3	OC(=O)C(=O)/C=C(/c1ccccc1Br)\O	1	C279H99MgN73O84S4+7	test	Mg
3sad	general	Protein-Ligand	1.82	IC50=1.1uM	IC50	5.96	2012	Malate synthase G	040	P9WK17	C11H10O4	206.195	206.058	25	25	74.6	2.99	1.55	1	4	3	OC(=O)C(=O)/C=C(/c1ccccc1C)\O	1	C284H102MgN76O87S4+7	train	Mg
3sap	general	Protein-Ligand	1.75	Kd=26nM	Kd	7.59	2012	Carbonic anhydrase 2	E2I	P00918	C16H19N3O3S2	365.47	365.087	43	44	136.69	2.9	4.22	1	5	8	CCCCc1cnc(nc1)SCC(=O)c1ccc(cc1)S(=O)(=O)N	1	C296H103N78O75SZn+5	valid	Zn
3sax	general	Protein-Ligand	1.1	Kd=0.27uM	Kd	6.57	2012	Carbonic anhydrase 2	E50	P00918	C14H14ClN3O3S2	371.862	371.017	37	38	136.69	2.45	4.1	1	5	6	CCc1cnc(nc1)SCC(=O)c1ccc(c(c1)S(=O)(=O)N)Cl	1	C310H94N78O68SZn+5	train	Zn
3saz	general	Protein-Ligand	2.04	IC50=0.8uM	IC50	6.1	2012	Malate synthase G	043	P9WK17	C10H7BrO4	271.064	269.953	22	22	74.6	3.32	2	1	4	3	Brc1cccc(c1)/C(=C/C(=O)C(=O)O)/O	1	C301H107MgN76O90S4+7	train	Mg
3sb0	general	Protein-Ligand	2.2	IC50=5.5uM	IC50	5.26	2012	Malate synthase G	I93	P9WK17	C11H8ClFO4	258.63	258.01	25	25	74.6	3.76	2.5	1	4	3	OC(=O)/C(=C/C(=O)c1c(F)ccc(c1Cl)C)/O	1	C297H106MgN78O88S4+8	train	Mg
3sbh	general	Protein-Ligand	1.65	Kd=52nM	Kd	7.28	2012	Carbonic anhydrase 2	E65	P00918	C14H15N3O3S2	337.417	337.055	37	38	136.69	1.82	3.5	1	5	5	O=C(c1ccc(cc1)S(=O)(=O)N)CSc1nc(C)cc(n1)C	1	C362H106N90O80S2Zn+6	train	Zn
3sbi	general	Protein-Ligand	1.4	Kd=12nM	Kd	7.92	2012	Carbonic anhydrase 2	E90	P00918	C12H11N3O3S2	309.364	309.024	31	32	136.69	1.02	2.88	1	5	5	O=C(c1ccc(cc1)S(=O)(=O)N)CSc1ncccn1	1	C317H97N81O70S2Zn+6	train	Zn
3sff	general	Protein-Ligand	2	IC50=200nM	IC50	6.7	2011	Human Histone deacetylase 8, HDAC8	0DI	Q9BY41	C20H21ClF2N3O2	408.849	408.129	49	51	68.26	2.56	1.63	1	2	6	Fc1ccc(c(c1)C(=O)N1CCN(CC1)C(=O)[C@@H](Cc1cccc(c1)Cl)[NH3+])F	1	C284H96N76O79S4Zn+5	train	Zn
3sfh	general	Protein-Ligand	2.7	IC50=90nM	IC50	7.05	2011	Human Histone deacetylase 8, HDAC8	1DI	Q9BY41	C17H17Cl2N2O	336.236	335.072	39	41	47.95	3.13	2.63	1	1	4	Clc1ccc(c(c1)Cl)C[C@H](C(=O)N1Cc2c(C1)cccc2)[NH3+]	1	C286H95N76O80S3Zn+4	train	Zn
3shb	general	Protein-Ligand	1.8	Kd=0.93uM	Kd	6.03	2011	E3 ubiquitin-protein ligase UHRF1	12-mer	Q96T88	C31H61N12O11	777.89	777.458	115	114	416.74	-5.36	-5.35	11	11	33	[NH3+]CCCC[C@@H](C(=O)N[C@H](C(=O)N[C@H](C(=O)N[C@H](C(=O)O)C)[C@H](O)C)CCC(=O)N)NC(=O)[C@H]([C@H](O)C)NC(=O)[C@@H](NC(=O)[C@@H]([NH3+])C)CCC[NH+]=C(N)N	1	C234H79N68O74S10Zn+7	train	Zn
3shy	general	Protein-Ligand	2.65	IC50=90.9nM	IC50	7.04	2011	cGMP-specific 3',5'-cyclic phosphodiesterase, PDE5A1 catalytic domain	5FO	O76074	C20H28FN4O4S	439.524	439.182	58	60	105.18	1.87	3.03	1	3	7	CCCOc1ccc(cc1c1nc(CC)c(c(=O)[nH]1)F)S(=O)(=O)N1CC[NH+](CC1)C	1	C323H123MgN85O88S5Zn+7	test	ZnMg
3shz	general	Protein-Ligand	2.45	IC50=35.9nM	IC50	7.44	2011	cGMP-specific 3',5'-cyclic phosphodiesterase, PDE5A1 catalytic domain	5CO	O76074	C20H28ClN4O4S	455.979	455.152	58	60	105.18	2.4	3.55	1	3	7	CCCOc1ccc(cc1c1nc(CC)c(c(=O)[nH]1)Cl)S(=O)(=O)N1CC[NH+](CC1)C	1	C285H112MgN78O82S4Zn+6	train	ZnMg
3sjf	refined	Protein-Ligand	1.65	Ki=23nM	Ki	7.64	2011	Glutamate carboxypeptidase 2	JRG	Q04609	C19H26IN3O6S	551.396	551.059	56	56	170.13	4.1	3.32	3	6	14	CSCC[C@@H](C(=O)O)NC(=O)N[C@H](C(=O)O)CCCCNC(=O)c1ccc(cc1)I	1	C439H136N125O134SZn2+13	train	Zn
3sjt	general	Protein-Ligand	1.6	Kd=0.88uM	Kd	6.06	2011	Arginase-1, HAI	5AB	P05089	C7H18BNO5	207.033	207.128	32	31	125.63	-2.4	-1.98	4	5	7	OC(=O)[C@](CCCC[B](O)(O)O)([NH3+])C	1	C245H85Mn2N73O86S+3	train	Mn
3skk	general	Protein-Ligand	1.7	Kd=34uM	Kd	4.47	2011	Arginase-1,HAI	4U7	P05089	C7H16BF2NO5	243.013	243.109	32	31	125.63	-1.91	-1.73	4	5	8	FC([C@@](C(=O)O)(CCCC[B](O)(O)O)[NH3+])F	1	C251H93Mn2N72O87S+3	valid	Mn
3sl0	general	Protein-Ligand	2	Ki=2mM	Ki	2.7	2011	Arginase, PFA	FB5	Q8I384	C7H15BF2NO4	226.006	226.106	30	29	105.4	-1.44	-1.04	3	4	8	OB(CCCC[C@](C(=O)O)(C(F)F)[NH3+])O	1	C254H93Mn2N71O86S+3	train	Mn
3sl1	general	Protein-Ligand	1.9	Kd=260uM	Kd	3.59	2011	Arginase, PFA	FB6	Q8I384	C7H17BNO4	190.025	190.125	30	29	105.4	-1.92	-1.29	3	4	7	OB(CCCC[C@@](C(=O)O)([NH3+])C)O	1	C254H93Mn2N71O86S+3	train	Mn
3sl4	general	Protein-Ligand	1.9	IC50=27nM	IC50	7.57	2011	catalytic domain of human PDE4D2	JN4	Q08499	C21H25N3O4S	415.506	415.157	54	56	115.98	3.04	3.6	2	3	10	CCNC(=O)N1CCc2c(C1)sc(c2C(=O)OCC)NC(=O)Cc1ccccc1	1	C406H130N105O115S5Zn2+8	test	Zn
3sl5	general	Protein-Ligand	2.65	IC50=22nM	IC50	7.66	2011	catalytic domain of human PDE4D2	J25	Q08499	C19H22N2O5S2	422.518	422.097	50	52	141.42	3.33	3.69	1	3	10	CCOC(=O)c1c(NC(=O)Cc2cccs2)sc2c1CCN(C2)C(=O)OCC	1	C397H126N103O111S5Zn2+7	train	Zn
3sl8	general	Protein-Ligand	2.6	IC50=0.29uM	IC50	6.54	2011	catalytic domain of human PDE4D2	JN7	Q08499	C22H26N2O5S2	462.582	462.128	57	60	141.42	4.23	4.62	1	3	10	CCOC(=O)N1CCc2c(C1)sc(c2C(=O)OC1CCCC1)NC(=O)Cc1cccs1	1	C366H131N93O103S4Zn2+6	test	Zn
3sn7	general	Protein-Ligand	1.82	IC50=0.7nM	IC50	9.15	2011	PDE10A	540	Q9Y233	C19H17FN4O	336.363	336.139	42	45	52.31	4.03	4.02	0	3	2	COc1cc(F)cc2c1nc(C)c1n2c(nc1C)c1ccncc1C	1	C358H133MgN87O102S7Zn+5	train	ZnMg
3sni	general	Protein-Ligand	1.9	IC50=11nM	IC50	7.96	2011	PDE10A	546	Q9Y233	C18H17N5O	319.36	319.143	41	44	65.2	3.53	3.27	0	4	2	COc1ccc2c(n1)n1c(nc(c1c(n2)C)C)c1cnccc1C	1	C318H126MgN78O92S6Zn+4	test	ZnMg
3snl	general	Protein-Ligand	2.4	IC50=0.7nM	IC50	9.15	2011	PDE10A	548	Q9Y233	C19H14ClF3N4	390.789	390.086	41	44	43.08	5.47	5.54	0	3	1	Cc1cnccc1c1nc(c2n1c1cc(cc(c1nc2C)Cl)C(F)(F)F)C	1	C331H128MgN82O97S5Zn+4	train	ZnMg
3soq	general	Protein-Ligand	1.9	IC50=27uM	IC50	4.57	2011	Low-density lipoprotein receptor-related protein 6	9-mer	O94907 O75581	C32H57N12O12	801.868	801.422	113	112	423.93	-7.16	-2.48	13	12	35	[NH3+]CCCC[C@@H](C(=O)N[C@H](C(=O)N)CC(=O)N)NC(=O)[C@H]([C@H](CC)C)NC(=O)[C@@H](NC(=O)[C@@H](NC(=O)[C@@H](NC(=O)[C@@H](NC(=O)C)CC(=O)N)CO)CC(=O)N)C	1	C263H98CaN75O89S+6	valid	Ca
3srg	general	Protein-Ligand	2.19	Ki~2uM	Ki	5.7	2012	serum paraoxonase	OCH		C9H7NO	145.158	145.053	18	19	32.86	1.33	1.53	1	1	0	O=c1ccc2c([nH]1)cccc2	1	C267H102CaN70O74S4+6	train	Ca
3str	refined	Protein-Ligand	1.75	Ki=3.96nM	Ki	8.4	2011	Peptide deformylase 3	3LI	Q939R9	C28H33ClN10O4S	641.144	640.21	77	81	193.25	3.93	3.2	5	7	13	ONC(=O)CNC(=O)[C@@H]1CSCN1c1nc(nc(n1)N1CCN(CC1)c1ccccc1Cl)Nc1c(C)cccc1C(=O)NC	1	C347H113N89NiO96S4+5	train	XX
3svj	general	Protein-Ligand	1.55	Ki=117nM	Ki	6.93	2011	Peptide deformylase 3	4LI	Q8DP79	C27H32ClN9O2S	582.12	581.209	72	76	143.92	5.08	3.94	3	5	9	CNC(=O)[C@@H]1CSCN1c1nc(nc(n1)N1CCN(CC1)c1ccccc1Cl)Nc1c(C)cccc1C(=O)NC	1	C300H102N81NiO87S2+7	train	XX
3sw8	refined	Protein-Ligand	1.7	Ki=31.72uM	Ki	4.5	2011	Peptide deformylase 3	5LI	Q939R9	C10H10Cl2N2O3	277.104	276.007	27	27	69.64	1.48	2.6	2	3	7	ON(C=O)CCNC(=O)c1cccc(c1Cl)Cl	1	C255H90N67NiO71S3+5	train	XX
3t01	refined	Protein-Ligand	1.6	Ki=33uM	Ki	4.48	2011	phosphonoacetate hydrolase	PPF	Q92UV8	CH4O5P	127.013	126.98	11	10	111.58	-1.26	-0.6	0	5	0	OC(=O)P(O)(O)O	1	C173H70N49O57SZn2+5	train	Zn
3t08	refined	Protein-Ligand	2	Ki=0.91mM	Ki	3.04	2012	Beta-galactosidase(S796A mutant)	IPT	P00722	C9H18O5S	238.301	238.087	33	33	115.45	-0.46	-1.07	4	4	7	OC[C@H]1O[C@@H](SC(C)C)[C@@H]([C@H]([C@H]1O)O)O	1	C265H114MgN80NaO87S7+6	train	MgNa
3t09	refined	Protein-Ligand	1.75	Ki=0.16mM	Ki	3.8	2012	Beta-galactosidase(S796A mutant)	149	P00722	C6H10O6	178.14	178.048	22	22	107.22	-2.03	-3.01	4	5	5	OC[C@H]1OC(=O)[C@@H]([C@H]([C@H]1O)O)O	1	C244H111MgN72NaO82S6+5	valid	MgNa
3t0b	refined	Protein-Ligand	2.4	Ki=0.05mM	Ki	4.3	2012	Beta-galactosidase(S796T mutant)	IPT	P00722	C9H18O5S	238.301	238.087	33	33	115.45	-0.46	-1.07	4	4	7	OC[C@H]1O[C@@H](SC(C)C)[C@@H]([C@H]([C@H]1O)O)O	1	C258H115MgN76NaO86S7+5	train	MgNa
3t0d	refined	Protein-Ligand	1.93	Ki=4.3mM	Ki	2.37	2012	Beta-galactosidase(S796T mutant)	149	P00722	C6H10O6	178.14	178.048	22	22	107.22	-2.03	-3.01	4	5	5	OC[C@H]1OC(=O)[C@@H]([C@H]([C@H]1O)O)O	1	C241H108MgN71NaO79S7+6	train	MgNa
3t2c	general	Protein-Ligand	1.3	Kd=25uM	Kd	4.6	2011	Fructose-1,6-bisphosphate aldolase/phosphatase	13P	B1YAL1	C3H8O5P	155.066	155.011	17	16	103.74	-1.78	-0.27	1	4	3	O/C=C/COP(O)(O)O	1	C239H89Mg3N69O80S2+5	train	Mg
3t2p	general	Protein-Ligand	2.6	Ki=0.25mM	Ki	3.6	2012	Beta-galactosidase(S796D mutant)	IPT	P00722	C9H18O5S	238.301	238.087	33	33	115.45	-0.46	-1.07	4	4	7	OC[C@H]1O[C@@H](SC(C)C)[C@@H]([C@H]([C@H]1O)O)O	1	C257H116MgN78NaO88S7+7	train	MgNa
3t2q	refined	Protein-Ligand	2.4	Ki=0.22mM	Ki	3.66	2012	Beta-galactosidase(S796D mutant)	149	P00722	C6H10O6	178.14	178.048	22	22	107.22	-2.03	-3.01	4	5	5	OC[C@H]1OC(=O)[C@@H]([C@H]([C@H]1O)O)O	1	C233H109MgN67NaO82S7+5	test	MgNa
3t3y	general	Protein-Ligand	2	IC50=3.4uM	IC50	5.47	2012	Alpha-ketoglutarate-dependent dioxygenase AlkB	MD6	P05050	C8H6N2O4	194.144	194.033	20	20	99.85	1.51	0.08	1	5	3	OC(=O)/C=N/C(=O)c1ncccc1O	1	C307H98FeN79O74S+8	train	Fe
3t4h	general	Protein-Ligand	1.65	IC50=5.2uM	IC50	5.28	2012	Alpha-ketoglutarate-dependent dioxygenase AlkB	MD5	P05050	C12H12N2O7S	328.298	328.037	34	34	174.82	2.63	1.4	1	7	6	OC(=O)[C@@H](NC(=O)C(=O)O)CSCc1cccc(c1)N(=O)=O	1	C354H104FeN89O86S+8	train	Fe
3t4v	general	Protein-Ligand	1.73	IC50=0.5uM	IC50	6.3	2012	Alpha-ketoglutarate-dependent dioxygenase AlkB	MD3	P05050	C16H15NO5S	333.359	333.067	38	39	129	4.05	2.12	1	5	6	OC(=O)[C@@H](NC(=O)C(=O)O)CSCc1ccc2c(c1)cccc2	1	C378H116FeN96O95S3+8	train	Fe
3t5u	refined	Protein-Ligand	1.75	Ki=0.026uM	Ki	7.59	2012	human carbonic anhydrase II	A09	P00918	C6H7NO3S	173.19	173.015	18	18	74.78	0.4	1.83	2	3	3	ONS(=O)(=O)c1ccccc1	1	C288H90N74O65SZn+4	test	Zn
3t6r	general	Protein-Ligand	1.95	Kd=2.20uM	Kd	5.66	2011	E3 ubiquitin-protein ligase UHRF1	7-mer	Q96T88 Q16695	C24H49N10O8	605.708	605.373	91	90	338.31	-4.24	-4.5	8	8	25	[NH3+]CCCC[C@@H](C(=O)N[C@H](C(=O)O)CCC(=O)N)NC(=O)[C@H]([C@H](O)C)NC(=O)[C@@H](NC(=O)[C@@H]([NH3+])C)CCC[NH+]=C(N)N	1	C241H84MgN54O83S10Zn+	train	ZnMg
3t82	refined	Protein-Ligand	2	Ki=101nM	Ki	7	2011	Carbonic anhydrase 2	SG4	P00918	C10H17NO10S	343.308	343.057	39	39	180.06	-2.56	-1.07	3	6	9	CC(=O)O[C@@H]1[C@@H](COS(=O)(=O)N)O[C@@H]([C@@H]([C@H]1OC(=O)C)O)O	1	C341H101N86O77SZn+5	valid	Zn
3t83	refined	Protein-Ligand	1.8	Ki=105nM	Ki	6.98	2011	Carbonic anhydrase 2	MG5&SG5	P00918	C15H23NO11S	425.408	425.099	51	51	182.97	-0.02	0.88	1	6	12	CCC(=O)O[C@H]1[C@H](OC(=O)CC)[C@@H](COS(=O)(=O)N)OC(=O)[C@@H]1OC(=O)CC	1	C392H115N96O87S2Zn+5	valid	Zn
3t84	refined	Protein-Ligand	2	Ki=106nM	Ki	6.97	2011	Carbonic anhydrase 2	SG6	P00918	C8H15NO9S	301.271	301.047	34	34	173.99	-3.13	-1.64	4	6	8	CC(=O)O[C@H]1[C@@H](COS(=O)(=O)N)O[C@@H]([C@@H]([C@H]1O)O)O	1	C339H98N84O76S2Zn+4	train	Zn
3t85	refined	Protein-Ligand	2.4	Ki=11.3nM	Ki	7.95	2011	Carbonic anhydrase 2	SG7	P00918	C10H17NO10S	343.308	343.057	39	39	180.06	-2.56	-1.07	3	6	9	CC(=O)O[C@@H]1[C@@H](COS(=O)(=O)N)O[C@@H]([C@H]([C@H]1OC(=O)C)O)O	1	C342H94N84O77SZn+4	train	Zn
3t8v	refined	Protein-Ligand	1.8	Ki=260nM	Ki	6.59	2011	M1 family aminopeptidase	BTJ	O96935	C29H43N4O7	559.674	559.313	83	84	162.86	1.07	1.13	5	4	22	CC(NC(=O)COCCOCCNC(=O)[C@@H](NC(=O)[C@H]([C@@H](Cc1ccc(cc1)OCc1ccccc1)[NH3+])O)C)C	1	C519H192N136O155S5Zn+10	train	Zn
3t8w	general	Protein-Ligand	2	Ki=29nM	Ki	7.54	2011	M17 leucyl aminopeptidase	DGZ	Q8IL11	C57H70N7O10	1013.21	1012.52	144	148	271.99	5.08	5.46	8	8	39	C=CCCCC(=O)NCCCC[C@@H](C(=O)N)NC(=O)[C@H](Cc1ccc(cc1)C(=O)c1ccccc1)NC(=O)COCCOCCNC(=O)[C@@H](NC(=O)[C@H]([C@@H](Cc1ccccc1)[NH3+])O)Cc1ccc2c(c1)cccc2	1	C527H191N133O162S8Zn2+7	valid	Zn
3tfp	refined	Protein-Ligand	2	Ki=0.34uM	Ki	6.47	2012	Dehydrosqualene synthase	03L	A9JQL9	C21H14Cl3NO3S	466.765	464.976	43	45	91.7	7.26	6.82	1	3	6	Clc1ccc(c(c1)Cl)Sc1cccc(c1CNC(=O)c1ccccc1C(=O)O)Cl	1	C329H121Mg2N88O91S3+8	train	Mg
3tge	general	Protein-Ligand	1.96	IC50=0.07nM	IC50	10.15	2011	cGMP-specific 3',5'-cyclic phosphodiesterase, PDE5 Catalytic domain	TGE	O76074	C24H33N6O4	469.557	469.256	67	70	104.83	0.94	2.26	2	3	11	CCCOCCn1c(=O)c(NCC[NH+]2CCOCC2)nc2c1cc(nc2)c1ccc(nc1)OC	1	C429H144MgN113O116S6Zn+9	test	ZnMg
3ts4	refined	Protein-Ligand	1.59	Ki=1.9nM	Ki	8.72	2012	Macrophage metalloelastase	EEG	P39900	C29H31N3O7S	565.637	565.188	71	73	204.13	5.35	4.68	3	7	15	O=C(N[C@H](C(=O)N[C@H](C(=O)N)CCC(=O)O)CCC(=O)O)CCc1ccc(cc1)c1scc(c1)c1ccccc1	1	C337H105N86O95SZn2+8	train	Zn
3tsk	refined	Protein-Ligand	2	Kd=67nM	Kd	7.17	2012	Macrophage metalloelastase	QEG	P39900	C29H32N4O6S	564.653	564.204	72	74	209.92	3.26	4.78	4	6	16	O=C(N[C@H](C(=O)N[C@H](C(=O)N)CCC(=O)O)CCC(=O)N)CCc1ccc(cc1)c1scc(c1)c1ccccc1	1	C317H103CaN84O92SZn2+9	valid	ZnCa
3tt4	refined	Protein-Ligand	1.88	Ki=5.3nM	Ki	8.28	2012	Neutrophil collagenase	E1S	P22894	C19H22N2O4S	374.454	374.13	48	49	137.73	3.45	3.58	2	4	9	O=C(N[C@H](C(=O)N)CCC(=O)O)CCc1ccc(cc1)c1ccc(s1)C	1	C310H98CaN77O85SZn2+6	valid	ZnCa
3tvc	refined	Protein-Ligand	2.43	Ki=18nM	Ki	7.74	2012	Collagenase 3	E3P	P45452	C26H26N2O4	430.496	430.189	58	60	109.49	4.96	4.88	2	4	10	O=C(N[C@H](C(=O)N)CCC(=O)O)CCc1ccc(cc1)c1ccc(cc1)c1ccccc1	1	C337H103CaN76O89S2Zn2+6	test	ZnCa
3tvx	general	Protein-Ligand	2.84	Ki=72uM	Ki	4.14	2012	cAMP-specific 3',5'-cyclic phosphodiesterase 4A	PNX	P27815	C13H18N4O3	278.307	278.138	38	39	78.89	-0.06	0.19	0	4	5	CC(=O)CCCCn1c(=O)c2n(C)cnc2n(c1=O)C	1	C296H110MgN79O84S4Zn+5	valid	ZnMg
3u6w	general	Protein-Ligand	2.21	Kd=120nM	Kd	6.92	2012	Truncated M. tuberculosis LeuA (1-425)	KIV	P9WQB3	C5H8O3	116.115	116.047	16	15	54.37	1.6	0.3	0	3	1	CC(C(=O)C(=O)O)C	1	C247H100MnN72O81+6	train	Mn
3u78	general	Protein-Ligand	2.69	Ki=2.5uM	Ki	5.6	2012	human histone H3 lysine 9 Jumonji demethylase, KIAA1718	E67	Q6ZMT4	C19H34N6O2	378.512	378.274	61	62	114.37	1.98	0.61	3	2	12	[NH3+]CCCCCOc1cc2nc(NCCC[NH+](C)C)nc(c2cc1OC)N	1	C406H125N93NiO110S3+8	test	XX
3u7k	general	Protein-Ligand	1.9	Ki=84.9nM	Ki	7.07	2012	Peptide deformylase	MDB	Q5HGZ3	C22H34N4O5	434.529	434.253	65	66	120	2.87	3.61	4	4	14	ONC(=O)CN(C(=O)[C@H](C(C)(C)C)NC(=O)Nc1ccccc1OC)CC1CCCC1	1	C317H110N79O89S4Zn+5	train	Zn
3u7l	general	Protein-Ligand	2.01	Ki=52.4nM	Ki	7.28	2012	Peptide deformylase	UDB	Q5HGZ3	C21H30F2N4O4	440.484	440.224	61	62	110.77	3.1	3.88	4	4	13	ONC(=O)CN(C(=O)[C@H](C(C)(C)C)NC(=O)Nc1cc(F)cc(c1)F)CC1CCCC1	1	C311H108N79O88S4Zn+5	valid	Zn
3u7m	general	Protein-Ligand	2.15	Ki=35.1nM	Ki	7.45	2012	Peptide deformylase	FHF	Q5HGZ3	C19H28FN3O4	381.442	381.206	55	55	98.74	3.11	4.29	3	4	14	CCCC[C@@H](C(=O)[C@H](C(C)C)NC(=O)Nc1ccccc1F)CN(C=O)O	1	C295H108N76O87S3Zn+5	train	Zn
3u7n	general	Protein-Ligand	2.3	Ki=11.2nM	Ki	7.95	2012	Peptide deformylase	UHF	Q5HGZ3	C19H30N4O4	378.466	378.227	57	57	111.63	2.64	3.86	3	5	14	CCCC[C@@H](C(=O)[C@H](C(C)C)NC(=O)Nc1ccc(cn1)C)CN(C=O)O	1	C284H98N70O78S3Zn+4	test	Zn
3u8d	general	Protein-Ligand	1.8	IC50=0.47uM	IC50	6.33	2012	Phospholipase A2, membrane associated	U8D	P14555	C22H30N2O5P	433.458	433.189	60	62	129.84	1.51	3.72	1	4	9	CC[C@H]1[C@H](CC(=O)N)c2c(N1Cc1ccccc1)ccc(c2)OCCCP(O)(O)O	1	C289H94CaN78O81S10+10	train	Ca
3u8h	general	Protein-Ligand	2.3	IC50=0.32uM	IC50	6.49	2012	Phospholipase A2, membrane associated	BHP	P14555	C31H37NO4	487.63	487.272	73	75	75.63	8.2	6.74	1	3	16	OC(=O)CC[C@@H](Cc1ccc(cc1)OCc1ccccc1)NC(=O)CCCCCCc1ccccc1	1	C267H90CaN72O75S8+8	train	Ca
3u90	refined	Protein-Ligand	1.9	Kd=24uM	Kd	4.62	2012	apoferritin	SDS	P02791	C12H28O4S	268.413	268.171	45	44	95.22	4.82	5.06	0	3	11	CCCCCCCCCCCCOS(O)(O)O	1	C214H57Cd3N54O57S+6	test	XX
3ucj	refined	Protein-Ligand	1.85	Ki=1uM	Ki	6	2011	Coccomyxa beta-carbonic anhydrase	AZM	Q96554	C4H6N4O3S2	222.245	221.988	19	19	151.66	-1.23	1	2	5	3	CC(=O)Nc1nnc(s1)S(=O)(=O)N	1	C240H83N71O67S4Zn+6	test	Zn
3uhm	general	Protein-Ligand	1.26	IC50=3.6nM	IC50	8.44	2012	UDP-3-O-[3-hydroxymyristoyl] N-acetylglucosamine deacetylase, LpxC	RFN	P47205	C17H22N2O5S	366.432	366.125	47	48	112.16	0.04	2.41	2	5	8	ONC(=O)[C@](S(=O)(=O)C)(CCN1CC=C(CC1=O)c1ccccc1)C	1	C315H115N85O94S2Zn+7	train	Zn
3ui7	refined	Protein-Ligand	2.28	Ki=1nM	Ki	9	2011	catalytic domain of human PDE10A	C1L	Q9Y233	C18H23N4O2	327.401	327.182	47	50	64.47	2.35	2.72	2	2	3	COc1cc(C)c2c(c1)c(C[NH+]1CCOCC1)c1c(n2)n[nH]c1C	1	C321H118MgN78O93S4Zn+4	test	ZnMg
3upy	general	Protein-Ligand	1.8	IC50=2.39uM	IC50	5.62	2012	Oxidoreductase	FOM	Q2YIM3	C4H10NO5P	183.1	183.03	21	20	120.78	-2.25	0.21	0	5	4	O=C[N](=O)CCCP(O)(O)O	1	C199H84MgN53O63S3+7	train	Mg
3usn	general	Protein-Ligand	NMR	Ki=710nM	Ki	6.15	1999	stromelysin-1	ATT	P08254	C13H15N5O2S2	337.421	337.067	37	38	163.05	1.53	2.16	3	4	9	CNC(=O)[C@H](Cc1ccccc1)NC(=O)Nc1nnc(s1)S	1	C271H80CaN64O70SZn+4	valid	ZnCa
3uuo	refined	Protein-Ligand	2.11	Ki=11nM	Ki	7.96	2012	cAMP and cAMP-inhibited cGMP 3',5'-cyclic phosphodiesterase, PDE 10A	0CV	Q9Y233	C17H22N5O	312.389	312.182	45	48	70.65	2.36	2.75	2	2	2	COc1cc(C)c2c(c1)c(N1CC[NH2+]CC1)c1c(n2)[nH]nc1C	1	C296H118MgN71O87S6Zn+3	train	ZnMg
3uxk	refined	Protein-Ligand	2.2	Ki=11.7uM	Ki	4.93	2012	Mandelate racemase	BHO	P11444	C7H7NO2	137.136	137.048	17	17	49.33	0.71	1.2	2	2	3	ONC(=O)c1ccccc1	1	C271H101MgN70O84S3+5	train	Mg
3uxl	refined	Protein-Ligand	2.2	Ki=2.7uM	Ki	5.57	2012	Mandelate racemase	CFI	P11444	C6H5N2O2	137.116	137.035	15	15	58.86	1.01	2.3	0	2	1	O=N[N](=O)c1ccccc1	1	C251H92MgN64O77S2+5	test	Mg
3uxm	general	Protein-Ligand	1.95	IC50=20uM	IC50	4.7	2012	Pseudomonas aeruginosa Thymidylate Kinase	0DN	Q9HZN8	C10H13FN2O4	244.22	244.086	30	31	84.32	-0.48	-0.54	2	3	3	FC[C@H]1O[C@H](C[C@@H]1O)n1cc(C)c(=O)[nH]c1=O	1	C275H98MgN74O82S2+7	valid	Mg
3v01	general	Protein-Ligand	2.71	IC50=25nM	IC50	7.6	2012	DUAL SPECIFICITY MITOGEN-ACTIVATED PROTEIN KINASE KINASE 1, human MEK1	3V0	Q02750	C17H15FIN3O5	487.221	487.004	42	44	116.85	2.45	2.79	4	4	10	OC[C@H](CONC(=O)c1oc2c(c1Nc1ccc(cc1F)I)cncc2)O	1	C296H99MgN82O82S6+8	train	Mg
3v04	general	Protein-Ligand	2.7	IC50=13nM	IC50	7.89	2012	DUAL SPECIFICITY MITOGEN-ACTIVATED PROTEIN KINASE KINASE 1, human MEK1	V04	Q02750	C16H14FIN4O3	456.21	456.009	39	41	99.27	3.04	3.17	4	3	8	OCCONC(=O)c1ccc2c(c1Nc1ccc(cc1F)I)c[nH]n2	1	C264H90MgN70O75S5+5	train	Mg
3v0l	general	Protein-Ligand	1.75	Ki=3.0uM	Ki	5.52	2013	Histo-blood group ABO system transferase	2GW	P16442	C21H30N2O17P2	644.414	644.102	72	75	330.49	-5.17	-4	7	12	16	OC[C@H]1O[C@H](OP(OP(OC[C@H]2O[C@H]([C@@H]([C@@H]2O)O)n2cc(c3ccccc3)c(=O)[nH]c2=O)(O)O)(O)O)[C@@H]([C@H]([C@H]1O)O)O	1	C389H109MnN89O101S3+5	test	Mn
3v0p	general	Protein-Ligand	1.9	Ki=0.53uM	Ki	6.28	2013	Histo-blood group ABO system transferase	4GW	P16442	C14H20N2O13P2S	518.327	518.016	52	54	299.81	-4.79	-2.27	4	10	10	OCc1ccc(s1)c1cn(c(=O)[nH]c1=O)[C@@H]1O[C@@H]([C@H]([C@H]1O)O)COP(OP(O)(O)O)(O)O	1	C328H94MnN89O83S3+9	train	Mn
3v1r	general	Protein-Ligand	2.8	IC50=21nM	IC50	7.68	2012	reverse transcriptase-associated ribonuclease H domain of XMRV	JTH	Q2F7J3	C10H20O3	188.264	188.141	33	33	60.69	0.81	0.53	3	3	4	CC([C@@H]1CC[C@H]([C@@H]([C@@H](C1)O)O)O)C	1	C148H60Mn2N55O54S+6	train	Mn
3v5g	general	Protein-Ligand	1.5	Ki=74nM	Ki	7.13	2012	human carbonic anhydrase II	0F3	P00918	C6H9N3O4S2	251.283	251.003	24	24	149.11	-1.22	2.58	3	4	3	NS(=O)(=O)Nc1ccc(cc1)S(=O)(=O)N	1	C300H93N75O63SZn+5	train	Zn
3v7x	refined	Protein-Ligand	1.03	Ki=2.7nM	Ki	8.57	2012	human carbonic anhydrase II	D7A	P00918	C17H20N2O5S	364.416	364.109	45	46	116.1	1.66	3.5	2	3	8	COc1ccc(cc1OC)CCNC(=O)c1ccc(cc1)S(=O)(=O)N	1	C347H106N86O74SZn+6	valid	Zn
3v9b	general	Protein-Ligand	2.1	IC50=0.5nM	IC50	9.3	2012	cAMP-specific 3',5'-cyclic phosphodiesterase 4D	IHM	Q08499	C29H28F2N4O4	534.554	534.208	67	71	90.84	4.23	6.23	1	3	12	FC(Oc1ccc(cc1OCC1CC1)[C@@H](n1ccc(n1)c1cccc(c1)NC(=O)C)Cc1cc[n+](cc1)[O-])F	1	C389H126N104O112S5Zn2+7	test	Zn
3vbd	refined	Protein-Ligand	1.05	Ki=8.6nM	Ki	8.07	2012	human carbonic anhydrase II	0FZ	P00918	C16H19N2O3S	319.399	319.112	41	43	94.38	1.56	3.9	2	2	3	COc1ccc2c(c1)CC[NH2+][C@H]2c1ccc(cc1)S(=O)(=O)N	1	C301H101N77O65SZn+6	train	Zn
3vd4	refined	Protein-Ligand	2	Ki=0.015mM	Ki	4.82	2012	E. coli (lacZ) beta-galactosidase (N460D mutant)	IPT	P00722	C9H18O5S	238.301	238.087	33	33	115.45	-0.46	-1.07	4	4	7	OC[C@H]1O[C@@H](SC(C)C)[C@@H]([C@H]([C@H]1O)O)O	1	C251H113MgN73NaO83S7+5	train	MgNa
3vd7	general	Protein-Ligand	2.87	Ki=0.033mM	Ki	4.48	2012	E. coli (lacZ) beta-galactosidase (N460S mutant)	GTZ	P00722	C6H10N4O4	202.168	202.07	24	25	124.52	-2.88	-3.02	4	7	5	OC[C@@H]1[C@H](O)[C@H](O)[C@H](c2n1nnn2)O	1	C247H111MgN72NaO82S5+5	train	MgNa
3vd9	refined	Protein-Ligand	2.05	Ki=0.10mM	Ki	4	2012	E. coli (lacZ) beta-galactosidase (N460S mutant)	IPT	P00722	C9H18O5S	238.301	238.087	33	33	115.45	-0.46	-1.07	4	4	7	OC[C@H]1O[C@@H](SC(C)C)[C@@H]([C@H]([C@H]1O)O)O	1	C250H112MgN73NaO82S7+5	train	MgNa
3vdb	refined	Protein-Ligand	2.05	Ki=3.03mM	Ki	2.52	2012	E. coli (lacZ) beta-galactosidase (N460T mutant)	149	P00722	C6H10O6	178.14	178.048	22	22	107.22	-2.03	-3.01	4	5	5	OC[C@H]1OC(=O)[C@@H]([C@H]([C@H]1O)O)O	1	C272H121MgN77NaO95S6+5	train	MgNa
3vdc	general	Protein-Ligand	2.55	Ki=0.012mM	Ki	4.92	2012	E. coli (lacZ) beta-galactosidase (N460T mutant)	IPT	P00722	C9H18O5S	238.301	238.087	33	33	115.45	-0.46	-1.07	4	4	7	OC[C@H]1O[C@@H](SC(C)C)[C@@H]([C@H]([C@H]1O)O)O	1	C265H116MgN82NaO85S7+8	train	MgNa
3vh9	refined	Protein-Ligand	1.29	Ki=0.58uM	Ki	6.24	2012	Bacterial leucyl aminopeptidase	HQY	Q01693	C9H7NO	145.158	145.053	18	19	33.12	1.83	1.94	1	2	1	Oc1cccc2c1nccc2	1	C182H73N46NaO64S4Zn2+3	train	ZnNa
3vhc	refined	Protein-Ligand	1.41	Kd=1.3nM	Kd	8.89	2012	Heat shock protein HSP 90-alpha	VHC	P07900	C22H22N4O2S	406.501	406.146	51	54	115.43	4.03	4.92	2	3	0	Nc1nc2Sc3cccc(c3)OCCCNC(=O)c3cc(c(n1)c2)c(C)cc3C	1	C305H108MgN71O86S2+4	train	Mg
3vi5	general	Protein-Ligand	2	IC50=2.1uM	IC50	5.68	2012	Hematopoietic prostaglandin D synthase	M4M	O60760	C20H17N3O7S2	475.495	475.051	49	52	226.72	2.23	5.45	3	7	3	Nc1c2C(=O)c3ccccc3C(=O)c2c(cc1S(O)(O)O)Nc1ccc(cc1)S(=O)(=O)N	1	C343H114CaN78O91S5+5	train	Ca
3vi7	general	Protein-Ligand	2	IC50=40.4nM	IC50	7.39	2012	Hematopoietic prostaglandin D synthase	CBD	O60760	C29H28ClN7O11S3	782.221	781.07	79	84	396.05	4.01	8.51	5	14	7	Clc1nc(nc(n1)Nc1ccccc1S(O)(O)O)Nc1ccc(cc1S(O)(O)O)Nc1cc(c(c2c1[C@H](O)c1ccccc1C2=O)N)S(O)(O)O	1	C387H126CaN89O103S7+6	valid	Ca
3vva	general	Protein-Ligand	2.59	IC50=0.48nM	IC50	9.32	2013	Alternative oxidase, mitochondrial	CHW	Q26710	C19H25ClO4	352.852	352.144	49	49	77.76	5.15	4.47	3	4	10	O=Cc1c(O)c(C/C=C(/CC/C=C(/[C@@H](O)C)\C)\C)c(c(c1C)Cl)O	1	C371H120Fe2N88O99S3+6	train	Fe
3vw9	general	Protein-Ligand	1.47	IC50=0.011uM	IC50	7.96	2012	Human Glyoxalase I	HPJ	Q04760	C22H21N3O3	375.42	375.158	49	52	69.28	2.2	3.81	1	3	7	COCCCn1ccc2c1ncc(c2)c1cc(cc(=O)n1O)c1ccccc1	1	C318H111N82O82S6Zn+11	test	Zn
3w54	general	Protein-Ligand	2.3	IC50=0.2nM	IC50	9.7	2013	Alternative oxidase, mitochondrial	RNB	Q26710	C18H23ClO3	322.826	322.134	45	45	57.53	6	5.11	2	3	8	O=Cc1c(O)c(C/C=C(/CCC=C(C)C)\C)c(c(c1C)Cl)O	1	C353H115Fe2N86O95S3+6	train	Fe
3w5e	general	Protein-Ligand	2.3	IC50=11nM	IC50	7.96	2013	cAMP-specific 3',5'-cyclic phosphodiesterase 4B	NVW	Q07343	C25H28N4O3S	464.58	464.188	61	64	109.43	3.6	5.61	2	5	7	O=C(NC(C)(C)C)Cc1ccc(cc1)Nc1nc(nc2c1S(=O)(=O)CCC2)c1ccccc1	1	C434H139CaN112O124S5Zn+10	test	ZnCa
3wab	general	Protein-Ligand	2.15	IC50=34nM	IC50	7.47	2013	Carboxypeptidase B	DDW	P09955	C8H18NO2S	192.299	192.106	30	29	103.74	-0.36	0.42	1	2	7	SC[C@@H](C(=O)O)CCCCC[NH3+]	1	C302H97N74O92SZn2+3	valid	Zn
3way	general	Protein-Ligand	1.75	IC50=22nM	IC50	7.66	2013	Ectonucleotide pyrophosphatase/phosphodiesterase family member 2	DWY	Q9R1E6	C21H21BCl2N3O3S	477.192	476.077	52	55	102.87	3.92	1.99	3	3	7	O=C1N=C(S/C/1=C\c1ccc(c(c1)Cl)Cl)N1CC[N@H+](CC1)Cc1ccc(cc1)B(O)O	1	C374H127N88O87SZn2+8	train	Zn
3wc7	general	Protein-Ligand	1.9	IC50=5.5nM	IC50	8.26	2013	Carboxypeptidase B	EF1	P09955	C21H37N2O5P	428.503	428.244	66	66	148.09	0.63	2.44	2	5	14	[NH3+]CCCCC[C@@H](C(=O)O)CP([C@H](C(C)C)NC(=O)CCc1ccccc1)(O)O	1	C349H109N89O108S2Zn+6	train	Zn
3wd9	general	Protein-Ligand	2.5	IC50=8.3nM	IC50	8.08	2013	cAMP-specific 3',5'-cyclic phosphodiesterase 4B	QPC	Q07343	C24H27N5O2	417.503	417.216	58	60	110	4.11	4.86	3	4	9	O=C(Cc1ccc(cc1)Nc1nc(ncc1C(=O)N)c1ccccc1)NCC(C)(C)C	1	C373H137CaN94O105S3Zn+7	train	ZnCa
3wf8	general	Protein-Ligand	1.98	IC50=232nM	IC50	6.63	2014	Ribosomal protein S6 kinase beta-1, S6K1	F76	P23443	C23H23N3O5S	453.511	453.136	55	58	136.83	3.28	4.8	2	5	7	O=C(Nc1ccc(cc1)S(=O)(=O)N)COC(=O)c1c2CCCCCc2nc2c1cccc2	1	C318H95N77O85S4Zn+7	train	Zn
3wf9	general	Protein-Ligand	2.04	IC50=567nM	IC50	6.25	2014	Ribosomal protein S6 kinase beta-1, S6K1	FS7	P23443	C24H25N3O5S	467.537	467.151	58	61	136.83	3.39	5.05	2	5	7	C[C@H]1CCc2c(C1)c(C(=O)O[C@H](C(=O)Nc1ccc(cc1)S(=O)(=O)N)C)c1c(n2)cccc1	1	C303H94N75O82S5Zn+7	test	Zn
3wi2	general	Protein-Ligand	2.26	IC50=92nM	IC50	7.04	2013	cAMP and cAMP-inhibited cGMP 3',5'-cyclic phosphodiesterase 10A	P98	Q9Y233	C26H23N3O	393.48	393.184	53	57	39.94	6.03	6.28	0	2	5	CC(c1nc2c(n1c1ccccc1)cc(cc2)OCc1ccc2c(n1)cccc2)C	1	C292H103MgN74O87S4Zn+5	test	ZnMg
3wig	general	Protein-Ligand	2.7	Kd=2.30nM	Kd	8.64	2014	Dual specificity mitogen-activated protein kinase kinase 1, Human MEK1 kinase	CHU	Q02750	C21H18FN5O5S	471.462	471.101	51	54	144.69	1.96	4.23	2	6	7	CNS(=O)(=O)Nc1nccc(c1F)Cc1c(=O)oc2c(c1C)ccc(c2)Oc1ncccn1	1	C376H126MgN96O102S8+8	train	Mg
3wqm	general	Protein-Ligand	2.1	Kd=560nM	Kd	6.25	2014	Diterpene synthase Rv3378c	B29	P9WJ61	C20H20O8P2	450.316	450.063	50	53	181.93	0.97	2.92	1	7	4	OP(C(P(O)(O)O)(Cc1cccc(c1)c1cccc2c1oc1c2cccc1)O)(O)O	1	C298H99MgN81O76S+10	train	Mg
3ws8	general	Protein-Ligand	2.6	IC50=210nM	IC50	6.68	2014	cAMP and cAMP-inhibited cGMP 3',5'-cyclic phosphodiesterase 10A, PDE10A	X4C	Q9Y233	C23H21N5	367.446	367.18	49	53	48.01	5.34	4.47	0	3	4	Cc1ccc2c(c1)nc(n2c1ccccc1)CCc1nc(c2n1cccn2)C	1	C277H97MgN66O79S3Zn+4	train	ZnMg
3ws9	general	Protein-Ligand	2.99	IC50=92nM	IC50	7.04	2014	cAMP and cAMP-inhibited cGMP 3',5'-cyclic phosphodiesterase 10A, PDE10A	X4D	Q9Y233	C22H19N5	353.42	353.164	46	50	48.01	4.24	4.16	0	3	4	Cc1ccc2c(c1)nc(n2c1ccccc1)CCc1ncc2n1nccc2	1	C281H88N67O77S4Zn+5	train	Zn
3wv1	general	Protein-Ligand	1.98	IC50=0.0039nM	IC50	11.41	2015	catalytic domain of MMP-13	WHH	P45452	C26H22FN3O6	491.468	491.149	58	61	130.61	4.51	3.71	2	4	9	COc1cccc(c1)CNC(=O)c1nc2ccc(c(c2c(=O)[nH]1)OCCc1ccc(cc1)C(=O)O)F	1	C324H100N76O86S3Zn+7	train	Zn
3wv2	general	Protein-Ligand	2.3	IC50=12nM	IC50	7.92	2014	catalytic domain of MMP-13	WGG	P45452	C17H15N3O3	309.319	309.111	38	40	84.08	1.87	2.25	2	2	5	COc1cccc(c1)CNC(=O)c1nc2ccccc2c(=O)[nH]1	1	C285H83N65O71S2Zn+6	valid	Zn
3wv3	general	Protein-Ligand	1.6	IC50=24nM	IC50	7.62	2014	catalytic domain of MMP-13	WLL	P45452	C15H13N3O3S	315.347	315.068	35	37	112.32	1.88	2.31	2	2	5	COc1cccc(c1)CNC(=O)c1nc2sccc2c(=O)[nH]1	1	C266H79N62O64S2Zn+7	test	Zn
3wyk	general	Protein-Ligand	2.5	IC50=23nM	IC50	7.64	2014	catalytic domain of PDE10A	3KG	Q9Y233	C20H13F3N4O	382.339	382.104	41	44	52.71	4.4	4.1	0	2	3	O=c1ccn(nc1c1ccnn1c1ccccc1)c1cccc(c1)C(F)(F)F	1	C301H117MgN71O87S6Zn+3	train	ZnMg
3wyl	general	Protein-Ligand	2.68	IC50=1.4nM	IC50	8.85	2014	catalytic domain of PDE10A	3KB	Q9Y233	C21H15F3N4O2	412.365	412.115	45	48	61.94	4.59	4.11	0	2	4	COc1cn(nc(c1=O)c1ccnn1c1ccccc1)c1cccc(c1)C(F)(F)F	1	C340H118MgN85O98S6Zn+4	train	ZnMg
3wym	general	Protein-Ligand	2	IC50=0.30nM	IC50	9.52	2014	catalytic domain of PDE10A	3K9	Q9Y233	C23H17FN6O2	428.418	428.14	49	53	79.76	3.77	3.42	0	3	5	COc1cn(nc(c1=O)c1ccnn1c1ccccc1)c1ccc(cc1F)n1cccn1	1	C326H120MgN81O91S7Zn+6	train	ZnMg
3zdv	refined	Protein-Ligand	1.41	Kd=3.3uM	Kd	5.48	2013	FUCOSE-BINDING LECTIN PA-IIL	F1A-MMA	Q9HYN5	C16H25NO7S	375.437	375.135	50	51	133.7	0.39	0.82	4	5	8	CO[C@H]1O[C@H](CNS(=O)(=O)c2c(C)cc(cc2C)C)[C@H]([C@@H]([C@@H]1O)O)O	1	C136H56Ca2N48O63+2	train	Ca
3zhx	refined	Protein-Ligand	2	Kd=0.21uM	Kd	6.68	2013	1-DEOXY-D-XYLULOSE 5-PHOSPHATE REDUCTOISOMERASE	FM6	P9WNS1	C16H17Cl2NO5P	405.19	404.022	42	43	114.82	2.04	3.7	1	5	7	ON(C(=O)c1ccccc1)CC[C@H](P(O)(O)O)c1ccc(c(c1)Cl)Cl	1	C257H96MnN73O87S2+4	train	Mn
3znc	general	Protein-Ligand	2.8	IC50=45.3nM	IC50	7.34	1999	carbonic anhydrase iv	BZ1	Q64444	C12H22N3O5S3	384.515	384.072	45	46	168.38	-0.26	1.86	2	4	7	COCCCN1C[C@H]([NH2+]CC)c2c(S1(=O)=O)sc(c2)S(=O)(=O)N	1	C295H96N85O78S3Zn+10	test	Zn
3znr	refined	Protein-Ligand	2.4	Ki=36nM	Ki	7.44	2013	HISTONE DEACETYLASE 7	NU9	Q8WUI4	C25H23F3N4O3S	516.535	516.144	59	63	114.58	4.8	5.66	2	3	7	O=C(c1cccc(c1)c1noc(n1)C(F)(F)F)NCC1(CCOCC1)[C@@H]1SC=C(N1)c1ccccc1	1	C252H82N79O78S2Zn+7	train	Zn
3zns	refined	Protein-Ligand	2.45	Ki=39nM	Ki	7.41	2013	HISTONE DEACETYLASE 7	NU7	Q8WUI4	C26H25F3N5O2S	528.569	528.168	62	66	113.59	5.01	5.82	2	4	7	C[N@@H+]1CC[C@](CC1)(CNC(=O)c1cccc(c1)c1noc(n1)C(F)(F)F)c1scc(n1)c1ccccc1	1	C274H91KN88O80S2Zn+10	train	Zn
3zuk	general	Protein-Ligand	2.6	Ki=35nM	Ki	7.46	2011	ENDOPEPTIDASE, PEPTIDASE FAMILY M13	RDF	O53649	C23H35N3O10P	544.512	544.206	72	74	227.42	0.65	0.57	6	8	14	CC(C[C@@H](C(=O)N[C@H](C(=O)O)Cc1c[nH]c2c1cccc2)NP(O[C@@H]1O[C@@H](C)[C@@H]([C@H]([C@H]1O)O)O)(O)O)C	1	C378H131N103O103S2Zn+9	train	Zn
3zxh	general	Protein-Ligand	1.3	IC50=3.0nM	IC50	8.52	2011	MMP-13	E41	P45452	C20H28N2O4S	392.512	392.177	55	56	95.09	4.23	4.88	2	4	10	ONC(=O)[C@H](N(S(=O)(=O)c1ccc2c(c1)cccc2)CCC(C)C)C(C)C	1	C283H84CaN63O68SZn+6	train	ZnCa
3zxr	general	Protein-Ligand	2.15	IC50=0.02uM	IC50	7.7	2012	GLUTAMINE SYNTHETASE 1	IQ1	P9WN39	C21H20N4	328.41	328.169	45	48	54.46	4.29	4.98	1	3	3	CC(c1nc(c([nH]1)c1ccncc1)c1cnc2c(c1)cccc2)(C)C	1	C264H99Mg2N72O75S3+6	train	Mg
3zxv	general	Protein-Ligand	2.26	IC50=0.049uM	IC50	7.31	2012	GLUTAMINE SYNTHETASE 1	MXI	P9WN39	C23H24N4O	372.463	372.195	52	55	76.82	4.9	5.76	2	2	4	COc1ccc2c(c1)ccc(c2)c1nc([nH]c1c1ccnc(c1)N)C(C)(C)C	1	C262H93Mg2N73O74S4+6	valid	Mg
3zy2	general	Protein-Ligand	1.54	Kd=0.35uM	Kd	6.46	2011	PUTATIVE GDP-FUCOSE PROTEIN O-FUCOSYLTRANSFERASE 1, POFUT1	GDP	Q18014	C10H17N5O11P2	445.216	445.04	45	47	286.07	-5.72	-2.75	4	9	7	O[C@@H]1[C@@H](COP(OP(O)(O)O)(O)O)O[C@H]([C@@H]1O)n1cnc2c1nc(N)[nH]c2=O	1	C321H105MnN91O94S4+10	train	Mn
3zyb	general	Protein-Ligand	2.29	Kd=4.2uM	Kd	5.38	2011	PA-I GALACTOPHILIC LECTIN LecA	4-mer	Q05097	C17H35N5O3	357.492	357.274	60	60	147.78	-0.49	-0.95	4	3	12	[NH3+]CCCC[C@@H](C(=O)N1CCC[C@H]1C(=O)N[C@H](C(=O)N)CC(C)C)[NH3+]	1	C147H45CaN42O50S+2	valid	Ca
3zyf	refined	Protein-Ligand	1.94	Kd=14.1uM	Kd	4.85	2011	PA-I GALACTOPHILIC LECTIN LecA	147	Q05097	C12H15NO8	301.249	301.08	36	37	145.2	-0.41	-0.7	4	6	7	OC[C@H]1O[C@@H](Oc2ccc(cc2)N(=O)=O)[C@@H]([C@H]([C@H]1O)O)O	1	C139H46CaN37O48S+	train	Ca
3zyh	general	Protein-Ligand	1.5	Kd=51.5uM	Kd	4.29	2011	PA-I GALACTOPHILIC LECTIN	G0S	Q05097	C8H16O5S	224.275	224.072	30	30	115.45	-0.89	-1.46	4	4	7	CCS[C@@H]1O[C@H](CO)[C@@H]([C@@H]([C@H]1O)O)O	1	C134H42CaN34O42S+	valid	Ca
456c	refined	Protein-Ligand	2.4	Ki=0.17nM	Ki	9.77	1999	collagenase 3 (mmp-13)	CBP	P45452	C19H20ClNO6S	425.883	425.07	48	50	110.31	2.3	4.82	2	4	8	ONC(=O)CC1(CCOCC1)S(=O)(=O)c1ccc(cc1)Oc1ccc(cc1)Cl	1	C283H87CaN63O74SZn+4	train	ZnCa
4a22	general	Protein-Ligand	1.9	IC50=3.2nM	IC50	8.49	2011	metallodependent class II fructose-1,6-bisphosphate aldolase (FBA-tb)	TD4	P9WQA3	C6H17NO10P2	325.147	325.033	36	35	207.56	-3.91	-1.67	1	8	9	ON(C(=O)COP(O)(O)O)CCCCOP(O)(O)O	1	C253H93N76Na2O84S3Zn+8	valid	ZnNa
4a50	general	Protein-Ligand	2.75	Ki=12.2nM	Ki	7.91	2012	human kinesin Eg5	DQ6/DQ7	P52732	C24H26NO2	360.469	360.196	53	55	64.94	3.68	3.8	1	2	6	Cc1cccc(c1)C(c1ccccc1)(c1ccccc1)CC[C@@H](C(=O)O)[NH3+]	1	C268H96MgN68O83S+5	train	Mg
4a51	general	Protein-Ligand	2.75	Ki=185.8nM	Ki	6.73	2012	human kinesin Eg5	DQ8	P52732	C23H24NOS	362.508	362.158	50	52	70.01	4.29	4.16	1	1	7	[NH3+]CCSC(c1cccc(c1)C(=O)C)(c1ccccc1)c1ccccc1	1	C269H92MgN69O81S+7	test	Mg
4a6s	refined	Protein-Ligand	2.15	Kd=6.3uM	Kd	5.2	2012	PA-I GALACTOPHILIC LECTIN	GS9	Q05097	C16H18O5S	322.376	322.087	40	42	115.45	1.55	0.73	4	4	7	OC[C@H]1O[C@@H](Sc2ccc3c(c2)cccc3)[C@@H]([C@H]([C@H]1O)O)O	1	C139H46CaN37O48S+	train	Ca
4a6v	general	Protein-Ligand	1.46	IC50=1.9uM	IC50	5.72	2012	METHIONINE AMINOPEPTIDASE	IKY	A0A140NFG5	C11H7F3N2O3	272.18	272.041	26	27	75.36	2	2.87	2	3	4	ONC(=O)c1coc(n1)c1ccccc1C(F)(F)F	1	C264H93Mn2N72O78S5+6	valid	Mn
4a6w	general	Protein-Ligand	1.46	IC50=1.9uM	IC50	5.72	2012	METHIONINE AMINOPEPTIDASE	5C1	A0A140NFG5	C10H7ClN2O3	238.627	238.015	23	24	75.36	1.75	2.5	2	3	4	ONC(=O)c1ncc(o1)c1ccccc1Cl	1	C223H88Mn2N60O67S5+4	train	Mn
4a7b	general	Protein-Ligand	2.2	IC50=39.8nM	IC50	7.4	2011	COLLAGENASE 3(MMP13)	3W5	P45452	C27H31N2O5S	495.61	495.195	66	70	105.52	2.58	4.22	3	4	7	O=C(c1ccc(cc1)Oc1ccc(cc1)C#C[C@]1(O)C[N@@H+]2CC[C@H]1CC2)N[C@H]1CCCS(=O)(=O)C1	1	C289H88CaN66O76S2Zn+5	valid	ZnCa
4aa1	general	Protein-Ligand	1.99	Ki=76uM	Ki	4.12	2012	ANGIOTENSIN-CONVERTING ENZYME, ANCE	8-mer	Q10714 P01019	C26H38N7O5	528.624	528.293	76	78	198.15	0.5	0.42	6	6	16	CC[C@@H]([C@@H](C(=O)N[C@H](C(=O)N1CCC[C@H]1C(=O)N)Cc1nc[nH]c1)NC(=O)[C@H](Cc1ccc(cc1)O)[NH3+])C	1	C415H152N110O116S3Zn+11	train	Zn
4aa2	general	Protein-Ligand	1.99	Ki=107uM	Ki	3.97	2012	ANGIOTENSIN-CONVERTING ENZYME, ANCE	11-mer	P01021 Q10714	C33H61N10O7	709.9	709.472	111	113	277.72	-0.48	-2.79	4	7	22	[NH3+]CCCC[C@@H](C(=O)N[C@H](C(=O)N1CCC[C@H]1C(=O)N1CCC[C@H]1C(=O)O)[C@H](CC)C)NC(=O)[C@@H]1CCCN1C(=O)[C@H](CCC[NH+]=C(N)N)[NH3+]	1	C492H163N127O140S3Zn+10	train	Zn
4acf	general	Protein-Ligand	2	IC50=1.6uM	IC50	5.8	2012	GLUTAMINE SYNTHETASE 1	46B	P9WN39	C19H21BrN3O3	419.292	418.077	47	49	78.45	6.31	3.93	2	2	7	CCCCNc1c([nH]c2[n+]1cc(Br)cc2)c1ccc(cc1)OCC(=O)O	1	C316H117Mg3N86O88S2+8	train	Mg
4aci	refined	Protein-Ligand	1.65	Kd=6mM	Kd	2.22	2012	HTH-TYPE TRANSCRIPTIONAL REPRESSOR ACNR	CIT	Q8NQ97	C6H8O7	192.124	192.027	21	20	132.13	1.76	-1.25	1	7	3	OC(=O)C(CC(=O)O)(CC(=O)O)O	1	C217H67MgN68O59S2+9	test	Mg
4ael	general	Protein-Ligand	2.2	IC50=12nM	IC50	7.92	2012	CAMP AND CAMP-INHIBITED CGMP 3', 5'-CYCLIC PHOSPHODIESTERASE 10A, PDE10A	4HN	Q9Y233	C23H17N3O2	367.4	367.132	45	48	79.03	4.66	4.94	1	4	5	CCOc1ccccc1c1ccc(cc1)c1nc2ccncc2c(c1C#N)O	1	C349H138MgN83O100S7Zn+4	train	ZnMg
4aig	general	Protein-Ligand	2	IC50=0.3uM	IC50	6.52	1998	adamalysin ii	FLX	P34179	C21H27N3O6P	448.429	448.164	58	60	161.41	1.92	3.11	3	5	10	CC(C[C@@H](C(=O)N[C@H](P(O)(O)O)Cc1c[nH]c2c1cccc2)NC(=O)c1ccco1)C	1	C242H85N65O64S4Zn+9	valid	Zn
4an2	general	Protein-Ligand	2.5	IC50=0.9nM	IC50	9.05	2012	DUAL SPECIFICITY MITOGEN-ACTIVATED PROTEIN KINASE KINASE 1, human MEK1	EUI	Q02750	C21H22F3IN3O2	532.318	532.071	52	55	69.18	3.88	4.34	3	2	6	Ic1ccc(c(c1)F)Nc1c(ccc(c1F)F)C(=O)N1CC(C1)(O)[C@@H]1CCCC[NH2+]1	1	C331H114MgN87O91S7+7	valid	Mg
4an3	general	Protein-Ligand	2.1	IC50=0.6nM	IC50	9.22	2012	DUAL SPECIFICITY MITOGEN-ACTIVATED PROTEIN KINASE KINASE 1, human MEK1	5Y0	Q02750	C16H14F3IN2O4	482.193	481.995	40	41	90.82	2.99	2.93	4	3	10	OC[C@@H](CONC(=O)c1ccc(c(c1Nc1ccc(cc1F)I)F)F)O	1	C302H105MgN78O89S6+4	train	Mg
4an9	general	Protein-Ligand	2.8	IC50=44nM	IC50	7.36	2012	DUAL SPECIFICITY MITOGEN-ACTIVATED PROTEIN KINASE KINASE 1, human MEK1	2P7	Q02750	C16H12F3IN2O2	448.178	447.99	36	38	52.57	3.58	3.28	2	2	5	OC1CN(C1)C(=O)c1ccc(c(c1Nc1ccc(cc1F)I)F)F	1	C289H105MgN74O81S6+6	test	Mg
4anb	general	Protein-Ligand	2.2	IC50=6.6nM	IC50	8.18	2012	DUAL SPECIFICITY MITOGEN-ACTIVATED PROTEIN KINASE KINASE 1, human MEK1	YQY	Q02750	C17H16F3IN3O2	478.228	478.024	42	44	80.21	2.46	1.89	3	2	6	[NH3+]CC1(O)CN(C1)C(=O)c1ccc(c(c1Nc1ccc(cc1F)I)F)F	1	C307H107MgN79O83S7+6	train	Mg
4aoc	general	Protein-Ligand	2.7	Kd=53.8uM	Kd	4.27	2012	BC2L-A LECTIN	A1Q	A0A0H2Y045	C8H16O7	224.208	224.09	31	31	119.61	-2.67	-3.21	5	5	8	OC[C@@H]([C@H]1O[C@H](OC)[C@H]([C@H]([C@@H]1O)O)O)O	1	C129H57Ca2N41O54+3	test	Ca
4aph	general	Protein-Ligand	1.99	Ki=4.0uM	Ki	5.4	2012	Human angiotensin-converting enzyme	8-mer	P12821 P01019	C35H58N12O7	758.911	758.455	112	113	331.15	1.56	-0.67	9	8	28	CC[C@@H]([C@@H](C(=O)N[C@H](C(=O)N)Cc1c[nH]cn1)NC(=O)[C@H](Cc1ccc(cc1)O)NC(=O)[C@H](C(C)C)NC(=O)[C@@H](NC(=O)[C@@H]([NH3+])C)CCC[NH+]=C(N)N)C	1	C525H176N131O135S3Zn+12	train	Zn
4aq6	refined	Protein-Ligand	1.98	Kd=15.8uM	Kd	4.8	2013	HOMOGENTISATE 1,2-DIOXYGENASE	OMD	Q88E47	C8H8O4	168.147	168.042	20	20	77.76	2.12	0.72	2	4	3	OC(=O)Cc1cc(O)ccc1O	1	C287H96FeN72O68S3+7	valid	Fe
4ark	general	Protein-Ligand	2.6	IC50=63nM	IC50	7.2	2013	DUAL SPECIFICITY MITOGEN-ACTIVATED PROTEIN KINASE KINASE 1	M3K	Q02750	C17H17F2IN2O4	478.229	478.02	43	44	104.81	2.77	3.31	4	3	10	OC[C@@H](CCOc1cc(F)cc(c1C(=O)N)Nc1ccc(cc1F)I)O	1	C315H110MgN84O86S7+6	train	Mg
4ask	general	Protein-Ligand	1.86	IC50=60nM	IC50	7.22	2012	LYSINE-SPECIFIC DEMETHYLASE 6B	K0I	O15054	C22H23N5O2	389.45	389.185	52	55	91.24	5.09	3.17	1	5	5	OC(=O)CCNc1cc(nc(n1)c1ccccn1)N1CCc2c(CC1)cccc2	1	C368H113CoN103O100S5+6	train	XX
4au7	general	Protein-Ligand	2.07	Kd=17.2uM	Kd	4.76	2013	HISTONE-LYSINE N-METHYLTRANSFERASE SUV420H2	SAH	P62806 Q6Q783	C14H21N6O5S	385.419	385.129	47	49	209.55	-3.47	-1.57	4	7	8	OC(=O)[C@H](CCSC[C@H]1O[C@H]([C@@H]([C@@H]1O)O)n1cnc2c1ncnc2N)[NH3+]	1	C320H101N77O89S7Zn+5	test	Zn
4auy	general	Protein-Ligand	2.1	Kd=18.3nM	Kd	7.74	2012	FimH lectin domain	HNW	P08191	C15H18O7	310.299	310.105	40	41	119.61	-0.73	-1.79	5	5	9	OCC#Cc1ccc(cc1)O[C@H]1O[C@H](CO)[C@H]([C@@H]([C@@H]1O)O)O	1	C176H55N45NiO59S+3	test	XX
4av0	general	Protein-Ligand	2.1	Kd=104.6nM	Kd	6.98	2012	FimH lectin domain	HNV	P08191	C16H20O7	324.326	324.121	43	44	108.61	-0.19	-1.14	4	4	9	OC[C@H]1O[C@H](OCC#Cc2ccc(cc2)OC)[C@H]([C@H]([C@@H]1O)O)O	1	C176H55N45NiO59S+3	test	XX
4avg	general	Protein-Ligand	2.2	IC50=0.06uM	IC50	7.22	2012	POLYMERASE PA	SL6	C3W5S0	C23H31ClNO4	420.95	420.194	60	62	75.88	3.4	4.31	1	4	7	Clc1ccc(cc1)C[C@@]1(CC[N@@H+](CC1)CC1CCCCC1)C(=O)CC(=O)C(=O)O	1	C285H99Mn2N67O74S6+9	test	Mn
4avh	refined	Protein-Ligand	2.1	Kd=59.5nM	Kd	7.23	2012	FimH lectin domain	FK9	P08191	C12H24O6S	296.38	296.129	43	43	124.68	-0.15	-0.66	4	4	12	CCCSCCCO[C@H]1O[C@H](CO)[C@H]([C@@H]([C@@H]1O)O)O	1	C176H55N45NiO59S+3	train	XX
4avi	refined	Protein-Ligand	2.4	Kd=23.6nM	Kd	7.63	2012	FimH lectin domain	XNS	P08191	C16H30O8	350.405	350.194	54	54	125.68	0.47	-0.29	4	5	16	COC(=O)CCCCCCCCO[C@H]1O[C@H](CO)[C@H]([C@@H]([C@@H]1O)O)O	1	C176H55N45NiO59S+3	test	XX
4avj	refined	Protein-Ligand	2.1	Kd=36.5nM	Kd	7.44	2012	FimH lectin domain	J73	P08191	C17H23N3O7	381.38	381.154	50	52	150.32	-1.43	-1.81	5	7	12	OC[C@H]1O[C@H](Oc2ccc(cc2)CCn2nnc(c2)CO)[C@H]([C@H]([C@@H]1O)O)O	1	C176H55N45NiO59S+3	test	XX
4avs	refined	Protein-Ligand	1.4	Kd=322uM	Kd	3.49	2013	SERUM AMYLOID P-COMPONENT	N7P	P02743	C7H11NO3	157.167	157.074	22	22	57.61	0.72	0.02	0	3	1	CC(=O)N1CCC[C@H]1C(=O)O	1	C132H58Ca2N35O46+4	test	Ca
4aw8	general	Protein-Ligand	2	Kd=22nM	Kd	7.66	2013	METAL-BINDING PROTEIN YODA	ZN	A0A315GY36	C12H24O6	264.315	264.157	42	42	55.38	-0.75	0.1	0	0	8	COCCO[C@@H]1COCCOC[C@H]1OCCOC	1	C304H102N73O76S2Zn+11	train	Zn
4awf	general	Protein-Ligand	2.3	IC50=2.7uM	IC50	5.57	2012	POLYMERASE PA	XI7	C3W5S0	C10H8O4	192.168	192.042	22	22	71.44	2.07	0.91	0	4	3	O=C(c1ccccc1)CC(=O)C(=O)O	1	C246H87Mn2N65O59S2+8	train	Mn
4awg	general	Protein-Ligand	2.6	IC50=1.1uM	IC50	5.96	2012	POLYMERASE PA	CI3	C3W5S0	C23H25ClNO4	414.902	414.147	54	56	79.04	3.12	4.41	1	4	7	Clc1ccc(cc1)C[C@]1(CCC[N@@H+](C1)Cc1ccccc1)C(=O)/C=C(/C(=O)O)\O	1	C310H105Mn2N76O77S4+9	train	Mn
4awk	general	Protein-Ligand	1.9	IC50=0.13uM	IC50	6.89	2012	POLYMERASE PA	CI1	C3W5S0	C23H24ClNO6S	477.958	477.101	56	58	117.2	4.05	4.13	0	6	8	Clc1ccc(cc1)C[C@]1(CCCN(C1)S(=O)(=O)Cc1ccccc1)C(=O)CC(=O)C(=O)O	1	C315H111Mn2N79O88S3+10	train	Mn
4awm	general	Protein-Ligand	2.6	IC50=1.9uM	IC50	5.72	2012	POLYMERASE PA	KDH	C3W5S0	C22H18O11	458.372	458.085	51	54	197.37	2.23	2.23	8	9	12	Oc1cc(O)c2c(c1)O[C@@H]([C@@H](C2)OC(=O)c1cc(O)c(c(c1)O)O)c1cc(O)c(c(c1)O)O	1	C303H103Mn2N80O80S2+10	train	Mn
4ayp	refined	Protein-Ligand	0.85	Kd=755nM	Kd	6.12	2013	MANNOSYL-OLIGOSACCHARIDE 1,2-ALPHA-MANNOSIDASE	SMD	B0SWV2	C13H24O10S	372.389	372.109	48	49	194.6	-2.85	-4.03	7	7	12	CO[C@H]1O[C@H](CO)[C@H]([C@@H]([C@@H]1S[C@H]1O[C@H](CO)[C@H]([C@@H]([C@@H]1O)O)O)O)O	1	C332H115CaN77O106+3	test	Ca
4ayq	refined	Protein-Ligand	1.1	Kd=47nM	Kd	7.33	2013	MANNOSYL-OLIGOSACCHARIDE 1,2-ALPHA-MANNOSIDASE	MVL	B0SWV2	C8H12N2O4	200.192	200.08	26	27	98.74	-2.43	-1.81	4	5	5	OC[C@@H]1[C@@H](O)[C@H](O)[C@@H](c2n1ccn2)O	1	C260H103CaN57O88+2	train	Ca
4ayr	general	Protein-Ligand	1.1	Kd=99nM	Kd	7	2013	MANNOSYL-OLIGOSACCHARIDE 1,2-ALPHA-MANNOSIDASE	IFL	B0SWV2	C6H14NO4	164.18	164.092	25	25	97.53	-2.06	-2.22	5	4	5	OC[C@H]1C[NH2+][C@H]([C@H]([C@@H]1O)O)O	1	C264H93CaN58O86+2	train	Ca
4ayt	general	Protein-Ligand	2.85	Ki=0.2mM	Ki	3.7	2012	ATP-BINDING CASSETTE SUB-FAMILY B MEMBER 10 MITOCHONDRIAL	ACP	Q9NRK6	C11H21N5O12P3	508.232	508.04	52	54	320.15	-6.21	-2.25	3	12	9	O[C@@H]1[C@@H](COP(OP(CP(O)(O)O)(O)O)(O)O)O[C@H]([C@@H]1O)n1cnc2c1ncnc2N	1	C238H99Mg2N64O81+5	train	Mg
4ayu	refined	Protein-Ligand	1.5	Kd=18.6uM	Kd	4.73	2013	Serum Amyloid P Component	N8P	P02743	C7H11NO3	157.167	157.074	22	22	57.61	0.72	0.02	0	3	1	CC(=O)N1CCC[C@@H]1C(=O)O	1	C154H61Ca2N45O53+5	train	Ca
4ayx	general	Protein-Ligand	2.9	Ki=0.2mM	Ki	3.7	2012	ATP-BINDING CASSETTE SUB-FAMILY B MEMBER 10	ACP	Q9NRK6	C11H21N5O12P3	508.232	508.04	52	54	320.15	-6.21	-2.25	3	12	9	O[C@@H]1[C@@H](COP(OP(CP(O)(O)O)(O)O)(O)O)O[C@H]([C@@H]1O)n1cnc2c1ncnc2N	1	C207H77MgN54O62+5	test	Mg
4az3	general	Protein-Ligand	2.04	IC50=0.005uM	IC50	8.3	2012	LYSOSOMAL PROTECTIVE PROTEIN, Cathepsin A	S35	P10619	C26H30FN3O5	483.532	483.217	65	67	113.68	5.85	4.44	2	5	11	OC(=O)C[C@@H](c1ccccc1C)NC(=O)c1cc(n(n1)c1ccccc1F)OC[C@@H](C(C)(C)C)O	1	C354H113CdN95O116S8+3	train	XX
4azc	refined	Protein-Ligand	2.09	Kd=1.38uM	Kd	5.86	2013	BETA-N-ACETYLHEXOSAMINIDASE	NGW	P49610	C8H16NO4S	222.282	222.08	30	31	111.83	-0.7	-0.98	4	3	4	OC[C@H]1O[C@@H]2S[C@H]([NH2+][C@@H]2[C@H]([C@@H]1O)O)C	1	C270H110MgN71O82S2+4	train	Mg
4b5s	refined	Protein-Ligand	1.68	Kd=0.32mM	Kd	3.49	2012	4-HYDROXY-2-OXO-HEPTANE-1,7-DIOATE ALDOLASE	PYR	B1IS70	C3H4O3	88.062	88.016	10	9	54.37	0.56	-0.34	0	3	0	OC(=O)C(=O)C	1	C196H81CoMgN47O50S+	train	Mg
4b5t	refined	Protein-Ligand	1.92	Kd=0.47mM	Kd	3.33	2012	4-HYDROXY-2-OXO-HEPTANE-1,7-DIOATE ALDOLASE	2KT	B1IS70	C4H6O3	102.089	102.032	13	12	54.37	1.03	0.05	0	3	1	CCC(=O)C(=O)O	1	C196H84CoMgN49O53S+2	test	Mg
4b5w	refined	Protein-Ligand	1.79	Kd=0.47mM	Kd	3.33	2012	4-HYDROXY-2-OXO-HEPTANE-1,7-DIOATE ALDOLASE(R70A mutant)	PYR	B1IS70	C3H6O3	90.078	90.032	12	11	57.53	0.42	-0.55	1	3	1	OC(=O)[C@H](O)C	1	C216H74CoN50O57S+	train	XX
4bb4	general	Protein-Ligand	1.65	IC50=190nM	IC50	6.72	2013	EPHRIN TYPE-B RECEPTOR 4	32W	P54760	C23H21N5O2	399.445	399.17	51	54	89.03	3.1	4.28	2	4	8	COCCNC(=O)c1ccc(cc1)Nc1ncc2c(n1)ccc(c2)c1ccncc1	1	C300H101MgN84O88S4+9	train	Mg
4bbg	general	Protein-Ligand	2.75	Ki=4.8nM	Ki	8.32	2013	KINESIN-LIKE PROTEIN KIF11	V02	P52732	C23H26NOS	364.524	364.174	52	54	73.17	5.05	4.22	2	1	8	[NH3+]CCS[C@@](c1cccc(c1)O)(c1cccc(c1)CC)c1ccccc1	1	C267H88MgN69O79S+6	valid	Mg
4bf1	refined	Protein-Ligand	1.35	Ki=2.4nM	Ki	8.62	2014	human carbonic anhydrase II	9FK	P00918	C16H12N4O2S2	356.422	356.04	36	39	127.49	2.87	4.58	1	4	3	NS(=O)(=O)c1ccc(s1)c1nnn(c1)c1cccc2c1cccc2	1	C341H103N87O78SZn+7	test	Zn
4bf6	refined	Protein-Ligand	1.82	Ki=4.5nM	Ki	8.35	2014	human carbonic anhydrase II	X0Q	P00918	C13H9N5O2S2	331.373	331.02	31	33	151.28	1.34	3.3	1	5	3	N#Cc1cccc(c1)n1nnc(c1)c1ccc(s1)S(=O)(=O)N	1	C282H89N73O65SZn+5	test	Zn
4bg1	general	Protein-Ligand	1.89	IC50=0.49uM	IC50	6.31	2014	human gamma-butyrobetaine hydroxylase	IVL	O75936	C9H18NO2	172.245	172.134	30	30	37.3	2.07	1.05	0	2	3	OC(=O)CCC[N+]1(C)CCCC1	1	C281H101N73O79Zn+5	train	Zn
4bgk	general	Protein-Ligand	2.18	IC50=520nM	IC50	6.28	2014	human gamma-butyrobetaine hydroxylase	RTK	O75936	C6H18NO2P	167.186	167.108	28	27	54.05	-0.8	0.11	0	2	4	OP(CCC[N+](C)(C)C)O	1	C264H99N69O76Zn+5	valid	Zn
4bgm	general	Protein-Ligand	2.4	IC50=0.61uM	IC50	6.21	2014	human gamma-butyrobetaine hydroxylase	DLT	O75936	C8H17FNO2	178.224	178.124	29	28	37.3	1.92	0.9	0	2	5	FCC[N+](CCCC(=O)O)(C)C	1	C287H105N74O80Zn+5	train	Zn
4bhf	general	Protein-Ligand	2.05	IC50=343uM	IC50	3.46	2014	human gamma-butyrobetaine hydroxylase	MZT	O75936	C8H18NO2	160.234	160.134	29	28	37.3	2.01	0.95	0	2	3	C[C@@H]([N+](C)(C)C)CCC(=O)O	1	C267H99N71O75Zn+5	valid	Zn
4bhi	general	Protein-Ligand	2.15	IC50=90nM	IC50	7.05	2014	human gamma-butyrobetaine hydroxylase	RUJ	O75936	C7H18N2O2	162.23	162.137	29	28	41.74	-0.83	-1.4	1	2	3	OC(=O)CC[N@@H+]([N+](C)(C)C)C	1	C264H99N69O76Zn+5	valid	Zn
4bio	general	Protein-Ligand	2.45	IC50=7.6uM	IC50	5.12	2013	HYPOXIA-INDUCIBLE FACTOR 1-ALPHA INHIBITOR	8XQ	Q9NWT6	C10H7NO3	189.167	189.043	21	22	70.42	2.45	1.64	1	4	1	OC(=O)c1ccc(c2c1cccn2)O	1	C237H84FeN64O64S2+7	valid	Fe
4bis	general	Protein-Ligand	2.49	IC50=1.4uM	IC50	5.85	2014	LYSINE-SPECIFIC DEMETHYLASE 4A, JMJD2A	8HQ	O75164	C10H7NO3	189.167	189.043	21	22	70.42	2.45	1.64	1	4	1	OC(=O)c1ccnc2c1cccc2O	1	C279H97N67NiO81S2+4	train	XX
4bqw	general	Protein-Ligand	1.79	IC50=0.033uM	IC50	7.48	2013	EGL NINE HOMOLOG 1	QNM	Q9GZT9	C13H12N2O5	276.245	276.075	32	33	108.63	1.95	0.45	2	5	4	OC(=O)CNC(=O)c1c(O)c2ccccc2n(c1=O)C	1	C281H98MnN76O76S3+7	train	Mn
4bqx	general	Protein-Ligand	1.79	IC50=0.3uM	IC50	6.52	2013	EGL NINE HOMOLOG 1	UN9	Q9GZT9	C12H9ClN2O4	280.664	280.025	28	29	99.52	3.35	1.8	2	5	4	OC(=O)CNC(=O)c1nc(Cl)c2c(c1O)cccc2	1	C296H102MnN78O76S3+8	train	Mn
4bqy	general	Protein-Ligand	1.53	IC50=1.1uM	IC50	5.96	2013	EGL NINE HOMOLOG 1	FNT	Q9GZT9	C13H11ClN2O4	294.69	294.041	31	32	99.52	3.75	2.19	2	5	4	OC(=O)[C@@H](NC(=O)c1nc(Cl)c2c(c1O)cccc2)C	1	C295H96FeN75O76S3+6	test	Fe
4bt3	refined	Protein-Ligand	1.1	Ki=0.76mM	Ki	3.12	2013	ALPHA-ACETOLACTATE DECARBOXYLASE	WTZ	P23616	C5H10O4	134.13	134.058	19	18	77.76	-0.01	-0.8	2	4	3	C[C@H]([C@](C(=O)O)(O)C)O	1	C242H93N58O62S2Zn+3	train	Zn
4bt4	refined	Protein-Ligand	1.6	Ki=0.46mM	Ki	3.34	2013	ALPHA-ACETOLACTATE DECARBOXYLASE	QFH	P23616	C5H10O4	134.13	134.058	19	18	77.76	-0.01	-0.8	2	4	3	C[C@@H]([C@@](C(=O)O)(O)C)O	1	C240H95N61O69S2Zn+3	train	Zn
4bt5	refined	Protein-Ligand	1.1	Ki=1.72mM	Ki	2.76	2013	ALPHA-ACETOLACTATE DECARBOXYLASE	23B	P23616	C5H10O4	134.13	134.058	19	18	77.76	-0.01	-0.8	2	4	3	C[C@H]([C@@](C(=O)O)(O)C)O	1	C228H90N59O64S2Zn+4	train	Zn
4bxk	general	Protein-Ligand	2.2	Ki=11.21nM	Ki	7.95	2013	ANGIOTENSIN-CONVERTING ENZYME	1IU	P12821	C19H31N8O5P	482.474	482.216	64	65	237.44	-1.85	-1.02	5	8	14	O=C([C@@H](CP([C@H](Cc1ccccc1)NC(=O)[C@@H](Cc1nnn[nH]1)[NH3+])(O)O)C)N[C@H](C(=O)N)C	1	C388H141N108O106S3Zn+13	train	Zn
4bzr	general	Protein-Ligand	1.84	IC50=25nM	IC50	7.6	2014	Human testis angiotensin converting enzyme	K26	P12821	C25H35N3O8P	536.534	536.216	72	73	202.04	1.37	2.27	5	8	16	CC[C@@H]([C@@H](C(=O)N[C@H](C(=O)N[C@H](P(O)(O)O)Cc1ccc(cc1)O)Cc1ccc(cc1)O)NC(=O)C)C	1	C400H127N102O101S3Zn+9	test	Zn
4bzs	general	Protein-Ligand	2.1	Ki=75nM	Ki	7.12	2014	Human angiotenisn converting enzyme N-domain	K26	P12821	C25H35N3O8P	536.534	536.216	72	73	202.04	1.37	2.27	5	8	16	CC[C@@H]([C@@H](C(=O)N[C@H](C(=O)N[C@H](P(O)(O)O)Cc1ccc(cc1)O)Cc1ccc(cc1)O)NC(=O)C)C	1	C394H131N109O105SZn+11	test	Zn
4c0r	general	Protein-Ligand	1.55	Kd=12.2uM	Kd	4.91	2013	PUTATIVE AMINO ACID BINDING PROTEIN	GDS	Q93DA5	C16H29N5O9S2	499.56	499.141	61	60	294.05	-5.18	-3.54	5	9	17	C[NH2+][C@H](C(=O)NCC(=O)O)CSSC[C@@H](C(=O)NCC(=O)O)NC(=O)CC[C@@H](C(=O)O)[NH3+]	1	C266H97Cd5N70O87+2	train	XX
4c16	general	Protein-Ligand	1.93	Kd=11.04uM	Kd	4.96	2014	four-domain fragment of the extracellular region of E-selectin	4-mer	P16581	C28H48O13	592.673	592.309	89	92	204.83	2.09	-0.35	6	8	15	OC[C@H]1O[C@@H](O[C@@H]2CCC[C@@H]([C@H]2O[C@@H]2O[C@@H](C)[C@H]([C@H]([C@@H]2O)O)O)C)[C@@H]([C@H]([C@H]1O)O[C@H](C(=O)O)CC1CCCCC1)O	1	C209H64CaN58O60S+8	train	Ca
4c1c	general	Protein-Ligand	1.18	IC50=10.7uM	IC50	4.97	2014	metallo-beta-lactamase BCII	MCO	P04190	C9H15NO3S	217.285	217.077	29	29	96.41	1.52	0.57	0	3	4	SC[C@H](C(=O)N1CCC[C@@H]1C(=O)O)C	1	C183H65N57O52SZn2+6	train	Zn
4c1d	general	Protein-Ligand	1.2	IC50=4.4uM	IC50	5.36	2014	metallo-beta-lactamase VIM-2	X8Z	Q9K2N0	C9H15NO3S	217.285	217.077	29	29	96.41	1.52	0.57	0	3	4	SC[C@H](C(=O)N1CCC[C@H]1C(=O)O)C	1	C203H76N62O65SZn2+5	train	Zn
4c1e	general	Protein-Ligand	1.4	IC50=0.072uM	IC50	7.14	2014	metallo-beta-lactamase VIM-2	MCO	Q9K2N0	C9H15NO3S	217.285	217.077	29	29	96.41	1.52	0.57	0	3	4	SC[C@H](C(=O)N1CCC[C@@H]1C(=O)O)C	1	C197H74N61O63SZn2+5	test	Zn
4c1f	general	Protein-Ligand	2.01	IC50=23.3uM	IC50	4.63	2014	metallo-beta-lactamase IMP-1	X8Z	P52699	C9H15NO3S	217.285	217.077	29	29	96.41	1.52	0.57	0	3	4	SC[C@H](C(=O)N1CCC[C@H]1C(=O)O)C	1	C196H65N55O57SZn2+5	train	Zn
4c1g	general	Protein-Ligand	1.71	IC50=7.2uM	IC50	5.14	2014	metallo-beta-lactamase IMP-1	MCO	P52699	C9H15NO3S	217.285	217.077	29	29	96.41	1.52	0.57	0	3	4	SC[C@H](C(=O)N1CCC[C@@H]1C(=O)O)C	1	C208H62N56O57SZn2+6	train	Zn
4c1h	general	Protein-Ligand	1.1	IC50=80.4uM	IC50	4.09	2014	metallo-beta-lactamase BCII	X8Z	P04190	C9H15NO3S	217.285	217.077	29	29	96.41	1.52	0.57	0	3	4	SC[C@H](C(=O)N1CCC[C@H]1C(=O)O)C	1	C165H65N52O45SZn2+5	train	Zn
4c4n	general	Protein-Ligand	2.36	Kd=0.8uM	Kd	6.1	2013	SONIC HEDGEHOG PROTEIN	6-mer	Q62226	C36H77N3O58S9	1768.57	1767.07	183	188	1240.65	-14.03	-3.47	11	41	30	OC(=O)[C@@H]1O[C@@H](O[C@@H]2[C@@H](COS(O)(O)O)O[C@@H]([C@@H]([C@H]2O)NS(O)(O)O)O[C@@H]2[C@@H](O[C@H]([C@@H]([C@H]2O)OS(O)(O)O)O)C(=O)O)[C@@H]([C@H]([C@@H]1O[C@H]1O[C@H](COS(O)(O)O)[C@H]([C@@H]([C@H]1NS(O)(O)O)O)O[C@@H]1O[C@@H](C(=O)O)[C@H]([C@@H]([C@H]1OS(O)(O)O)O)O[C@H]1O[C@H](COS(O)(O)O)[C@H]([C@@H]([C@H]1NS(O)(O)O)O)O)O)OS(O)(O)O	1	C196H82Ca2N60O66Zn+10	train	ZnCa
4c5w	general	Protein-Ligand	1.7	IC50=3.3uM	IC50	5.48	2014	human gamma-butyrobetaine hydroxylase	NM3	O75936	C7H16NO2	146.207	146.118	26	25	37.3	1.58	0.56	0	2	3	OC(=O)CCC[N+](C)(C)C	1	C267H97N71O75Zn+5	valid	Zn
4c8r	general	Protein-Ligand	2.82	IC50=153nM	IC50	6.82	2014	Human gamma-butyrobetaine dioxygenase (BBOX1)	6YT	O75936	C15H15N3O4S	333.362	333.078	38	39	137.71	2.28	1.69	2	6	8	OC(=O)[C@@H](NC(=O)c1ncccc1O)CSCc1ccccn1	1	C324H111N81NiO84S2+6	train	XX
4ca5	refined	Protein-Ligand	1.85	Ki=0.41nM	Ki	9.39	2013	ANGIOTENSIN-CONVERTING ENZYME	3EF	P12821	C38H39N3O9P	712.705	712.242	90	94	205.04	5.64	6.13	3	8	19	O=C(N[C@H](P(C[C@H](C(=O)N[C@H](C(=O)O)Cc1ccc(cc1)O)Cc1onc(c1)c1ccccc1)(O)O)Cc1ccccc1)OCc1ccccc1	1	C509H165N130O131S2Zn+12	test	Zn
4ca6	refined	Protein-Ligand	1.91	Ki=180nM	Ki	6.74	2013	ANGIOTENSIN-CONVERTING ENZYME N-DOMAIN	3EF	P12821	C38H39N3O9P	712.705	712.242	90	94	205.04	5.64	6.13	3	8	19	O=C(N[C@H](P(C[C@H](C(=O)N[C@H](C(=O)O)Cc1ccc(cc1)O)Cc1onc(c1)c1ccccc1)(O)O)Cc1ccccc1)OCc1ccccc1	1	C542H192N143O142S3Zn+16	test	Zn
4ca7	refined	Protein-Ligand	1.82	Ki=44nM	Ki	7.36	2013	ANGIOTENSIN-CONVERTING ENZYME	3EF	Q10714	C38H39N3O9P	712.705	712.242	90	94	205.04	5.64	6.13	3	8	19	O=C(N[C@H](P(C[C@H](C(=O)N[C@H](C(=O)O)Cc1ccc(cc1)O)Cc1onc(c1)c1ccccc1)(O)O)Cc1ccccc1)OCc1ccccc1	1	C506H177N129O142S3Zn+12	train	Zn
4ca8	refined	Protein-Ligand	1.99	Ki=210nM	Ki	6.68	2013	ANGIOTENSIN-CONVERTING ENZYME	3ES	Q10714	C38H39N3O9P	712.705	712.242	90	94	205.04	5.64	6.13	3	8	19	O=C(N[C@H](P(C[C@@H](C(=O)N[C@H](C(=O)O)Cc1ccc(cc1)O)Cc1onc(c1)c1ccccc1)(O)O)Cc1ccccc1)OCc1ccccc1	1	C513H185N134O149S3Zn+12	train	Zn
4cby	general	Protein-Ligand	2.72	IC50=0.02uM	IC50	7.7	2013	HISTONE DEACETYLASE 4	KEE	P56524	C19H16N2O3	320.342	320.116	40	43	75.36	2.37	3.74	2	3	6	ONC(=O)[C@@H]1[C@@H]([C@H]1c1ccc(cc1)c1cnco1)c1ccccc1	1	C269H92N80O79S2Zn+6	train	Zn
4cjn	general	Protein-Ligand	1.95	Kd=17.54uM	Kd	4.76	2015	Penicillin binding Protein 2 Prime, PBP2a from MRSA	QNZ	A0A0J9X1X5	C24H15N3O3	393.394	393.111	45	48	95.98	4.85	4.13	0	4	3	N#Cc1ccc(cc1)/C=C/c1nc2ccccc2c(=O)n1c1cccc(c1)C(=O)O	1	C235H86Cd2N65O71+5	valid	XX
4cq0	general	Protein-Ligand	1.45	Ki=8106nM	Ki	5.09	2014	CARBONIC ANHYDRASE 2	SXS	P00918	C7H6N2O3S	198.199	198.01	19	20	97.64	-0.28	1.69	2	3	0	Nc1ccc2c(c1)S(=O)(=O)NC2=O	1	C305H92N76O67S2Zn+5	train	Zn
4cqf	general	Protein-Ligand	2.3	IC50=50uM	IC50	4.3	2014	Schistosoma mansoni histone deacetylase 8, HDAC8	9Z8	A5H660	C14H20N2O2S	280.386	280.125	39	39	97	1.74	2.7	2	2	11	SCC(=O)NCCCCCC(=O)Nc1ccccc1	1	C268H83N77O76S3Zn+5	train	Zn
4crj	general	Protein-Ligand	2	Kd=1.1uM	Kd	5.96	2015	Staphylococcus aureus 7,8-Dihydro-6-hydroxymethylpterin- pyrophosphokinase	YH5		C14H13N5O3S	331.35	331.074	36	38	152.05	1.15	1.79	3	3	5	COc1ccc(cc1)C(=O)CSc1nc2c([nH]1)c(=O)[nH]c(n2)N	1	C265H87Mg2N80O74S+9	train	Mg
4cs9	refined	Protein-Ligand	2.01	Kd=8mM	Kd	2.1	2014	asymmetric human metapneumovirus M2-1 tetramer	AMP	Q8QN58	C10H15N5O7P	348.229	348.071	38	40	202.82	-3.71	-1.72	3	8	5	O[C@@H]1[C@H](O)[C@H](O[C@H]1n1cnc2c1ncnc2N)COP(O)(O)O	1	C148H48N45O39S3Zn+8	test	Zn
4csy	general	Protein-Ligand	2.41	Kd=878uM	Kd	3.06	2014	four-domain fragment of the extracellular region of E-selectin	SIA-MAG-GAL-FUC	P16581	C32H54N2O23	834.771	834.312	111	114	391.87	-6.88	-7.79	13	15	27	OC[C@H]([C@H]([C@@H]1O[C@](O[C@@H]2[C@@H](O)[C@@H](O[C@@H]([C@@H]2O)CO)O[C@@H]2[C@@H](CO)O[C@H]([C@@H]([C@H]2O[C@@H]2O[C@@H](C)[C@H]([C@H]([C@@H]2O)O)O)NC(=O)C)OC)(C[C@@H]([C@H]1NC(=O)C)O)C(=O)O)O)O	1	C218H63CaN59O62S+8	test	Ca
4cwb	general	Protein-Ligand	1.56	Kd=0.81uM	Kd	6.09	2015	Staphylococcus aureus 7,8-Dihydro-6-hydroxymethylpterin- pyrophosphokinase	X6L		C19H16N5O2S	378.428	378.102	43	46	144.07	4.09	2.87	1	3	5	O=C(c1ccc(cc1)c1ccccc1)CSc1[nH]c2c(n1)[nH+]c([nH]c2=O)N	1	C277H93Mg2N79O67S2+9	train	Mg
4cxx	general	Protein-Ligand	2.76	IC50=2.11uM	IC50	5.68	2014	human ALPHA-KETOGLUTARATE-DEPENDENT DIOXYGENASE FTO	640	Q9C0B1	C21H25N3O4	383.441	383.185	53	54	108.39	4.11	3.38	2	5	9	O=C(c1cnccc1Cc1ccc(cc1)C(C)(C)C)NNC(=O)CCC(=O)O	1	C375H109N100NiO93S3+12	train	XX
4cxy	general	Protein-Ligand	2.65	IC50=11.8uM	IC50	4.93	2014	human ALPHA-KETOGLUTARATE-DEPENDENT DIOXYGENASE FTO	DGR	Q9C0B1	C10H11N3O4	237.212	237.075	28	28	108.39	0.51	0.49	2	5	6	O=C(NNC(=O)c1cccnc1)CCC(=O)O	1	C294H88N78Ni2O71S3+8	test	XX
4czs	refined	Protein-Ligand	1.73	Kd=10.0uM	Kd	5	2015	concanavalin A (ConA)	5-mer	P81461	C34H45N6O14	761.753	761.299	99	102	328.93	-3.01	-2.74	11	11	27	OC[C@H]1O[C@H](OCCO[NH2+]CC(=O)N[C@H](C(=O)N[C@H](C(=O)N[C@H](C(=O)N)CC(=O)O)Cc2ccc(cc2)O)Cc2c[nH]c3c2cccc3)[C@H]([C@H]([C@@H]1O)O)O	1	C180H60CaN49O60S+5	valid	Ca
4d08	general	Protein-Ligand	1.9	IC50=10nM	IC50	8	2014	PDE2a catalytic domain	Q2T	O00408	C24H29N6O2	433.526	433.235	61	65	78.87	3.21	3.81	1	4	7	CCCCOc1cncc(c1)c1nnc2n1c1cc(ccc1nc2C)C[NH+]1CCOCC1	1	C404H154MgN104O108S8Zn+9	train	ZnMg
4d09	general	Protein-Ligand	2.5	IC50=1.7nM	IC50	8.77	2014	PDE2a catalytic domain	788	O00408	C24H19N5O	393.441	393.159	49	53	72.18	4.36	4.57	1	4	5	O=C(c1ccc2c(c1)n1c(nnc1c(n2)C)c1ccccc1)NCc1ccccc1	1	C355H135MgN95O99S7Zn+7	train	ZnMg
4d8s	general	Protein-Ligand	2.4	IC50=0.32uM	IC50	6.49	2013	Neuraminidase (G293N mutation)	0HX	Q07599	C13H21NO6	287.309	287.137	41	41	105.09	1.56	0.77	2	4	7	CCC(O[C@@H]1OC(=C[C@@H]([C@H]1NC(=O)C)O)C(=O)O)CC	1	C270H113CaN84O86+9	train	Ca
4ddl	general	Protein-Ligand	2.07	IC50=4.9nM	IC50	8.31	2012	cAMP and cAMP-inhibited cGMP 3',5'-cyclic phosphodiesterase 10A	0JQ	Q9Y233	C24H30N4O3	422.52	422.232	61	64	80.6	3.18	4.07	1	4	6	COc1cc2c(cc1OC)nncc2c1cnc(c(c1)C)N1CCC(CC1)C(O)(C)C	1	C312H111N77O88S6Zn2+4	valid	Zn
4del	refined	Protein-Ligand	1.58	Kd=21.1nM	Kd	7.68	2013	Fructose-bisphosphate aldolase	PGH	P9WQA3	C2H7NO6P	172.054	172.001	17	16	132.84	-2.86	-1.45	2	5	4	ONC(=O)COP(O)(O)O	1	C241H97N71NaO87S4Zn+6	train	ZnNa
4dem	general	Protein-Ligand	1.85	IC50=28nM	IC50	7.55	2012	Farnesyl pyrophosphate synthase	YS4	P14324	C15H22N2O7P2	404.292	404.09	48	49	182.71	-0.15	1.78	1	7	5	CC(Oc1ccc(cc1)c1ccnc(c1)NC(P(O)(O)O)P(O)(O)O)C	1	C420H153Mg3N105O133S2+7	train	Mg
4dff	refined	Protein-Ligand	2.11	Ki=35nM	Ki	7.46	2012	cAMP and cAMP-inhibited cGMP 3',5'-cyclic phosphodiesterase 10A	0JP	Q9Y233	C16H15N3O2S	313.374	313.088	37	40	77.41	2.31	3.25	0	2	3	COc1cc2c(cc1OC)CCn1c2c(nc1)c1cncs1	1	C299H112MgN74O85S6Zn+6	test	ZnMg
4dgr	general	Protein-Ligand	1.55	IC50=9.1uM	IC50	5.04	2012	Neuraminidase	3LV	P03472	C20H31N2O5	379.471	379.223	58	59	102.51	-0.18	0.5	3	5	11	CCC[NH+](Cc1cc(ccc1N1C(=O)CCC1(CO)CO)C(=O)O)CCC	1	C298H123CaN97O99S2+9	test	Ca
4dhf	general	Protein-Ligand	2.8	IC50=28nM	IC50	7.55	2012	Aurora kinase A	0K6	O14965	C23H31N8O2	451.545	451.257	64	68	115.51	1.22	2.98	2	4	6	C[NH+]1CCN(CC1)C(=O)c1cc(cn1C)Nc1ncc2c(n1)n(C1CCCC1)c(c2)C(=O)N	1	C282H81MgN72O72+8	valid	Mg
4dhl	refined	Protein-Ligand	2.3	Ki=33uM	Ki	4.48	2012	Purple acid phosphatase	0K7	P80366	C11H9NO2S	219.26	219.035	24	25	78.43	3.63	2.82	0	3	1	Cc1ccc(cc1)c1scc(n1)C(=O)O	1	C168H75FeN57O53Zn+7	train	ZnFe
4dr9	general	Protein-Ligand	1.9	IC50=10nM	IC50	8	2013	Peptide deformylase	BB2	A0A0H3JZJ4	C19H35N3O5	385.498	385.258	62	62	118.97	1.55	1.92	4	5	16	CCCCC[C@@H](C(=O)N[C@H](C(=O)N1CCC[C@H]1CO)C(C)C)CC(=O)NO	1	C253H81N65O69S6Zn+4	valid	Zn
4dsy	refined	Protein-Ligand	2.3	Ki=37uM	Ki	4.43	2012	Purple acid phosphatase	0LO	P80366	C12H9NO2	199.205	199.063	24	25	50.19	3.09	2.45	0	3	1	OC(=O)c1cncc(c1)c1ccccc1	1	C186H77FeN57O59Zn+6	train	ZnFe
4dt2	general	Protein-Ligand	2.7	Ki=43uM	Ki	4.37	2012	Purple acid phosphatase	0LV	P80366	C11H14O2	178.228	178.099	27	28	29.46	1.66	1.89	1	1	2	OCc1cccc2c1OC(C2)(C)C	1	C181H74FeN56O56Zn+6	train	ZnFe
4dv8	refined	Protein-Ligand	1.63	Ki=0.58nM	Ki	9.24	2012	Lethal factor	0LX	P15917	C22H29F2N2O3	407.474	407.215	58	59	75.17	3.09	3.49	3	2	14	CO[C@@H](c1ccc(cc1)F)C[C@@H](C(=O)NO)CCCC[NH2+]Cc1ccc(cc1)F	1	C343H117N92O107Zn+11	test	Zn
4dwb	general	Protein-Ligand	2.1	IC50=1840nM	IC50	5.74	2013	Farnesyl pyrophosphate synthase	0M7	Q95WL3	C7H22NO6P2	278.2	278.092	38	37	165.17	-4.5	-1.45	1	6	6	CCCCC[NH2+]CC(P(O)(O)O)P(O)(O)O	1	C340H137Mg3N89O104S6+9	valid	Mg
4dwg	general	Protein-Ligand	2.01	IC50=58.0nM	IC50	7.24	2013	Farnesyl pyrophosphate synthase	0M8	Q95WL3	C9H26NO6P2	306.253	306.124	44	43	165.17	-3.42	-0.67	1	6	8	CCCCCCC[NH2+]CC(P(O)(O)O)P(O)(O)O	1	C393H152Mg3N103O122S6+10	train	Mg
4dxj	general	Protein-Ligand	2.35	IC50=38.0nM	IC50	7.42	2013	Farnesyl pyrophosphate synthase	0M9	Q95WL3	C5H18NO6P2	250.147	250.061	32	31	165.17	-5.4	-2.24	1	6	4	CCC[NH2+]CC(P(O)(O)O)P(O)(O)O	1	C320H124Mg3N86O100S5+7	train	Mg
4e1e	general	Protein-Ligand	2.65	IC50=490nM	IC50	6.31	2013	Farnesyl pyrophosphate synthase	0MW	Q95WL3	C8H24NO6P2	292.227	292.108	41	40	165.17	-3.96	-1.06	1	6	7	CCCCCC[NH2+]CC(P(O)(O)O)P(O)(O)O	1	C354H137Mg3N95O110S5+9	valid	Mg
4e1m	general	Protein-Ligand	1.9	IC50=55nM	IC50	7.26	2012	HIV-1 Integrase (F185K mutation)	TQ2	P12497	C24H27NO3	377.476	377.199	55	57	59.42	6.26	5.77	0	3	4	OC(=O)[C@H](c1c(C)nc2c(c1c1ccc(c(c1)C)C)cccc2)OC(C)(C)C	1	C196H57CaN52O54S+6	train	Ca
4e1n	general	Protein-Ligand	2	IC50=67nM	IC50	7.17	2012	HIV-1 integrase (F185K mutation)	TQX	P12497	C26H28FNO4	437.503	437.2	60	63	68.65	6.36	5.92	0	3	4	OC(=O)[C@H](c1c(C)nc2c(c1c1cc(F)c3c(c1C)CCCO3)cccc2)OC(C)(C)C	1	C199H55CaN52O54S+5	train	Ca
4e3d	general	Protein-Ligand	1.6	IC50=5mM	IC50	2.3	2012	Carbonic anhydrase 2	GTQ	P00918	C7H6O4	154.12	154.027	17	17	77.76	2.37	0.8	2	4	2	Oc1ccc(c(c1)C(=O)O)O	1	C289H91N73O64SZn+4	train	Zn
4e3f	general	Protein-Ligand	1.5	IC50=3mM	IC50	2.52	2012	Carbonic anhydrase 2	GRE	P00918	C7H6O4	154.12	154.027	17	17	77.76	2.92	0.8	2	4	2	OC(=O)c1c(O)cccc1O	1	C274H86N71O61SZn+4	train	Zn
4e3g	refined	Protein-Ligand	1.55	Ki=10.6uM	Ki	4.97	2012	Carbonic anhydrase 2	PHB	P00918	C7H6O3	138.121	138.032	16	16	57.53	2.18	1.09	1	3	1	Oc1ccc(cc1)C(=O)O	1	C262H90N66O58Zn+4	train	Zn
4e3h	general	Protein-Ligand	1.5	Ki=90nM	Ki	7.05	2012	Carbonic anhydrase 2	HQE	P00918	C6H6O2	110.111	110.037	14	14	40.46	1.21	1.1	2	2	2	Oc1ccc(cc1)O	1	C277H90N71O62SZn+4	train	Zn
4e49	general	Protein-Ligand	1.45	Ki=7.7uM	Ki	5.11	2012	Carbonic anhydrase 2	RCO	P00918	C6H6O2	110.111	110.037	14	14	40.46	1.21	1.1	2	2	2	Oc1cccc(c1)O	1	C282H90N72O65SZn+4	test	Zn
4e4a	general	Protein-Ligand	1.45	IC50=9mM	IC50	2.05	2012	Carbonic anhydrase 2	JKE	P00918	C7H6O2S	154.186	154.009	16	16	76.1	2.68	1.67	0	2	1	OC(=O)c1ccccc1S	1	C280H88N70O59SZn+4	train	Zn
4e5f	general	Protein-Ligand	2.39	IC50=15.0uM	IC50	4.82	2012	Polymerase protein PA	0N7	Q5EP34	C9H6NO3	176.149	176.035	19	20	63.57	-0.01	0.65	0	3	0	O=[N]1C(=O)Cc2c(C1=O)cccc2	1	C169H67Mn2N49O50S3+7	test	Mn
4e5g	general	Protein-Ligand	2.65	IC50=21.3uM	IC50	4.67	2012	Polymerase protein PA	XI7	Q5EP34	C10H8O4	192.168	192.042	22	22	74.6	2.66	1.4	1	4	3	O=C(c1ccccc1)/C=C(/C(=O)O)\O	1	C221H86Mn2N55O54S3+6	train	Mn
4e5h	general	Protein-Ligand	2.16	IC50=0.43uM	IC50	6.37	2012	Polymerase protein PA	0N8	Q5EP34	C23H25ClNO4	414.902	414.147	54	56	75.88	2.52	3.93	0	4	7	Clc1ccc(cc1)C[C@@]1(CC[N@H+](CC1)Cc1ccccc1)C(=O)CC(=O)C(=O)O	1	C307H105Mn2N74O78S5+9	train	Mn
4e5i	general	Protein-Ligand	2.94	Ki=5.01uM	Ki	5.3	2012	Polymerase protein PA	0N9	Q5EP34	C9H8N4O4	236.184	236.055	25	26	121.1	0.38	-0.43	2	5	2	Cn1cnc(c1)c1nc(=O)c(c([nH]1)C(=O)O)O	1	C257H89Mn2N64O70S3+7	test	Mn
4e5j	general	Protein-Ligand	2.35	Ki=18.7uM	Ki	4.73	2012	Polymerase protein PA	581	Q5EP34	C13H11N3O5	289.244	289.07	32	33	132.38	1.13	0.87	3	5	4	CC(=O)Nc1cccc(c1)c1nc(=O)c(c([nH]1)C(=O)O)O	1	C272H94Mn2N67O70S4+7	train	Mn
4e90	general	Protein-Ligand	2.5	IC50=8nM	IC50	8.1	2013	High affinity cGMP-specific 3',5'-cyclic phosphodiesterase 9A	7RG	O76083	C20H26N7O2	396.466	396.215	55	59	103.02	0.03	1.65	2	4	4	C[C@@H]1C[N@@H+](C[C@H]1c1nc(=O)c2c([nH]1)n(nc2)C1CCOCC1)Cc1ncccn1	1	C312H118MgN86O86S4Zn+6	train	ZnMg
4efs	refined	Protein-Ligand	1.63	Ki=2.5nM	Ki	8.6	2012	Macrophage metalloelastase	E37	P39900	C22H20N2O4S	408.47	408.114	49	51	137.73	4.44	4.62	2	4	8	OC(=O)CC[C@@H](C(=O)N)NC(=O)c1ccc(cc1)c1scc(c1)c1ccccc1	1	C276H90CaN71O75SZn+7	train	ZnCa
4eg6	general	Protein-Ligand	2.9	IC50=43nM	IC50	7.37	2012	Methionyl-tRNA synthetase, putative	0P5	Q38C91	C23H22ClN7O3	479.919	479.147	56	60	117.29	3.65	3.82	3	4	7	COc1ccc(c(c1)Cl)Oc1cc(NCc2nc3c([nH]2)cccc3)nc(n1)N1CCNC(=O)C1	1	C359H122CaN93O95+9	test	Ca
4eg7	general	Protein-Ligand	2.75	IC50=46nM	IC50	7.34	2012	Methionyl-tRNA synthetase, putative	0P4	Q38C91	C17H19Cl2N4	350.266	349.099	42	44	57.32	5.03	3.51	3	1	7	Clc1cc(C[NH2+]CCCNc2nc3c([nH]2)cccc3)cc(c1)Cl	1	C362H122CaN92O91+8	train	Ca
4ega	general	Protein-Ligand	2.7	IC50=65nM	IC50	7.19	2012	Methionyl-tRNA synthetase, putative	0P8	Q38C91	C20H22Br2N3O2	496.216	494.008	49	51	67.3	3.67	3.91	2	1	7	COc1c(C[NH2+]CCC/N=C\2/CC(=O)c3c(N2)cccc3)cc(cc1Br)Br	1	C339H113CaN87O88+7	valid	Ca
4ehm	general	Protein-Ligand	2.2	IC50=1.4uM	IC50	5.85	2012	Geranylgeranyl transferase type-2 subunit alpha, Geranylgeranyl transferase type-2 subunit beta	PJA	Q08602 Q08603	C18H16O7	344.315	344.09	41	43	102.29	4.26	3.35	1	4	2	COc1cc(C(=O)O)c2c(c1C)OC(=O)c1c(O2)c(C)c(cc1C)O	1	C281H102N80O75S3Zn+10	train	Zn
4en4	refined	Protein-Ligand	2.15	Ki=3uM	Ki	5.52	2012	Pyridoxal kinase	GT0	O00764	C9H13NO3	183.204	183.09	26	26	62.58	-0.34	0.73	2	3	5	COCc1c(CO)cnc(c1O)C	1	C240H87Mg2N55NaO70+	train	MgNa
4eo4	general	Protein-Ligand	2.87	Ki=450nM	Ki	6.35	2012	Threonine--tRNA ligase, mitochondrial	SSA	P07236	C13H20N7O8S	434.405	434.109	49	51	248.03	-4.4	-2.94	6	9	11	OC[C@@H](C(=O)NS(=O)(=O)OC[C@H]1O[C@H]([C@@H]([C@@H]1O)O)n1cnc2c1ncnc2N)[NH3+]	1	C291H105N93O88S4Zn+9	train	Zn
4eox	general	Protein-Ligand	1.78	IC50=0.28nM	IC50	9.55	2012	Peptide deformylase	0S5	Q8DP79	C22H29N3O5	415.483	415.211	59	61	107.02	2.57	2.94	2	5	12	O=CN(C[C@H](C(=O)N1CCC[C@H]1C(=O)NC(=O)c1ccccc1)CC1CCCC1)O	1	C314H105N85NiO86S4+6	valid	XX
4exs	refined	Protein-Ligand	2.4	Ki=39.0uM	Ki	4.41	2012	Beta-lactamase NDM-1	X8Z	C7C422	C9H15NO3S	217.285	217.077	29	29	96.41	1.52	0.57	0	3	4	SC[C@H](C(=O)N1CCC[C@H]1C(=O)O)C	1	C166H63N48O48S3Zn2+5	test	Zn
4f6v	general	Protein-Ligand	2.3	IC50=1.6uM	IC50	5.8	2012	Dehydrosqualene synthase	ZYM	A9JQL9	C19H19NO5	341.358	341.126	44	45	92.7	3.84	2.96	1	4	9	O=C(CC(=O)C(=O)O)NCCCc1cccc(c1)Oc1ccccc1	1	C354H135Mg2N89O101S3+7	train	Mg
4f6x	general	Protein-Ligand	1.98	IC50=8.2uM	IC50	5.09	2012	Dehydrosqualene synthase	ZYL	A9JQL9	C19H23NO5	345.39	345.158	48	49	88.76	4.72	3.26	1	4	9	CCCCCCOc1cccc(c1)Cn1ccc(c(c1=O)C(=O)O)O	1	C381H145Mg3N95O111S4+6	valid	Mg
4f9u	refined	Protein-Ligand	1.8	Ki=944nM	Ki	6.03	2012	CG32412	PBD	Q9VRQ9	C15H20N4O2S	320.41	320.131	42	43	99.47	1.82	2.76	1	1	9	COc1cc(ccc1OC)N/C(=N/CCCn1cncc1)/S	1	C264H103N70O84Zn+5	test	Zn
4f9v	general	Protein-Ligand	2.1	Ki=944nM	Ki	6.03	2012	CG32412(Mutation: C113A, C136A)	PBD	Q9VRQ9	C15H20N4O2S	320.41	320.131	42	43	92.43	1.55	2.74	2	1	9	COc1cc(ccc1OC)NC(=S)NCCCn1cncc1	1	C266H95N63O77Zn+5	test	Zn
4fai	refined	Protein-Ligand	1.65	Ki=101.3nM	Ki	6.99	2012	CG5976, isoform B	PBD	Q86PD7	C15H20N4O2S	320.41	320.131	42	43	92.43	1.55	2.74	2	1	9	COc1cc(ccc1OC)NC(=S)NCCCn1cncc1	1	C248H93N62O72SZn+6	test	Zn
4fbe	general	Protein-Ligand	1.88	Ki=101.3nM	Ki	6.99	2012	CG5976, isoform B (Mutation: C136A, C164A)	PBD	Q86PD7	C15H20N4O2S	320.41	320.131	42	43	99.47	1.82	2.76	1	1	9	COc1cc(ccc1OC)N/C(=N/CCCn1cncc1)/S	1	C253H94N60O72SZn+5	train	Zn
4fcb	general	Protein-Ligand	2.1	IC50=2.9nM	IC50	8.54	2012	cAMP and cAMP-inhibited cGMP 3',5'-cyclic phosphodiesterase 10A	0T7	Q9Y233	C25H24N4O	396.484	396.195	54	58	52.31	5.96	5.58	0	3	5	CCCc1nc(c2n1c1ccc(cc1nc2C)OCc1ccc2c(n1)cccc2)C	1	C360H125MgN92O106S5Zn+7	train	ZnMg
4fcd	general	Protein-Ligand	2.02	IC50=0.28nM	IC50	9.55	2012	cAMP and cAMP-inhibited cGMP 3',5'-cyclic phosphodiesterase 10A	0T6	Q9Y233	C18H15ClN4O2	354.79	354.088	40	43	61.54	4.16	3.92	0	3	3	COc1cc(OC)c2c(c1)n1c(nc(c1nn2)C)c1ccccc1Cl	1	C327H122MgN82O95S6Zn+4	valid	ZnMg
4fci	general	Protein-Ligand	1.82	Ki~55mM	Ki	1.26	2012	Arginase-1	GPA	P05089	C4H12N4O2	148.164	148.096	22	21	130.95	-1.92	-3.56	1	2	2	OC(=O)[C@H](C[NH+]=C(N)N)[NH3+]	1	C242H83Mn2N70O83S+2	train	Mn
4fck	general	Protein-Ligand	1.9	Ki~55mM	Ki	1.26	2012	Arginase-1	GPA	P05089	C4H12N4O2	148.164	148.096	22	21	130.95	-1.92	-3.56	1	2	2	OC(=O)[C@H](C[NH+]=C(N)N)[NH3+]	1	C237H84Co2N65O81S+	train	XX
4fkk	general	Protein-Ligand	2.6	Ki=0.5nM	Ki	9.3	2012	porcine aminopeptidase-N	BES	P15145	C16H25N2O4	309.381	309.181	47	47	114.27	-0.08	0.21	3	4	9	O[C@@H]([C@@H](Cc1ccccc1)[NH3+])C(=O)N[C@H](C(=O)O)CC(C)C	1	C313H110N83O99S3Zn+5	train	Zn
4fl2	refined	Protein-Ligand	2.19	Kd=220uM	Kd	3.66	2012	Tyrosine-protein kinase SYK	ANP	P43405	C10H20N6O12P3	509.22	509.035	51	53	332.18	-6.35	-2.4	4	12	9	O[C@@H]1[C@@H](COP(OP(NP(O)(O)O)(O)O)(O)O)O[C@H]([C@@H]1O)n1cnc2c1ncnc2N	1	C321H104MgN85O84S3+9	valid	Mg
4fl3	general	Protein-Ligand	1.9	Kd=150uM	Kd	3.82	2012	Tyrosine-protein kinase SYK	ANP	P43405	C10H20N6O12P3	509.22	509.035	51	53	332.18	-6.35	-2.4	4	12	9	O[C@@H]1[C@@H](COP(OP(NP(O)(O)O)(O)O)(O)O)O[C@H]([C@@H]1O)n1cnc2c1ncnc2N	1	C318H96MgN85O84S3+9	valid	Mg
4fli	general	Protein-Ligand	1.55	IC50=3.59uM	IC50	5.44	2012	Methionine aminopeptidase 1	Y16	P53582	C14H28N2O6	320.382	320.195	50	49	142.11	-1.01	-0.4	5	5	14	CO[C@H]([C@@H]([C@H]([C@@H](CCC(C)(C)C)O)O)O)C(=O)NCC(=O)N	1	C351H107Mn2N92O100S5+7	train	Mn
4flj	general	Protein-Ligand	1.74	IC50=7.45uM	IC50	5.13	2012	Methionine aminopeptidase 1	Y08	P53582	C22H38N2O6	426.547	426.273	68	69	119.33	0.46	0.78	4	5	15	CO[C@H]([C@@H]([C@H]([C@@H](/C=C/C(C)(C)C)O)O)O)C(=O)NC[C@@H]1CCCN(C1)C(=O)C1CC1	1	C359H117Mn2N92O103S6+8	train	Mn
4flk	general	Protein-Ligand	1.47	IC50=5.58uM	IC50	5.25	2012	Methionine aminopeptidase 1	Y10	P53582	C21H33NO5	379.49	379.236	60	61	99.02	2.65	1.58	4	4	13	CO[C@H]([C@@H]([C@H]([C@@H](CCC(C)(C)C)O)O)O)C(=O)NC1Cc2c(C1)cccc2	1	C359H116Mn2N93O102S5+8	train	Mn
4fll	general	Protein-Ligand	1.5	IC50=5.14uM	IC50	5.29	2012	Methionine aminopeptidase 1	YZ6	P53582	C25H35NO6	445.549	445.246	67	68	112.16	2.62	3.01	4	4	16	CO[C@H]([C@@H]([C@H]([C@@H](/C=C/C(C)(C)C)O)O)O)C(=O)NCC[C@@H](c1ccco1)c1ccccc1	1	C401H127Mn2N102O111S5+9	train	Mn
4fmu	general	Protein-Ligand	2.1	Kd=360nM	Kd	6.44	2012	Histone-lysine N-methyltransferase SETD2	0UM	Q9BYW2	C18H31N7O5	425.483	425.239	61	63	200.86	-2.88	-2.18	5	7	11	CCC[NH2+][C@H](C[C@H]1O[C@H]([C@@H]([C@@H]1O)O)n1cnc2c1ncnc2N)CC[C@@H](C(=O)O)[NH3+]	1	C304H88N70O78S6Zn+4	valid	Zn
4fp1	refined	Protein-Ligand	1.68	Ki=0.027mM	Ki	4.57	2013	Mandelate racemase	BFM	P11444	C4H2F6O3	212.047	211.991	15	14	57.53	2.1	0.93	1	3	1	OC(=O)C(C(F)(F)F)(C(F)(F)F)O	1	C238H97MgN58O70S3+4	test	Mg
4fvq	general	Protein-Ligand	1.75	Kd=1uM	Kd	6	2012	Tyrosine-protein kinase JAK2	ATP	O60674	C10H19N5O13P3	510.205	510.019	50	52	329.38	-6.07	-2.36	3	12	9	O[C@@H]1[C@@H](COP(OP(OP(O)(O)O)(O)O)(O)O)O[C@H]([C@@H]1O)n1cnc2c1ncnc2N	1	C329H102MgN80O89S+6	valid	Mg
4fvr	general	Protein-Ligand	2	Kd=1uM	Kd	6	2012	Tyrosine-protein kinase JAK2(V617F)	ATP	O60674	C10H19N5O13P3	510.205	510.019	50	52	329.38	-6.07	-2.36	3	12	9	O[C@@H]1[C@@H](COP(OP(OP(O)(O)O)(O)O)(O)O)O[C@H]([C@@H]1O)n1cnc2c1ncnc2N	1	C304H95MgN73O79S+6	test	Mg
4g0c	general	Protein-Ligand	2	Ki=12nM	Ki	7.92	2012	Carbonic anhydrase 2	AZM	P00918	C4H6N4O3S2	222.245	221.988	19	19	151.66	-1.23	1	2	5	3	CC(=O)Nc1nnc(s1)S(=O)(=O)N	1	C331H98N82O75S2Zn+4	valid	Zn
4g2j	general	Protein-Ligand	2.4	IC50=11nM	IC50	7.96	2013	High affinity cGMP-specific 3',5'-cyclic phosphodiesterase 9A	0WF	O76083	C21H26N5O2	380.463	380.209	54	58	77.24	2.48	3.21	2	2	5	O=c1[nH]c(nc2c1cnn2C1CCCC1)[C@H]([N@@H+]1C[C@@H](C1)Oc1ccccc1)C	1	C358H133MgN94O98S7Zn+7	train	ZnMg
4g2l	general	Protein-Ligand	3	IC50=32nM	IC50	7.49	2013	High affinity cGMP-specific 3',5'-cyclic phosphodiesterase 9A	0WL	O76083	C19H24N7O	366.44	366.204	51	55	93.79	0.82	2.34	2	4	4	O=c1[nH]c(nc2c1cnn2C1CCCC1)[C@H]([N@@H+]1C[C@@H](C1)c1ncccn1)C	1	C354H136MgN95O101S6Zn+7	train	ZnMg
4g2w	general	Protein-Ligand	2.28	IC50=1.6nM	IC50	8.8	2013	cGMP-specific 3',5'-cyclic phosphodiesterase	NI0	O76074	C22H33N4O4S	449.587	449.222	64	66	105.44	3.3	3.87	2	5	9	CCCOc1ccc(cc1c1nc(O)c(c(n1)CC)CC)S(=O)(=O)N1CC[NH+](CC1)C	1	C291H106MgN78O80S3Zn+6	train	ZnMg
4ga3	general	Protein-Ligand	2.39	IC50~30nM	IC50	7.52	2013	Farnesyl pyrophosphate synthase	4GA	P14324	C9H21N2O7P2	331.22	331.082	41	41	178.65	-3.32	-0.5	1	7	6	CCCCn1ccn(c1)CC(P(O)(O)O)(P(O)(O)O)O	1	C366H147Mg3N95O120S+8	test	Mg
4gbd	refined	Protein-Ligand	1.98	Ki=0.0048nM	Ki	11.32	2013	Putative uncharacterized protein	MCF	Q9HZ64	C12H18N4O4S	314.361	314.105	39	41	137.43	-2.26	-1.07	4	4	6	CSC[C@H]1O[C@H]([C@@H]([C@@H]1O)O)n1cnc2c1N=CNC[C@H]2O	1	C366H127N90O97S5Zn+7	train	Zn
4gh6	general	Protein-Ligand	2.7	IC50=0.021uM	IC50	7.68	2012	High affinity cGMP-specific 3',5'-cyclic phosphodiesterase 9A	LUO	O76083	C22H22N6O3	418.448	418.175	53	56	113.93	2.46	3.01	3	3	7	COc1ccc(cc1)NC(=O)[C@@H](Nc1[nH]c(=O)c2c(n1)n(nc2)c1ccccc1C)C	1	C321H122MgN86O91S3Zn+5	train	ZnMg
4gnf	general	Protein-Ligand	1.55	Kd=450uM	Kd	3.35	2013	Histone-lysine N-methyltransferase NSD3	15-mer	Q9BZ95 P84243	C43H87N18O13	1064.26	1063.67	161	160	568.59	-5.2	-7.65	14	13	47	[NH3+]CCCC[C@@H](C(=O)N[C@H](C(=O)N[C@H](C(=O)N[C@H](C(=O)N[C@H](C(=O)N[C@H](C(=O)O)CCCC[NH3+])CCC[NH+]=C(N)N)C)[C@H](O)C)CCC(=O)N)NC(=O)[C@H]([C@H](O)C)NC(=O)[C@@H](NC(=O)[C@@H]([NH3+])C)CCC[NH+]=C(N)N	1	C169H47N44O49S6Zn+2	test	Zn
4gng	general	Protein-Ligand	1.73	Kd=290uM	Kd	3.54	2013	Histone-lysine N-methyltransferase NSD3	15-mer	Q9BZ95 P84243	C49H98N19O15	1193.42	1192.75	181	180	590.28	-5.51	-7.32	15	15	53	[NH3+]CCCC[C@@H](C(=O)N[C@H](C(=O)N[C@H](C(=O)N[C@H](C(=O)N[C@H](C(=O)N[C@H](C(=O)N[C@H](C(=O)O)CO)CCCC[N+](C)(C)C)CCC[NH+]=C(N)N)C)[C@H](O)C)CCC(=O)N)NC(=O)[C@H]([C@H](O)C)NC(=O)[C@@H](NC(=O)[C@@H]([NH3+])C)CCC[NH+]=C(N)N	1	C129H37N33O40S5Zn+2	train	Zn
4gql	refined	Protein-Ligand	1.15	Ki=0.26nM	Ki	9.59	2013	Macrophage metalloelastase (F171D mutation)	R47	P39900	C35H36BrClN4O10P	819.012	817.104	88	91	255.97	5.65	5.41	3	10	18	OC(=O)CC[C@@H](C(=O)N[C@H](C(=O)N)CCC(=O)O)NC(=O)[C@@H](CP(c1ccc(cc1)Br)(O)O)Cc1onc(c1)c1ccc(cc1)c1cccc(c1)Cl	1	C300H95CaN77O82SZn+9	train	ZnCa
4gr0	refined	Protein-Ligand	1.5	Ki=0.28nM	Ki	9.55	2013	Macrophage metalloelastase (F171D mutation)	R4B	P39900	C31H32BrClN4O6P	702.94	701.093	76	79	181.37	3.79	5.72	3	6	14	O=C([C@@H](CP(c1ccc(cc1)Br)(O)O)Cc1onc(c1)c1ccc(cc1)c1cccc(c1)Cl)N[C@H](C(=O)N[C@H](C(=O)N)C)C	1	C320H99CaN83O92SZn2+9	train	ZnCa
4gr3	refined	Protein-Ligand	1.49	Ki=15.5nM	Ki	7.81	2013	Macrophage metalloelastase (F171D mutation)	R45	P39900	C29H33BrN4O10P	708.471	707.112	78	80	255.97	3.4	3.09	3	10	17	OC(=O)CC[C@@H](C(=O)N[C@H](C(=O)N)CCC(=O)O)NC(=O)[C@@H](CP(c1ccc(cc1)Br)(O)O)Cc1onc(c1)c1ccccc1	1	C302H92CaN78O83SZn+9	train	ZnCa
4gr8	refined	Protein-Ligand	1.3	Ki=14.7nM	Ki	7.83	2013	Macrophage metalloelastase (F171D mutation)	R4C	P39900	C25H29BrN4O6P	592.399	591.101	66	68	181.37	1.53	3.4	3	6	13	O=C([C@@H](CP(c1ccc(cc1)Br)(O)O)Cc1onc(c1)c1ccccc1)N[C@H](C(=O)N[C@H](C(=O)N)C)C	1	C317H96CaN81O88SZn2+9	train	ZnCa
4gtm	general	Protein-Ligand	2.2	IC50=9.2nM	IC50	8.04	2012	Protein farnesyltransferase/geranylgeranyltransferase type-1 subunit alpha; Protein farnesyltransferase subunit beta	7TM	Q02293 Q04631	C36H42N6O5S	670.821	670.294	90	94	138.17	5.71	7.27	1	5	15	CCCCCCNC(=O)Oc1ccc(cc1)C[C@@H]1CN(Cc2cncn2C)c2c(CN1S(=O)(=O)c1ccc(cc1)OC)cc(cc2)C#N	1	C487H151N122O131S7Zn+6	train	Zn
4gto	general	Protein-Ligand	2.15	IC50=10.5nM	IC50	7.98	2012	Protein farnesyltransferase/geranylgeranyltransferase type-1 subunit alpha; Protein farnesyltransferase subunit beta	7TO	Q02293 Q04631	C30H28F3N5O6S2	675.698	675.143	74	78	151.59	4.55	6.52	0	6	9	COc1ccc(cc1)S(=O)(=O)N1Cc2cc(C#N)ccc2N(C[C@H]1Cc1ccc(cc1)OS(=O)(=O)C(F)(F)F)Cc1cncn1C	1	C416H122N111O104S6Zn+8	train	Zn
4gtp	general	Protein-Ligand	2.75	IC50=11.4nM	IC50	7.94	2012	Protein farnesyltransferase/geranylgeranyltransferase type-1 subunit alpha; Protein farnesyltransferase subunit beta	7TP	Q02293 Q04631	C33H34N4O6S	614.711	614.22	78	83	129.65	3.6	5.79	2	5	11	COc1ccc(cc1)S(=O)(=O)N1Cc2cc(ccc2N(C[C@H]1Cc1ccc(cc1)O)Cc1cncn1C)c1ccc(o1)CO	1	C452H144N122O120S5Zn+9	valid	Zn
4gts	general	Protein-Ligand	2.45	IC50=12.8nM	IC50	7.89	2012	Geranylgeranyl transferase type-2 subunit alpha; Geranylgeranyl transferase type-2 subunit beta	7TP	Q08602 Q08603	C33H32N4O6S	612.695	612.204	76	81	126.49	4.24	6.11	1	5	10	COc1ccc(cc1)S(=O)(=O)N1Cc2cc(ccc2N(C[C@H]1Cc1ccc(cc1)O)Cc1cncn1C)c1ccc(o1)C=O	1	C444H149N118O113S6Zn+7	test	Zn
4gtt	general	Protein-Ligand	2.05	IC50=6nM	IC50	8.22	2012	Geranylgeranyl transferase type-2 subunit alpha; Geranylgeranyl transferase type-2 subunit beta	7TQ	Q08602 Q08603	C37H36N6O5S	676.784	676.247	85	90	138.17	4.87	6.89	1	5	12	COc1ccc(cc1)S(=O)(=O)N1Cc2cc(C#N)ccc2N(C[C@H]1Cc1ccc(cc1)OC(=O)NCc1ccccc1)Cc1cncn1C	1	C555H174N143O142S9Zn+9	train	Zn
4gtv	general	Protein-Ligand	1.95	IC50=38nM	IC50	7.42	2012	Geranylgeranyl transferase type-2 subunit alpha; Geranylgeranyl transferase type-2 subunit beta	7TR	Q08602 Q08603	C34H38N6O5S	642.768	642.262	84	88	129.38	4.29	6.05	0	5	12	COc1ccc(cc1)S(=O)(=O)N1Cc2cc(C#N)ccc2N(C[C@H]1Cc1ccc(cc1)OC(=O)N(CC)CC)Cc1cncn1C	1	C471H145N115O124S8Zn+6	test	Zn
4gy5	general	Protein-Ligand	2.96	Kd=0.15uM	Kd	6.82	2012	E3 ubiquitin-protein ligase UHRF1	17-mer	Q96T88 P84243	C49H98N19O15	1193.42	1192.75	181	180	590.28	-5.51	-7.32	15	15	53	[NH3+]CCCC[C@@H](C(=O)N[C@H](C(=O)N[C@H](C(=O)N[C@H](C(=O)N[C@H](C(=O)N[C@H](C(=O)N[C@H](C(=O)O)CO)CCCC[N+](C)(C)C)CCC[NH+]=C(N)N)C)[C@H](O)C)CCC(=O)N)NC(=O)[C@H]([C@H](O)C)NC(=O)[C@@H](NC(=O)[C@@H]([NH3+])C)CCC[NH+]=C(N)N	1	C344H112N97O111S11Zn+9	test	Zn
4h5c	general	Protein-Ligand	2.02	IC50=28nM	IC50	7.55	2012	human farnesyl pyrophosphate synthase (FPPS)	YS4	P14324	C15H22N2O7P2	404.292	404.09	48	49	182.71	-0.15	1.78	1	7	5	CC(Oc1ccc(cc1)c1ccnc(c1)NC(P(O)(O)O)P(O)(O)O)C	1	C432H151Mg3N107O136S2+8	valid	Mg
4h5d	general	Protein-Ligand	2.02	IC50=28nM	IC50	7.55	2012	Farnesyl pyrophosphate synthase	YS4	P14324	C15H22N2O7P2	404.292	404.09	48	49	182.71	-0.15	1.78	1	7	5	CC(Oc1ccc(cc1)c1ccnc(c1)NC(P(O)(O)O)P(O)(O)O)C	1	C440H155Mg3N110O137S2+8	valid	Mg
4h5e	general	Protein-Ligand	2.04	Kd=0.86uM	Kd	6.07	2012	Farnesyl pyrophosphate synthase	IPR	P14324	C5H16O7P2	250.124	250.037	30	29	146.79	-1.2	0.38	0	5	5	CC(CCOP(OP(O)(O)O)(O)O)C	1	C324H126Mg3N86O102S2+8	test	Mg
4heu	general	Protein-Ligand	2	IC50=0.097nM	IC50	10.01	2012	cAMP and cAMP-inhibited cGMP 3',5'-cyclic phosphodiesterase 10A	15J	Q9Y233	C24H25N5O2	415.488	415.201	56	60	86.3	4.34	4.84	3	3	7	OCC1CCN(CC1)c1ncccc1Oc1ccc(cc1)Nc1nc2c([nH]1)cccc2	1	C377H132N94O106S6Zn2+8	train	Zn
4hev	general	Protein-Ligand	2.5	Ki=0.46uM	Ki	6.34	2013	Botulinum neurotoxin type A light chain	AXM	P0DPI0	C12H19NO2	209.285	209.142	34	36	49.33	2.44	2.49	2	2	4	ONC(=O)C[C@]12C[C@H]3C[C@@H](C2)C[C@@H](C1)C3	1	C281H99N69O78SZn+8	valid	Zn
4hf4	refined	Protein-Ligand	2	Ki=2.4nM	Ki	8.62	2012	cAMP and cAMP-inhibited cGMP 3',5'-cyclic phosphodiesterase 10A	15H	Q9Y233	C24H25N5O2S	447.553	447.173	57	61	111.64	4.93	5.36	2	4	7	C[C@@H](C1CCN(CC1)c1nccnc1Oc1ccc(cc1)Nc1nc2c(s1)cccc2)O	1	C369H127N89O106S6Zn2+6	test	Zn
4hn2	general	Protein-Ligand	1.9	IC50=129nM	IC50	6.89	2012	Inositol hexakisphosphate and diphosphoinositol-pentakisphosphate kinase 2	0EJ	O43314	C8H26O25P6	708.12	707.919	65	65	518.13	-11.38	-6.15	0	19	8	O=C(CP(O)(O)O)O[C@@H]1[C@@H](OP(O)(O)O)[C@H](OP(O)(O)O)[C@@H]([C@@H]([C@H]1OP(O)(O)O)OP(O)(O)O)OP(O)(O)O	1	C299H120Mg3N88O88S4+13	train	Mg
4hnc	general	Protein-Ligand	1.89	Ki=0.67mM	Ki	3.17	2013	Mandelate racemase (C92S, K166C, C264S mutation)	0UT	P11444	C14H12O3	228.243	228.079	29	30	57.53	3.2	2.01	1	3	3	OC(=O)C(c1ccccc1)(c1ccccc1)O	1	C292H115MgN76O89S5+6	train	Mg
[truncated: 1,431 more rows]
