# Supplementary material for: MetalProGNet: a structure-based deep graph model for metalloprotein–ligand interaction predictions
Source: Royal Society of Chemistry journal article supplement (doi:10.1039/d2sc06576b), 2023-01-01
Supplement: d2sc06576b3.xlsx [file d2sc06576b3.xlsx]

## Sheet: Sheet1
PDB code	Subset	Complex Type	Resolution	Affinity Data	Affinity Type	pKd pKi pIC50	Release Year	Protein Name	Ligand Name	UniProt AC	Formula	Molecular Weight	Exact Mass	No. of atoms	No. of bonds	Polar Surface Area	XLOGP3	open banel LogP	HB donor	HB acceptor	Rotatable bonds	Canonical SMILES	metal_flag	pocket_formula	group
10gs	refined	Protein-Ligand	2.2	Ki=0.4uM	Ki	6.4	1998	glutathione s-transferase	VWW	P09211	C23H28N3O6S	474.55	474.17	61	62	185.74	0.82	1.6	3	6	13	O=C(N[C@H](C(=O)N[C@H](c1ccccc1)C(=O)O)CSCc1ccccc1)CC[C@@H](C(=O)O)[NH3+]	0	C290H90N85O82S5+9	train
11gs	general	Protein-Ligand	2.3	Ki=1.5uM	Ki	5.82	1999	glutathione s-transferase	2-mer	P09211	C23H30Cl2N3O10S	611.469	610.103	69	69	249.34	1.58	1.34	3	9	17	CC[C@H](C(=O)c1ccc(c(c1Cl)Cl)OCC(=O)O)CSC[C@@H](C(=O)NCC(=O)O)NC(=O)CC[C@@H](C(=O)O)[NH3+]	0	C347H107N91O98S5+9	train
13gs	general	Protein-Ligand	1.9	Ki=24uM	Ki	4.62	1999	glutathione s-transferase	SAS	P09211	C18H14N4O5S	398.393	398.068	42	44	149.69	4.29	4.86	2	6	6	OC(=O)c1cc(/N=N/c2ccc(cc2)S(=O)(=O)Nc2ccccn2)ccc1O	0	C204H64N56O56S2+4	train
16pk	general	Protein-Ligand	1.6	Ki=6uM	Ki	5.22	1998	phosphoglycerate kinase	BIS	P07378	C15H25F4N5O12P3	636.3	636.065	64	66	320.15	-3.7	0.15	3	12	13	O[C@@H]1[C@@H](COP(OP(C(CCCC(P(O)(O)O)(F)F)(F)F)(O)O)(O)O)O[C@H]([C@@H]1O)n1cnc2c1ncnc2N	0	C298H92N79O88S6+5	train
184l	refined	Protein-Ligand	1.8	Kd=19uM	Kd	4.72	1995	Enterobacteria phage T4 LYSOZYME	I4B	P00720	C10H14	134.218	134.11	24	24	0	3.51	2.89	0	0	2	CC(Cc1ccccc1)C	0	C265H79N71O68S3+5	train
185l	refined	Protein-Ligand	1.8	Kd=290uM	Kd	3.54	1995	Enterobacteria phage T4 LYSOZYME	IND	P00720	C8H7N	117.148	117.058	16	17	15.79	2.05	2.17	1	0	0	c1ccc2c(c1)[nH]cc2	0	C258H76N70O62S3+6	valid
186l	refined	Protein-Ligand	1.8	Kd=14uM	Kd	4.85	1995	Enterobacteria phage T4 LYSOZYME	N4B	P00720	C10H14	134.218	134.11	24	24	0	3.8	3.03	0	0	3	CCCCc1ccccc1	0	C268H80N72O69S3+5	test
187l	refined	Protein-Ligand	1.8	Kd=422uM	Kd	3.37	1995	Enterobacteria phage T4 LYSOZYME	PXY	P00720	C8H10	106.165	106.078	18	18	0	2.65	2.3	0	0	0	Cc1ccc(cc1)C	0	C249H77N65O61S2+5	valid
188l	refined	Protein-Ligand	1.8	Kd=470uM	Kd	3.33	1995	Enterobacteria phage T4 LYSOZYME	OXE	P00720	C8H10	106.165	106.078	18	18	0	2.65	2.3	0	0	0	Cc1ccccc1C	0	C250H71N68O60S3+6	valid
1a07	general	Protein-Ligand	2.2	Kd=0.4uM	Kd	6.4	1998	c-src tyrosine kinase	4-mer	P12931	C26H41N3O5	475.621	475.305	75	75	115.81	5.32	4.07	2	5	19	CCCCCN(C(=O)[C@@H](NC(=O)[C@H](Cc1ccccc1)NC(=O)C)CCC(=O)O)CCCCC	0	C213H71N62O59S2+9	train
1a08	general	Protein-Ligand	2.2	Kd=2.4uM	Kd	5.62	1998	tyrosine kinase C-src	4-mer	P12931	C27H43F2N3O8P	606.616	606.276	84	84	190.09	3.87	3.86	2	8	20	CCCCCN(C(=O)[C@@H](NC(=O)[C@H](Cc1ccc(cc1)C(P(O)(O)O)(F)F)NC(=O)C)CCC(=O)O)CCCCC	0	C206H76N62O65S2+9	train
1a09	general	Protein-Ligand	2	Kd=0.2uM	Kd	6.7	1998	c-src tyrosine kinase	4-mer	P12931	C27H45N3O10P	602.634	602.284	86	86	219.55	2.61	2.6	3	9	22	CCCCCN(C(=O)[C@@H](NC(=O)[C@H](Cc1ccc(c(c1)CO)OP(O)(O)O)NC(=O)C)CCC(=O)O)CCCCC	0	C316H104N90O86S2+14	test
1a0q	general	Protein-Ligand	2.3	Ki=27nM	Ki	7.57	1999	fab 29g11	HEP	P01869 P01837	C15H23NO6P	344.32	344.126	46	46	129.68	2.81	2.7	1	5	10	CCCC[C@@H](P(Oc1ccccc1)(O)O)NC(=O)CCC(=O)O	0	C332H78N76O71S2+7	train
1a0t	general	Protein-Ligand	2.4	Kd=50mM	Kd	1.3	1998	sucrose-specific porin	SUC	P22340	C12H22O11	342.296	342.116	45	46	189.53	-3.88	-5.4	8	8	13	OC[C@H]1O[C@@]([C@H]([C@@H]1O)O)(CO)O[C@H]1O[C@H](CO)[C@H]([C@@H]([C@H]1O)O)O	0	C289H99N80O80S2+10	train
1a1b	general	Protein-Ligand	2.2	Kd=0.4uM	Kd	6.4	1998	tyrosine kinase C-src	3-mer	P12931	C26H43N3O9P	572.608	572.274	82	82	199.32	3.5	3.11	2	8	20	CCCCCN(C(=O)[C@@H](NC(=O)[C@H](Cc1ccc(cc1)OP(O)(O)O)NC(=O)C)CCC(=O)O)CCCCC	0	C214H74N68O66S2+10	train
1a1c	general	Protein-Ligand	2.4	Kd=0.4uM	Kd	6.4	1998	tyrosine kinase C-src	3-mer	P12931	C25H39N3O9P	556.566	556.242	77	78	199.32	2.83	2.33	2	8	16	CC(=O)N[C@H](C(=O)N[C@H](C(=O)N(CCCC1CCCC1)C)CCC(=O)O)Cc1ccc(cc1)OP(O)(O)O	0	C228H72N67O66S2+11	train
1a1e	refined	Protein-Ligand	2.2	Kd=1uM	Kd	6	1998	tyrosine kinase C-src	4-mer	P12931	C25H39N3O9P	556.566	556.242	77	78	199.32	2.64	2.27	2	8	15	CCCC[C@@H]1CCCN(C1)C(=O)[C@@H](NC(=O)[C@H](Cc1ccc(cc1)OP(O)(O)O)NC(=O)C)CCC(=O)O	0	C258H79N74O67S2+11	valid
1a28	refined	Protein-Ligand	1.8	Ki=5.1nM	Ki	8.29	1998	ligand-binding domain of the human progesterone receptor	STR	P06401	C21H30O2	314.462	314.225	53	56	34.14	4	4.72	0	2	1	O=C1CC[C@]2(C(=C1)CC[C@@H]1[C@@H]2CC[C@]2([C@H]1CC[C@@H]2C(=O)C)C)C	0	C357H118N82O93S6+2	valid
1a2c	general	Protein-Ligand	2.1	IC50=0.5uM	IC50	6.3	1998	thrombin alpha	4-mer	P09945 P00734	C30H49N6O7	605.746	605.366	92	94	225.44	2.49	-0.31	6	7	21	OC[C@@H](NC(=O)[C@@H]1C[C@H]2[C@@H](N1C(=O)[C@@H](NC(=O)[C@@H](Cc1ccc(cc1)O)O)CC(C)C)C[C@@H](CC2)O)CCC[NH+]=C(N)N	0	C340H108N86O98S5+6	train
1a30	refined	Protein-Ligand	2	Ki=50uM	Ki	4.3	1998	HIV-1 protease	3-mer	P04585	C15H26N3O8	376.382	376.172	52	51	197.74	0.2	-1.18	3	8	11	CC(C[C@@H](C(=O)O)NC(=O)[C@@H](NC(=O)[C@H](CCC(=O)O)[NH3+])CC(=O)O)C	0	C265H92N75O81S+5	train
1a42	general	Protein-Ligand	2.25	Kd=0.13nM	Kd	9.89	1999	carbonic anhydrase ii	BZU	P00918	C12H22N3O5S3	384.515	384.072	45	46	168.38	-0.25	1.86	2	4	7	CC[NH2+][C@H]1CN(CCOCC)S(=O)(=O)c2c1cc(s2)S(=O)(=O)N	1	C347H101N87O78SZn+6	train
1a46	general	Protein-Ligand	2.12	Ki=2000nM	Ki	5.7	1998	thrombin alpha	00K	P09945 P00734	C28H47N6O4	531.711	531.366	85	88	158.46	1.2	0.01	6	4	14	[NH3+]CCCC[C@@H]([C@@H](C(=O)NC1CCCCC1)O)NC(=O)[C@@H]1CC[N@@H+]2N1C(=O)[C@](CC2)([NH3+])Cc1ccccc1	0	C282H86N76O82S4+7	train
1a4g	general	Protein-Ligand	2.2	IC50=0.004uM	IC50	8.4	1999	neuraminidase	ZMR	P27907	C12H21N4O7	333.318	333.141	44	44	202.33	-0.2	-3.91	4	6	9	OC[C@H]([C@H]([C@@H]1OC(=C[C@@H]([C@H]1NC(=O)C)[NH+]=C(N)N)C(=O)O)O)O	0	C271H117N93O92S+11	train
1a4h	general	Protein-Ligand	2.5	Kd=1.2uM	Kd	5.92	1998	N-terminal domain of the yeast Hsp90 chaperone	GDM	P02829	C29H40N2O9	560.636	560.273	80	81	163.48	1.99	3.44	3	5	6	CO[C@H]1C[C@@H](C)CC2=C(OC)C(=O)C=C(C2=O)NC(=O)/C(=C/C=C\[C@@H]([C@H](/C(=C/[C@@H]([C@H]1O)C)/C)OC(=O)N)OC)/C	0	C234H83N59O72S2+3	train
1a4k	refined	Protein-Ligand	2.4	Kd=0.01uM	Kd	8	1998	antibody fab	FRA	P01834	C21H23N3O7	429.423	429.154	54	57	142.11	1.26	2.03	2	6	7	OC(=O)COC(=O)N[C@]12CC[C@H](CC1)[C@@H]1[C@H]2C(=O)N(C1=O)c1ccc(cc1)NC(=O)C	0	C267H77N72O72S2+3	valid
1a4m	general	Protein-Ligand	1.95	Ki~0.1pM	Ki	13	1998	adenosine deaminase	PRH	P03958	C10H12N4O5	268.226	268.081	31	33	133.49	-2.15	-2.27	4	5	5	OC[C@H]1O[C@H]([C@@H]([C@@H]1O)O)n1cnc2c1nc[nH]c2=O	1	C315H113N81O85S5Zn+7	train
1a4q	general	Protein-Ligand	1.9	IC50=3.6uM	IC50	5.44	1999	neuraminidase	DPC	P27907	C20H28N3O5	390.453	390.203	56	57	123.58	0.12	0.34	2	4	9	CCCN(C(=O)[C@@H]1OC(=C[C@@H]([C@H]1NC(=O)C)[NH3+])C(=O)O)CCc1ccccc1	1	C295H126CaN103O100S3+12	train
1a4r	refined	Protein-Ligand	2.5	Kd=0.22uM	Kd	6.66	1999	g25k gtp-binding protein	GNH	P60953	C10H18N6O10P2	444.232	444.056	46	48	291.86	-5.89	-2.08	5	8	8	O[C@@H]1[C@@H](COP(OP(O)(O)N)(O)O)O[C@H]([C@@H]1O)n1cnc2c1nc(N)[nH]c2=O	0	C237H80N58O79S2+3	train
1a4w	refined	Protein-Ligand	1.8	Ki=1.2uM	Ki	5.92	1998	thrombin alpha	QWE	P09945 P00734	C29H40N7O4S2	614.802	614.258	82	85	202.31	5.04	4	1	5	14	O=C(N1CCCC[C@@H]1CCC(=O)c1nccs1)[C@@H](NS(=O)(=O)c1cccc2c1cccc2N(C)C)CCC[NH+]=C(N)N	0	C292H92N80O86S5+8	valid
1a50	general	Protein-Ligand	2.3	Kd=0.2uM	Kd	6.7	1999	tryptophan synthase	FIP	P00929 P0A2K1	C11H14FNO4P	274.205	274.064	32	33	99.3	0.82	1.91	1	3	4	Fc1ccc2c(c1)c(CCCOP(O)(O)O)c[nH]2	0	C347H113N82O94S2+3	train
1a52	general	Protein-Ligand	2.8	Ki=0.138nM	Ki	9.86	1998	human estrogen receptor alpha ligand-binding domain	EST	P03372	C18H24O2	272.382	272.178	44	47	40.46	3.9	3.61	2	2	2	Oc1ccc2c(c1)CC[C@@H]1[C@@H]2CC[C@]2([C@H]1CC[C@@H]2O)C	0	C322H94N75O81S9+4	valid
1a5g	general	Protein-Ligand	2.06	Ki=0.071nM	Ki	10.15	1998	thrombin alpha	00L	P09945 P00734	C30H45N8O4	581.729	581.356	87	90	196.83	2.49	-0.96	5	4	16	NC(=[NH+]CCC[C@@H]([C@@H](C(=O)NCCc1ccccc1)O)NC(=O)[C@@H]1CC[N@@H+]2N1C(=O)[C@](CC2)([NH3+])Cc1ccccc1)N	0	C275H92N71O82S4+4	train
1a5h	general	Protein-Ligand	2.9	Ki=0.5uM	Ki	6.3	1999	tissue plasminogen activator	BBA	P00750	C23H30N4O	378.511	378.242	58	60	120.29	7.04	1.18	0	1	6	O=C1[C@@H](CCCC[C@H]1Cc1ccc(cc1)C(=[NH2+])N)Cc1ccc(cc1)C(=[NH2+])N	0	C276H102N75O89S6+4	valid
1a5v	general	Protein-Ligand	1.9	IC50=800uM	IC50	3.1	1998	hiv-1 integrase	_Y3	O92956	C12H11NO8S2	361.348	360.993	34	35	174.83	0.04	3.23	4	8	7	CC(=O)Nc1cc(cc2c1c(O)cc(c2)S(=O)(=O)O)S(=O)(=O)O	0	C135H45N39O44S+2	test
1a61	general	Protein-Ligand	2.2	Ki=2.4nM	Ki	8.62	1998	thrombin alpha	00N	P09945 P00734	C24H37N8O3S	517.667	517.271	73	76	208.86	1.75	-0.88	4	4	12	O=C([C@@H]1CC[N@@H+]2N1C(=O)[C@](CC2)([NH3+])Cc1ccccc1)N[C@H]([C@@H](c1nccs1)O)CCC[NH+]=C(N)N	0	C234H81N69O70S5+6	valid
1a69	refined	Protein-Ligand	2.1	Ki=5uM	Ki	5.3	1998	purine nucleoside phosphorylase	FMB	P0ABP8	C10H12N4O5	268.226	268.081	31	33	144.35	-2.47	-2.2	5	5	5	OC[C@H]1O[C@H]([C@@H]([C@@H]1O)O)c1n[nH]c2c1nc[nH]c2=O	0	C283H113N84O84S6+8	train
1a7t	general	Protein-Ligand	1.85	Ki=23mM	Ki	1.64	1998	metallo-beta-lactamase	MES	P25910	C6H14NO4S	196.245	196.064	26	26	76.42	-3.5	0.44	2	3	4	OS(=O)(=O)CC[NH+]1CCOCC1	1	C178H65N55O58S4Zn2+4	valid
1a7x	general	Protein-Ligand	2	Kd=0.2nM	Kd	9.7	1998	FK506 binding protein	FKA	P62942	C51H76N2O14	941.154	940.53	143	147	216.69	5.99	5.78	4	8	15	CO[C@H]1C[C@@H](C)C/C(=C/[C@@H](CCOC(=O)NCc2ccccc2)C(=O)C[C@H](O)[C@H]([C@H](OC(=O)[C@H]2N(/[C](=[C](\O)/[C@@]3(O[C@H]1[C@@H](OC)C[C@H]3C)O)/O)CCCC2)/C(=C/[C@@H]1CC[C@H]([C@@H](C1)OC)O)/C)C)/C	0	C457H137N112O107S3+12	valid
1a85	general	Protein-Ligand	2	IC50=30uM	IC50	4.52	1999	matrix metalloproteinase 8	0DY	P22894	C18H27N5O5	393.437	393.201	55	55	176.64	-0.74	1.87	6	5	14	ONC(=O)[C@H](C(=O)N[C@H](C(=O)NCc1cccc(c1)N)CC(=O)N)CC(C)C	1	C233H65CaN61O59SZn+5	train
1a86	general	Protein-Ligand	2	IC50=101uM	IC50	4	1999	matrix metalloproteinase 8	0ZB	P22894	C18H25N3O6	379.408	379.174	52	52	144.83	2.03	1.6	4	6	13	ONC(=O)[C@H](C(=O)N[C@H](C(=O)NCc1ccccc1)CC(=O)O)CC(C)C	1	C274H83CaN68O72SZn+5	train
1a8i	general	Protein-Ligand	1.78	Ki=3.0uM	Ki	5.52	1998	glycogen phosphorylase b	GLS	P00489	C8H12N2O7	248.19	248.064	29	30	148.35	-3.38	-3.35	6	6	5	OC[C@H]1O[C@@]2(NC(=O)NC2=O)[C@@H]([C@H]([C@@H]1O)O)O	0	C279H114N86O93PS+7	train
1a8t	general	Protein-Ligand	2.55	Ki=1.6uM	Ki	5.8	1998	metallo-beta-lactamase	061	P25910	C26H24N6O2	452.508	452.196	58	62	109.58	4.3	4.34	2	5	8	CCCCc1nc2ccc(cc2c(=O)n1Cc1ccc(cc1)c1ccccc1c1nnn[nH]1)O	1	C252H84N72O74S4Zn2+5	valid
1a94	refined	Protein-Ligand	2	Ki=14nM	Ki	7.85	1999	HIV-1 protease	0Q4	P03367	C40H69N11O9	848.044	847.528	129	129	348.64	1.97	0.59	8	9	33	CCCC[C@@H](C(=O)N)NC(=O)[C@@H](NC(=O)[C@@H](NC(=O)[C@@H](NC(=O)[C@@H](NC(=O)[C@H](C(C)C)NC(=O)[C@H](CCC[NH+]=C(N)N)[NH3+])CC(C)C)Cc1ccccc1)CCC(=O)O)C	0	C365H118N97O103S2+6	train
1a99	refined	Protein-Ligand	2.2	Kd=2uM	Kd	5.7	1998	putrescine-binding protein	PUT	P31133	C4H14N2	90.167	90.116	20	19	55.28	-0.94	-1.75	2	0	3	[NH3+]CCCC[NH3+]	0	C268H88N59O76S2+	train
1a9m	refined	Protein-Ligand	2.3	Ki=119nM	Ki	6.92	1998	HIV-1 protease G48H	U0E	P03366	C28H53N8O6	597.77	597.409	95	95	259.72	1.89	1.31	6	6	23	NC(=O)CC[C@@H](C(=O)N[C@H](C(=O)N)CCC[NH+]=C(N)N)NC(=O)[C@H](C(C)C)C[C@@H]([C@@H](NC(=O)C)CC1CCCCC1)O	0	C309H111N85O89S+6	test
1a9q	refined	Protein-Ligand	2	Kd=0.68uM	Kd	6.17	1998	bovine Purine nucleoside phosphorylase (PNP)	HPA	P55859	C5H4N4O	136.111	136.039	14	15	74.43	-0.49	-0.35	2	2	0	O=c1[nH]cnc2c1nc[nH]2	0	C202H70N57O60S2+3	valid
1a9u	general	Protein-Ligand	2.5	IC50=0.048uM	IC50	7.32	1999	p38 map kinase	SB2	Q16539	C21H16FN3OS	377.435	377.1	43	46	77.85	3.2	5.55	1	3	3	Fc1ccc(cc1)c1nc([nH]c1c1ccncc1)c1ccc(cc1)[S@@](=O)C	0	C273H85N73O70S3+6	test
1aaq	refined	Protein-Ligand	2.5	Ki=4.0nM	Ki	8.4	1994	HIV-1 protease	PSI	P03367	C29H48N5O7	578.721	578.355	89	89	190.57	1.79	1.01	6	6	22	COC(=O)[C@H](C(C)C)NC(=O)[C@H](C(C)C)NC(=O)CC[C@@H]([C@@H](NC(=O)[C@@H](NC(=O)[C@@H]([NH3+])C)C)Cc1ccccc1)O	0	C334H105N89O93S2+6	test
1abf	general	Protein-Ligand	1.9	Kd=3.8uM	Kd	5.42	1993	apolipoprotein	FCA/FCB	P02924	C6H12O5	164.156	164.068	23	23	90.15	-2.09	-2.19	4	4	4	O[C@H]1[C@@H](C)O[C@@H]([C@@H]([C@H]1O)O)O	0	C245H101N68O82S4+4	test
1abt	general	Protein-Ligand	NMR	Kd=1.4uM	Kd	5.85	1994	a-bungarotoxin (BGTX)	12-mer	P02710 P60615	C46H60N10O9	897.03	896.454	125	129	323.01	0.41	1.71	12	10	32	[NH3+]CCCC[C@@H](C(=O)N[C@H](C(=O)N[C@H](C(=O)N[C@H](C(=O)N[C@H](C(=O)N[C@H](C(=O)O)Cc1ccc(cc1)O)Cc1ccc(cc1)O)C(C)C)Cc1c[nH]c2c1cccc2)Cc1c[nH]cn1)[NH3+]	0	C162H52N47O48S5+5	train
1acj	general	Protein-Ligand	2.8	IC50=8.2nM	IC50	8.09	1994	Torpedo californica acetylcholinesterase (AChE)	THA	P04058	C13H14N2	198.264	198.116	29	31	38.91	2.74	3.28	1	1	0	Nc1c2CCCCc2nc2c1cccc2	0	C341H105N70O89S2+2	valid
1ad8	general	Protein-Ligand	2	Ki=0.25uM	Ki	6.6	1997	thrombin	MDL	P01050 P00734	C28H32F5N4O3	567.571	567.239	72	75	102.04	4.5	2.88	4	3	13	C[NH2+][C@@H](C(=O)N1CCC[C@H]1C(=O)N[C@H]([C@@H](C(C(F)(F)F)(F)F)O)Cc1c[nH]c2c1cccc2)Cc1ccccc1	0	C306H110N83O93S6+7	test
1add	refined	Protein-Ligand	2.4	Ki=0.18uM	Ki	6.74	1994	adenosine deaminase	1DA	P03958	C11H14N4O4	266.253	266.102	33	35	126.65	-1.59	-0.79	4	5	5	OC[C@H]1O[C@H]([C@@H]([C@@H]1O)O)n1cnc2c1nccc2N	1	C315H114N81O85S5Zn+8	valid
1adl	refined	Protein-Ligand	1.6	Kd=4.4uM	Kd	5.36	1994	trp rna-binding attenuation protein	ACD	P04117	C20H32O2	304.467	304.24	54	53	37.3	7.73	6.22	0	2	13	CCCCC/C=C\C/C=C\C/C=C\C/C=C\CCCC(=O)O	0	C322H117N90O99S5+10	train
1ado	refined	Protein-Ligand	1.9	Kd=1uM	Kd	6	1997	fructose 1,6-bisphosphate aldolase	13P	P00883	C3H8O6P	171.066	171.006	18	17	120.81	-2.62	-1.78	1	5	4	OCC(=O)COP(O)(O)O	0	C245H86N66O69S+7	valid
1af2	general	Protein-Ligand	2.3	Ki=0.8mM	Ki	3.1	1997	cytidine deaminase	__U	P0ABF6	C9H12N2O6	244.201	244.07	29	30	124.78	-2.3	-2.85	4	5	5	OC[C@H]1O[C@H]([C@@H]([C@@H]1O)O)n1ccc(=O)[nH]c1=O	1	C273H94N76O82S5Zn+3	test
1af6	general	Protein-Ligand	2.4	Kd=15mM	Kd	1.82	1998	maltoporin	GLC-FRU	P02943	C12H22O11	342.296	342.116	45	46	189.53	-3.88	-5.4	8	8	13	OC[C@H]1O[C@@]([C@H]([C@@H]1O)O)(CO)O[C@H]1O[C@H](CO)[C@H]([C@@H]([C@H]1O)O)O	0	C290H102N85O76S2+13	valid
1afk	refined	Protein-Ligand	1.7	Ki=240nM	Ki	6.62	1998	ribonuclease a	PAP	P61823	C10H19N5O13P3	510.205	510.019	50	52	329.38	-6.15	-2.36	2	12	7	O[C@@H]1[C@H](OP(O)(O)O)[C@H](O[C@H]1n1cnc2c1ncnc2N)COP(OP(O)(O)O)(O)O	0	C188H61N54O57S3+5	train
1afl	refined	Protein-Ligand	1.7	Ki=520nM	Ki	6.28	1998	ribonuclease a	ATR	P61823	C10H19N5O13P3	510.205	510.019	50	52	329.38	-6.15	-2.36	2	12	7	O[C@@H]1[C@@H](COP(OP(O)(O)O)(O)O)O[C@H]([C@@H]1OP(O)(O)O)n1cnc2c1ncnc2N	0	C189H56N55O56S3+8	valid
1ag9	general	Protein-Ligand	1.8	Kd=1nM	Kd	9	1997	flavodoxin	FMN	P61949	C17H24N4O9P	459.368	459.128	55	57	230.64	-2.43	-1.57	6	8	9	O=c1[nH]c(=O)c2c([nH]1)n(C[C@@H]([C@@H]([C@@H](COP(O)(O)O)O)O)O)c1c([nH]2)cc(c(c1)C)C	1	C300H96CaN71O99S4+2	train
1agm	general	Protein-Ligand	2.4	Ki=1pM	Ki	12	1994	glucoamylase-471	ACR	P69327	C25H44NO18	646.613	646.256	88	91	325.75	-8.53	-9.59	14	13	22	OC[C@H]1O[C@H](O[C@@H]2[C@@H](CO)O[C@H]([C@@H]([C@H]2O)O)O)[C@@H]([C@H]([C@@H]1O[C@H]1O[C@H](C)[C@H]([C@@H]([C@H]1O)O)[NH2+][C@H]1C=C(CO)[C@H]([C@@H]([C@H]1O)O)O)O)O	0	C326H103N77O91+5	valid
1agw	general	Protein-Ligand	2.4	IC50=20uM	IC50	4.7	1998	fibroblast growth factor receptor 1	SU2	P11362	C20H19N3O2	333.384	333.148	44	47	52.65	2.3	3.23	1	2	3	O=CN1CCN(CC1)c1ccc(cc1)/C=C/1\C(=O)Nc2c1cccc2	0	C257H75N65O68S+8	train
1aht	general	Protein-Ligand	1.6	Ki=0.62uM	Ki	6.21	1996	thrombin alpha	APA	P01050 P00734	C10H13N2O3	209.222	209.093	28	28	109.14	2.8	-1.16	1	3	4	OC(=O)[C@H](Cc1ccc(cc1)C(=[NH2+])N)O	0	C207H77N54O64S4+4	test
1ahx	general	Protein-Ligand	2	Kd=120uM	Kd	3.92	1995	aspartate aminotransferase	HCI	P00509	C9H10O2	150.174	150.068	21	21	37.3	3.12	1.7	0	2	2	OC(=O)CCc1ccccc1	0	C274H90N76O79+6	valid
1ahy	general	Protein-Ligand	2.3	Kd=440uM	Kd	3.36	1995	aspartate aminotransferase	MAE	P00509	C4H4O4	116.072	116.011	12	11	74.6	2.16	-0.29	0	4	0	OC(=O)/C=C\C(=O)O	0	C264H78N74O69S2+5	train
1ai4	refined	Protein-Ligand	2.35	Ki=3.13mM	Ki	2.5	1997	penicillin amidohydrolase	DHY	P06875	C8H8O4	168.147	168.042	20	20	77.76	2.12	0.72	2	4	3	OC(=O)Cc1ccc(c(c1)O)O	0	C268H91N65O72S2+3	train
1ai5	refined	Protein-Ligand	2.36	Ki=0.189mM	Ki	3.72	1997	penicillin amidohydrolase	MNP	P06875	C8H7NO4	181.145	181.038	20	20	83.12	2.66	1.75	0	4	1	OC(=O)Cc1cccc(c1)N(=O)=O	0	C274H93N70O77S2+4	train
1ai6	general	Protein-Ligand	2.55	Ki=0.107mM	Ki	3.97	1997	penicillin amidohydrolase	4HP	P06875	C8H8O3	152.147	152.047	19	19	57.53	2.47	1.02	1	3	2	OC(=O)Cc1ccc(cc1)O	0	C276H92N67O74S2+4	train
1ai7	refined	Protein-Ligand	2.5	Ki=0.082mM	Ki	4.09	1997	penicillin amidohydrolase	IPH	P06875	C6H6O	94.111	94.042	13	13	20.23	1.57	1.39	1	1	1	Oc1ccccc1	0	C238H80N59O66S2+3	train
1aid	refined	Protein-Ligand	2.2	Ki=15uM	Ki	4.82	1997	HIV-1 protease	THK	P03369	C23H28ClFNOS2	453.056	452.128	57	60	75.27	5.38	6.03	2	1	7	Fc1ccc(cc1)C1(CCC[N@@H+]2CC[C@@](CC2)(O)c2ccc(cc2)Cl)SCCS1	0	C310H107N83O86S2+7	valid
1aj6	general	Protein-Ligand	2.3	Kd=1.2uM	Kd	5.92	1998	DNA gyrase b	NOV	P0AES6	C31H36N2O11	612.624	612.232	80	83	200.01	3.32	4.4	5	6	13	CO[C@@H]1[C@@H](OC(=O)N)[C@@H](O)[C@@H](OC1(C)C)Oc1ccc2c(c1C)oc(=O)c(c2O)NC(=O)c1ccc(c(c1)CC=C(C)C)O	0	C242H89N71O75S2+6	train
1aj7	refined	Protein-Ligand	2.1	Kd=135uM	Kd	3.87	1997	immunoglobulin 48g7 germline fab	NPE	P01857	C11H15NO7P	304.213	304.059	35	35	146.4	2.15	2.5	0	6	6	OC(=O)CCCCP(Oc1ccc(cc1)N(=O)=O)(O)O	0	C288H81N65O70S2+5	train
1ajn	refined	Protein-Ligand	2.36	Ki=2.32mM	Ki	2.63	1997	penicillin amidohydrolase	AAN	P06875	C8H7NO4	181.145	181.038	20	20	83.12	2.66	1.75	0	4	1	OC(=O)Cc1ccc(cc1)N(=O)=O	0	C287H99N71O80S2+4	train
1ajp	refined	Protein-Ligand	2.31	Ki=5.85mM	Ki	2.23	1997	penicillin amidohydrolase	OMD	P06875	C8H8O4	168.147	168.042	20	20	77.76	2.12	0.72	2	4	3	OC(=O)Cc1cc(O)ccc1O	0	C269H93N66O76S2+3	test
1ajq	refined	Protein-Ligand	2.05	Ki=0.049mM	Ki	4.31	1997	penicillin amidohydrolase	SPA	P06875	C6H6O2S	142.176	142.009	15	15	65.54	2.54	1.38	0	2	1	OC(=O)Cc1cccs1	0	C244H80N61O65S2+3	valid
1ajv	refined	Protein-Ligand	2	Ki=19.1nM	Ki	7.72	1997	HIV-1 protease	NMB	P03366	C32H34N2O6S	574.687	574.214	75	79	107.92	4.42	4.82	2	4	12	O[C@@H]1[C@@H](O)[C@@H](COc2ccccc2)N(S(=O)(=O)N([C@@H]1COc1ccccc1)Cc1ccccc1)Cc1ccccc1	0	C351H112N93O98S2+6	test
1ajx	refined	Protein-Ligand	2	Ki=12.2nM	Ki	7.91	1997	HIV-1 protease	AH1	P03366	C33H34N2O5	538.633	538.247	74	78	82.47	4.73	4.62	2	3	12	O[C@@H]1[C@@H](O)[C@@H](COc2ccccc2)N(C(=O)N([C@@H]1COc1ccccc1)Cc1ccccc1)Cc1ccccc1	0	C333H109N89O93S+6	valid
1akq	general	Protein-Ligand	1.9	Kd=0.79nM	Kd	9.1	1998	flavodoxin	FMN ox	P00323	C17H22N4O9P	457.352	457.112	53	55	224.84	-2.56	-2	4	8	9	O=c1[nH]c(=O)c2c(n1)n(C[C@@H]([C@@H]([C@@H](COP(O)(O)O)O)O)O)c1c(n2)cc(c(c1)C)C	0	C218H63N57O80S3+2	train
1akr	general	Protein-Ligand	1.58	Kd=0.82nM	Kd	9.09	1998	flavodoxin	FMN ox	P00323	C17H22N4O9P	457.352	457.112	53	55	224.84	-2.56	-2	4	8	9	O=c1[nH]c(=O)c2c(n1)n(C[C@@H]([C@@H]([C@@H](COP(O)(O)O)O)O)O)c1c(n2)cc(c(c1)C)C	0	C201H63N53O75S3+2	valid
1akt	general	Protein-Ligand	1.8	Kd=3.2nM	Kd	8.49	1998	flavodoxin	FMN ox	P00323	C17H22N4O9P	457.352	457.112	53	55	224.84	-2.56	-2	4	8	9	O=c1[nH]c(=O)c2c(n1)n(C[C@@H]([C@@H]([C@@H](COP(O)(O)O)O)O)O)c1c(n2)cc(c(c1)C)C	0	C212H64N56O80S3+2	train
1aku	general	Protein-Ligand	1.9	Kd=746nM	Kd	6.13	1998	flavodoxin	FMN hq	P00323	C17H24N4O9P	459.368	459.128	55	57	230.64	-2.43	-1.57	6	8	9	O=c1[nH]c(=O)c2c([nH]1)n(C[C@@H]([C@@H]([C@@H](COP(O)(O)O)O)O)O)c1c([nH]2)cc(c(c1)C)C	0	C218H63N57O80S3+2	valid
1akv	general	Protein-Ligand	2	Kd=0.0026nM	Kd	11.59	1998	flavodoxin	FMN sq	P00323	C17H24N4O9P	459.368	459.128	55	57	230.64	-2.43	-1.57	6	8	9	O=c1[nH]c(=O)c2c([nH]1)n(C[C@@H]([C@@H]([C@@H](COP(O)(O)O)O)O)O)c1c([nH]2)cc(c(c1)C)C	0	C221H66N57O84S3+2	test
1akw	general	Protein-Ligand	1.75	Kd=2.6nM	Kd	8.59	1998	flavodoxin	FMN ox	P00323	C17H22N4O9P	457.352	457.112	53	55	224.84	-2.56	-2	4	8	9	O=c1[nH]c(=O)c2c(n1)n(C[C@@H]([C@@H]([C@@H](COP(O)(O)O)O)O)O)c1c(n2)cc(c(c1)C)C	0	C204H63N53O75S3+2	train
1al7	general	Protein-Ligand	2.6	Ki=16nM	Ki	7.8	1997	glycolate oxidase	HST	P05414	C14H25N3O2S	299.432	299.167	45	45	104.17	5.9	4.12	1	4	10	CCCCCC(Sc1[nH]nnc1C(=O)O)CCCCC	0	C308H101N84O87S3+8	train
1al8	general	Protein-Ligand	2.2	Ki=4.8uM	Ki	5.32	1997	glycolate oxidase	DHP	P05414	C14H23NO3	253.337	253.168	41	41	66.4	4.29	3.31	2	3	10	CCCCCCCCCCC1=C(O)C(=O)NC1=O	0	C298H102N80O81S2+10	valid
1alw	refined	Protein-Ligand	2.03	Ki=0.3uM	Ki	6.52	1998	calpain	ISA	P04574	C9H10O2S	182.239	182.04	22	22	76.1	2.98	1.61	0	2	3	S[C@H](C(=O)O)Cc1ccccc1	0	C223H68N53O49S2+6	train
1amk	refined	Protein-Ligand	1.83	Ki=50uM	Ki	4.3	1997	TRIOSE PHOSPHATE ISOMERASE	PGA	P48499	C2H6O6P	157.039	156.99	15	14	120.81	-1.24	-1.26	0	5	1	OC(=O)COP(O)(O)O	0	C227H88N57O66S2+	test
1amn	general	Protein-Ligand	2.8	Ki=15fM	Ki	13.82	1996	acetylcholinesterase	NAF	P04058	C11H15F3NO2	250.238	250.105	32	32	40.46	1.34	1.58	2	2	4	FC(C(c1cccc(c1)[N+](C)(C)C)(O)O)(F)F	0	C334H101N70O93S+	train
1amw	refined	Protein-Ligand	1.85	Kd=29uM	Kd	4.54	1998	heat shock protein 90	ADP	P02829	C10H17N5O10P2	429.217	429.045	44	46	266.1	-4.89	-2.04	3	10	7	O[C@@H]1[C@@H](COP(OP(O)(O)O)(O)O)O[C@H]([C@@H]1O)n1cnc2c1ncnc2N	0	C268H96N66O83S+4	test
1anf	general	Protein-Ligand	1.67	Ki=3.5uM	Ki	5.46	1997	maltodextrin binding protein	GLC-GLC	P0AEX9	C12H22O11	342.296	342.116	45	46	189.53	-4.73	-5.4	8	8	12	OC[C@H]1O[C@H](O)[C@@H]([C@H]([C@@H]1O[C@H]1O[C@H](CO)[C@H]([C@@H]([C@H]1O)O)O)O)O	0	C286H86N69O74S2+4	train
1ao0	general	Protein-Ligand	2.8	Kd=11.0uM	Kd	4.96	1997	glutamine phosphoribosylpyrophosphate	ADP	P00497	C10H17N5O10P2	429.217	429.045	44	46	266.1	-4.89	-2.04	3	10	7	O[C@@H]1[C@@H](COP(OP(O)(O)O)(O)O)O[C@H]([C@@H]1O)n1cnc2c1ncnc2N	1	C314H117MgN88O91S2+10	train
1ao8	general	Protein-Ligand	NMR	IC50=6nM	IC50	8.22	1998	Lactobacillus casei dihydrofolate reductase	MTX	P00381	C20H24N8O5	456.455	456.187	57	59	203.17	4.16	1.44	1	7	8	NC1[NH+]C(=[NH+]c2c1nc(CN(c1ccc(cc1)C(=O)N[C@H](C(=O)O)CCC(=O)O)C)cn2)N	0	C327H84N91O82S2+10	train
1apb	general	Protein-Ligand	1.76	Kd=1.51uM	Kd	5.82	1992	apolipoprotein	FCA/FCB	P02924	C6H12O5	164.156	164.068	23	23	90.15	-2.09	-2.19	4	4	4	O[C@H]1[C@@H](C)O[C@H]([C@@H]([C@H]1O)O)O	0	C230H95N65O78S4+4	valid
1apv	refined	Protein-Ligand	1.8	Ki=1nM	Ki	9	1994	penicillopepsin	5-mer	P00798	C24H44F2N4O6	522.626	522.323	80	79	156.86	2.58	2.47	6	6	20	CNC(=O)C(C([C@@H](NC(=O)[C@H](C(C)C)NC(=O)[C@H](C(C)C)NC(=O)CC(C)C)CC(C)C)(O)O)(F)F	0	C358H118N84O120	train
1apw	general	Protein-Ligand	1.8	Ki=10nM	Ki	8	1994	penicillopepsin	5-mer	P00798	C24H44F2N4O5	506.627	506.328	79	78	136.63	3.35	3.15	5	5	19	CNC(=O)C([C@@H]([C@@H](NC(=O)[C@H](C(C)C)NC(=O)[C@H](C(C)C)NC(=O)CC(C)C)CC(C)C)O)(F)F	0	C371H127N90O123+	train
1aq7	general	Protein-Ligand	2.2	IC50=0.9uM	IC50	6.05	1998	trypsin	4-mer	P00760	C29H47N6O9S	655.783	655.313	92	94	256.96	2.73	1.24	5	8	21	CC[C@H]([C@H](C(=O)N1[C@H]2C[C@@H](CC[C@H]2C[C@H]1C(=O)NCCCC[NH+]=C(N)N)OS(=O)(=O)O)NC(=O)[C@@H](Cc1ccc(cc1)O)O)C	0	C241H87N65O79S5+2	train
1aqi	general	Protein-Ligand	2.6	Kd=2.4uM	Kd	5.62	1997	adenine-n6-dna-methyltransferase taqi	SAH	P14385	C14H21N6O5S	385.419	385.129	47	49	209.55	-3.47	-1.57	4	7	8	OC(=O)[C@H](CCSC[C@H]1O[C@H]([C@@H]([C@@H]1O)O)n1cnc2c1ncnc2N)[NH3+]	0	C295H90N63O70S2+4	train
1aqj	general	Protein-Ligand	2.6	Kd=0.34uM	Kd	6.47	1997	adenine-n6-dna-methyltransferase taqi	SFG	P14385	C15H25N7O5	383.403	383.192	52	54	211.89	-4.28	-2.92	5	7	8	OC(=O)[C@H](CC[C@@H](C[C@H]1O[C@H]([C@@H]([C@@H]1O)O)n1cnc2c1ncnc2N)[NH3+])[NH3+]	0	C298H91N64O71S2+4	train
1at5	general	Protein-Ligand	1.8	Kd=64uM	Kd	4.19	1998	lysozyme	3-mer	P00698	C24H41N3O16	627.593	627.249	84	86	295.29	-6.88	-5.97	11	11	21	OC[C@H]1O[C@@H](O[C@@H]2[C@@H](CO)O[C@H]([C@@H]([C@H]2O)NC(=O)C)O)[C@@H]([C@H]([C@@H]1O[C@@H]1O[C@H](CO)[C@H]([C@@H]([C@H]1NC(=O)C)O)O)O)NC(=O)C	0	C239H73N70O63S3+7	train
1at6	general	Protein-Ligand	1.8	Kd=85uM	Kd	4.07	1998	lysozyme	3-mer	P00698	C24H41N3O16	627.593	627.249	84	86	295.29	-6.88	-5.97	11	11	21	OC[C@H]1O[C@@H](O[C@@H]2[C@@H](CO)O[C@H]([C@@H]([C@H]2O)NC(=O)C)O)[C@@H]([C@H]([C@@H]1O[C@@H]1O[C@H](CO)[C@H]([C@@H]([C@H]1NC(=O)C)O)O)O)NC(=O)C	0	C225H69N69O64S2+6	valid
1atl	refined	Protein-Ligand	1.8	Ki=0.52uM	Ki	6.28	1995	atrolysin c	SLE-TYR	P15167	C17H25NO4S	339.45	339.15	48	48	114.43	3.93	2.79	1	3	10	SC[C@H](C(=O)N[C@H](C(=O)O)Cc1ccc(cc1)OC)CC(C)C	1	C222H73N60O64S5Zn+7	test
1au0	general	Protein-Ligand	2.6	Ki=22nM	Ki	7.66	1998	cathepsin k	SDK	P43235	C31H44N4O7	584.704	584.321	86	87	155.09	4.17	4.83	5	5	23	O[C@@H](CNC(=O)[C@@H](NC(=O)OCc1ccccc1)CC(C)C)CNC(=O)[C@@H](NC(=O)OCc1ccccc1)CC(C)C	0	C260H73N74O86S4+2	test
1au2	general	Protein-Ligand	2.6	Ki=13nM	Ki	7.89	1998	cathepsin k	POS	P43235	C27H32N4O6S	540.631	540.204	70	72	155.1	2.77	4.73	4	6	16	O[C@@H](CNS(=O)(=O)c1ccc(cc1)Oc1ccccc1)CNC(=O)[C@@H](NC(=O)c1ccncc1)CC(C)C	0	C236H67N68O79S4+2	train
1auj	general	Protein-Ligand	2.1	Ki=5.6nM	Ki	8.25	1998	trypsin	PPB	P00760	C23H28BN4O4	435.304	435.22	60	62	141.3	1.35	0.19	4	5	12	N#Cc1cccc(c1)C[C@@H](B(O)O)NC(=O)[C@@H]1CCCN1C(=O)[C@@H](Cc1ccccc1)[NH3+]	0	C232H72N63O74S5+2	test
1avd	general	Protein-Ligand	2.7	Kd=1fM	Kd	15	1994	avidin	BTN	P02701	C10H16N2O3S	244.311	244.088	32	33	103.73	1.78	1.45	2	3	4	OC(=O)CCCC[C@@H]1SC[C@H]2[C@@H]1NC(=O)N2	0	C289H97N74O87S2+5	train
1avn	refined	Protein-Ligand	2	Kd=0.125mM	Kd	3.9	1997	carbonic anhydrase ii	HSM	P00918	C5H10N3	112.153	112.087	18	18	56.32	-0.58	-0.81	2	1	2	C(c1cnc[nH]1)C[NH3+]	1	C194H68N47O41Zn+4	train
1aw1	general	Protein-Ligand	2.7	Ki=89mM	Ki	1.05	1998	triosephosphate isomerase	PGA	P50921	C2H6O6P	157.039	156.99	15	14	120.81	-1.24	-1.26	0	5	1	OC(=O)COP(O)(O)O	0	C227H77N57O61S2+3	train
1awf	general	Protein-Ligand	2.2	Ki=0.97uM	Ki	6.01	1998	thrombin alpha	GR4	P01050 P00734	C38H56O14	736.843	736.367	108	112	237.58	0.05	0.5	7	11	19	O=C[C@@H]([C@@H]1[C@@H](O)C[C@]2([C@@]1(C)[C@@H](O)C[C@H]1C2=CC[C@@H]2[C@]1(C)CC[C@H]([C@@]2(C)C(=O)O[C@H]1O[C@@H](CO)[C@@H]([C@H]([C@@H]1O)O)O)OC(=O)C)CO)CC(=O)C=C(C)C	0	C336H103N91O89S5+7	train
1awh	general	Protein-Ligand	3	Ki=0.83uM	Ki	6.08	1998	thrombin alpha	GR3	P00734	C32H48O7	544.719	544.34	87	90	121.13	5.91	5.09	2	6	9	OC[C@@H]([C@@H]1[C@@H](O)C[C@]2([C@@]1(C)CC[C@H]1C2=CC[C@@H]2[C@]1(C)CC[C@H]([C@@]2(C)C(=O)O)OC(=O)C)C)CC(=O)C=C(C)C	0	C278H96N80O84S5+7	train
1awi	general	Protein-Ligand	2.2	Kd=90uM	Kd	4.05	1998	profilin	10-mer	P07737	C50H73N10O11	990.175	989.546	144	153	236.7	-1.02	-0.27	1	11	18	OC(=O)[C@@H]1CCCN1C(=O)[C@@H]1CCCN1C(=O)[C@@H]1CCCN1C(=O)[C@@H]1CCCN1C(=O)[C@@H]1CCCN1C(=O)[C@@H]1CCCN1C(=O)[C@@H]1CCCN1C(=O)[C@@H]1CCCN1C(=O)[C@@H]1CCCN1C(=O)[C@@H]1CCC[NH2+]1	0	C324H94N88O91S5+11	train
1ax0	refined	Protein-Ligand	1.9	Kd=0.746mM	Kd	3.13	1998	lectin	A2G	P16404	C8H15NO6	221.208	221.09	30	30	119.25	-2.59	-2.69	5	5	7	OC[C@H]1O[C@H](O)[C@@H]([C@H]([C@H]1O)O)NC(=O)C	1	C170H56CaN46O58+	train
1ax1	general	Protein-Ligand	1.95	Kd=0.515mM	Kd	3.29	1998	lectin	GLC-GAL	P16404	C12H22O11	342.296	342.116	45	46	189.53	-4.73	-5.4	8	8	12	OC[C@H]1O[C@@H](O)[C@@H]([C@H]([C@@H]1O[C@@H]1O[C@H](CO)[C@@H]([C@@H]([C@H]1O)O)O)O)O	1	C160H51CaN43O51+2	valid
1ax2	general	Protein-Ligand	1.95	Kd=0.103mM	Kd	3.99	1998	lectin	NAG-GAL	P16404	C14H25NO11	383.348	383.143	51	52	198.4	-4.74	-4.86	8	8	13	OC[C@H]1O[C@H](O)[C@@H]([C@H]([C@@H]1O[C@@H]1O[C@H](CO)[C@@H]([C@@H]([C@H]1O)O)O)O)NC(=O)C	1	C166H54CaN46O52+2	train
1axr	general	Protein-Ligand	2.3	Ki=540uM	Ki	3.27	1998	glycogen phosphorylase	HTP	P00489	C7H11N3O4	201.18	201.075	25	26	111.63	-2.75	-2.42	4	6	5	OC[C@@H]1[C@@H](O)[C@H](O)[C@H](c2n1nnc2)O	0	C236H91N77O78S+6	test
1axs	general	Protein-Ligand	2.6	Kd=17nM	Kd	7.77	1998	oxy-cope catalytic antibody	HOP	Q7Z3Y4 P01857	C23H27NO4	381.465	381.194	55	57	86.63	4.71	4.08	2	4	8	OC(=O)CCCNC(=O)c1ccc(cc1)[C@H]1CC[C@@H](C[C@@H]1O)c1ccccc1	0	C377H94N82O91S2+7	valid
1axz	general	Protein-Ligand	1.95	Kd=0.637mM	Kd	3.2	1998	lectin	GAL	P16404	C6H12O6	180.156	180.063	24	24	110.38	-2.59	-3.22	5	5	6	OC[C@H]1O[C@@H](O)[C@@H]([C@H]([C@H]1O)O)O	1	C160H51CaN43O51+2	valid
1ayu	general	Protein-Ligand	2.2	Ki=0.7nM	Ki	9.15	1998	cathepsin k	INA	P43235	C29H44N6O7	588.696	588.327	86	87	188.31	3.89	1.7	7	5	23	O[C@@H]([NH2+]NC(=O)[C@@H](NC(=O)OCc1ccccc1)CC(C)C)[NH2+]NC(=O)[C@@H](NC(=O)OCc1ccccc1)CC(C)C	0	C257H80N73O86S4+	valid
1ayv	general	Protein-Ligand	2.3	Ki=10nM	Ki	8	1998	cathepsin k	IN6	P43235	C31H42N5O6S	612.76	612.286	85	87	183.73	5.05	5.26	5	5	21	CC(C[C@@H](C(=O)N[NH2+][C@H](c1csc(n1)[C@@H](NC(=O)OCc1ccccc1)CC(C)C)O)NC(=O)OCc1ccccc1)C	0	C264H70N75O87S4+	test
1aze	general	Protein-Ligand	NMR	Kd=60uM	Kd	4.22	1999	growth factor receptor-bound protein 2 (grb2)	10-mer	P26675 P62993	C53H95N19O11	1174.44	1173.75	178	182	480.92	1.77	-5.25	5	11	36	CC([C@@H](C(=O)N1CCC[C@H]1C(=O)N1CCC[C@H]1C(=O)N[C@H](C(=O)N[C@H](C(=O)N[C@H](C(=O)O)CCC[NH+]=C(N)N)CCC[NH+]=C(N)N)CCC[NH+]=C(N)N)NC(=O)[C@@H]1CCCN1C(=O)[C@@H]1CCCN1C(=O)[C@@H]1CCCN1C(=O)[C@H](C(C)C)[NH3+])C	0	C150H39N37O40+5	train
1azl	general	Protein-Ligand	1.8	Kd=2.4nM	Kd	8.62	1998	flavodoxin	FMN ox	P00323	C17H22N4O9P	457.352	457.112	53	55	224.84	-2.56	-2	4	8	9	O=c1[nH]c(=O)c2c(n1)n(C[C@@H]([C@@H]([C@@H](COP(O)(O)O)O)O)O)c1c(n2)cc(c(c1)C)C	0	C209H62N54O76S3+2	valid
1azm	refined	Protein-Ligand	2	Ki=0.8uM	Ki	6.1	1994	human carbonic anhydrase I enzyme (HCAI)	AZM	P00915	C4H6N4O3S2	222.245	221.988	19	19	151.66	-1.23	1	2	5	3	CC(=O)Nc1nnc(s1)S(=O)(=O)N	1	C289H96N75O67Zn+6	train
1azx	general	Protein-Ligand	2.9	Kd=0.4nM	Kd	9.4	1999	antithrombin	NTP	P01008	C36H60O55S9	1661.41	1659.94	160	164	860.87	-9.69	0.36	9	31	44	CO[C@@H]1[C@@H](OC)[C@H](O[C@@H]2[C@@H](COS(=O)(=O)O)O[C@@H]([C@@H]([C@H]2OS(=O)(=O)O)OS(=O)(=O)O)O[C@@H]2[C@@H](O[C@H]([C@@H]([C@H]2OC)OS(=O)(=O)O)O[C@@H]2[C@@H](COS(=O)(=O)O)O[C@@H]([C@@H]([C@H]2OS(=O)(=O)O)OS(=O)(=O)O)OC)C(=O)O)O[C@@H]([C@H]1O[C@H]1O[C@H](COS(=O)(=O)O)[C@H]([C@@H]([C@H]1OS(=O)(=O)O)OC)OC)C(=O)O	0	C135H48N44O41S+7	train
1b05	refined	Protein-Ligand	2	Kd=75nM	Kd	7.12	1998	oligo-peptide binding protein	3-mer	P06202	C15H34N5O4S	380.527	380.233	59	58	217.22	-3.17	-2.81	5	4	16	[NH3+]CCCC[C@@H](C(=O)N[C@H](C(=O)N[C@H](C(=O)O)CCCC[NH3+])CS)[NH3+]	0	C400H145N105O120S3+7	train
1b0f	general	Protein-Ligand	3	Ki=20nM	Ki	7.7	1998	elastase	SEI	P08246	C29H39F5N4O6	634.635	634.279	83	85	128.28	3.61	3.26	3	5	15	CC([C@@H]([C@@H](C(C(F)(F)F)(F)F)O)NC(=O)[C@@H]1CCCN1C(=O)[C@H](C(C)C)NC(=O)c1ccc(cc1)C(=O)N1CCOCC1)C	0	C203H75N58O61S3+2	train
1b0h	refined	Protein-Ligand	1.9	Kd=0.20uM	Kd	6.7	1998	oligo-peptide binding protein	3-mer	P06202	C25H40N5O4	474.616	474.308	74	75	178.42	-0.25	-0.35	5	4	16	[NH3+]CCCC[C@@H](C(=O)N[C@H](C(=O)N[C@H](C(=O)O)CCCC[NH3+])Cc1cccc2c1cccc2)[NH3+]	0	C457H157N123O135S4+8	valid
1b11	general	Protein-Ligand	1.9	Ki=41nM	Ki	7.39	1998	FIV protease	3TL	P16088	C25H33N3O5	455.547	455.242	66	67	116.76	3.23	3.33	4	4	16	OC[C@@H](NC(=O)[C@H](C(C)C)NC(=O)[C@@H](NC(=O)OCc1ccccc1)C)Cc1ccccc1	0	C306H93N88O89S3+6	train
1b1h	refined	Protein-Ligand	1.8	Kd=0.093uM	Kd	7.03	1998	oligo-peptide binding protein	3-mer	P06202	C22H40N5O4	438.584	438.308	71	71	178.42	-1.15	-1.11	5	4	17	[NH3+]CCCC[C@@H](C(=O)N[C@H](C(=O)N[C@H](C(=O)O)CCCC[NH3+])CCc1ccccc1)[NH3+]	0	C459H160N124O135S4+9	valid
1b2h	refined	Protein-Ligand	1.9	Kd=29uM	Kd	4.54	1998	oligo-peptide binding protein	3-mer	P06202	C17H40N6O4	392.537	392.311	67	66	206.06	-3.69	-3.72	6	4	17	[NH3+]CCCC[C@@H](C(=O)N[C@H](C(=O)N[C@H](C(=O)O)CCCC[NH3+])CCC[NH3+])[NH3+]	0	C448H152N119O136S4+8	train
1b2i	general	Protein-Ligand	NMR	IC50=3.1uM	IC50	5.51	1999	kringle 2 (K2) domain of human plasminogen (Pgn)	AMH	P00747	C8H16NO2	158.218	158.118	27	27	64.94	-0.8	0.12	1	2	1	[NH3+]C[C@@H]1CC[C@H](CC1)C(=O)O	0	C142H39N44O32S+7	test
1b2m	general	Protein-Ligand	2	Kd=0.185mM	Kd	3.73	1999	ribonuclease t1	2-mer	P00651	C10H15N5O7P	348.229	348.071	38	40	202.56	-3.99	-2.14	4	6	6	OC[C@H]1O[C@H]([C@@H]([C@@H]1OP(O)O)O)n1cnc2c1nc(N)[nH]c2=O	0	C199H52N50O55+4	valid
1b32	refined	Protein-Ligand	1.75	Kd=79nM	Kd	7.1	1998	oligo-peptide binding protein	3-mer	P06202	C17H38N5O4S	408.58	408.264	65	64	203.72	-2.45	-1.99	5	4	17	[NH3+]CCCC[C@@H](C(=O)N[C@H](C(=O)N[C@H](C(=O)O)CCCC[NH3+])CCSC)[NH3+]	0	C431H150N115O129S4+7	valid
1b38	refined	Protein-Ligand	2	Kd=0.254uM	Kd	6.6	1998	cyclin dependent kinase 2	ATP	P24941	C10H19N5O13P3	510.205	510.019	50	52	329.38	-6.07	-2.36	3	12	9	O[C@@H]1[C@@H](COP(OP(OP(O)(O)O)(O)O)(O)O)O[C@H]([C@@H]1O)n1cnc2c1ncnc2N	1	C359H98MgN87O90+10	train
1b39	general	Protein-Ligand	2.1	Kd=0.120uM	Kd	6.92	1998	cyclin dependent kinase 2	ATP	P24941	C10H19N5O13P3	510.205	510.019	50	52	329.38	-6.07	-2.36	3	12	9	O[C@@H]1[C@@H](COP(OP(OP(O)(O)O)(O)O)(O)O)O[C@H]([C@@H]1O)n1cnc2c1ncnc2N	1	C358H97MgN85O89+11	train
1b3f	refined	Protein-Ligand	1.8	Kd=130nM	Kd	6.89	1998	oligo-peptide binding protein	3-mer	P06202	C18H36N7O4	414.523	414.283	65	65	207.1	-3.33	-2.78	6	5	16	[NH3+]CCCC[C@@H](C(=O)N[C@H](C(=O)N[C@H](C(=O)O)CCCC[NH3+])Cc1[nH]cnc1)[NH3+]	0	C431H150N116O125S4+7	train
1b3g	refined	Protein-Ligand	2	Kd=200nM	Kd	6.7	1998	oligo-peptide binding protein	3-mer	P06202	C18H40N5O4	390.541	390.308	67	66	178.42	-1.77	-1.7	5	4	16	[NH3+]CCCC[C@@H](C(=O)N[C@H](C(=O)N[C@H](C(=O)O)CCCC[NH3+])[C@H](CC)C)[NH3+]	0	C424H148N112O129S3+8	valid
1b3h	refined	Protein-Ligand	2	Kd=0.62uM	Kd	6.21	1998	oligo-peptide binding protein	3-mer	P06202	C21H44N5O4	430.605	430.339	74	74	178.42	-0.36	-0.77	5	4	16	[NH3+]CCCC[C@@H](C(=O)N[C@H](C(=O)N[C@H](C(=O)O)CCCC[NH3+])CC1CCCCC1)[NH3+]	0	C447H155N120O136S3+7	train
1b3l	refined	Protein-Ligand	2	Kd=1300nM	Kd	5.89	1998	oligo-peptide binding protein	3-mer	P06202	C14H32N5O4	334.435	334.245	55	54	178.42	-3.49	-3.11	5	4	14	[NH3+]CCCC[C@@H](C(=O)NCC(=O)N[C@H](C(=O)O)CCCC[NH3+])[NH3+]	0	C391H140N105O115S3+8	train
1b40	refined	Protein-Ligand	2.2	Kd=53nM	Kd	7.28	1999	oligo-peptide binding protein	3-mer	P06202	C21H38N5O4	424.558	424.292	68	68	178.42	-1.5	-1.5	5	4	16	[NH3+]CCCC[C@@H](C(=O)N[C@H](C(=O)N[C@H](C(=O)O)CCCC[NH3+])Cc1ccccc1)[NH3+]	0	C437H153N115O130S4+7	train
1b42	general	Protein-Ligand	2.2	Kd=97.9uM	Kd	4.01	1999	vp39	M1A	P07617	C6H8N5	150.161	150.078	19	20	71.47	-0.12	-0.05	2	2	0	C[n+]1cnc2c(c1N)nc[nH]2	0	C206H56N51O62S3+5	test
1b46	refined	Protein-Ligand	1.8	Kd=5200nM	Kd	5.28	1999	oligo-peptide binding protein	3-mer	P06202	C17H36N5O4	374.499	374.277	62	62	169.63	-2.79	-2.69	4	4	13	[NH3+]CCCC[C@@H](C(=O)O)NC(=O)[C@@H]1CCCN1C(=O)[C@H](CCCC[NH3+])[NH3+]	0	C407H146N110O122S3+9	train
1b4d	general	Protein-Ligand	2	Ki=15.6uM	Ki	4.81	1998	glycogen phosphorylase b	CRA	P00489	C9H16N2O8	280.232	280.091	35	35	171.57	-2.9	-2.91	6	6	9	OC[C@H]1O[C@](NC(=O)OC)(C(=O)N)[C@@H]([C@H]([C@@H]1O)O)O	0	C302H109N91O95S2+8	train
1b4h	refined	Protein-Ligand	1.9	Kd=3.44uM	Kd	5.46	1998	oligo-peptide binding protein	3-mer	P06202	C16H38N6O4	378.511	378.295	64	63	206.06	-4.04	-4.11	6	4	16	[NH3+]CCCC[C@@H](C(=O)N[C@H](C(=O)N[C@H](C(=O)O)CCCC[NH3+])CC[NH3+])[NH3+]	0	C410H143N109O127S3+7	train
1b4z	refined	Protein-Ligand	1.75	Kd=5900nM	Kd	5.23	1999	oligo-peptide binding protein	3-mer	P06202	C16H34N5O6	392.471	392.251	61	60	215.72	-4.8	-3.27	5	6	15	[NH3+]CCCC[C@@H](C(=O)N[C@H](C(=O)N[C@H](C(=O)O)CCCC[NH3+])CC(=O)O)[NH3+]	0	C411H142N111O121S3+7	valid
1b51	refined	Protein-Ligand	1.8	Kd=43nM	Kd	7.37	1999	oligo-peptide binding protein	3-mer	P06202	C15H34N5O5	364.461	364.256	59	58	198.65	-4.14	-3.75	6	5	16	[NH3+]CCCC[C@@H](C(=O)N[C@H](C(=O)N[C@H](C(=O)O)CCCC[NH3+])CO)[NH3+]	0	C417H148N112O123S3+8	test
1b52	refined	Protein-Ligand	2.3	Kd=76nM	Kd	7.12	1999	oligo-peptide binding protein	3-mer	P06202	C16H36N5O5	378.488	378.272	62	61	198.65	-3.71	-3.36	6	5	16	[NH3+]CCCC[C@@H](C(=O)N[C@H](C(=O)N[C@H](C(=O)O)CCCC[NH3+])[C@H](O)C)[NH3+]	0	C406H145N107O122S3+8	test
1b55	refined	Protein-Ligand	2.4	Kd=40nM	Kd	7.4	1999	tyrosine kinase btk	4IP	Q06187	C6H20O18P4	504.107	503.96	48	48	374.5	-8.74	-5.12	2	14	6	O[C@@H]1[C@H](OP(O)(O)O)[C@@H](OP(O)(O)O)[C@@H]([C@H]([C@@H]1OP(O)(O)O)O)OP(O)(O)O	0	C184H53N50O51+10	train
1b56	general	Protein-Ligand	2.05	Ki=802nM	Ki	6.1	1999	human epidermal-type fatty acid binding protein	PLM	Q01469	C16H32O2	256.424	256.24	50	49	37.3	8.56	5.55	0	2	13	CCCCCCCCCCCCCCCC(=O)O	0	C349H122N92O102S6+10	test
1b57	refined	Protein-Ligand	2	Ki=0.01uM	Ki	8	2000	Escherichia coli class II fructose-1, 6-bisphosphate aldolase	PGH	P0AB71	C2H7NO6P	172.054	172.001	17	16	132.84	-2.86	-1.45	2	5	4	ONC(=O)COP(O)(O)O	1	C246H97N75NaO83S2Zn+7	train
1b58	refined	Protein-Ligand	1.8	Kd=260nM	Kd	6.59	1999	oligo-peptide binding protein	3-mer	P06202	C21H38N5O5	440.557	440.287	69	69	198.65	-1.86	-1.79	6	5	17	[NH3+]CCCC[C@@H](C(=O)N[C@H](C(=O)N[C@H](C(=O)O)CCCC[NH3+])Cc1ccc(cc1)O)[NH3+]	0	C439H149N120O130S4+8	test
1b5g	general	Protein-Ligand	2.07	Ki=10nM	Ki	8	1998	thrombin alpha	0ZE	P09945 P00734	C29H39N7O3S	565.73	565.284	79	83	204.42	3.73	1.05	3	4	12	NC(=[NH+]CCC[C@@H]([C@@H](c1nc2c(s1)cccc2)O)NC(=O)[C@@H]1CC[C@H]2N1C(=O)[C@@](CC2)([NH3+])Cc1ccccc1)N	0	C282H93N75O84S5+7	train
1b5h	refined	Protein-Ligand	1.9	Kd=0.97uM	Kd	6.01	1998	oligo-peptide binding protein	3-mer	P06202	C15H36N6O4	364.484	364.28	61	60	206.06	-4.4	-4.5	6	4	15	[NH3+]CCCC[C@@H](C(=O)N[C@H](C(=O)N[C@H](C(=O)O)CCCC[NH3+])C[NH3+])[NH3+]	0	C398H144N105O122S3+7	train
1b5i	refined	Protein-Ligand	1.9	Kd=90nM	Kd	7.05	1999	oligo-peptide binding protein	3-mer	P06202	C16H35N6O5	391.486	391.267	62	61	221.51	-4.61	-3.17	6	5	16	[NH3+]CCCC[C@@H](C(=O)N[C@H](C(=O)N[C@H](C(=O)O)CCCC[NH3+])CC(=O)N)[NH3+]	0	C416H147N113O126S3+8	train
1b5j	refined	Protein-Ligand	1.8	Kd=37nM	Kd	7.43	1999	oligo-peptide binding protein	3-mer	P06202	C17H37N6O5	405.513	405.283	65	64	221.51	-4.26	-2.78	6	5	17	[NH3+]CCCC[C@@H](C(=O)N[C@H](C(=O)N[C@H](C(=O)O)CCCC[NH3+])CCC(=O)N)[NH3+]	0	C447H150N116O132S4+7	train
1b6h	refined	Protein-Ligand	1.8	Kd=0.015uM	Kd	7.82	1998	oligo-peptide binding protein	3-mer	P06202	C17H38N5O4	376.515	376.292	64	63	178.42	-2.21	-1.94	5	4	16	[NH3+]CCCC[C@@H](C(=O)N[C@H](C(=O)N[C@H](C(=O)O)CCCC[NH3+])CCC)[NH3+]	0	C422H147N115O128S3+8	test
1b6j	refined	Protein-Ligand	1.85	Ki=12nM	Ki	7.92	2000	HIV-1 protease	5-mer	P03369	C34H54N7O8	688.835	688.403	103	105	236.48	0.49	2.22	8	7	16	CC[C@@H]([C@@H](C(=O)N[C@H](C(=O)N)C(C)C)NC(=O)[C@@H]1CCC[N@H+]1C[C@@H]([C@H]1NC(=O)[C@H](CC(=O)N)NC(=O)CCCOc2ccc(C1)cc2)O)C	0	C326H106N87O91S2+6	train
1b6k	refined	Protein-Ligand	1.85	Ki=1.8nM	Ki	8.74	2000	HIV-1 protease	PI5	P03369	C37H54N5O7	680.854	680.402	103	106	173.91	4.18	2.02	6	6	15	CC[C@@H]([C@@H]1NC(=O)[C@@H]([NH2+]C[C@H]([C@@H](NC(=O)[C@@H](N2CCCC2=O)C(C)C)Cc2ccc(cc2)O)O)Cc2ccc(OCCCNC1=O)cc2)C	0	C353H108N95O98S2+7	valid
1b6l	refined	Protein-Ligand	1.75	Ki=5nM	Ki	8.3	2000	HIV-1 protease	PI4	P03369	C28H44N5O6	546.679	546.329	83	85	164.29	0.46	2.28	6	5	9	NC(=O)C[C@@H]1NC(=O)CCCOc2ccc(C[C@H](NC1=O)[C@@H](C[N@@H+]1CCCC[C@H]1C(=O)NC(C)(C)C)O)cc2	0	C336H109N90O94S2+6	test
1b6m	general	Protein-Ligand	1.85	Ki=4nM	Ki	8.4	2000	HIV-1 protease	PI6	P03369	C33H49N4O6	597.765	597.365	92	94	142.6	4.96	3.14	5	4	13	CC[C@@H]([C@@H]1NC(=O)[C@@H]([NH2+]C[C@H]([C@H](Cc2ccccc2)NC(=O)OC(C)(C)C)O)Cc2ccc(OCCCNC1=O)cc2)C	0	C339H106N91O94S2+7	valid
1b6p	general	Protein-Ligand	2	Ki=3nM	Ki	8.52	2000	hiv-1 protease	PI7	P03369	C36H54N5O7	668.843	668.402	102	104	182.7	4.4	2.37	7	6	17	CCC(=O)N[C@H](C(=O)N[C@H]([C@@H](C[NH2+][C@H]1Cc2ccc(cc2)OCCCNC(=O)[C@@H](NC1=O)[C@H](CC)C)O)Cc1ccc(cc1)O)C(C)C	0	C338H105N91O94S2+7	train
1b74	general	Protein-Ligand	2.3	Ki=50mM	Ki	1.3	2000	glutamate racemase	DGN	P56868	C5H11N2O3	147.152	147.077	21	20	108.03	-3.28	-1.35	2	3	3	NC(=O)CC[C@H](C(=O)O)[NH3+]	0	C240H84N58O72S3+	test
1b7h	refined	Protein-Ligand	2	Kd=0.0095uM	Kd	8.02	1998	oligo-peptide binding protein	3-mer	P06202	C18H40N5O4	390.541	390.308	67	66	178.42	-1.67	-1.55	5	4	17	[NH3+]CCCC[C@@H](C(=O)N[C@H](C(=O)N[C@H](C(=O)O)CCCC[NH3+])CCCC)[NH3+]	0	C446H154N124O138S4+9	train
1b8n	refined	Protein-Ligand	2	Ki=30pM	Ki	10.52	1999	purine nucleoside phosphorylase	IMG	P55859	C11H16N5O4	282.276	282.12	36	38	164.86	-2.88	-1.32	7	4	5	OC[C@H]1[NH2+][C@H]([C@@H]([C@@H]1O)O)c1c[nH]c2c1nc(N)[nH]c2=O	0	C232H72N63O74S3+2	test
1b8o	refined	Protein-Ligand	1.5	Ki=23pM	Ki	10.64	1999	purine nucleoside phosphorylase	IMH	P55859	C11H15N4O4	267.261	267.109	34	36	138.84	-2.3	-1.48	6	4	5	OC[C@H]1[NH2+][C@H]([C@@H]([C@@H]1O)O)c1c[nH]c2c1nc[nH]c2=O	0	C259H86N71O81S4+3	valid
1b8y	refined	Protein-Ligand	2	Ki=14nM	Ki	7.85	1999	stromelysin-1	IN7	P08254	C19H22N2O4S	374.454	374.13	48	50	95.09	3.73	3.97	1	4	5	OC(=O)CNS(=O)(=O)c1ccc(cc1)N1CCC(CC1)c1ccccc1	1	C305H98CaN79O81SZn+7	train
1b9j	refined	Protein-Ligand	1.8	Kd=1100nM	Kd	5.96	1999	oligo-peptide binding protein	3-mer	P06202	C18H40N5O4	390.541	390.308	67	66	178.42	-1.77	-1.7	5	4	16	[NH3+]CCCC[C@@H](C(=O)N[C@H](C(=O)N[C@H](C(=O)O)CCCC[NH3+])CC(C)C)[NH3+]	0	C431H151N117O131S3+8	train
1b9v	general	Protein-Ligand	2.35	IC50=224uM	IC50	3.65	1999	neuraminidase	RA2	P03474	C18H26N2O5	350.409	350.184	51	52	110.1	2.31	1.97	3	5	9	CCC(Nc1cc(ccc1N1C(=O)CCC1(CO)CO)C(=O)O)CC	1	C296H126CaN99O98S2+12	valid
1ba8	general	Protein-Ligand	1.8	Ki=1.0nM	Ki	9	1999	thrombin	0IT	P01050 P00734	C20H33N6O5S	469.578	469.223	65	66	190.2	0.88	-0.09	3	5	14	OC[C@@H](NC(=O)CN1CCC[C@@H](C1=O)NS(=O)(=O)Cc1ccccc1)CCC[NH+]=C(N)N	0	C317H103N90O93S5+7	train
1bai	refined	Protein-Ligand	2.4	Ki=20nM	Ki	7.7	1999	rous sarcoma virus protease	0Q4	P03354 P03322	C40H69N11O9	848.044	847.528	129	129	348.64	1.97	0.59	8	9	33	CCCC[C@@H](C(=O)N)NC(=O)[C@@H](NC(=O)[C@@H](NC(=O)[C@@H](NC(=O)[C@@H](NC(=O)[C@H](C(C)C)NC(=O)[C@H](CCC[NH+]=C(N)N)[NH3+])CC(C)C)Cc1ccccc1)CCC(=O)O)C	0	C364H116N106O108S+9	train
1bap	general	Protein-Ligand	1.75	Kd=0.14uM	Kd	6.85	1992	apolipoprotein	ARA/ARB	P02924	C5H10O5	150.13	150.053	20	20	90.15	-2.52	-2.58	4	4	4	O[C@H]1CO[C@@H]([C@@H]([C@H]1O)O)O	0	C229H97N64O77S4+4	train
1bb0	general	Protein-Ligand	2.1	Ki=4.4nM	Ki	8.36	1999	thrombin	0IV	P01050 P00734	C23H37N6O5S	509.642	509.255	72	74	179.24	1.11	1.82	3	5	12	OC[C@@H](NC(=O)CN1CCC[C@@H](C1=O)NS(=O)(=O)Cc1ccccc1)C[C@H]1CCC[N+](=C(N)N)C1	0	C329H108N89O95S6+8	train
1bcd	refined	Protein-Ligand	1.9	Ki=2nM	Ki	8.7	1993	carbonic anhydrase ii	FMS	P00918	CH2F3NO2S	149.092	148.976	10	9	68.54	0.14	1.58	1	2	0	FC(S(=O)(=O)N)(F)F	1	C244H87N64O55SZn+5	train
1bcj	general	Protein-Ligand	2.1	Kd=0.20mM	Kd	3.7	1998	mannose-binding protein-a	NGA	P19999	C8H15NO6	221.208	221.09	30	30	119.25	-2.59	-2.69	5	5	7	OC[C@H]1O[C@@H](O)[C@@H]([C@H]([C@H]1O)O)NC(=O)C	1	C158H58CaN45O46S+4	valid
1bcu	refined	Protein-Ligand	2	Kd=0.53mM	Kd	3.28	1998	thrombin alpha	PRL	P01050 P00734	C13H11N3	209.247	209.095	27	29	64.93	2.17	3.71	2	1	0	Nc1ccc2c(c1)nc1c(c2)ccc(c1)N	0	C243H88N61O71S5+5	test
1bdl	general	Protein-Ligand	2.8	Ki=1.41uM	Ki	5.85	1998	hiv-1 protease	IM1	P04587	C31H42N4O4	534.69	534.321	81	83	116.34	4.96	5.75	4	4	17	O=C(OC(C)(C)C)N[C@H]([C@H](C[C@H](C(=O)N[C@H](c1ncc[nH]1)C(C)C)Cc1ccccc1)O)Cc1ccccc1	0	C277H98N75O81S+4	train
1bdq	refined	Protein-Ligand	2.5	Ki=0.46uM	Ki	6.34	1998	HIV-1 protease	IM1	P04587	C31H42N4O4	534.69	534.321	81	83	116.34	4.96	5.75	4	4	17	O=C(OC(C)(C)C)N[C@H]([C@H](C[C@H](C(=O)N[C@H](c1ncc[nH]1)C(C)C)Cc1ccccc1)O)Cc1ccccc1	0	C335H109N90O95S2+6	train
1bdr	general	Protein-Ligand	2.8	Ki=0.21uM	Ki	6.68	1998	hiv-1 protease	IM1	P04587	C31H42N4O4	534.69	534.321	81	83	116.34	4.96	5.75	4	4	17	O=C(OC(C)(C)C)N[C@H]([C@H](C[C@H](C(=O)N[C@H](c1ncc[nH]1)C(C)C)Cc1ccccc1)O)Cc1ccccc1	0	C337H105N91O95S2+6	train
1bgo	general	Protein-Ligand	2.3	Ki=3.5nM	Ki	8.46	1999	cathepsin k	I10	P43235	C26H31N3O4S	481.607	481.204	65	67	116.77	3.79	5.2	3	5	13	O[C@@H](CNS(=O)(=O)c1ccccn1)CNC(=O)[C@@H](c1cccc(c1)c1ccccc1)CC(C)C	0	C222H66N63O78S4	train
1bgq	refined	Protein-Ligand	2.5	Kd=2.7nM	Kd	8.57	1999	heat shock protein 90	RDC	P02829	C18H17ClO6	364.777	364.071	42	44	96.36	3.36	2.69	2	4	2	C[C@@H]1C[C@H]2O[C@@H]2/C=C\C=C\C(=O)Cc2c(C(=O)O1)c(O)cc(c2Cl)O	0	C294H102N71O80S+5	valid
1bhf	refined	Protein-Ligand	1.8	Kd=42uM	Kd	4.38	1998	tyrosine kinase p56lck	5-mer	P06239	C29H40N4O12	636.647	636.264	85	85	265.6	5.34	1.24	4	12	20	CC[C@@H]([C@@H](C(=O)O)NC(=O)[C@@H](NC(=O)[C@@H](NC(=O)[C@H](Cc1ccc(cc1)CC(=O)O)NC(=O)C)CCC(=O)O)CCC(=O)O)C	0	C174H66N51O59S+6	train
1bhx	refined	Protein-Ligand	2.3	Ki=0.145uM	Ki	6.84	1998	thrombin alpha	R56	P00734	C19H29N6O4S2	469.601	469.169	60	62	195.27	1.76	0.6	2	4	10	O=C([C@@H]1CS[C@@H]2N1C(=O)[C@@H](CC2)NS(=O)(=O)Cc1ccccc1)NCCC[NH+]=C(N)N	0	C326H107N88O95S6+8	train
1bim	general	Protein-Ligand	2.8	IC50=1.2nM	IC50	8.92	1996	renin	0QB	P00797	C33H49N5O4S	611.838	611.351	92	95	157.1	4.82	5.48	3	5	15	O=C([C@H](Cc1csc(n1)N)CC(=O)N([C@H](c1ccccc1)C)C)N[C@H]([C@H]([C@@H]1CC(N(C1=O)C)(C)C)O)CC1CCCCC1	0	C427H123N96O118S5+3	test
1bio	general	Protein-Ligand	1.5	IC50=2.9uM	IC50	5.54	1999	complement factor d	SOA	P00746	C7H9NO	123.152	123.068	18	18	46.25	0.91	1.34	2	1	2	OCc1ccccc1N	0	C149H59N47O48S3+3	train
1biw	general	Protein-Ligand	2.5	IC50=104nM	IC50	6.98	1999	stromelysin-1	S80	P08254	C20H37N3O6	415.524	415.268	66	66	128.2	0.28	1.41	4	5	16	COCCN1CCCC[C@@H](C1=O)NC(=O)[C@@H]([C@@H](C(=O)NO)CCCO)CC(C)C	1	C250H74CaN60O61SZn+5	train
1bji	general	Protein-Ligand	2	IC50=2nM	IC50	8.7	1998	neuraminidase	DPC	P03472	C20H28N3O5	390.453	390.203	56	57	123.58	0.12	0.34	2	4	9	CCCN(C(=O)[C@@H]1OC(=C[C@@H]([C@H]1NC(=O)C)[NH3+])C(=O)O)CCc1ccccc1	1	C289H121CaN101O99S2+9	train
1bjr	general	Protein-Ligand	2.44	Ki=21nM	Ki	7.68	1998	proteinase k	10-mer	P06873	C34H60N11O11	798.907	798.447	116	115	349.7	-3.14	-1.68	11	11	34	O=C[C@@H](NC(=O)[C@@H](NC(=O)CNC(=O)[C@@H](NC(=O)[C@@H](NC(=O)CNC(=O)CNC(=O)[C@@H](NC(=O)[C@@H](NC(=O)[C@H](C(C)C)[NH3+])C)CCC(=O)N)C)C)CC(C)C)C	0	C293H96N79O103S2+3	train
1bju	refined	Protein-Ligand	1.8	Ki=16uM	Ki	4.8	1998	BETA-TRYPSIN	GP6	P00760	C14H14ClN4O	289.74	289.086	34	35	92.74	3.9	2.29	2	1	5	O=C(Nc1ccc(cc1)Cl)Nc1ccc(cc1)C(=[NH2+])N	0	C249H86N64O74S5+4	valid
1bjv	refined	Protein-Ligand	1.8	Ki=2.9uM	Ki	5.54	1998	BETA-TRYPSIN	GP8	P00760	C20H19N4O2	347.39	347.151	45	47	101.97	4.8	3.43	2	1	7	O=C(Nc1ccc(cc1)C(=[NH2+])N)Nc1ccc(cc1)Oc1ccccc1	0	C279H99N73O83S5+4	train
1bkj	general	Protein-Ligand	1.8	Kd=0.17uM	Kd	6.77	1999	nadph-flavin oxidoreductase	FMN	Q56691	C17H22N4O9P	457.352	457.112	53	55	224.84	-2.56	-2	4	8	9	O=c1[nH]c(=O)c2c(n1)n(C[C@@H]([C@@H]([C@@H](COP(O)(O)O)O)O)O)c1c(n2)cc(c(c1)C)C	0	C367H120N97O100S4+7	valid
1bkm	general	Protein-Ligand	2	IC50=1.8uM	IC50	5.74	1997	pp60 v-src tyrosine kinase transforming protein	1C5	P00524	C26H40N4O10P	599.59	599.248	81	82	251.2	2.16	2.32	4	9	17	OC(=O)CC[C@@H](C(=O)N[C@@H](C(=O)N)CCC1CCCCC1)NC(=O)[C@H](Cc1ccc(cc1)OP(O)(O)O)NC(=O)C	0	C199H73N56O62S2+7	train
1bky	general	Protein-Ligand	2	Kd=144uM	Kd	3.84	1999	vp39	1MC	P07617	C5H7N3O	125.129	125.059	16	16	60.91	-1.12	-0.06	1	1	0	Cn1ccc(nc1=O)N	0	C169H53N39O57S2+2	train
1bl4	general	Protein-Ligand	1.9	IC50=1.8nM	IC50	8.74	1998	fk506 binding protein (fkbp)	AP1	P62942	C38H47NO11	693.78	693.315	97	100	139.29	7.2	5.92	0	4	18	CC[C@H](C(=O)N1CCCC[C@H]1C(=O)O[C@@H](c1cccc(c1)OCC(=O)O)CCc1ccc(c(c1)OC)OC)c1cc(OC)c(c(c1)OC)OC	0	C312H95N81O85S+10	train
1bl6	general	Protein-Ligand	2.5	IC50=0.16uM	IC50	6.8	1999	p38 map kinase	SB6	Q16539	C18H16FN3	293.338	293.133	38	41	30.71	3.05	4.16	0	2	4	Fc1ccc(cc1)c1ncn(c1c1ccncc1)CC1CC1	0	C294H90N80O78S2+7	train
1bl7	general	Protein-Ligand	2.5	IC50=0.019uM	IC50	7.72	1999	p38 map kinase	SB4	Q16539	C18H20FN6	339.39	339.173	45	48	86.23	1.43	3.78	2	3	3	Nc1nccc(n1)c1n(cnc1c1ccc(cc1)F)C1CC[NH2+]CC1	0	C273H82N70O71S2+6	valid
1bm2	general	Protein-Ligand	2.1	IC50=0.11uM	IC50	6.96	1998	growth factor receptor bound protein 2	7-mer	P62993	C35H57N8O12PS	844.912	844.355	114	115	362.42	-4.25	-0.35	7	11	28	O=C[C@@H](NC(=O)C)CSCCNC(=O)[C@@H]1CCCN1C(=O)[C@H](C(C)C)NC(=O)[C@@H](NC(=O)[C@H](C(C)C)NC(=O)[C@H](Cc1ccc(cc1)OP(O)(O)O)[NH3+])CC(=O)N	0	C208H60N57O53+6	train
1bm6	general	Protein-Ligand	NMR	Ki=13nM	Ki	7.89	1999	stromelysin-1	3-mer	P08254	C18H23N3O5S	393.457	393.136	50	51	117.21	1.69	3.28	2	5	10	ONC(=O)[C@H](N(S(=O)(=O)c1ccc(cc1)OC)Cc1cccnc1)C(C)C	1	C186H68CaN49O48SZn+6	test
1bm7	refined	Protein-Ligand	2	Kd=30nM	Kd	7.52	1998	transthyretin	FLF	P02766	C14H10F3NO2	281.23	281.066	30	31	49.33	5.51	4.22	1	2	2	OC(=O)c1ccccc1Nc1cccc(c1)C(F)(F)F	0	C281H103N61O88S2+2	test
1bma	refined	Protein-Ligand	1.8	Ki=26uM	Ki	4.59	1995	elastase	0QH	P00772	C27H36F3N4O3	521.595	521.274	73	74	87.3	5.5	5.37	3	3	14	CC(C[C@@H](C(=O)N[N@+](Cc1ccccc1)(CC(=O)Nc1ccc(cc1)C(C)C)C)NC(=O)C(F)(F)F)C	0	C247H88N74O78S4+3	train
1bmb	general	Protein-Ligand	1.8	IC50=0.7uM	IC50	6.15	1998	growth factor receptor bound protein 2	9-mer	P62993	C57H83N11O17P	1225.31	1224.57	169	172	480.49	-2.07	0.67	10	16	40	[NH3+]CCCC[C@@H](C(=O)N1CCC[C@H]1C(=O)N[C@H](C(=O)N[C@H](C(=O)N[C@H](C(=O)N[C@H](C(=O)N[C@H](C(=O)N[C@H](C(=O)N[C@H](C(=O)O)Cc1ccccc1)CCC(=O)O)C(C)C)CC(=O)N)C(C)C)Cc1ccc(cc1)OP(O)(O)O)Cc1ccccc1)[NH3+]	0	C208H60N59O59+5	test
1bmk	general	Protein-Ligand	2.4	IC50=0.025uM	IC50	7.6	1999	p38 map kinase	SB5	Q16539	C17H16FN5	309.341	309.139	39	42	69.62	2.09	3.72	1	3	4	Fc1ccc(cc1)c1ncn(c1c1ccnc(n1)N)CC1CC1	0	C275H81N73O72S2+6	valid
1bmm	general	Protein-Ligand	2.6	Ki=79nM	Ki	7.1	1996	thrombin alpha	BM2	P28507 P00734	C23H33N6O5S	505.61	505.223	68	70	190.2	1.73	0.92	3	5	14	OC[C@@H](C(=O)N1CCC[C@H]1CNC(=O)CCC[NH+]=C(N)N)NS(=O)(=O)c1ccc2c(c1)cccc2	0	C285H99N79O86S4+8	test
1bmn	general	Protein-Ligand	2.8	Ki=3.6nM	Ki	8.44	1996	thrombin alpha	BM9	P28507 P00734	C25H35N6O5S	531.648	531.239	72	75	179.24	1.75	2.44	3	5	11	OC[C@@H](C(=O)N1CCC[C@H]1CNC(=O)[C@H]1CCC[N+](=C(N)N)C1)NS(=O)(=O)c1ccc2c(c1)cccc2	0	C323H100N91O93S5+8	valid
1bmq	general	Protein-Ligand	2.5	IC50=38nM	IC50	7.42	1998	interleukin-1 beta convertase	MNO	P29466	C26H34N4O7S	546.636	546.215	72	74	170.36	1.41	2.72	4	7	15	OC[C@@H](NC(=O)[C@@H]1CCCN1C(=O)[C@H](C(C)C)NC(=O)c1ccc2c(c1)cccc2)CC(=O)NS(=O)(=O)C	0	C237H77N76O70S4+6	train
1bn1	refined	Protein-Ligand	2.1	Kd=0.46nM	Kd	9.34	1999	carbonic anhydrase ii	AL5	P00918	C12H14N2O4S3	346.446	346.012	35	36	151.33	1.66	4.44	2	4	5	Cc1ccc(cc1)CNS(=O)(=O)c1ccc(s1)S(=O)(=O)N	1	C331H102N83O75Zn+5	train
1bn3	refined	Protein-Ligand	2.2	Kd=0.13nM	Kd	9.89	1999	carbonic anhydrase ii	AL6	P00918	C13H12N2O5S3	372.44	371.991	35	37	151.77	1.65	4.51	1	4	3	COc1cccc(c1)N1C=Cc2c(S1(=O)=O)sc(c2)S(=O)(=O)N	1	C301H93N78O71SZn+5	train
1bn4	refined	Protein-Ligand	2.1	Kd=0.49nM	Kd	9.31	1999	carbonic anhydrase ii	AL9	P00918	C12H14N2O5S3	362.445	362.006	36	37	160.56	1.26	4.14	2	4	6	COc1ccc(cc1)CNS(=O)(=O)c1ccc(s1)S(=O)(=O)N	1	C333H102N86O76Zn+6	train
1bnm	general	Protein-Ligand	2.6	Kd=0.10nM	Kd	10	1999	carbonic anhydrase	AL8	P00918	C14H18N3O5S3	404.505	404.041	43	45	168.38	0.69	2.77	2	4	4	C[NH2+][C@H]1CN(c2cccc(c2)OC)S(=O)(=O)c2c1cc(s2)S(=O)(=O)N	1	C350H104N92O82SZn+7	test
1bnn	refined	Protein-Ligand	2.3	Kd=0.10nM	Kd	10	1999	carbonic anhydrase ii	AL1	P00918	C13H14N2O5S3	374.456	374.006	37	39	151.77	1.55	4.08	1	4	3	COc1cccc(c1)N1CCc2c(S1(=O)=O)sc(c2)S(=O)(=O)N	1	C301H96HgN77O73SZn+4	train
1bnq	refined	Protein-Ligand	2.4	Kd=0.32nM	Kd	9.49	1999	carbonic anhydrase ii	AL4	P00918	C11H20N3O5S3	370.489	370.057	42	43	168.38	-0.62	1.47	2	4	6	COCCN1C[C@H]([NH2+]CC)c2c(S1(=O)=O)sc(c2)S(=O)(=O)N	1	C359H104N89O77S2Zn+6	train
1bnt	refined	Protein-Ligand	2.15	Kd=0.16nM	Kd	9.8	1999	carbonic anhydrase ii	AL2	P00918	C13H14N2O6S3	390.455	390.001	38	40	172	0.43	3.57	2	5	4	COc1ccc(cc1)N1C[C@H](O)c2c(S1(=O)=O)sc(c2)S(=O)(=O)N	1	C349H102N88O77S2Zn+6	test
1bnu	refined	Protein-Ligand	2.15	Kd=0.20nM	Kd	9.7	1999	carbonic anhydrase ii	AL3	P00918	C11H12N2O5S4	380.483	379.963	34	36	191.01	0.12	3.49	2	5	4	O[C@H]1CN(Cc2cccs2)S(=O)(=O)c2c1cc(s2)S(=O)(=O)N	1	C312H94N80O70SZn+6	train
1bnv	refined	Protein-Ligand	2.4	Kd=1.70nM	Kd	8.77	1999	carbonic anhydrase ii	AL7	P00918	C14H18N3O5S3	404.505	404.041	43	45	168.38	0.69	2.77	2	4	4	C[NH2+][C@@H]1CN(c2cccc(c2)OC)S(=O)(=O)c2c1cc(s2)S(=O)(=O)N	1	C335H104N84O71S2Zn+7	train
1bnw	refined	Protein-Ligand	2.25	Kd=0.83nM	Kd	9.08	1999	carbonic anhydrase ii	TPD	P00918	C9H10N2O4S4	338.447	337.952	29	30	179.57	1.01	4.19	2	4	5	O=S(=O)(c1ccc(s1)S(=O)(=O)N)NCc1cccs1	1	C296H93HgN76O70SZn+5	train
1bp0	refined	Protein-Ligand	2.4	Kd=4.0uM	Kd	5.4	1998	thymidylate synthase	UMP	P00469	C9H14N2O8P	309.19	309.049	34	35	167.83	-3.14	-2.14	2	6	4	O[C@H]1C[C@@H](O[C@@H]1COP(O)(O)O)n1ccc(=O)[nH]c1=O	0	C291H104N71O67S+5	train
1bq3	general	Protein-Ligand	2.7	Ki=4uM	Ki	5.4	1998	phosphoglycerate mutase 1	IHP	P00950	C6H24O24P6	666.083	665.908	60	60	501.06	-11.25	-5.76	0	18	6	OP(O[C@@H]1[C@H](OP(O)(O)O)[C@H](OP(O)(O)O)[C@@H]([C@@H]([C@H]1OP(O)(O)O)OP(O)(O)O)OP(O)(O)O)(O)O	0	C283H95N94O76+12	train
1bq4	refined	Protein-Ligand	2.5	Ki=6uM	Ki	5.22	1998	phosphoglycerate mutase 1	BHC	P00950	C12H6O12	342.169	341.986	30	30	223.8	5.58	-0.12	0	12	0	OC(=O)c1c(C(=O)O)c(C(=O)O)c(c(c1C(=O)O)C(=O)O)C(=O)O	0	C291H93N92O76+12	train
1bqo	general	Protein-Ligand	2.3	IC50=18.4nM	IC50	7.74	1999	stromelysin-1	N25	P08254	C21H27N3O8S2	513.584	513.124	61	63	159.31	1.81	3.69	2	6	9	ONC(=O)C1N(CC(CN1S(=O)(=O)c1ccc(cc1)OC)(C)C)S(=O)(=O)c1ccc(cc1)OC	1	C315H94CaN77O77SZn+5	train
1br6	refined	Protein-Ligand	2.3	Ki=0.6mM	Ki	3.22	1998	ricin	PT1	P02879	C14H12N6O3	312.283	312.097	35	37	146.88	0.77	1.26	3	5	3	OC(=O)c1ccc(cc1)NCc1cnc2c(n1)c(=O)[nH]c(n2)N	0	C262H89N78O75S+8	train
1bra	general	Protein-Ligand	2.2	Ki=15000uM	Ki	1.82	1994	trypsin beta D189G G226D	BEN	P00763	C7H9N2	121.16	121.077	18	18	51.61	2.71	-0.15	0	0	1	NC(=[NH2+])c1ccccc1	0	C217H80N56O67S4+2	train
1bsk	general	Protein-Ligand	3	Ki=76uM	Ki	4.12	2000	peptide deformylase	MLN	P0A6K3	C18H29N3O8P	446.412	446.169	59	59	187.53	1.91	3.28	2	7	12	CCCC[C@@H](C(=O)N[C@H](C(=O)Nc1ccc(cc1)N(=O)=O)CC(C)C)OP(O)(O)O	1	C273H98N74O79S5Zn+6	train
1btn	general	Protein-Ligand	2	Kd=40uM	Kd	4.4	1996	beta-spectrin	I3P	Q62261	C6H18O15P3	423.119	422.986	42	42	311.22	-7.48	-4.8	3	12	6	O[C@@H]1[C@@H](OP(O)(O)O)[C@H](OP(O)(O)O)[C@H]([C@@H]([C@@H]1O)OP(O)(O)O)O	0	C160H44N43O37+8	train
1bty	refined	Protein-Ligand	1.5	Ki=18.4uM	Ki	4.74	1995	bovine trypsin	BEN	P00760	C7H9N2	121.16	121.077	18	18	51.61	2.71	-0.15	0	0	1	NC(=[NH2+])c1ccccc1	0	C187H72N51O60S5+3	train
1bug	general	Protein-Ligand	2.7	IC50=43uM	IC50	4.37	1999	catechol oxidase	URS	Q9ZP19	C7H8N2S	152.217	152.041	18	18	70.14	1.13	2.12	2	0	2	NC(=S)Nc1ccccc1	1	C210H76Cu2N64O54S2+8	test
1bux	general	Protein-Ligand	2.8	Kd=14uM	Kd	4.85	1999	nucleoside diphosphate kinase	PPS	P22887	C10H17N5O13P2S	509.28	509.002	48	50	317.85	-5.27	-1.13	3	12	9	O[C@@H]1[C@H](OP(O)(O)O)[C@H](O[C@H]1n1cnc2c1ncnc2N)COP(OS(=O)(=O)O)(O)O	0	C220H80N64O62+8	test
1bv7	refined	Protein-Ligand	2	Ki=0.05nM	Ki	10.3	1998	HIV-1 protease	XV6	P04585	C41H38N6O5S2	758.908	758.235	92	98	204.47	5.7	6.51	4	7	16	O[C@@H]1[C@@H](O)[C@@H](Cc2ccccc2)N(C(=O)N([C@@H]1Cc1ccccc1)Cc1cccc(c1)C(=O)Nc1nccs1)Cc1cccc(c1)C(=O)Nc1nccs1	0	C358H118N94O99S2+6	valid
1bv9	refined	Protein-Ligand	2	Ki=0.11nM	Ki	9.96	1998	HIV-1 protease	XV6	P04585	C41H38N6O5S2	758.908	758.235	92	98	204.47	5.7	6.51	4	7	16	O[C@@H]1[C@@H](O)[C@@H](Cc2ccccc2)N(C(=O)N([C@@H]1Cc1ccccc1)Cc1cccc(c1)C(=O)Nc1nccs1)Cc1cccc(c1)C(=O)Nc1nccs1	0	C336H108N90O94S2+6	valid
1bwa	refined	Protein-Ligand	1.9	Ki=2.5nM	Ki	8.6	1998	HIV-1 protease	XV6	P04585	C41H38N6O5S2	758.908	758.235	92	98	204.47	5.7	6.51	4	7	16	O[C@@H]1[C@@H](O)[C@@H](Cc2ccccc2)N(C(=O)N([C@@H]1Cc1ccccc1)Cc1cccc(c1)C(=O)Nc1nccs1)Cc1cccc(c1)C(=O)Nc1nccs1	0	C355H109N92O98S2+6	test
1bwn	general	Protein-Ligand	2.1	Kd=87nM	Kd	7.06	1999	bruton's tyrosine kinase	4IP	Q06187	C6H20O18P4	504.107	503.96	48	48	374.5	-8.74	-5.12	2	14	6	O[C@@H]1[C@H](OP(O)(O)O)[C@@H](OP(O)(O)O)[C@@H]([C@H]([C@@H]1OP(O)(O)O)O)OP(O)(O)O	0	C189H47N51O48+11	train
1bxo	refined	Protein-Ligand	0.95	Ki=0.10nM	Ki	10	1998	penicillopepsin	PP7	P00798	C30H48N4O9P	639.697	639.316	92	93	205.98	2.11	3.15	4	7	12	COC(=O)[C@@H]1Cc2cccc(c2)CNC(=O)C[C@@H](C(=O)N[C@H](P(O1)(O)O)CC(C)C)NC(=O)[C@H](C(C)C)NC(=O)CC(C)C	0	C392H129N96O132+	valid
1bxq	refined	Protein-Ligand	1.41	Ki=42nM	Ki	7.38	1998	penicillopepsin	PP8	P00798	C29H48N4O9P	627.687	627.316	91	91	219.97	2.14	3.44	4	7	22	COC(=O)[C@@H](OP([C@@H](NC(=O)[C@@H](NC(=O)[C@H](C(C)C)NC(=O)CC(C)C)CC(=O)N)CC(C)C)(O)O)Cc1ccccc1	0	C334H125N88O127S+	valid
1bxr	refined	Protein-Ligand	2.1	Ki=0.4mM	Ki	3.4	1999	carbamoyl-phosphate synthase	ANP	P00968 P0A6F1	C10H20N6O12P3	509.22	509.035	51	53	332.18	-6.35	-2.4	4	12	9	O[C@@H]1[C@@H](COP(OP(NP(O)(O)O)(O)O)(O)O)O[C@H]([C@@H]1O)n1cnc2c1ncnc2N	1	C424H147MnN116O135S6+7	train
1bzc	refined	Protein-Ligand	2.35	Ki=12uM	Ki	4.92	1999	tyrosine phosphatase 1b	TPI	P18031	C17H18F2N2O7P	431.305	431.082	47	48	183.77	1.28	2.17	2	7	7	OC(=O)CC[C@@H](C(=O)N)NC(=O)c1ccc2c(c1)ccc(c2)C(P(O)(O)O)(F)F	0	C216H68N70O63S2+9	train
1bzf	general	Protein-Ligand	NMR	Kd=5nM	Kd	8.3	1999	dihydrofolate reductase	TMQ	P00381	C19H23N5O3	369.418	369.18	50	52	117.54	2.6	3.98	3	2	6	COc1cc(NCc2ccc3c(c2C)c(N)nc(n3)N)cc(c1OC)OC	0	C339H95N87O85S2+9	valid
1bzh	general	Protein-Ligand	2.1	Ki=0.17uM	Ki	6.77	1999	tyrosine phosphatase 1b	7-mer	P18031	C39H51FN8O19S	986.928	986.298	119	120	467.82	3.84	-1.05	8	18	11	OC(=O)CC[C@@H]1NC(=O)[C@H](CC(=O)O)NC(=O)[C@H](C)NC(=O)[C@@H](NC(=O)CSC[C@@H](NC(=O)[C@@H](NC(=O)[C@@H](NC1=O)Cc1ccc(cc1)OC(C(=O)O)(C(=O)O)F)CC(C)C)C(=O)N)CC(=O)O	0	C236H78N78O70S3+10	train
1bzj	refined	Protein-Ligand	2.25	Ki=22uM	Ki	4.66	1999	tyrosine phosphatase 1b	PIC	P18031	C12H10F2O5P	303.175	303.023	30	31	111.58	2.33	2.33	0	5	1	OC(=O)c1ccc2c(c1)ccc(c2)C(P(O)(O)O)(F)F	0	C234H76N75O66S3+10	train
1bzs	general	Protein-Ligand	1.7	IC50=10nM	IC50	8	2000	neutrophil collagenase (mmp8)	BSI	P22894	C22H19NO4S	393.456	393.103	47	50	83.06	4.74	4.57	0	4	3	OC(=O)[C@H]1Cc2ccccc2CN1S(=O)(=O)c1ccc(cc1)c1ccccc1	1	C284H90CaN70O76SZn+5	valid
1bzy	refined	Protein-Ligand	2	Kd=4.6nM	Kd	8.34	1999	hypoxanthine-guanine phosphoribosyltransferase	IMU	P00492	C11H18N5O7P	363.264	363.094	42	44	228.14	-6.97	-1.64	6	6	5	O[C@H]1[C@@H]([NH2+][C@@H]([C@H]1O)COP(O)(O)O)c1c[nH]c2c1nc(N)[nH]c2=O	1	C331H104Mg2N83O96S3+9	train
1c12	general	Protein-Ligand	2.6	Kd=1.9nM	Kd	8.72	1999	antibody fab fragment	TRZ	P01869 P01837	C20H28O3	316.435	316.204	51	52	54.37	5.93	4.71	0	3	4	OC(=O)CCC(=O)c1cc2[C@@H](C(C)C)[C@@H](C(c2cc1C)(C)C)C	0	C361H93N81O84S3+5	test
1c1r	refined	Protein-Ligand	1.37	Ki=0.0235uM	Ki	7.63	2000	trypsin beta	BAI	P00760	C16H15N6	291.331	291.136	37	40	108.97	3.83	1.19	2	2	3	NC(=[NH2+])c1ccc2c(c1)[nH]c(n2)Cc1nc2c([nH]1)cccc2	1	C262H95N66O76S5Zn+5	train
1c1u	refined	Protein-Ligand	1.75	Ki=0.0056uM	Ki	8.25	2000	thrombin alpha	BAI	P28504 P00734	C16H15N6	291.331	291.136	37	40	108.97	3.83	1.19	2	2	3	NC(=[NH2+])c1ccc2c(c1)[nH]c(n2)Cc1nc2c([nH]1)cccc2	1	C264H94N68O77S5Zn+6	train
1c1v	refined	Protein-Ligand	1.98	Ki=0.023uM	Ki	7.64	2000	thrombin alpha	BAB	P28504 P00734	C17H18N8	334.378	334.165	43	46	160.58	4.62	-0.64	2	2	4	NC(=[NH2+])c1ccc2c(c1)[nH]c(n2)Cc1nc2c([nH]1)cc(cc2)C(=[NH2+])N	1	C279H103N70O80S5Zn2+6	train
1c29	general	Protein-Ligand	2.3	IC50=472nM	IC50	6.33	2000	tryptophan synthase	HE1	P00929 P0A2K1	C10H14O4PS	261.255	261.035	30	30	119.81	0.71	2.13	1	4	5	Oc1ccccc1SCC/C=C/P(O)(O)O	0	C347H114N87O97S2+4	train
1c2t	general	Protein-Ligand	2.1	Ki=260nM	Ki	6.59	2000	glycinamide ribonucleotide transformylase	NHS	P08179	C23H22N4O8	482.443	482.144	57	59	212.77	3.86	1.94	3	8	8	OC(=O)CC[C@@H](C(=O)O)NC(=O)c1ccc(cc1)[C@@H](C(=O)O)Cc1ccc2c(c1)c(=O)[nH]c(n2)N	0	C315H103N88O94S+5	valid
1c3b	general	Protein-Ligand	2.25	Ki=27nM	Ki	7.57	1999	cephalosporinase	BZB	P00811	C8H7BO2S	178.016	178.026	19	20	68.7	1.88	0.58	2	2	3	OB(c1cc2c(s1)cccc2)O	0	C191H69N57O58+6	valid
1c3e	general	Protein-Ligand	2.1	Ki=260nM	Ki	6.59	1999	glycinamide ribonucleotide transformylase	NHR	P08179	C23H22N4O8	482.443	482.144	57	59	212.77	3.86	1.94	3	8	8	OC(=O)CC[C@@H](C(=O)O)NC(=O)c1ccc(cc1)[C@H](C(=O)O)Cc1ccc2c(c1)c(=O)[nH]c(n2)N	0	C266H90N69O76S+5	train
1c3i	general	Protein-Ligand	1.83	IC50=1.6uM	IC50	5.8	2000	stromelysin-1	TR1	P08254	C24H32N3O4S	458.594	458.211	64	65	139.91	3.22	1.93	3	3	15	SC[C@@H](C(=O)NCC(=O)N[C@H](C(=O)OC)C(C)C)[NH2+]Cc1ccc(cc1)c1ccccc1	1	C361H117CaN91O100SZn2+8	valid
1c3r	general	Protein-Ligand	2	IC50=0.4uM	IC50	6.4	1999	histone deacetylase-like protein (hdlp)	TSN	O67135	C17H22N2O3	302.368	302.163	44	44	69.64	2.75	2.97	2	3	8	ONC(=O)/C=C/C(=C/[C@H](C(=O)c1ccc(cc1)N(C)C)C)/C	1	C312H99N79O88S3Zn+4	train
1c3x	refined	Protein-Ligand	2.4	Ki=210uM	Ki	3.68	1999	pentosyltransferase	8IG	P81989	C5H4IN5O	277.023	276.946	16	17	100.45	-0.39	0.41	3	2	0	Ic1[nH]c2c(n1)c(=O)[nH]c(n2)N	0	C227H79N57O65S2+3	train
1c4u	refined	Protein-Ligand	2.1	Ki=0.043nM	Ki	10.37	2000	thrombin alpha	IH1	P28504 P00734	C23H30BrN6O5S	582.49	581.118	66	69	172.16	3.27	1.37	1	5	9	O=C([C@@H]1C=CCn2n1c(=O)n(c2=O)CCS(=O)(=O)c1ccc(cc1)Br)NC[C@@H]1CC[C@H](CC1)C(=[NH2+])N	0	C330H111N89O96S6+8	train
1c4v	general	Protein-Ligand	2.1	Ki=0.016nM	Ki	10.8	2000	thrombin alpha	IH2	P00734	C30H37N6O3	529.653	529.293	76	80	129.64	4.97	2.27	1	3	9	O=C([C@@H]1C=C(C)Cn2n1c(=O)n(c2=O)CC(c1ccccc1)c1ccccc1)NC[C@@H]1CC[C@H](CC1)C(=[NH2+])N	0	C319H103N87O96S6+9	train
1c4y	general	Protein-Ligand	2.7	Ki=12nM	Ki	7.92	2000	thrombin short chain	IH3	P00734	C31H35N7O3	553.655	553.28	76	81	132.73	3.44	4.26	3	4	8	CC1=C[C@@H](C(=O)N[C@@H]2CC[C@H](CC2)c2cnc([nH]2)N)n2n(C1)c(=O)n(c2=O)CC(c1ccccc1)c1ccccc1	0	C326H109N87O94S6+9	test
1c50	general	Protein-Ligand	2.3	IC50=334nM	IC50	6.48	1999	glycogen phosphorylase	CHI	P00489	C23H23ClFN3O3	443.898	443.141	54	57	85.43	3.78	3.61	3	3	8	O[C@@H]1CCN(CC1)C(=O)[C@@H](NC(=O)c1cc2c([nH]1)ccc(c2)Cl)Cc1ccc(cc1)F	0	C382H121N108O91S+15	test
1c5c	refined	Protein-Ligand	1.61	Kd=110nM	Kd	6.96	2000	chimeric decarboxylase antibody 21d8	TK4		C12H15NO7S2	349.38	349.029	37	38	201.08	0.56	4.04	1	7	2	CC(=O)Nc1ccc2c(c1S(O)(O)O)cccc2S(O)(O)O	0	C287H76N67O62S3+5	test
1c5n	refined	Protein-Ligand	1.5	Ki=20uM	Ki	4.7	2000	thrombin alpha	ESI	P28504 P00734	C9H8IN2S	303.143	302.945	21	22	79.85	4.41	1.67	0	0	1	Ic1cccc2c1cc(s2)C(=[NH2+])N	0	C222H83N60O70S5+5	train
1c5o	refined	Protein-Ligand	1.9	Ki=320uM	Ki	3.49	2000	thrombin alpha	BAM	P28504 P00734	C7H9N2	121.16	121.077	18	18	51.61	2.71	-0.15	0	0	1	NC(=[NH2+])c1ccccc1	0	C200H78N54O63S5+4	valid
1c5p	refined	Protein-Ligand	1.43	Ki=21uM	Ki	4.68	2000	trypsin beta	BAM	P00760	C7H9N2	121.16	121.077	18	18	51.61	2.71	-0.15	0	0	1	NC(=[NH2+])c1ccccc1	0	C198H76N53O63S5+3	valid
1c5q	refined	Protein-Ligand	1.43	Ki=0.44uM	Ki	6.36	2000	trypsin beta	ESI	P00760	C9H8IN2S	303.143	302.945	21	22	79.85	4.41	1.67	0	0	1	Ic1cccc2c1cc(s2)C(=[NH2+])N	0	C212H80N55O65S5+3	valid
1c5s	refined	Protein-Ligand	1.36	Ki=1.0uM	Ki	6	2000	trypsin beta	ESX	P00760	C9H9N2S	177.246	177.049	21	22	79.85	3.76	1.07	0	0	1	NC(=[NH2+])c1cc2c(s1)cccc2	0	C207H77N54O64S5+3	train
1c5t	refined	Protein-Ligand	1.37	Ki=80uM	Ki	4.1	2000	trypsin beta	ESP	P00760	C8H8N3S	178.234	178.044	20	21	92.74	3.03	0.46	0	1	1	NC(=[NH2+])c1cc2c(s1)nccc2	0	C202H75N52O62S4+3	train
1c5x	refined	Protein-Ligand	1.75	Ki=0.21uM	Ki	6.68	2000	urokinase-type plasminogen activator	ESI	P00749	C9H8IN2S	303.143	302.945	21	22	79.85	4.41	1.67	0	0	1	Ic1cccc2c1cc(s2)C(=[NH2+])N	0	C201H81N55O58S5+5	test
1c5y	refined	Protein-Ligand	1.65	Ki=63uM	Ki	4.2	2000	urokinase-type plasminogen activator	ESP	P00749	C8H8N3S	178.234	178.044	20	21	92.74	3.03	0.46	0	1	1	NC(=[NH2+])c1cc2c(s1)nccc2	0	C215H84N58O63S4+6	train
1c5z	general	Protein-Ligand	1.85	Ki=97uM	Ki	4.01	2000	urokinase-type plasminogen activator	BAM	P00749	C7H9N2	121.16	121.077	18	18	51.61	2.71	-0.15	0	0	1	NC(=[NH2+])c1ccccc1	0	C213H86N58O63S5+6	train
1c6y	general	Protein-Ligand	2.5	Ki=0.31nM	Ki	9.51	2000	hiv-1 protease	MK1	O09893	C36H49N5O4	615.805	615.378	94	98	120.43	2.79	3.95	6	5	16	O[C@H](C[N@@H+]1CC[N@H+](C[C@H]1C(=O)NC(C)(C)C)Cc1cccnc1)C[C@H](C(=O)N[C@@H]1[C@H](O)Cc2c1cccc2)Cc1ccccc1	0	C339H114N92O100+6	train
1c70	refined	Protein-Ligand	2.5	Ki=0.05nM	Ki	10.3	2000	HIV-1 protease	L75	O92103	C39H50N4O5	654.838	654.378	98	103	120.68	4.3	5.3	6	4	16	O[C@@H](C[C@H](C(=O)N[C@@H]1[C@H](O)Cc2c1cccc2)Cc1ccccc1)C[N@@H+]1CC[N@H+](C[C@H]1C(=O)NC(C)(C)C)Cc1cc2c(o1)cccc2	0	C350H111N93O97S2+6	test
1c7e	general	Protein-Ligand	2.25	Kd=505nM	Kd	6.3	2000	flavodoxin	FMN hq	P00323	C17H24N4O9P	459.368	459.128	55	57	230.64	-2.43	-1.57	6	8	9	O=c1[nH]c(=O)c2c([nH]1)n(C[C@@H]([C@@H]([C@@H](COP(O)(O)O)O)O)O)c1c([nH]2)cc(c(c1)C)C	0	C224H66N58O85S3+2	valid
1c7f	general	Protein-Ligand	2	Kd=0.30nM	Kd	9.52	2000	flavodoxin	FMN ox	P00323	C17H22N4O9P	457.352	457.112	53	55	224.84	-2.56	-2	4	8	9	O=c1[nH]c(=O)c2c(n1)n(C[C@@H]([C@@H]([C@@H](COP(O)(O)O)O)O)O)c1c(n2)cc(c(c1)C)C	0	C220H64N57O82S3+2	test
1c83	refined	Protein-Ligand	1.8	Ki=14uM	Ki	4.85	2000	tyrosine phosphatase 1b	OAI	P18031	C11H8N2O5	248.192	248.043	26	27	119.49	2.99	0.96	2	5	2	O=C(C(=O)O)Nc1cc2[nH]ccc2cc1C(=O)O	0	C202H70N68O59S2+9	train
1c84	refined	Protein-Ligand	2.35	Ki=9.9uM	Ki	5	2000	tyrosine phosphatase 1b	761	P18031	C13H9NO5	259.214	259.048	28	29	103.7	4.12	1.63	1	5	2	OC(=O)C(=O)Nc1cc2ccccc2cc1C(=O)O	0	C220H72N75O64S3+10	train
1c85	general	Protein-Ligand	2.72	Ki=23uM	Ki	4.64	2000	protein-tyrosine phosphatase 1b	OBA	P18031	C9H7NO5	209.156	209.032	22	22	103.7	2.87	0.48	1	5	2	O=C(C(=O)O)Nc1ccccc1C(=O)O	0	C214H69N71O63S3+9	train
1c86	refined	Protein-Ligand	2.3	Ki=20uM	Ki	4.7	2000	tyrosine phosphatase 1b	OPA	P18031	C10H9NO6S	271.247	271.015	27	28	141.17	2.6	0.62	1	5	2	O=C(C(=O)O)Nc1sc2c(c1C(=O)O)CCOC2	0	C194H65N63O58S2+7	train
1c87	refined	Protein-Ligand	2.1	Ki=63uM	Ki	4.2	2000	tyrosine phosphatase 1b	OPA	P18031	C10H9NO6S	271.247	271.015	27	28	141.17	2.6	0.62	1	5	2	O=C(C(=O)O)Nc1sc2c(c1C(=O)O)CCOC2	0	C201H67N69O60S2+9	train
1c88	refined	Protein-Ligand	1.8	Ki=5.1uM	Ki	5.29	2000	tyrosine phosphatase 1b	OTA	P18031	C10H11N2O5S	271.27	271.039	29	30	148.55	0.04	0.73	2	5	2	O=C(C(=O)O)Nc1sc2c(c1C(=O)O)CC[NH2+]C2	0	C201H67N66O60S2+8	train
1c8k	general	Protein-Ligand	1.76	IC50=1uM	IC50	6	2000	glycogen phosphorylase	CPB	P00489	C21H21ClNO5	402.848	402.111	49	52	95.34	3.25	3.46	4	4	5	C[N@H+]1CC[C@@H]([C@@H](C1)O)c1c(O)cc(c2c1oc(cc2=O)c1ccccc1Cl)O	0	C201H67N57O55S2+7	train
1c8l	general	Protein-Ligand	2.3	IC50=6.9nM	IC50	8.16	2000	glycogen phosphorylase	BIN	P00489	C20H22ClNO6	407.845	407.114	50	51	104.14	5.32	3.35	0	5	5	CCN1C(=C(C(=O)OC(C)C)[C@H](C(=C1C(=O)O)C(=O)O)c1ccccc1Cl)C	0	C304H105N91O83+13	train
1c8v	general	Protein-Ligand	2.2	IC50=472nM	IC50	6.33	2000	tryptophan synthase (alpha chain)	HE1	P00929 P0A2K1	C10H16O4PS	263.27	263.051	32	32	119.81	0.8	2	1	4	6	Oc1ccccc1SCCCCP(O)(O)O	0	C335H111N85O94S2+4	train
1c9d	general	Protein-Ligand	2.3	IC50=499nM	IC50	6.3	1999	tryptophan synthase (alpha chain)	HF1	P00929 P0A2K1	C10H15FO4PS	281.261	281.041	32	32	119.81	0.9	2.14	1	4	6	Oc1ccc(cc1SCCCCP(O)(O)O)F	0	C337H110N83O92S2+4	test
1ca8	general	Protein-Ligand	2.1	Ki=0.32nM	Ki	9.49	1999	thrombin	0KV	P01050 P00734	C23H37N6O5S	509.642	509.255	72	74	179.24	1.11	1.82	3	5	12	OC[C@@H](NC(=O)CN1CCC[C@@H](C1=O)NS(=O)(=O)Cc1ccccc1)C[C@@H]1CCC[N+](=C(N)N)C1	0	C342H109N92O98S6+8	valid
1caq	general	Protein-Ligand	1.8	Ki=19nM	Ki	7.72	1999	stromelysin-1	DPS	P08254	C28H29N3O4S	503.613	503.188	65	69	110.88	5.84	6.06	2	4	7	OC(=O)[C@@H](NS(=O)(=O)c1ccc(cc1)N1CC[C@H](CC1)c1ccccc1)Cc1c[nH]c2c1cccc2	1	C365H113N89O95SZn2+7	test
1cbr	general	Protein-Ligand	2.9	Kd=0.4nM	Kd	9.4	1995	mouse cellular retinol-binding protein (CRBP-1)	REA	P62965	C20H28O2	300.435	300.209	50	50	37.3	7.23	5.6	0	2	4	C/C(=C\C=C\C(=C\C(=O)O)\C)/C=C/C1=C(C)CCCC1(C)C	0	C328H113N93O86S4+11	train
1cbx	refined	Protein-Ligand	2	Ki=0.45uM	Ki	6.35	1994	carboxypeptidase a	BZS	P00730	C11H12O4	208.211	208.074	27	27	74.6	3.86	1.4	0	4	3	OC(=O)[C@H](Cc1ccccc1)CC(=O)O	1	C302H93N75O86Zn+3	train
1ce5	general	Protein-Ligand	1.9	Ki=18.4uM	Ki	4.74	1999	trypsin beta	BEN	P00760	C7H9N2	121.16	121.077	18	18	51.61	2.71	-0.15	0	0	1	NC(=[NH2+])c1ccccc1	0	C189H71N52O61S5+3	test
1cea	general	Protein-Ligand	2.1	Kd=11uM	Kd	4.96	1996	plasminogen	ACA	P00747	C6H14NO2	132.181	132.102	23	22	64.94	-0.98	-0.13	1	2	4	[NH3+]CCCCCC(=O)O	0	C188H58N54O52S3+6	test
1ceb	refined	Protein-Ligand	2.1	Kd=1uM	Kd	6	1996	plasminogen	AMH	P00747	C8H16NO2	158.218	158.118	27	27	64.94	-0.8	0.12	1	2	1	[NH3+]C[C@@H]1CC[C@H](CC1)C(=O)O	0	C165H46N52O45S+5	train
1cet	refined	Protein-Ligand	2.05	Ki=1.3mM	Ki	2.89	1999	lactate dehydrogenase	CLQ	Q27743	C18H27ClN3	320.88	320.189	49	50	29.36	4.72	3.47	2	1	8	CC[NH+](CCC[C@H](Nc1ccnc2c1ccc(c2)Cl)C)CC	0	C199H67N46O55S2+2	train
1cgl	refined	Protein-Ligand	2.4	Ki=0.135uM	Ki	6.87	1995	adenosine deaminase	0ED	P03956	C33H49N5O7	627.771	627.363	94	96	164.11	1.67	2.23	5	5	21	CC(C[C@@H](C(=O)N[C@H](C(=O)NCC[NH+]1CCOCC1)Cc1ccccc1)[NH2+][C@@H](C(=O)O)CCNC(=O)OCc1ccccc1)C	1	C296H96CaN78O82SZn2+7	train
1ch8	general	Protein-Ligand	2.5	Ki=0.1uM	Ki	7	1999	adenylosuccinate synthetase	GPX	P0A7D4	C10H17N5O13P3	508.189	508.004	48	51	318.12	-5.9	-2.02	2	9	5	Nc1[nH]c(=O)c2c(n1)n(cn2)[C@@H]1O[C@@H]([C@@H]2[C@H]1OP(O2)(O)O)COP(OP(O)(O)O)(O)O	1	C344H123MgN97O106S3+10	valid
1ci7	general	Protein-Ligand	2.6	Ki=90nM	Ki	7.05	2000	thymidylate synthase	CB3	P13100	C24H23N5O6	477.469	477.165	58	60	178.71	2.94	2.17	3	6	10	C#CCN(c1ccc(cc1)C(=O)N[C@@H](C(=O)O)CCC(=O)O)Cc1ccc2c(c1)c(=O)nc([nH]2)N	0	C393H130N104O102S6+11	test
1cil	general	Protein-Ligand	1.6	Ki=0.37nM	Ki	9.43	1994	carbonic anhydrase ii	ETS	P00918	C10H17N2O4S3	325.448	325.035	36	37	155.91	0.41	2.45	2	4	3	CC[NH2+][C@H]1C[C@H](C)S(=O)(=O)c2c1cc(s2)S(=O)(=O)N	1	C308H96N73O64S2Zn+4	train
1cim	general	Protein-Ligand	2.1	Ki=1.52nM	Ki	8.82	1994	carbonic anhydrase ii	PTS	P00918	C8H13N2O4S3	297.395	297.004	30	31	166.94	-0.47	2.11	2	4	1	C[C@H]1C[C@H]([NH3+])c2c(S1(=O)=O)sc(c2)S(=O)(=O)N	1	C263H91N64O56Zn+5	valid
1cin	general	Protein-Ligand	2.1	Ki=1.88nM	Ki	8.73	1994	carbonic anhydrase ii	MTS	P00918	C9H15N2O4S3	311.421	311.019	33	34	155.91	0.04	2.06	2	4	2	C[NH2+][C@H]1C[C@H](C)S(=O)(=O)c2c1cc(s2)S(=O)(=O)N	1	C272H91N70O58SZn+5	train
1ciz	refined	Protein-Ligand	1.64	Ki=36nM	Ki	7.44	1999	stromelysin-1	DPS	P08254	C28H29N3O4S	503.613	503.188	65	69	110.88	5.84	6.06	2	4	7	OC(=O)[C@H](NS(=O)(=O)c1ccc(cc1)N1CC[C@H](CC1)c1ccccc1)Cc1c[nH]c2c1cccc2	1	C354H108N87O94SZn2+7	valid
1cj1	general	Protein-Ligand	3	IC50=1.6nM	IC50	8.8	1999	growth factor receptor bound protein 2	C78	P62993	C31H41N5O9P	658.659	658.264	87	90	249.15	1.73	4.35	5	7	15	O=C(N[C@H](C(=O)NC1(CCCCC1)C(=O)N[C@@H]1C=CCC[C@@H]1C(=O)N)Cc1ccc(cc1)OP(O)(O)O)OCc1cccc(c1)N	0	C207H64N60O55+6	train
1cka	general	Protein-Ligand	1.5	Kd=1.9uM	Kd	5.72	1995	c-crksh3-n	10-mer	Q64010	C46H82N11O8	917.212	916.635	147	151	269.53	0.76	0.41	7	8	30	[NH3+]CCCC[C@@H](C(=O)N[C@@H](CCCC[NH3+])C)NC(=O)[C@@H]1CCCN1C(=O)[C@@H]1CCCN1C(=O)[C@@H](NC(=O)[C@@H](NC(=O)[C@@H]1CCCN1C(=O)[C@@H]1CCCN1C(=O)[C@@H]1CCC[NH2+]1)C)CC(C)C	0	C166H46N35O49S+	train
1ckb	general	Protein-Ligand	1.9	Kd=5.2uM	Kd	5.28	1995	c-crksh3-n	10-mer	Q64010	C39H67N11O7	802.019	801.522	124	128	251.16	2.03	-0.15	4	7	22	CC(NC(=O)[C@@H](NC(=O)[C@@H]1CCCN1C(=O)[C@@H]1CCCN1C(=O)[C@H](C(C)C)NC(=O)[C@@H]1CCCN1C(=O)[C@@H]1CCCN1C(=O)[C@@H]1CCC[NH2+]1)CCC[NH+]=C(N)N)C	0	C167H47N35O49S+	train
1clu	general	Protein-Ligand	1.7	Kd=5.4nM	Kd	8.27	1999	transforming protein p21/h-ras-1	DBG	P01112	C11H23N7O12P3	538.261	538.062	56	58	343.95	-6.84	-2.49	6	10	11	CNP(NP(OP(OC[C@H]1O[C@H]([C@@H]([C@@H]1O)O)n1cnc2c1nc(N)[nH]c2=O)(O)O)(O)O)(O)O	1	C197H73MgN57O68S+5	valid
1cnw	refined	Protein-Ligand	2	Kd=19nM	Kd	7.72	1995	carbonic anhydrase ii	EG1	P00918	C15H25N4O6S	389.447	389.149	51	51	172.84	-2.13	0.02	4	4	14	[NH3+]CC(=O)NCCOCCOCCNC(=O)c1ccc(cc1)S(=O)(=O)N	1	C335H103N84O73SZn+7	valid
1cnx	refined	Protein-Ligand	1.9	Kd=43nM	Kd	7.37	1995	carbonic anhydrase ii	EG2	P00918	C13H22N3O5S	332.396	332.128	44	44	143.74	-1.47	0.51	3	3	11	[NH3+]CCOCCOCCNC(=O)c1ccc(cc1)S(=O)(=O)N	1	C370H116N97O93SZn+7	test
1cny	refined	Protein-Ligand	2.3	Kd=14nM	Kd	7.85	1995	carbonic anhydrase ii	EG3	P00918	C22H31N4O6S	479.57	479.196	64	65	172.84	-0.14	1.63	4	4	16	[NH3+][C@H](C(=O)NCCOCCOCCNC(=O)c1ccc(cc1)S(=O)(=O)N)Cc1ccccc1	1	C351H102HgN91O80SZn+6	test
1cp6	general	Protein-Ligand	1.9	Ki=10uM	Ki	5	1999	aminopeptidase	BUB	Q01693	C3H9BO2	87.913	88.07	15	14	40.46	0.42	-0.13	2	2	4	CCCB(O)O	1	C187H78N47O69S4Zn2+2	train
1cpi	general	Protein-Ligand	2.05	IC50=39nM	IC50	7.41	1996	hiv-1 protease	5-mer	P03369	C34H54N7O8	688.835	688.403	103	105	236.48	0.49	2.22	8	7	16	CC[C@@H]([C@@H](C(=O)N[C@H](C(=O)N)C(C)C)NC(=O)[C@@H]1CCC[N@H+]1C[C@@H]([C@H]1NC(=O)[C@H](CC(=O)N)NC(=O)CCCOc2ccc(C1)cc2)O)C	0	C343H112N92O98S2+6	train
1cps	refined	Protein-Ligand	2.25	Ki=0.22uM	Ki	6.66	1993	carboxypeptidase a	CPM	P00730	C11H16N2O2S	240.322	240.093	32	32	93.38	4.86	3.09	0	2	4	OC(=O)[C@@H](CS(=N)(=N)C)Cc1ccccc1	1	C249H93N70O78Zn+4	train
1cqp	general	Protein-Ligand	2.6	IC50=2.4uM	IC50	5.62	2000	antigen cd11a (p180)	803	P20701	C24H36O5	404.54	404.256	65	67	72.83	4.29	4.2	1	3	8	CC[C@@H](C(=O)O[C@H]1C[C@@H](C)C=C2[C@H]1[C@@H](CC[C@@H]1C[C@@H](O)CC(=O)O1)[C@H](C=C2)C)C	0	C272H86N54O62S2+5	train
1cr6	general	Protein-Ligand	2.8	Ki=3.1nM	Ki	8.51	1999	epoxide hydrolase	CPU	P34914	C16H24N2O	260.375	260.189	43	44	41.13	3.49	4.03	2	1	7	O=C(NC1CCCCC1)NCCCc1ccccc1	0	C397H125N95O96S4+7	train
1cs4	general	Protein-Ligand	2.5	IC50=2.7uM	IC50	5.57	2001	adenylate cyclase, type v	101	P04896 P26769 P30803	C10H15N5O6P	332.23	332.076	37	39	182.59	-2.74	-0.69	2	7	4	OC[C@H]1O[C@H](C[C@@H]1OP(O)(O)O)n1cnc2c1ncnc2N	1	C297H107MgN72O84S3+6	train
1csh	general	Protein-Ligand	1.6	Ki=28nM	Ki	7.55	1994	citrate synthase	AMX	P23007	C23H42N8O17P3	795.544	795.188	93	95	439.9	-7.19	-1.58	6	15	23	O=C(NCCCC(=O)N)CCNC(=O)[C@@H](C(COP(OP(OC[C@H]1O[C@H]([C@@H]([C@@H]1OP(O)(O)O)O)n1cnc2c1ncnc2N)(O)O)(O)O)(C)C)O	0	C427H137N132O115S3+15	test
1csi	general	Protein-Ligand	1.7	Ki=1.6nM	Ki	8.8	1994	citrate synthase	CMX	P23007	C23H41N7O18P3	796.529	796.172	92	94	434.11	-5.1	-1.68	5	16	22	O=C(NCCCC(=O)O)CCNC(=O)[C@@H](C(COP(OP(OC[C@H]1O[C@H]([C@@H]([C@@H]1OP(O)(O)O)O)n1cnc2c1ncnc2N)(O)O)(O)O)(C)C)O	0	C447H146N137O117S3+16	valid
1csr	general	Protein-Ligand	1.7	Ki=42nM	Ki	7.38	1995	citrate synthase	FAM	P23007	C23H41FN8O17P3	813.535	813.179	93	95	439.9	-6.72	-1.63	6	15	23	O=C(NCC[C@H](C(=O)N)F)CCNC(=O)[C@@H](C(COP(OP(OC[C@H]1O[C@H]([C@@H]([C@@H]1OP(O)(O)O)O)n1cnc2c1ncnc2N)(O)O)(O)O)(C)C)O	0	C416H123N121O106S3+12	test
1css	general	Protein-Ligand	1.7	Ki=0.8uM	Ki	6.1	1995	citrate synthase	FCX	P23007	C23H40FN7O18P3	814.519	814.163	92	94	434.11	-5.18	-1.73	5	16	22	O=C(NCC[C@@H](C(=O)O)F)CCNC(=O)[C@@H](C(COP(OP(OC[C@H]1O[C@H]([C@@H]([C@@H]1OP(O)(O)O)O)n1cnc2c1ncnc2N)(O)O)(O)O)(C)C)O	0	C441H126N132O117S3+13	train
1ct8	general	Protein-Ligand	2.2	Kd=0.3uM	Kd	6.52	1999	fab fragment 7c8	TAA	P01868 P01837	C20H20Cl2F3N3O8P	589.263	588.032	57	58	187.53	2.04	4.37	3	7	13	OC[C@H]([C@@H](c1ccc(cc1)N(=O)=O)OP(Cc1ccc(cc1)NC(=O)C(F)(F)F)(O)O)NC(=O)C(Cl)Cl	0	C323H90N84O80+9	valid
1ctr	general	Protein-Ligand	2.45	Kd=1uM	Kd	6	1994	human calmodulin (CaM)	TFP	P0DP23	C21H20F3N3S	403.464	403.133	48	51	38.4	4.74	6.17	0	0	4	Cn1ccn(cc1)CCCN1c2ccccc2Sc2c1cc(cc2)C(F)(F)F	0	C313H106N75O91S6+5	train
1ctt	refined	Protein-Ligand	2.2	Ki=30uM	Ki	4.52	1995	cytidine deaminase	DHZ	P0ABF6	C9H14N2O5	230.218	230.09	30	31	102.26	-1.96	-1.77	4	4	5	OC[C@H]1O[C@H]([C@@H]([C@@H]1O)O)N1C=CCNC1=O	1	C273H96N76O82S5Zn+3	train
1ctu	refined	Protein-Ligand	2.3	Ki=1.2pM	Ki	11.92	1995	cytidine deaminase	ZEB	P0ABF6	C9H14N2O6	246.217	246.085	31	32	122.49	-2.51	-2.45	5	5	6	OC[C@H]1O[C@H]([C@@H]([C@@H]1O)O)N1C=C[C@H](NC1=O)O	1	C275H91N76O84S5Zn+3	test
1cw2	general	Protein-Ligand	2	IC50=715nM	IC50	6.15	1999	tryptophan synthase (alpha chain)	HSP	P00929 P0A2K1	C10H16O5PS	279.27	279.046	33	33	130.79	-0.1	1.89	1	5	4	O=[S@@](c1ccccc1O)CCCCP(O)(O)O	0	C347H113N87O96S3+4	train
1cx9	general	Protein-Ligand	2.3	IC50=178nM	IC50	6.75	1999	tryptophan synthase (alpha chain)	NHP	P00929 P0A2K1	C10H17NO3PS	262.286	262.067	33	33	125.6	0.48	2.46	1	3	5	Nc1ccccc1SCCCCP(O)(O)O	0	C366H116N89O100S3+4	train
1czc	general	Protein-Ligand	2.5	Kd=1.5mM	Kd	2.82	2000	aspartate aminotransferase	GUA	P00509	C5H8O4	132.115	132.042	17	16	74.6	2.46	0.33	0	4	2	OC(=O)CCCC(=O)O	0	C280H86N78O74S2+6	train
1cze	general	Protein-Ligand	2.4	Kd=2.4mM	Kd	2.62	2000	aspartate aminotransferase	SIN	P00509	C4H6O4	118.088	118.027	14	13	74.6	2.11	-0.06	0	4	1	OC(=O)CCC(=O)O	0	C272H92N71O71S3+5	train
1czk	general	Protein-Ligand	1.9	Kd=1.5nM	Kd	8.82	1999	flavodoxin	FMN ox	P10340	C17H22N4O9P	457.352	457.112	53	55	224.84	-2.56	-2	4	8	9	O=c1[nH]c(=O)c2c(n1)n(C[C@@H]([C@@H]([C@@H](COP(O)(O)O)O)O)O)c1c(n2)cc(c(c1)C)C	0	C255H76N65O86S2+	train
1czl	general	Protein-Ligand	1.8	Kd=0.71nM	Kd	9.15	1999	flavodoxin	FMN sq	P10340	C17H22N4O9P	457.352	457.112	53	55	224.84	-2.56	-2	4	8	9	O=c1[nH]c(=O)c2c(n1)n(C[C@@H]([C@@H]([C@@H](COP(O)(O)O)O)O)O)c1c(n2)cc(c(c1)C)C	0	C240H75N62O85S2+	train
1czo	general	Protein-Ligand	1.85	Kd=28uM	Kd	4.55	1999	flavodoxin	FMN hq	P10340	C17H24N4O9P	459.368	459.128	55	57	230.64	-2.43	-1.57	6	8	9	O=c1[nH]c(=O)c2c([nH]1)n(C[C@@H]([C@@H]([C@@H](COP(O)(O)O)O)O)O)c1c([nH]2)cc(c(c1)C)C	0	C253H76N63O86S2+	valid
1czr	general	Protein-Ligand	1.9	Kd=1.0nM	Kd	9	1999	flavodoxin	FMN ox	P10340	C17H22N4O9P	457.352	457.112	53	55	224.84	-2.56	-2	4	8	9	O=c1[nH]c(=O)c2c(n1)n(C[C@@H]([C@@H]([C@@H](COP(O)(O)O)O)O)O)c1c(n2)cc(c(c1)C)C	0	C255H76N65O86S2+	test
1d04	general	Protein-Ligand	1.85	Kd=26uM	Kd	4.59	1999	flavodoxin	FMN hq	P10340	C17H24N4O9P	459.368	459.128	55	57	230.64	-2.43	-1.57	6	8	9	O=c1[nH]c(=O)c2c([nH]1)n(C[C@@H]([C@@H]([C@@H](COP(O)(O)O)O)O)O)c1c([nH]2)cc(c(c1)C)C	0	C255H77N64O87S2+	train
1d09	refined	Protein-Ligand	2.1	Ki=27nM	Ki	7.57	2000	aspartate carbamoyltransferase	PAL	P0A786 P0A7F3	C6H11NO8P	256.127	256.022	27	26	177.98	-0.96	-1.84	1	8	4	O=C(CP(O)(O)O)N[C@H](C(=O)O)CC(=O)O	0	C314H110N102O98S+12	train
1d1p	general	Protein-Ligand	2.2	Ki=0.25mM	Ki	3.6	2000	protein-tyrosine phosphatase	EPE	P40347	C8H20N2O4S	240.32	240.114	35	35	91.86	-4	-0.13	4	4	7	OCC[N@@H+]1CC[N@H+](CC1)CCS(=O)(=O)O	0	C180H64N47O55S4+3	train
1d2e	refined	Protein-Ligand	1.94	Kd=1uM	Kd	6	1999	elongation factor tu (ef-tu)	GDP	P49410	C10H17N5O11P2	445.216	445.04	45	47	286.07	-5.72	-2.75	4	9	7	O[C@@H]1[C@@H](COP(OP(O)(O)O)(O)O)O[C@H]([C@@H]1O)n1cnc2c1nc(N)[nH]c2=O	1	C225H88MgN65O76S2+5	test
1d2s	general	Protein-Ligand	1.55	Kd=0.182nM	Kd	9.74	2000	N-terminal laminin G-like domain of human sex hormone-binding globulin	DHT	P04278	C19H30O2	290.44	290.225	51	54	37.3	3.77	3.96	1	2	1	O=C1CC[C@]2([C@H](C1)CC[C@@H]1[C@@H]2CC[C@]2([C@H]1CC[C@@H]2O)C)C	1	C327H101CaN78O87S3+7	train
1d3d	refined	Protein-Ligand	2.04	Kd=0.81nM	Kd	9.09	2000	thrombin alpha	BZT	P01050 P00734	C32H37BrN2O2S	593.617	592.176	75	80	66.58	7.68	8	3	1	10	Oc1ccc2c(c1)sc(c2Cc1ccc(c(c1)Br)C[NH+]1CCCC1)c1ccc(cc1)OCC[NH+]1CCCC1	0	C352H117N94O103S6+8	train
1d3p	refined	Protein-Ligand	2.1	Kd=41nM	Kd	7.39	2000	thrombin alpha	BT3	P01050 P00734	C32H39N3O3S	545.735	545.271	78	83	88.7	6.43	6.51	3	2	12	Oc1ccc2c(c1)sc(c2Cc1ccc(cc1)OCC[NH+]1CCCC1)c1ccc(nc1)OCC[NH+]1CCCC1	0	C344H116N92O100S6+8	train
1d3q	general	Protein-Ligand	2.9	Kd=0.29uM	Kd	6.54	2000	thrombin alpha	BT2	P01050 P00734	C33H40N2O2S	528.748	528.281	78	83	55.58	7.52	7.41	2	0	11	C1CC[NH+](C1)CCOc1ccc(cc1)Cc1c(sc2c1cccc2)c1ccc(cc1)OCC[NH+]1CCCC1	0	C343H118N92O100S6+9	train
1d3v	general	Protein-Ligand	1.7	Kd=0.11uM	Kd	6.96	1999	arginase	ABH	P07824	C6H16BNO5	193.006	193.112	29	28	125.63	-2.59	-2.23	4	5	8	OC(=O)[C@H](CCCC[B](O)(O)O)[NH3+]	1	C239H82Mn2N72O84S2+3	train
1d4h	refined	Protein-Ligand	1.81	Ki=0.10nM	Ki	10	2002	hiv-1 protease	BEH	P03366	C36H38N2O7	610.696	610.268	83	87	137.35	3.43	3.75	5	5	19	O=C([C@@H]([C@@H]([C@H]([C@H](C(=O)NCc1ccccc1)OCc1ccccc1)O)O)OCc1ccccc1)N[C@@H]1[C@H](O)Cc2c1cccc2	0	C372H117N97O103S2+6	train
1d4i	refined	Protein-Ligand	1.81	Ki=1.40nM	Ki	8.85	2002	hiv-1 protease	BEG	P03366	C38H40N2O7	636.733	636.284	87	92	137.35	3.86	4.24	5	5	18	O=C([C@@H](C[C@H]([C@H](C(=O)N[C@@H]1[C@H](O)Cc2c1cccc2)OCc1ccccc1)O)OCc1ccccc1)N[C@@H]1[C@H](O)Cc2c1cccc2	0	C373H118N98O104S2+6	train
1d4j	refined	Protein-Ligand	1.81	Ki=4.40nM	Ki	8.36	2002	hiv-1 protease	MSC	P03366	C36H36ClFN2O7	663.132	662.22	83	87	137.35	4.16	4.54	5	5	19	O=C([C@@H]([C@@H]([C@H]([C@H](C(=O)NCc1c(F)cccc1Cl)OCc1ccccc1)O)O)OCc1ccccc1)N[C@@H]1[C@H](O)Cc2c1cccc2	0	C370H117N97O103S2+6	valid
1d4k	refined	Protein-Ligand	1.85	Ki=0.6nM	Ki	9.22	2000	HIV-1 protease	PI8	P03369	C41H55N4O6	699.899	699.412	106	110	153.6	4.94	3.8	6	5	14	CC[C@@H]([C@@H]1NC(=O)[C@@H]([NH2+]C[C@H](C[C@H](C(=O)N[C@@H]2[C@H](O)Cc3c2cccc3)Cc2ccccc2)O)Cc2ccc(cc2)OCCCCCNC1=O)C	0	C348H116N93O99S2+6	test
1d4l	refined	Protein-Ligand	1.75	Ki=1.7nM	Ki	8.77	2000	HIV-1 protease	PI9	P03369	C32H48N4O6S	616.812	616.329	91	93	159.44	4.26	5.81	4	5	10	CC(CCN(S(=O)(=O)c1ccc(cc1)N)C[C@H]([C@@H]1Cc2ccc(cc2)OCCCCCC(=O)N[C@H](C(=O)N1)C(C)C)O)C	0	C348H115N92O97S2+6	train
1d4p	refined	Protein-Ligand	2.07	Kd=0.5uM	Kd	6.3	1999	thrombin alpha	BPP	P01050 P00734	C22H25N4O	361.46	361.203	52	55	87.71	5.33	2.37	1	1	5	O=C(c1cc2c([nH]1)ccc(c2)C(=[NH2+])N)N1CCC(CC1)Cc1ccccc1	0	C306H108N85O91S6+7	train
1d4w	general	Protein-Ligand	1.8	Kd=120nM	Kd	6.92	1999	SAP	11-mer	O60880 Q13291	C52H91N13O19P	1233.33	1232.63	176	176	564.63	-7.53	-1.68	15	18	49	[NH3+]CCCC[C@@H](C(=O)O)NC(=O)[C@@H](NC(=O)[C@H](C(C)C)NC(=O)[C@@H](NC(=O)[C@@H](NC(=O)[C@@H](NC(=O)[C@H]([C@H](CC)C)NC(=O)[C@H]([C@H](O)C)NC(=O)[C@@H](NC(=O)[C@H](CO)[NH3+])CC(C)C)Cc1ccc(cc1)OP(O)(O)O)C)CCC(=O)N)CCC(=O)N	0	C209H63N54O61S2+5	train
1d4y	refined	Protein-Ligand	1.97	Ki=0.008nM	Ki	11.1	1999	HIV-1 protease	TPV	P03367	C31H33F3N2O5S	602.664	602.206	75	78	113.97	6.97	8.48	2	5	12	CCC[C@@]1(CCc2ccccc2)CC(=C(C(=O)O1)[C@@H](c1cccc(c1)NS(=O)(=O)c1ccc(cn1)C(F)(F)F)CC)O	0	C313H103N83O88S+5	train
1d5j	general	Protein-Ligand	2.6	IC50=0.7nM	IC50	9.15	2000	stromelysin-1	MM3	P08254	C15H22N2O5S2	374.476	374.097	46	47	129.62	1.33	2.89	2	4	6	ONC(=O)[C@H]1N(CCCSC1(C)C)S(=O)(=O)c1ccc(cc1)OC	1	C247H77CaN58O56SZn+5	train
1d5r	general	Protein-Ligand	2.1	Ki=15mM	Ki	1.82	1999	tyrosine phosphatase	TLA	P60484	C4H6O6	150.087	150.016	16	15	115.06	-0.12	-2.12	2	6	3	O[C@H]([C@H](C(=O)O)O)C(=O)O	0	C173H58N50O47S3+7	valid
1d6n	general	Protein-Ligand	2.7	Ki=31.5uM	Ki	4.5	1999	hypoxanthine-guanine phosphoribosyltransferase	PPO	P00492	C5H4N4O	136.111	136.039	14	15	70.47	-0.7	-0.76	1	1	0	O=c1[nH]cnc2c1N=NC2	1	C176H66MgN45O56S2+3	train
1d6s	general	Protein-Ligand	2.3	Kd=78uM	Kd	4.11	2000	o-acetylserine sulfhydrylase	PLP	P0A1E3	C13H20N2O7PS	379.346	379.073	44	44	191.59	0.02	0.89	1	7	8	CSCC[C@@H](C(=O)O)/N=C/c1c(cnc(c1O)C)COP(O)(O)O	0	C391H145N108O115S5+5	test
1d6v	refined	Protein-Ligand	2	Kd=670nM	Kd	6.17	2000	chimeric germline precursor of oxy-cope	HOP	P01834 P01857	C23H27NO4	381.465	381.194	55	57	86.63	4.71	4.08	2	4	8	OC(=O)CCCNC(=O)c1ccc(cc1)[C@H]1CC[C@@H](C[C@@H]1O)c1ccccc1	0	C368H95N81O93S+6	train
1d6w	refined	Protein-Ligand	2	Ki=1100nM	Ki	5.96	2000	thrombin alpha	00R	P28511 P00734	C24H29N7O5S	527.596	527.195	66	70	175.25	1.05	2.6	3	6	8	O=C([C@@H]1C=CCn2n1c(=O)n(c2=O)CCS(=O)(=O)c1ccccc1)N[C@@H]1CC[C@H](CC1)c1cnc([nH]1)N	0	C317H101N86O92S5+6	train
1d7i	refined	Protein-Ligand	1.9	Kd=250uM	Kd	3.6	1999	FK506 binding protein	DSS	P62942	C3H8OS2	124.225	124.002	14	13	61.58	0.07	1.55	0	1	1	CSC[S@@](=O)C	0	C199H63N45O47S+3	test
1d7j	refined	Protein-Ligand	1.85	Kd=500uM	Kd	3.3	1999	FK506 binding protein	BUQ	P62942	C4H8O2	88.105	88.052	14	13	37.3	-0.8	-0.04	1	2	3	CC(=O)CCO	0	C206H70N46O48S+4	test
1d7x	general	Protein-Ligand	2	IC50=3nM	IC50	8.52	2000	stromelysin-1 precursor	SPC	P08254	C13H17N3O6S	343.356	343.084	40	41	125.91	0.07	1.38	2	4	7	CO/N=C/1\C[C@@H](N(C1)S(=O)(=O)c1ccc(cc1)OC)C(=O)NO	1	C329H112CaN80O95SZn+5	train
1d8e	general	Protein-Ligand	3	IC50=50nM	IC50	7.3	2000	farnesyltransferase alpha subunit	11-mer	Q02293 Q04631 P01116	C29H57N7O8S2	695.935	695.371	103	102	322.41	-1.39	-0.76	8	8	29	[NH3+]CCCC[C@@H](C(=O)N[C@H](C(=O)N[C@H](C(=O)N[C@H](C(=O)N[C@H](C(=O)O)CCSC)[C@H](CC)C)C(C)C)CS)NC(=O)[C@H]([C@H](O)C)[NH3+]	0	C446H135N115O118S8+8	train
1d8f	general	Protein-Ligand	2.4	IC50=18nM	IC50	7.74	2000	stromelysin-1 precursor	SPI	P08254	C20H23N3O7S	449.478	449.126	54	56	133.86	1.1	2.56	2	5	10	ONC(=O)[C@H]1CN(CCN1S(=O)(=O)c1ccc(cc1)OC)C(=O)OCc1ccccc1	1	C314H96CaN73O81SZn+5	train
1d8m	general	Protein-Ligand	2.44	IC50=3.1nM	IC50	8.51	2000	stromelysin-1 precursor	BBH	P08254	C19H21N3O6S	419.452	419.115	50	52	124.63	0.73	2.3	2	5	8	ONC(=O)[C@H]1CC(=O)N(CN1S(=O)(=O)c1ccc(cc1)OC)Cc1ccccc1	1	C287H91CaN66O72SZn+4	valid
1d9i	refined	Protein-Ligand	2.3	Ki=0.78nM	Ki	9.11	2000	thrombin alpha	00P	P28504 P00734	C22H30N5O5S	476.569	476.197	63	66	148.19	0.79	0.78	2	5	8	O=C([C@@H]1C=CCn2n1c(=O)n(c2=O)CCS(=O)(=O)c1ccccc1)NC[C@@H]1CC[C@H](CC1)[NH3+]	0	C308H98N84O90S5+7	train
1dar	refined	Protein-Ligand	2.4	Kd=11uM	Kd	4.96	1996	elongation factor g	GDP	Q5SHN5	C10H17N5O11P2	445.216	445.04	45	47	286.07	-5.72	-2.75	4	9	7	O[C@@H]1[C@@H](COP(OP(O)(O)O)(O)O)O[C@H]([C@@H]1O)n1cnc2c1nc(N)[nH]c2=O	0	C178H64N50O60S+6	valid
1db1	general	Protein-Ligand	1.8	Kd=0.55nM	Kd	9.26	2000	vitamin d nuclear receptor	VDX	P11473	C27H44O3	416.636	416.329	74	76	60.69	5.07	5.7	3	3	9	O[C@H]1C[C@H](O)C(=C)/C(=C\C=C\2/CCC[C@]3([C@H]2CC[C@@H]3[C@@H](CCCC(O)(C)C)C)C)/C1	0	C451H142N118O121S4+12	test
1db4	general	Protein-Ligand	2.2	IC50=0.057uM	IC50	7.24	1999	human non-pancreatic secretory phospholipase A2	8IN	P14555	C21H26N2O5P	417.415	417.158	55	57	131.53	1.15	3.23	1	4	8	NC(=O)Cc1c(C)n(c2c1cc(OCCCP(O)(O)O)cc2)Cc1ccccc1	1	C280H89CaN79O78S10+10	train
1db5	general	Protein-Ligand	2.8	IC50=0.152uM	IC50	6.82	1999	human non-pancreatic secretory phospholipase A2	6IN	P14555	C22H24N2O4	380.437	380.174	52	54	94.55	4.08	3.97	1	3	8	NC(=O)Cc1c(C)n(c2c1cc(OCCCC(=O)O)cc2)Cc1ccccc1	1	C276H94CaN76O78S9+9	train
1dbb	general	Protein-Ligand	2.7	Kd=1nM	Kd	9	1993	antibody fab fragment	STR	P01868	C21H30O2	314.462	314.225	53	56	34.14	4	4.72	0	2	1	O=C1CC[C@]2(C(=C1)CC[C@@H]1[C@@H]2CC[C@]2([C@H]1CC[C@@H]2C(=O)C)C)C	0	C266H76N64O69+	test
1dbj	general	Protein-Ligand	2.7	IC50=21nM	IC50	7.68	1994	antibody fab fragment	AE2	P01868	C19H30O2	290.44	290.225	51	54	37.3	3.87	3.96	1	2	1	O[C@@H]1CC[C@]2([C@@H](C1)CC[C@@H]1[C@@H]2CC[C@]2([C@H]1CCC2=O)C)C	0	C249H67N60O64+	train
1dbk	general	Protein-Ligand	3	IC50=8nM	IC50	8.1	1994	antibody fab fragment	ANO	P01868	C19H28O2	288.424	288.209	49	52	34.14	3.45	4.17	0	2	0	O=C1CC[C@]2([C@@H](C1)CC[C@@H]1[C@@H]2CC[C@]2([C@H]1CCC2=O)C)C	0	C267H71N63O69S+	train
1ddm	general	Protein-Ligand	NMR	Kd=1.7uM	Kd	5.77	2000	numb protein	11-mer	P16554	C58H77N12O19S	1278.37	1277.51	167	170	530.6	-1.45	-1.5	13	19	47	CSCC[C@@H](C(=O)N[C@H](C(=O)N[C@H](C(=O)N[C@H](C(=O)N[C@H](C(=O)N[C@H](C(=O)N1CCC[C@H]1C(=O)O)Cc1ccccc1)CC(=O)O)CCC(=O)O)Cc1ccccc1)CO)NC(=O)[C@@H](NC(=O)[C@@H](NC(=O)[C@@H](NC(=O)C[NH3+])Cc1ccccc1)CO)CC(=O)N	0	C155H49N41O46S3+3	valid
1det	refined	Protein-Ligand	1.8	Kd=50uM	Kd	4.3	1996	ribonuclease T1	2GP	P00651	C10H15N5O8P	364.229	364.066	39	41	222.79	-3.99	-2.43	4	7	5	OC[C@H]1O[C@H]([C@H]([C@@H]1O)OP(O)(O)O)n1cnc2c1nc(N)[nH]c2=O	0	C200H52N50O53+5	train
1df8	refined	Protein-Ligand	1.51	Kd=0.20nM	Kd	9.7	2000	streptavidin	BTN	P22629	C10H16N2O3S	244.311	244.088	32	33	103.73	1.78	1.45	2	3	4	OC(=O)CCCC[C@@H]1SC[C@H]2[C@@H]1NC(=O)N2	0	C277H79N73O77+4	valid
1dfo	general	Protein-Ligand	2.4	Ki=0.2uM	Ki	6.7	1999	serine hydroxymethyltransferase	FFO	P0A825	C20H21N7O7	471.423	471.15	55	57	220.17	0.54	0.74	4	7	9	O=CN1[C@@H](CNc2ccc(cc2)C(=O)N[C@H](C(=O)O)CCC(=O)O)C=Nc2c1c(=O)nc([nH]2)N	0	C320H102N90O88S+9	train
1dg9	general	Protein-Ligand	1.9	Ki=1.8mM	Ki	2.74	1999	protein-tyrosine phosphatase	EPE	P11064	C8H20N2O4S	240.32	240.114	35	35	91.86	-4	-0.13	4	4	7	OCC[N@@H+]1CC[N@H+](CC1)CCS(=O)(=O)O	0	C169H63N47O49S3+3	test
1dgm	refined	Protein-Ligand	1.8	Ki=8.9uM	Ki	5.05	2000	Toxoplasma gondii Adenosine Kinase	ADN	Q9TVW2	C10H13N5O4	267.241	267.097	32	34	139.54	-1.9	-1.4	4	6	5	OC[C@H]1O[C@H]([C@@H]([C@@H]1O)O)n1cnc2c1ncnc2N	0	C247H92N66O78S2+2	train
1dhi	refined	Protein-Ligand	1.9	Kd=55nM	Kd	7.26	1994	dihydrofolate reductase	MTX	P0ABQ4	C20H22N8O5	454.439	454.171	55	57	210.54	1.87	1.82	3	9	8	OC(=O)CC[C@@H](C(=O)O)NC(=O)c1ccc(cc1)N(Cc1cnc2c(n1)c(N)nc(n2)N)C	0	C391H112N107O100S5+8	test
1dhj	refined	Protein-Ligand	1.8	Kd=281nM	Kd	6.55	1994	dihydrofolate reductase	MTX	P0ABQ4	C20H22N8O5	454.439	454.171	55	57	210.54	1.87	1.82	3	9	8	OC(=O)CC[C@@H](C(=O)O)NC(=O)c1ccc(cc1)N(Cc1cnc2c(n1)c(N)nc(n2)N)C	0	C295H88N87O82S3+6	train
1di8	general	Protein-Ligand	2.2	IC50=1uM	IC50	6	2000	cell division protein kinase 2	DTQ	P24941	C16H15N3O3	297.309	297.111	37	39	76.5	3	3.17	2	3	5	COc1cc2c(ncnc2cc1OC)Nc1cccc(c1)O	0	C336H91N80O80+10	test
1di9	general	Protein-Ligand	2.6	IC50=5uM	IC50	5.3	2000	p38 map kinase	MSQ	Q16539	C17H17N3O2S	327.401	327.104	40	42	81.57	3.87	4.19	1	2	5	COc1cc2c(ncnc2cc1OC)Nc1cccc(c1)SC	0	C256H88N66O72S2+4	train
1dl7	refined	Protein-Ligand	2.35	Kd=0.32uM	Kd	6.49	2000	antibody m3c65 (light chain)	NCH	P01724 P01820	C11H19N2O6P	306.252	306.098	39	39	118.33	0.6	1.88	0	4	6	OP(Oc1ccc(cc1)N(=O)=O)(OCC[N+](C)(C)C)O	0	C239H60N64O62S+4	train
1dm2	general	Protein-Ligand	2.1	IC50=70nM	IC50	7.15	2000	cell division protein kinase 2	HMD	P24941	C11H10BrN5O2	324.133	323.002	29	31	112.7	0.21	0.19	3	2	1	NC1=NC(=O)C(=N1)[C@H]1CCNC(=O)c2c1cc([nH]2)Br	0	C241H65N57O58+7	train
1dmb	general	Protein-Ligand	1.8	Kd=1.80uM	Kd	5.74	1993	maltodextrin binding protein	BCD	P0AEX9	C42H70O35	1134.98	1134.37	147	154	554.05	-15.02	-15.23	21	21	28	OC[C@H]1O[C@@H]2O[C@@H]3[C@@H](CO)O[C@@H]([C@@H]([C@H]3O)O)O[C@@H]3[C@@H](CO)O[C@@H]([C@@H]([C@H]3O)O)O[C@@H]3[C@@H](CO)O[C@@H]([C@@H]([C@H]3O)O)O[C@@H]3[C@H](O[C@H](O[C@@H]4[C@H](O[C@H](O[C@@H]5[C@H](O[C@H](O[C@H]1[C@@H]([C@H]2O)O)[C@H](O)[C@H]5O)CO)[C@H](O)[C@H]4O)CO)[C@H](O)[C@H]3O)CO	0	C306H93N73O79S2+6	train
1dmp	refined	Protein-Ligand	2	Ki=0.28nM	Ki	9.55	1997	HIV-1 protease	DMQ	P04585	C33H36N4O3	536.664	536.279	76	80	116.05	3.94	5.27	4	3	10	Nc1cccc(c1)CN1[C@H](Cc2ccccc2)[C@H](O)[C@H]([C@H](N(C1=O)Cc1cccc(c1)N)Cc1ccccc1)O	0	C333H111N88O92+6	train
1dmt	general	Protein-Ligand	2.1	IC50=2nM	IC50	8.7	2000	human neutral endopeptidase (Neprilysin)	RDF	P08473	C23H35N3O10P	544.512	544.206	72	74	227.42	0.65	0.57	6	8	14	CC(C[C@@H](C(=O)N[C@H](C(=O)O)Cc1c[nH]c2c1cccc2)NP(O[C@@H]1O[C@@H](C)[C@@H]([C@H]([C@H]1O)O)O)(O)O)C	1	C378H123N100O104S2Zn+6	train
1doj	general	Protein-Ligand	1.7	Ki=1.1nM	Ki	8.96	2000	thrombin alpha	1Z0	P09945 P00734	C29H39N7O5S	597.729	597.273	81	84	230.69	2.19	0.17	3	6	15	C[NH2+][C@@H](C(=O)N1CCC[C@H]1C(=O)N[C@H]([C@@H](c1nc2c(s1)cc(cc2)C(=O)O)O)CCC[NH+]=C(N)N)Cc1ccccc1	0	C317H96N83O87S5+4	train
1dqn	refined	Protein-Ligand	1.75	Ki=10nM	Ki	8	2000	guanine phosphoribosyltransferase	IMU	Q24973	C11H18N5O7P	363.264	363.094	42	44	228.14	-6.97	-1.64	6	6	5	O[C@H]1[C@@H]([NH2+][C@@H]([C@H]1O)COP(O)(O)O)c1c[nH]c2c1nc(N)[nH]c2=O	1	C277H81Mg2N63O77S2+4	train
1dqx	general	Protein-Ligand	2.4	Ki=9pM	Ki	11.05	2000	orotidine 5'-monophosphate decarboxylase	BMP	P03962	C9H14N2O10P	341.189	341.039	36	37	208.29	-4.26	-3.47	4	8	6	O[C@@H]1[C@H](O)[C@H](O[C@H]1n1c(O)cc(=O)[nH]c1=O)COP(O)(O)O	0	C357H125N98O106S4+6	train
1drj	refined	Protein-Ligand	2.5	Kd=0.040uM	Kd	7.4	1995	rous sarcoma virus protease	RIP	P02925	C5H10O5	150.13	150.053	20	20	90.15	-2.52	-2.58	4	4	4	O[C@@H]1CO[C@H]([C@@H]([C@@H]1O)O)O	0	C263H101N77O87S+4	test
1drk	refined	Protein-Ligand	2	Kd=0.15uM	Kd	6.82	1995	rous sarcoma virus protease	RIP	P02925	C5H10O5	150.13	150.053	20	20	90.15	-2.52	-2.58	4	4	4	O[C@@H]1CO[C@H]([C@@H]([C@@H]1O)O)O	0	C254H100N74O84S+3	train
1drv	refined	Protein-Ligand	2.2	Kd=0.29uM	Kd	6.54	1997	DIHYDRODIPICOLINATE REDUCTASE	A3D	P04036	C22H32N6O14P2	666.469	666.145	76	80	325.1	-5.13	-1.94	5	12	15	O[C@@H]1[C@H](O)[C@H](O[C@H]1N1C=CCC(=C1)C(=O)C)COP(OP(OC[C@H]1O[C@H]([C@@H]([C@@H]1O)O)n1cnc2c1ncnc2N)(O)O)(O)O	0	C304H107N92O86S+8	test
1dth	general	Protein-Ligand	2	IC50=6nM	IC50	8.22	1997	atrolysin c	BAT	P15167	C23H31N3O4S2	477.64	477.176	63	64	161.07	3.55	4.27	4	4	16	CNC(=O)[C@@H](NC(=O)[C@@H]([C@@H](C(=O)NO)CSc1cccs1)CC(C)C)Cc1ccccc1	1	C244H86N68O77S5Zn+7	train
1dtq	general	Protein-Ligand	2.8	IC50=6nM	IC50	8.22	2000	hiv-1 reverse transcriptase, a-chain	FPT	P04585	C16H16FN5OS	345.395	345.106	40	41	114.95	1.87	2.88	2	3	8	CCOc1ccnc(c1F)CCNC(=S)Nc1ccc(cn1)C#N	0	C315H88N75O82S+8	train
1dtt	general	Protein-Ligand	3	IC50=5nM	IC50	8.3	2000	hiv-1 reverse transcriptase, a-chain	FTC	P04585	C15H16ClFN4OS	354.83	354.072	39	40	91.16	2.78	3.66	2	2	8	CCOc1ccnc(c1F)CCNC(=S)Nc1ccc(cn1)Cl	0	C308H84N74O80S+8	test
1dub	general	Protein-Ligand	2.5	Ki=1.6uM	Ki	5.8	1997	2-enoyl-coa hydratase	CAA	P14604	C25H43N7O18P3S	854.631	854.16	97	99	456.25	-6.11	-1.31	5	16	25	O=C(NCCSC(=O)CC(=O)C)CCNC(=O)[C@@H](C(COP(OP(OC[C@H]1O[C@H]([C@@H]([C@@H]1OP(O)(O)O)O)n1cnc2c1ncnc2N)(O)O)(O)O)(C)C)O	0	C262H81N77O79S3+8	train
1dud	refined	Protein-Ligand	2.3	Ki=15uM	Ki	4.82	1996	deoxyuridine 5'-triphosphate nucleotidohydrolase	DUD	P06968	C9H16N2O11P2	390.178	390.023	40	41	231.11	-4.31	-2.47	2	8	6	O[C@H]1C[C@@H](O[C@@H]1COP(OP(O)(O)O)(O)O)n1ccc(=O)[nH]c1=O	0	C244H80N65O70S4+4	test
1duv	refined	Protein-Ligand	1.7	Kd=1.6pM	Kd	11.8	2000	ornithine transcarbamoylase	PSQ	P04391	C5H18N4O6PS	293.258	293.068	35	34	227.89	-4.67	0.33	4	6	6	OC(=O)[C@H](CCCN[P@@](=O)(NS(O)(O)O)N)[NH3+]	0	C332H122N97O97S6+9	train
1dwc	general	Protein-Ligand	3	Ki=39nM	Ki	7.41	1994	thrombin alpha	MIT	P28508 P00734	C23H37N6O5S	509.642	509.255	72	74	190.2	4.33	1.73	2	5	9	C[C@@H]1CCN([C@H](C1)C(=O)O)C(=O)[C@@H](NS(=O)(=O)c1cccc2c1NC[C@H](C2)C)CCC[NH+]=C(N)N	0	C343H108N88O95S6+7	valid
1dwd	general	Protein-Ligand	3	Ki=6.6nM	Ki	8.18	1994	thrombin alpha	MID	P28508 P00734	C27H32N5O4S	522.639	522.218	69	72	155.57	4.64	2.82	2	4	11	O=C(N[C@@H](C(=O)N1CCCCC1)Cc1ccc(cc1)C(=[NH2+])N)CNS(=O)(=O)c1ccc2c(c1)cccc2	0	C319H101N85O93S5+7	train
1dx6	general	Protein-Ligand	2.3	IC50=652nM	IC50	6.19	2000	acetylcholinesterase	GNT	P04058	C17H22NO3	288.361	288.16	43	46	43.13	1.84	2	2	1	2	COc1ccc2c3c1O[C@@H]1[C@@]3(CC[N@H+](C2)C)C=C[C@@H](C1)O	0	C378H112N84O100S3+	valid
1dy4	refined	Protein-Ligand	1.9	Ki=44uM	Ki	4.36	2000	cellobiohydrolase i	SNP	P62694	C16H20NO2	258.335	258.149	39	41	46.07	2.65	1.31	2	1	7	O[C@H](COc1cccc2c1cccc2)C[NH2+]C1CC1	0	C328H103N81O94S7+5	train
1dzj	general	Protein-Ligand	2	IC50=1.3uM	IC50	5.89	2000	odorant-binding protein	SES	P81245	C10H18N2S	198.328	198.119	31	31	67.15	3.53	3.6	1	1	5	CCCCc1nc(sc1CCC)N	0	C343H96N75O86S2+3	valid
1dzk	refined	Protein-Ligand	1.48	Kd=0.8uM	Kd	6.1	2000	odorant-binding protein	PRZ	P81245	C9H14N2O	166.22	166.111	26	26	35.01	1.71	1.68	0	2	3	COc1nccnc1CC(C)C	0	C329H107N73O81S2+2	train
1dzm	general	Protein-Ligand	1.93	IC50=3.9uM	IC50	5.41	2000	odorant-binding protein	BZM	P81245	C14H12O2	212.244	212.084	28	29	26.3	3.27	3.04	0	1	4	O=C(c1ccccc1)OCc1ccccc1	0	C361H105N80O92S2+3	valid
1dzp	general	Protein-Ligand	1.83	IC50=3.6uM	IC50	5.44	2000	odorant-binding protein	BZQ	P81245	C13H10O	182.218	182.073	24	25	17.07	3.26	2.92	0	1	2	O=C(c1ccccc1)c1ccccc1	0	C316H101N68O80S2+2	train
1e00	general	Protein-Ligand	1.83	IC50=0.8uM	IC50	6.1	2000	odorant-binding protein	DHM	P81245	C10H22O	158.281	158.167	33	32	20.23	3.29	2.97	1	1	6	CC[C@@H](CCCC(O)(C)C)C	0	C331H104N70O83S2+2	train
1e02	general	Protein-Ligand	2.15	IC50=0.7uM	IC50	6.15	2000	odorant-binding protein	UNA	P81245	C11H22O	170.292	170.167	34	33	17.07	4.34	3.72	0	1	9	CCCCCCCCCCC=O	0	C351H110N78O89S2+3	train
1e03	general	Protein-Ligand	2.9	Kd=0.4nM	Kd	9.4	2000	antithrombin-iii	NTP	P01008	C36H60O55S9	1661.41	1659.94	160	164	860.87	-9.69	0.36	9	31	44	CO[C@@H]1[C@@H](OC)[C@H](O[C@@H]2[C@@H](COS(=O)(=O)O)O[C@@H]([C@@H]([C@H]2OS(=O)(=O)O)OS(=O)(=O)O)O[C@@H]2[C@@H](O[C@H]([C@@H]([C@H]2OC)OS(=O)(=O)O)O[C@@H]2[C@@H](COS(=O)(=O)O)O[C@@H]([C@@H]([C@H]2OS(=O)(=O)O)OS(=O)(=O)O)OC)C(=O)O)O[C@@H]([C@H]1O[C@H]1O[C@H](COS(=O)(=O)O)[C@H]([C@@H]([C@H]1OS(=O)(=O)O)OC)OC)C(=O)O	0	C180H63N53O57S+9	train
1e06	general	Protein-Ligand	2.12	IC50=2.5uM	IC50	5.6	2000	odorant-binding protein	IPB	P81245	C10H14O	150.218	150.104	25	25	20.23	3.06	2.82	1	1	2	Cc1ccc(c(c1)O)C(C)C	0	C322H95N70O78S2+2	train
1e1v	refined	Protein-Ligand	1.95	Ki=12uM	Ki	4.92	2001	cyclin dependent kinase 2	CMG	P24941	C12H17N5O	247.296	247.143	35	37	89.71	2.43	2.48	2	3	3	Nc1nc(OCC2CCCCC2)c2c(n1)[nH]cn2	0	C306H86N69O78+9	valid
1e1x	refined	Protein-Ligand	1.85	Ki=1.3uM	Ki	5.89	2001	cyclin dependent kinase 2	NW1	P24941	C11H17N5O2	251.285	251.138	35	36	116.48	2.11	3.16	2	3	3	O=Nc1c(OCC2CCCCC2)nc(nc1N)N	0	C278H83N68O76+8	train
1e1y	general	Protein-Ligand	2.23	IC50=2.5uM	IC50	5.6	2000	glycogen phosphorylase	CPB	P00489	C21H21ClNO5	402.848	402.111	49	52	95.34	3.25	3.46	4	4	5	C[N@H+]1CC[C@@H]([C@@H](C1)O)c1c(O)cc(c2c1oc(cc2=O)c1ccccc1Cl)O	0	C195H67N53O52S2+6	valid
1e2k	refined	Protein-Ligand	1.7	Ki=11.4uM	Ki	4.94	2000	thymidine kinase	TMC	P0DTH5	C12H16N2O4	252.266	252.111	34	36	95.32	-0.47	-0.85	3	4	4	Cc1cn([C@H]2C[C@@H]([C@]3([C@@H]2C3)CO)O)c(=O)[nH]c1=O	0	C313H100N89O80S8+7	train
1e2l	refined	Protein-Ligand	2.4	Ki=51.5uM	Ki	4.29	2000	thymidine kinase	TMC	P0DTH5	C12H16N2O4	252.266	252.111	34	36	95.32	-0.47	-0.85	3	4	4	Cc1cn([C@H]2C[C@@H]([C@]3([C@@H]2C3)CO)O)c(=O)[nH]c1=O	0	C302H101N86O76S8+7	train
1e34	general	Protein-Ligand	1.8	Ki=1.32mM	Ki	2.88	2000	elastase	TPX	P00772	C14H19NO5S	313.369	313.098	40	40	108.92	2.35	2.67	1	5	7	CC[C@@H]([C@H](C(=O)O)CNS(=O)(=O)c1ccc(cc1)C)C=O	0	C223H85N63O71S4+3	test
1e37	general	Protein-Ligand	1.75	Ki=0.20mM	Ki	3.7	2000	elastase	TPY	P00772	C13H16N2O7S	344.34	344.068	39	39	154.74	1.81	2.79	1	7	7	CC[C@@H]([C@H](C(=O)O)CNS(=O)(=O)c1ccc(cc1)N(=O)=O)C=O	0	C198H78N55O60S4+3	train
1e3g	refined	Protein-Ligand	2.4	Kd=0.99nM	Kd	9	2001	Ligand-binding Domain (LBD) of human Androgen Receptor	R18	P10275	C19H24O2	284.393	284.178	45	48	37.3	2.08	3.72	1	2	1	O=C1CCC2=C3C=C[C@]4([C@H]([C@@H]3CCC2=C1)CC[C@]4(C)O)C	0	C353H107N85O85S7+5	train
1e3v	refined	Protein-Ligand	2	Kd=45.74uM	Kd	4.34	2001	steroid delta-isomerase	DXC	P07445	C24H40O4	392.572	392.293	68	71	77.76	6.36	4.48	2	4	5	O[C@@H]1CC[C@]2([C@@H](C1)CC[C@@H]1[C@@H]2C[C@H](O)[C@]2([C@H]1CC[C@@H]2[C@@H](CCC(=O)O)C)C)C	0	C293H85N70O72S5+4	valid
1e4h	refined	Protein-Ligand	1.8	Kd=3.9nM	Kd	8.41	2000	transthyretin	PBR	P02766	C6HBr5O	488.592	483.594	13	13	20.23	5.02	5.2	1	1	1	Brc1c(O)c(Br)c(c(c1Br)Br)Br	0	C216H88N50O73+2	test
1e55	general	Protein-Ligand	2	Ki=76uM	Ki	4.12	2000	beta-glucosidase	2-mer	P49235	C14H17NO7	311.287	311.101	39	40	143.4	-0.92	-1.23	5	6	9	OC[C@H]1O[C@@H](O[C@@H](c2ccc(cc2)O)C#N)[C@@H]([C@H]([C@@H]1O)O)O	0	C370H124N94O100S+5	train
1e5a	general	Protein-Ligand	1.8	Kd=23nM	Kd	7.64	2000	transthyretin	TBP	P02766	C6H3Br3O	330.799	327.773	13	13	20.23	3.64	3.68	1	1	1	Brc1cc(Br)c(c(c1)Br)O	0	C215H75N45O62+2	test
1e5j	refined	Protein-Ligand	1.85	Ki=100uM	Ki	4	2001	endoglucanase	4-mer	O85465	C25H44O19S2	712.735	712.192	90	93	368.97	-6.89	-7.66	13	13	24	OC[C@H]1O[C@@H](O[C@@H]2[C@@H](CO)O[C@H]([C@@H]([C@H]2O)O)OC)[C@@H]([C@H]([C@@H]1S[C@H]1O[C@H](CO)[C@H]([C@@H]([C@H]1O)O)S[C@@H]1O[C@H](CO)[C@H]([C@@H]([C@H]1O)O)O)O)O	0	C296H103N83O98+3	train
1e66	refined	Protein-Ligand	2.1	Ki=0.13nM	Ki	9.89	2001	acetylcholinesterase	HUX	P04058	C18H19ClN2	298.81	298.124	40	43	38.91	4.09	5.44	1	1	1	CCC1=C[C@H]2C[C@@H](C1)c1c(C2)nc2c(c1N)ccc(c2)Cl	0	C374H111N82O97S2+3	test
1e6q	refined	Protein-Ligand	1.35	Ki=0.7mM	Ki	3.15	2001	myrosinase	NTZ	P29736	C6H11N4O4	203.176	203.078	25	26	127.42	-2.26	-2.81	5	6	5	OC[C@@H]1[C@@H](O)[C@H](O)[C@H](c2n1[nH]nn2)O	0	C277H100N73O77S+6	valid
1e6s	refined	Protein-Ligand	1.35	Ki=0.6mM	Ki	3.22	2000	myrosinase	GOX	P29736	C6H12N2O5	192.17	192.075	25	25	125.54	-1.8	-2.85	6	5	6	OC[C@H]1N/C(=N/O)/[C@@H]([C@H]([C@@H]1O)O)O	0	C277H98N73O76S+6	test
1e72	general	Protein-Ligand	1.6	Ki=0.6mM	Ki	3.22	2001	myrosinase	GOX	P29736	C6H13N2O5	193.178	193.082	26	26	127.15	-2.3	-4.77	5	5	6	OC[C@H]1N/C(=[NH+]\O)/[C@@H]([C@H]([C@@H]1O)O)O	0	C284H102N69O77S+5	test
1e8h	general	Protein-Ligand	2.6	Kd=2.1uM	Kd	5.68	2000	vanillyl-alcohol oxidase	ADP	P56216	C10H17N5O10P2	429.217	429.045	44	46	266.1	-4.89	-2.04	3	10	7	O[C@@H]1[C@@H](COP(OP(O)(O)O)(O)O)O[C@H]([C@@H]1O)n1cnc2c1ncnc2N	0	C367H106N100O101S4+6	train
1e9h	general	Protein-Ligand	2.5	IC50=35nM	IC50	7.46	2001	cell division protein kinase 2	INR	P20248 P24941	C16H12N2O5S	344.342	344.047	36	39	144.19	1.15	3.52	2	5	0	O=C1Nc2c(/C/1=C/1\Nc3c(C1=O)cccc3)cc(cc2)S(O)(O)O	0	C291H84N69O71+8	valid
1eas	general	Protein-Ligand	1.8	Ki=18nM	Ki	7.74	1995	elastase	TFK	P00772	C20H25F3N4O5S	490.497	490.15	58	59	137.91	2.17	3.39	4	5	11	CNS(=O)(=O)Nc1ccc(n(c1=O)CC(=O)N[C@H]([C@@H](C(F)(F)F)O)C(C)C)c1ccccc1	0	C226H85N67O72S5+4	train
1eat	general	Protein-Ligand	2	Ki=15nM	Ki	7.82	1995	elastase	TFI	P00772	C19H24F3N5O5S	491.485	491.145	57	58	164.79	0.85	3.05	4	5	10	O=C(Cn1c(ncc(c1=O)NS(=O)(=O)C)c1ccc(cc1)N)N[C@H]([C@@H](C(F)(F)F)O)C(C)C	0	C247H91N70O76S5+4	train
1eb1	general	Protein-Ligand	1.8	Ki=37pM	Ki	10.43	2002	thrombin heavy chain	10-mer	P00734	C56H77N10O20	1210.27	1209.53	163	166	478.69	3.73	0	9	20	39	CC[C@@H]([C@@H](C(=O)N1CCC[C@H]1C(=O)N[C@H](C(=O)N[C@H](C(=O)N[C@H](C(=O)N[C@H](C(=O)O)Cc1ccccc1)C)CCC(=O)O)CCC(=O)O)NC(=O)[C@@H]1CCCN1C(=O)[C@@H](NC(=O)[C@@H](NC(=O)[C@H](CC(=O)O)[NH3+])Cc1ccc(cc1)O)CCC(=O)O)C	0	C180H52N53O49S+8	train
1eb2	refined	Protein-Ligand	2	Ki=980nM	Ki	6.01	2002	trypsin	BPO	P00760	C28H29N4O3	469.555	469.224	64	67	118.09	5.05	2.77	1	3	9	O=C([C@@H](c1ccccc1)NC(=O)c1cccc(c1)C(=[NH2+])N)N1CC[C@H](CC1)C(=O)c1ccccc1	0	C293H104N75O90S5+4	train
1ebg	general	Protein-Ligand	2.1	Ki=15pM	Ki	10.82	1995	enolase	PAH	P00924	C2H7NO5P	156.054	156.006	16	15	123.61	-2.91	-1.38	2	5	3	ONC(=O)CP(O)(O)O	1	C200H100Mg2N65O79S3+6	train
1ebw	refined	Protein-Ligand	1.81	Ki=0.90nM	Ki	9.05	2002	hiv-1 protease	BEI	P03366	C34H52N4O8	644.799	644.379	98	99	175.32	2.38	3.07	6	6	25	CC[C@@H]([C@@H](C(=O)NC)NC(=O)[C@@H]([C@@H]([C@H]([C@H](C(=O)N[C@H](C(=O)NC)[C@H](CC)C)OCc1ccccc1)O)O)OCC1=CCC=CC1)C	0	C366H116N97O104S2+6	valid
1eby	refined	Protein-Ligand	2.29	Ki=0.20nM	Ki	9.7	2002	hiv-1 protease	BEB	P03366	C38H40N2O8	652.733	652.278	88	93	157.58	3.44	3.21	6	6	19	O=C([C@@H]([C@@H]([C@H]([C@H](C(=O)N[C@@H]1[C@H](O)Cc2c1cccc2)OCc1ccccc1)O)O)OCc1ccccc1)N[C@@H]1[C@H](O)Cc2c1cccc2	0	C360H113N95O99S2+6	train
1ebz	refined	Protein-Ligand	2.01	Ki=0.40nM	Ki	9.4	2002	hiv-1 protease	BEC	P03366	C35H43N3O8	633.731	633.305	89	92	166.45	2.65	2.71	6	6	21	CNC(=O)[C@H](C(C)C)NC(=O)[C@@H]([C@@H]([C@H]([C@H](C(=O)N[C@@H]1[C@H](O)Cc2c1cccc2)OCc1ccccc1)O)O)OCc1ccccc1	0	C358H112N95O100S2+6	train
1ec1	refined	Protein-Ligand	2.1	Ki=1.20nM	Ki	8.92	2002	hiv-1 protease	BEE	P03366	C40H50N4O8S2	778.977	778.307	104	107	231.8	4.48	5.67	6	6	25	CNC(=O)[C@H](C(C)C)NC(=O)[C@@H]([C@@H]([C@H]([C@H](C(=O)N[C@H](C(=O)NC)C(C)C)OCc1ccc(cc1)c1cscc1)O)O)OCc1ccc(cc1)c1cscc1	0	C368H121N98O107S2+6	train
1ec2	refined	Protein-Ligand	2	Ki=0.10nM	Ki	10	2002	hiv-1 protease	BEJ	P03366	C42H52N6O8	768.898	768.385	108	111	201.1	2.98	4.34	6	8	25	CNC(=O)[C@H](C(C)C)NC(=O)[C@@H]([C@@H]([C@H]([C@H](C(=O)N[C@H](C(=O)NC)C(C)C)OCc1ccc(cc1)c1cccnc1)O)O)OCc1ccc(cc1)c1cccnc1	0	C341H112N92O97S2+6	valid
1ec9	refined	Protein-Ligand	2	Ki=0.8mM	Ki	3.1	2000	glucarate dehydratase	XYH	P0AES2	C5H9NO7	195.127	195.038	22	21	147.32	-2.36	-2.95	5	7	8	ONC(=O)[C@H]([C@@H]([C@H](C(=O)O)O)O)O	1	C275H117MgN82O86S2+8	train
1ecq	refined	Protein-Ligand	2	Ki=1.0mM	Ki	3	2000	glucarate dehydratase	DXG	P0AES2	C6H10O7	194.139	194.043	23	22	135.29	-0.38	-2.37	3	7	6	OC(=O)[C@H](C[C@@H]([C@H](C(=O)O)O)O)O	1	C261H104MgN76O79S2+6	train
1ecv	refined	Protein-Ligand	1.95	Ki=14uM	Ki	4.85	2000	tyrosine phosphatase 1b	878	P18031	C9H6INO5	335.052	334.929	22	22	103.7	3.52	1.09	1	5	2	Ic1ccc(c(c1)C(=O)O)NC(=O)C(=O)O	0	C205H69N66O61S2+8	test
1eed	general	Protein-Ligand	2	Ki=16.2uM	Ki	4.79	1994	endothiapepsin	0EO	P11838	C34H55N3O8	633.816	633.399	100	101	174.29	5.93	5.26	5	7	23	CC(C[C@@H](C(=O)O)NC(=O)C[C@@H]([C@@H](NC(=O)CC[C@@H]([C@H](Cc1ccccc1)NC(=O)OC(C)(C)C)O)CC1CCCCC1)O)C	0	C364H126N83O124	test
1eef	general	Protein-Ligand	1.8	IC50=1.2mM	IC50	2.92	2000	heat-labile enterotoxin b chain	2-mer	P32890	C22H24N2O8	444.435	444.153	56	59	154.24	0.42	-0.89	5	6	10	OC[C@H]1O[C@H](Oc2ccc3c(c2)c(=O)n([nH]c3=O)CCc2ccccc2)[C@@H]([C@H]([C@H]1O)O)O	0	C204H66N61O66S2+5	train
1eei	general	Protein-Ligand	2	IC50=0.7mM	IC50	3.15	2000	cholera toxin b	GAA	Q57193	C12H15NO8	301.249	301.08	36	37	145.2	-0.41	-0.7	4	6	7	OC[C@H]1O[C@H](Oc2cccc(c2)N(=O)=O)[C@@H]([C@H]([C@H]1O)O)O	0	C184H55N56O56+5	valid
1efi	general	Protein-Ligand	1.6	IC50=12mM	IC50	1.92	2000	heat-labile enterotoxin b chain	GAT	P32890	C12H17NO6	271.266	271.106	36	37	125.4	-0.92	-0.97	5	4	7	OC[C@H]1O[C@H](Oc2ccc(cc2)N)[C@@H]([C@H]([C@H]1O)O)O	0	C160H58N48O51S2+3	valid
1efy	refined	Protein-Ligand	2.2	Ki=6nM	Ki	8.22	2001	adp-ribose polymerase	BZC	P26446	C15H13N3O2	267.283	267.101	33	35	81	2	3.04	2	2	3	COc1cccc(c1)c1nc2c([nH]1)cccc2C(=O)N	0	C298H93N77O78S4+7	train
1egh	refined	Protein-Ligand	2	Ki=2uM	Ki	5.7	2000	methylglyoxal synthase	PGA	P0A731	C2H6O6P	157.039	156.99	15	14	120.81	-1.24	-1.26	0	5	1	OC(=O)COP(O)(O)O	0	C237H76N60O65S3+2	train
1eix	general	Protein-Ligand	2.5	Ki=8.8pM	Ki	11.06	2000	orotidine 5'-monophosphate decarboxylase	BMQ	P08244	C9H14N2O10P	341.189	341.039	36	37	208.29	-4.26	-3.47	4	8	6	O[C@@H]1[C@H](O)[C@H](O[C@H]1n1c(O)cc(=O)[nH]c1=O)COP(O)(O)O	0	C322H110N92O93S6+8	train
1ejn	refined	Protein-Ligand	1.8	Ki=2.4uM	Ki	5.62	2000	urokinase-type plasminogen activator	AGB	P00749	C19H28N5O	342.459	342.229	53	56	107.14	4.12	2.62	2	1	6	O=C(N[C@]12C[C@H]3C[C@@H](C2)C[C@@H](C1)C3)NCc1ccc(cc1)[NH+]=C(N)N	0	C303H110N78O87S4+8	train
1ek2	general	Protein-Ligand	3	Ki=6.3nM	Ki	8.2	2000	epoxide hydrolase	CDU	P34914	C17H34N2O	282.465	282.267	54	54	41.13	5.68	5.54	2	1	12	CCCCCCCCCCNC(=O)NC1CCCCC1	0	C395H140N91O102S5+6	train
1ekb	general	Protein-Ligand	2.3	Ki=1.0uM	Ki	6	1999	enteropeptidase	7-mer	P98072	C18H33N5O10	479.482	479.223	66	65	274.71	-4.8	-3.95	6	10	18	[NH3+]CCCC[C@H](NC(=O)[C@@H](NC(=O)[C@@H](NC(=O)[C@H](CC(=O)O)[NH3+])CC(=O)O)CC(=O)O)CO	0	C259H78N75O77S5+7	test
1ela	refined	Protein-Ligand	1.8	Ki=0.44uM	Ki	6.36	1994	elastase	0Z1	P00772	C22H32F3N4O3	457.51	457.243	64	65	106.15	2.9	2.6	3	3	12	[NH3+]CCCC[C@@H](C(=O)N1CCC[C@H]1C(=O)Nc1ccc(cc1)C(C)C)NC(=O)C(F)(F)F	0	C261H87N74O84S5+5	test
1elb	refined	Protein-Ligand	2.1	Ki=70nM	Ki	7.15	1994	elastase	0Z4	P00772	C23H36F3N4O3	473.552	473.274	69	69	114.94	3.92	3.59	4	3	15	[NH3+]CCCC[C@@H](C(=O)N[C@H](C(=O)Nc1ccc(cc1)C(C)C)CC(C)C)NC(=O)C(F)(F)F	0	C263H94N77O84S5+5	train
1elc	refined	Protein-Ligand	1.75	Ki=0.22uM	Ki	6.66	1994	elastase	0Z3	P00772	C26H34F3N4O3	507.568	507.258	70	71	114.94	4.19	3.79	4	3	15	[NH3+]CCCC[C@@H](C(=O)N[C@H](C(=O)Nc1ccc(cc1)C(C)C)Cc1ccccc1)NC(=O)C(F)(F)F	0	C248H85N75O81S4+5	test
1eld	refined	Protein-Ligand	1.8	Ki=0.20uM	Ki	6.7	1995	elastase	0Z0	P00772	C21H19F6N3O3	475.384	475.133	52	53	87.3	4.18	4.29	3	3	10	C[C@@H](C(=O)Nc1ccc(cc1)C(F)(F)F)NC(=O)[C@H](Cc1ccccc1)NC(=O)C(F)(F)F	0	C239H92N66O76S4+3	train
1ele	refined	Protein-Ligand	1.8	Ki=0.14uM	Ki	6.85	1995	elastase	0QN	P00772	C17H19F6N3O3	427.341	427.133	48	48	87.3	3.56	3.71	3	3	9	C[C@@H](C(=O)Nc1ccc(cc1)C(F)(F)F)NC(=O)[C@H](C(C)C)NC(=O)C(F)(F)F	0	C238H94N66O79S5+4	train
1elr	refined	Protein-Ligand	1.9	Kd=11uM	Kd	4.96	2000	tpr2a-domain of hop	6-mer	P31948 Q9H2A1	C26H41N5O13S	663.694	663.242	86	85	320	3.45	0.08	5	13	23	CSCC[C@@H](C(=O)N[C@H](C(=O)N[C@H](C(=O)N[C@H](C(=O)N[C@H](C(=O)O)CC(=O)O)C(C)C)CCC(=O)O)CCC(=O)O)NC(=O)C	0	C300H100N81O82S4+12	test
1els	general	Protein-Ligand	2.4	Ki=15pM	Ki	10.82	1994	enolase	PAH	P00924	C2H7NO5P	156.054	156.006	16	15	123.61	-2.91	-1.38	2	5	3	ONC(=O)CP(O)(O)O	1	C176H87Mn2N62O76S2+6	train
1em6	general	Protein-Ligand	2.2	IC50=6nM	IC50	8.22	2000	glycogen phosphorylase	CP4	P06737	C24H24Cl2N4O4	503.378	502.117	58	61	108.24	4.05	4.93	4	2	13	Clc1ccc2c(c1)cc([nH]2)C(=O)NCCOCCOCCNC(=O)c1cc2c([nH]1)ccc(c2)Cl	0	C496H158N141O123S+19	train
1ent	general	Protein-Ligand	1.9	Ki=110nM	Ki	6.96	1994	endothiapepsin	0EM	P11838	C32H52N6O7P	663.765	663.364	98	99	208.36	3.24	4.62	5	7	23	CC[C@@H](CNC(=O)CP([C@@H](NC(=O)[C@H](Cc1cnc[nH]1)NC(=O)[C@H](Cc1ccccc1)NC(=O)OC(C)(C)C)CC(C)C)(O)O)C	0	C360H124N81O122	train
1enu	refined	Protein-Ligand	1.95	Ki=8.3uM	Ki	5.08	2000	trna guanine transglycosylase	APZ	P28720	C8H7N3O2	177.16	177.054	20	21	91.74	-0.24	0.38	3	2	0	Nc1ccc2c(c1)c(=O)[nH][nH]c2=O	0	C217H77N57O72S5+	train
1eoc	refined	Protein-Ligand	2.25	Ki=0.9uM	Ki	6.05	2000	protocatechuate 3,4-dioxygenase alpha chain	4NC	P20371 P20372	C6H5NO4	155.108	155.022	16	16	86.28	1.04	1.53	2	4	2	O=N(=O)c1ccc(c(c1)O)O	1	C249H83FeN73O67S+7	train
1eou	general	Protein-Ligand	2.1	IC50=36nM	IC50	7.44	2002	carbonic anhydrase ii	SMS	P00918	C9H15NO10S2	361.346	361.014	37	39	166.44	-1.78	0.98	1	4	3	NS(=O)(=O)OC[C@]12OC[C@@H]3[C@H]([C@@H]2OC(O1)(C)C)OS(=O)(=O)O3	1	C300H92N72O62S2Zn+4	train
1epo	refined	Protein-Ligand	2	Ki=11nM	Ki	7.96	1994	endothiapepsin	2Z3	P11838	C32H49F2N5O7	653.758	653.36	95	97	169.33	3.45	3.33	6	6	22	CCCC[C@@H](C(=O)N[C@H](C(C(C(=O)NC)(F)F)(O)O)CC1CCCCC1)NC(=O)[C@@H](NC(=O)N1CCOCC1)Cc1ccccc1	0	C351H130N78O123S2	train
1epp	general	Protein-Ligand	1.9	Ki=69nM	Ki	7.16	1994	endothiapepsin	1Z1	P11838	C32H57N7O6S2	699.968	699.381	104	104	221.47	2.84	4.61	7	6	28	CC[C@@H](CNC(=O)C[C@@H]([C@@H](NC(=O)[C@@H](NC(=O)[C@@H](NS(=O)(=O)N(C)C)Cc1ccccc1)CCCCNC(=S)NC)CC(C)C)O)C	0	C374H132N85O125	train
1erb	refined	Protein-Ligand	1.9	Kd=8nM	Kd	8.1	1994	retinoic acid receptor rxr-alpha	ETR	P18902	C22H33NO	327.504	327.256	57	57	29.1	6.05	6.05	1	1	7	CCNC(=O)/C=C(/C=C/C=C(/C=C/C1=C(C)CCCC1(C)C)\C)\C	0	C368H105N92O96S3+8	train
1ero	general	Protein-Ligand	2.1	Ki=5.9nM	Ki	8.23	2000	beta-lactamase tem	BJP	P62593	C17H18BNO5	327.14	327.128	42	43	106.86	2.71	1.48	3	5	9	O=C(Cc1ccccc1)N[C@H](B(O)O)Cc1cccc(c1)C(=O)O	0	C226H76N65O76S4+6	train
1erq	general	Protein-Ligand	1.9	Ki=13nM	Ki	7.89	2000	beta-lactamase tem	BJH	P62593	C11H14BNO6	267.043	267.091	33	33	127.09	1.31	-0.04	4	6	8	CC(=O)N[C@H](B(O)O)Cc1cccc(c1O)C(=O)O	0	C226H77N65O74S4+5	valid
1err	general	Protein-Ligand	2.6	IC50=7.7nM	IC50	8.11	1998	human estrogen receptors (ER) alpha LBD	RAL	P03372	C28H28NO4S	474.591	474.174	62	66	99.44	6.09	6.23	3	3	9	Oc1ccc2c(c1)sc(c2C(=O)c1ccc(cc1)OCC[NH+]1CCCCC1)c1ccc(cc1)O	0	C382H108N85O97S10+6	train
1ets	general	Protein-Ligand	2.3	Ki=6nM	Ki	8.22	1994	thrombin alpha	MID	P00735	C27H32N5O4S	522.639	522.218	69	72	155.57	4.64	2.82	2	4	11	O=C(N[C@@H](C(=O)N1CCCCC1)Cc1ccc(cc1)C(=[NH2+])N)CNS(=O)(=O)c1ccc2c(c1)cccc2	0	C330H106N86O98S6+7	train
1ett	general	Protein-Ligand	2.5	Ki=1.3uM	Ki	5.89	1994	thrombin alpha	4QQ	P00735	C22H29N4O3S	429.556	429.196	59	61	126.47	4.4	2.47	1	3	8	Cc1ccc(cc1)S(=O)(=O)N[C@H](C(=O)N1CCCCC1)Cc1ccc(cc1)C(=[NH2+])N	0	C308H108N76O86S4+6	train
1etz	general	Protein-Ligand	2.6	Kd=58nM	Kd	7.24	2000	antibody fab fragment	GAS	P01867 G0YP42	C23H21N4O2	385.438	385.166	50	52	99.12	4.47	2.33	0	3	5	N#Cc1ccc(cc1)N/C(=[NH+]/C(c1ccccc1)c1ccccc1)/NCC(=O)O	0	C271H66N61O69S+4	valid
1eub	general	Protein-Ligand	NMR	Ki=1.9nM	Ki	8.72	2001	collagenase 3 (mmp-13)	3-mer	P45452	C18H23N3O5S	393.457	393.136	50	51	117.21	1.69	3.28	2	5	10	ONC(=O)[C@H](N(S(=O)(=O)c1ccc(cc1)OC)Cc1cccnc1)C(C)C	1	C250H86CaN64O65SZn+7	train
1eve	general	Protein-Ligand	2.5	IC50=5.7nM	IC50	8.24	1999	acetylcholinesterase	E20	P04058	C24H30NO3	380.5	380.223	58	61	39.97	4.28	4.51	1	1	6	COc1cc2c(cc1OC)C[C@H](C2=O)C[C@@H]1CC[N@H+](CC1)Cc1ccccc1	0	C413H117N91O114S2+	train
1evh	general	Protein-Ligand	1.8	Kd=602uM	Kd	3.22	1999	mena evh1 domain	7-mer	Q03173	C31H41N5O7	595.687	595.301	84	88	147.64	2.21	0.92	1	7	12	CC(=O)N[C@H](C(=O)N1CCC[C@H]1C(=O)N1CCC[C@H]1C(=O)N1CCC[C@H]1C(=O)N1CCC[C@H]1C(=O)O)Cc1ccccc1	0	C169H45N49O46S+6	valid
1ew8	refined	Protein-Ligand	2.2	Ki=5.5mM	Ki	2.26	2002	alkaline phosphatase	PAE	P00634	C2H6O5P	141.04	140.995	14	13	111.58	-1.28	-1.19	0	5	0	OC(=O)CP(O)(O)O	1	C185H83MgN60O73Zn2+5	test
1ew9	refined	Protein-Ligand	2	Ki=0.6mM	Ki	3.22	2002	alkaline phosphatase	MMQ	P00634	CH6O3PS	129.095	128.978	12	11	113.08	-1.38	-0.39	0	3	1	SCP(O)(O)O	1	C161H85MgN53O64Zn2+6	train
1exv	general	Protein-Ligand	2.4	IC50=45nM	IC50	7.35	2000	glycogen phosphorylase	700	P06737	C22H20ClN3O4	425.865	425.114	50	53	102.5	4.31	3.03	2	4	7	OC(=O)[C@@H]1CN(C1)C(=O)[C@@H](NC(=O)c1cc2c([nH]1)ccc(c2)Cl)Cc1ccccc1	0	C397H117N115O92S+15	test
1ez9	refined	Protein-Ligand	1.9	Kd=8uM	Kd	5.1	2002	maltose-binding periplasmic protein	4-mer	P0AEX9	C24H44O21	668.594	668.238	89	91	358.83	-9.5	-10.11	15	15	29	OC[C@H]([C@H]([C@@H]([C@H](CO)O)O)O[C@H]1O[C@H](CO)[C@H]([C@@H]([C@H]1O)O)O[C@H]1O[C@H](CO)[C@H]([C@@H]([C@H]1O)O)O[C@H]1O[C@H](CO)[C@H]([C@@H]([C@H]1O)O)O)O	0	C300H88N74O77S2+4	train
1ezf	general	Protein-Ligand	2.15	IC50=56nM	IC50	7.25	2000	farnesyl-diphosphate farnesyltransferase	IN0	P37268	C30H31ClN2O7	567.029	566.182	71	74	133.24	6.77	5.25	1	6	8	O=C(C[C@H]1O[C@@H](c2c(N(C1=O)CC(C)(C)C)ccc(c2)Cl)c1cccc2c1cccc2)N[C@H](C(=O)O)CC(=O)O	0	C427H132N106O111S7+7	train
1ezq	refined	Protein-Ligand	2.2	Ki=0.9nM	Ki	9.05	2000	coagulation factor xa	RPR	P00742	C27H32N4O3	460.568	460.247	66	68	134.65	4.72	1.8	2	2	11	[NH3+]Cc1cccc(c1)c1ccc(cc1)C(=O)N[C@@H]([C@H](C(=O)OC)Cc1cccc(c1)C(=[NH2+])N)C	0	C285H101N73O90S5+5	valid
1f0q	general	Protein-Ligand	2.63	IC50=1uM	IC50	6	2001	casein kinase ii, alpha subunit	EMO	P28523	C15H10O5	270.237	270.053	30	32	94.83	2.72	1.89	3	5	3	Cc1cc(O)c2c(c1)C(=O)c1c(C2=O)c(O)cc(c1)O	0	C254H82N65O64S2+8	test
1f0r	refined	Protein-Ligand	2.1	Ki=22nM	Ki	7.66	2000	coagulation factor xa	815	P00742	C21H19N5O3S2	453.537	453.093	50	54	154.9	2.28	4.5	2	5	5	O=C1N(CC[C@@H]1NS(=O)(=O)c1sc2c(c1)nccc2)Cc1ccc2c(c1)c(N)ncc2	0	C267H104N72O86S5+6	train
1f0s	refined	Protein-Ligand	2.1	Ki=18nM	Ki	7.74	2000	coagulation factor xa	PR2	P00742	C19H17N5O3S2	427.5	427.077	46	50	144.67	1.54	3.66	2	5	5	O=C1N(CC[C@@H]1NS(=O)(=O)c1sc2c(c1)nccc2)Cc1[nH]c2c(c1)ccnc2	0	C256H101N71O84S5+6	valid
1f0t	refined	Protein-Ligand	1.8	Ki=1000nM	Ki	6	2000	trypsin beta	PR1	P00760	C19H20N5O4S2	446.523	446.096	50	53	187.83	2.88	1.66	2	5	7	O=C1N(CC[C@@H]1NS(=O)(=O)c1cc2c(s1)cccn2)Cc1cc(ccc1O)C(=[NH2+])N	0	C250H93N69O82S6+3	train
1f0u	refined	Protein-Ligand	1.9	Ki=69nM	Ki	7.16	2000	trypsin beta	RPR	P00760	C27H32N4O3	460.568	460.247	66	68	134.65	4.72	1.8	2	2	11	[NH3+]Cc1cccc(c1)c1ccc(cc1)C(=O)N[C@@H]([C@H](C(=O)OC)Cc1cccc(c1)C(=[NH2+])N)C	0	C260H93N71O84S6+3	train
1f1j	general	Protein-Ligand	2.35	Ki=1.6nM	Ki	8.8	2001	caspase-7 protease	5-mer	P55210	C20H32N4O11	504.488	504.207	67	66	248.53	1.57	-1.03	5	11	18	OC[C@@H](NC(=O)[C@H](C(C)C)NC(=O)[C@@H](NC(=O)[C@@H](NC(=O)C)CC(=O)O)CCC(=O)O)CC(=O)O	0	C295H91N86O93S2+7	train
1f28	general	Protein-Ligand	1.9	Ki=16nM	Ki	7.8	2001	thymidylate synthase	F89	P13100	C27H24N4O6	500.503	500.17	61	65	152.69	4.26	3.28	2	6	6	OC(=O)CC[C@H](N1Cc2c(C1=O)ccc(c2)NCc1ccc2c(c1)c1c(cc2)nc([nH]c1=O)C)C(=O)O	0	C383H130N102O104S5+8	train
1f2o	general	Protein-Ligand	1.7	Ki=12.4mM	Ki	1.91	2001	aminopeptidase	LEU	P80561	C6H14NO2	132.181	132.102	23	22	64.94	-0.79	-0.27	1	2	2	[NH3+][C@H](C(=O)O)CC(C)C	1	C216H80N56O76SZn2+3	valid
1f2p	general	Protein-Ligand	1.8	Ki=12.7mM	Ki	1.9	2001	aminopeptidase	PHE	P80561	C9H12NO2	166.197	166.087	24	24	64.94	-0.53	-0.08	1	2	2	[NH3+][C@H](C(=O)O)Cc1ccccc1	1	C198H74N52O69SZn2+4	train
1f3e	refined	Protein-Ligand	1.85	Ki=0.2uM	Ki	6.7	2000	tRNA-guanine transglycosylase	DPZ	P28720	C8H8N4O2	192.175	192.065	22	23	117.76	-0.37	0.54	4	2	0	Nc1cc(N)c2c(c1)c(=O)[nH][nH]c2=O	0	C215H76N55O69S4+	train
1f40	general	Protein-Ligand	NMR	Kd=1uM	Kd	6	2000	fk506 binding protein (fkbp)	GPI	P62942	C20H28N2O4	360.447	360.205	54	55	76.57	3.05	2.49	0	4	10	CCC(C(=O)C(=O)N1CCC[C@H]1C(=O)OCCCc1cccnc1)(C)C	0	C245H76N59O59S2+6	train
1f4e	refined	Protein-Ligand	1.9	Ki=1.1mM	Ki	2.96	2000	thymidylate synthase	TPR	P0A884	C12H15NO4S	269.317	269.072	33	34	83.06	2.44	2.25	0	4	2	OC(=O)[C@H]1CCCN1S(=O)(=O)c1ccc(cc1)C	0	C295H94N75O66S3+4	train
1f4f	refined	Protein-Ligand	2	Ki=24uM	Ki	4.62	2000	thymidylate synthase	TP3	P0A884	C17H20N2O9S	428.414	428.089	49	50	186.76	3.16	1.38	1	9	7	OC(=O)CC[C@@H](C(=O)O)NC(=O)c1ccc(cc1)S(=O)(=O)N1CCC[C@@H]1C(=O)O	0	C300H96N78O81S2+3	test
1f4g	refined	Protein-Ligand	1.75	Ki=330nM	Ki	6.48	2000	thymidylate synthase	TP4	P0A884	C20H25N3O10S	499.492	499.126	59	60	215.86	2.97	1.28	2	10	11	OC(=O)CCNC(=O)[C@H]1CCCN1S(=O)(=O)c1ccc(cc1)C(=O)N[C@H](C(=O)O)CCC(=O)O	0	C312H105N79O75S2+5	train
1f4x	refined	Protein-Ligand	2.3	Kd=2.6uM	Kd	5.59	2000	antibody fab s-20-4	MGS		C12H23NO7	293.314	293.147	43	43	117.48	-1.96	-1.63	4	4	10	OCC[C@H](C(=O)N[C@@H]1[C@@H](C)O[C@@H]([C@H]([C@H]1O)OC)OC)O	0	C223H63N60O61S+5	train
1f4y	general	Protein-Ligand	2.8	Kd=0.83uM	Kd	6.08	2000	antibody fab fragment, light chain	MGU		C22H40N2O13	540.559	540.253	77	78	225.73	-4	-3.52	8	8	20	OCC[C@H](C(=O)N[C@@H]1[C@@H](C)O[C@@H]([C@H]([C@H]1O)OC)O[C@@H]1[C@@H](OC)O[C@@H]([C@H]([C@@H]1O)NC(=O)[C@@H](CCO)O)C)O	0	C243H66N65O67S+4	test
1f57	refined	Protein-Ligand	1.75	Ki=2.3uM	Ki	5.64	2000	carboxypeptidase a	DCY	P00730	C3H8NO2S	122.166	122.028	15	14	103.74	-2.19	-1.39	1	2	2	OC(=O)[C@H]([NH3+])CS	1	C168H72N51O52Zn+4	test
1f5l	refined	Protein-Ligand	2.1	Ki=5.3uM	Ki	5.28	2001	urokinase-type plasminogen activator	AMR	P00749	C6H9ClN7O	230.635	230.056	24	24	160.9	1.4	-0.65	2	3	2	Nc1nc(N)c(nc1C(=O)[NH+]=C(N)N)Cl	0	C219H89N60O66S5+5	valid
1f73	refined	Protein-Ligand	1.95	Ki=4.1mM	Ki	2.39	2000	n-acetyl neuraminate lyase	HMN	P44539	C11H21NO9	311.286	311.122	42	41	187.78	-3.36	-3.85	7	9	15	OC[C@H]([C@H]([C@@H]([C@@H]([C@H](C[C@H](C(=O)O)O)O)NC(=O)C)O)O)O	0	C297H96N64O84S2+2	train
1f74	refined	Protein-Ligand	1.6	Ki=0.9mM	Ki	3.05	2000	n-acetyl neuraminate lyase	NAY	P44539	C11H19NO8	293.27	293.111	39	38	164.39	-2.31	-2.61	5	8	13	OC[C@H]([C@H]([C@@H]([C@H](NC(=O)C)CCC(=O)C(=O)O)O)O)O	0	C286H96N61O80S3+2	test
1f7b	general	Protein-Ligand	1.8	Ki=0.025mM	Ki	4.6	2000	n-acetyl neuraminate lyase	NAV	P44539	C11H19NO8	293.27	293.111	39	38	164.39	-2.34	-2.61	5	8	13	OC[C@H]([C@H]([C@@H]([C@@H](C(=O)CCC(=O)O)NC(=O)C)O)O)O	0	C291H96N59O80S3+2	train
1f8a	general	Protein-Ligand	1.84	Kd=10uM	Kd	5	2000	peptidyl-prolyl cis-trans isomerase	7-mer	Q13526	C32H52N7O19P2	900.738	900.279	112	114	449.67	-8.08	-5.29	8	17	27	OC[C@@H](C(=O)O)NC(=O)[C@@H]1CCCN1C(=O)[C@@H](NC(=O)[C@H]([C@H](O)C)NC(=O)[C@@H]1CCCN1C(=O)[C@@H](NC(=O)[C@H](Cc1ccc(cc1)O)[NH3+])COP(O)(O)O)COP(O)(O)O	0	C274H76N75O76S2+8	train
1f8b	refined	Protein-Ligand	1.8	Ki=4.0uM	Ki	5.4	2001	neuraminidase	DAN	P03472	C11H17NO8	291.255	291.095	37	37	156.55	-1.61	-2.68	5	7	9	OC[C@H]([C@H]([C@@H]1OC(=C[C@@H]([C@H]1NC(=O)C)O)C(=O)O)O)O	0	C271H107N85O87S+8	train
1f8c	refined	Protein-Ligand	1.7	Ki=0.04uM	Ki	7.4	2001	neuraminidase	4AM	P03472	C11H19N2O7	291.278	291.119	39	39	163.96	-4.15	-3.43	5	6	8	OC[C@H]([C@H]([C@@H]1OC(=C[C@@H]([C@H]1NC(=O)C)[NH3+])C(=O)O)O)O	0	C288H112N92O91S+9	train
1f8d	refined	Protein-Ligand	1.4	Ki=400uM	Ki	3.4	2001	neuraminidase	9AM	P03472	C11H19N2O7	291.278	291.119	39	39	163.96	-4.15	-3.43	5	6	8	[NH3+]C[C@H]([C@H]([C@@H]1OC(=C[C@@H]([C@H]1NC(=O)C)O)C(=O)O)O)O	0	C255H110N84O86S+8	test
1f8e	refined	Protein-Ligand	1.4	Ki=15uM	Ki	4.82	2001	neuraminidase	49A	P03472	C11H21N3O6	291.301	291.143	41	41	171.37	-4.41	-4.18	5	5	7	[NH3+]C[C@H]([C@H]([C@@H]1OC(=C[C@@H]([C@H]1NC(=O)C)[NH3+])C(=O)O)O)O	0	C267H113N88O91+8	train
1f90	general	Protein-Ligand	2.6	Kd=11.9nM	Kd	7.92	2001	antibody fab fragment	9-mer		C48H85N11O15	1056.25	1055.62	159	159	434.28	-1.08	0.25	10	15	40	[NH3+]CCCC[C@@H](C(=O)N1CCC[C@H]1C(=O)N[C@H](C(=O)N[C@H](C(=O)N[C@H](C(=O)N[C@H](C(=O)N[C@H](C(=O)N[C@H](C(=O)N[C@H](C(=O)O)CC(C)C)CC(=O)N)CC(C)C)C(C)C)CCC(=O)O)CCC(=O)O)CC(C)C)[NH3+]	0	C292H85N69O83+3	train
1f92	general	Protein-Ligand	2.6	Ki=0.64uM	Ki	6.19	2001	urokinase-type plasminogen activator	UKP	P00749	C32H50N6O4S	614.842	614.361	93	95	174.42	4.84	2.76	2	4	14	[NH3+]CCC(=O)N1CCN(CC1)C(=O)[C@@H](NS(=O)(=O)c1c(cc(cc1C(C)C)C(C)C)C(C)C)Cc1cccc(c1)C(=[NH2+])N	0	C282H104N74O84S5+6	train
1f9e	general	Protein-Ligand	2.9	Ki=2nM	Ki	8.7	2001	caspase-8 alpha chain	5-mer	Q14790	C26H34N4O12	594.568	594.217	76	76	254.6	3.65	0.97	4	11	20	O=C[C@@H](NC(=O)[C@H](C(C)C)NC(=O)[C@@H](NC(=O)[C@H](NC(=O)OCc1ccccc1)CC(=O)O)CCC(=O)O)CC(=O)O	0	C256H82N80O84S3+8	train
1f9g	general	Protein-Ligand	2	Ki=53mM	Ki	1.28	2001	hyaluronate lyase	ASC	Q54873	C6H8O6	176.124	176.032	20	20	107.22	-1.28	-1.41	4	5	6	OC[C@H]([C@H]1OC(=O)C(=C1O)O)O	0	C187H77N56O56S+6	train
1fao	refined	Protein-Ligand	1.8	Kd=0.043uM	Kd	7.37	2000	dual adaptor of phosphotyrosine and 3 phosphoinositides	4IP	Q9UN19	C6H20O18P4	504.107	503.96	48	48	374.5	-8.74	-5.12	2	14	6	O[C@@H]1[C@H](OP(O)(O)O)[C@@H](OP(O)(O)O)[C@@H]([C@H]([C@@H]1OP(O)(O)O)O)OP(O)(O)O	0	C174H40N43O33+7	train
1fax	general	Protein-Ligand	3	Ki=41nM	Ki	7.39	1997	coagulation factor xa	DX9	P00742	C26H30N4O3	446.541	446.232	63	66	127.17	6.97	2.62	0	2	6	C/C(=[N+]\1/CC[C@@H](C1)Oc1ccc(cc1)[C@@H](C(=O)O)Cc1ccc2c(c1)cc(cc2)C(=[NH2+])N)/N	0	C202H73N56O67S5+3	train
1fbm	general	Protein-Ligand	2.7	Kd=0.6uM	Kd	6.22	2000	cartilage oligomeric matrix protein	RTL	P35444	C20H36O	292.499	292.277	57	57	20.23	6.91	5.75	1	1	8	OCC[C@H](CC/C=C(/C=C/[C@@H]1[C@@H](C)CCCC1(C)C)\C)C	0	C444H158N130O143+8	valid
1fch	refined	Protein-Ligand	2.2	Kd=70nM	Kd	7.15	2000	peroxisomal targeting signal 1 receptor	5-mer	P50542	C29H49N7O9	639.741	639.359	94	94	292.53	-3.02	-1.45	9	9	26	OC[C@@H](C(=O)N[C@H](C(=O)N[C@H](C(=O)O)CC(C)C)CCCC[NH3+])NC(=O)[C@@H](NC(=O)[C@H](Cc1ccc(cc1)O)[NH3+])CCC(=O)N	0	C384H138N95O115S4+2	test
1fcx	refined	Protein-Ligand	1.47	Kd=64nM	Kd	7.19	2000	retinoic acid receptor gamma-1	184	P13631	C26H28O3	388.499	388.204	57	60	57.53	7.72	5.97	1	3	3	O[C@@H](c1ccc2c(c1)ccc(c2)C(=O)O)c1ccc2c(c1)C(C)(C)CCC2(C)C	0	C362H121N90O88S8+9	valid
1fcy	refined	Protein-Ligand	1.3	Kd=3nM	Kd	8.52	2000	retinoic acid receptor gamma-1	564	P13631	C26H26O3	386.483	386.188	55	58	54.37	8.25	6.12	0	3	2	O=C(c1ccc2c(c1)ccc(c2)C(=O)O)c1ccc2c(c1)C(C)(C)CCC2(C)C	0	C362H121N90O88S8+9	train
1fcz	refined	Protein-Ligand	1.38	Kd=0.6nM	Kd	9.22	2000	retinoic acid receptor gamma-1	156	P13631	C24H26O3	362.461	362.188	53	55	54.37	7.43	5.63	0	3	3	O=C(c1ccc2c(c1)C(C)(C)CCC2(C)C)/C=C/c1ccc(cc1)C(=O)O	0	C362H121N90O88S8+9	train
1fd0	refined	Protein-Ligand	1.38	Kd=4nM	Kd	8.4	2002	retinoic acid receptor gamma-1	254	P13631	C26H27NO3	401.497	401.199	57	60	69.89	8.51	6.11	1	3	3	O/N=C(\c1ccc2c(c1)ccc(c2)C(=O)O)/c1ccc2c(c1)C(C)(C)CCC2(C)C	0	C384H128N94O94S8+9	train
1fd7	general	Protein-Ligand	1.8	IC50=14mM	IC50	1.85	2000	heat-labile enterotoxin b chain	AI1	P32890	C20H23NO7	389.399	389.147	51	53	128.48	0.53	0.19	5	5	11	OC[C@H]1O[C@H](Oc2cccc(c2)C(=O)NCc2ccccc2)[C@@H]([C@H]([C@H]1O)O)O	0	C202H67N61O64S2+6	train
1fe3	general	Protein-Ligand	2.8	Kd=46.7nM	Kd	7.33	2001	fatty acid binding protein, brain	OLA	O15540	C18H36O2	284.477	284.272	56	55	37.3	9.64	6.33	0	2	15	CCCCCCCCCCCCCCCCCC(=O)O	0	C357H120N94O100S3+9	train
1ff1	general	Protein-Ligand	NMR	Kd=12uM	Kd	4.92	2000	epidermal growth factor receptor substrate 15(EH2 of Eps15)	11-mer	P42566	C31H48N7O10	678.754	678.346	96	97	285.2	-3.35	-1.65	8	10	24	OC[C@@H](C(=O)N[C@H](C(=O)N[C@H](C(=O)N1CCC[C@H]1C(=O)N[C@H](C(=O)N[C@H](C(=O)O)CC(C)C)Cc1ccccc1)CC(=O)N)[C@H](O)C)[NH3+]	1	C196H60CaN50O57S2+5	train
1fgi	general	Protein-Ligand	2.5	IC50=10uM	IC50	5	1998	fibroblast growth factor receptor 1	SU1	P11362	C17H16N2O3	296.321	296.116	38	40	82.19	3.29	2.97	2	3	3	OC(=O)CCc1c([nH]cc1C)/C=C/1\C(=O)Nc2c1cccc2	0	C264H85N67O71S2+6	train
1fh7	refined	Protein-Ligand	1.82	Ki=5.8uM	Ki	5.24	2000	xylanase beta-1,4	2-mer	P07986	C10H20NO7	266.268	266.124	38	39	136.22	-3.81	-3.32	6	5	7	O[C@H]1C[NH2+]C[C@H]([C@@H]1O)O[C@@H]1OC[C@H]([C@@H]([C@H]1O)O)O	0	C247H93N67O76+6	train
1fh8	refined	Protein-Ligand	1.95	Ki=0.13uM	Ki	6.89	2000	xylanase beta-1,4	2-mer	P07986	C10H20NO6	250.269	250.129	37	38	115.99	-2.84	-2.29	5	4	6	O[C@@H]1C[NH2+]CC[C@H]1O[C@@H]1OC[C@H]([C@@H]([C@H]1O)O)O	0	C227H87N65O74+5	train
1fh9	refined	Protein-Ligand	1.72	Ki=0.37uM	Ki	6.43	2000	xylanase beta-1,4	2-mer	P07986	C10H18N2O8	294.259	294.106	38	39	164.23	-3.26	-3.75	7	6	8	O/N=C/1\NC[C@H]([C@@H]([C@H]1O)O)O[C@@H]1OC[C@H]([C@@H]([C@H]1O)O)O	0	C207H86N61O65+6	valid
1fhd	refined	Protein-Ligand	1.9	Ki=0.15uM	Ki	6.82	2000	xylanase beta-1,4	2-mer	P07986	C12H18N2O7	302.281	302.111	39	41	137.43	-3.86	-2.88	5	6	7	O[C@@H]1CO[C@H]([C@@H]([C@H]1O)O)O[C@@H]1Cn2ccnc2[C@@H]([C@H]1O)O	0	C239H92N71O76+6	train
1fhr	general	Protein-Ligand	NMR	Kd=100uM	Kd	4	2000	protein kinase spk1	7-mer	P14737 P22216	C43H62N7O19P	1011.96	1011.38	132	133	455.18	2.09	0.07	8	18	32	CC[C@@H]([C@@H](C(=O)N[C@H](C(=O)N[C@H](C(=O)N[C@H](C(=O)N[C@H](C(=O)O)CC(=O)O)CC(C)C)Cc1ccc(cc1)O)Cc1ccc(cc1)OP(O)(O)O)NC(=O)[C@@H](NC(=O)[C@H](CCC(=O)O)[NH3+])CC(=O)O)C	0	C172H48N57O46S+7	train
1fig	general	Protein-Ligand	3	Ki=0.6uM	Ki	6.22	1994	antibody fab fragment	TSA		C10H12O6	228.199	228.063	28	29	104.06	1.63	-0.38	1	5	1	O[C@@H]1C=C[C@@]2(C[C@H]1O[C@@H](C2)C(=O)O)C(=O)O	0	C240H71N64O60+5	train
1fiv	refined	Protein-Ligand	2	Ki=260nM	Ki	6.59	1995	FIV protease	5-mer	P16088	C46H58N6O9	838.988	838.427	119	122	246.12	6.08	5.68	7	9	27	OC(=O)CC[C@@H](C(=O)N[C@H](C(=O)N)Cc1cccc2c1cccc2)NC(=O)C[C@@H]([C@@H](NC(=O)[C@H](C(C)C)NC(=O)[C@H](Cc1cccc2c1cccc2)NC(=O)C)CC(C)C)O	0	C386H121N110O113S5+9	valid
1fj4	general	Protein-Ligand	2.35	Kd=26uM	Kd	4.59	2000	beta-ketoacyl-[acyl carrier protein] synthase i	TLM	P0A953	C11H14O2S	210.293	210.071	28	28	62.6	2.8	2.98	1	2	3	C=C/C(=C/[C@@]1(C)SC(=O)C(=C1O)C)/C	0	C255H98N71O82S4+2	train
1fjs	refined	Protein-Ligand	1.92	Ki=0.11nM	Ki	9.96	2000	coagulation factor xa	Z34	P00742	C25H25F2N6O5	527.5	527.185	63	66	159.33	4.96	1.4	1	4	9	OC(=O)CN(c1c(F)c(Oc2cccc(c2)C2=NCCN2C)nc(c1F)Oc1cc(ccc1O)C(=[NH2+])N)C	0	C303H111N83O93S6+8	train
1fkb	refined	Protein-Ligand	1.7	Kd=0.2nM	Kd	9.7	1993	FK506 binding protein	RAP	P62942	C51H79NO13	914.172	913.555	144	147	195.43	6.02	6.12	3	8	9	CO[C@@H]1C[C@@H](CC[C@H]1O)C[C@H]([C@H]1OC(=O)[C@@H]2CCCCN2C(=O)C(=O)[C@]2(O)O[C@@H](CC[C@H]2C)C[C@H](OC)/C(=C/C=C/C=C/[C@H](C[C@H](C(=O)[C@@H]([C@@H](/C(=C/[C@H](C(=O)C1)C)/C)O)OC)C)C)/C)C	0	C217H72N52O52S2+6	train
1fkg	refined	Protein-Ligand	2	Ki=10nM	Ki	8	1994	FK506 binding protein	SB3	P62942	C28H35NO4	449.582	449.257	68	70	63.68	6.01	5.23	0	3	11	CCC(C(=O)C(=O)N1CCCC[C@H]1C(=O)O[C@@H](c1ccccc1)CCc1ccccc1)(C)C	0	C247H72N59O59S2+6	train
1fkh	refined	Protein-Ligand	1.95	Ki=7nM	Ki	8.15	1994	FK506 binding protein	SBX	P62942	C28H41NO4	455.629	455.304	74	76	63.68	6.91	5.44	0	3	11	CCC(C(=O)C(=O)N1CCCC[C@H]1C(=O)O[C@@H](C1CCCCC1)CCc1ccccc1)(C)C	0	C262H77N63O66S+6	test
1fki	refined	Protein-Ligand	2.2	Ki=100nM	Ki	7	1994	FK506 binding protein	SB1	P62942	C24H39NO6	437.57	437.278	70	71	89.98	5.19	3.9	0	4	0	O=C1CCCCCCCCCCCOC(=O)[C@H]2N(C(=O)C(=O)C(CO1)(C)C)CCCC2	0	C228H71N54O55S+5	train
1fkn	refined	Protein-Ligand	1.9	Ki=1.6nM	Ki	8.8	2000	secretase beta	7-mer	P56817	C41H65N8O14	894	893.462	128	128	377.46	0.83	0.59	9	14	33	CC(C[C@@H]([C@H](C[C@H](C(=O)N[C@H](C(=O)N[C@H](C(=O)N[C@H](C(=O)O)Cc1ccccc1)CCC(=O)O)C)C)O)NC(=O)[C@@H](NC(=O)[C@H](C(C)C)NC(=O)[C@H](CCC(=O)O)[NH3+])CC(=O)N)C	0	C476H133N117O133S+8	train
1fkw	refined	Protein-Ligand	2.4	Ki=9uM	Ki	5.05	1996	adenosine deaminase	PUR	P03958	C10H12N4O4	252.227	252.086	30	32	113.52	-1.56	-1.56	3	6	5	OC[C@H]1O[C@H]([C@@H]([C@@H]1O)O)n1cnc2c1ncnc2	1	C296H106N77O79S5Zn+8	valid
1fl3	refined	Protein-Ligand	2.45	Kd=0.16uM	Kd	6.8	2000	blue fluorescent antibody (19g2)-heavy chain	SPB	P01867 P01837	C19H19NO3	309.359	309.136	42	43	66.4	4.6	4.12	1	3	7	O=C(Nc1ccc(cc1)/C=C/c1ccccc1)CCCC(=O)O	0	C380H102N92O97S3+4	train
1fl6	general	Protein-Ligand	2.8	Kd=37nM	Kd	7.43	2001	antibody germline precursor to 28b4	AAH		C13H21N2O7P	348.289	348.109	44	44	161.84	-0.93	0.45	1	7	7	OC(=O)CCCC[N@@H+](CP(O)(O)O)Cc1ccc(cc1)N(=O)=O	0	C223H76N62O70S+6	test
1flm	general	Protein-Ligand	1.3	Kd=0.43nM	Kd	9.37	2000	fmn-binding protein	FMN	Q46604	C17H22N4O9P	457.352	457.112	53	55	224.84	-2.56	-2	4	8	9	O=c1[nH]c(=O)c2c(n1)n(C[C@@H]([C@@H]([C@@H](COP(O)(O)O)O)O)O)c1c(n2)cc(c(c1)C)C	0	C329H100N91O87S2+7	valid
1flr	refined	Protein-Ligand	1.85	Kd=0.1nM	Kd	10	1995	antibody fab	FLU	P01865	C20H12O5	332.306	332.068	37	40	87.74	3.53	3.97	1	4	2	Oc1ccc2c(c1)oc1c(c2c2ccccc2C(=O)O)ccc(=O)c1	0	C272H82N69O78S2+4	train
1fls	general	Protein-Ligand	NMR	IC50=33nM	IC50	7.48	2001	collagenase 3 (mmp-13)	WAY	P45452	C21H21N3O5S	427.474	427.12	51	53	117.21	2.18	4.38	2	5	9	COc1ccc(cc1)S(=O)(=O)N(c1c(C)cccc1C(=O)NO)Cc1cccnc1	1	C263H75CaN61O68SZn+4	train
1fm9	refined	Protein-Ligand	2.1	Ki=1nM	Ki	9	2001	retinoic acid receptor rxr-alpha	570	P37231 Q15788 P19793	C34H30N2O5	546.612	546.215	71	75	101.66	8.71	6.68	1	4	11	OC(=O)[C@@H](Nc1ccccc1C(=O)c1ccccc1)Cc1ccc(cc1)OCCc1nc(oc1C)c1ccccc1	0	C473H155N114O116S7+9	test
1fmb	general	Protein-Ligand	1.8	Ki=0.1nM	Ki	10	1996	eiav protease	HYB	P32542	C32H42N2O5S	566.751	566.281	82	84	120.95	5.12	5.94	3	5	16	OC[C@@H](NC(=O)[C@H](C(C)C)NC(=O)[C@@H](CS(=O)(=O)C(C)(C)C)Cc1cccc2c1cccc2)Cc1ccccc1	0	C299H104N84O98S+4	train
1fo0	refined	Protein-Ligand	2.5	Kd=2.6uM	Kd	5.59	2000	h-2 class i histocompatibility antigen	8-mer	P04214 Q8CDD8 Q5R1F1 P01901 P01887	C46H67N10O14	984.083	983.484	137	138	412.35	-1.15	0.4	11	14	36	CC[C@@H]([C@@H](C(=O)N[C@H](C(=O)N[C@H](C(=O)N[C@H](C(=O)N[C@H](C(=O)N[C@H](C(=O)N[C@H](C(=O)N[C@@H]([C@H](CC)C)C(=O)O)[C@H](O)C)CC(=O)N)Cc1ccccc1)CC(=O)O)Cc1ccccc1)CC(=O)N)[NH3+])C	0	C607H184N159O173S4+17	train
1fo2	general	Protein-Ligand	2.38	IC50=20uM	IC50	4.7	2001	alpha 1,2-mannosidase	DMJ	Q9UKM7	C6H14NO4	164.18	164.092	25	25	97.53	-2.35	-2.42	5	4	5	OC[C@H]1[NH2+]C[C@H]([C@H]([C@@H]1O)O)O	1	C260H105CaN63O87S+5	train
1fo3	general	Protein-Ligand	1.75	IC50=0.2uM	IC50	6.7	2001	alpha 1,2-mannosidase	KIF	Q9UKM7	C8H12N2O6	232.191	232.07	28	29	130.33	-2.78	-4.01	5	6	5	OC[C@@H]1[C@@H](O)[C@H](O)[C@@H]([C@@H]2N1C(=O)C(=O)N2)O	1	C257H101CaN64O82S+5	valid
1fpc	refined	Protein-Ligand	2.3	Ki=0.1uM	Ki	7	1995	thrombin alpha	0ZI	P28504 P00734	C25H39N6O3S	503.681	503.28	74	76	144.11	4.92	3.15	1	3	11	CC[C@@H]1CCN(CC1)C(=O)[C@@H](NS(=O)(=O)c1cccc2c1cccc2N(C)C)CCC[NH+]=C(N)N	0	C332H103N90O98S5+8	valid
1fpi	general	Protein-Ligand	2.3	IC50=1.3uM	IC50	5.89	1996	Sus scrofa FRUCTOSE-1,6-BISPHOSPHATASE	AMP	P00636	C10H15N5O7P	348.229	348.071	38	40	202.82	-3.71	-1.72	3	8	5	O[C@@H]1[C@H](O)[C@H](O[C@H]1n1cnc2c1ncnc2N)COP(O)(O)O	0	C228H68N67O59S4+8	valid
1fpp	general	Protein-Ligand	2.75	Kd=10nM	Kd	8	1999	farnesyltransferase	FPP	Q02293 Q04631	C15H30O7P2	384.342	384.147	54	53	146.79	2.32	3.76	0	5	10	C/C(=C/COP(OP(O)(O)O)(O)O)/CC/C=C(/CCC=C(C)C)\C	1	C359H114N88O93S6Zn+6	train
1fpy	general	Protein-Ligand	2.89	Ki=1uM	Ki	6	2001	glutamine synthetase	PPQ	P0A1P6	C5H14NO4P	183.143	183.066	25	24	118.99	-3.54	-1.47	1	4	3	OC(=O)[C@H](CCP(O)(O)C)[NH3+]	1	C277H97Mn2N77O81S+7	train
1fq4	general	Protein-Ligand	2.7	Ki=398.0nM	Ki	6.4	2000	saccharopepsin	2Y2	P07267	C33H52N6O5S	644.868	644.372	97	100	182.92	3.58	2.02	7	5	22	C#CC[C@@H]([C@H]([NH2+]CC[NH+]1CCOCC1)O)C[C@H]([C@@H](NC(=O)[C@@H](NC(=O)c1nc2c([nH]1)cccc2)CSC)CC1CCCCC1)O	0	C356H110N78O105S+	train
1fq5	refined	Protein-Ligand	2.4	Ki=4.0nM	Ki	8.4	2000	saccharopepsin	0GM	P07267	C51H61N5O6	840.06	839.462	123	128	165.73	7.43	8.12	6	6	12	CC(C[C@@H]1NC(=O)[C@H](CCC(=O)NCc2cccc(CNC(=O)[C@@H](NC(=O)C[C@@H]1O)CC(C)C)c2)NC(=O)C(Cc1cccc2c1cccc2)Cc1cccc2c1cccc2)C	0	C366H119N84O109S+3	valid
1fq6	general	Protein-Ligand	2.7	Ki=13.7nM	Ki	7.86	2000	saccharopepsin	0QF	P07267	C31H52N4O7S2	656.897	656.328	96	98	190.98	4.31	4.37	5	6	21	CCS[C@@H](C(=O)N[C@H]([C@H]([C@H](CC(C)C)O)O)CC1CCCCC1)NC(=O)[C@@H](NS(=O)(=O)N1CCOCC1)Cc1ccccc1	0	C381H122N89O107S+3	train
1fq7	general	Protein-Ligand	2.8	Ki=3.74uM	Ki	5.43	2000	saccharopepsin	2Y3	P07267	C37H58N6O6	682.893	682.442	107	109	174.54	5.65	5.75	6	6	24	CNC(=O)[C@@H](C[C@@H]([C@@H](NC(=O)[C@H](Cc1cnc[nH]1)NC(=O)[C@H](Cc1ccccc1)NC(=O)OC(C)(C)C)CC1CCCCC1)O)CC(C)C	0	C438H137N103O121S+3	train
1fq8	general	Protein-Ligand	2.8	Ki=0.94uM	Ki	6.03	2000	saccharopepsin	2Y4	P07267	C32H49F2N5O6	637.758	637.365	94	96	149.1	4.22	4.01	5	5	21	CCCC[C@@H](C(=O)N[C@H]([C@H](C(C(=O)NC)(F)F)O)CC1CCCCC1)NC(=O)[C@@H](NC(=O)N1CCOCC1)Cc1ccccc1	0	C375H124N85O107S+3	train
1fsg	general	Protein-Ligand	1.05	IC50=9.5uM	IC50	5.02	2000	hypoxanthine-guanine phosphoribosyltransferase	9DG	Q26997	C6H6N4O	150.138	150.054	17	18	87.56	-0.76	0.41	3	1	0	Nc1nc2cc[nH]c2c(=O)[nH]1	1	C245H85Mg2N64O72S+6	train
1fsw	general	Protein-Ligand	1.9	Ki=0.32uM	Ki	6.49	2001	cephalosporinase	CTB	P00811	C7H10BNO3S	199.035	199.047	23	23	97.8	-0.21	0.23	3	3	7	OB(CNC(=O)Cc1cccs1)O	0	C232H80N66O74+6	train
1fsy	general	Protein-Ligand	1.75	Ki=0.15uM	Ki	6.82	2001	cephalosporinase	105	P00811	C12H12BClN2O4	294.499	294.058	32	33	95.59	1.28	1.85	3	4	7	OB(CNC(=O)c1c(C)onc1c1ccccc1Cl)O	0	C215H72N59O71+4	train
1ft4	general	Protein-Ligand	2.9	IC50=0.27uM	IC50	6.57	2001	soluble tumor necrosis factor receptor 1	703	P19438	C21H21N4O4S2	457.546	457.1	52	56	146.23	3.62	4.46	1	3	5	O=N(=O)c1cccc(c1)c1sc2c(c1)n1c(c2)c(=O)n(c1=S)CCC[NH+]1CCOCC1	0	C137H50N39O41S2+5	train
1ft7	refined	Protein-Ligand	2.2	Ki=6.6uM	Ki	5.18	2000	BACTERIAL LEUCYL AMINOPEPTIDASE	PLU	Q01693	C5H16NO3P	169.159	169.087	26	25	101.92	-3.13	-0.66	1	3	2	[NH3+][C@H](P(O)(O)O)CC(C)C	1	C218H85N57O83S4Zn2+3	test
1fta	general	Protein-Ligand	2.3	IC50=0.44uM	IC50	6.36	1995	human liver fructose-1,6-bisphosphatase (FBPase)	AMP	P09467	C10H15N5O7P	348.229	348.071	38	40	202.82	-3.71	-1.72	3	8	5	O[C@@H]1[C@H](O)[C@H](O[C@H]1n1cnc2c1ncnc2N)COP(O)(O)O	0	C196H67N58O55S4+7	valid
1ftj	general	Protein-Ligand	1.9	IC50=821nM	IC50	6.09	2000	glutamate receptor subunit 2	GLU	P19491	C5H10NO4	148.137	148.061	20	19	102.24	-1.18	-1.45	1	4	2	OC(=O)CC[C@@H](C(=O)O)[NH3+]	0	C268H94N64O79S3+5	train
1ftk	general	Protein-Ligand	1.6	IC50=14.5uM	IC50	4.84	2000	glutamate receptor subunit 2	KAI	P19491	C10H18NO4	216.254	216.124	33	33	91.21	0.59	0.95	1	4	2	OC(=O)C[C@H]1[C@H](C[NH2+][C@@H]1C(=O)O)C(C)C	0	C273H89N65O80S2+5	test
1ftm	refined	Protein-Ligand	1.7	Kd=24.8nM	Kd	7.61	2000	glutamate receptor 2	AMQ	P19491	C7H11N2O4	187.173	187.072	24	24	110.94	-2.34	-1.49	2	3	2	OC(=O)[C@H](Cc1c(C)o[nH]c1=O)[NH3+]	0	C313H100N72O87S3+5	valid
1fv0	refined	Protein-Ligand	1.7	Ki=1.18uM	Ki	5.93	2002	phospholipase a2	9AR	P59071	C17H11NO8	357.271	357.048	37	40	131.04	4.29	3.57	1	5	2	COc1c(O)ccc2c1cc(N(=O)=O)c1c2c2OCOc2cc1C(=O)O	0	C217H75N48O61S8+3	valid
1fv9	general	Protein-Ligand	3	IC50=10uM	IC50	5	2000	urokinase-type plasminogen activator	172	P00749	C7H7N3O	149.15	149.059	18	19	74.93	0.78	1.43	3	2	1	Oc1ccc2c(c1)[nH]c(n2)N	0	C211H89N59O66S5+5	train
1fvt	general	Protein-Ligand	2.2	IC50=60nM	IC50	7.22	2001	cell division protein kinase 2	106	P24941	C14H11BrN4O3S	395.231	393.974	34	36	122.03	2.13	3.86	3	3	3	Brc1ccc2c(c1)/C(=N/Nc1ccc(cc1)S(=O)(=O)N)/C(=O)N2	0	C299H80N69O71S+8	valid
1fvv	general	Protein-Ligand	2.8	IC50=10nM	IC50	8	2001	cell division protein kinase 2	107	P20248 P24941	C21H15N5O3S2	449.506	449.062	46	50	150.03	2.12	2.58	2	5	6	O=C1N=c2c(=C1CNc1ccc(cc1)S(=O)(=O)Nc1ccccn1)c1scnc1cc2	0	C310H86N76O79+9	train
1fw0	general	Protein-Ligand	1.9	Ki=3690nM	Ki	5.43	2000	Rat GluR2 Ligand Binding Core (S1S2J)	KAI	P19491	C10H16NO4	214.238	214.108	31	31	91.21	0.52	0.87	1	4	2	OC(=O)C[C@H]1[C@H](C[NH2+][C@@H]1C(=O)O)C(=C)C	0	C269H88N62O79S2+5	train
1fwe	general	Protein-Ligand	2	Ki=2.5uM	Ki	5.6	1997	Klebsiella aerogenes urease, C319A variant	HAE	P18314 P18315 P18316	C2H5NO2	75.067	75.032	10	9	49.33	-0.95	-0.1	2	2	2	CC(=O)NO	1	C170H70N56Ni2O55S3+5	valid
1fwu	general	Protein-Ligand	1.9	Kd=0.20mM	Kd	3.7	2001	cysteine-rich domain of mannose receptor	3-mer	Q61830	C20H37NO18S	611.569	611.173	77	79	332.31	-6.13	-4.85	9	12	17	OC[C@H]1O[C@@H](O)[C@@H]([C@H]([C@@H]1O[C@@H]1O[C@H](CO)[C@@H]([C@@H]([C@H]1O)OS(O)(O)O)O)O[C@@H]1O[C@@H](C)[C@H]([C@H]([C@@H]1O)O)O)NC(=O)C	0	C117H31N35O35+3	test
1fwv	general	Protein-Ligand	2.2	Kd=0.19mM	Kd	3.72	2001	cysteine-rich domain of mannose receptor	3-mer	Q61830	C20H37NO18S	611.569	611.173	77	79	332.31	-6.13	-4.85	9	12	17	OC[C@H]1O[C@@H](O)[C@@H]([C@H]([C@@H]1O[C@@H]1O[C@@H](C)[C@H]([C@H]([C@@H]1O)O)O)O[C@@H]1O[C@H](CO)[C@@H]([C@@H]([C@H]1O)OS(O)(O)O)O)NC(=O)C	0	C163H38N44O40+4	test
1fyr	general	Protein-Ligand	2.4	IC50=2.4uM	IC50	5.62	2000	growth factor receptor bound protein 2	5-mer	P62993 P08581	C25H39N5O11P	616.578	616.238	81	81	280.3	-0.16	0.76	5	10	18	CC(=O)N[C@H](C(=O)N[C@H](C(=O)N[C@H](C(=O)N[C@H](C(=O)O)C(C)C)CC(=O)N)C(C)C)Cc1ccc(cc1)OP(O)(O)O	0	C229H73N64O62+6	valid
1fzj	refined	Protein-Ligand	1.9	Kd=8nM	Kd	8.1	2001	h-2 class i histocompatibility antigen	8-mer	P03521 P01901 P01887	C44H68N12O12	957.084	956.508	136	137	418.2	-0.19	-0.83	11	12	37	NC(=O)CC[C@@H](C(=O)NCC(=O)N[C@H](C(=O)O)CC(C)C)NC(=O)[C@@H](NC(=O)[C@H](C(C)C)NC(=O)[C@H](Cc1ccc(cc1)O)NC(=O)CNC(=O)[C@H](CCC[NH+]=C(N)N)[NH3+])Cc1ccc(cc1)O	0	C460H133N105O122S3+8	train
1fzk	refined	Protein-Ligand	1.7	Kd=4nM	Kd	8.4	2001	h-2 class i histocompatibility antigen	9-mer	P04857 P01901 P01887	C46H65N10O12	950.068	949.478	133	136	343.48	-1.31	0.28	9	12	31	CC(C[C@@H](C(=O)O)NC(=O)[C@@H](NC(=O)[C@@H]1CCCN1C(=O)[C@H](Cc1ccc(cc1)O)NC(=O)[C@H](CC(=O)N)NC(=O)CNC(=O)[C@@H]1CCCN1C(=O)[C@@H](NC(=O)[C@H](Cc1ccccc1)[NH3+])C)C)C	0	C425H126N95O108S3+7	test
1fzm	refined	Protein-Ligand	1.8	Kd=20nM	Kd	7.7	2001	h-2 class i histocompatibility antigen	8-mer	P03521 P01901 P01887	C44H68N12O12	957.084	956.508	136	137	418.2	-0.19	-0.83	11	12	37	NC(=O)CC[C@@H](C(=O)NCC(=O)N[C@H](C(=O)O)CC(C)C)NC(=O)[C@@H](NC(=O)[C@H](C(C)C)NC(=O)[C@H](Cc1ccc(cc1)O)NC(=O)CNC(=O)[C@H](CCC[NH+]=C(N)N)[NH3+])Cc1ccc(cc1)O	0	C380H112N102O100S+10	test
1fzo	refined	Protein-Ligand	1.8	Kd=13nM	Kd	7.89	2001	h-2 class i histocompatibility antigen	9-mer	P04857 P01901 P01887	C46H65N10O12	950.068	949.478	133	136	343.48	-1.31	0.28	9	12	31	CC(C[C@@H](C(=O)O)NC(=O)[C@@H](NC(=O)[C@@H]1CCCN1C(=O)[C@H](Cc1ccc(cc1)O)NC(=O)[C@H](CC(=O)N)NC(=O)CNC(=O)[C@@H]1CCCN1C(=O)[C@@H](NC(=O)[C@H](Cc1ccccc1)[NH3+])C)C)C	0	C429H124N106O108S+10	train
1fzq	refined	Protein-Ligand	1.7	Kd=24nM	Kd	7.62	2000	adp-ribosylation factor-like protein 3	GDP	Q9WUL7	C10H17N5O11P2	445.216	445.04	45	47	286.07	-5.72	-2.75	4	9	7	O[C@@H]1[C@@H](COP(OP(O)(O)O)(O)O)O[C@H]([C@@H]1O)n1cnc2c1nc(N)[nH]c2=O	0	C205H70N57O65S+5	train
1g05	general	Protein-Ligand	2.45	IC50=3.1nM	IC50	8.51	2001	stromelysin-1 precursor	BBH	P08254	C19H21N3O6S	419.452	419.115	50	52	124.63	0.73	2.3	2	5	8	ONC(=O)[C@H]1CC(=O)N(CN1S(=O)(=O)c1ccc(cc1)OC)Cc1ccccc1	1	C304H94CaN74O79SZn+6	train
1g1d	refined	Protein-Ligand	2.04	Kd=0.36nM	Kd	9.44	2000	carbonic anhydrase ii	FSB	P00918	C14H13FN2O3S	308.328	308.063	34	35	97.64	1.36	3.58	2	3	5	O=C(c1ccc(cc1)S(=O)(=O)N)NCc1ccccc1F	1	C325H99N84O73SZn+6	train
1g27	general	Protein-Ligand	2.1	IC50=7nM	IC50	8.15	2001	peptide deformylase	BB1	P0A6K3	C16H31N3O4	329.435	329.231	54	53	89.95	1.8	2.29	2	4	13	CCCC[C@@H](C(=O)N[C@@H](C(C)(C)C)C(=O)N(C)C)CN(C=O)O	1	C270H93N72NiO79S5+5	train
1g2a	general	Protein-Ligand	1.75	IC50=10nM	IC50	8	2001	peptide deformylase	BB2	P0A6K3	C19H35N3O5	385.498	385.258	62	62	118.97	1.55	1.92	4	5	16	CCCCC[C@@H](C(=O)N[C@H](C(=O)N1CCC[C@H]1CO)C(C)C)CC(=O)NO	1	C292H104N79NiO82S5+7	train
1g2k	refined	Protein-Ligand	1.95	Ki=11nM	Ki	7.96	2001	HIV-1 protease	NM1	P04587	C34H37N3O7S	631.738	631.235	82	86	137.02	3.69	4.57	3	5	14	CNC(=O)c1cccc(c1)CN1[C@H](COc2ccccc2)[C@H](O)[C@H]([C@H](N(S1(=O)=O)Cc1ccccc1)COc1ccccc1)O	0	C333H107N89O93S2+6	train
1g2l	refined	Protein-Ligand	1.9	Ki=57nM	Ki	7.24	2001	coagulation factor xa	T87	P00742	C29H32N7O3	526.609	526.257	71	75	142.24	5.5	2.83	1	3	12	CCOC(=O)CO/N=C(\C1(CC1)c1ccc2c(c1)nc(n2C)CNc1ccc(cc1)C(=[NH2+])N)/c1ccccn1	0	C309H109N79O94S6+6	train
1g2o	refined	Protein-Ligand	1.75	Ki=28pM	Ki	10.55	2001	purine nucleoside phosphorylase	IMH	P9WP01	C11H15N4O4	267.261	267.109	34	36	138.84	-2.3	-1.48	6	4	5	OC[C@H]1[NH2+][C@H]([C@@H]([C@@H]1O)O)c1c[nH]c2c1nc[nH]c2=O	0	C308H97N82O93S+3	train
1g30	refined	Protein-Ligand	2	Ki=140nM	Ki	6.85	2001	thrombin pro	T87	P28506 P00734	C29H32N7O3	526.609	526.257	71	75	142.24	5.5	2.83	1	3	12	CCOC(=O)CO/N=C(\C1(CC1)c1ccc2c(c1)nc(n2C)CNc1ccc(cc1)C(=[NH2+])N)/c1ccccn1	0	C322H106N87O96S6+7	train
1g32	refined	Protein-Ligand	1.9	Ki=780nM	Ki	6.11	2001	thrombin pro	R11	P28506 P00734	C25H26N7	424.521	424.225	58	62	99.28	5.25	3.13	1	2	6	Cn1c(CNc2ccc(cc2)C(=[NH2+])N)nc2c1ccc(c2)Cn1c(C)nc2c1cccc2	0	C319H108N87O95S6+7	valid
1g35	refined	Protein-Ligand	1.8	Ki=7.3nM	Ki	8.14	2001	HIV-1 protease	AHF	P03366	C35H38N2O9S	662.749	662.23	85	89	154.45	3.38	4.1	3	6	16	COC(=O)c1ccc(cc1)CN1[C@H](COc2ccccc2)[C@H](O)[C@H]([C@H](N(S1(=O)=O)Cc1ccc(cc1)CO)COc1ccccc1)O	0	C343H110N91O96S2+6	test
1g36	refined	Protein-Ligand	1.9	Ki=67nM	Ki	7.17	2001	trypsinogen	R11	P00760	C25H26N7	424.521	424.225	58	62	99.28	5.25	3.13	1	2	6	Cn1c(CNc2ccc(cc2)C(=[NH2+])N)nc2c1ccc(c2)Cn1c(C)nc2c1cccc2	0	C289H106N73O88S6+4	train
1g37	general	Protein-Ligand	2	IC50=0.1nM	IC50	10	2001	thrombin alpha	110	P00734	C28H43N4O7S	579.729	579.285	83	86	169.34	1.42	1.53	3	6	14	CCCCOC(=O)[C@H]([C@H]([C@@H]1CC[C@H](CC1)[NH3+])NC(=O)[C@@H]1CC[C@@H]2N1C(=O)CN(C2)S(=O)(=O)Cc1ccccc1)O	0	C351H114N88O103S6+6	train
1g3b	general	Protein-Ligand	1.8	Ki=1.8uM	Ki	5.74	2001	trypsin beta	108	P00760	C11H14N3O3	236.247	236.104	31	31	121.5	2.98	-0.55	1	3	4	OC(=O)[C@@H](/N=C/c1cc(ccc1O)C(=[NH2+])N)C	1	C214H83MgN56O66S5+4	test
1g3f	general	Protein-Ligand	NMR	Kd=0.43uM	Kd	6.37	2001	inhibitor of apoptosis protein 3	9-mer	Q9NR28 P98170	C41H73N11O14	944.084	943.534	139	139	417.21	-5.35	-2.28	11	14	37	CC[C@@H]([C@@H](C(=O)N[C@H](C(=O)N[C@H](C(=O)N[C@H](C(=O)N[C@H](C(=O)N[C@H](C(=O)O)CCC(=O)O)CO)CCCC[NH3+])CCC(=O)N)C)NC(=O)[C@@H]1CCCN1C(=O)[C@H](C(C)C)NC(=O)[C@@H]([NH3+])C)C	0	C163H47N37O41+3	test
1g3m	general	Protein-Ligand	1.7	IC50=0.10nM	IC50	10	2003	estrogen sulfotransferase	PCQ	P49888	C12H6Cl4O2	323.987	321.912	24	25	40.46	5.35	5.38	2	2	3	Clc1cc(cc(c1O)Cl)c1cc(Cl)c(c(c1)Cl)O	0	C259H81N56O62S4+6	train
1g45	refined	Protein-Ligand	1.83	Kd=2.3nM	Kd	8.64	2000	carbonic anhydrase ii	FSB	P00918	C14H13FN2O3S	308.328	308.063	34	35	97.64	1.36	3.58	2	3	5	O=C(c1ccc(cc1)S(=O)(=O)N)NCc1ccccc1F	1	C298H96N78O70SZn+5	train
1g46	refined	Protein-Ligand	1.84	Kd=1.6nM	Kd	8.8	2000	carbonic anhydrase ii	F2B	P00918	C14H12F2N2O3S	326.318	326.054	34	35	97.64	1.46	3.71	2	3	5	O=C(c1ccc(cc1)S(=O)(=O)N)NCc1cccc(c1F)F	1	C344H107N88O78S2Zn+6	train
1g48	refined	Protein-Ligand	1.86	Kd=3.9nM	Kd	8.41	2000	carbonic anhydrase ii	F6B	P00918	C14H12F2N2O3S	326.318	326.054	34	35	97.64	1.46	3.71	2	3	5	O=C(c1ccc(cc1)S(=O)(=O)N)NCc1c(F)cccc1F	1	C338H101N88O80SZn+5	valid
1g49	general	Protein-Ligand	1.9	IC50=16nM	IC50	7.8	2001	stromelysin-1	111	P08254	C16H25N3O7S2	435.516	435.113	53	54	158.87	0.48	2.93	3	6	11	CCCCOc1ccc(cc1)S(=O)(=O)N1C[C@H](C[C@@H]1C(=O)NO)NS(=O)(=O)C	1	C302H96CaN69O76SZn+5	valid
1g4j	general	Protein-Ligand	1.84	Kd=2.0nM	Kd	8.7	2000	carbonic anhydrase ii	FFB	P00918	C14H9F5N2O3S	380.29	380.025	34	35	97.64	1.76	4.13	2	3	5	O=C(c1ccc(cc1)S(=O)(=O)N)NCc1c(F)c(F)c(c(c1F)F)F	1	C311H96N81O67S2Zn+6	test
1g4k	general	Protein-Ligand	2	IC50=2.0uM	IC50	5.7	2001	stromelysin-1	HQQ	P08254	C17H14N2O4	310.304	310.095	37	39	84.5	2.42	2.76	2	3	3	O=C1NC(=O)C(C(=O)N1)(C)c1ccc(cc1)Oc1ccccc1	1	C288H95CaN71O74SZn+6	train
1g4o	refined	Protein-Ligand	1.96	Kd=5.6nM	Kd	8.25	2000	carbonic anhydrase ii	BSB	P00918	C14H14N2O3S	290.338	290.073	34	35	97.64	1.26	3.44	2	3	5	O=C(c1ccc(cc1)S(=O)(=O)N)NCc1ccccc1	1	C297H101N78O72SZn+5	test
1g50	general	Protein-Ligand	2.9	Kd=0.53uM	Kd	6.28	2002	wildtype human estrogen receptor alpha ligand-binding domain (hERalpha LBD)	EST	P03372	C18H24O2	272.382	272.178	44	47	40.46	3.9	3.61	2	2	2	Oc1ccc2c(c1)CC[C@@H]1[C@@H]2CC[C@]2([C@H]1CC[C@@H]2O)C	0	C344H103N79O85S9+4	train
1g52	refined	Protein-Ligand	1.8	Kd=0.29nM	Kd	9.54	2000	carbonic anhydrase ii	F2B	P00918	C14H12F2N2O3S	326.318	326.054	34	35	97.64	1.46	3.71	2	3	5	O=C(c1ccc(cc1)S(=O)(=O)N)NCc1cccc(c1F)F	1	C322H99N81O73SZn+5	train
1g53	refined	Protein-Ligand	1.94	Kd=0.91nM	Kd	9.04	2000	carbonic anhydrase ii	F6B	P00918	C14H12F2N2O3S	326.318	326.054	34	35	97.64	1.46	3.71	2	3	5	O=C(c1ccc(cc1)S(=O)(=O)N)NCc1c(F)cccc1F	1	C347H105N86O78SZn+6	train
1g54	refined	Protein-Ligand	1.86	Kd=1.5nM	Kd	8.82	2000	carbonic anhydrase ii	FFB	P00918	C14H9F5N2O3S	380.29	380.025	34	35	97.64	1.76	4.13	2	3	5	O=C(c1ccc(cc1)S(=O)(=O)N)NCc1c(F)c(F)c(c(c1F)F)F	1	C315H99N80O72SZn+5	valid
1g5f	general	Protein-Ligand	1.8	Ki=2.31mM	Ki	2.64	2001	1,3,4,6-tetrachloro-1,4-cyclohexadiene hydrolas	DCE	D4Z2G1	C2H4Cl2	98.959	97.969	8	7	0	1.41	1.46	0	0	1	ClCCCl	0	C228H80N55O53S2+2	test
1g5s	general	Protein-Ligand	2.61	IC50=48nM	IC50	7.32	2001	cell division protein kinase 2	I17	P24941	C23H32N7	406.547	406.272	62	66	95.3	3.75	3.66	3	3	6	[NH3+][C@@H]1CC[C@H](CC1)Nc1nc(NCc2ccccc2)c2c(n1)n(cn2)C1CCCC1	0	C326H88N76O78+9	train
1g6g	general	Protein-Ligand	1.6	Kd=530nM	Kd	6.28	2000	Rad53p-FHA1 from Saccharomyces cerevisiae	13-mer	P22216	C35H61N8O20P	944.874	944.374	125	124	484.28	-2.09	-3.21	9	19	33	OC[C@@H](C(=O)N[C@H](C(=O)N[C@H](C(=O)N[C@H](C(=O)N[C@@H]([C@H](OP(O)(O)O)C)C(=O)N[C@H](C(=O)N[C@H](C(=O)N[C@H](C(=O)O)CC(=O)O)C)CCC(=O)O)C(C)C)CCC(=O)O)CC(C)C)[NH3+]	0	C130H46N45O44S+4	train
1g6s	general	Protein-Ligand	1.5	Kd=7uM	Kd	5.15	2001	enzyme 5-enolpyruvylshikimate 3-phosphate (EPSP) synthase	S3P	P0A6D3	C7H12O8P	255.139	255.027	28	28	161.27	-2.06	-1.84	2	7	3	O[C@H]1[C@H](O)CC(=C[C@H]1OP(O)(O)O)C(=O)O	0	C285H108N89O88S2+9	test
1g74	refined	Protein-Ligand	1.7	Kd=0.30uM	Kd	6.52	2003	adipocyte lipid-binding protein	OLA	P04117	C18H34O2	282.461	282.256	54	53	37.3	8.71	6.11	0	2	14	CCCCCCCC/C=C\CCCCCCCC(=O)O	0	C362H125N97O109S5+11	train
1g7f	refined	Protein-Ligand	1.8	Ki=3.4uM	Ki	5.47	2001	tyrosine phosphatase 1b	INZ	P18031	C27H33N3O9	543.566	543.222	72	73	191.36	6.1	2.99	3	8	16	CCCCCNC(=O)[C@H](Cc1ccc(cc1)OC(C(=O)O)C(=O)O)NC(=O)N[C@H](C(=O)O)Cc1ccccc1	0	C226H75N77O68S3+10	train
1g7g	refined	Protein-Ligand	2.2	Ki=0.25uM	Ki	6.6	2001	tyrosine phosphatase 1b	INX	P18031	C30H37N3O10	599.629	599.248	80	81	208.43	5.94	2.95	3	9	19	CCCCCNC(=O)[C@@H](NC(=O)[C@H](Cc1ccccc1)NC(=O)CCC(=O)O)Cc1ccc(c(c1)C(=O)O)OCC(=O)O	0	C250H88N83O70S3+11	train
1g7p	general	Protein-Ligand	1.5	Kd=90nM	Kd	7.05	2002	h-2 class i histocompatibility antigen, k-b	9-mer	P07265 P01901 P01887	C42H74N17O15S	1089.21	1088.53	149	150	572.94	-3.76	-7.63	12	16	43	CSCC[C@@H](C(=O)O)NC(=O)[C@@H]1CCCN1C(=O)[C@H]([C@H](O)C)NC(=O)[C@@H](NC(=O)[C@@H](NC(=O)[C@@H](NC(=O)[C@@H](NC(=O)[C@@H](NC(=O)[C@H](CO)[NH3+])CCC[NH+]=C(N)N)CC(=O)O)Cc1[nH]cnc1)CO)CCC[NH+]=C(N)N	0	C357H121N88O103S+7	valid
1g7q	refined	Protein-Ligand	1.6	Kd=877nM	Kd	6.06	2002	h-2 class i histocompatibility antigen	8-mer	P01901 P01887	C33H57N11O13	815.872	815.414	114	115	394.83	-3.47	-5.66	8	13	28	OC[C@@H](C(=O)N[C@H](C(=O)N1CCC[C@H]1C(=O)N[C@H](C(=O)N[C@H](C(=O)N[C@H](C(=O)N1CCC[C@H]1C(=O)N[C@H](C(=O)O)C)CCC[NH+]=C(N)N)[C@H](O)C)CC(=O)O)C)[NH3+]	0	C392H120N99O107S+9	valid
1g7v	refined	Protein-Ligand	2.4	Kd=0.4uM	Kd	6.4	2001	2-dehydro-3-deoxyphosphooctonate aldolase	PAI	P0A715	C9H24NO13P2	416.233	416.072	49	48	280.45	-7.84	-6.23	5	12	13	OC(=O)C[N@H+](CP(O)(O)O)C[C@H]([C@H]([C@@H]([C@@H](COP(O)(O)O)O)O)O)O	0	C259H92N80O81S2+9	test
1g85	refined	Protein-Ligand	1.8	Kd=3.3uM	Kd	5.48	2002	odorant-binding protein	3OL	P07435	C8H18O	130.228	130.136	27	26	20.23	2.84	2.34	1	1	6	CCCCC[C@@H](CC)O	0	C324H93N77O80+8	train
1g98	refined	Protein-Ligand	1.9	Ki=2uM	Ki	5.7	2001	glucose-6-phosphate isomerase	PA5	Q9N1E2	C5H12O9P	247.117	247.022	27	26	181.5	-3.12	-3.18	3	8	7	O[C@@H]([C@H]([C@@H](C(=O)O)O)O)COP(O)(O)O	0	C278H104N79O94+6	train
1g9a	general	Protein-Ligand	2.1	IC50=5uM	IC50	5.3	2002	botulinum neurotoxin type b	BAB	P10844	C17H18N8	334.378	334.165	43	46	160.58	4.62	-0.64	2	2	4	NC(=[NH2+])c1ccc2c(c1)[nH]c(n2)Cc1nc2c([nH]1)ccc(c2)C(=[NH2+])N	1	C345H133N83O115S2Zn2+5	train
1g9b	general	Protein-Ligand	2	IC50=5uM	IC50	5.3	2002	botulinum neurotoxin type b	BAB	P10844	C17H18N8	334.378	334.165	43	46	160.58	4.62	-0.64	2	2	4	NC(=[NH2+])c1ccc2c(c1)[nH]c(n2)Cc1nc2c([nH]1)ccc(c2)C(=[NH2+])N	1	C353H136N86O118S2Zn2+5	train
1g9c	general	Protein-Ligand	2.35	IC50=5uM	IC50	5.3	2002	botulinum neurotoxin type b	BAB	P10844	C17H18N8	334.378	334.165	43	46	160.58	4.62	-0.64	2	2	4	NC(=[NH2+])c1ccc2c(c1)[nH]c(n2)Cc1nc2c([nH]1)ccc(c2)C(=[NH2+])N	1	C343H127N84O110S3Zn2+6	test
1g9d	general	Protein-Ligand	2.2	IC50=5uM	IC50	5.3	2002	botulinum neurotoxin type b	BAB	P10844	C17H18N8	334.378	334.165	43	46	160.58	4.62	-0.64	2	2	4	NC(=[NH2+])c1ccc2c(c1)[nH]c(n2)Cc1nc2c([nH]1)ccc(c2)C(=[NH2+])N	0	C286H96N66O83S3+5	train
1g9r	general	Protein-Ligand	2	Ki=2uM	Ki	5.7	2001	glycosyl transferase	UPF	Q93EK7	C15H25FN2O16P2	570.309	570.066	61	63	310.26	-5.77	-4.69	6	11	14	OC[C@H]1O[C@H](OP(OP(OC[C@H]2O[C@H]([C@@H]([C@@H]2O)O)n2ccc(=O)[nH]c2=O)(O)O)(O)O)[C@@H]([C@H]([C@H]1O)O)F	1	C401H116MnN100O112SSe+5	valid
1g9s	general	Protein-Ligand	2.8	Ki=247uM	Ki	3.61	2002	hypoxanthine phosphoribosyltransferase	IMP	P0A9M2	C10H14N4O8P	349.214	349.055	37	39	196.77	-3.96	-2.59	3	7	5	O[C@@H]1[C@H](O)[C@H](O[C@H]1n1cnc2c1nc[nH]c2=O)COP(O)(O)O	0	C290H90N75O83S+7	valid
1g9t	general	Protein-Ligand	2.8	Ki=526uM	Ki	3.28	2002	hypoxanthine phosphoribosyltransferase	5GP	P0A9M2	C10H15N5O8P	364.229	364.066	39	41	222.79	-4.54	-2.43	4	7	5	O[C@@H]1[C@H](O)[C@H](O[C@H]1n1cnc2c1nc(N)[nH]c2=O)COP(O)(O)O	0	C288H89N73O80S2+6	train
1ga8	general	Protein-Ligand	2	Ki=16mM	Ki	1.8	2001	galactosyl transferase lgtc	DEL	Q93EK7	C12H22O10	326.297	326.121	44	45	169.3	-4.31	-4.37	7	7	11	OC[C@@H]1C[C@H](O)[C@H]([C@@H](O1)O[C@@H]1[C@@H](CO)O[C@H]([C@@H]([C@H]1O)O)O)O	1	C323H103MnN82O91SSe2+6	valid
1ga9	general	Protein-Ligand	2.1	Ki=83nM	Ki	7.08	2001	beta-lactamase	ETP	P00811	C16H14BNO6S3	423.291	423.008	41	43	165.77	2.16	3.3	3	6	8	OB(c1cccc(c1)NS(=O)(=O)c1scc(c1)S(=O)(=O)c1ccccc1)O	0	C258H83N73O83+6	train
1gaf	refined	Protein-Ligand	1.95	Kd=10nM	Kd	8	1996	chimeric 48g7 fab	NPE	P01834 P01857	C11H15NO7P	304.213	304.059	35	35	146.4	2.15	2.5	0	6	6	OC(=O)CCCCP(Oc1ccc(cc1)N(=O)=O)(O)O	0	C287H78N68O63S2+5	valid
1gag	general	Protein-Ligand	2.7	Ki=750nM	Ki	6.12	2001	insulin receptor, tyrosine kinase domain	13-mer	P06213	C56H87N14O18S2	1308.5	1307.58	177	179	545.54	-4.75	-0.85	15	18	52	CSCC[C@@H](C(=O)N[C@H](C(=O)N[C@H](C(=O)N[C@H](C(=O)N1CCC[C@H]1C(=O)N[C@H](C(=O)NCC=O)C(C)C)CO)CCSC)CC(=O)N)NC(=O)[C@@H](NC(=O)[C@@H](NC(=O)CNC(=O)[C@H]([C@H](O)C)NC(=O)[C@@H](NC(=O)[C@H]1[NH2+]CCC1)C)CC(=O)O)Cc1ccccc1	1	C255H81Mg2N81O73S2+9	train
1gah	general	Protein-Ligand	2	Ki=1pM	Ki	12	1996	glucoamylase-471	ACR	P69327	C25H44NO18	646.613	646.256	88	91	325.75	-8.53	-9.59	14	13	22	OC[C@H]1O[C@H](O[C@@H]2[C@@H](CO)O[C@@H]([C@@H]([C@H]2O)O)O)[C@@H]([C@H]([C@@H]1O[C@H]1O[C@H](C)[C@H]([C@@H]([C@H]1O)O)[NH2+][C@H]1C=C(CO)[C@H]([C@@H]([C@H]1O)O)O)O)O	0	C326H103N77O91+5	train
1gai	refined	Protein-Ligand	1.7	Ki=10nM	Ki	8	1996	glucoamylase-471	GAC	P69327	C25H46NO18	648.629	648.271	90	93	325.75	-7.66	-9.51	14	13	22	OC[C@H]1O[C@H](O[C@@H]2[C@@H](CO)O[C@@H]([C@@H]([C@H]2O)O)O)[C@@H]([C@H]([C@@H]1O[C@H]1O[C@H](C)[C@H]([C@@H]([C@H]1O)O)[NH2+][C@H]1C[C@H](CO)[C@H]([C@@H]([C@H]1O)O)O)O)O	0	C327H102N78O93+5	valid
1gar	refined	Protein-Ligand	1.96	Ki=100pM	Ki	10	1995	glycinamide ribonucleotide transformylase	U89	P08179	C27H39N7O12PS	716.677	716.212	87	88	359.71	-0.2	1.19	5	11	21	O=C(NCCCCOP(O)(O)O)CSCC(=O)N(c1ccc(cc1)C(=O)N[C@H](C(=O)O)CCC(=O)O)CCCc1c(N)nc([nH]c1=O)N	0	C306H103N86O92S+6	train
1gbt	general	Protein-Ligand	2	Ki=10mM	Ki	2	1994	Bovine beta trypsin	GBS	P00760	C8H10N3O	164.184	164.082	22	22	83.08	1.97	-0.11	0	1	2	O=Cc1ccc(cc1)[NH+]=C(N)N	0	C200H72N53O63S4+3	train
1gca	general	Protein-Ligand	1.7	Kd=0.2uM	Kd	6.7	1993	glucose/galactose-binding protein	GAL	P23905	C6H12O6	180.156	180.063	24	24	110.38	-2.59	-3.22	5	5	6	OC[C@H]1O[C@@H](O)[C@@H]([C@H]([C@H]1O)O)O	0	C272H105N72O90S4+3	train
1gcz	general	Protein-Ligand	1.9	Ki=7.4uM	Ki	5.13	2001	macrophage migration inhibitory factor	YZ9	P14174	C12H10O5	234.205	234.053	27	28	76.74	1.98	1.68	1	3	4	CCOC(=O)c1cc2ccc(cc2oc1=O)O	0	C243H68N54O61S3+4	train
1gfw	general	Protein-Ligand	2.8	Ki=15nM	Ki	7.82	2000	caspase-3 (apopain, p20)	MSI	P42574	C20H22N2O5S	402.464	402.125	50	53	95.53	1.77	3.01	1	4	6	O=C1N(C)c2c([C@@H]1O)cc(cc2)S(=O)(=O)N1CCC[C@H]1COc1ccccc1	0	C237H74N65O72S2+4	train
1gfy	refined	Protein-Ligand	2.13	Ki=8.32uM	Ki	5.08	2000	human protein-tyrosine phosphatases 1B, PTP-1B	COL	P18031	C10H9NO5S2	287.312	286.992	27	28	157.24	3.4	1.33	1	5	2	O=C(C(=O)O)Nc1sc2c(c1C(=O)O)CCSC2	0	C213H69N69O61S3+8	test
1gfz	general	Protein-Ligand	2.3	Ki=0.1mM	Ki	4	2000	glycogen phosphorylase	CFF	P00489	C8H10N4O2	194.191	194.08	24	25	61.82	-0.43	-1.03	0	3	0	Cn1cnc2c1c(=O)n(C)c(=O)n2C	0	C205H63N54O51S+5	train
1ggd	general	Protein-Ligand	1.5	Kd=1.6uM	Kd	5.8	2000	chymotrypsin gamma	FAF	P00766	C17H26N2O3	306.4	306.194	48	48	78.43	1.95	2.04	3	3	11	OC[C@H](Cc1ccccc1)NC(=O)[C@@H](NC(=O)C)CC(C)C	0	C249H91N61O78S5+2	train
1ggn	general	Protein-Ligand	2.36	Ki=3.1uM	Ki	5.51	2000	glycogen phosphorylase	GLS	P00489	C8H13NO5P	234.166	234.053	28	28	116.63	-0.88	0.58	1	5	3	Cc1c(COP(O)(O)O)cnc(c1O)C	0	C301H108N90O87S3+8	train
1ghv	refined	Protein-Ligand	1.85	Ki=45uM	Ki	4.35	2002	thrombin alpha	120	P28504 P00734	C13H12N5O	254.267	254.104	31	33	113.15	2.23	0.08	2	2	2	O=c1[nH]cccc1c1nc2c([nH]1)ccc(c2)C(=[NH2+])N	0	C268H97N67O78S5+5	train
1ghw	refined	Protein-Ligand	1.75	Ki=63uM	Ki	4.2	2002	thrombin alpha	BMZ	P28504 P00734	C14H13N4O	253.279	253.109	32	34	100.52	3.58	1.1	2	2	3	Oc1ccccc1c1nc2c([nH]1)ccc(c2)C(=[NH2+])N	0	C237H89N60O72S5+4	valid
1ghy	refined	Protein-Ligand	1.85	Ki=0.008uM	Ki	8.1	2002	thrombin alpha	121	P28504 P00734	C13H12N5O	254.267	254.104	31	33	113.41	2.55	0.5	2	3	3	Oc1cccnc1c1nc2c([nH]1)cc(cc2)C(=[NH2+])N	1	C281H104N67O80S5Zn2+5	valid
1ghz	refined	Protein-Ligand	1.39	Ki=16uM	Ki	4.8	2002	trypsin beta	120	P00760	C13H12N5O	254.267	254.104	31	33	113.15	2.23	0.08	2	2	2	O=c1[nH]cccc1c1nc2c([nH]1)ccc(c2)C(=[NH2+])N	0	C237H83N62O75S5+3	train
1gi1	refined	Protein-Ligand	1.42	Ki=3.4uM	Ki	5.47	2002	trypsin beta	BMZ	P00760	C14H13N4O	253.279	253.109	32	34	100.52	3.58	1.1	2	2	3	Oc1ccccc1c1nc2c([nH]1)ccc(c2)C(=[NH2+])N	0	C219H80N59O66S5+4	test
1gi4	refined	Protein-Ligand	1.37	Ki=0.065uM	Ki	7.19	2002	trypsin beta	122	P00760	C14H13N4O	253.279	253.109	32	34	100.52	3.58	1.1	2	2	3	Oc1ccccc1c1nc2c([nH]1)cc(cc2)C(=[NH2+])N	1	C213H82N56O67S5Zn+4	valid
1gi6	general	Protein-Ligand	1.49	Ki=0.60uM	Ki	6.22	2002	trypsin beta	124	P00760	C15H14N3O	252.291	252.114	33	35	87.63	4.14	1.71	2	1	3	Oc1ccccc1c1cc2c([nH]1)ccc(c2)C(=[NH2+])N	0	C241H85N63O77S5+3	train
1gi7	refined	Protein-Ligand	1.79	Ki=31uM	Ki	4.51	2002	urokinase-type plasminogen activator	120	P00749	C13H12N5O	254.267	254.104	31	33	113.15	2.23	0.08	2	2	2	O=c1[nH]cccc1c1nc2c([nH]1)ccc(c2)C(=[NH2+])N	0	C232H90N60O70S3+6	train
1gi8	general	Protein-Ligand	1.75	Ki=8.9uM	Ki	5.05	2002	urokinase-type plasminogen activator	BMZ	P00749	C14H13N4O	253.279	253.109	32	34	100.52	3.58	1.1	2	2	3	Oc1ccccc1c1nc2c([nH]1)cc(cc2)C(=[NH2+])N	0	C245H97N64O73S5+5	train
1gi9	general	Protein-Ligand	1.8	Ki=6.0uM	Ki	5.22	2002	urokinase-type plasminogen activator	123	P00749	C15H15N4O2	283.305	283.12	36	38	109.75	3.55	1.11	2	2	4	COc1ccc(c(c1)c1nc2c([nH]1)cc(cc2)C(=[NH2+])N)O	0	C258H98N70O78S5+6	valid
1gj4	general	Protein-Ligand	1.81	Ki=85uM	Ki	4.07	2002	thrombin alpha	132	P28504 P00734	C21H17ClN3O	362.832	362.106	43	46	87.63	6.4	4.03	2	1	4	Oc1c(cccc1c1ccccc1)c1[nH]c2c(c1)cc(c(c2)Cl)C(=[NH2+])N	0	C320H101N76O89S6+4	test
1gj5	general	Protein-Ligand	1.73	Ki=11uM	Ki	4.96	2002	thrombin	130	P28504 P00734	C20H17N4O	329.375	329.14	42	45	100.52	5.21	2.77	2	2	4	Oc1c(cccc1c1nc2c([nH]1)cc(cc2)C(=[NH2+])N)c1ccccc1	0	C301H99N75O87S4+6	valid
1gj6	refined	Protein-Ligand	1.5	Ki=0.10uM	Ki	7	2002	trypsin beta	132	P00760	C21H17ClN3O	362.832	362.106	43	46	87.63	6.4	4.03	2	1	4	Oc1c(cccc1c1ccccc1)c1[nH]c2c(c1)cc(c(c2)Cl)C(=[NH2+])N	0	C215H75N58O69S4+4	valid
1gj7	general	Protein-Ligand	1.5	Ki=0.013uM	Ki	7.89	2002	urokinase-type plasminogen activator	132	P00749	C21H17ClN3O	362.832	362.106	43	46	87.63	6.4	4.03	2	1	4	Oc1c(cccc1c1ccccc1)c1[nH]c2c(c1)cc(c(c2)Cl)C(=[NH2+])N	0	C283H110N75O88S5+6	train
1gj8	general	Protein-Ligand	1.64	Ki=0.11uM	Ki	6.96	2002	urokinase-type plasminogen activator	133	P00749	C18H20FN4O2	343.375	343.157	45	47	109.75	4.98	2.27	2	2	6	CC(COc1cccc(c1O)c1[nH]c2c(n1)cc(c(c2)C(=[NH2+])N)F)C	0	C273H91N73O78S4+8	train
1gja	general	Protein-Ligand	1.56	Ki=3.8uM	Ki	5.42	2002	urokinase-type plasminogen activator	135	P00749	C14H14N3O2	256.28	256.109	33	34	100.94	3.74	0.88	2	2	5	O=C(c1ccccc1O)Nc1ccc(cc1)C(=[NH2+])N	0	C251H95N64O73S5+5	valid
1gjb	general	Protein-Ligand	1.9	Ki=0.45uM	Ki	6.35	2002	urokinase-type plasminogen activator	130	P00749	C20H17N4O	329.375	329.14	42	45	100.52	5.21	2.77	2	2	4	Oc1c(cccc1c1nc2c([nH]1)cc(cc2)C(=[NH2+])N)c1ccccc1	0	C255H92N65O77S4+5	train
1gjc	refined	Protein-Ligand	1.73	Ki=0.45uM	Ki	6.35	2002	urokinase-type plasminogen activator	130	P00749	C20H17N4O	329.375	329.14	42	45	100.52	5.21	2.77	2	2	4	Oc1c(cccc1c1nc2c([nH]1)cc(cc2)C(=[NH2+])N)c1ccccc1	0	C284H100N72O79S5+6	train
1gjd	general	Protein-Ligand	1.75	Ki=6.0uM	Ki	5.22	2002	urokinase-type plasminogen activator	136	P00749	C15H14ClIN3O2	430.648	429.982	36	37	100.94	5.38	2.45	2	2	5	Cc1cc(I)c(c(c1)C(=O)Nc1ccc(c(c1)Cl)C(=[NH2+])N)O	0	C264H100N67O77S5+5	train
1gmy	general	Protein-Ligand	1.9	IC50=45nM	IC50	7.35	2002	cathepsin b	3-mer	P07858	C26H27N3O2	413.511	413.21	58	60	82.05	4.15	4.5	2	2	11	N=CCNC(=O)[C@@H](NC(=O)C(c1ccccc1)c1ccccc1)Cc1cccc(c1)C	0	C205H65N54O65S8+	test
1gni	general	Protein-Ligand	2.4	Kd=8.5nM	Kd	8.07	2002	serum albumin	OLA	P02768	C18H34O2	282.461	282.256	54	53	37.3	8.71	6.11	0	2	14	CCCCCCCC/C=C\CCCCCCCC(=O)O	0	C356H94N90O88S+13	test
1gnj	general	Protein-Ligand	2.6	Kd=91nM	Kd	7.04	2002	serum albumin	ACD	P02768	C20H32O2	304.467	304.24	54	53	37.3	7.73	6.22	0	2	13	CCCCC/C=C\C/C=C\C/C=C\C/C=C\CCCC(=O)O	0	C363H101N96O90S2+14	test
1gnm	refined	Protein-Ligand	2.3	Ki=560nM	Ki	6.25	1996	HIV-1 protease	U0E	P03366	C28H53N8O6	597.77	597.409	95	95	259.72	1.89	1.31	6	6	23	NC(=O)CC[C@@H](C(=O)N[C@H](C(=O)N)CCC[NH+]=C(N)N)NC(=O)[C@H](C(C)C)C[C@@H]([C@@H](NC(=O)C)CC1CCCCC1)O	0	C338H111N91O99S2+6	train
1gnn	refined	Protein-Ligand	2.3	Ki=2100nM	Ki	5.68	1996	HIV-1 protease	U0E	P03366	C28H53N8O6	597.77	597.409	95	95	259.72	1.89	1.31	6	6	23	NC(=O)CC[C@@H](C(=O)N[C@H](C(=O)N)CCC[NH+]=C(N)N)NC(=O)[C@H](C(C)C)C[C@@H]([C@@H](NC(=O)C)CC1CCCCC1)O	0	C289H97N79O90S+5	train
1gno	refined	Protein-Ligand	2.3	Ki=20nM	Ki	7.7	1996	HIV-1 protease	U0E	P03366	C28H53N8O6	597.77	597.409	95	95	259.72	1.89	1.31	6	6	23	NC(=O)CC[C@@H](C(=O)N[C@H](C(=O)N)CCC[NH+]=C(N)N)NC(=O)[C@H](C(C)C)C[C@@H]([C@@H](NC(=O)C)CC1CCCCC1)O	0	C300H99N82O89S+5	test
1gny	general	Protein-Ligand	1.63	Kd=73uM	Kd	4.14	2001	xylanase	5-mer	Q59675	C25H42O21	678.588	678.222	88	92	325.83	-8.63	-8.73	12	12	20	O[C@H]1[C@@H](OC[C@H]([C@@H]1O)O[C@@H]1OC[C@H]([C@@H]([C@H]1O)O)O[C@@H]1OC[C@H]([C@@H]([C@H]1O)O)O)O[C@@H]1CO[C@H]([C@@H]([C@H]1O)O)O[C@@H]1CO[C@H]([C@@H]([C@H]1O)O)O	0	C186H58N56O62S+4	train
1gpk	refined	Protein-Ligand	2.1	Ki=4.3uM	Ki	5.37	2002	acetylcholinesterase	HUP	P04058	C15H19N2O	243.324	243.15	37	39	60.5	0.01	1.28	2	1	0	C/C=C/1\[C@@H]2C=C(C[C@@]1([NH3+])c1c(C2)[nH]c(=O)cc1)C	0	C361H107N77O96S2+	test
1gpn	refined	Protein-Ligand	2.35	Ki=0.334uM	Ki	6.48	2002	acetylcholinesterase	HUB	P04058	C16H21N2O	257.351	257.165	40	43	49.47	0.63	2.64	2	1	0	CC1=C[C@H]2Cc3c([C@@]4(C1)[C@@H]2CCC[NH2+]4)ccc(=O)[nH]3	0	C363H109N80O97S2+	train
1gpy	general	Protein-Ligand	2.4	Kd=20uM	Kd	4.7	1993	glycogen phosphorylase b	G6P	P00489	C6H14O9P	261.144	261.038	30	30	173.66	-4.4	-3.54	4	7	6	O[C@H]1O[C@H](COP(O)(O)O)[C@H]([C@@H]([C@H]1O)O)O	0	C295H90N87O74S+12	train
1gqs	general	Protein-Ligand	3	Ki=0.5uM	Ki	6.3	2002	acetylcholinesterase	SAF	P04058	C10H16NO	166.24	166.123	28	28	24.67	1.8	0.6	2	1	3	C[NH+]([C@H](c1cccc(c1)O)C)C	0	C342H106N72O91S2	valid
1grp	refined	Protein-Ligand	2.5	Ki=0.189mM	Ki	3.72	1996	isocitrate dehydrogenase	ICT	P08200	C6H8O7	192.124	192.027	21	20	132.13	1.73	-1.39	1	7	3	OC(=O)C[C@@H]([C@H](C(=O)O)O)C(=O)O	1	C206H97MgN62O63S+6	test
1gsf	general	Protein-Ligand	2.7	IC50~10uM	IC50	5	1995	glutathione s-transferase a1-1	EAA	P08263	C13H12Cl2O4	303.138	302.011	31	31	63.6	4.71	3.61	0	3	5	CCC(=C)C(=O)c1ccc(c(c1Cl)Cl)OCC(=O)O	0	C240H79N69O58S4+8	train
1gsz	general	Protein-Ligand	2.8	IC50=61nM	IC50	7.21	2003	squalene-hopene cyclase	R71	P33247	C23H28BrFNO2	449.376	448.129	56	57	30.74	6.14	4.46	1	1	12	C=CC[N@H+](CCCCCCOc1ccc(c(c1)F)C(=O)c1ccc(cc1)Br)C	0	C518H165N118O138S3+5	train
1gt1	general	Protein-Ligand	1.71	Kd=1uM	Kd	6	2003	odorant-binding protein	ANC	P07435	C14H11N	193.244	193.089	26	28	26.02	3.74	4.16	1	0	0	Nc1cccc2c1cc1ccccc1c2	0	C334H101N74O80+7	train
1gt3	general	Protein-Ligand	1.8	Kd=0.35uM	Kd	6.46	2003	odorant-binding protein	DHM	P07435	C10H22O	158.281	158.167	33	32	20.23	3.29	2.97	1	1	6	CC[C@@H](CCCC(O)(C)C)C	0	C333H98N75O83+7	test
1gt4	general	Protein-Ligand	2.1	Kd=0.3uM	Kd	6.52	2003	odorant-binding protein	UNA	P07435	C11H22O	170.292	170.167	34	33	17.07	4.34	3.72	0	1	9	CCCCCCCCCCC=O	0	C340H106N73O85+5	test
1gt5	general	Protein-Ligand	2.08	Kd=0.8uM	Kd	6.1	2003	odorant-binding protein	BZQ	P07435	C13H12O	184.234	184.089	26	27	20.23	2.73	2.77	1	1	3	OC(c1ccccc1)c1ccccc1	0	C318H116N72O78+6	train
1gu1	general	Protein-Ligand	1.8	Ki=30uM	Ki	4.52	2002	3-dehydroquinate dehydratase	FA1	P15474	C7H10O5	174.151	174.053	22	22	97.99	-0.64	-1.52	3	5	3	O[C@@H]1C=C[C@@](C[C@H]1O)(O)C(=O)O	0	C243H86N73O68S+6	train
1gu3	general	Protein-Ligand	2.3	Kd=47.6uM	Kd	4.32	2002	endoglucanase c	5-mer	P14090	C30H52O26	828.718	828.275	108	112	426.98	-11.17	-11.92	17	17	30	OC[C@H]1O[C@@H](O[C@@H]2[C@@H](CO)O[C@H]([C@@H]([C@H]2O)O)O[C@@H]2[C@@H](CO)O[C@H]([C@@H]([C@H]2O)O)O)[C@@H]([C@H]([C@@H]1O[C@@H]1O[C@H](CO)[C@H]([C@@H]([C@H]1O)O)O[C@@H]1O[C@H](CO)[C@H]([C@@H]([C@H]1O)O)O)O)O	0	C210H59N55O60+	test
1gui	general	Protein-Ligand	1.9	Kd=0.53uM	Kd	6.28	2002	laminarinase 16a	6-mer	Q9WXN1	C36H62O31	990.859	990.328	129	134	506.13	-10.56	-14.1	20	20	36	OC[C@H]1O[C@@H](O[C@H]2[C@H](O)[C@@H](CO)O[C@H]([C@@H]2O)O[C@@H]2[C@@H](O)[C@H](O)O[C@@H]([C@H]2O)CO)[C@@H]([C@H]([C@@H]1O)O[C@@H]1O[C@H](CO)[C@H]([C@@H]([C@H]1O)O[C@@H]1O[C@H](CO)[C@H]([C@@H]([C@H]1O)O[C@@H]1O[C@H](CO)[C@H]([C@@H]([C@H]1O)O)O)O)O)O	0	C224H83N61O69+2	valid
1gvk	general	Protein-Ligand	0.94	Ki=0.89mM	Ki	3.05	2002	elastase	4-mer	P00772	C17H28N4O5	368.428	368.206	54	54	138.67	-0.93	0.51	3	5	12	CC[C@@H]([C@H](NC(=O)[C@@H]1CCCN1C(=O)[C@@H](NC(=O)C)CC(=O)N)C=O)C	0	C205H78N62O69S4+4	test
1gvu	general	Protein-Ligand	0.94	Ki=1nM	Ki	9	2002	endothiapepsin	10-mer	P01017 P11838	C39H61N8O8	769.95	769.461	116	118	248.32	1.53	3.45	8	9	27	CC[C@@H]([C@@H](C(=O)O)NC(=O)[C@H](C(C)C)NC(=O)C[C@@H]([C@@H](NC(=O)[C@H](Cc1cnc[nH]1)NC(=O)[C@H](Cc1ccccc1)NC(=O)[C@@H]1CCC[NH2+]1)CC(C)C)O)C	0	C430H145N98O145+	train
1gvw	refined	Protein-Ligand	1	Ki=110nM	Ki	6.96	2002	endothiapepsin	0EM	P11838	C32H52N6O7P	663.765	663.364	98	99	208.36	3.24	4.62	5	7	23	CC[C@@H](CNC(=O)CP([C@@H](NC(=O)[C@H](Cc1cnc[nH]1)NC(=O)[C@H](Cc1ccccc1)NC(=O)OC(C)(C)C)CC(C)C)(O)O)C	0	C371H129N84O125S+	test
1gvx	refined	Protein-Ligand	1	Ki=60nM	Ki	7.22	2002	endothiapepsin	6-mer	P11838	C43H65N10O12	914.036	913.478	130	132	376.86	0.3	-1.19	8	12	32	OC(=O)CC[C@@H](C(=O)N[C@@H](Cc1ccccc1)C[NH2+][C@H](C(=O)N[C@H](C(=O)N[C@H](C(=O)O)CCC(=O)O)CCC[NH+]=C(N)N)Cc1ccccc1)NC(=O)[C@H]([C@H](O)C)NC(=O)[C@H]1[NH2+]CCC1	0	C372H117N85O129+	train
1gwm	general	Protein-Ligand	1.15	Kd=80uM	Kd	4.1	2003	non-catalytic protein 1	6-mer	Q9C171	C36H62O31	990.859	990.328	129	134	506.13	-13.32	-14.1	20	20	36	OC[C@H]1O[C@@H](O[C@@H]2[C@@H](CO)O[C@H]([C@@H]([C@H]2O)O)O[C@@H]2[C@@H](CO)O[C@@H]([C@@H]([C@H]2O)O)O)[C@@H]([C@H]([C@@H]1O[C@@H]1O[C@H](CO)[C@H]([C@@H]([C@H]1O)O)O[C@@H]1O[C@H](CO)[C@H]([C@@H]([C@H]1O)O)O[C@@H]1O[C@H](CO)[C@H]([C@@H]([C@H]1O)O)O)O)O	0	C216H63N58O72S+6	train
1gwq	general	Protein-Ligand	2.45	Kd=76nM	Kd	7.12	2002	estrogen receptor	9-mer	P03372 Q15596	C47H85N15O11	1036.27	1035.66	158	158	435.52	0.65	0.38	11	12	41	CC[C@@H]([C@@H](C(=O)N[C@H](C(=O)N[C@H](C(=O)N[C@H](C(=O)N[C@H](C(=O)N[C@H](C(=O)N[C@H](C(=O)N[C@H](C(=O)O)C)CCC(=O)N)CC(C)C)CC(C)C)CCC[NH+]=C(N)N)Cc1[nH]cnc1)CC(C)C)NC(=O)[C@@H]([NH3+])C)C	0	C234H68N60O63S3+4	valid
1gwr	general	Protein-Ligand	2.4	Kd=250nM	Kd	6.6	2002	estrogen receptor	12-mer	P03372 Q15596	C47H79N10O13	992.189	991.583	149	149	381.29	0.3	1.82	12	13	40	OC[C@@H](NC(=O)[C@@H](NC(=O)[C@@H](NC(=O)[C@@H](NC(=O)[C@@H](NC(=O)[C@@H](NC(=O)[C@@H](NC(=O)[C@@H](NC(=O)[C@H](CC(=O)N)[NH3+])C)CC(C)C)CC(C)C)C)Cc1ccc(cc1)O)CC(C)C)CC(C)C)CC(=O)O	0	C227H63N57O56S3+4	test
1gwv	refined	Protein-Ligand	2.5	Kd=2.68mM	Kd	2.57	2003	n-acetyllactosaminide	LAT	P14769	C12H22O11	342.296	342.116	45	46	189.53	-4.73	-5.4	8	8	12	OC[C@H]1O[C@@H](O)[C@@H]([C@H]([C@@H]1O[C@@H]1O[C@H](CO)[C@@H]([C@@H]([C@H]1O)O)O)O)O	1	C299H95MnN77O81S2+6	train
1gww	general	Protein-Ligand	1.8	Kd=0.258mM	Kd	3.59	2003	n-acetyllactosaminide	UDP	P14769	C9H16N2O12P2	406.177	406.018	41	42	251.34	-5.29	-3.49	3	9	7	O[C@@H]1[C@@H](COP(OP(O)(O)O)(O)O)O[C@H]([C@@H]1O)n1ccc(=O)[nH]c1=O	1	C342H109MnN91O89S6+8	test
1gx0	general	Protein-Ligand	1.8	Kd=0.060mM	Kd	4.22	2003	n-acetyllactosaminide	UDP	P14769	C9H18N2O12P2	408.193	408.033	43	44	245.89	-5.46	-3.01	3	9	7	O=C1CCN(C(=O)N1)[C@@H]1O[C@@H]([C@H]([C@H]1O)O)COP(OP(O)(O)O)(O)O	1	C369H115MnN96O95S6+8	valid
1gx4	general	Protein-Ligand	1.46	Kd=53uM	Kd	4.28	2003	n-acetyllactosaminide	UDP	P14769	C9H16N2O12P2	406.177	406.018	41	42	251.34	-5.29	-3.49	3	9	7	O[C@@H]1[C@@H](COP(OP(O)(O)O)(O)O)O[C@H]([C@@H]1O)n1ccc(=O)[nH]c1=O	1	C322H104MnN86O84S5+8	train
1gx8	refined	Protein-Ligand	2.4	Kd=0.43uM	Kd	6.37	2002	bovine beta-lactoglobulin	RTL	P02754	C20H30O	286.452	286.23	51	51	20.23	5.74	5.51	1	1	6	OC/C=C(/C=C/C=C(/C=C/C1=C(C)CCCC1(C)C)\C)\C	0	C383H122N92O102S6+8	train
1gym	general	Protein-Ligand	2.2	IC50=2mM	IC50	2.7	1996	phosphatidylinositol-specific phospholipase c	MYG	P14262	C12H24NO10	342.32	342.14	47	48	207.94	-5.56	-6.76	9	8	11	OC[C@H]1O[C@H](O[C@@H]2[C@@H](O)[C@H](O)[C@H]([C@H]([C@H]2O)O)O)[C@@H]([C@H]([C@@H]1O)O)[NH3+]	0	C249H90N66O69+8	train
1gyx	refined	Protein-Ligand	1.35	Ki=3.3mM	Ki	2.48	2002	hypothetical protein ydce	BEZ	P31992	C7H6O2	122.121	122.037	15	15	37.3	2.53	1.38	0	2	0	OC(=O)c1ccccc1	0	C181H59N47O44S2+5	train
1gyy	refined	Protein-Ligand	1.35	Ki=230uM	Ki	3.64	2002	hypothetical protein ydce	FHC	P31992	C9H7FO3	182.148	182.038	20	20	57.53	2.71	1.79	1	3	2	Oc1ccc(cc1)/C=C(\C(=O)O)/F	0	C194H61N50O50S2+5	train
1gz3	general	Protein-Ligand	2.3	Ki=0.20mM	Ki	3.7	2003	nad-dependent malic enzyme	ATP	P23368	C10H19N5O13P3	510.205	510.019	50	52	329.38	-6.07	-2.36	3	12	9	O[C@@H]1[C@@H](COP(OP(OP(O)(O)O)(O)O)(O)O)O[C@H]([C@@H]1O)n1cnc2c1ncnc2N	1	C363H127MnN99O113S+5	train
1gz4	general	Protein-Ligand	2.2	Ki=0.2mM	Ki	3.7	2002	nad-dependent malic enzyme	ATP	P23368	C10H19N5O13P3	510.205	510.019	50	52	329.38	-6.07	-2.36	3	12	9	O[C@@H]1[C@@H](COP(OP(OP(O)(O)O)(O)O)(O)O)O[C@H]([C@@H]1O)n1cnc2c1ncnc2N	1	C384H129MnN100O119Se+4	train
1gz9	general	Protein-Ligand	1.7	Kd=0.31mM	Kd	3.51	2002	lectin	FUC-LAT	P83410	C18H32O15	488.438	488.174	65	67	248.45	-5.83	-6.55	10	10	16	OC[C@H]1O[C@@H](O[C@@H]2[C@@H](CO)O[C@H]([C@@H]([C@H]2O)O)O)[C@@H]([C@H]([C@H]1O)O)O[C@@H]1O[C@@H](C)[C@H]([C@H]([C@@H]1O)O)O	1	C188H61CaN57O61+3	train
1gzc	general	Protein-Ligand	1.58	Kd=0.32mM	Kd	3.49	2002	lectin	LAT	P83410	C12H22O11	342.296	342.116	45	46	189.53	-4.73	-5.4	8	8	12	OC[C@H]1O[C@@H](O)[C@@H]([C@H]([C@@H]1O[C@@H]1O[C@H](CO)[C@@H]([C@@H]([C@H]1O)O)O)O)O	1	C160H53CaN42O51+2	test
1gzg	general	Protein-Ligand	1.66	IC50=0.9mM	IC50	3.05	2002	aminolevulinic acid dehydratase	LAF	Q59643	C5H7FO3	134.106	134.038	16	15	54.37	1.2	0.39	0	3	3	OC(=O)CCC(=O)CF	0	C223H81N54O62S2+5	train
1h00	general	Protein-Ligand	1.6	IC50=38uM	IC50	4.42	2003	cell division protein kinase 2	FCP/FAP	P24941	C21H24F2N5O2	416.444	416.19	54	56	83.74	3.55	2.27	4	3	10	O[C@@H](C[NH+](C)C)COc1ccc(cc1)Nc1ncnc(c1)Nc1c(F)cccc1F	0	C296H81N70O70S+10	train
1h01	general	Protein-Ligand	1.79	IC50=22uM	IC50	4.66	2003	cell division protein kinase 2	FAL	P24941	C21H24Cl2N5O2	449.354	448.131	54	56	83.74	4.6	3.3	4	3	10	C[NH+](C[C@@H](COc1ccc(cc1)Nc1nccc(n1)Nc1cc(Cl)ccc1Cl)O)C	0	C313H93N73O84S+7	test
1h08	general	Protein-Ligand	1.8	IC50=28uM	IC50	4.55	2003	cell division protein kinase 2	BYP	P24941	C21H25BrN5O2	459.36	458.119	54	56	83.74	4.04	2.76	4	3	10	C[NH+](C[C@H](COc1ccc(cc1)Nc1ncc(c(n1)Nc1ccccc1)Br)O)C	0	C308H87N73O81S+8	test
1h0a	refined	Protein-Ligand	1.7	Kd=3.6uM	Kd	5.44	2002	epsin	I3P	O88339	C6H18O15P3	423.119	422.986	42	42	311.22	-7.48	-4.8	3	12	6	O[C@@H]1[C@@H](OP(O)(O)O)[C@H](OP(O)(O)O)[C@H]([C@@H]([C@@H]1O)OP(O)(O)O)O	0	C183H60N66O53S3+13	valid
1h0r	general	Protein-Ligand	2.1	Ki=200uM	Ki	3.7	2003	Type II Dehydroquinase from Mycobacterium Tuberculosis	FA1	P9WPX7	C7H10O5	174.151	174.053	22	22	97.99	-0.64	-1.52	3	5	3	O[C@@H]1C=C[C@@](C[C@H]1O)(O)C(=O)O	0	C246H81N77O67+9	train
1h0w	general	Protein-Ligand	2.1	IC50=13uM	IC50	4.89	2003	cell division protein kinase 2	207	P24941	C13H16N4O	244.292	244.132	34	36	76.82	2.14	2.86	2	2	3	Nc1nc(OC[C@H]2CCC=CC2)c2c(c1)[nH]cn2	0	C277H77N66O68+9	train
1h1b	general	Protein-Ligand	2	Ki=0.16nM	Ki	9.8	2002	elastase	151	P08246	C19H31N4O5S	427.538	427.202	60	62	122.4	0.66	2.44	2	5	9	O=C[C@H]([C@H]1[C@@H](CCN1C(=O)c1coc(n1)C[NH+]1CCCC1)NS(=O)(=O)C)C(C)C	0	C250H89N77O72S4+6	valid
1h1d	general	Protein-Ligand	2	Ki=6.0nM	Ki	8.22	2003	catechol o-methyltransferase	BIA	P22734	C20H21F3N3O5	440.393	440.143	52	54	111.03	3.72	4.16	3	5	7	O=C(c1cc(O)c(c(c1)N(=O)=O)O)CC[NH+]1CCN(CC1)c1cccc(c1)C(F)(F)F	1	C213H71MgN49O57S3+5	train
1h1p	general	Protein-Ligand	2.1	Ki=12uM	Ki	4.92	2002	cyclin dependent kinase 2	CMG	P20248 P24941	C12H17N5O	247.296	247.143	35	37	89.71	2.43	2.48	2	3	3	Nc1nc(OCC2CCCCC2)c2c(n1)[nH]cn2	0	C311H89N75O77+10	train
1h1q	general	Protein-Ligand	2.5	IC50=1.0uM	IC50	6	2002	cell division protein kinase 2	2A6	P20248 P24941	C18H21N5O	323.392	323.175	45	48	75.72	4.65	4.13	2	3	5	C1CCC(CC1)COc1nc(Nc2ccccc2)nc2c1nc[nH]2	0	C307H84N73O77+9	test
1h1r	general	Protein-Ligand	2	IC50=2.3uM	IC50	5.64	2002	cell division protein kinase 2	6CP	P20248 P24941	C18H20ClN5O	357.837	357.136	45	48	75.72	5.28	4.78	2	3	5	Clc1cccc(c1)Nc1nc(OCC2CCCCC2)c2c(n1)[nH]cn2	0	C307H84N73O77+9	valid
1h1s	refined	Protein-Ligand	2	Ki=6nM	Ki	8.22	2002	cyclin dependent kinase 2	4SP	P20248 P24941	C18H22N6O3S	402.471	402.147	50	53	144.26	3.22	4.56	3	5	6	NS(=O)(=O)c1ccc(cc1)Nc1nc(OCC2CCCCC2)c2c(n1)[nH]cn2	0	C307H84N73O77+9	valid
1h22	refined	Protein-Ligand	2.15	Ki=0.8nM	Ki	9.1	2002	acetylcholinesterase	E10	P04058	C28H44N4O2	468.675	468.346	78	81	98.94	3.21	2.77	4	2	13	O=c1ccc2c([nH]1)CCC[C@@H]2[NH2+]CCCCCCCCCC[NH2+][C@H]1CCCc2c1ccc(=O)[nH]2	0	C438H129N97O123S2+	train
1h23	refined	Protein-Ligand	2.15	Ki=4.5nM	Ki	8.35	2002	acetylcholinesterase	E12	P04058	C30H48N4O2	496.728	496.378	84	87	98.94	4.29	3.55	4	2	15	O=c1ccc2c([nH]1)CCC[C@@H]2[NH2+]CCCCCCCCCCCC[NH2+][C@H]1CCCc2c1ccc(=O)[nH]2	0	C471H139N108O134S2+2	train
1h24	general	Protein-Ligand	2.5	Kd=0.5uM	Kd	6.3	2003	cell division protein kinase 2	9-mer	Q01094 P20248 P24941	C49H92N16O13	1113.35	1112.7	170	170	500.74	-0.05	-1.94	10	13	45	[NH3+]CCCC[C@@H](C(=O)N[C@H](C(=O)N[C@H](C(=O)N[C@H](C(=O)N[C@H](C(=O)N[C@H](C(=O)N[C@@H](CCC(=O)O)C=O)CC(C)C)CC(=O)O)CC(C)C)CCC[NH+]=C(N)N)CCC[NH+]=C(N)N)NC(=O)[C@H](C(C)C)NC(=O)[C@H]1[NH2+]CCC1	0	C215H77N50O71S+2	valid
1h25	general	Protein-Ligand	2.5	Kd=1.8uM	Kd	5.74	2003	phospho-CDK2/cyclin A	11-mer	P06400 P20248 P24941	C59H105N16O13	1246.56	1245.8	193	195	493.25	-0.73	-1.12	12	13	49	[NH3+]CCCC[C@@H](C(=O)N[C@H](C(=O)N[C@H](C(=O)N[C@H](C(=O)N[C@H](C(=O)O)CC(=O)O)Cc1ccccc1)CCC[NH+]=C(N)N)CC(C)C)NC(=O)[C@@H](NC(=O)[C@@H](NC(=O)[C@@H]1CCCN1C(=O)[C@@H](NC(=O)[C@H]1[NH2+]CCC1)CCCC[NH3+])CC(C)C)CCCC[NH3+]	0	C265H78N70O79S2+6	train
1h26	general	Protein-Ligand	2.24	Kd=2.9uM	Kd	5.54	2003	phospho-CDK2/cyclin A	11-mer	P20248 P24941 P04637	C53H96N17O11S	1179.5	1178.72	178	179	520.88	-1.68	-3.54	14	12	51	[NH3+]CCCC[C@@H](C(=O)N[C@H](C(=O)N[C@H](C(=O)N[C@H](C(=O)N[C@H](C(=O)O)CCCC[NH3+])Cc1ccccc1)CCSC)CC(C)C)NC(=O)[C@@H](NC(=O)[C@@H](NC(=O)[C@@H](NC(=O)[C@H](CO)[NH3+])CCC[NH+]=C(N)N)Cc1nc[nH]c1)CCCC[NH3+]	0	C265H80N65O82S2+3	test
1h27	general	Protein-Ligand	2.2	Kd=2.5uM	Kd	5.6	2003	phospho-CDK2/cyclin A	11-mer	P20248 P24941 P46527	C32H52N10O8	704.817	704.397	102	103	310.75	-1.18	-1.86	6	8	24	CC(C[C@@H](C(=O)N[C@H](C(=O)NCC(=O)N1CCC[C@H]1C(=O)O)Cc1ccccc1)NC(=O)[C@@H](NC(=O)[C@H](CCC[NH+]=C(N)N)[NH3+])CC(=O)N)C	0	C257H81N62O81S+3	train
1h28	general	Protein-Ligand	2.8	Kd=0.3uM	Kd	6.52	2003	phospho-CDK2/cyclin A	11-mer	P28749 P20248 P24941	C48H85N17O14	1124.29	1123.65	164	164	544.03	-3.11	-5.53	12	14	47	OC[C@@H](C(=O)N[C@H](C(=O)N[C@H](C(=O)N[C@H](C(=O)N[C@H](C(=O)N[C@H](C(=O)N[C@H](C(=O)NCC(=O)N[C@H](C(=O)O)CCC(=O)O)Cc1ccccc1)CC(C)C)CCC[NH+]=C(N)N)CCC[NH+]=C(N)N)CCCC[NH3+])C)NC(=O)C[NH3+]	0	C278H81N69O81S+6	test
1h2k	refined	Protein-Ligand	2.15	Ki=1.2mM	Ki	2.92	2002	FACTOR INHIBITING HIF-1 ALPHA WITH a HIF-1 ALPHA FRAGMENT PEPTIDE	OGA	Q9NWT6 Q16665	C4H5NO5	147.086	147.017	15	14	103.7	0.63	-1.34	1	5	2	OC(=O)CNC(=O)C(=O)O	1	C279H90FeN73O69S+6	train
1h2t	refined	Protein-Ligand	2.15	Kd=13nM	Kd	7.89	2002	80 kda nuclear cap binding protein	GDP-7MG	P52298 Q09161	C21H34N10O18P3	807.472	807.127	86	91	466.29	-8.65	-4.31	8	13	16	Nc1[nH]c(=O)c2c(n1)N(CN2C)[C@@H]1O[C@@H]([C@H]([C@H]1O)O)COP(OP(OP(OC[C@H]1O[C@H]([C@@H]([C@@H]1O)O)n1cnc2c1nc(N)[nH]c2=O)(O)O)(O)O)(O)O	0	C323H89N99O94S2+11	train
1h2u	general	Protein-Ligand	2.4	Kd=13nM	Kd	7.89	2002	80 kda nuclear cap binding protein	GDP-7MG	P52298 Q09161	C21H33N10O18P3	806.464	806.119	85	90	469.67	-8.97	-3.9	8	13	16	Nc1[nH]c(=O)c2c(n1)n(cn2)[C@@H]1O[C@@H]([C@H]([C@H]1O)O)COP(OP(OP(OC[C@H]1O[C@H]([C@@H]([C@@H]1O)O)n1cn(c2c1nc(N)[nH]c2=O)C)(O)O)(O)O)(O)O	0	C274H76N88O81S3+10	train
1h35	general	Protein-Ligand	2.8	IC50=29nM	IC50	7.54	2003	squalene-hopene cyclase	R01	P33247	C24H23BrNO	421.35	420.096	50	52	21.51	6.06	4.55	1	1	7	C=CC[N@@H+](Cc1ccc(cc1)c1ccc(cc1)C(=O)c1ccc(cc1)Br)C	0	C464H152N104O126S2+4	train
1h36	general	Protein-Ligand	2.8	IC50=18nM	IC50	7.74	2003	squalene-hopene cyclase	R88	P33247	C21H23BrNO2	401.317	400.091	48	50	30.74	4.83	3.29	1	1	8	O=C(c1ccc(cc1)Br)c1ccc(cc1)OC/C=C/C[N@@H+](C1CC1)C	0	C470H152N106O128S2+4	train
1h37	general	Protein-Ligand	2.8	IC50=59nM	IC50	7.23	2003	squalene-hopene cyclase	R02	P33247	C24H27BrNO2	441.381	440.123	55	58	30.74	5.81	3.93	1	1	10	C=CC[N@H+](C1CC1)C[C@H]1C[C@@H]1COc1ccc(cc1)C(=O)c1ccc(cc1)Br	0	C468H154N106O127S2+4	train
1h39	general	Protein-Ligand	2.8	IC50=289nM	IC50	6.54	2003	squalene-hopene cyclase	R03	P33247	C24H31BrN3O	457.426	456.165	60	62	31.49	6	4.64	1	1	11	C=CC[N@H+](CCCCCCOc1ccc2c(c1)n(C)nc2c1ccc(cc1)Br)C	0	C536H167N120O143S3+5	train
1h3a	general	Protein-Ligand	2.85	IC50=281nM	IC50	6.55	2003	squalene-hopene cyclase	R04	P33247	C22H24BrFN3O	445.348	444.109	52	54	31.49	4.99	3.78	1	1	8	C=CC[N@H+](C/C=C/COc1cc2n(C)nc(c2cc1F)c1ccc(cc1)Br)C	0	C473H151N106O129S3+4	train
1h3b	general	Protein-Ligand	2.8	IC50=141nM	IC50	6.85	2003	squalene-hopene cyclase	R46	P33247	C23H28BrN2OS	460.45	459.111	56	58	54.8	6.76	5.37	1	1	11	C=CC[N@H+](CCCCCCOc1ccc(cc1)c1nsc2c1ccc(c2)Br)C	0	C489H171N111O136S3+4	train
1h3c	general	Protein-Ligand	2.9	IC50=306nM	IC50	6.51	2003	squalene-hopene cyclase	R79	P33247	C23H28BrN2OS	460.45	459.111	56	58	54.8	6.76	5.37	1	1	11	C=CC[N@H+](CCCCCCOc1ccc2c(c1)snc2c1ccc(cc1)Br)C	0	C494H152N112O133S2+5	test
1h46	refined	Protein-Ligand	1.52	Ki=270uM	Ki	3.57	2003	exoglucanase i	RNP	Q7LHI2	C16H19NO2	257.328	257.142	38	39	41.82	2.91	3.06	1	1	6	O[C@@H](COc1cccc2c1cccc2)/C=N\C(C)C	0	C338H124N88O94S5+6	train
1h4n	general	Protein-Ligand	2	Ki=12uM	Ki	4.92	1997	carbonic anhydrase ii	TRS	P00918	C4H12NO3	122.143	122.082	20	19	88.33	-2.88	-3.06	4	3	6	OCC(CO)(CO)[NH3+]	1	C275H84N69O60SZn+3	train
1h4w	refined	Protein-Ligand	1.7	Ki=22uM	Ki	4.66	2002	trypsin beta	BEN	P35030	C7H9N2	121.16	121.077	18	18	51.61	2.71	-0.15	0	0	1	NC(=[NH2+])c1ccccc1	0	C214H77N61O61S5+5	train
1h5u	general	Protein-Ligand	1.76	IC50=178nM	IC50	6.75	2001	glycogen phosphorylase	CHI	P00489	C23H23ClFN3O3	443.898	443.141	54	57	85.43	3.78	3.61	3	3	8	O[C@@H]1CCN(CC1)C(=O)[C@@H](NC(=O)c1cc2c([nH]1)ccc(c2)Cl)Cc1ccc(cc1)F	0	C374H118N107O88S2+15	train
1h5v	refined	Protein-Ligand	1.1	Ki=117uM	Ki	3.93	2002	endoglucanase 5a	5-mer	O85465	C31H54O22S4	907.007	906.199	111	115	480.26	-7.45	-8.4	16	16	30	OC[C@H]1O[C@@H](S[C@@H]2[C@@H](CO)O[C@H]([C@@H]([C@H]2O)O)S[C@@H]2[C@@H](CO)O[C@@H]([C@@H]([C@H]2O)O)OC)[C@@H]([C@H]([C@@H]1S[C@@H]1O[C@H](CO)[C@H]([C@@H]([C@H]1O)O)S[C@@H]1O[C@H](CO)[C@H]([C@@H]([C@H]1O)O)O)O)O	0	C288H103N80O97+4	valid
1h60	general	Protein-Ligand	1.6	Kd=20uM	Kd	4.7	2001	pentaerythritol tetranitrate reductase	STR	P71278	C21H30O2	314.462	314.225	53	56	34.14	4	4.72	0	2	1	O=C1CC[C@]2(C(=C1)CC[C@@H]1[C@@H]2CC[C@]2([C@H]1CC[C@@H]2C(=O)C)C)C	0	C303H109N80O86S2+5	train
1h61	general	Protein-Ligand	1.4	Kd=13uM	Kd	4.89	2001	pentaerythritol tetranitrate reductase	PDN	P71278	C21H26O5	358.428	358.178	52	55	91.67	1.34	1.76	2	5	4	O=C[C@@H]([C@@]1(O)CC[C@@H]2[C@]1(C)CC(=O)[C@H]1[C@H]2CCC2=CC(=O)C=C[C@]12C)O	0	C279H114N81O82+6	test
1h62	general	Protein-Ligand	1.9	Kd=17uM	Kd	4.77	2001	pentaerythritol tetranitrate reductase	ANB	P71278	C19H24O2	284.393	284.178	45	48	34.14	3.21	3.86	0	2	0	O=C1C=C[C@]2(C(=C1)CC[C@@H]1[C@@H]2CC[C@]2([C@H]1CCC2=O)C)C	0	C276H101N75O79S2+6	test
1h6h	refined	Protein-Ligand	1.7	Kd=5.0uM	Kd	5.3	2001	neutrophil cytosol factor 4	PIB	Q15080	C17H34O16P2	556.39	556.132	69	69	289.54	-4.1	-2.4	4	11	19	CCCC(=O)O[C@H](COP(O[C@H]1[C@H](O)[C@@H](O)[C@@H]([C@H]([C@H]1O)OP(O)(O)O)O)(O)O)COC(=O)CCC	0	C187H47N56O38S+10	train
1h8l	general	Protein-Ligand	2.6	Ki=34nM	Ki	7.47	2002	carboxypeptidase gp180 residues 503-882	GEM	P83852	C7H14N3O4S	236.269	236.071	29	28	165.91	2.89	-1.6	0	4	5	OC(=O)C[C@@H](C(=O)O)SCC[NH+]=C(N)N	1	C259H83N73O82S2Zn+3	valid
1h8s	general	Protein-Ligand	2.4	Kd=1.54uM	Kd	5.81	2001	mutant al2 6e7p9g	AIC		C16H20N3O4S	350.413	350.117	44	46	139.65	-0.9	-0.07	2	4	4	[NH3+][C@H](c1ccccc1)C(=O)N[C@@H]1C(=O)N2[C@@H]1SC([C@@H]2C(=O)O)(C)C	0	C305H77N64O69S+2	train
1h8y	general	Protein-Ligand	2	IC50=0.02uM	IC50	7.7	2001	beta-lactamase	MER	Q51400	C17H28N3O5S	386.486	386.175	54	55	149.18	-1.86	-0.37	2	5	8	O=C[C@@H]([C@@H]1N=C([C@@H]([C@@H]1C)S[C@@H]1C[NH2+][C@H](C1)C(=O)N(C)C)C(=O)O)[C@H](O)C	0	C250H83N62O64S+6	test
1h9l	general	Protein-Ligand	1.67	Ki=0.76mM	Ki	3.12	2001	elastase	5-mer	P00772	C21H37N4O6	441.542	441.271	68	68	160.52	-0.3	0.04	3	6	14	O=C[C@H]([C@H](CC)C)NC(=O)[C@@H]1CCCN1C(=O)[C@@H](NC(=O)[C@H](C(C)C)[NH3+])CCC(=O)O	0	C252H95N72O78S5+4	train
1h9z	general	Protein-Ligand	2.5	Kd=3.8uM	Kd	5.42	2001	serum albumin	RWF	P02768	C19H16O4	308.328	308.105	39	41	67.51	2.65	3.61	1	3	5	CC(=O)C[C@@H](c1c(=O)oc2c(c1O)cccc2)c1ccccc1	0	C278H104N76O75S5+10	test
1ha2	general	Protein-Ligand	2.5	Kd=2.9uM	Kd	5.54	2001	serum albumin	SWF	P02768	C19H16O4	308.328	308.105	39	41	67.51	2.65	3.61	1	3	5	CC(=O)C[C@H](c1c(=O)oc2c(c1O)cccc2)c1ccccc1	0	C283H106N77O78S5+10	test
1hbj	general	Protein-Ligand	2.5	IC50=3.0nM	IC50	8.52	2001	acetylcholinesterase	FBQ	P04058	C20H18F4N2OS	410.428	410.108	46	48	84.44	4.21	5.87	2	2	6	Cc1nc2cccc(c2c(c1CSCc1cccc(c1)[C@@H](C(F)(F)F)O)N)F	0	C336H97N73O88S+2	train
1hbv	refined	Protein-Ligand	2.3	Ki=430nM	Ki	6.37	1995	HIV-1 protease	GAN	P03366	C32H53N5O5	587.794	587.405	95	96	145.68	3.47	2.78	5	4	17	COC(=O)[C@H](C(C)C)NC(=O)[C@H](C(C)C)NC(=O)[C@@H]([N@@H+]1CCC(=C[C@H](C1)Cc1ccccc1)[C@@H](NC(=O)[C@@H]([NH3+])C)C)C	0	C320H105N86O91S2+5	train
1hdq	refined	Protein-Ligand	2.3	Ki=1.5uM	Ki	5.82	2001	carboxypeptidase a	INF	P00730	C10H12N2O4	224.213	224.08	28	28	98.66	1.35	1.15	3	4	6	ONC(=O)N[C@@H](C(=O)O)Cc1ccccc1	1	C277H90N68O77Zn+3	train
1hdt	general	Protein-Ligand	2.6	Ki=17.2nM	Ki	7.76	1995	thrombin alpha	0E7	P28509 P00734	C27H37N6O6	541.619	541.277	76	77	210.84	3.32	0.1	4	6	18	O=C(N[C@H](C(=O)N[C@H](C(=O)N[C@H](C(=O)O)Cc1ccccc1)[C@@H](O)C)Cc1ccccc1)CCC[NH+]=C(N)N	0	C345H108N92O99S5+8	train
1hee	refined	Protein-Ligand	1.75	Ki=4.6uM	Ki	5.34	2001	carboxypeptidase a	LHY	P00730	C10H12N2O4	224.213	224.08	28	28	98.66	1.35	1.15	3	4	6	ONC(=O)N[C@H](C(=O)O)Cc1ccccc1	1	C304H96N76O87Zn+3	train
1heg	general	Protein-Ligand	2.2	Ki=18nM	Ki	7.74	1994	HIV-1 protease	PSI	P03366	C29H48N5O7	578.721	578.355	89	89	190.57	1.79	1.01	6	6	22	COC(=O)[C@H](C(C)C)NC(=O)[C@H](C(C)C)NC(=O)CC[C@@H]([C@@H](NC(=O)[C@@H](NC(=O)[C@@H]([NH3+])C)C)Cc1ccccc1)O	0	C291H102N81O86S+5	valid
1hfs	refined	Protein-Ligand	1.7	Ki=2nM	Ki	8.7	1998	stromelysin-1	L04	P08254	C43H48FN3O5	705.857	705.358	100	104	115.81	9.06	8.53	2	5	19	Fc1ccc(cc1)c1ccc(cc1)CC[C@@H](C(=O)N[C@H](C(=O)Nc1ccccc1)CC(C)C)C[C@@H](C(=O)O)CCCCN1Cc2c(C1=O)cccc2	1	C438H137CaN112O119S2Zn2+9	train
1hge	general	Protein-Ligand	2.6	Kd=5.4mM	Kd	2.27	1994	hemagglutinin	MNA	P03438	C12H21NO9	323.296	323.122	43	43	165.78	-2.04	-2.83	5	7	10	OC[C@H]([C@H]([C@@H]1O[C@](OC)(C[C@@H]([C@H]1NC(=O)C)O)C(=O)O)O)O	0	C205H67N63O61S+6	train
1hgi	general	Protein-Ligand	2.7	Kd=2.1mM	Kd	2.68	1994	hemagglutinin	ANA	P03438	C14H23NO10	365.333	365.132	48	48	171.85	-1.47	-2.26	4	7	11	OC[C@H]([C@H]([C@@H]1O[C@](OC)(C[C@@H]([C@H]1NC(=O)C)OC(=O)C)C(=O)O)O)O	0	C234H76N70O67S+6	valid
1hgj	general	Protein-Ligand	2.7	Kd=22mM	Kd	1.66	1994	hemagglutinin	AMN	P03438	C12H23N2O8	323.32	323.145	45	45	173.19	-4.58	-3.58	5	6	9	[NH3+]C[C@H]([C@H]([C@@H]1O[C@](OC)(C[C@@H]([C@H]1NC(=O)C)O)C(=O)O)O)O	0	C225H67N65O65S+4	train
1hih	refined	Protein-Ligand	2.2	Ki=9nM	Ki	8.05	1995	HIV-1 protease	C20	P03366	C31H52N5O5	574.775	574.397	93	94	141.07	4.28	2.46	6	5	20	CC(=O)N[C@H](C(=O)N[N@H+](C[C@@H]([C@@H](NC(=O)[C@H](C(C)C)NC(=O)C)Cc1ccccc1)O)CC1CCCCC1)C(C)C	0	C356H111N94O100S2+6	test
1hii	refined	Protein-Ligand	2.3	Ki=53nM	Ki	7.28	1995	HIV-2 protease	C20	P04584	C31H52N5O5	574.775	574.397	93	94	141.07	4.28	2.46	6	5	20	CC(=O)N[C@H](C(=O)N[N@H+](C[C@@H]([C@@H](NC(=O)[C@H](C(C)C)NC(=O)C)Cc1ccccc1)O)CC1CCCCC1)C(C)C	0	C348H113N92O103S2+5	train
1him	general	Protein-Ligand	2.9	IC50=20nM	IC50	7.7	1994	antibody fab fragment	10-mer	I6SHA6	C42H58N9O15	928.961	928.405	124	126	400.93	-1.59	-1.52	11	15	32	OC[C@@H](C(=O)N)NC(=O)[C@@H](NC(=O)[C@@H](NC(=O)[C@@H](NC(=O)[C@@H]1CCCN1C(=O)[C@H](C(C)C)NC(=O)[C@@H](NC(=O)[C@H](Cc1ccc(cc1)O)[NH3+])CC(=O)O)CC(=O)O)Cc1ccc(cc1)O)C	0	C283H79N78O89S+8	train
1hiy	general	Protein-Ligand	2.6	Kd=0.83mM	Kd	3.08	2001	nucleoside diphosphate kinase	3AN	P22887	C10H19N6O9P2	429.24	429.069	46	48	273.51	-7.43	-2.79	3	9	6	O[C@@H]1[C@H]([NH3+])[C@H](O[C@H]1n1cnc2c1ncnc2N)COP(OP(O)(O)O)(O)O	0	C271H91N79O76+9	train
1hk1	general	Protein-Ligand	2.65	Kd=2.3uM	Kd	5.64	2003	serum albumin	T44	P02768	C15H12I4NO4	777.878	777.695	36	37	94.4	3.25	3.84	2	3	5	OC(=O)[C@H](Cc1cc(I)c(c(c1)I)Oc1cc(I)c(c(c1)I)O)[NH3+]	0	C315H112N86O78S2+12	train
1hk2	general	Protein-Ligand	2.8	Kd=0.17uM	Kd	6.77	2003	serum albumin	T44	P02768	C15H12I4NO4	777.878	777.695	36	37	94.4	3.25	3.84	2	3	5	OC(=O)[C@H](Cc1cc(I)c(c(c1)I)Oc1cc(I)c(c(c1)I)O)[NH3+]	0	C320H119N85O84S3+11	train
1hk3	general	Protein-Ligand	2.8	Kd=0.26uM	Kd	6.59	2003	serum albumin	T44	P02768	C15H12I4NO4	777.878	777.695	36	37	94.4	3.25	3.84	2	3	5	OC(=O)[C@H](Cc1cc(I)c(c(c1)I)Oc1cc(I)c(c(c1)I)O)[NH3+]	0	C337H119N88O86S5+11	train
1hk4	refined	Protein-Ligand	2.4	Kd=4.9uM	Kd	5.31	2003	serum albumin	T44	P02768	C15H12I4NO4	777.878	777.695	36	37	94.4	3.25	3.84	2	3	5	OC(=O)[C@H](Cc1cc(I)c(c(c1)I)Oc1cc(I)c(c(c1)I)O)[NH3+]	0	C224H72N67O71S2+8	test
1hk5	general	Protein-Ligand	2.7	Kd=5.72uM	Kd	5.24	2003	serum albumin	T44	P02768	C15H12I4NO4	777.878	777.695	36	37	94.4	3.25	3.84	2	3	5	OC(=O)[C@H](Cc1cc(I)c(c(c1)I)Oc1cc(I)c(c(c1)I)O)[NH3+]	0	C215H69N65O70S2+7	valid
1hkj	general	Protein-Ligand	2.6	IC50=2.6nM	IC50	8.59	2004	chitotriosidase	3-mer	Q13231	C26H45N4O14	637.654	637.293	89	92	252.17	-6.53	-4.96	8	8	18	COC[C@H]1O[C@@H](O[C@@H]2[C@@H](CO)O[C@H]([C@@H]([C@@H]2O)NC(=O)C)O[C@@H]2[C@@H](CO)[C@H]3[C@@H]([C@H]2O)[NH+]=C(O3)N(C)C)[C@@H]([C@@H]([C@@H]1O)O)NC(=O)C	0	C418H114N93O111S5+3	train
1hkk	general	Protein-Ligand	1.85	IC50=40nM	IC50	7.4	2004	chitotriosidase	3-mer	Q13231	C25H43N4O14	623.627	623.278	86	89	263.17	-6.52	-5.62	9	9	18	OC[C@H]1O[C@@H](O[C@@H]2[C@@H](CO)[C@H]3[C@@H]([C@H]2O)[NH+]=C(O3)N(C)C)[C@@H]([C@@H]([C@@H]1O[C@@H]1O[C@H](CO)[C@H]([C@H]([C@H]1NC(=O)C)O)O)O)NC(=O)C	0	C415H112N93O111S5+3	train
1hkm	general	Protein-Ligand	2.55	IC50=1.9nM	IC50	8.72	2004	chitotriosidase	3-mer	Q13231	C24H38N4O14	606.577	606.238	80	83	270.68	-4.14	-5.69	9	9	19	OC[C@H]1O[C@@H](O[C@@H]2[C@@H](CO)[C@H]3[C@@H]([C@H]2O)N=C(O3)N=C)[C@@H]([C@@H]([C@@H]1O[C@@H]1O[C@H](CO)[C@H]([C@H]([C@H]1NC(=O)C)O)O)O)NC(=O)C	0	C375H112N89O105S5+4	valid
1hlf	general	Protein-Ligand	2.26	Ki=2.3uM	Ki	5.64	2000	glycogen phosphorylase	GL4	P00489	C8H12N2O6S	264.256	264.042	29	30	163.37	-2.78	-3.18	6	5	5	OC[C@H]1O[C@@]2(NC(=S)NC2=O)[C@@H]([C@H]([C@@H]1O)O)O	0	C268H103N85O84S2+8	valid
1hlk	refined	Protein-Ligand	2.5	Ki=10uM	Ki	5	2001	beta-lactamase ii	113	P25910	C15H14O8	322.267	322.069	37	39	126.43	2.12	1.51	2	5	3	CO[C@@H]1O[C@@H](C)Cc2c1c(=O)c1c(o2)cc(c(c1C(=O)O)O)O	1	C220H77N63O66S4Zn2+4	valid
1hmr	refined	Protein-Ligand	1.4	Kd=0.28uM	Kd	6.55	1995	fatty acid-binding protein	ELA	P05413	C18H36O2	284.477	284.272	56	55	37.3	9.64	6.33	0	2	15	CCCCCCCCCCCCCCCCCC(=O)O	0	C337H125N91O97S3+11	train
1hms	refined	Protein-Ligand	1.4	Kd=0.43uM	Kd	6.37	1995	fatty acid-binding protein	OLA	P05413	C18H34O2	282.461	282.256	54	53	37.3	8.71	6.11	0	2	14	CCCCCCCC/C=C\CCCCCCCC(=O)O	0	C324H123N89O96S3+11	test
1hmt	refined	Protein-Ligand	1.4	Kd=1.64uM	Kd	5.79	1995	fatty acid-binding protein	STE	P05413	C18H36O2	284.477	284.272	56	55	37.3	9.64	6.33	0	2	15	CCCCCCCCCCCCCCCCCC(=O)O	0	C348H134N94O103S3+11	train
1hn2	general	Protein-Ligand	1.8	Kd=1.0uM	Kd	6	2001	odorant-binding protein	ANC	P07435	C14H11N	193.244	193.089	26	28	26.02	3.74	4.16	1	0	0	Nc1cccc2c1cc1ccccc1c2	0	C314H97N69O75+6	train
1hnn	general	Protein-Ligand	2.4	Ki=0.58uM	Ki	6.24	2001	phenylethanolamine n-methyltransferase	SKF	P11086	C9H13N2O2S	213.277	213.07	27	28	85.15	-0.11	2.3	2	2	1	NS(=O)(=O)c1ccc2c(c1)C[NH2+]CC2	0	C330H100N76O86S2+4	train
1hos	refined	Protein-Ligand	2.3	Ki=2.8nM	Ki	8.55	1993	HIV-1 protease	PHP	P03366	C42H52N4O8P	771.858	771.352	107	110	188.91	6.89	7.65	4	6	24	CC([C@@H](C(=O)N[C@H](P([C@H](Cc1ccccc1)NC(=O)[C@H](C(C)C)NC(=O)OCc1ccccc1)(O)O)Cc1ccccc1)NC(=O)OCc1ccccc1)C	0	C323H112N86O92S2+6	test
1hp0	general	Protein-Ligand	2.1	Ki=0.2uM	Ki	6.7	2001	purine nucleoside hydrolase	AD3	Q9GPQ4	C11H14N4O4	266.253	266.102	33	35	126.65	-1.59	-0.79	4	5	5	OC[C@H]1O[C@H]([C@@H]([C@@H]1O)O)n1cnc2c1ccnc2N	1	C282H90CaN69O79S4+3	train
1hp5	refined	Protein-Ligand	2.1	Ki=280nM	Ki	6.55	2001	beta-n-acetylhexosaminidase	NGT	O85361	C8H13NO4S	219.258	219.057	27	28	107.58	-1.14	-1.61	3	3	4	OC[C@H]1O[C@@H]2SC(=N[C@@H]2[C@H]([C@@H]1O)O)C	0	C273H108N78O86S3+6	test
1hpo	refined	Protein-Ligand	2.5	Ki=0.6nM	Ki	9.22	1997	HIV-1 protease	UNI	P03367	C28H28N2O5S	504.597	504.172	64	68	128.78	5.06	6.37	2	5	7	N#Cc1ccc(cc1)S(=O)(=O)Nc1cccc(c1)[C@@H](c1c(=O)oc2c(c1O)CCCCCC2)C1CC1	0	C320H105N86O92S2+6	test
1hps	refined	Protein-Ligand	2.3	Ki=0.6nM	Ki	9.22	1994	HIV-1 protease	RUN	P03366	C38H46N4O5	638.796	638.347	93	96	133.41	6.85	6.79	4	5	20	O=C(N[C@H](C(=O)N[C@H]([C@H](C[C@H](c1ncc([nH]1)C(=O)C(C)C)Cc1ccccc1)O)Cc1ccccc1)C(C)C)OCc1ccccc1	0	C342H111N90O98S2+6	train
1hpv	refined	Protein-Ligand	1.9	Ki=0.60nM	Ki	9.22	1995	HIV-1 protease	478	P04587	C25H35N3O6S	505.627	505.225	70	72	139.57	2.89	4.46	3	4	14	CC(CN(S(=O)(=O)c1ccc(cc1)N)C[C@H]([C@H](Cc1ccccc1)NC(=O)O[C@H]1CCOC1)O)C	0	C344H112N92O99S2+6	valid
1hpx	refined	Protein-Ligand	2	Ki=5.5pM	Ki	11.26	1996	HIV-1 protease	KNI	P03367	C33H41N5O6S2	667.839	667.25	87	90	200.56	3.23	3.48	4	6	19	CSC[C@@H](C(=O)N[C@H]([C@@H](C(=O)N1CSC[C@H]1C(=O)NC(C)(C)C)O)Cc1ccccc1)NC(=O)COc1cccc2c1ccnc2	0	C323H106N86O93S+5	valid
1hq5	general	Protein-Ligand	2.3	Kd=2.22uM	Kd	5.65	2001	arginase 1	S2C	P07824	C5H14BNO5S	211.044	211.069	27	26	150.93	-3.01	-2.67	4	5	8	OC(=O)[C@H](CSCC[B](O)(O)O)[NH3+]	1	C238H83Mn2N72O84S2+3	train
1hqf	general	Protein-Ligand	2.9	Ki=10uM	Ki	5	2001	arginase 1	HAR	P07824	C6H16N4O3	192.216	192.122	29	28	137.19	-1.95	-3.07	2	3	5	ON/C(=[NH+]\CCC[C@@H](C(=O)O)[NH3+])/N	1	C256H92Mn2N76O89S+4	valid
1hqg	general	Protein-Ligand	2	Ki=1.0mM	Ki	3	2001	arginase 1	ORN	P07824	C5H14N2O2	134.177	134.106	23	22	92.58	-2.71	-2.3	2	2	3	OC(=O)[C@@H]([NH3+])CCC[NH3+]	1	C169H73Mn2N49O62+3	test
1hqh	general	Protein-Ligand	2.8	Ki=0.5uM	Ki	6.3	2001	arginase 1	NNH	P07824	C5H12N4O3	176.174	176.091	24	23	134.36	-2.58	-3.07	1	4	3	O=N/C(=[NH+]\CC[C@@H](C(=O)O)[NH3+])/N	1	C231H82Mn2N70O82S2+3	train
1hrn	general	Protein-Ligand	1.8	IC50=9nM	IC50	8.05	1995	renin	03D	P00797	C30H49NO5	503.714	503.361	85	87	110.02	5.67	4.37	5	5	20	CC(C[C@@H]([C@@H]([C@@H](NC(=O)[C@@H](C[C@@H]([C@H](Cc1ccccc1)O)O)CC1CC1)CC1CCCCC1)O)O)C	0	C404H120N96O116S5+4	train
1hs6	general	Protein-Ligand	1.95	IC50=4.2uM	IC50	5.38	2001	human Leukotriene A-4 hydrolase (LTA4H)	BES	P09960	C16H25N2O4	309.381	309.181	47	47	114.27	-0.08	0.21	3	4	9	O[C@@H]([C@@H](Cc1ccccc1)[NH3+])C(=O)N[C@H](C(=O)O)CC(C)C	1	C375H139N96O112S4Zn+6	test
1hsg	general	Protein-Ligand	2	Ki=0.38nM	Ki	9.42	1996	hiv-1 protease	MK1	P03367	C36H49N5O4	615.805	615.378	94	98	120.43	2.79	3.95	6	5	16	O[C@H](C[N@@H+]1CC[N@H+](C[C@H]1C(=O)NC(C)(C)C)Cc1cccnc1)C[C@H](C(=O)N[C@@H]1[C@H](O)Cc2c1cccc2)Cc1ccccc1	0	C341H111N90O98S2+6	valid
1hsh	refined	Protein-Ligand	1.9	Ki=0.38nM	Ki	9.42	1996	HIV-2 protease	MK1	P04584	C36H49N5O4	615.805	615.378	94	98	120.43	2.79	3.95	6	5	16	O[C@H](C[N@@H+]1CC[N@H+](C[C@H]1C(=O)NC(C)(C)C)Cc1cccnc1)C[C@H](C(=O)N[C@@H]1[C@H](O)Cc2c1cccc2)Cc1ccccc1	0	C345H113N92O100S2+6	train
1hsl	refined	Protein-Ligand	1.89	Kd=0.064uM	Kd	7.19	1994	histidine-binding protein	HIS	P0AEU0	C6H10N3O2	156.162	156.077	21	21	93.62	-2.35	-1.35	2	3	2	OC(=O)[C@@H]([NH3+])Cc1c[nH]cn1	0	C298H104N73O97S+3	train
1hte	general	Protein-Ligand	2.8	IC50=2265nM	IC50	5.64	1994	hiv-1 protease	G23	P03366	C23H28N3O4S	442.551	442.18	59	61	137.41	1.02	3.25	3	4	9	O=C(N[C@@H]([C@@H]1[NH2+][C@H](C(S1)(C)C)C(=O)O)C(=O)NCc1ccccc1)Cc1ccccc1	0	C313H103N84O90S+5	test
1htf	general	Protein-Ligand	2.2	IC50=148nM	IC50	6.83	1994	hiv-1 protease	G26	P03366	C32H39N4O4S	575.741	575.269	80	83	149.44	3.5	4.28	5	4	16	OC[C@H](NC(=O)[C@@H]1[NH2+][C@H](SC1(C)C)[C@@H](C(=O)NCc1ccccc1)NC(=O)Cc1ccccc1)Cc1ccccc1	0	C326H110N86O94S+5	train
1htg	general	Protein-Ligand	2	IC50=3.8nM	IC50	8.42	1994	hiv-1 protease	G37	P03366	C42H48N7O5S	762.939	762.344	103	108	207.22	3.91	5.62	7	6	21	O=C(C[C@H]([C@H](NC(=O)[C@@H]1[NH2+][C@H](SC1(C)C)[C@@H](C(=O)NCc1ccccc1)NC(=O)Cc1ccccc1)Cc1ccccc1)O)NCc1nc2c([nH]1)cccc2	0	C365H114N96O103S2+6	valid
1hti	general	Protein-Ligand	2.8	Ki=7.4uM	Ki	5.13	1995	triosephosphate isomerase	PGA	P60174	C2H6O6P	157.039	156.99	15	14	120.81	-1.24	-1.26	0	5	1	OC(=O)COP(O)(O)O	0	C211H76N54O61S+3	train
1hty	general	Protein-Ligand	1.4	IC50=40mM	IC50	1.4	2002	ALPHA-MANNOSIDASE II	TRS	Q24451	C6H14O2	118.174	118.099	22	21	40.46	0.27	0.53	2	2	4	C[C@H](CC(O)(C)C)O	0	C171H58N45O49S+4	train
1hv5	general	Protein-Ligand	2.6	Ki=5nM	Ki	8.3	2001	stromelysin 3	RXP	Q02853	C39H44N4O6P	695.764	695.3	94	98	180.36	5.34	7.13	4	5	20	O=C(N[C@@H](P(C[C@H](C(=O)N[C@H](C(=O)N)Cc1c[nH]c2c1cccc2)CCCc1ccccc1)(O)O)Cc1ccccc1)OCc1ccccc1	1	C352H105CaN86O92SZn2+7	train
1hvj	refined	Protein-Ligand	2	Ki=4pM	Ki	11.4	1994	HIV-1 protease	A78	P04587	C44H58N8O5	778.982	778.453	115	118	168.89	5	6.28	5	7	26	O[C@H]([C@@H](NC(=O)[C@H](C(C)C)NC(=O)N(Cc1ccccn1)C)Cc1ccccc1)C[C@@H](NC(=O)[C@H](C(C)C)NC(=O)N(Cc1ccccn1)C)Cc1ccccc1	0	C281H103N74O88S+3	valid
1hvl	refined	Protein-Ligand	1.8	Ki=112pM	Ki	9.95	1994	HIV-1 protease	A76	P03367	C44H58N8O6	794.981	794.448	116	119	189.12	4.03	5.25	6	8	27	O[C@@H]([C@@H]([C@H](Cc1ccccc1)NC(=O)[C@H](C(C)C)NC(=O)N(Cc1ccccn1)C)O)[C@H](Cc1ccccc1)NC(=O)[C@H](C(C)C)NC(=O)N(Cc1ccccn1)C	0	C330H105N88O95S+5	valid
1hvr	refined	Protein-Ligand	1.8	Ki=0.31nM	Ki	9.51	1995	HIV-1 protease	XK2	P04585	C41H38N2O3	606.752	606.288	84	90	64.01	7.81	7.25	2	3	10	O[C@@H]1[C@@H](O)[C@@H](Cc2ccccc2)N(C(=O)N([C@@H]1Cc1ccccc1)Cc1ccc2c(c1)cccc2)Cc1ccc2c(c1)cccc2	0	C360H115N95O101S2+6	valid
1hvy	general	Protein-Ligand	1.9	IC50=0.29uM	IC50	6.54	2001	Human thymidylate synthase	D16	P04818	C21H22N4O6S	458.488	458.126	54	56	180.93	3.74	2.37	2	6	8	OC(=O)CC[C@@H](C(=O)O)NC(=O)c1ccc(s1)N(Cc1ccc2c(c1)c(=O)[nH]c(n2)C)C	0	C426H139N118O107S4+12	train
1hwr	refined	Protein-Ligand	1.8	Ki=4.70nM	Ki	8.33	1999	HIV-1 protease	216	P04585	C25H30N2O3	406.517	406.226	60	62	64.01	3.6	2.92	2	3	10	C=CCN1[C@H](Cc2ccccc2)[C@H](O)[C@H]([C@H](N(C1=O)CC=C)Cc1ccccc1)O	0	C297H100N78O84+4	test
1hww	general	Protein-Ligand	1.87	IC50=20nM	IC50	7.7	2002	alpha-mannosidase ii	SWA	Q24451	C8H16NO3	174.218	174.113	28	29	65.13	-1.26	-1.3	4	3	3	O[C@@H]1C[N@@H+]2[C@@H]([C@@H]1O)[C@H](O)CCC2	1	C261H92N65O80SZn+5	train
1hxb	refined	Protein-Ligand	2.3	Ki=0.12nM	Ki	9.92	1997	HIV-1 protease	ROC	P04585	C38H51N6O5	671.849	671.392	100	104	167.95	4.24	5.12	6	6	17	NC(=O)C[C@@H](C(=O)N[C@H]([C@@H](C[N@@H+]1C[C@H]2CCCC[C@H]2C[C@H]1C(=O)NC(C)(C)C)O)Cc1ccccc1)NC(=O)c1ccc2c(n1)cccc2	0	C340H106N91O95S2+6	train
1hxk	general	Protein-Ligand	1.5	IC50=400uM	IC50	3.4	2002	alpha-mannosidase ii	DMJ	Q24451	C6H14NO4	164.18	164.092	25	25	97.53	-2.35	-2.42	5	4	5	OC[C@H]1[NH2+]C[C@H]([C@H]([C@@H]1O)O)O	1	C244H88N61O75SZn+5	train
1hxw	refined	Protein-Ligand	1.8	Ki=15pM	Ki	10.82	1998	HIV-1 protease	RIT	P12499	C37H48N6O5S2	720.944	720.313	98	101	202.26	6.05	7.08	4	6	23	O=C(N[C@H]([C@H](C[C@H](Cc1ccccc1)NC(=O)[C@H](C(C)C)NC(=O)N(Cc1csc(n1)C(C)C)C)O)Cc1ccccc1)OCc1cncs1	0	C333H108N88O99S+5	valid
1hy7	general	Protein-Ligand	1.5	IC50=4.09uM	IC50	5.39	2002	stromelysin-1	MBS	P08254	C20H21NO6S	403.449	403.109	49	50	110.31	3.37	3.61	1	4	8	COCC#CC[C@H](C(=O)O)NS(=O)(=O)c1ccc(cc1)c1ccc(cc1)OC	1	C352H111CaN86O91SZn2+8	train
1hyo	refined	Protein-Ligand	1.3	Ki=84.8uM	Ki	4.07	2001	fumarylacetoacetate hydrolase	HBU	P35505	C5H10O5P	181.104	181.027	21	20	108.42	-0.86	-0.51	0	5	3	O=C(CP(O)(O)C)CC(=O)O	1	C282H98CaMgN71O85S5+4	valid
1i00	general	Protein-Ligand	2.5	Ki=0.46uM	Ki	6.34	2001	thymidylate synthase	D16	P04818	C21H22N4O6S	458.488	458.126	54	56	180.93	3.74	2.37	2	6	8	OC(=O)CC[C@@H](C(=O)O)NC(=O)c1ccc(s1)N(Cc1ccc2c(c1)c(=O)[nH]c(n2)C)C	0	C343H109N98O85S2+11	train
1i1e	refined	Protein-Ligand	2.5	Kd=9.4uM	Kd	5.03	2001	botulinum neurotoxin type b	DM2	P10844	C27H32NO11	546.543	546.198	71	75	214.01	2.06	0.23	8	8	12	OCC(=O)[C@@]1(O)C[C@H](O[C@@H]2O[C@@H](C)[C@H]([C@H](C2)[NH3+])O)c2c(C1)c(O)c1c(c2O)c(O)c2c(c1O)cccc2OC	0	C238H66N63O61S2+8	train
1i32	general	Protein-Ligand	2.6	IC50=2uM	IC50	5.7	2001	glyceraldehyde 3-phosphate dehydrogenase	NMD	Q27890	C30H30N6O6	570.596	570.223	72	77	152.88	3.1	3.12	4	6	12	OC[C@H]1O[C@H]([C@@H]([C@@H]1O)NC(=O)c1cc(OC)cc(c1)OC)n1cnc2c1ncnc2NCc1cccc2c1cccc2	0	C246H80N70O70S3+6	train
1i33	general	Protein-Ligand	3	IC50=75uM	IC50	4.12	2001	glyceraldehyde 3-phosphate dehydrogenase	TND	Q27890	C29H32N6O6	560.601	560.238	73	78	152.88	2.64	2.85	4	6	11	OC[C@H]1O[C@H]([C@@H]([C@@H]1O)NC(=O)c1cc(OC)cc(c1)OC)n1cnc2c1ncnc2N[C@@H]1CCCc2c1cccc2	0	C274H84N76O75S3+7	test
1i37	refined	Protein-Ligand	2	Ki=0.27nM	Ki	9.57	2001	ligand-binding domains of rat androgen receptor	DHT	P15207	C19H28O2	288.424	288.209	49	52	37.3	3.33	3.88	1	2	1	O=C1CC[C@]2(C(=C1)CC[C@@H]1[C@@H]2CC[C@]2([C@H]1CC[C@@H]2O)C)C	0	C342H111N81O87S8+4	valid
1i5r	refined	Protein-Ligand	1.6	Ki=3.0nM	Ki	8.52	2003	beta-hydroxysteroid dehydrogenase	HYC	P14061	C37H51N5O7	677.83	677.379	100	106	186.07	5.05	5.12	5	8	17	O=C(OC[C@H]1O[C@H]([C@@H]([C@@H]1O)O)n1cnc2c1ncnc2N)CCCCCCCC[C@H]1C[C@@H]2[C@]([C@H]1O)(C)CC[C@H]1[C@H]2CCc2c1ccc(c2)O	0	C409H126N108O108S5+7	test
1i72	general	Protein-Ligand	2	IC50=55nM	IC50	7.26	2001	S-Adenosylmethionine decarboxylase (AdoMetDC)	MAO	P17707	C13H23N7O4	341.366	341.181	47	49	160.62	-2.08	-3.7	5	5	8	[NH3+]OCC[N@@H+](C[C@H]1O[C@H]([C@@H]([C@@H]1O)O)n1cnc2c1ncnc2N)C	0	C278H92N60O78S8+4	train
1i7c	general	Protein-Ligand	2.4	IC50=0.4uM	IC50	6.4	2001	s-adenosylmethionine decarboxylase beta chain	MGB	P17707	C5H17N8	189.242	189.158	30	29	158.62	2.4	-4.65	1	0	4	NC(=[NH2+])N/N=C/[C@@H]([NH2+][NH+]=C(N)N)C	0	C215H69N46O63S5+2	test
1i7g	general	Protein-Ligand	2.2	IC50=1.0uM	IC50	6	2002	peroxisome proliferator activated receptor alph	AZ2	Q07869	C20H24O7S	408.465	408.124	52	53	107.51	4.38	3.76	0	4	10	CCO[C@H](C(=O)O)Cc1ccc(cc1)OCCc1ccc(cc1)OS(=O)(=O)C	0	C405H137N93O99S8+6	train
1i7i	general	Protein-Ligand	2.35	IC50=0.2uM	IC50	6.7	2002	peroxisome proliferator activated receptor gamm	AZ2	P37231	C20H24O7S	408.465	408.124	52	53	107.51	4.38	3.76	0	4	10	CCO[C@H](C(=O)O)Cc1ccc(cc1)OCCc1ccc(cc1)OS(=O)(=O)C	0	C377H126N88O84S5+6	train
1i7z	refined	Protein-Ligand	2.3	Kd=0.4uM	Kd	6.4	2001	chimera of ig kappa chain	COC	P01834 P01857	C17H22NO4	304.361	304.155	44	46	57.04	2.49	2.02	1	2	5	COC(=O)[C@H]1[C@H](C[C@H]2[N@@H+]([C@@H]1CC2)C)OC(=O)c1ccccc1	0	C287H78N62O75S2+2	valid
1i80	general	Protein-Ligand	2	Kd=0.39uM	Kd	6.41	2001	purine nucleoside phosphorylase	9HX	P9WP01	C6H5N3O	135.123	135.043	15	16	61.54	-0.17	0.25	2	1	0	O=c1[nH]cnc2c1[nH]cc2	0	C229H74N57O63S+2	train
1i8i	general	Protein-Ligand	2.4	Kd=22nM	Kd	7.66	2002	EGFRVIII PEPTIDE ANTIGEN	12-mer	P01660 P18529	C45H71N13O15	1034.12	1033.52	144	145	474.91	-5.69	-2.61	14	16	40	[NH3+]CCCC[C@@H](C(=O)NCC(=O)N[C@H](C(=O)N[C@H](C(=O)N[C@H](C(=O)N[C@H](C(=O)N[C@H](C(=O)N[C@H](C(=O)N[C@H](C(=O)O)Cc1[nH]cnc1)CC(=O)O)[C@H](O)C)C(C)C)C(C)C)Cc1ccc(cc1)O)CC(=O)N)[NH3+]	0	C248H81N60O90S2+2	test
1i8j	general	Protein-Ligand	1.9	IC50=39uM	IC50	4.41	2001	porphobilinogen synthase	DSB	P0ACB2	C10H18O4	202.248	202.121	32	31	74.6	4.99	2.28	0	4	7	OC(=O)CCCCCCCCC(=O)O	1	C319H99N75O91S6Zn+4	train
1i8z	general	Protein-Ligand	1.93	IC50=1.27nM	IC50	8.9	2001	carbonic anhydrase ii	INL	P00918	C18H24N3O6S3	474.595	474.083	54	57	165.44	1.28	3.94	2	4	5	COc1cccc(c1)N1[C@H](C[NH+]2CCOCC2)Cc2c(S1(=O)=O)sc(c2)S(=O)(=O)N	1	C348H108N92O80SZn+7	train
1i90	general	Protein-Ligand	2	IC50=1.28nM	IC50	8.89	2001	carbonic anhydrase ii	INM	P00918	C10H18N3O5S3	356.462	356.041	39	40	179.41	-1.14	1.52	2	4	5	COCCCN1C[C@H]([NH3+])c2c(S1(=O)=O)sc(c2)S(=O)(=O)N	1	C330H95N84O71Zn+6	train
1i91	general	Protein-Ligand	2	IC50=1.15nM	IC50	8.94	2001	carbonic anhydrase ii	INQ	P00918	C17H22N3O6S3	460.568	460.067	51	54	176.44	0.95	3.63	3	5	5	Oc1cccc(c1)N1[C@H](C[NH+]2CCOCC2)Cc2c(S1(=O)=O)sc(c2)S(=O)(=O)N	1	C306H94N75O64SZn+4	valid
1i9l	general	Protein-Ligand	1.93	Kd=3.3nM	Kd	8.48	2001	carbonic anhydrase ii	INV	P00918	C14H13FN2O3S	308.328	308.063	34	35	97.64	1.36	3.58	2	3	5	Fc1ccc(cc1)CNC(=O)c1ccc(cc1)S(=O)(=O)N	1	C334H103N84O77SZn+6	test
1i9m	general	Protein-Ligand	1.84	Kd=3.3nM	Kd	8.48	2001	carbonic anhydrase ii	INW	P00918	C14H12F2N2O3S	326.318	326.054	34	35	97.64	1.46	3.71	2	3	5	Fc1ccc(c(c1)F)CNC(=O)c1ccc(cc1)S(=O)(=O)N	1	C329H104N87O76SZn+6	test
1i9n	refined	Protein-Ligand	1.86	Kd=2.2nM	Kd	8.66	2001	carbonic anhydrase ii f131v	IOA	P00918	C14H12F2N2O3S	326.318	326.054	34	35	97.64	1.46	3.71	2	3	5	Fc1ccc(c(c1)CNC(=O)c1ccc(cc1)S(=O)(=O)N)F	1	C326H101N85O76SZn+5	valid
1i9o	general	Protein-Ligand	1.86	Kd=3.8nM	Kd	8.42	2001	carbonic anhydrase ii	IOC	P00918	C14H11F3N2O3S	344.309	344.044	34	35	97.64	1.56	3.85	2	3	5	O=C(c1ccc(cc1)S(=O)(=O)N)NCc1ccc(c(c1F)F)F	1	C306H92N82O68S2Zn+7	train
1i9p	refined	Protein-Ligand	1.92	Kd=3.9nM	Kd	8.41	2001	carbonic anhydrase ii f131v	IOE	P00918	C14H11F3N2O3S	344.309	344.044	34	35	97.64	1.56	3.85	2	3	5	O=C(c1ccc(cc1)S(=O)(=O)N)NCc1c(F)cc(cc1F)F	1	C214H70N57O50SZn+6	train
1i9q	general	Protein-Ligand	1.8	Kd=3.9nM	Kd	8.41	2001	carbonic anhydrase ii	IOF	P00918	C14H11F3N2O3S	344.309	344.044	34	35	97.64	1.56	3.85	2	3	5	O=C(c1ccc(cc1)S(=O)(=O)N)NCc1cc(F)c(c(c1)F)F	1	C312H100N80O67S2Zn+6	test
1iau	general	Protein-Ligand	2	Ki=80nM	Ki	7.1	2001	granzyme b	5-mer	P10144	C22H36N4O9	500.543	500.248	71	71	202.44	1.66	-0.06	4	9	17	OC[C@@H](NC(=O)[C@@H]1CCCN1C(=O)[C@@H](NC(=O)[C@H]([C@H](CC)C)NC(=O)C)CCC(=O)O)CC(=O)O	0	C268H88N81O81S6+10	test
1ibc	general	Protein-Ligand	2.73	Ki=56pM	Ki	10.25	1998	interleukin-1 beta convertase	4-mer	P29466	C28H35N7O9	613.619	613.25	79	81	255.7	1.51	0.53	7	10	20	OC[C@@H](NC(=O)[C@@H](NC(=O)[C@@H](NC(=O)[C@H](Cc1c[nH]c2c1cccc2)NC(=O)C)CCC(=O)O)Cc1[nH]cnc1)CC(=O)O	0	C260H86N86O83S4+6	train
1ibg	general	Protein-Ligand	2.7	Ki=2.8nM	Ki	8.55	1995	antibody fab fragment	OBN		C29H44O12	584.652	584.283	85	90	206.6	-1.98	-1.52	8	9	12	OC[C@@]12[C@H](O)C[C@@H](C[C@@]2(O)CC[C@@H]2[C@@H]1[C@H](O)C[C@]1([C@]2(O)CC[C@@H]1C1=CC(=O)OC1)C)O[C@@H]1O[C@@H](C)[C@@H]([C@H]([C@H]1O)O)O	0	C267H76N68O68+6	test
1icj	general	Protein-Ligand	1.9	Ki=6mM	Ki	2.22	1999	peptide deformylase	PGO	P0A6K3	C18H38O10	414.488	414.246	66	65	114.3	-2.32	-0.9	2	2	27	OCCOCCOCCOCCOCCOCCOCCOCCOCCO	1	C254H92N68NiO71S4+6	train
1idb	general	Protein-Ligand	2.2	IC50=11nM	IC50	7.96	1995	hiv-2 protease	0DO	P04584	C35H47N4O6S	651.836	651.322	93	96	147.51	4.19	5.4	4	6	16	O=C(N[C@H]([C@@H](C[N@@H+]1CC[C@H](C[C@H]1C(=O)NC(C)(C)C)S(=O)(=O)c1ccncc1)O)Cc1ccccc1)COc1c(C)cccc1C	0	C341H118N90O104S2+5	train
1ie9	refined	Protein-Ligand	1.4	Kd=0.065nM	Kd	10.19	2001	Vitamin D3 receptor	VDX	P11473	C27H44O3	416.636	416.329	74	76	60.69	5.07	5.7	3	3	9	O[C@H]1C[C@H](O)C(=C)/C(=C\C=C\2/CCC[C@]3([C@H]2CC[C@@H]3[C@H](CCCC(O)(C)C)C)C)/C1	0	C470H151N119O126S5+11	train
1iem	general	Protein-Ligand	2.3	Ki=20nM	Ki	7.7	2001	beta-lactamase	CB4	P00811	C10H15BN4O6S	330.125	330.081	37	37	195.6	0.69	-0.17	4	6	9	OB(CNC(=O)/C(=N\OC(C(=O)O)(C)C)/c1csc(n1)N)O	0	C241H78N68O77+5	train
1iep	general	Protein-Ligand	2.1	IC50=100nM	IC50	7	2001	proto-oncogene tyrosine-protein kinase abl	STI	P00520	C29H33N7O	495.619	495.275	70	74	88.68	3.52	5.04	4	4	8	C[N@@H+]1CC[N@H+](CC1)Cc1ccc(cc1)C(=O)Nc1ccc(c(c1)Nc1nccc(n1)c1cccnc1)C	0	C406H123N100O114S5+8	valid
1iew	general	Protein-Ligand	2.55	Ki=25.50uM	Ki	4.59	2001	beta-d-glucan glucohydrolase isoenzyme exo1	G2F	Q9XEI3	C6H11FO4	166.148	166.064	22	22	69.92	-1.04	-1.56	3	3	4	OC[C@H]1OC[C@@H]([C@H]([C@@H]1O)O)F	0	C236H100N67O73S4+5	train
1if7	refined	Protein-Ligand	1.98	Kd=30pM	Kd	10.52	2001	carbonic anhydrase ii	SBR	P00918	C19H21N3O3S	371.453	371.13	47	49	102.57	2.27	4.53	2	3	7	C[C@@H](Cn1ccc2c1cccc2)CNC(=O)c1ccc(cc1)S(=O)(=O)N	1	C356H108N87O83Zn+6	train
1if8	refined	Protein-Ligand	1.94	Kd=230pM	Kd	9.64	2001	carbonic anhydrase ii	SBS	P00918	C19H21N3O3S	371.453	371.13	47	49	102.57	2.27	4.53	2	3	7	C[C@H](Cn1ccc2c1cccc2)CNC(=O)c1ccc(cc1)S(=O)(=O)N	1	C344H109N86O82SZn+6	test
1igb	refined	Protein-Ligand	2.3	Ki=0.4uM	Ki	6.4	1996	beta-d-glucan glucohydrolase isoenzyme exo1	IPO	Q01693	C9H12IN2O2	307.108	306.994	26	26	76.97	0.78	0.34	3	2	5	ONC(=O)[C@@H](Cc1ccc(cc1)I)[NH3+]	1	C231H88N57O84S4Zn2+4	valid
1igj	refined	Protein-Ligand	2.5	Kd=0.1nM	Kd	10	1993	antibody fab	DGX		C29H44O8	520.655	520.304	81	86	125.68	1.88	2.46	4	5	7	O=C1OCC(=C1)[C@H]1CC[C@]2([C@]1(C)[C@H](O)C[C@H]1[C@H]2CC[C@H]2[C@]1(C)CC[C@@H](C2)O[C@H]1C[C@H](O)[C@@H]([C@H](O1)C)O)O	0	C270H81N63O76S2+	test
1ih0	general	Protein-Ligand	NMR	Kd=10uM	Kd	5	2001	troponin c, slow skeletal and cardiac muscles	EMD	P63316	C22H26N3O4S	428.525	428.164	56	59	109.78	3.34	4.62	2	2	5	COc1cc(ccc1OC)C(=O)N1CCCc2c1ccc(c2)[C@H]1[NH2+]NC(=O)S[C@@H]1C	1	C250H87Ca2N56O82S4+5	train
1ihy	general	Protein-Ligand	3	Ki=0.18mM	Ki	3.74	2002	glyceraldehyde 3-phosphate dehydrogenase	APR	P56649	C15H25N5O14P2	561.332	561.087	61	64	325.02	-6.34	-3.58	6	12	14	O[C@@H]1[C@@H](COP(OP(OC[C@H]2O[C@H]([C@@H]([C@@H]2O)O)O)(O)O)(O)O)O[C@H]([C@@H]1O)n1cnc2c1ncnc2N	0	C362H121N96O108S4+5	valid
1ii5	refined	Protein-Ligand	1.6	Kd=240nM	Kd	6.62	2001	hypothetical protein slr1257	GLU	P73797	C5H10NO4	148.137	148.061	20	19	102.24	-1.18	-1.45	1	4	2	OC(=O)CC[C@@H](C(=O)O)[NH3+]	0	C265H91N62O73S+3	train
1iig	general	Protein-Ligand	2.6	Ki=27mM	Ki	1.57	2001	triosephosphate isomerase	3PP	P04789	C3H8O5P	155.066	155.011	17	16	111.58	-0.82	-0.8	0	5	1	OC(=O)CCP(O)(O)O	0	C168H53N44O47+4	valid
1iih	refined	Protein-Ligand	2.2	Ki=1.3mM	Ki	2.89	2001	triosephosphate isomerase	3PG	P04789	C3H8O7P	187.065	187.001	19	18	141.04	-1.89	-1.9	1	6	3	OC(=O)[C@@H](COP(O)(O)O)O	0	C247H85N62O68S+3	test
1iiq	refined	Protein-Ligand	1.83	Ki=33nM	Ki	7.48	2002	retropepsin	0ZR	P03367	C38H51N6O7	703.848	703.382	102	104	219.55	2.76	3.19	7	6	25	NC(=O)CC[C@@H](C(=O)N[C@H](C(=O)N)Cc1ccccc1)NC(=O)[C@H](Cc1ccccc1)[NH2+]C[C@@H]([C@@H](NC(=O)OC(C)(C)C)Cc1ccccc1)O	0	C305H102N84O88S+6	train
1ijr	general	Protein-Ligand	2.2	IC50=3.6uM	IC50	5.44	2002	proto-oncogene tyrosine-protein kinase lck	CC0	P06239	C29H39N3O10P	620.608	620.237	82	84	231.33	2.51	3.61	3	8	14	CC(=O)N[C@H](C(=O)N[C@H](c1ccc(c(c1)C(=O)N)OCC1CCCCC1)C)Cc1ccc(c(c1)P(O)(O)O)OCC(=O)O	0	C201H64N54O52S2+6	train
1ik4	refined	Protein-Ligand	2	Ki=39nM	Ki	7.41	2001	methylglyoxal synthase	PGH	P0A731	C2H7NO6P	172.054	172.001	17	16	132.84	-2.86	-1.45	2	5	4	ONC(=O)COP(O)(O)O	0	C254H79N65O68S3+4	valid
1ikt	refined	Protein-Ligand	1.75	Kd=400uM	Kd	3.4	2001	estradiol 17 beta-dehydrogenase 4	OXN	P51659	C21H36O4	352.508	352.261	61	61	36.92	4.85	4.46	0	0	13	COCCOCCOCCOc1ccc(cc1)C(CC(C)(C)C)(C)C	0	C341H105N82O81S3+9	train
1ikv	general	Protein-Ligand	3	IC50=520nM	IC50	6.28	2001	hiv-1 reverse transcriptase	EFZ	P03366	C14H9ClF3NO2	315.675	315.027	30	32	38.33	4.01	4.21	1	1	1	FC([C@@]1(C#CC2CC2)OC(=O)Nc2c1cc(Cl)cc2)(F)F	0	C284H79N66O74S+8	test
1ikw	general	Protein-Ligand	3	IC50=2.5nM	IC50	8.6	2001	hiv-1 reverse transcriptase	EFZ	P03366	C14H9ClF3NO2	315.675	315.027	30	32	38.33	4.01	4.21	1	1	1	FC([C@@]1(C#CC2CC2)OC(=O)Nc2c1cc(Cl)cc2)(F)F	0	C293H79N69O76S+8	train
1ikx	general	Protein-Ligand	2.8	IC50=7.0nM	IC50	8.15	2001	hiv-1 reverse transcriptase	PNU	P03366	C13H11ClN4OS	306.771	306.034	31	33	103.13	2.93	4.29	1	3	3	Nc1nc(nc(c1)Cl)S[C@H](c1ncc2c(c1)cco2)C	0	C315H89N74O81S+7	test
1iky	general	Protein-Ligand	3	IC50=5.5nM	IC50	8.26	2001	hiv-1 reverse transcriptase	MSD	P03366	C19H18N4O3S	382.436	382.11	45	47	139.36	2.31	3.18	3	4	8	COc1ccc(c(c1[C@H]1C[C@H]1NC(=S)Nc1ccc(cn1)C#N)O)C(=O)C	0	C322H93N77O86S+8	test
1il3	general	Protein-Ligand	2.8	IC50=2.8mM	IC50	2.55	2002	ricin a chain	7DG	P02879	C6H6N4O	150.138	150.054	17	18	87.56	-0.76	0.41	3	1	0	Nc1[nH]c(=O)c2c(n1)[nH]cc2	0	C207H67N55O56S+4	train
1il4	general	Protein-Ligand	2.6	IC50=1.4mM	IC50	2.85	2002	ricin a chain	9DG	P02879	C6H6N4O	150.138	150.054	17	18	87.56	-0.76	0.41	3	1	0	Nc1nc2cc[nH]c2c(=O)[nH]1	0	C233H78N58O61S+4	train
1il5	general	Protein-Ligand	2.8	IC50=2.2mM	IC50	2.66	2002	ricin a chain	DDP	P02879	C4H6N4O2	142.116	142.049	16	16	118.28	-0.87	0.21	4	4	2	Nc1nc(O)c(c(n1)O)N	0	C212H68N58O57+5	train
1ilh	general	Protein-Ligand	2.76	Kd=41nM	Kd	7.39	2001	orphan nuclear receptor pxr	SRL	O75469	C24H42O7P2	504.534	504.241	75	75	110.91	5.23	7.82	1	3	14	CCOP(=O)(C(=Cc1cc(c(c(c1)C(C)(C)C)O)C(C)(C)C)P(=O)(OCC)OCC)OCC	0	C438H128N102O105S9+7	valid
1imx	general	Protein-Ligand	1.82	Kd=300uM	Kd	3.52	2001	insulin-like growth factor 1a	CPQ	P05019	C42H75N3O15	862.056	861.52	135	138	321.27	-2.12	-2.11	14	15	37	OC[C@H]([C@H]([C@@H]([C@H](C(=O)NCCCN(C(=O)CC[C@H]([C@H]1CC[C@@H]2[C@]1(C)[C@@H](O)C[C@H]1[C@H]2CC[C@H]2[C@]1(C)CC[C@H](C2)O)C)CCCNC(=O)[C@@H]([C@H]([C@@H]([C@@H](CO)O)O)O)O)O)O)O)O	0	C171H52N49O53S7+5	valid
1inc	general	Protein-Ligand	1.94	Ki=0.46nM	Ki	9.34	1994	elastase	ICL	P00772	C17H23ClN2O4	354.829	354.135	47	47	84.5	3.84	4.1	2	3	9	O=Cc1c(cccc1Cl)NC(=O)[C@H](C(C)C)NC(=O)OC(C)(C)C	0	C232H82N68O71S3+4	train
1ind	general	Protein-Ligand	2.2	Kd=0.09nM	Kd	10.05	1993	antibody fab fragment	EOT		C20H30N4O9S	502.539	502.173	64	64	234.46	-1.4	-3.55	5	9	15	OCCNC(=S)Nc1ccc(cc1)C[C@H]([NH+](CC(=O)O)CC(=O)O)C[NH+](CC(=O)O)CC(=O)O	1	C167H53InN45O48S+3	train
1inh	general	Protein-Ligand	2.4	IC50=5mM	IC50	2.3	1996	INFLUENZA A SUBTYPE N2 NEURAMINIDASE	ST6	P06820	C11H14N3O4	252.247	252.098	32	32	123.14	-2.3	-0.33	3	4	5	[NH3+]CC(=O)Nc1cc(ccc1NC(=O)C)C(=O)O	0	C247H104N81O85S+9	test
1inq	general	Protein-Ligand	2.2	IC50=539nM	IC50	6.27	2002	h-2 class i histocompatibility antigen, d-b	9-mer	Q9D8V0 P01899 P01887	C49H73N10O13	1010.16	1009.54	145	147	374.22	0.52	0.99	13	13	38	OC[C@@H](C(=O)N[C@H](C(=O)N[C@H](C(=O)NCC(=O)N[C@H](C(=O)N[C@H](C(=O)N[C@H](C(=O)N[C@H](C(=O)O)CC(C)C)Cc1ccc(cc1)O)Cc1c[nH]c2c1cccc2)C(C)C)C(C)C)C(C)C)NC(=O)[C@H](CO)[NH3+]	0	C387H106N99O103S3+10	train
1iq1	general	Protein-Ligand	2.8	Kd=35nM	Kd	7.46	2001	Importin-α	11-mer	P52293	C36H73N15O9	860.06	859.572	133	132	442.29	-2.17	-4.28	10	9	37	[NH3+]CCCC[C@@H](C(=O)N[C@H](C(=O)N[C@H](C(=O)N[C@H](C(=O)N[C@H](C(=O)O)C(C)C)CC(=O)N)CCC[NH+]=C(N)N)CCC[NH+]=C(N)N)NC(=O)[C@@H](NC(=O)[C@@H]([NH3+])C)CC(C)C	0	C347H116N97O109S+8	train
1irs	general	Protein-Ligand	NMR	Kd=6uM	Kd	5.22	1997	PTB domain of insulin receptor substrate-1(IRS-1)	11-mer	P35568 P24394	C52H89N15O18P	1243.33	1242.62	175	176	559.99	-3.04	-2.71	12	17	45	CC[C@@H]([C@@H](C(=O)N[C@H](C(=O)NCC(=O)N[C@H](C(=O)N1CCC[C@H]1C(=O)N[C@H](C(=O)N[C@H](C(=O)N[C@H](C(=O)N[C@H](C(=O)O)CO)CCC[NH+]=C(N)N)Cc1ccc(cc1)OP(O)(O)O)C)CC(=O)N)C)NC(=O)[C@H](C(C)C)NC(=O)[C@H](CC(C)C)[NH3+])C	0	C225H68N73O65S5+8	test
1is0	general	Protein-Ligand	1.9	Kd=0.1uM	Kd	7	2002	tyrosine kinase C-src	4-mer	P00524	C28H40N4O14P	687.609	687.228	87	88	311.81	2.05	0.67	4	13	19	CC[C@@H]([C@@H](C(=O)O)NC(=O)[C@@H](NC(=O)[C@@H](NC(=O)[C@H]1[C@@H]([C@@H]1c1ccc(cc1)OP(O)(O)O)C(=O)NC)CCC(=O)O)CCC(=O)O)C	0	C225H82N71O70S2+11	test
1it6	general	Protein-Ligand	2	Ki=4.1nM	Ki	8.39	2002	serine/threonine protein phosphatase pp1-gamma	CYU	P36873	C42H66N2O11P	805.954	805.44	122	124	221.71	6.45	6.86	3	8	20	CO[C@H]([C@H]1O[C@@]2(C([C@H]1OP(O)(O)O)(C)C)C[C@@H](O)[C@@H]([C@@H](O2)C/C=C/c1coc(n1)[C@H](CC)C)C)C[C@@H]([C@@H]([C@@H]([C@@H](/C=C(/C(=C/C=C/C(=C\C#N)/C)/C)\C)C)O)C)O	1	C321H114Mn2N88O103S2+7	test
1iup	general	Protein-Ligand	1.6	Ki=2.9mM	Ki	2.54	2002	meta-cleavage product hydrolase	ALQ	P96965	C4H8O2	88.105	88.052	14	13	37.3	2.03	0.73	0	2	0	CC(C(=O)O)C	0	C184H52N44O46S+3	train
1ivp	refined	Protein-Ligand	2.5	Ki=30nM	Ki	7.52	1993	hiv-2 protease	1ZK	P04584	C45H59N7O7	809.993	809.448	118	122	204.5	6.41	6.13	6	8	26	CC[C@@H]([C@@H](C(=O)NCc1ccccn1)NC(=O)[C@@H]([C@H](C(=O)[C@@H](NC(=O)[C@H](Cc1[nH]cnc1)NC(=O)COc1cccc2c1cccc2)CC1CCCCC1)O)C(C)C)C	0	C297H101N79O90S+5	valid
1iy7	refined	Protein-Ligand	2	Ki=0.64uM	Ki	6.19	2003	carboxypeptidase a	CXA	P00730	C9H12N2O4S	244.268	244.052	28	28	117.87	1.13	1.65	2	4	4	OC(=O)[C@@H](NS(=O)(=O)N)Cc1ccccc1	1	C292H95N71O80Zn+3	train
1izh	refined	Protein-Ligand	1.9	Ki=0.02uM	Ki	7.7	2002	HIV-1 protease	Q50	Q90EB9	C38H49N5O7	687.825	687.363	99	101	202.94	3.45	5.27	6	6	24	NC(=O)CC[C@@H](C(=O)N[C@H](C(=O)N)Cc1ccccc1)NC(=O)[C@@H](C[C@@H]([C@@H](NC(=O)OC(C)(C)C)Cc1ccccc1)O)Cc1ccccc1	0	C336H107N89O95S2+6	test
1j01	refined	Protein-Ligand	2	Ki=0.34uM	Ki	6.47	2002	xylanase beta-1,4	XIL	P07986	C10H17NO7	263.244	263.101	35	36	128.48	-3.09	-2.98	5	5	6	O[C@@H]1C(=O)NCC[C@H]1O[C@@H]1OC[C@H]([C@@H]([C@H]1O)O)O	0	C223H90N66O72+7	train
1j07	general	Protein-Ligand	2.35	Ki=0.021uM	Ki	7.68	2003	acetylcholinesterase	DCU	P21836	C32H44N4	484.719	484.357	80	83	55.92	7.45	8.1	2	0	12	Nc1ccc2c(c1)c(c1ccccc1)[n+](c1c2ccc(c1)N)CCCCCCCCCC[N+](C)(C)C	0	C261H80N65O69+4	train
1j14	refined	Protein-Ligand	2.4	Ki=32.2uM	Ki	4.49	2002	trypsin beta	BEN	P00763	C7H9N2	121.16	121.077	18	18	51.61	2.71	-0.15	0	0	1	NC(=[NH2+])c1ccccc1	0	C205H74N52O62S5+2	train
1j15	general	Protein-Ligand	2	Ki=143uM	Ki	3.84	2002	trypsin ii, anionic	BEN	P00763	C7H9N2	121.16	121.077	18	18	51.61	2.71	-0.15	0	0	1	NC(=[NH2+])c1ccccc1	0	C201H73N52O60S5+2	train
1j16	refined	Protein-Ligand	1.6	Ki=143uM	Ki	3.84	2002	trypsin beta	BEN	P00763	C7H9N2	121.16	121.077	18	18	51.61	2.71	-0.15	0	0	1	NC(=[NH2+])c1ccccc1	0	C201H73N52O60S5+2	train
1j17	refined	Protein-Ligand	2	Ki=6.05uM	Ki	5.22	2002	trypsin beta	ZEN	P00763	C25H27ClN4O3S	499.025	498.149	61	65	82.2	3.42	4.66	0	4	5	Clc1ccc2c(c1)ccc(c2)S(=O)(=O)N1CCN(CC1)C(=O)C1CCN(CC1)c1ccncc1	0	C273H98N69O83S6+3	train
1j1a	general	Protein-Ligand	2.2	IC50=0.029uM	IC50	7.54	2003	phospholipase a2	BHP	P14555	C31H37NO4	487.63	487.272	73	75	75.63	8.2	6.74	1	3	16	OC(=O)CC[C@@H](Cc1ccc(cc1)OCc1ccccc1)NC(=O)CCCCCCc1ccccc1	1	C408H137CaN103O108S9+12	train
1j36	refined	Protein-Ligand	2.4	Ki=18nM	Ki	7.74	2003	angiotensin converting enzyme	LPR	Q10714	C21H31N3O5	405.488	405.226	60	61	139.16	-1.33	-0.79	2	5	11	[NH3+]CCCC[C@@H](C(=O)N1CC=C[C@H]1C(=O)O)[NH2+][C@H](C(=O)O)CCc1ccccc1	1	C380H135N99O109S4Zn+9	train
1j37	refined	Protein-Ligand	2.4	Ki=1.1nM	Ki	8.96	2003	angiotensin converting enzyme	X8Z	Q10714	C9H15NO3S	217.285	217.077	29	29	96.41	1.52	0.57	0	3	4	SC[C@H](C(=O)N1CCC[C@H]1C(=O)O)C	1	C257H94N72O72S3Zn+7	test
1j4k	general	Protein-Ligand	NMR	Kd=100uM	Kd	4	2001	protein kinase spk1	7-mer	P14737 P22216	C43H62N7O19P	1011.96	1011.38	132	133	455.18	2.09	0.07	8	18	32	CC[C@@H]([C@@H](C(=O)N[C@H](C(=O)N[C@H](C(=O)N[C@H](C(=O)N[C@H](C(=O)O)CC(=O)O)CC(C)C)Cc1ccc(cc1)O)Cc1ccc(cc1)OP(O)(O)O)NC(=O)[C@@H](NC(=O)[C@H](CCC(=O)O)[NH3+])CC(=O)O)C	0	C180H51N59O48S+8	train
1j4q	general	Protein-Ligand	NMR	Kd=0.36uM	Kd	6.44	2001	protein kinase spk1	13-mer	P14737 P22216	C58H101N14O27P	1457.47	1456.67	201	200	693.1	-2.85	-2.76	16	26	56	OC[C@@H](C(=O)N[C@H](C(=O)N[C@H](C(=O)N[C@H](C(=O)N[C@@H]([C@H](OP(O)(O)O)C)C(=O)N[C@H](C(=O)N[C@H](C(=O)N[C@H](C(=O)N[C@H](C(=O)N[C@H](C(=O)N[C@H](C(=O)N[C@H](C(=O)N[C@H](C(=O)O)CCC(=O)N)C(C)C)CC(C)C)[C@H](O)C)C)CC(=O)O)C)CCC(=O)O)C(C)C)CCC(=O)O)CC(C)C)[NH3+]	0	C127H45N42O43+5	train
1j4r	refined	Protein-Ligand	1.8	Ki=0.019uM	Ki	7.72	2001	FK506 binding protein	001	P62942	C35H42F2N2O6	624.715	624.301	87	90	87.19	7.11	6.48	0	3	17	COc1cc(cc(c1OC)OC)C(C(=O)N1CCCC[C@H]1C(=O)O[C@H](CCCc1cccnc1)CCCc1ccccc1)(F)F	0	C271H84N67O66S3+7	train
1j5i	general	Protein-Ligand	NMR	Kd=230uM	Kd	3.64	2002	neocarzinostatin	NCZ	P0A3R9	C18H18O6	330.332	330.11	42	44	96.22	2.55	1.68	3	4	7	COc1cc(C)c2c(c1)c(C(=O)O[C@@H]1[C@@H](O)C=C[C@H]1O)c(cc2)O	0	C201H60N50O64S3	train
1jak	refined	Protein-Ligand	1.75	Ki=2.7uM	Ki	5.57	2001	beta-n-acetylhexosaminidase	IFG	O85361	C8H17N2O4	205.232	205.119	31	31	106.4	-2.06	-1.68	5	4	6	OC[C@H]1C[NH2+][C@@H]([C@H]([C@H]1O)O)NC(=O)C	0	C291H112N81O90S3+6	train
1jao	refined	Protein-Ligand	2.4	Ki=1.2uM	Ki	5.92	1996	matrix metalloproteinase-8	0D3	P22894	C15H21N3O3S	323.411	323.13	43	43	140.09	0.44	1.36	3	3	11	SC[C@H](C(=O)N[C@H](C(=O)NCC(=O)N)C)Cc1ccccc1	1	C266H84CaN66O68SZn+5	valid
1jaq	refined	Protein-Ligand	2.25	Ki=33uM	Ki	4.48	1996	matrix metalloproteinase-8	01S	P22894	C12H22N4O5	302.327	302.159	43	42	150.62	-1.09	0.13	5	5	12	ONC(=O)[C@H](C(=O)N[C@H](C(=O)NCC(=O)N)C)CC(C)C	1	C238H70CaN60O57SZn+5	test
1jcx	refined	Protein-Ligand	1.8	Ki=7.0uM	Ki	5.15	2002	2-dehydro-3-deoxyphosphooctonate aldolase	PAI	O66496	C9H24NO13P2	416.233	416.072	49	48	280.45	-7.84	-6.23	5	12	13	OC(=O)C[N@H+](CP(O)(O)O)C[C@H]([C@H]([C@@H]([C@@H](COP(O)(O)O)O)O)O)O	1	C314H124CdN94O100S+9	test
1jd0	general	Protein-Ligand	1.5	Ki=5.7nM	Ki	8.24	2001	extracellular domain of human zinc enzyme carbonic anhydrase XII	AZM	O43570	C4H6N4O3S2	222.245	221.988	19	19	151.66	-1.23	1	2	5	3	CC(=O)Nc1nnc(s1)S(=O)(=O)N	1	C300H98N81O78S2Zn+5	train
1jd5	general	Protein-Ligand	1.9	Kd=0.24uM	Kd	6.62	2001	apoptosis 1 inhibitor	10-mer	Q24570 Q24306	C45H65N8O12	910.044	909.472	130	132	317.38	2.46	1.66	8	12	30	CC[C@@H]([C@@H](C(=O)N1CCC[C@H]1C(=O)N[C@H](C(=O)O)CC(=O)O)NC(=O)[C@@H](NC(=O)[C@@H](NC(=O)[C@@H](NC(=O)[C@H]([C@H](CC)C)NC(=O)[C@@H]([NH3+])C)C)Cc1ccc(cc1)O)Cc1ccccc1)C	0	C224H78N61O73S4+4	train
1jd6	general	Protein-Ligand	2.7	Kd=0.041uM	Kd	7.39	2001	apoptosis 1 inhibitor	10-mer	Q24106 Q24306	C47H67N8O11	920.082	919.493	133	136	288.36	1.81	1.81	7	11	30	O=C[C@@H](NC(=O)[C@@H]1CCCN1C(=O)[C@@H](NC(=O)[C@H](Cc1ccc(cc1)O)NC(=O)[C@H](Cc1ccccc1)NC(=O)[C@@H]1CCCN1C(=O)[C@H](C(C)C)NC(=O)[C@@H]([NH3+])C)CC(C)C)CCC(=O)O	0	C239H72N63O72S3+3	train
1jdj	general	Protein-Ligand	2.2	IC50=5mM	IC50	2.3	2002	GLYCEROL-3-PHOSPHATE DEHYDROGENASE	CFP	P90551	C5H2ClFN4	172.548	171.995	13	14	54.46	1.5	1.15	1	3	0	Fc1nc(Cl)c2c(n1)[nH]cn2	0	C174H55N38O42S+	valid
1jet	refined	Protein-Ligand	1.2	Kd=56nM	Kd	7.25	1997	oligo-peptide binding protein	3-mer	P06202	C15H34N5O4	348.462	348.261	58	57	178.42	-3.09	-2.72	5	4	14	[NH3+]CCCC[C@@H](C(=O)N[C@H](C(=O)N[C@H](C(=O)O)CCCC[NH3+])C)[NH3+]	0	C415H147N111O123S3+8	train
1jeu	refined	Protein-Ligand	1.25	Kd=150nM	Kd	6.82	1997	oligo-peptide binding protein	3-mer	P06202	C17H36N5O6	406.498	406.267	64	63	215.72	-4.44	-2.88	5	6	16	[NH3+]CCCC[C@@H](C(=O)N[C@H](C(=O)N[C@H](C(=O)O)CCCC[NH3+])CCC(=O)O)[NH3+]	0	C414H141N110O125S4+6	valid
1jev	refined	Protein-Ligand	1.3	Kd=130nM	Kd	6.89	1997	oligo-peptide binding protein	3-mer	P06202	C23H39N6O4	463.594	463.303	72	73	194.21	-1.38	-1.02	6	4	16	[NH3+]CCCC[C@@H](C(=O)N[C@H](C(=O)N[C@H](C(=O)O)CCCC[NH3+])Cc1c[nH]c2c1cccc2)[NH3+]	0	C457H156N125O136S4+8	valid
1jfh	general	Protein-Ligand	2.03	Ki=9mM	Ki	2.05	1998	alpha-amylase	MA2-MA3	P00690	C14H26O9S2	402.481	402.102	51	52	199.67	-2.62	-2.66	6	6	12	OC[C@H]1O[C@H](OC)[C@@H]([C@H]([C@@H]1S[C@H]1O[C@H](CO)[C@H]([C@@H]([C@H]1O)O)SC)O)O	0	C303H100N88O84S3+6	train
1jg0	general	Protein-Ligand	2	IC50=5.0uM	IC50	5.3	2002	thymidylate synthase	DDT	P0A884	C33H33N3O7S2	647.761	647.176	78	82	150.08	7.2	7.42	1	6	10	OC(=O)[C@@H](NS(=O)(=O)c1cccc2c1cccc2N(C)C)Cc1ccc(cc1)OS(=O)(=O)c1cccc2c1cccc2N(C)C	0	C364H119N92O89S3+5	test
1jgl	refined	Protein-Ligand	2.15	Kd=2nM	Kd	8.7	2001	ig kappa-chain	EST	Q7TS98	C18H24O2	272.382	272.178	44	47	40.46	3.9	3.61	2	2	2	Oc1ccc2c(c1)CC[C@@H]1[C@@H]2CC[C@]2([C@H]1CC[C@@H]2O)C	0	C283H68N64O64S2	train
1jh1	general	Protein-Ligand	2.7	Ki=41uM	Ki	4.39	2001	matrix metalloproteinase 8	JST	P22894	C12H12ClN3S	265.762	265.044	29	30	62.05	3.58	2.69	1	0	3	C=CC/N=C\1/SCC(=NN1)c1ccc(cc1)Cl	1	C280H86CaN68O73SZn+5	train
1jik	general	Protein-Ligand	2.8	IC50=0.2nM	IC50	9.7	2001	tyrosyl-trna synthetase	545	A6QHR2	C21H35N3O9	473.517	473.237	68	69	208.86	-0.76	-2.57	9	8	18	CCCCOC(=O)[C@H]([C@@H]1[N@@H+](O)C[C@@H]([C@@]([C@H]1O)(O)CO)O)NC(=O)[C@H](Cc1ccc(cc1)O)[NH3+]	0	C419H123N107O111S3+4	train
1jil	general	Protein-Ligand	2.2	IC50=4nM	IC50	8.4	2001	tyrosyl-trna synthetase	485	A6QHR2	C17H25N2O8	385.389	385.161	52	53	184.19	-2.68	-2.62	6	7	10	O=C([C@H](Cc1ccc(cc1)O)[NH3+])N[C@@H]([C@@H]1O[C@H](C)[C@@H]([C@@H]([C@H]1O)O)O)C(=O)O	0	C376H113N98O100S3+4	valid
1jiz	general	Protein-Ligand	2.6	IC50=2.0nM	IC50	8.7	2002	macrophage metalloelastase (mmp-12)	CGS	P39900	C18H21N3O5S	391.441	391.12	48	49	114.38	2.15	3.68	0	5	8	O=NC(=O)[C@H](N(S(=O)(=O)c1ccc(cc1)OC)Cc1cccnc1)C(C)C	1	C247H79CaN61O60S2Zn+6	train
1jj9	general	Protein-Ligand	2	IC50=1.7uM	IC50	5.77	2001	matrix metalloproteinase 8	BBT	P22894	C17H22N3O4	332.374	332.161	46	48	99.94	0.91	1.15	4	4	5	OCC[C@@H]1CC[N@H+](CC1)C1(C(=O)NC(=O)NC1=O)c1ccccc1	1	C221H67CaN57O55SZn+5	train
1jje	general	Protein-Ligand	1.8	IC50=3.7nM	IC50	8.43	2001	metallo-beta-lactamase imp-1	BYS	Q79MP6	C19H18O6	342.343	342.11	43	45	93.06	5.42	2.6	0	4	5	OC(=O)[C@H]([C@@H](C(=O)O)Cc1ccccc1)Cc1ccc2c(c1)OCO2	1	C238H75N66O69SZn2+6	test
1jjt	general	Protein-Ligand	1.8	IC50=9nM	IC50	8.05	2001	metallo-beta-lactamase imp-1	BDS	Q79MP6	C20H18O8	386.352	386.1	46	49	111.52	5.23	2.33	0	4	5	OC(=O)[C@H]([C@@H](C(=O)O)Cc1ccc2c(c1)OCO2)Cc1ccc2c(c1)OCO2	1	C246H82N69O74SZn2+7	train
1jk7	general	Protein-Ligand	1.9	IC50=3nM	IC50	8.52	2001	human Protein phosphatase-1 (PP1)	OKA	P36873	C44H68O13	805.003	804.466	125	131	182.83	4.29	5.21	4	6	13	CC1=C[C@]2(O[C@@H](C1)[C@@H](/C=C/[C@H]1CC[C@]3(O1)CC[C@@H]1[C@@H](O3)[C@H](O)C(=C)[C@H](O1)[C@H](C[C@@H]([C@H]1O[C@@]3(CCCCO3)CC[C@H]1C)C)O)C)O[C@@H](CC[C@H]2O)C[C@](C(=O)O)(O)C	1	C271H103Mn2N85O88S3+8	train
1jld	general	Protein-Ligand	2.5	IC50=185nM	IC50	6.73	1997	hiv-2 protease	0PP	P04584	C37H51N5O6	661.831	661.384	99	101	169.75	4.45	4.84	6	7	23	CCC(NC(=O)C[C@H](C(C)(C)C)C(=O)NC[C@H]([C@H](Cc1ccccc1)NC(=O)[C@H]([C@H](O)C)NC(=O)c1ccc2c(n1)cccc2)O)CC	0	C362H118N97O108S2+7	train
1jlq	general	Protein-Ligand	3	IC50=0.007uM	IC50	8.15	2001	hiv-1 reverse transcriptase, a-chain	SBN	P04585	C15H14N2O2S	286.349	286.078	34	35	92.33	3.04	4.25	1	3	2	N#Cc1c(N)cccc1S(=O)(=O)c1cc(C)cc(c1)C	0	C304H79N73O76S+6	train
1jlr	refined	Protein-Ligand	2.45	Kd=465uM	Kd	3.33	2002	uracil phosphoribosyltransferase	GTP	Q26998	C10H19N5O14P3	526.204	526.014	51	53	349.35	-6.9	-3.07	4	11	9	O[C@@H]1[C@@H](COP(OP(OP(O)(O)O)(O)O)(O)O)O[C@H]([C@@H]1O)n1cnc2c1nc(N)[nH]c2=O	0	C259H90N68O66S5+7	test
1jlx	general	Protein-Ligand	2.2	IC50=1.6uM	IC50	5.8	1997	agglutinin	3-mer	Q71QF2	C21H31NO11	473.471	473.19	64	66	187.4	-2.15	-2.64	7	7	15	OC[C@H]1O[C@H](OCc2ccccc2)[C@@H]([C@H]([C@H]1O)O[C@@H]1O[C@H](CO)[C@@H]([C@@H]([C@H]1O)O)O)NC(=O)C	0	C214H66N56O55S+3	train
1jmf	refined	Protein-Ligand	2.5	Kd=1.7uM	Kd	5.77	1998	thymidylate synthase	UMP	P00469	C9H14N2O8P	309.19	309.049	34	35	167.83	-3.14	-2.14	2	6	4	O[C@H]1C[C@@H](O[C@@H]1COP(O)(O)O)n1ccc(=O)[nH]c1=O	0	C304H113N79O74S2+7	train
1jmg	refined	Protein-Ligand	2.5	Kd=0.85uM	Kd	6.07	1998	thymidylate synthase	UMP	P00469	C9H14N2O8P	309.19	309.049	34	35	167.83	-3.14	-2.14	2	6	4	O[C@H]1C[C@@H](O[C@@H]1COP(O)(O)O)n1ccc(=O)[nH]c1=O	0	C298H103N83O76S+6	valid
1jmi	general	Protein-Ligand	2.5	Kd=0.87uM	Kd	6.06	1998	thymidylate synthase	UMP	P00469	C9H14N2O8P	309.19	309.049	34	35	167.83	-3.14	-2.14	2	6	4	O[C@H]1C[C@@H](O[C@@H]1COP(O)(O)O)n1ccc(=O)[nH]c1=O	0	C248H80N73O71S+4	train
1jmq	general	Protein-Ligand	NMR	Kd=40uM	Kd	4.4	2001	65 kda yes-associated protein	10-mer	Q96G27 P46937	C46H69N10O14	986.099	985.499	139	143	352.37	-3.02	-2.6	9	14	31	[NH3+]CC(=O)N[C@H](C(=O)N1CCC[C@H]1C(=O)N1CCC[C@H]1C(=O)N1CCC[C@H]1C(=O)N1CCC[C@H]1C(=O)N[C@H](C(=O)N[C@H](C(=O)N[C@H](C(=O)NCC(=O)O)C(C)C)[C@H](O)C)Cc1ccc(cc1)O)[C@H](O)C	0	C132H36N38O40S+4	test
1jn2	general	Protein-Ligand	1.9	Kd=82uM	Kd	4.09	2003	concanavalin a	SFP	P02866	C22H27N3O6S2	493.596	493.134	60	62	239.81	2.45	7.06	3	6	4	C/C(=C(/c1ccc([nH]1)/C(=C(\N)/C)/c1ccc(cc1)S(O)(O)O)\c1ccc(cc1)S(O)(O)O)/N	1	C182H64CaN52O65+4	train
1jn4	refined	Protein-Ligand	1.8	Ki=11.3uM	Ki	4.95	2003	ribonuclease a	139	P61823	C19H27N7O14P2	639.404	639.109	69	73	339.42	-5.7	-2.82	5	12	13	OC[C@H]1O[C@H](C[C@@H]1OP(OP(OC[C@H]1O[C@H]([C@@H]([C@@H]1O)O)n1cnc2c1ncnc2N)(O)O)(O)O)n1ccc(=O)[nH]c1=O	0	C243H83N69O71S5+7	train
1joc	general	Protein-Ligand	2.2	Kd=24uM	Kd	4.62	2001	early endosomal autoantigen 1	ITP	Q15075	C6H16O12P2	342.132	342.012	36	36	247.94	-6.22	-4.48	4	10	6	O[C@@H]1[C@H](OP(O)(O)O)[C@@H](O)[C@@H]([C@H]([C@@H]1OP(O)(O)O)O)O	0	C145H49N49O39S+7	train
1joj	general	Protein-Ligand	3	IC50=0.06mM	IC50	4.22	2001	concanavalin a	7-mer	P02866	C50H58N8O10S	963.108	962.4	127	132	310.68	3.98	4.82	10	10	31	CSCC[C@@H](C(=O)N[C@H](C(=O)N[C@H](C(=O)N[C@H](C(=O)N1CCC[C@H]1C(=O)N[C@H](C(=O)N)Cc1ccc(cc1)O)Cc1ccc(cc1)O)Cc1c[nH]c2c1cccc2)Cc1ccc(cc1)O)NC(=O)C	0	C172H59N45O55S+5	valid
1jp5	general	Protein-Ligand	2.7	Ki=0.6nM	Ki	9.22	2001	single-chain fv fragment 1696	9-mer		C37H57N8O8	741.897	741.43	110	112	258.29	1.16	3.02	9	8	27	O=C[C@H](Cc1c[nH]c2c1cccc2)NC(=O)[C@@H](NC(=O)[C@H]([C@H](O)C)NC(=O)[C@H]([C@H](CC)C)NC(=O)[C@@H](NC(=O)[C@H]1[NH2+]CCC1)CCC(=O)N)CC(C)C	0	C321H95N79O92S+4	train
1jq3	general	Protein-Ligand	1.8	IC50=0.2uM	IC50	6.7	2001	spermidine synthase	AAT	Q9WZC2	C18H33N7O3S	427.565	427.237	62	64	199.89	-1.15	-0.86	5	5	13	[NH3+]CCCCC[C@@H](SC[C@H]1O[C@H]([C@@H]([C@@H]1O)O)n1cnc2c1ncnc2N)CC[NH3+]	0	C435H160N98O133S3+3	test
1jq8	refined	Protein-Ligand	2	Ki=1.01uM	Ki	6	2002	phospholipase a2	5-mer	P59071	C27H44N5O8	566.667	566.319	84	84	221.8	-0.3	0.24	7	8	21	CC[C@@H]([C@@H](C(=O)N[C@H](C(=O)N[C@H](C(=O)O)CO)Cc1ccc(cc1)O)NC(=O)[C@@H](NC(=O)[C@H](CC(C)C)[NH3+])C)C	0	C228H74N51O63S8+4	train
1jq9	general	Protein-Ligand	1.8	Kd=3.57nM	Kd	8.45	2002	phospholipase a2	5-mer	P59071	C33H50N6O8	658.785	658.369	97	98	249.44	-0.27	-0.17	8	8	25	OC[C@@H](C(=O)N[C@H](C(=O)N[C@H](C(=O)O)CCCC[NH3+])Cc1ccc(cc1)O)NC(=O)[C@@H](NC(=O)[C@H](Cc1ccccc1)[NH3+])CC(C)C	0	C302H88N72O83S9+7	valid
1jqd	general	Protein-Ligand	2.28	Ki=6.9uM	Ki	5.16	2002	histamine n-methyltransferase	SAH	P50135	C14H21N6O5S	385.419	385.129	47	49	209.55	-3.47	-1.57	4	7	8	OC(=O)[C@H](CCSC[C@H]1O[C@H]([C@@H]([C@@H]1O)O)n1cnc2c1ncnc2N)[NH3+]	0	C346H112N80O95S4+8	train
1jqe	general	Protein-Ligand	1.91	Ki=0.36uM	Ki	6.44	2002	histamine n-methyltransferase	QUN	P50135	C23H31ClN3O	400.965	400.216	59	61	38.59	6.03	4.63	2	1	9	CC[NH+](CCC[C@H](Nc1c2cc(OC)ccc2nc2c1ccc(c2)Cl)C)CC	0	C366H110N87O105S4+6	valid
1jqy	refined	Protein-Ligand	2.14	Ki=12uM	Ki	4.92	2002	heat-labile enterotoxin b	A32	P32890	C20H30N3O10	472.466	472.193	63	65	187.97	-1.11	-0.71	6	7	13	OC[C@H]1O[C@H](Oc2cc(cc(c2)N(=O)=O)C(=O)NCCC[NH+]2CCOCC2)[C@@H]([C@H]([C@H]1O)O)O	0	C213H67N63O70S3+5	test
1jr1	general	Protein-Ligand	2.6	Ki=6nM	Ki	8.22	2001	inosine-5'-monophosphate dehydrogenase 2	MOA	P12269	C17H20O6	320.337	320.126	43	44	93.06	4.64	2.73	1	4	6	COc1c(C/C=C(/CCC(=O)O)\C)c(O)c2c(c1C)COC2=O	0	C347H118N101O106S8+3	train
1jrs	general	Protein-Ligand	1.8	Ki=0.4uM	Ki	6.4	1996	trypsin	3-mer	P00760	C20H41N6O4	429.577	429.319	71	70	173.54	2.33	0.25	4	4	18	OC[C@@H](NC(=O)[C@@H](NC(=O)[C@@H](NC(=O)C)CC(C)C)CC(C)C)CCC[NH+]=C(N)N	0	C263H89N68O82S5+3	train
1jsv	refined	Protein-Ligand	1.96	Ki=2uM	Ki	5.7	2001	cell division protein kinase 2	U55	P24941	C10H11N5O2S	265.292	265.063	29	30	132.37	0.29	2.89	3	4	3	Nc1ncnc(c1)Nc1ccc(cc1)S(=O)(=O)N	0	C258H72N59O62S+7	train
1jt1	general	Protein-Ligand	1.78	Ki=400uM	Ki	3.4	2003	metallo-beta-lactamase	MCO	Q9K578	C9H15NO3S	217.285	217.077	29	29	96.41	1.52	0.57	0	3	4	SC[C@@H](C(=O)N1CCC[C@@H]1C(=O)O)C	1	C218H83N56O63S2Zn2+6	train
1jtq	general	Protein-Ligand	2.5	Ki=8.5nM	Ki	8.07	2001	thymidylate synthase	LY3	P0A884	C20H21N9O4	451.439	451.172	54	57	208.42	1.22	0.92	5	7	9	Nc1nc2[nH]cc(c2c(=O)[nH]1)CCc1ccc(cc1)C(=O)N[C@H](C(=O)O)CCc1[nH]nnn1	0	C327H116N93O87S3+10	valid
1juf	general	Protein-Ligand	2	IC50=1400nM	IC50	5.85	2002	h2-db major histocompatibility antigen	9-mer	Q9D8V0 P01899 P01887	C50H75N10O13	1024.19	1023.55	148	150	374.22	0.88	1.38	13	13	39	CC[C@@H]([C@@H](C(=O)NCC(=O)N[C@H](C(=O)N[C@H](C(=O)N[C@H](C(=O)N[C@H](C(=O)O)CC(C)C)Cc1ccc(cc1)O)Cc1c[nH]c2c1cccc2)C(C)C)NC(=O)[C@H](C(C)C)NC(=O)[C@@H](NC(=O)[C@H](CO)[NH3+])CO)C	0	C391H101N92O107S4+7	test
1juj	general	Protein-Ligand	3	Ki=109nM	Ki	6.96	2001	thymidylate synthase	LYA	P04818	C20H21N5O6	427.411	427.149	52	54	191.26	2.55	1.64	4	6	8	OC(=O)CC[C@@H](C(=O)O)NC(=O)c1ccc(cc1)CCc1c[nH]c2c1c(=O)[nH]c(n2)N	0	C375H122N104O95S4+11	train
1jut	general	Protein-Ligand	2.7	Ki=47.7nM	Ki	7.32	2001	thymidylate synthase	LYD	P0A884	C20H23N5O4	397.428	397.175	52	54	153.96	2.58	2.43	4	4	7	CC([C@@H](C(=O)O)NC(=O)c1ccc(cc1)CCc1c[nH]c2c1c(=O)[nH]c(n2)N)C	0	C352H115N99O82S3+10	valid
1juy	general	Protein-Ligand	2.6	Ki=22nM	Ki	7.66	1997	adenylosuccinate synthetase	H5P	P0A7D4	C7H12N2O9P	299.152	299.028	31	32	191.4	-4.58	-3.03	4	7	4	O=C1NC(=O)[C@@]2(N1)O[C@@H]([C@H]([C@H]2O)O)COP(O)(O)O	1	C287H103MgN99O94+10	train
1jvp	general	Protein-Ligand	1.53	IC50=1.6uM	IC50	5.8	2001	cell division protein kinase 2	LIG	P24941	C15H11N3	233.268	233.095	29	32	41.57	2.47	3.04	1	2	1	n1ccc(cc1)c1[nH]nc2c1Cc1c2cccc1	0	C293H81N72O72+10	valid
1jvu	refined	Protein-Ligand	1.78	Ki=7uM	Ki	5.15	2002	Bos taurus ribonuclease A	C2P	P61823	C9H15N3O8P	324.204	324.06	36	37	194.84	-3.47	-2.95	3	6	5	OC[C@H]1O[C@H]([C@@H]([C@@H]1O)OP(O)(O)O)n1ccc(=N)[nH]c1=O	0	C181H64N53O45S2+8	test
1jwt	general	Protein-Ligand	2.5	Ki=14nM	Ki	7.85	2002	thrombin pro	BLI	P00734	C22H33N6O5S	493.6	493.223	67	70	156.46	0.66	1.42	2	5	8	ON/C(=[N+]/1\CC[C@@H](CC1)CNC(=O)[C@@H]1CC[C@@H]2N1C(=O)CN(C2)S(=O)(=O)Cc1ccccc1)/N	0	C304H105N85O91S6+8	valid
1jyi	general	Protein-Ligand	2.75	IC50=100uM	IC50	4	2002	concanavalin A(ConA)	12-mer	P02866	C66H85N12O20	1366.45	1365.6	183	188	505.91	0.04	-0.73	15	20	48	OC[C@@H](C(=O)NCC(=O)N[C@H](C(=O)O)CO)NC(=O)[C@@H](NC(=O)[C@@H](NC(=O)[C@@H]1CCCN1C(=O)[C@@H](NC(=O)[C@@H]1CCCN1C(=O)[C@@H](NC(=O)[C@@H](NC(=O)[C@H](C(C)C)NC(=O)[C@H](CC(=O)O)[NH3+])Cc1ccccc1)Cc1ccc(cc1)O)Cc1ccc(cc1)O)Cc1ccc(cc1)O)C	0	C180H57N44O50S+5	train
1jyq	refined	Protein-Ligand	2	Kd=2nM	Kd	8.7	2002	growth factor receptor-bound protein 2	4-mer	P62993	C31H39N5O15P2	783.613	783.192	92	94	369.96	-0.67	2.19	5	12	19	Nc1cccc(c1)COC(=O)N[C@H](C(=O)N[C@](C(=O)N[C@H](C(=O)O)CC(=O)N)(Cc1ccc(cc1)OP(O)(O)O)C)Cc1ccc(cc1)OP(O)(O)O	0	C221H67N60O63+4	test
1jys	refined	Protein-Ligand	1.9	Ki=300uM	Ki	3.52	2002	mta/sah nucleosidase	ADE	P0AF12	C5H5N5	135.127	135.054	15	16	80.48	-0.25	0.52	2	3	0	Nc1ncnc2c1nc[nH]2	0	C176H65N44O52S+2	test
1jzs	refined	Protein-Ligand	2.5	Ki=0.25uM	Ki	6.6	2001	isoleucyl-tRNA synthetase	MRC	P56690	C26H44O9	500.622	500.299	79	80	146.05	4.47	2.59	3	6	19	OC(=O)CCCCCCCCOC(=O)/C=C(/C[C@@H]1OC[C@@H]([C@H]([C@H]1O)O)C[C@@H]1O[C@H]1[C@H]([C@@H](O)C)C)\C	0	C408H132N109O109S3+10	train
1k03	general	Protein-Ligand	2.7	Kd=1uM	Kd	6	2001	nadph dehydrogenase 1	HBA	Q02899	C7H6O2	122.121	122.037	15	15	37.3	1.03	1.2	1	2	2	O=Cc1ccc(cc1)O	0	C207H72N54O47S+4	valid
1k06	general	Protein-Ligand	1.8	Ki=4.6uM	Ki	5.34	2001	glycogen phosphorylase	BZD	P00489	C14H18N2O7	326.302	326.111	41	42	148.35	-0.77	-1.29	6	6	10	OC[C@H]1O[C@@H](NC(=O)NC(=O)c2ccccc2)[C@@H]([C@H]([C@@H]1O)O)O	0	C344H122N101O105+9	train
1k08	general	Protein-Ligand	2.26	Ki=4.6uM	Ki	5.34	2001	glycogen phosphorylase	BZD	P00489	C14H18N2O7	326.302	326.111	41	42	148.35	-0.77	-1.29	6	6	10	OC[C@H]1O[C@@H](NC(=O)NC(=O)c2ccccc2)[C@@H]([C@H]([C@@H]1O)O)O	0	C353H125N102O107+9	valid
1k1i	refined	Protein-Ligand	2.2	Kd=264nM	Kd	6.58	2001	trypsin beta	FD1	P00760	C26H29N4O5S	509.597	509.186	65	68	163.77	5.8	2.77	1	5	8	OC(=O)[C@H]1CCCCN1C(=O)[C@@H](NS(=O)(=O)c1ccc2c(c1)cccc2)Cc1cccc(c1)C(=[NH2+])N	0	C274H94N74O86S6+4	train
1k1j	refined	Protein-Ligand	2.2	Kd=28nM	Kd	7.55	2001	trypsin beta	FD2	P00760	C27H31N4O5S	523.624	523.202	68	71	152.77	4.79	2.72	1	4	10	COC(=O)[C@@H]1CCN(CC1)C(=O)[C@@H](NS(=O)(=O)c1ccc2c(c1)cccc2)Cc1cccc(c1)C(=[NH2+])N	0	C265H90N71O85S6+3	train
1k1l	refined	Protein-Ligand	2.5	Kd=125nM	Kd	6.9	2001	trypsin beta	FD3	P00760	C24H29N5O3S	467.584	467.199	62	65	143.08	3.79	2.28	2	3	8	O=C([C@@H](NS(=O)(=O)c1ccc2c(c1)cccc2)Cc1cccc(c1)C(=[NH2+])N)N1CC[NH2+]CC1	0	C265H92N70O84S6+3	test
1k1m	refined	Protein-Ligand	2.2	Kd=40nM	Kd	7.4	2001	trypsin beta	FD4	P00760	C26H30N5O4S	508.613	508.202	66	69	146.78	3.72	1.93	1	4	9	O=C([C@@H](NS(=O)(=O)c1ccc2c(c1)cccc2)Cc1cccc(c1)C(=[NH2+])N)N1CCN(CC1)C(=O)C	0	C278H96N73O87S6+4	valid
1k1n	refined	Protein-Ligand	2	Kd=153nM	Kd	6.82	2001	trypsin beta	CCR	P00760	C29H40N5O7S	602.722	602.265	82	84	202.1	5.43	2.45	2	6	13	COc1cc(C)c(c(c1C)C)S(=O)(=O)N[C@H](C(=O)N[C@@H](C(=O)N1CCCCC1)Cc1ccc(cc1)C(=[NH2+])N)CC(=O)O	0	C286H99N75O91S6+3	train
1k1o	refined	Protein-Ligand	2	Ki=675nM	Ki	6.17	2001	bovine trypsin	IGN	P00760	C21H40N6O4	440.58	440.311	71	72	169.33	1.8	-1.06	2	4	12	OC(=O)C[NH2+][C@@H](C(=O)N1CCCC[C@H]1C(=O)NCCC[NH+]=C(N)N)CC1CCCCC1	0	C262H94N70O84S5+3	train
1k1p	general	Protein-Ligand	1.9	IC50=11.9nM	IC50	7.92	2001	bovine trypsin	MEL	P00760	C22H33N5O4	431.529	431.253	64	66	154.93	1.72	-1.01	2	4	10	OC(=O)C[NH2+][C@@H](C(=O)N1CC[C@H]1C(=O)NCc1ccc(cc1)C(=[NH2+])N)C1CCCCC1	0	C282H98N72O85S6+4	valid
1k1y	refined	Protein-Ligand	2.4	Ki=0.6mM	Ki	3.22	2003	4-alpha-glucanotransferase	ACR	O32462	C25H44NO18	646.613	646.256	88	91	325.75	-8.53	-9.59	14	13	22	OC[C@H]1O[C@H](O[C@@H]2[C@@H](CO)O[C@@H]([C@@H]([C@H]2O)O)O)[C@@H]([C@H]([C@@H]1O[C@H]1O[C@H](C)[C@H]([C@@H]([C@H]1O)O)[NH2+][C@H]1C=C(CO)[C@H]([C@@H]([C@H]1O)O)O)O)O	0	C405H129N100O106S2+7	train
1k21	refined	Protein-Ligand	1.86	Ki=4.2nM	Ki	8.38	2002	thrombin pro	IGN	P09945 P00734	C21H40N6O4	440.58	440.311	71	72	169.33	1.8	-1.06	2	4	12	OC(=O)C[NH2+][C@@H](C(=O)N1CCCC[C@H]1C(=O)NCCC[NH+]=C(N)N)CC1CCCCC1	0	C318H104N88O94S6+9	test
1k22	refined	Protein-Ligand	1.93	Ki=4nM	Ki	8.4	2002	thrombin pro	MEL	P09945 P00734	C22H33N5O4	431.529	431.253	64	66	154.93	1.72	-1.01	2	4	10	OC(=O)C[NH2+][C@@H](C(=O)N1CC[C@H]1C(=O)NCc1ccc(cc1)C(=[NH2+])N)C1CCCCC1	0	C327H106N88O94S6+7	train
1k27	refined	Protein-Ligand	1.95	Ki=1.0nM	Ki	9	2003	5'-deoxy-5'-methylthioadenosine phosphorylase	MTM	Q13126	C12H18N5O2S	296.369	296.118	38	40	149.96	-1.27	0.76	5	4	5	CSC[C@H]1[NH2+][C@H]([C@@H]([C@@H]1O)O)c1c[nH]c2c1ncnc2N	0	C328H120N89O95S8+7	valid
1k2i	general	Protein-Ligand	1.8	IC50=0.78mM	IC50	3.11	2001	chymotrypsinogen a	SN1	P00766	C9H8O3	164.158	164.047	20	20	57.53	1.1	1.31	2	3	4	O=C/C=C/c1ccc(cc1O)O	0	C224H80N55O71S6+	train
1k3t	general	Protein-Ligand	1.95	IC50=64uM	IC50	4.19	2002	glyceraldehyde 3-phosphate dehydrogenase	BRZ	P22513	C19H24O4	316.391	316.167	47	49	58.92	3.2	3.07	2	2	5	C=CC(C1=Cc2cc3C[C@H](Oc3cc2O[C@H]1O)C(O)(C)C)(C)C	0	C266H109N81O92S5+6	train
1k4g	refined	Protein-Ligand	1.7	Ki=1.4uM	Ki	5.85	2002	tRNA-guanine transglycosylase	AIQ	P28720	C12H12N6OS	288.328	288.079	32	34	151.77	-0.08	2.27	4	2	3	Nc1cc(CSc2ncc[nH]2)c2c(c1)c(=O)[nH]c(n2)N	0	C259H84N68O83S6+	train
1k4h	refined	Protein-Ligand	1.8	Ki=7.7uM	Ki	5.11	2002	tRNA-guanine transglycosylase	APQ	P28720	C12H16N4OS	264.347	264.104	34	35	123.09	0.78	2.89	3	1	4	CCCSCc1cc(N)cc2c1nc(N)[nH]c2=O	0	C286H93N73O90S7+	train
1k6c	refined	Protein-Ligand	2.2	Kd=33nM	Kd	7.48	2002	hiv-1 protease	MK1	P35963	C36H49N5O4	615.805	615.378	94	98	120.43	2.79	3.95	6	5	16	O[C@H](C[N@@H+]1CC[N@H+](C[C@H]1C(=O)NC(C)(C)C)Cc1cccnc1)C[C@H](C(=O)N[C@@H]1[C@H](O)Cc2c1cccc2)Cc1ccccc1	0	C349H114N94O101S2+6	train
1k6p	refined	Protein-Ligand	2.2	Kd=44nM	Kd	7.36	2002	hiv-1 protease	XN3	P35963	C38H50N4O6	658.827	658.373	98	103	126	3.67	4.29	6	4	16	O[C@@H](C[C@H](C(=O)N[C@@H]1[C@H](O)Cc2c1cccc2)Cc1ccccc1)C[N@@H+]1CC[N@H+](C[C@H]1C(=O)NC(C)(C)C)Cc1ccc2c(c1)OCO2	0	C333H107N90O98S2+6	valid
1k6t	refined	Protein-Ligand	2.25	Kd=24nM	Kd	7.62	2002	hiv-1 protease	XN1	P35963	C37H51N5O4	629.832	629.394	97	101	120.43	3.12	4.51	6	5	16	O[C@H](C[N@@H+]1CC[N@H+](C[C@H]1C(=O)NC(C)(C)C)Cc1cccnc1)C[C@@H]([C@@H](c1ccccc1)C)C(=O)N[C@@H]1[C@H](O)Cc2c1cccc2	0	C321H106N86O94S2+6	train
1k6v	refined	Protein-Ligand	2	Kd=120nM	Kd	6.92	2002	hiv-1 protease	XN2	P35963	C39H52N4O6	672.853	672.389	101	106	126	4	4.85	6	4	16	O[C@@H](C[C@@H]([C@@H](c1ccccc1)C)C(=O)N[C@@H]1[C@H](O)Cc2c1cccc2)C[N@@H+]1CC[N@H+](C[C@H]1C(=O)NC(C)(C)C)Cc1ccc2c(c1)OCO2	0	C294H101N78O93S+4	train
1k9q	general	Protein-Ligand	NMR	Kd=700uM	Kd	3.15	2001	65 kda yes-associated protein	5-mer	P46937	C34H53N6O6	641.821	641.403	99	102	169.96	3.29	1.71	4	6	21	CCCCCCCC[NH2+]CC(=O)N1CCC[C@H]1C(=O)N1CCC[C@H]1C(=O)N1CCC[C@H]1C(=O)N[C@H](C(=O)N)Cc1ccc(cc1)O	0	C121H37N30O37S	test
1k9r	general	Protein-Ligand	NMR	Kd=500uM	Kd	3.3	2001	65 kda yes-associated protein	6-mer	P46937	C32H45N5O8	627.728	627.327	90	93	176.66	2.88	1.62	3	8	16	CC(C[C@@H](C(=O)N1CCC[C@H]1C(=O)N1CCC[C@H]1C(=O)N[C@H](C(=O)O)Cc1ccc(cc1)O)NC(=O)[C@@H]1CCCN1C(=O)C)C	0	C140H41N38O41+3	train
1k9s	refined	Protein-Ligand	2	Ki=0.30uM	Ki	6.52	2001	purine nucleoside phosphorylase	FM2	P0ABP8	C11H16N5O4	282.276	282.12	36	38	141.39	-2.1	-1.9	5	5	5	OC[C@H]1O[C@H]([C@@H]([C@@H]1O)O)c1n[nH]c2c1nc[n+](c2N)C	0	C320H117N90O92S8+8	test
1kak	general	Protein-Ligand	2.5	IC50=26uM	IC50	4.59	2002	protein-tyrosine phosphatase, non-receptor type	FNP	P18031	C12H12F4O6P2	390.161	390.005	36	37	148.56	0.27	2.42	0	6	2	FC(P(O)(O)O)(c1ccc2c(c1)cc(cc2)C(P(O)(O)O)(F)F)F	0	C225H72N72O63S3+9	train
1kav	refined	Protein-Ligand	2.35	Ki=1.5uM	Ki	5.82	2002	tyrosine phosphatase 1b	FEP	P18031	C18H18F4O6P2	468.273	468.051	48	49	148.56	1.94	3.99	0	6	5	FC(P(O)(O)O)(c1ccc(cc1)/C=C/C=C/c1ccc(cc1)C(P(O)(O)O)(F)F)F	0	C215H70N69O62S2+9	train
1kc5	general	Protein-Ligand	2.5	Kd~0.1uM	Kd	7	2002	PS1 PEPTIDE	15-mer	Q91C35 P01869 P01837	C40H58N11O12	884.955	884.427	121	123	368.92	-1.9	-0.79	9	13	30	CC(C[C@@H](C(=O)N[C@H](C(=O)N1CCC[C@H]1C(=O)N[C@H](C(=O)N[C@H](C(=O)NCC(=O)O)Cc1ccccc1)C)CC(=O)O)NC(=O)[C@@H](NC(=O)[C@H](Cc1nc[nH]c1)[NH3+])CCC(=O)N)C	0	C262H78N59O84+2	train
1kc7	refined	Protein-Ligand	2.2	Ki=3uM	Ki	5.52	2002	pyruvate phosphate dikinase	PPR	P22983	C3H6O6P	169.05	168.99	16	15	128.65	-1.4	-1.62	0	6	1	OC(=O)C(=O)CP(O)(O)O	1	C199H81MgN57O61S6+5	train
1kcs	general	Protein-Ligand	2.5	Kd~0.1uM	Kd	7	2002	PS1 PEPTIDE	15-mer	P18532 Q91C35 P01837	C34H51N8O11	747.816	747.368	104	105	311.14	-1.41	-0.63	7	11	25	CC(C[C@@H](C(=O)N[C@H](C(=O)N1CCC[C@H]1C(=O)N[C@H](C(=O)N[C@H](C(=O)NCC(=O)O)Cc1ccccc1)C)CC(=O)O)NC(=O)[C@H](CCC(=O)N)[NH3+])C	0	C262H81N59O81+2	train
1kdk	refined	Protein-Ligand	1.7	Kd=0.9nM	Kd	9.05	2002	sex hormone-binding globulin	DHT	P04278	C19H30O2	290.44	290.225	51	54	37.3	3.77	3.96	1	2	1	O=C1CC[C@]2([C@H](C1)CC[C@@H]1[C@@H]2CC[C@]2([C@H]1CC[C@@H]2O)C)C	0	C350H104N86O91S3+7	valid
1kds	general	Protein-Ligand	2.15	Ki=1.7uM	Ki	5.77	2002	beta-lactamase	NPB	P00811	C6H6BNO4	166.927	167.039	18	18	86.28	0.66	-0.2	2	4	3	OB(c1cccc(c1)N(=O)=O)O	0	C183H63N50O62+3	train
1kdw	general	Protein-Ligand	2.28	Ki=2.9uM	Ki	5.54	2002	beta-lactamase	4CB	P00811	C7H7BO4	165.939	166.044	19	19	77.76	1.44	-0.94	2	4	3	OB(c1ccc(cc1)C(=O)O)O	0	C205H74N60O65+5	train
1ke0	general	Protein-Ligand	2.3	Ki=4.2uM	Ki	5.38	2002	beta-lactamase	CVB	P00811	C9H9BO4	191.976	192.059	23	23	77.76	2.08	-0.54	2	4	4	OC(=O)/C=C/c1ccc(cc1)B(O)O	0	C191H68N57O62+4	test
1ke3	general	Protein-Ligand	2.15	Ki=0.20uM	Ki	6.7	2002	beta-lactamase	BDB	P00811	C12H12B2O4	241.843	242.092	30	31	80.92	1.36	-1.29	4	4	7	OB(c1ccc(cc1)c1ccc(cc1)B(O)O)O	0	C201H67N57O68+4	train
1ke5	general	Protein-Ligand	2.2	IC50=560nM	IC50	6.25	2002	cell division protein kinase 2	LS1	P24941	C16H15N3O3S	329.374	329.083	38	40	95.68	1.56	3.68	3	3	4	CNS(=O)(=O)c1ccc(cc1)N/C=C/1\C(=O)Nc2c1cccc2	0	C299H82N72O73+9	train
1ke6	general	Protein-Ligand	2	IC50=5.7nM	IC50	8.24	2002	cell division protein kinase 2	LS2	P24941	C17H15N5O3S2	401.463	401.062	42	45	149.17	2.23	3.8	3	4	5	CNS(=O)(=O)Cc1ccc(cc1)N/N=C/1\C(=O)Nc2c1c1scnc1cc2	0	C312H89N75O78+9	valid
1ke7	general	Protein-Ligand	2	IC50=8.9nM	IC50	8.05	2002	cell division protein kinase 2	LS3	P24941	C20H15N3O4S	393.416	393.078	43	47	109.68	1.42	4.47	2	4	3	O=C1Nc2c(/C/1=C/Nc1ccc3c(c1)CS(=O)(=O)C3)cc(cc2)c1ocnc1	0	C309H88N74O77+9	test
1ke8	general	Protein-Ligand	2	IC50=1uM	IC50	6	2002	cell division protein kinase 2	LS4	P24941	C18H14N4O3S2	398.459	398.051	41	44	136.81	2.48	4.71	3	4	5	O=C1Nc2c(/C/1=C/Nc1ccc(cc1)S(=O)(=O)Nc1nccs1)cccc2	0	C309H83N74O75S+9	train
1ke9	general	Protein-Ligand	2	IC50=660nM	IC50	6.18	2002	cell division protein kinase 2	LS5	P24941	C16H16N5O3S	358.395	358.097	41	43	149.66	2.75	1.83	2	3	4	O=C1Nc2c(/C/1=C\Nc1ccc(cc1)S(=O)(=O)[NH+]=C(N)N)cccc2	0	C316H85N75O76S+9	test
1kel	refined	Protein-Ligand	1.9	Kd=52nM	Kd	7.28	1996	fab 28b4	AAH	P01868	C13H21N2O7P	348.289	348.109	44	44	161.84	-0.93	0.45	1	7	7	OC(=O)CCCC[N@@H+](CP(O)(O)O)Cc1ccc(cc1)N(=O)=O	0	C249H73N67O63S+5	train
1kf0	general	Protein-Ligand	2.5	Kd=2.80mM	Kd	2.55	2002	phosphoglycerate kinase	ACP	Q7SIB7	C11H21N5O12P3	508.232	508.04	52	54	320.15	-6.21	-2.25	3	12	9	O[C@@H]1[C@@H](COP(OP(CP(O)(O)O)(O)O)(O)O)O[C@H]([C@@H]1O)n1cnc2c1ncnc2N	1	C236H82MgN58O63S4+3	train
1kf6	general	Protein-Ligand	2.7	Ki=0.2uM	Ki	6.7	2002	E. coli Quinol-Fumarate Reductase	HQO	P00363 P0A8Q0 P0A8Q3 P0AC47	C16H20NO2	258.335	258.149	39	40	46.5	3.64	4.5	0	2	6	CCCCCCCC1=CC(=O)c2c([N]1=O)cccc2	0	C325H114N88O87S4+9	train
1kjr	refined	Protein-Ligand	1.55	Kd=0.88uM	Kd	6.06	2005	galectin-3	3-mer	P17931	C22H28F4N2O12	588.458	588.158	68	70	216.5	-2.71	-2.47	8	8	16	OC[C@H]1O[C@@H](O[C@@H]2[C@@H](CO)O[C@H]([C@@H]([C@H]2O)NC(=O)C)O)[C@@H]([C@H]([C@H]1O)NC(=O)c1c(F)c(F)c(c(c1F)F)OC)O	0	C190H66N65O55S+8	train
1kkq	general	Protein-Ligand	3	IC50=0.24uM	IC50	6.62	2002	peroxisome proliferator activated receptor	471	Q07869 Q9Y618	C35H36F3N3O4	619.673	619.266	81	84	93.46	7.89	7.89	2	3	15	CCC(=O)NC[C@H](Cc1ccc(cc1)OCCc1nc(oc1C)c1ccccc1)N/C(=C\C(=O)c1ccc(cc1)C(F)(F)F)/C	0	C408H137N93O101S8+6	train
1kl3	general	Protein-Ligand	1.7	Kd=1.37uM	Kd	5.86	2002	streptavidin	9-mer	P22629	C33H46N9O10	728.773	728.337	98	100	310.72	-3.95	-1.74	8	11	26	O=C[C@@H](NC(=O)[C@@H](NC(=O)[C@@H](NC(=O)[C@@H]1CCCN1C(=O)[C@@H](NC(=O)[C@H](CO)[NH3+])Cc1[nH]cnc1)CCC(=O)N)Cc1ccccc1)CCC(=O)O	0	C352H117N101O112+7	train
1kl5	general	Protein-Ligand	1.8	Kd=1.02uM	Kd	5.99	2002	streptavidin	9-mer	P22629	C28H39N8O7	599.659	599.294	82	84	244.32	-2.35	-1.48	7	8	21	O=C[C@@H](NC(=O)[C@@H](NC(=O)[C@@H]1CCCN1C(=O)[C@@H](NC(=O)[C@H](CO)[NH3+])Cc1[nH]cnc1)CCC(=O)N)Cc1ccccc1	0	C342H113N93O101+6	train
1km3	refined	Protein-Ligand	1.5	Ki=12.4uM	Ki	4.91	2002	Methanothermobacter thermautotrophicus ODCase mutant K42A	UP6	O26232	C8H13N3O9P	326.177	326.039	34	35	200.95	-4.05	-3.78	3	7	5	O[C@@H]1[C@H](O)[C@H](O[C@H]1n1ncc(=O)[nH]c1=O)COP(O)(O)O	0	C254H87N66O70S2+4	test
1kmv	general	Protein-Ligand	1.05	IC50=112nM	IC50	6.95	2002	dihydrofolate reductase	LII	P00374	C18H19N5O2	337.376	337.154	44	46	109.17	2.69	3.85	2	3	4	COc1ccc(cc1/C=C\c1cnc2c(c1C)c(N)nc(n2)N)OC	0	C373H101N97O87S3+12	train
1kmy	refined	Protein-Ligand	2	Kd=8uM	Kd	5.1	2002	2,3-dihydroxybiphenyl-1,2-dioxygenase	BPY	P47228	C12H10O2	186.207	186.068	24	25	40.46	2.84	2.76	2	2	3	Oc1c(O)cccc1c1ccccc1	1	C273H108FeN85O70S6+13	valid
1kna	general	Protein-Ligand	2.1	Kd=7uM	Kd	5.15	2002	heterochromatin protein 1	15-mer	P05205 P02299	C29H58N11O9	704.839	704.442	107	106	344.21	-3.23	-5.62	10	9	32	OC[C@H](NC(=O)[C@@H](NC(=O)[C@@H](NC(=O)[C@@H](NC(=O)[C@H]([C@H](O)C)NC(=O)[C@H](CCC(=O)N)[NH3+])C)CCC[NH+]=C(N)N)CCCC[NH+](C)C)C=O	0	C198H56N47O61S2+5	train
1kne	general	Protein-Ligand	2.4	Kd=2.5uM	Kd	5.6	2002	heterochromatin protein 1	15-mer	P05205 P02299	C30H60N11O9	718.866	718.458	110	109	339.77	-3.21	-4.06	9	9	32	OC[C@H](NC(=O)[C@@H](NC(=O)[C@@H](NC(=O)[C@@H](NC(=O)[C@H]([C@H](O)C)NC(=O)[C@H](CCC(=O)N)[NH3+])C)CCC[NH+]=C(N)N)CCCC[N+](C)(C)C)C=O	0	C188H51N43O61S+4	valid
1koj	refined	Protein-Ligand	1.9	Ki=0.2uM	Ki	6.7	2002	glucose-6-phosphate isomerase	PAN	Q9N1E2	C5H11NO9P	260.116	260.017	27	26	190.7	-4.28	-2.97	3	8	8	O=NC(=O)[C@H]([C@@H]([C@@H](COP(O)(O)O)O)O)O	0	C274H90N76O88S+5	test
1kpm	refined	Protein-Ligand	1.8	Ki=1.59uM	Ki	5.8	2002	phospholipase a2	VIT	P59071	C29H46O2	426.674	426.35	77	78	29.46	9.16	8.39	1	1	11	C[C@@H](CCC[C@@]1(C)CCc2c(O1)c(C)c(c(c2C)O)C)C/C=C/[C@@H](/C=C/CC(C)C)C	0	C245H73N60O70S8+6	train
1kqb	general	Protein-Ligand	1.8	Ki=0.1mM	Ki	4	2002	oxygen-insensitive nad(p)h nitroreductase	BEZ	Q01234	C7H6O2	122.121	122.037	15	15	37.3	2.53	1.38	0	2	0	OC(=O)c1ccccc1	0	C231H83N59O56+6	train
1kr3	general	Protein-Ligand	2.5	Ki=10uM	Ki	5	2003	beta-lactamase type ii	113	P25910	C15H14O8	322.267	322.069	37	39	126.43	2.12	1.51	2	5	3	CO[C@@H]1O[C@@H](C)Cc2c1c(=O)c1c(o2)cc(c(c1C(=O)O)O)O	1	C195H73N58O59S4Zn2+4	valid
1ksn	refined	Protein-Ligand	2.1	Ki=0.4nM	Ki	9.4	2002	coagulation factor xa	FXV	P00742	C25H27N4O4	447.506	447.203	60	62	132.47	3.8	2.49	1	3	10	COC(=O)[C@@H]([C@H](NC(=O)c1ccc(cc1)c1cc[n+](cc1)[O-])C)Cc1cccc(c1)C(=[NH2+])N	0	C282H102N76O89S5+7	train
1kti	general	Protein-Ligand	1.97	Ki=370uM	Ki	3.43	2002	glycogen phosphorylase	AZC	P00489	C9H16N2O7	264.233	264.096	34	34	148.35	-2.43	-2.59	6	6	9	OC[C@H]1O[C@@H](NC(=O)NC(=O)C)[C@@H]([C@H]([C@@H]1O)O)O	0	C320H112N95O102S2+8	train
1ktt	general	Protein-Ligand	2.1	IC50=1.5uM	IC50	5.82	2002	thrombin	C02	P28506 P00734	C22H22N5O2S	420.507	420.149	52	55	123.98	4.71	3.28	1	3	6	Cn1c(Cc2ccc(cc2)C(=[NH2+])N)nc2c1ccc(c2)NS(=O)(=O)c1ccccc1	0	C318H105N86O93S6+7	train
1kug	refined	Protein-Ligand	1.37	Ki=0.160mM	Ki	3.8	2002	metalloproteinase	3-mer	O57413	C20H23N5O6	429.427	429.165	54	56	183.48	-0.19	0.73	5	6	10	NC(=O)C[C@@H](C(=O)N[C@H](C(=O)O)Cc1c[nH]c2c1cccc2)NC(=O)[C@@H]1CCC(=O)N1	1	C247H84Cd2N68O68S5+7	train
1kui	refined	Protein-Ligand	1.5	Ki=0.169mM	Ki	3.77	2002	metalloproteinase	3-mer	O57413	C21H25N5O6	443.453	443.18	57	59	183.48	0.17	1.12	5	6	11	NC(=O)CC[C@@H](C(=O)N[C@H](C(=O)O)Cc1c[nH]c2c1cccc2)NC(=O)[C@@H]1CCC(=O)N1	1	C256H87Cd2N70O73S5+7	train
1kuk	refined	Protein-Ligand	1.45	Ki=0.124mM	Ki	3.91	2002	metalloproteinase	3-mer	O57413	C22H30N5O5	444.504	444.225	62	64	168.03	-1.19	0.57	5	5	12	[NH3+]CCCC[C@@H](C(=O)N[C@H](C(=O)O)Cc1c[nH]c2c1cccc2)NC(=O)[C@@H]1CCC(=O)N1	1	C220H76Cd2N62O62S4+5	valid
1kv1	refined	Protein-Ligand	2.5	Kd=1.16uM	Kd	5.94	2002	mitogen-activated protein kinase p38	BMU	Q16539	C15H19ClN4O	306.791	306.125	40	41	58.95	3.46	4.16	2	2	5	O=C(Nc1cc(nn1C)C(C)(C)C)Nc1ccc(cc1)Cl	0	C388H115N102O94S3+11	train
1kv2	general	Protein-Ligand	2.8	Kd=0.1nM	Kd	10	2002	p38 map kinase	B96	Q16539	C31H38N5O3	528.665	528.297	77	81	81.85	5.74	6.28	3	2	10	O=C(Nc1cc(nn1c1ccc(cc1)C)C(C)(C)C)Nc1ccc(c2c1cccc2)OCC[NH+]1CCOCC1	0	C447H130N119O113S3+12	train
1kv5	refined	Protein-Ligand	1.65	Ki=60uM	Ki	4.22	2002	triosephosphate isomerase	PGA	P04789	C2H6O6P	157.039	156.99	15	14	120.81	-1.24	-1.26	0	5	1	OC(=O)COP(O)(O)O	0	C225H78N57O64S+3	train
1kvo	general	Protein-Ligand	2	IC50=0.013uM	IC50	7.89	1997	phospholipase a2	OAP	P14555	C31H37NO3S	503.695	503.249	73	75	91.7	8.9	7.3	1	3	16	O=C(N[C@H](CSc1ccc(cc1)Cc1ccccc1)CCC(=O)O)CCCCCCc1ccccc1	1	C316H101Ca2N83O85S9+11	test
1kwq	general	Protein-Ligand	2.6	IC50=0.62nM	IC50	9.21	2003	carbonic anhydrase ii	SG1	P00918	C10H11N3O5S	285.276	285.042	30	31	134.67	-0.26	2.74	1	5	2	O=C1CCCN1c1ccc(cc1N(=O)=O)S(=O)(=O)N	1	C289H93N76O66SZn+5	train
1kwr	general	Protein-Ligand	2.25	IC50=0.25uM	IC50	6.6	2003	carbonic anhydrase ii	SG2	P00918	C8H8N2O3S2	244.291	243.998	23	24	118.78	0.57	2.03	1	3	1	O=c1sn(c2c1cc(cc2)S(=O)(=O)N)C	1	C322H100N81O70S2Zn+6	train
1kyv	refined	Protein-Ligand	2.4	Kd=1.2uM	Kd	5.92	2002	6,7-dimethyl-8-ribityllumazine synthase	RBF	Q9UUB1	C17H20N4O6	376.364	376.138	47	49	161.56	-1.3	-1.68	5	6	9	OC[C@H]([C@H]([C@H](Cn1c2cc(C)c(cc2nc2c1nc(=O)[nH]c2=O)C)O)O)O	0	C332H106N89O85S3+5	train
1kz8	general	Protein-Ligand	2	IC50=0.83uM	IC50	6.08	2002	fructose-1,6-bisphosphatase	PFE	P00636	C22H22N4O3S	422.5	422.141	52	55	117.63	3.93	4.86	2	4	9	CCOc1cc2c(ncnc2cc1OCC)Nc1cccc(c1)c1csc(n1)CO	0	C300H108N78O78S+11	train
1kzk	refined	Protein-Ligand	1.09	Ki=41pM	Ki	10.39	2002	retropepsin	JE2	P03369	C32H37N3O5S	575.718	575.245	78	81	144.27	4.49	4.43	4	5	14	O[C@H](C(=O)N1CSC([C@H]1C(=O)NCc1ccccc1C)(C)C)[C@@H](NC(=O)c1cccc(c1C)O)Cc1ccccc1	0	C348H111N92O97S2+6	train
1kzn	refined	Protein-Ligand	2.3	Kd=1.2nM	Kd	8.92	2002	DNA gyrase b	CBN	P0AES6	C35H37ClN2O11	697.128	696.209	86	90	189.78	5.33	5.44	5	6	14	CO[C@@H]1[C@@H](OC(=O)c2ccc([nH]2)C)[C@@H](O)[C@@H](OC1(C)C)Oc1ccc2c(c1Cl)oc(=O)c(c2O)NC(=O)c1ccc(c(c1)CC=C(C)C)O	0	C209H87N61O67S2+6	test
1l2s	general	Protein-Ligand	1.94	Ki=26uM	Ki	4.59	2002	beta-lactamase	STC	P00811	C11H8ClNO4S2	317.769	316.958	27	28	120.09	3.4	4.05	1	4	3	Clc1ccc(cc1)NS(=O)(=O)c1ccsc1C(=O)O	0	C213H69N58O70+4	valid
1l2z	general	Protein-Ligand	NMR	Kd=203uM	Kd	3.69	2002	cd2 antigen (cytoplasmic tail)-binding protein	11-mer	O95400 P06729	C54H88N21O13	1239.41	1238.69	176	181	530.39	-2.58	-6.07	10	15	41	OC[C@@H](C(=O)N[C@H](C(=O)N[C@H](C(=O)N1CCC[C@H]1C(=O)N1CCC[C@H]1C(=O)N1CCC[C@H]1C(=O)N1CCC[C@H]1C(=O)NCC(=O)N[C@H](C(=O)N[C@H](C(=O)N[C@H](C(=O)O)C(C)C)CCC[NH+]=C(N)N)Cc1c[nH]cn1)CCC[NH+]=C(N)N)Cc1c[nH]cn1)[NH3+]	0	C129H34N26O38+	test
1l5q	general	Protein-Ligand	2.25	Kd=108uM	Kd	3.97	2002	glycogen phosphorylase	CFF	P06737	C8H10N4O2	194.191	194.08	24	25	61.82	-0.43	-1.03	0	3	0	Cn1cnc2c1c(=O)n(C)c(=O)n2C	0	C183H55N50O47S2+5	valid
1l5r	general	Protein-Ligand	2.1	Kd=17uM	Kd	4.77	2002	glycogen phosphorylase	RBF	P06737	C17H21N4O6	377.372	377.146	48	50	163.41	-1.35	-2.26	6	7	9	OC[C@H]([C@H]([C@H](C[n+]1c2cc(C)c(cc2nc2c1[nH]c(=O)[nH]c2=O)C)O)O)O	0	C251H78N67O68S2+7	train
1l5s	general	Protein-Ligand	2.1	Kd=550uM	Kd	3.26	2002	glycogen phosphorylase	URC	P06737	C5H4N4O3	168.11	168.028	16	17	114.37	-1.91	-1.77	4	3	0	O=c1[nH]c2c([nH]1)[nH]c(=O)[nH]c2=O	0	C182H51N47O46S+4	train
1l6s	general	Protein-Ligand	1.7	IC50=39uM	IC50	4.41	2002	porphobilinogen synthase	DSB	P0ACB2	C10H18O4	202.248	202.121	32	31	74.6	4.99	2.28	0	4	7	OC(=O)CCCCCCCCC(=O)O	1	C312H98N72O86S6Zn+4	valid
1l6y	general	Protein-Ligand	1.9	IC50=0.22mM	IC50	3.66	2002	porphobilinogen synthase	4OX	P0ACB2	C10H18O4	202.248	202.121	32	31	74.6	4.99	2.28	0	4	7	OC(=O)CCCCCCCCC(=O)O	1	C299H97N75O82S5Zn+8	valid
1l7x	general	Protein-Ligand	2.3	Kd=92uM	Kd	4.04	2002	glycogen phosphorylase	CFF	P06737	C8H10N4O2	194.191	194.08	24	25	61.82	-0.43	-1.03	0	3	0	Cn1cnc2c1c(=O)n(C)c(=O)n2C	0	C193H57N50O48S2+5	test
1l83	refined	Protein-Ligand	1.7	Kd=0.40mM	Kd	3.4	1993	lysozyme C54T C97A L99A	BNZ	P00720	C6H6	78.112	78.047	12	12	0	1.92	1.69	0	0	0	c1ccccc1	0	C230H76N59O53S3+5	train
1l8g	refined	Protein-Ligand	2.5	Ki=0.6uM	Ki	6.22	2002	human protein-tyrosine phosphatases 1B, PTP-1B	DBD	P18031	C18H14N2O9S2	466.442	466.014	45	48	205.28	3.47	1.84	1	7	5	OC(=O)C(=O)Nc1sc2c(c1C(=O)O)CCO[C@H]2COC1=NS(=O)(=O)c2c1cccc2	0	C242H85N81O72S4+10	train
1laf	refined	Protein-Ligand	2.06	Kd=14nM	Kd	7.85	1995	diga16	ARG	P02911	C6H16N4O2	176.217	176.127	28	27	130.95	-1.21	-2.78	1	2	4	OC(=O)[C@H](CCC[NH+]=C(N)N)[NH3+]	0	C308H109N75O108+2	train
1lag	refined	Protein-Ligand	2.06	Kd=500nM	Kd	6.3	1995	diga16	HIS	P02911	C6H10N3O2	156.162	156.077	21	21	93.62	-2.35	-1.35	2	3	2	OC(=O)[C@@H]([NH3+])Cc1c[nH]cn1	0	C275H102N69O97+2	train
1lah	refined	Protein-Ligand	2.06	Kd=30nM	Kd	7.52	1995	diga16	ORN	P02911	C5H14N2O2	134.177	134.106	23	22	92.58	-2.71	-2.3	2	2	3	OC(=O)[C@@H]([NH3+])CCC[NH3+]	0	C265H101N64O93+	train
1lan	refined	Protein-Ligand	1.9	Ki=60nM	Ki	7.22	1995	leucine aminopeptidase	LEU	P00727	C6H14NO2	132.181	132.102	23	22	64.94	-0.79	-0.27	1	2	2	[NH3+][C@H](C(=O)O)CC(C)C	1	C185H79N53O62S7Zn2+3	train
1lbf	refined	Protein-Ligand	2.05	Kd=0.014uM	Kd	7.85	2002	indole-3-glycerol phosphate synthase	137	Q06121	C12H19NO9P	352.254	352.08	42	42	193.53	-0.73	-1.38	4	8	10	O[C@@H]([C@@H]([C@@H](COP(O)(O)O)O)O)CNc1ccccc1C(=O)O	0	C342H122N79O97S+7	train
1lbk	refined	Protein-Ligand	1.86	Kd=668uM	Kd	3.18	2002	glutathione s-transferase class pi	GSH	P08263 P09211	C10H18N3O6S	308.331	308.092	38	37	199.24	-2.73	-2.14	3	6	10	SC[C@@H](C(=O)NCC(=O)O)NC(=O)CC[C@@H](C(=O)O)[NH3+]	0	C308H110N90O91S5+9	test
1lcj	general	Protein-Ligand	1.8	Kd=1nM	Kd	9	1995	P56 LCK Tyrosine kinase	11-mer	P03079 P06239	C66H97N12O21	1394.54	1393.69	196	199	533.81	4.02	2.14	12	21	49	CC[C@@H]([C@@H](C(=O)N1CCC[C@H]1C(=O)N[C@H](C(=O)N[C@H](C(=O)N[C@H](C(=O)O)CC(C)C)Cc1ccc(cc1)O)[C@H](CC)C)NC(=O)[C@@H](NC(=O)[C@@H](NC(=O)[C@@H](NC(=O)[C@@H](NC(=O)[C@@H]1CCCN1C(=O)[C@H](CCC(=O)O)[NH3+])CCC(=O)N)Cc1ccc(cc1)O)CCC(=O)O)CCC(=O)O)C	0	C195H70N55O54S+7	train
1lcp	refined	Protein-Ligand	1.65	Ki=0.23uM	Ki	6.64	1995	leucine aminopeptidase	PLU	P00727	C5H16NO3P	169.159	169.087	26	25	101.92	-3.13	-0.66	1	3	2	[NH3+][C@H](P(O)(O)O)CC(C)C	1	C210H89N62O71S5Zn2+3	valid
1ld7	general	Protein-Ligand	2	IC50=1.1nM	IC50	8.96	2002	farnesyltransferase alpha subunit	U66	P49354 P49356	C27H24N5O2	450.512	450.193	58	63	87.76	3.3	4.61	1	3	0	N#Cc1ccc2cc1Oc1ccc3c(c1)c(ccc3)N1CC[C@@H](C1=O)[NH2+]CCc1n(C2)cnc1	1	C363H118N94O93S6Zn+6	train
1ld8	general	Protein-Ligand	1.8	IC50=3.5nM	IC50	8.46	2002	farnesyltransferase alpha subunit	U49	P49354 P49356	C26H22N5O2	436.485	436.177	55	60	87.76	2.84	4.57	1	3	0	N#Cc1ccc2cc1Oc1ccc3c(c1)c(ccc3)N1CC[C@@H]([NH2+]Cc3n(C2)cnc3)C1=O	1	C322H108N80O87S5Zn+4	test
1lee	refined	Protein-Ligand	1.9	Ki=18nM	Ki	7.74	2002	plasmepsin ii	R36	P46925	C32H41N3O4	531.686	531.31	80	82	113.68	5.78	5.95	4	3	16	CC(C[C@H](NC(=O)c1cccc(c1)N)C[C@@H]([C@H](Cc1ccccc1)NC(=O)COc1c(C)cccc1C)O)C	0	C401H128N85O108S4+	train
1leg	general	Protein-Ligand	1.75	Kd=11.1nM	Kd	7.95	2002	h-2 class i histocompatibility antigen, k-b	8-mer	Q62425 P01901 P01887	C51H72N10O15	1065.18	1064.52	148	150	437.36	-2.66	-0.16	13	15	41	[NH3+]CCCC[C@@H](C(=O)N[C@H](C(=O)N[C@H](C(=O)N[C@H](C(=O)N[C@H](C(=O)O)C(C)C)CO)Cc1ccc(cc1)O)Cc1ccccc1)NC(=O)[C@@H](NC(=O)[C@@H](NC(=O)[C@H](CCC(=O)O)[NH3+])CCC(=O)N)Cc1ccc(cc1)O	0	C459H130N114O119S2+10	train
1lek	general	Protein-Ligand	2.15	Kd=1.3nM	Kd	8.89	2002	h-2 class i histocompatibility antigen, k-b	8-mer	Q62425 P01901 P01887	C51H72N10O15	1065.18	1064.52	148	150	437.36	-2.66	-0.16	13	15	41	[NH3+]CCCC[C@@H](C(=O)N[C@H](C(=O)N[C@H](C(=O)N[C@H](C(=O)N[C@H](C(=O)O)C(C)C)CO)Cc1ccc(cc1)O)Cc1ccccc1)NC(=O)[C@@H](NC(=O)[C@@H](NC(=O)[C@H](CCC(=O)O)[NH3+])CCC(=O)N)Cc1ccc(cc1)O	0	C452H130N110O117S2+10	test
1lev	general	Protein-Ligand	2.15	IC50=2.5uM	IC50	5.6	2002	fructose-1,6-bisphosphatase	CLI	P00636	C12H9Cl2NO4	302.11	300.991	28	29	90.39	5.15	3.19	1	4	2	OC(=O)CCc1c([nH]c2c1c(Cl)cc(c2)Cl)C(=O)O	0	C182H59N52O50S3+6	train
1lf2	refined	Protein-Ligand	1.8	Ki=30nM	Ki	7.52	2002	plasmepsin ii	R37	P46925	C32H41N3O4	531.686	531.31	80	82	113.68	5.78	5.95	4	3	16	CC(C[C@H](NC(=O)c1ccc(cc1)N)C[C@@H]([C@H](Cc1ccccc1)NC(=O)COc1c(C)cccc1C)O)C	0	C415H127N87O113S3+	train
1lf3	general	Protein-Ligand	2.7	Ki=100nM	Ki	7	2002	plasmepsin 2	EH5	P46925	C46H45N3O10	799.864	799.31	104	110	153.17	5.88	5.8	2	5	21	COc1cc(cc(c1OCc1ccccc1)OC)C(=O)N[C@H]([C@H](CN(C(=O)CCN1C(=O)c2c(C1=O)cccc2)CCc1ccc2c(c1)OCO2)O)Cc1ccccc1	0	C391H119N84O110S3	train
1lf8	general	Protein-Ligand	2.3	Kd=3.5uM	Kd	5.46	2002	adp-ribosylation factor binding protein gga3	12-mer	Q9NZ52 P11717	C40H67N10O19P	1022.99	1022.43	137	137	492.73	-0.39	-1.6	9	19	35	CC[C@@H]([C@@H](C(=O)O)NC(=O)[C@@H](NC(=O)[C@@H](NC(=O)[C@@H](NC(=O)[C@@H](NC(=O)[C@@H](NC(=O)[C@@H](NC(=O)[C@H](COP(O)(O)O)[NH3+])CC(=O)O)CCC(=O)O)CC(=O)O)CC(C)C)CC(C)C)Cc1[nH]cnc1)C	0	C189H57N53O46S+8	train
1lf9	general	Protein-Ligand	2.2	Ki=1pM	Ki	12	2003	glucoamylase	ACR	O85672	C25H44NO18	646.613	646.256	88	91	325.75	-8.53	-9.59	14	13	22	OC[C@H]1O[C@H](O[C@@H]2[C@@H](CO)O[C@@H]([C@@H]([C@H]2O)O)O)[C@@H]([C@H]([C@@H]1O[C@H]1O[C@H](C)[C@H]([C@@H]([C@H]1O)O)[NH2+][C@H]1C=C(CO)[C@H]([C@@H]([C@H]1O)O)O)O)O	0	C350H110N96O100+7	test
1lfo	general	Protein-Ligand	2.3	Kd~0.2uM	Kd	6.7	1997	fatty acid binding protein	OLA	P02692	C18H34O2	282.461	282.256	54	53	37.3	8.71	6.11	0	2	14	CCCCCCCC/C=C\CCCCCCCC(=O)O	0	C286H104N70O83S4+6	train
1lgt	refined	Protein-Ligand	1.7	Kd=0.8uM	Kd	6.1	2002	biphenyl-2,3-diol 1,2-dioxygenase	BP3	P47228	C12H9ClO2	220.652	220.029	24	25	40.46	3.47	3.42	2	2	3	Clc1ccccc1c1cccc(c1O)O	1	C273H106FeN83O71S6+11	train
1lgw	refined	Protein-Ligand	1.85	Kd=100uM	Kd	4	2002	lysozyme	1AN	P00720	C6H6FN	111.117	111.048	14	14	26.02	1.34	1.99	1	0	0	Nc1ccccc1F	0	C244H73N67O58S3+6	train
1lhc	general	Protein-Ligand	1.95	Ki=0.04nM	Ki	10.4	1996	thrombin alpha	DP7	P00734	C21H34BN6O5	461.343	461.268	67	68	184.98	1.21	-1.1	4	5	16	CC(=O)N[C@@H](C(=O)N1CCC[C@H]1C(=O)N[C@H](B(O)O)CCC[NH+]=C(N)N)Cc1ccccc1	0	C295H93N78O86S5+7	valid
1lhd	general	Protein-Ligand	2.35	Ki=0.24nM	Ki	9.62	1996	thrombin alpha	DI2	P00734	C21H34BN4O5	433.329	433.262	65	66	146.61	0.06	-0.23	5	5	16	[NH3+]CCCC[C@@H](B(O)O)NC(=O)[C@@H]1CCCN1C(=O)[C@@H](Cc1ccccc1)NC(=O)C	0	C305H100N84O90S6+7	valid
1lhe	general	Protein-Ligand	2.25	Ki=0.29nM	Ki	9.54	1996	thrombin alpha	DI3	P00734	C22H35BN5O5	460.355	460.273	68	69	170.58	2.12	-0.26	4	5	17	CC(=O)N[C@@H](C(=O)N1CCC[C@H]1C(=O)N[C@H](B(O)O)CCCCC(=[NH2+])N)Cc1ccccc1	0	C328H106N90O99S6+7	test
1lhf	general	Protein-Ligand	2.4	Ki=8.1nM	Ki	8.09	1996	thrombin alpha	DI4	P00734	C22H36BN4O5	447.356	447.278	68	69	146.61	0.42	0.16	5	5	17	[NH3+]CCCCC[C@@H](B(O)O)NC(=O)[C@@H]1CCCN1C(=O)[C@@H](Cc1ccccc1)NC(=O)C	0	C317H103N85O94S6+7	test
1lhg	general	Protein-Ligand	2.25	Ki=79nM	Ki	7.1	1996	thrombin alpha	DI5	P00734	C20H32BN4O5	419.303	419.247	62	63	146.61	-0.29	-0.62	5	5	15	[NH3+]CCC[C@@H](B(O)O)NC(=O)[C@@H]1CCCN1C(=O)[C@@H](Cc1ccccc1)NC(=O)C	0	C308H97N84O90S5+7	train
1lhu	refined	Protein-Ligand	1.8	Kd=1.48nM	Kd	8.83	2002	N-terminal laminin G-like domain of human sex hormone-binding globulin	EST	P04278	C18H24O2	272.382	272.178	44	47	40.46	3.9	3.61	2	2	2	Oc1ccc2c(c1)CC[C@@H]1[C@@H]2CC[C@]2([C@H]1CC[C@@H]2O)C	0	C322H106N76O86S4+6	test
1lhv	general	Protein-Ligand	2	Kd=1.23nM	Kd	8.91	2002	N-terminal laminin G-like domain of human sex hormone-binding globulin	NOG	P04278	C21H28O2	312.446	312.209	51	54	37.3	3.04	3.88	1	2	3	C#C[C@]1(O)CC[C@@H]2[C@]1(CC)CC[C@H]1[C@H]2CCC2=CC(=O)CC[C@H]12	1	C343H100N82O91S3Zn+7	valid
1lhw	general	Protein-Ligand	1.75	Kd=0.832nM	Kd	9.08	2002	N-terminal laminin G-like domain of human sex hormone-binding globulin	ESM	P04278	C19H26O3	302.408	302.188	48	51	49.69	3.88	3.62	2	2	3	COc1cc2c(cc1O)CC[C@@H]1[C@@H]2CC[C@]2([C@H]1CC[C@@H]2O)C	0	C330H100N84O88S4+9	train
1li2	refined	Protein-Ligand	2	Kd=91uM	Kd	4.04	2002	lysozyme	IPH	P00720	C6H6O	94.111	94.042	13	13	20.23	1.57	1.39	1	1	1	Oc1ccccc1	0	C236H78N61O55S2+5	train
1li3	refined	Protein-Ligand	1.85	Kd=56uM	Kd	4.25	2002	lysozyme	3CH	P00720	C6H5ClO	128.556	128.003	13	13	20.23	2.19	2.05	1	1	1	Oc1cccc(c1)Cl	0	C239H75N63O58S2+5	train
1li6	refined	Protein-Ligand	2	Kd=0.16mM	Kd	3.8	2002	lysozyme mutant l99a/m102q	5MP	P00720	C5H7N	81.116	81.058	13	13	15.79	1.08	1.32	1	0	0	Cc1c[nH]cc1	0	C237H75N63O58S2+5	valid
1ljt	general	Protein-Ligand	2	IC50=7uM	IC50	5.15	2002	macrophage migration inhibitory factor	HDI	P14174	C12H13NO4	235.236	235.084	30	31	68.12	1.32	0.88	1	2	5	COC(=O)C[C@@H]1ON=C(C1)c1ccc(cc1)O	0	C232H68N52O60S3+4	test
1lke	refined	Protein-Ligand	1.9	Kd=30.2nM	Kd	7.52	2003	diga16	DOG	P09464	C23H34O5	390.513	390.241	62	66	86.99	2	2.58	3	4	4	O[C@H]1CC[C@]2([C@@H](C1)CC[C@@H]1[C@@H]2C[C@@H](O)[C@]2([C@]1(O)CC[C@@H]2C1=CC(=O)OC1)C)C	0	C324H95N74O88S2+4	test
1lkk	refined	Protein-Ligand	1	Kd=140nM	Kd	6.85	1996	tyrosine kinase p56	4-mer	P06239	C27H40N4O14P	675.599	675.228	86	86	311.81	2.61	0.65	4	13	20	CC[C@@H]([C@@H](C(=O)O)NC(=O)[C@@H](NC(=O)[C@@H](NC(=O)[C@H](Cc1ccc(cc1)OP(O)(O)O)NC(=O)C)CCC(=O)O)CCC(=O)O)C	0	C217H75N62O70S+7	test
1lkl	refined	Protein-Ligand	1.8	Kd=1540nM	Kd	5.81	1996	tyrosine kinase p56	4-mer	P06239	C23H32N4O14P	619.492	619.165	74	74	311.81	0.89	-0.77	4	13	18	CC(=O)N[C@H](C(=O)N[C@H](C(=O)N[C@H](C(=O)NCC(=O)O)CCC(=O)O)CCC(=O)O)Cc1ccc(cc1)OP(O)(O)O	0	C214H75N62O69S+7	train
1lkx	general	Protein-Ligand	3	Kd=7.1uM	Kd	5.15	2002	myosin ie heavy chain	ADP	Q03479	C10H17N5O10P2	429.217	429.045	44	46	266.1	-4.89	-2.04	3	10	7	O[C@@H]1[C@@H](COP(OP(O)(O)O)(O)O)O[C@H]([C@@H]1O)n1cnc2c1ncnc2N	1	C315H107MgN88O97S2+9	test
1ll4	general	Protein-Ligand	2.8	Ki=60nM	Ki	7.22	2002	chitinase 1	3-mer	P0CB51	C25H43N4O14	623.627	623.278	86	89	263.17	-6.52	-5.62	9	9	18	OC[C@H]1O[C@@H](O[C@@H]2[C@@H](CO)[C@H]3[C@@H]([C@H]2O)[NH+]=C(O3)N(C)C)[C@@H]([C@@H]([C@@H]1O[C@@H]1O[C@H](CO)[C@H]([C@H]([C@H]1NC(=O)C)O)O)O)NC(=O)C	0	C397H106N86O103S4+2	train
1llb	general	Protein-Ligand	1.72	IC50=900nM	IC50	6.05	2002	beta-lactamase	PCN	P00811	C14H20N5O5S2	402.469	402.091	46	47	214.12	-0.75	1.17	3	5	7	O=C[C@H]([C@@H]1[NH2+][C@H](C(S1)(C)C)C(=O)O)NC(=O)/C(=N\OC)/c1csc(n1)N	0	C280H93N80O88+7	test
1lnm	refined	Protein-Ligand	1.9	Kd=2.0nM	Kd	8.7	2003	diga16	DTX	P09464	C23H34O4	374.514	374.246	61	65	66.76	3.16	3.6	2	3	3	O[C@H]1CC[C@]2([C@@H](C1)CC[C@@H]1[C@@H]2CC[C@]2([C@]1(O)CC[C@@H]2C1=CC(=O)OC1)C)C	0	C309H94N72O85S2+4	valid
1lol	general	Protein-Ligand	1.9	Ki=0.41uM	Ki	6.39	2002	orotidine 5'-monophosphate decarboxylase	XMP	O26232	C10H14N4O9P	365.213	365.05	38	40	216.74	-4.22	-3.3	4	8	5	O=c1[nH]c(=O)c2c([nH]1)n(cn2)[C@@H]1O[C@@H]([C@H]([C@H]1O)O)COP(O)(O)O	0	C249H87N59O69S2+4	train
1loq	refined	Protein-Ligand	1.5	Ki=0.2mM	Ki	3.7	2002	orotidine 5'-monophosphate decarboxylase	U	O26232	C9H14N2O9P	325.189	325.044	35	36	188.06	-4.11	-3.17	3	7	5	O[C@@H]1[C@H](O)[C@H](O[C@H]1n1ccc(=O)[nH]c1=O)COP(O)(O)O	0	C261H93N67O69S2+5	train
1lor	general	Protein-Ligand	1.6	Ki=8.8pM	Ki	11.06	2002	orotidine 5'-monophosphate decarboxylase	BMP	O26232	C9H14N2O10P	341.189	341.039	36	37	208.29	-4.26	-3.47	4	8	6	O[C@@H]1[C@H](O)[C@H](O[C@H]1n1c(O)cc(=O)[nH]c1=O)COP(O)(O)O	0	C327H107N82O89S2+5	test
1los	general	Protein-Ligand	1.9	Ki=64nM	Ki	7.19	2002	orotidine 5'-monophosphate decarboxylase	UP6	O26232	C8H13N3O9P	326.177	326.039	34	35	200.95	-4.05	-3.78	3	7	5	O[C@@H]1[C@H](O)[C@H](O[C@H]1n1ncc(=O)[nH]c1=O)COP(O)(O)O	0	C280H100N68O78S3+4	train
1lox	general	Protein-Ligand	2.4	Ki=3uM	Ki	5.52	1998	lipoxygenase-15	RS7	P12530	C17H20O2	256.339	256.146	39	39	37.3	6.53	4.11	0	2	6	CCCCCCC#Cc1ccccc1/C=C/C(=O)O	1	C377H115FeN102O95S3+7	valid
1lpg	refined	Protein-Ligand	2	Ki=82nM	Ki	7.09	2003	coagulation factor xa	IMA	P00742	C34H37N5O2	547.69	547.295	78	82	94.87	6.87	4.95	1	1	11	O=C(c1cc2c(n1Cc1cccc(c1)C(=[NH2+])N)ccc(c2)OCc1ccccc1)NCc1ccc(cc1)[N+](C)(C)C	0	C289H102N81O91S5+8	train
1lpk	refined	Protein-Ligand	2.2	Ki=28nM	Ki	7.55	2003	coagulation factor xa	CBB	P00742	C25H25N5O2	427.498	427.201	57	60	134.45	6.85	1.38	0	1	8	NC(=[NH2+])c1cccc(c1)COC(=O)c1cc2c(n1Cc1cccc(c1)C(=[NH2+])N)cccc2	0	C299H105N77O93S6+6	train
1lpz	refined	Protein-Ligand	2.4	Ki=25nM	Ki	7.6	2003	coagulation factor xa	CMB	P00742	C25H23Cl2N4O	466.382	465.125	55	58	85.64	7.11	4.79	1	1	7	Clc1cc(CNC(=O)c2cc3c(n2Cc2cccc(c2)C(=[NH2+])N)cccc3C)cc(c1)Cl	0	C275H102N75O88S5+7	test
1lq2	general	Protein-Ligand	2.7	Ki=1.7nM	Ki	8.77	2003	beta-d-glucan glucohydrolase isoenzyme exo1	IDD	Q9XEI3	C14H16N2O4	276.288	276.111	36	38	98.74	-0.77	-0.15	4	5	6	OC[C@@H]1[C@@H](O)[C@H](O)[C@H](c2n1cc(n2)c1ccccc1)O	0	C259H110N74O82S4+6	train
1lqd	general	Protein-Ligand	2.7	Ki=9nM	Ki	8.05	2003	coagulation factor xa	CMI	P00742	C27H29N4O	425.545	425.234	61	64	85.64	6.58	4.1	1	1	7	Cc1cc(CNC(=O)c2cc3c(n2Cc2cccc(c2)C(=[NH2+])N)cccc3C)cc(c1)C	0	C276H95N77O83S5+8	valid
1lqe	general	Protein-Ligand	2.2	Ki=1507nM	Ki	5.82	2003	trypsin	IMA	P00760	C27H31N5O	441.568	441.253	64	67	85.64	5.4	3.37	1	1	8	O=C(c1cc2c(n1Cc1cccc(c1)C(=[NH2+])N)cccc2)NCc1ccc(cc1)[N+](C)(C)C	0	C253H87N69O84S5+4	valid
1lqf	general	Protein-Ligand	2.5	IC50=5nM	IC50	8.3	2002	protein-tyrosine phosphatase, non-receptor type	BGD	P18031	C32H36F4N4O12P2	806.589	806.174	90	92	316.25	1.25	3.04	4	12	18	OC(=O)CC[C@@H](C(=O)N[C@H](C(=O)N[C@H](C(=O)N)Cc1ccc(cc1)C(P(O)(O)O)(F)F)Cc1ccc(cc1)C(P(O)(O)O)(F)F)NC(=O)c1ccccc1	0	C267H80N87O76S4+11	valid
1lrh	refined	Protein-Ligand	1.9	Kd=0.15uM	Kd	6.82	2002	auxin-binding protein 1	NLA	P13689	C12H10O2	186.207	186.068	24	25	37.3	4.08	2.47	0	2	1	OC(=O)Cc1cccc2c1cccc2	1	C276H93N68O61Zn+8	train
1lrt	general	Protein-Ligand	2.2	Ki=2.3uM	Ki	5.64	2003	inosine-5'-monophosphate dehydrogenase	TAD	P50097	C20H29N7O13P2S	669.496	669.102	72	76	379.78	-6.16	-1.79	6	13	15	O[C@@H]1[C@H](O)[C@H](O[C@H]1c1scc(n1)C(=O)N)COP(CP(OC[C@H]1O[C@H]([C@@H]([C@@H]1O)O)n1cnc2c1ncnc2N)(O)O)(O)O	0	C387H121N111O125S5+8	train
1lst	refined	Protein-Ligand	1.8	Kd=14nM	Kd	7.85	1994	LYSINE, ARGININE, ORNITHINE-BINDING PROTEIN	LYS	P02911	C6H16N2O2	148.203	148.121	26	25	92.58	-2.35	-1.91	2	2	4	[NH3+]CCCC[C@@H](C(=O)O)[NH3+]	0	C287H106N71O101+2	test
1lt5	general	Protein-Ligand	1.7	IC50=2mM	IC50	2.7	1997	heat-labile enterotoxin	TDG	P32890	C12H22O10S	358.362	358.093	45	46	205.6	-3.39	-4.68	8	8	12	OC[C@H]1O[C@@H](S[C@@H]2O[C@H](CO)[C@@H]([C@@H]([C@H]2O)O)O)[C@@H]([C@H]([C@H]1O)O)O	0	C182H57N57O58S2+4	valid
1lt6	general	Protein-Ligand	2.2	IC50=0.5mM	IC50	3.3	1997	heat-labile enterotoxin	GAA	P32890	C12H15NO8	301.249	301.08	36	37	145.2	-0.41	-0.7	4	6	7	OC[C@H]1O[C@H](Oc2cccc(c2)N(=O)=O)[C@@H]([C@H]([C@H]1O)O)O	0	C176H55N55O57S+5	valid
1lv8	general	Protein-Ligand	2.3	Kd=3.5uM	Kd	5.46	2003	purine nucleoside phosphorylase	9PP	P55859	C9H16N6O4P	303.235	303.097	36	37	179.15	-2.31	0.26	2	6	4	Nc1nc(N)c2c(n1)n(cn2)C[C@@H](OCP(O)(O)O)C	0	C299H95N73O82S6+4	train
1lvu	refined	Protein-Ligand	2.05	Kd=4.8uM	Kd	5.32	2003	purine nucleoside phosphorylase	9PP	P55859	C9H16N6O4P	303.235	303.097	36	37	179.15	-2.31	0.26	2	6	4	Nc1nc(N)c2c(n1)n(cn2)C[C@@H](OCP(O)(O)O)C	0	C287H88N71O80S6+4	train
1lxf	general	Protein-Ligand	NMR	Kd=80uM	Kd	4.1	2002	troponin c, slow skeletal and cardiac muscles	BEP	P19429 P63316	C24H35N2O	367.548	367.275	62	64	16.91	5.31	4.98	1	0	10	CC(COC[C@@H]([NH+]1CCCC1)CN(c1ccccc1)Cc1ccccc1)C	0	C228H80N50O68S7+2	test
1lyb	refined	Protein-Ligand	2.5	Ki=3.8pM	Ki	11.42	1994	cathepsin D	6-mer	P07339	C34H63N5O9	685.892	685.463	111	110	223.26	4.43	3.42	7	9	28	CC(C[C@@H]([C@H](CC(=O)N[C@H](C(=O)N[C@H]([C@H](CC(=O)O)O)CC(C)C)C)O)NC(=O)[C@H](C(C)C)NC(=O)[C@H](C(C)C)NC(=O)CC(C)C)C	0	C464H136N112O128S4+4	test
1lyx	refined	Protein-Ligand	1.9	Ki=0.029mM	Ki	4.54	2003	triosephosphate isomerase	PGA	Q07412	C2H6O6P	157.039	156.99	15	14	120.81	-1.24	-1.26	0	5	1	OC(=O)COP(O)(O)O	0	C247H81N61O64S2+2	train
1lzo	general	Protein-Ligand	2.8	Ki=0.029mM	Ki	4.54	2003	triosephosphate isomerase	PGA	Q07412	C2H6O6P	157.039	156.99	15	14	120.81	-1.24	-1.26	0	5	1	OC(=O)COP(O)(O)O	0	C224H75N57O57S+3	valid
1lzq	refined	Protein-Ligand	2.2	Ki=4.1nM	Ki	8.39	2003	HIV-1 protease	0ZQ	P03367	C38H50N5O7	688.833	688.371	100	102	193.53	3.55	4.12	5	6	23	OC(=O)CC[C@@H](C(=O)N[C@H](C(=O)N)Cc1ccccc1)NC(=O)[C@H](Cc1ccccc1)[NH2+]CC[C@@H](NC(=O)OC(C)(C)C)Cc1ccccc1	0	C322H105N88O96S2+6	train
1m0b	refined	Protein-Ligand	2.45	Ki=1.53nM	Ki	8.82	2004	hiv-1 protease	0ZQ	P03367	C38H50N5O7	688.833	688.371	100	102	193.53	3.55	4.12	5	6	23	OC(=O)CC[C@@H](C(=O)N[C@H](C(=O)N)Cc1ccccc1)NC(=O)[C@H](Cc1ccccc1)[NH2+]CC[C@@H](NC(=O)OC(C)(C)C)Cc1ccccc1	0	C307H98N83O87S+6	test
1m0n	refined	Protein-Ligand	2.2	Ki=6.0mM	Ki	2.22	2002	2,2-dialkylglycine decarboxylase	HCP	P16932	C13H22N2O8P2	396.27	396.085	47	48	203.27	-2.5	0.7	1	8	5	Oc1c(C)ncc(c1/C=N/C1(CCCC1)P(O)(O)O)COP(O)(O)O	0	C346H135N92O120S2+4	train
1m0o	refined	Protein-Ligand	2.4	Ki=4.9mM	Ki	2.31	2002	2,2-dialkylglycine decarboxylase	MPM	P16932	C12H22N2O8P2	384.259	384.085	46	46	203.27	-2.45	0.55	1	8	6	CC[C@@](P(O)(O)O)(/N=C/c1c(cnc(c1O)C)COP(O)(O)O)C	0	C348H134N94O115S2+5	train
1m0q	refined	Protein-Ligand	2	Ki=0.13mM	Ki	3.89	2002	2,2-dialkylglycine decarboxylase	EPC	P16932	C10H18N2O8P2	356.206	356.054	40	40	203.27	-3.16	-0.23	1	8	5	Oc1c(C)ncc(c1/C=N/[C@@H](P(O)(O)O)C)COP(O)(O)O	0	C356H144N96O122S2+5	train
1m13	general	Protein-Ligand	2.15	Kd=27nM	Kd	7.57	2003	orphan nuclear receptor pxr	HYF	O75469	C35H52O4	536.785	536.387	91	92	71.44	10.18	8.99	1	4	12	CC(=CCC[C@]1(C)[C@H](CC=C(C)C)C[C@]2(C(=O)[C@]1(C(=O)C(C)C)C(=C(C2=O)CC=C(C)C)O)CC=C(C)C)C	0	C500H148N121O122S9+11	test
1m1b	refined	Protein-Ligand	2.25	Ki=22uM	Ki	4.66	2002	phosphoenolpyruvate phosphomutase	SPV	P56839	C3H6O6S	170.141	169.989	16	15	140.36	-0.45	-0.14	0	6	1	OC(=O)C(=O)CS(O)(O)O	1	C262H103MgN74O74S+6	train
1m2p	refined	Protein-Ligand	2	Ki=0.78uM	Ki	6.11	2003	casein kinase ii	HNA	P28523	C14H7NO6	285.208	285.027	28	30	120.42	2.54	2.3	2	6	2	O=C1c2cccc(c2C(=O)c2c1c(ccc2O)N(=O)=O)O	0	C271H83N71O71S2+7	train
1m2q	refined	Protein-Ligand	1.79	Ki=0.80uM	Ki	6.1	2003	casein kinase ii	MNX	P28523	C13H7NO6	273.198	273.027	27	29	116.49	2.63	2.79	2	5	2	Oc1ccc(c2c1c(=O)c1c(o2)cccc1O)N(=O)=O	0	C260H86N67O67S2+8	test
1m2r	refined	Protein-Ligand	1.7	Ki=0.35uM	Ki	6.46	2003	casein kinase ii	MNY	P28523	C14H10N2O4	270.24	270.064	30	32	126.64	1.9	2.2	4	4	2	Nc1ccc(c2c1C(=O)c1c(O)ccc(c1C2=O)O)N	0	C269H81N69O69S2+8	train
1m2x	refined	Protein-Ligand	1.5	Ki=70uM	Ki	4.15	2003	class b carbapenemase blab-1	MCO	O08498	C9H15NO3S	217.285	217.077	29	29	96.41	1.52	0.57	0	3	4	SC[C@H](C(=O)N1CCC[C@@H]1C(=O)O)C	1	C202H74N62O63SZn2+8	train
1m48	refined	Protein-Ligand	1.95	Kd=8.2uM	Kd	5.09	2002	interleukin-2	FRG	P60568	C26H31N4O3	447.549	447.24	64	66	110.25	4.56	1.49	1	2	9	COC(=O)[C@H](Cc1ccc(cc1)C#Cc1ccccc1)NC(=O)C[C@H]1CCCN(C1)C(=[NH2+])N	0	C204H58N46O52S3+5	train
1m4h	refined	Protein-Ligand	2.1	Ki=0.3nM	Ki	9.52	2002	secretase beta	7-mer	P56817	C44H70N7O15	937.064	936.493	136	136	371.67	4.24	1.52	8	15	34	CC(C[C@@H]([C@H](C[C@H](C(=O)N[C@H](C(=O)N[C@H](C(=O)N[C@H](C(=O)O)Cc1ccccc1)CCC(=O)O)C(C)C)C)O)NC(=O)[C@@H](NC(=O)[C@@H](NC(=O)[C@H](CCC(=O)O)[NH3+])CC(C)C)CC(=O)O)C	0	C345H104N86O98+7	test
1m51	general	Protein-Ligand	2.25	IC50=18.8uM	IC50	4.73	2003	phosphoenolpyruvate carboxykinase, cytosolic	TSX	P35558	C21H25N5O3	395.455	395.196	54	56	101.78	2.64	2.49	2	4	9	CCCCn1c2nc([nH]c2c(=O)n(c1=O)CC=C)Cc1ccc(cc1)NC(=O)C	0	C242H73N67O62S3+5	train
1m5b	general	Protein-Ligand	1.85	IC50=9.7nM	IC50	8.01	2002	glutamate receptor 2	BN1	P19491	C8H11N6O4	255.211	255.084	29	30	154.54	-2.85	-2.6	2	6	3	OC(=O)[C@H](Cc1c(=O)[nH]oc1c1nnn(n1)C)[NH3+]	0	C338H108N73O92S5+4	valid
1m5c	general	Protein-Ligand	1.65	IC50=0.5uM	IC50	6.3	2002	glutamate receptor 2	BRH	P19491	C6H8BrN2O4	252.043	250.967	21	21	110.94	-1.82	-1.03	2	3	2	OC(=O)[C@H](Cc1o[nH]c(=O)c1Br)[NH3+]	0	C255H92N58O76S2+4	valid
1m5d	general	Protein-Ligand	1.73	IC50=9.2uM	IC50	5.04	2002	glutamate receptor 2	BRH	P19491	C6H8BrN2O4	252.043	250.967	21	21	110.94	-1.82	-1.03	2	3	2	OC(=O)[C@H](Cc1o[nH]c(=O)c1Br)[NH3+]	0	C274H93N61O77S3+4	valid
1m5e	general	Protein-Ligand	1.46	IC50=20.1nM	IC50	7.7	2002	glutamate receptor 2	AM1	P19491	C8H11N2O5	215.183	215.067	26	26	128.27	-1.03	-1.08	1	5	2	[NH3+][C@H](C(=O)O)Cc1c(C)onc1C(=O)O	0	C306H101N66O84S4+3	train
1m5f	general	Protein-Ligand	1.95	IC50=14.8nM	IC50	7.83	2002	glutamate receptor 2	AM1	P19491	C8H11N2O5	215.183	215.067	26	26	128.27	-1.03	-1.08	1	5	2	[NH3+][C@H](C(=O)O)Cc1c(C)onc1C(=O)O	0	C312H97N70O84S4+5	valid
1m5w	refined	Protein-Ligand	1.96	Kd=54uM	Kd	4.27	2003	pyridoxal phosphate biosynthetic protein pdxj	DXP	P0A794	C5H12O7P	215.118	215.032	25	24	141.04	-3.23	-2.03	2	6	6	O[C@@H]([C@@H](C(=O)C)O)COP(O)(O)O	0	C261H98N81O80S2+5	valid
1m7d	refined	Protein-Ligand	2.3	Kd=0.59uM	Kd	6.23	2003	antibody fab	3-mer	P01801 A2NHM3	C21H37NO13	511.517	511.226	72	74	205.86	-3.27	-3.3	7	7	14	OC[C@H]1O[C@@H](OC)[C@@H]([C@H]([C@@H]1O)O[C@@H]1O[C@@H](C)[C@@H]([C@H](C1)O[C@@H]1O[C@@H](C)[C@@H]([C@H]([C@H]1O)O)O)O)NC(=O)C	0	C307H87N79O82S2+3	train
1m7i	refined	Protein-Ligand	2.5	Kd=4.0uM	Kd	5.4	2003	antibody fab	5-mer	P01801 A2NHM3	C33H57NO22	819.799	819.337	113	117	343.93	-6.43	-6.63	12	12	23	OC[C@H]1O[C@@H](O[C@H]2[C@H](OC)O[C@H]([C@@H]([C@H]2O)O)C)[C@@H]([C@H]([C@@H]1O)O[C@@H]1O[C@@H](C)[C@@H]([C@H]([C@H]1O)O[C@@H]1O[C@@H](C)[C@@H]([C@H]([C@H]1O[C@@H]1O[C@@H](C)[C@@H]([C@H]([C@H]1O)O)O)O)O)O)NC(=O)C	0	C360H104N94O97S2+7	valid
1m7q	general	Protein-Ligand	2.4	IC50=2.6nM	IC50	8.59	2002	mitogen-activated protein kinase 14	DQO	Q16539	C24H19Cl2F2N4O	488.337	487.09	52	56	54.74	5	5.66	1	1	3	Fc1ccc(c(c1)F)c1cc(cc2c1cnc(=O)n2c1c(Cl)cccc1Cl)N1CC[NH2+]CC1	0	C313H97N82O86S2+5	train
1m7y	refined	Protein-Ligand	1.6	Kd=0.011nM	Kd	10.96	2002	1-aminocyclopropane-1-carboxylate synthase	PPG	P37821	C14H25N3O8P	394.337	394.138	51	51	207.41	-5.88	-2.44	3	7	10	[NH3+]CCO/C=C/[C@@H](C(=O)O)[NH2+]Cc1c(cnc(c1O)C)COP(O)(O)O	0	C309H113N81O89S2+5	train
1m9n	general	Protein-Ligand	1.93	Ki=0.12uM	Ki	6.92	2003	aicar transformylase-imp cyclohydrolase	XMP	P31335	C10H14N4O9P	365.213	365.05	38	40	216.74	-4.22	-3.3	4	8	5	O=c1[nH]c(=O)c2c([nH]1)n(cn2)[C@@H]1O[C@@H]([C@H]([C@H]1O)O)COP(O)(O)O	0	C298H97N80O80S2+7	train
1mai	refined	Protein-Ligand	1.9	Kd=210nM	Kd	6.68	1996	phospholipase C delta-1	I3P	P10688	C6H18O15P3	423.119	422.986	42	42	311.22	-7.48	-4.8	3	12	6	O[C@@H]1[C@@H](OP(O)(O)O)[C@H](OP(O)(O)O)[C@H]([C@@H]([C@@H]1O)OP(O)(O)O)O	0	C147H44N52O41S+9	train
1maw	general	Protein-Ligand	3	Kd=80mM	Kd	1.1	2003	tryptophan-trna ligase	ATP	P00953	C10H19N5O13P3	510.205	510.019	50	52	329.38	-6.07	-2.36	3	12	9	O[C@@H]1[C@@H](COP(OP(OP(O)(O)O)(O)O)(O)O)O[C@H]([C@@H]1O)n1cnc2c1ncnc2N	0	C319H108N83O81S3+8	train
1mcz	general	Protein-Ligand	2.8	Ki=1mM	Ki	3	2003	benzoylformate decarboxylase	RMN	P20906	C8H8O3	152.147	152.047	19	19	57.53	1.72	0.8	1	3	2	O[C@H](c1ccccc1)C(=O)O	1	C246H89MgN68O78S+3	valid
1mdl	general	Protein-Ligand	1.85	Ki=810uM	Ki	3.09	1996	Pseudomonas aeruginosa MANDELATE RACEMASE MUTANT K166R	RMN	P11444	C8H8O3	152.147	152.047	19	19	57.53	1.72	0.8	1	3	2	O[C@H](c1ccccc1)C(=O)O	1	C259H101MgN69O74S4+6	train
1me3	general	Protein-Ligand	1.2	Ki=64.6nM	Ki	7.19	2002	cruzipain	P10	P25779	C27H29N3O5	475.536	475.211	64	66	117.62	3.15	3.38	3	5	16	OCC(=O)[C@@H](NC(=O)[C@H](Cc1ccccc1)NC(=O)OCc1cccnc1)CCc1ccccc1	0	C217H69N61O77S4+2	train
1me4	general	Protein-Ligand	1.2	Ki=146nM	Ki	6.84	2002	cruzipain	T10	P25779	C27H28N2O5	460.522	460.2	62	64	104.73	3.86	3.59	3	4	15	OCC(=O)[C@@H](NC(=O)[C@H](Cc1ccccc1)NC(=O)OCc1ccccc1)Cc1ccccc1	0	C230H74N65O83S5+	train
1me7	general	Protein-Ligand	2.15	Ki=65nM	Ki	7.19	2003	inosine-5'-monophosphate dehydrogenase	RVP	P50097	C8H14N4O8P	325.193	325.055	35	36	207	-4.21	-2.63	3	8	6	O[C@@H]1[C@H](O)[C@H](O[C@H]1n1cnc(n1)C(=O)N)COP(O)(O)O	0	C312H110N90O101S5+6	train
1me8	general	Protein-Ligand	1.9	Ki=65nM	Ki	7.19	2003	inosine-5'-monophosphate dehydrogenase	RVP	P50097	C8H14N4O8P	325.193	325.055	35	36	207	-4.21	-2.63	3	8	6	O[C@@H]1[C@H](O)[C@H](O[C@H]1n1cnc(n1)C(=O)N)COP(O)(O)O	0	C302H106N83O99S4+6	train
1mem	general	Protein-Ligand	1.8	Ki=11.5nM	Ki	7.94	1998	cathepsin k	0D6	P43235	C28H41N4O4S	529.715	529.285	78	80	120.57	3.63	5.34	3	4	15	CC(C[C@@H](C(=O)N[C@H](CCS(=O)(=O)c1ccccc1)CCc1ccccc1)NC(=O)N1CC[NH2+]CC1)C	0	C231H70N65O78S4	test
1mes	refined	Protein-Ligand	1.9	Ki=20nM	Ki	7.7	1998	HIV-1 protease I84V	DMP	P03366	C35H38N2O5	566.687	566.278	80	84	104.47	3.53	3.93	4	5	14	OCc1ccc(cc1)CN1[C@H](Cc2ccccc2)[C@H](O)[C@H]([C@H](N(C1=O)Cc1ccc(cc1)CO)Cc1ccccc1)O	0	C356H113N94O99S2+6	train
1met	refined	Protein-Ligand	1.9	Ki=0.4nM	Ki	9.4	1998	HIV-1 protease V82F	DMP	P03366	C35H38N2O5	566.687	566.278	80	84	104.47	3.53	3.93	4	5	14	OCc1ccc(cc1)CN1[C@H](Cc2ccccc2)[C@H](O)[C@H]([C@H](N(C1=O)Cc1ccc(cc1)CO)Cc1ccccc1)O	0	C379H121N98O104S2+6	train
1meu	general	Protein-Ligand	1.9	Ki=0.8uM	Ki	6.1	1998	HIV-1 protease v82f i84v	DMP	P03366	C35H38N2O5	566.687	566.278	80	84	104.47	3.53	3.93	4	5	14	OCc1ccc(cc1)CN1[C@H](Cc2ccccc2)[C@H](O)[C@H]([C@H](N(C1=O)Cc1ccc(cc1)CO)Cc1ccccc1)O	0	C375H112N96O103S2+6	test
1mf4	general	Protein-Ligand	1.9	Ki=10.2nM	Ki	7.99	2003	phospholipase a2	5-mer	P60045	C26H44N8O7	580.677	580.333	85	85	267.58	-0.72	-2.37	6	7	21	OC[C@@H](C(=O)O)NC(=O)[C@@H](NC(=O)[C@H](Cc1ccccc1)NC(=O)[C@@H](NC(=O)[C@H](C(C)C)[NH3+])C)CCC[NH+]=C(N)N	1	C285H89CaN73O81S6+7	train
1mfa	refined	Protein-Ligand	1.7	Kd=9.1uM	Kd	5.04	1994	14-3-3-like protein c	3-mer		C19H34O14	486.465	486.195	67	69	217.22	-3.77	-4.86	8	8	15	CO[C@H]1O[C@H](CO)[C@H]([C@@H]([C@@H]1O[C@H]1O[C@H](CO)[C@@H]([C@@H]([C@H]1O)O)O)O[C@H]1O[C@H](C)[C@@H](C[C@H]1O)O)O	0	C216H60N59O55S+4	train
1mfd	refined	Protein-Ligand	2.1	Kd=4.9uM	Kd	5.31	1994	ig kappa-chain	3-mer		C19H34O14	486.465	486.195	67	69	217.22	-3.77	-4.86	8	8	15	CO[C@H]1O[C@H](CO)[C@H]([C@@H]([C@@H]1O[C@H]1O[C@H](CO)[C@@H]([C@@H]([C@H]1O)O)O)O[C@H]1O[C@H](C)[C@@H](C[C@H]1O)O)O	0	C205H58N57O53S2+3	train
1mfg	general	Protein-Ligand	1.25	Kd=50uM	Kd	4.3	2003	erb-b2 interacting protein	9-mer	Q96RT1 P04626	C47H74N9O15	1005.14	1004.53	145	146	383.78	3.07	1.06	9	15	35	CC(C[C@@H](C(=O)N[C@H](C(=O)N[C@H](C(=O)N1CCC[C@H]1C(=O)N[C@H](C(=O)O)C(C)C)C(C)C)CC(=O)O)NC(=O)CNC(=O)[C@@H](NC(=O)[C@@H](NC(=O)[C@H](CCC(=O)O)[NH3+])Cc1ccc(cc1)O)CC(C)C)C	0	C264H81N68O73+5	train
1mfi	refined	Protein-Ligand	1.8	Ki=2.6uM	Ki	5.59	1999	macrophage migration inhibitory factor	FHC	P34884	C9H7FO3	182.148	182.038	20	20	57.53	2.71	1.79	1	3	2	Oc1ccc(cc1)/C=C(\C(=O)O)/F	0	C224H68N49O55S3+4	valid
1mh5	refined	Protein-Ligand	2.1	Kd=0.61nM	Kd	9.21	2003	immunoglobulin ms6-164	HAL	P01863 P01837	C23H30N2O7P	477.467	477.179	63	64	158.78	2.82	2.83	2	6	15	O=C(COP([C@@H](Cc1ccccc1)NC(=O)CCCC(=O)O)(O)O)NCCc1ccccc1	0	C373H94N90O88S+5	train
1mhw	general	Protein-Ligand	1.9	Ki=45nM	Ki	7.35	2002	cathepsin l	5-mer	P07711	C40H48N7O5S	738.918	738.344	101	104	241.44	6.02	3.69	5	5	25	SC[C@@H](C(=O)N[C@@H](C(=O)N[C@H](C(=O)NCCc1ccccc1)Cc1ccc(cc1)O)CCC[NH+]=C(N)N)NC(=O)Cc1ccc(cc1)c1ccccc1	0	C305H105N81O107S5+4	test
1mj7	general	Protein-Ligand	2.25	Kd=4.50nM	Kd	8.35	2003	immunoglobulin ms5-393	HAL		C23H30N2O7P	477.467	477.179	63	64	158.78	2.82	2.83	2	6	15	O=C(COP([C@@H](Cc1ccccc1)NC(=O)CCCC(=O)O)(O)O)NCCc1ccccc1	0	C314H85N76O74S2+6	valid
1mjj	refined	Protein-Ligand	2.1	Kd=1.83nM	Kd	8.74	2003	immunoglobulin ms6-12	HAL		C23H30N2O7P	477.467	477.179	63	64	158.78	2.82	2.83	2	6	15	O=C(COP([C@@H](Cc1ccccc1)NC(=O)CCCC(=O)O)(O)O)NCCc1ccccc1	0	C364H92N80O82S+5	test
1mkd	general	Protein-Ligand	2.9	IC50=160nM	IC50	6.8	2003	camp-specific phosphodiesterase 4d	ZAR	Q08499	C12H10F2N2O3	268.216	268.066	29	30	64.21	2.15	2.05	1	1	4	COc1cc(ccc1OC(F)F)c1ccc(=O)[nH]n1	1	C298H115MgN83O85S4Zn+6	test
1ml1	general	Protein-Ligand	2.6	Ki=52uM	Ki	4.28	1997	triosephosphate isomerase	PGA	P04789	C2H6O6P	157.039	156.99	15	14	120.81	-1.24	-1.26	0	5	1	OC(=O)COP(O)(O)O	0	C227H78N58O62S+3	train
1mm6	general	Protein-Ligand	2.15	IC50=20nM	IC50	7.7	2003	glutamate receptor 2	QUS	P19491	C5H8N3O5	190.134	190.046	21	21	132.94	-3	-3.18	2	4	2	OC(=O)[C@H](Cn1oc(=O)[nH]c1=O)[NH3+]	0	C264H91N58O75S3+4	train
1mm7	general	Protein-Ligand	1.65	IC50=20nM	IC50	7.7	2003	glutamate receptor 2	QUS	P19491	C5H8N3O5	190.134	190.046	21	21	132.94	-3	-3.18	2	4	2	OC(=O)[C@H](Cn1oc(=O)[nH]c1=O)[NH3+]	0	C273H94N61O78S3+4	train
1mmp	general	Protein-Ligand	2.3	Ki=0.85uM	Ki	6.07	1996	matrilysin	RSS	P09237	C25H35N3O4	441.563	441.263	67	69	100.43	4.69	4.22	2	4	6	CC(C[C@@H](C(=O)N[C@H]1Cc2cn(c3c2cccc3)CCCCCCNC1=O)CC(=O)O)C	1	C242H82CaN63O65SZn+6	train
1mmq	refined	Protein-Ligand	1.9	Ki=0.03uM	Ki	7.52	1996	matrilysin	RRS	P09237	C25H36N4O4	456.578	456.274	69	71	112.46	2.51	4.03	4	4	9	ONC(=O)C[C@H](C(=O)N[C@H]1Cc2cn(c3c2cccc3)CCCCCCNC1=O)CC(C)C	1	C248H76CaN64O67S2Zn+5	test
1mmr	refined	Protein-Ligand	2.3	Ki=4.0uM	Ki	5.4	1996	matrilysin	SRS	P09237	C25H39N5O2S	473.674	473.282	72	74	119.21	5.69	5.9	2	2	7	CC(C[C@@H](C(=O)N[C@H]1Cc2cn(c3c2cccc3)CCCCCCNC1=O)CS(=N)(=N)C)C	1	C238H74CaN62O63SZn+5	valid
1mnc	general	Protein-Ligand	2.1	IC50=0.046nM	IC50	10.34	1995	catalytic domain of human neutrophil collagenase (MMP8 CLG1)	PLH	P22894	C18H27N3O4	349.425	349.2	52	52	107.53	1.29	2.19	4	4	13	CNC(=O)[C@H](Cc1ccccc1)NC(=O)[C@@H](CC(=O)NO)CC(C)C	1	C251H72CaN63O68SZn+4	train
1mns	general	Protein-Ligand	2	Ki=67uM	Ki	4.17	1993	mandelate racemase	APG	P11444	C9H10O3	166.174	166.063	22	22	57.53	1.91	0.98	1	3	2	OC(=O)[C@](c1ccccc1)(O)C	1	C277H107MgN74O82S2+7	train
1moq	refined	Protein-Ligand	1.57	Ki=0.35mM	Ki	3.46	1998	glucosamine 6-phosphate synthase	GLP	P17169	C6H16NO8P	261.167	261.061	32	32	181.07	-6.93	-4.29	4	6	5	O[C@@H]1[C@@H](COP(O)(O)O)O[C@@H]([C@@H]([C@H]1O)[NH3+])O	0	C262H95N71O89S2+6	train
1mpl	general	Protein-Ligand	1.12	Ki=0.17mM	Ki	3.77	2003	d-alanyl-d-alanine carboxypeptidase	RE1	P15555	C11H24N3O6P	325.299	325.14	45	44	177.19	-3.72	-1.37	3	6	11	[NH3+]CC(=O)N[C@H](C(=O)O)CCCCC(=O)N[C@@H](P(O)O)C	0	C293H99N76O93S+3	train
1mq5	refined	Protein-Ligand	2.1	Ki=1nM	Ki	9	2003	coagulation factor xa	XLC	P00742	C24H25Cl3N4O2S	539.905	538.076	59	62	95.32	5.69	6.41	4	2	8	C[N@@H+]1CC[N@H+](CC1)Cc1csc(c1Cl)C(=O)Nc1ccc(cc1C(=O)Nc1ccc(cc1)Cl)Cl	0	C307H106N85O94S4+8	test
1mq6	refined	Protein-Ligand	2.1	Ki=7pM	Ki	11.15	2003	coagulation factor xa	XLD	P00742	C23H20Cl3N5O4S	568.86	567.03	56	59	133.39	4.66	5.02	2	3	10	COc1cc(Cl)cc(c1NC(=O)c1scc(c1Cl)CN(C1=NCCO1)C)C(=O)Nc1ccc(cn1)Cl	0	C296H104N79O91S4+7	train
1mqd	general	Protein-Ligand	1.46	IC50=0.17uM	IC50	6.77	2003	glutamate receptor subunit 2	SHI	P19491	C6H9N2O4	173.147	173.056	21	21	110.94	-2.72	-1.79	2	3	2	OC(=O)[C@H](Cc1co[nH]c1=O)[NH3+]	0	C285H95N67O82S3+5	train
1mqg	general	Protein-Ligand	2.15	IC50=0.52uM	IC50	6.28	2003	glutamate receptor 2	IWD	P19491	C7H9IN3O4	326.069	325.964	24	24	119.8	-2.84	-2.16	2	4	2	OC(=O)[C@H](Cn1cc(I)c(=O)[nH]c1=O)[NH3+]	0	C290H101N64O82S4+4	train
1mqh	general	Protein-Ligand	1.8	IC50=0.30uM	IC50	6.52	2003	glutamate receptor 2	BWD	P19491	C7H9BrN3O4	279.068	277.978	24	24	119.8	-2.6	-2.01	2	4	2	OC(=O)[C@H](Cn1cc(Br)c(=O)[nH]c1=O)[NH3+]	0	C295H102N64O83S3+4	train
1mqi	general	Protein-Ligand	1.35	IC50=23.53nM	IC50	7.63	2003	glutamate receptor 2	FWD	P19491	C7H9FN3O4	218.162	218.058	24	24	119.8	-3.19	-2.63	2	4	2	OC(=O)[C@H](Cn1cc(F)c(=O)[nH]c1=O)[NH3+]	0	C281H102N62O80S3+4	train
1mqj	general	Protein-Ligand	1.65	IC50=4.76uM	IC50	5.32	2003	glutamate receptor 2	HWD	P19491	C7H10N3O4	200.172	200.067	24	24	119.8	-3.5	-2.77	2	4	2	OC(=O)[C@H](Cn1ccc(=O)[nH]c1=O)[NH3+]	0	C266H97N60O78S3+4	test
1mrn	refined	Protein-Ligand	2.45	Ki=30uM	Ki	4.52	2003	thymidylate kinase	T5A	P9WKE1	C20H35N7O23P5	896.394	896.047	90	94	529.26	-8.85	-3.47	5	18	19	O[C@H]1C[C@@H](O[C@@H]1COP(OP(OP(OP(OP(OC[C@H]1O[C@H]([C@@H]([C@@H]1O)O)n1cnc2c1ncnc2N)(O)O)(O)O)(O)O)(O)O)(O)O)n1cc(C)c(=O)[nH]c1=O	1	C322H105MgN107O98+13	train
1mrs	refined	Protein-Ligand	2	Ki=110uM	Ki	3.96	2003	thymidylate kinase	5HU	P9WKE1	C10H16N2O9P	339.216	339.059	38	39	188.06	-3.46	-2.65	3	7	6	OCc1cn([C@H]2C[C@@H]([C@H](O2)COP(O)(O)O)O)c(=O)[nH]c1=O	1	C313H110MgN96O93S+10	train
1mrw	refined	Protein-Ligand	2	Kd=0.2nM	Kd	9.7	2003	pol polyprotein	K57	P03367	C28H37N3O5S	527.675	527.245	74	76	144.27	3.61	3.72	4	5	13	O=C([C@H]1N(CSC1(C)C)C(=O)[C@H]([C@@H](NC(=O)c1cccc(c1C)O)Cc1ccccc1)O)NC(C)(C)C	0	C348H115N92O97S2+6	train
1mrx	refined	Protein-Ligand	2	Kd=55nM	Kd	7.26	2003	pol polyprotein	K57	P03367	C28H37N3O5S	527.675	527.245	74	76	144.27	3.61	3.72	4	5	13	O=C([C@H]1N(CSC1(C)C)C(=O)[C@H]([C@@H](NC(=O)c1cccc(c1C)O)Cc1ccccc1)O)NC(C)(C)C	0	C357H114N93O98S2+6	train
1ms0	general	Protein-Ligand	2.5	Ki=1.23mM	Ki	2.91	2003	Trypanosoma cruzi trans-sialidase	DAN	Q26966	C11H19NO8	293.27	293.111	39	39	156.55	-1.82	-2.8	5	7	9	OC[C@H]([C@H]([C@@H]1O[C@H](C[C@@H]([C@H]1NC(=O)C)O)C(=O)O)O)O	0	C256H102N77O81+6	test
1ms6	general	Protein-Ligand	1.9	Kd=0.3nM	Kd	9.52	2003	cathepsin s	BLN	P25774	C21H32N4O4	404.503	404.242	61	62	103.75	1.25	2.61	2	2	13	N=C[C@@H](NC(=O)[C@@H](NC(=O)N1CCOCC1)CC(C)C)COCc1ccccc1	0	C253H70N70O71S4+4	train
1ms7	general	Protein-Ligand	1.97	IC50=0.17uM	IC50	6.77	2003	glutamate receptor subunit 2	SHI	P19491	C6H9N2O4	173.147	173.056	21	21	110.94	-2.72	-1.79	2	3	2	OC(=O)[C@H](Cc1co[nH]c1=O)[NH3+]	0	C273H94N61O78S3+4	train
1msm	refined	Protein-Ligand	2	Kd=33pM	Kd	10.48	2003	pol polyprotein	JE2	P03367	C32H37N3O5S	575.718	575.245	78	81	144.27	4.49	4.43	4	5	14	O[C@H](C(=O)N1CSC([C@H]1C(=O)NCc1ccccc1C)(C)C)[C@@H](NC(=O)c1cccc(c1C)O)Cc1ccccc1	0	C360H119N95O101S2+6	train
1msn	refined	Protein-Ligand	2	Kd=0.81nM	Kd	9.09	2003	pol polyprotein	JE2	P03367	C32H37N3O5S	575.718	575.245	78	81	144.27	4.49	4.43	4	5	14	O[C@H](C(=O)N1CSC([C@H]1C(=O)NCc1ccccc1C)(C)C)[C@@H](NC(=O)c1cccc(c1C)O)Cc1ccccc1	0	C360H116N94O100S2+6	train
1mtr	refined	Protein-Ligand	1.75	Ki=4nM	Ki	8.4	1996	HIV-1 protease	PI6	P03369	C33H49N4O6	597.765	597.365	92	94	142.6	4.96	3.14	5	4	13	CC[C@@H]([C@@H]1NC(=O)[C@@H]([NH2+]C[C@H]([C@H](Cc2ccccc2)NC(=O)OC(C)(C)C)O)Cc2ccc(OCCCNC1=O)cc2)C	0	C344H111N91O95S2+6	train
1mu6	refined	Protein-Ligand	1.99	Ki=4.2nM	Ki	8.38	2004	thrombin alpha	CDA	P28506 P00734	C20H19F3N6O2	432.399	432.152	50	52	101.8	0.67	2.47	2	4	9	O=C(Cn1c(C)cnc(c1=O)NCC(c1ccccn1)(F)F)NCc1ncccc1F	0	C319H103N88O95S6+8	train
1mu8	refined	Protein-Ligand	2	Ki=1.0nM	Ki	9	2004	thrombin alpha	CDB	P28506 P00734	C21H21F3N6O2	446.426	446.168	53	55	101.8	1.03	2.77	2	4	9	O=C(Cn1c(C)cnc(c1=O)NCC(c1ccccn1)(F)F)NCc1nccc(c1F)C	0	C339H105N90O98S6+7	train
1mue	refined	Protein-Ligand	2	Ki=2.3nM	Ki	8.64	2004	thrombin alpha	CDD	P28506 P00734	C20H17ClF3N5O3	467.829	467.097	49	51	101.48	1.17	3.45	2	3	9	O=C(Cn1c(Cl)cnc(c1=O)NCC(c1cccc[n+]1[O-])(F)F)NCc1ccccc1F	0	C329H101N88O95S6+7	valid
1mui	general	Protein-Ligand	2.8	Ki=1.3pM	Ki	11.89	2002	hiv-1 protease	AB1	Q903J0	C37H48N4O5	628.801	628.362	94	97	120	5.92	5.38	4	4	18	O=C(N[C@H]([C@H](C[C@H](Cc1ccccc1)NC(=O)[C@@H](N1CCCNC1=O)C(C)C)O)Cc1ccccc1)COc1c(C)cccc1C	0	C360H112N96O101S2+6	train
1mwt	general	Protein-Ligand	2.45	Kd=13.3mM	Kd	1.88	2002	penicillin-binding protein 2a	PNM	Q93IC2	C16H21N2O4S	337.414	337.122	44	45	125.38	-0.29	1.74	2	4	6	O=C[C@H]([C@@H]1[NH2+][C@H](C(S1)(C)C)C(=O)O)NC(=O)Cc1ccccc1	0	C228H82N64O74S+4	test
1mxo	general	Protein-Ligand	1.83	Ki=1nM	Ki	9	2003	beta-lactamase	SM2	P00811	C14H14BNO5S	319.141	319.069	36	37	135.1	1.93	1.34	3	5	8	O=C(N[C@@H](c1cccc(c1)C(=O)O)B(O)O)Cc1cccs1	0	C249H86N73O81+6	test
1mxu	general	Protein-Ligand	1.8	IC50=4.0uM	IC50	5.4	2003	glutamate receptor 2	BWD	P19491	C7H9BrN3O4	279.068	277.978	24	24	119.8	-2.6	-2.01	2	4	2	OC(=O)[C@H](Cn1cc(Br)c(=O)[nH]c1=O)[NH3+]	0	C295H102N64O83S3+4	train
1my2	general	Protein-Ligand	1.8	Ki=17nM	Ki	7.77	2003	Rat GluR2 ligand-binding core (S1S2J)	AMQ	P19491	C7H11N2O4	187.173	187.072	24	24	111.2	-1.7	-1.07	2	4	3	OC(=O)[C@H](Cc1c(C)onc1O)[NH3+]	0	C294H93N68O82S3+5	test
1my3	general	Protein-Ligand	1.75	IC50=4.0uM	IC50	5.4	2003	glutamate receptor 2	BWD	P19491	C7H9BrN3O4	279.068	277.978	24	24	119.8	-2.6	-2.01	2	4	2	OC(=O)[C@H](Cn1cc(Br)c(=O)[nH]c1=O)[NH3+]	0	C295H102N64O83S3+4	train
1my4	refined	Protein-Ligand	1.9	Ki=105nM	Ki	6.98	2003	Rat GluR2 Ligand Binding Core (S1S2J)	IWD	P19491	C7H9IN3O4	326.069	325.964	24	24	119.8	-2.84	-2.16	2	4	2	OC(=O)[C@H](Cn1cc(I)c(=O)[nH]c1=O)[NH3+]	0	C293H102N65O83S4+4	test
1my8	general	Protein-Ligand	1.72	Ki=35nM	Ki	7.46	2003	beta-lactamase	SM3	P00811	C13H14BNO3S	275.131	275.079	33	34	97.8	1.32	1.65	3	3	8	O=C(N[C@@H](c1ccccc1)B(O)O)Cc1cccs1	0	C261H91N75O84+6	train
1mzc	general	Protein-Ligand	2	IC50=0.06nM	IC50	10.22	2003	farnesyltransferase alpha subunit	BNE	P49354 P49356	C28H34N5O2	472.602	472.271	69	72	98.79	3.03	3.82	1	3	6	N#Cc1ccc(cc1Oc1cccc(c1)[C@]1(CC)CCCCN(C1=O)C)[C@@](c1cncn1C)([NH3+])C	1	C396H128N99O98S7Zn+7	valid
1mzs	general	Protein-Ligand	2.1	IC50=7.0uM	IC50	5.15	2002	3-oxoacyl-[acyl-carrier-protein] synthase iii	669	P0A6R0	C22H21Cl2NO5	450.312	449.08	51	53	88.76	7.31	5.87	0	4	8	OC(=O)CCCCCn1c(cc2c1ccc(c2)OCc1c(Cl)cccc1Cl)C(=O)O	0	C314H107N83O83S+7	train
1n0s	refined	Protein-Ligand	2	Kd=35.2nM	Kd	7.45	2003	bilin-binding protein	FLU	P09464	C20H12O5	332.306	332.068	37	40	87.74	3.53	3.97	1	4	2	Oc1ccc2c(c1)oc1c(c2c2ccccc2C(=O)O)ccc(=O)c1	0	C344H96N84O85S2+8	train
1n0t	general	Protein-Ligand	2.1	IC50=12.2uM	IC50	4.91	2003	glutamate receptor 2	AT1	P19491	C11H21N2O7P	324.267	324.109	42	42	174.48	-1.96	-0.71	1	6	5	OC(=O)[C@H](Cc1c(noc1C(C)(C)C)OCP(O)(O)O)[NH3+]	0	C324H106N73O92S4+5	valid
1n1g	general	Protein-Ligand	2.5	IC50~5mM	IC50	2.3	2003	glycerol-3-phosphate dehydrogenase	BCP	P90551	C5H2BrClN4	233.453	231.915	13	14	54.46	2.09	1.77	1	3	0	Brc1nc(Cl)c2c(n1)[nH]cn2	0	C166H50N37O39S+	valid
1n1m	refined	Protein-Ligand	2.5	Ki=2uM	Ki	5.7	2002	dipeptidyl peptidase iv/cd26	A3M	P27487	C9H19N2O	171.26	171.15	31	31	47.95	0.67	-0.19	1	1	3	[NH3+][C@H](C(=O)N1CCCC1)C(C)C	1	C276H84HgN70O71S+5	train
1n1t	general	Protein-Ligand	1.6	Ki=140uM	Ki	3.85	2003	sialidase	DAN	O44049	C11H17NO8	291.255	291.095	37	37	156.55	-1.61	-2.68	5	7	9	OC[C@H]([C@H]([C@@H]1OC(=C[C@@H]([C@H]1NC(=O)C)O)C(=O)O)O)O	0	C266H107N78O83S2+5	valid
1n1v	general	Protein-Ligand	2.1	Ki=140uM	Ki	3.85	2003	neuraminidase (sialidase)	DAN	O44049	C11H17NO8	291.255	291.095	37	37	156.55	-1.61	-2.68	5	7	9	OC[C@H]([C@H]([C@@H]1OC(=C[C@@H]([C@H]1NC(=O)C)O)C(=O)O)O)O	0	C272H107N79O84S3+5	train
1n2v	general	Protein-Ligand	2.1	Ki=83uM	Ki	4.08	2003	queuine tRNA-ribosyltransferase	BDI	P28720	C9H12N4O2	208.217	208.096	27	28	94.4	0.98	0.28	3	3	3	CCCCc1nc2c([nH]1)c(=O)[nH][nH]c2=O	0	C267H85N68O81S6+	train
1n3i	refined	Protein-Ligand	1.9	Ki=1.3nM	Ki	8.89	2003	purine nucleoside phosphorylase	DIH	P9WP01	C12H17N4O3	265.288	265.13	36	38	106.44	-1.06	-0.81	5	3	5	OC[C@H]1C[N@H+](C[C@@H]1O)Cc1c[nH]c2c1nc[nH]c2=O	0	C322H105N83O92S+2	train
1n3w	general	Protein-Ligand	2.6	Kd=110nM	Kd	6.96	2003	maltose binding periplasmic protein	MAL	P0AEX9	C12H22O11	342.296	342.116	45	46	189.53	-4.73	-5.4	8	8	12	OC[C@H]1O[C@H](O)[C@@H]([C@H]([C@@H]1O[C@H]1O[C@H](CO)[C@H]([C@@H]([C@H]1O)O)O)O)O	0	C318H93N74O79S2+4	train
1n3z	general	Protein-Ligand	1.65	Ki=63.2uM	Ki	4.2	2003	bovine seminal ribonuclease	U3P	P00669	C9H14N2O9P	325.189	325.044	35	36	188.06	-4.11	-3.17	3	7	5	OC[C@H]1O[C@H]([C@@H]([C@@H]1OP(O)(O)O)O)n1ccc(=O)[nH]c1=O	0	C193H72N55O52S3+9	train
1n43	general	Protein-Ligand	1.89	Kd~28pM	Kd	10.55	2003	streptavidin	BTN	P22629	C10H16N2O3S	244.311	244.088	32	33	103.73	1.78	1.45	2	3	4	OC(=O)CCCC[C@@H]1SC[C@H]2[C@@H]1NC(=O)N2	0	C270H79N72O77+4	train
1n46	refined	Protein-Ligand	2.2	Ki=0.03nM	Ki	10.52	2003	thyroid hormone receptor beta-1	PFA	P10828	C20H21N3O4	367.398	367.153	48	50	97.21	3.86	3.16	2	3	5	Cc1cc(cc(c1Oc1ccc(c(c1)C(C)C)O)C)n1ncc(=O)[nH]c1=O	0	C402H134N103O98S6+9	train
1n4h	refined	Protein-Ligand	2.1	Ki=0.28uM	Ki	6.55	2003	nuclear receptor ror-beta	REA	P45446 Q15788	C20H28O2	300.435	300.209	50	50	37.3	7.23	5.6	0	2	4	C/C(=C\C=C\C(=C\C(=O)O)\C)/C=C/C1=C(C)CCCC1(C)C	0	C403H130N97O101S9+8	train
1n4k	refined	Protein-Ligand	2.2	Kd=0.09nM	Kd	10.05	2002	inositol 1,4,5-trisphosphate receptor type 1	I3P	P11881	C6H18O15P3	423.119	422.986	42	42	311.22	-7.48	-4.8	3	12	6	O[C@@H]1[C@@H](OP(O)(O)O)[C@H](OP(O)(O)O)[C@H]([C@@H]([C@@H]1O)OP(O)(O)O)O	0	C156H57N55O53+9	train
1n51	refined	Protein-Ligand	2.3	Ki=14uM	Ki	4.85	2003	xaa-pro aminopeptidase	4-mer	P15034	C23H34N5O5	460.547	460.256	67	69	160.68	-0.55	-0.86	4	5	12	C[C@@H](C(=O)N)NC(=O)[C@@H]1CCCN1C(=O)[C@@H]1CCCN1C(=O)[C@H]([C@@H](Cc1ccccc1)[NH3+])O	1	C381H134Mn2N99O112S2+9	valid
1n5r	refined	Protein-Ligand	2.25	Ki=2.2uM	Ki	5.66	2003	acetylcholinesterase	PRM	P21836	C27H34N4	414.586	414.278	65	68	55.92	4.95	6.15	2	0	7	CC[N+](CCC[n+]1c(c2ccccc2)c2cc(N)ccc2c2c1cc(N)cc2)(CC)C	0	C285H84N65O72S+2	train
1n7i	general	Protein-Ligand	2.8	Ki=0.26uM	Ki	6.59	2003	phenylethanolamine n-methyltransferase	LY1	P11086	C10H12Cl2N	217.115	216.035	25	26	16.61	2.94	3.57	1	0	0	Clc1ccc2c(c1Cl)C[NH2+]CCC2	0	C308H94N67O79S2+2	train
1n7j	general	Protein-Ligand	2.7	Ki=0.37uM	Ki	6.43	2003	phenylethanolamine n-methyltransferase	IDI	P11086	C9H11IN	260.095	259.994	22	23	16.61	1.97	2.48	1	0	0	Ic1ccc2c(c1)C[NH2+]CC2	0	C304H95N67O79S2+2	train
1n7m	general	Protein-Ligand	1.8	Kd=1.96uM	Kd	5.71	2003	germline fab 7G12	NMP	P01857	C35H52N4O4	592.812	592.399	95	99	126.36	0.5	4.15	7	4	12	C=CC1=C(C)[C@H]2[NH2+][C@H]1/C=C/1\N[C@H](C(=C1C)CCC(O)O)CC1=N[C@H](C[C@@H]3[N@H+]([C@H](C2)C(=C3C)C=C)C)C(=C1CCC(O)O)C	0	C273H73N65O68S+4	train
1n7t	general	Protein-Ligand	NMR	IC50=0.15uM	IC50	6.82	2003	99-mer peptide of densin-180-like protein	7-mer	Q96RT1	C42H56N9O12	878.947	878.405	119	122	348.88	0.06	0.3	11	12	29	OC(=O)CC[C@@H](C(=O)N[C@H](C(=O)N[C@H](C(=O)N[C@H](C(=O)O)C(C)C)Cc1c[nH]c2c1cccc2)[C@H](O)C)NC(=O)[C@H](Cc1c[nH]c2c1cccc2)NC(=O)CNC(=O)[C@H]([C@H](O)C)[NH3+]	0	C245H79N65O65+6	train
1n8u	general	Protein-Ligand	1.8	Kd=0.93uM	Kd	6.03	2003	chemosensory protein	BDD	Q9NG96	C12H25BrO	265.23	264.109	39	38	20.23	4.98	4.27	1	1	12	OCCCCCCCCCCCCBr	0	C310H99N79O94S3+8	train
1n8v	general	Protein-Ligand	1.39	Kd=0.93uM	Kd	6.03	2003	chemosensory protein	BDD	Q9NG96	C12H25BrO	265.23	264.109	39	38	20.23	4.98	4.27	1	1	12	OCCCCCCCCCCCCBr	0	C283H95N70O86S3+5	train
1n95	general	Protein-Ligand	2.3	IC50=1.2nM	IC50	8.92	2003	farnesyltransferase alpha subunit	FTH	Q02293 Q04631	C31H29N6O	501.602	501.24	67	71	102.32	3.21	3.27	1	4	8	N#CC1=C(CN(CC1)C(=O)[C@H](Cc1cncn1C)[NH2+]Cc1ccc(cc1)C#N)c1cccc2c1cccc2	1	C408H118N105O109S6Zn+5	train
1n9m	general	Protein-Ligand	1.6	Kd~11pM	Kd	10.96	2003	streptavidin	BTN	P22629	C10H16N2O3S	244.311	244.088	32	33	103.73	1.78	1.45	2	3	4	OC(=O)CCCC[C@@H]1SC[C@H]2[C@@H]1NC(=O)N2	0	C270H77N70O74+4	train
1nax	general	Protein-Ligand	2.7	Ki=0.37uM	Ki	6.43	2003	Thyroid hormone receptor beta-1	IH5	P10828	C17H16Cl2O4	355.213	354.043	39	40	66.76	6.38	5.24	1	3	5	OC(=O)Cc1cc(Cl)c(c(c1)Cl)Oc1ccc(c(c1)C(C)C)O	0	C354H118N95O89S6+7	train
1nc1	refined	Protein-Ligand	2	Ki=0.75uM	Ki	6.12	2003	mta/sah nucleosidase	MTH	P0AF12	C12H16N4O3S	296.345	296.094	36	38	131.72	-0.56	0.58	3	4	5	CSC[C@H]1O[C@H]([C@@H]([C@@H]1O)O)n1ccc2c1ncnc2N	0	C321H126N82O103S2+4	valid
1nc3	refined	Protein-Ligand	2.2	Ki=10uM	Ki	5	2003	mta/sah nucleosidase	FMC	P0AF12	C10H13N5O4	267.241	267.097	32	34	150.4	-2.23	-1.33	5	6	5	OC[C@H]1O[C@H]([C@@H]([C@@H]1O)O)c1n[nH]c2c1ncnc2N	0	C273H112N73O89S2+4	valid
1nc6	general	Protein-Ligand	1.9	Ki=10nM	Ki	8	2003	trypsinogen	ABB	P00760	C20H32N6O4S	452.571	452.221	63	65	204.75	1.03	-1.97	4	5	13	O[C@@H]1C[C@H](N(C1)C(=O)C)[C@H]([NH2+][C@H]([C@@H](c1nc2c(s1)cccc2)O)CCC[NH+]=C(N)N)O	0	C290H97N76O87S5+4	train
1nd5	general	Protein-Ligand	2.9	IC50=4nM	IC50	8.4	2002	prostatic acid phosphatase	2BF	P15309	C14H18NO3P	279.271	279.102	37	38	90.89	-1.35	1.19	1	3	4	OP([C@H](c1ccccc1)[NH2+]Cc1ccccc1)(O)O	0	C278H92N70O75S+6	train
1nde	general	Protein-Ligand	3	Ki=15nM	Ki	7.82	2002	estrogen receptor beta	MON	Q92731	C24H30ClN6OS	486.053	485.189	63	66	116.08	5.48	4.7	3	4	11	Oc1ccc(cc1)CCNc1nc(SCCCc2ccc(cc2)Cl)nc(n1)N1CC[NH2+]CC1	0	C377H117N85O96S12+5	valid
1ndj	general	Protein-Ligand	1.81	Kd~0.69pM	Kd	12.16	2003	streptavidin	BTN	P22629	C10H16N2O3S	244.311	244.088	32	33	103.73	1.78	1.45	2	3	4	OC(=O)CCCC[C@@H]1SC[C@H]2[C@@H]1NC(=O)N2	0	C276H79N72O78+4	train
1ndv	refined	Protein-Ligand	2.3	Ki=1200nM	Ki	5.92	2003	adenosine deaminase	FR0	P56658	C16H16N7S2	370.475	370.091	41	44	176.09	4.66	2.82	2	2	5	NC(=[NH+]c1scc(n1)c1ccc(s1)CNc1nc2c([nH]1)cccc2)N	1	C351H117N91O99S5Zn+8	train
1ndw	refined	Protein-Ligand	2	Ki=5900nM	Ki	5.23	2003	adenosine deaminase	FR2	P56658	C14H17N3O2	259.304	259.132	36	37	81.14	0.82	1.85	2	3	7	OC[C@H](n1cnc(c1)C(=O)N)CCc1ccccc1	1	C269H97N76O78S3Zn+9	valid
1ndy	refined	Protein-Ligand	2	Ki=680nM	Ki	6.17	2003	adenosine deaminase	FR3	P56658	C18H19N3O2	309.362	309.148	42	44	81.14	2.07	3	2	3	7	OC[C@H](n1cnc(c1)C(=O)N)CCc1cccc2c1cccc2	1	C332H116N86O95S6Zn+8	train
1ndz	refined	Protein-Ligand	2	Ki=7.7nM	Ki	8.11	2003	adenosine deaminase	FR5	P56658	C27H29N7O3	499.564	499.233	66	70	132.99	1.19	3.79	3	5	12	OC[C@H](n1cnc(c1)C(=O)N)CCn1ccc2c1cc(cc2)NC(=O)CCc1nc2c(n1C)cccc2	1	C381H136N102O110S5Zn+7	train
1nf8	refined	Protein-Ligand	1.6	Kd=0.015uM	Kd	7.82	2003	phenazine biosynthesis protein phzd	ISC	P0DPC1	C10H10O6	226.183	226.048	26	26	104.06	2.56	-0.09	1	5	3	C=C(C(=O)O)O[C@H]1C=CC=C([C@@H]1O)C(=O)O	0	C288H87N75O66S4+9	valid
1nfu	refined	Protein-Ligand	2.05	Ki=18nM	Ki	7.74	2003	coagulation factor xa	RRP	P00742	C20H20ClN4O3S2	463.981	463.067	50	53	145.92	4.63	2.71	0	3	5	Clc1ccc2c(c1)sc(c2)S(=O)(=O)N1CCN(C(=O)C1)Cc1cccc(c1)C(=[NH2+])N	0	C290H106N76O91S6+6	train
1nfw	refined	Protein-Ligand	2.1	Ki=1.1nM	Ki	8.96	2003	coagulation factor xa	RRR	P00742	C18H17ClN4O3S2	436.936	436.043	45	48	122.99	2.06	3.88	1	4	5	O=C1CN(CCN1Cc1cc2c([nH]1)ccnc2)S(=O)(=O)/C=C/c1ccc(s1)Cl	0	C288H106N75O90S6+6	test
1nfx	refined	Protein-Ligand	2.15	Ki=3.0nM	Ki	8.52	2003	coagulation factor xa	RDR	P00742	C22H21ClN4O4S2	505.01	504.069	54	58	132.36	2.14	3.89	1	5	7	OCCn1c(CN2CCN(CC2=O)S(=O)(=O)c2cc3c(s2)cc(cc3)Cl)cc2c1ccnc2	0	C262H98N73O84S5+7	train
1nfy	refined	Protein-Ligand	2.1	Ki=1.3nM	Ki	8.89	2003	coagulation factor xa	RTR	P00742	C20H20ClN4O3S2	463.981	463.067	50	53	145.92	4.63	2.71	0	3	5	Clc1ccc2c(c1)sc(c2)S(=O)(=O)N1CCN(C(=O)C1)Cc1ccc(cc1)C(=[NH2+])N	0	C275H100N71O83S4+6	valid
1ngw	general	Protein-Ligand	2.6	Kd=20.7nM	Kd	7.68	2003	Fab 7g12	MMP	P06328	C34H44N4O4	572.738	572.336	86	90	137.76	8.58	6.07	4	4	6	CCc1c2Cc3[nH]c(c(c3C)CCC(=O)O)Cc3[nH]c(Cc4[nH]c(Cc(c1C)[nH]2)c(CC)c4C)c(c3CCC(=O)O)C	0	C258H78N60O66S3+3	train
1nh0	refined	Protein-Ligand	1.03	Ki=0.18nM	Ki	9.74	2004	retropepsin	5-mer	P03367	C37H43N5O11	733.764	733.296	96	98	263.55	4.45	3.06	6	10	25	O=C(N[C@H]([C@H](C(=O)N[C@H](C(=O)N[C@H](C(=O)N[C@H](C(=O)N)CCC(=O)O)CCC(=O)O)Cc1ccccc1)O)Cc1ccccc1)OCc1ccccc1	0	C299H102N83O86S+6	train
1nhg	general	Protein-Ligand	2.43	Ki=0.05uM	Ki	7.3	2003	Malarial Enoyl Acyl Carrier Protein Reductase	TCL	Q9BH77	C12H7Cl3O2	289.542	287.951	24	25	29.46	4.98	5.14	1	1	3	Clc1ccc(c(c1)O)Oc1ccc(cc1Cl)Cl	0	C270H106N69O74S+5	train
1nhu	refined	Protein-Ligand	2	Ki=2.2uM	Ki	5.66	2003	hepatitis c virus ns5b RNA polymerase	153	P26663	C24H18Cl2F3NO3	496.306	495.062	51	53	57.61	7.48	6.35	0	3	7	Clc1ccc(c(c1)Cl)C(=O)N([C@H](C(=O)O)Cc1ccccc1)Cc1cccc(c1)C(F)(F)F	0	C274H79N73O65S+8	train
1nhv	general	Protein-Ligand	2.9	Ki=2.2uM	Ki	5.66	2003	rna-dependent rna polymerase	154	P26663	C29H21Cl2NO4S	550.452	549.057	58	62	98.99	8.42	7.81	0	3	8	Clc1ccc(c(c1)Cl)C(=O)N([C@H](C(=O)O)Cc1ccccc1)Cc1ccc(s1)c1cc2c(o1)cccc2	0	C281H85N79O67S2+10	valid
1nhw	general	Protein-Ligand	2.35	Ki=14.3uM	Ki	4.84	2003	Malarial Enoyl Acyl Carrier Protein Reductase	TCC	Q9BH77	C12H9Cl2NO	254.112	253.006	25	26	32.26	4.36	4.52	2	1	3	Clc1ccc(c(c1)Cl)Nc1ccccc1O	0	C224H81N62O69S+5	test
1nhx	general	Protein-Ligand	2.1	IC50=2.11uM	IC50	5.68	2003	phosphoenolpyruvate carboxykinase, cytosolic	FTB	P35558	C25H26FN5O3	463.504	463.202	60	63	101.78	3.6	3.5	2	4	9	CCCCn1c2[nH]c(nc2c(=O)n(c1=O)Cc1ccccc1F)Cc1ccc(cc1)NC(=O)C	0	C280H85N77O73S3+7	train
1nhz	refined	Protein-Ligand	2.3	Ki=0.84uM	Ki	6.08	2003	human Glucocorticoid Receptor (N517D, F602S, C638D mutation)	486	P04150	C29H35NO2	429.594	429.267	67	71	40.54	3.77	5.41	1	2	4	CC#C[C@]1(O)CC[C@@H]2[C@]1(C)C[C@H](c1ccc(cc1)N(C)C)C1=C3CCC(=O)C=C3CC[C@@H]21	0	C331H98N81O81S11+4	train
1ni1	general	Protein-Ligand	2.3	IC50=0.90nM	IC50	9.05	2004	farnesyltransferase alpha subunit	2C5	Q02293 Q04631	C25H17Cl2N5O	474.341	473.081	50	53	87.52	4.51	5.84	0	4	6	N#Cc1ccc(cc1)[C@H](c1cncn1C)OCc1nc(Cl)c(cc1c1cccc(c1)Cl)C#N	1	C393H130N102O105S6Zn+7	test
1nj1	general	Protein-Ligand	2.55	Ki=25nM	Ki	7.6	2003	proline-trna synthetase	5CA	O26708	C13H20N7O7S2	450.471	450.087	49	51	266.6	-3.43	-2	5	8	11	SC[C@@H](C(=O)NS(=O)(=O)OC[C@H]1O[C@H]([C@@H]([C@@H]1O)O)n1cnc2c1ncnc2N)[NH3+]	0	C336H113N83O90S+9	test
1nj5	general	Protein-Ligand	2.8	Ki=50nM	Ki	7.3	2003	proline-trna synthetase	P5A	O26708	C15H22N7O7S	444.443	444.13	52	55	216.77	-2.72	-0.25	5	8	9	O[C@@H]1[C@@H](COS(=O)(=O)NC(=O)[C@@H]2CCC[NH2+]2)O[C@H]([C@@H]1O)n1cnc2c1ncnc2N	1	C336H119MgN89O98S+11	test
1nja	refined	Protein-Ligand	2.5	Kd=0.49uM	Kd	6.31	1996	thymidylate synthase	DCM	P00469	C9H15N3O7P	308.205	308.065	35	36	173.88	-3.46	-1.27	2	5	4	O[C@H]1C[C@@H](O[C@@H]1COP(O)(O)O)n1ccc(nc1=O)N	0	C347H114N84O75S3+7	valid
1njb	general	Protein-Ligand	2.75	Kd=1.6uM	Kd	5.8	1996	thymidylate synthase	UMP	P00469	C9H14N2O8P	309.19	309.049	34	35	167.83	-3.14	-2.14	2	6	4	O[C@H]1C[C@@H](O[C@@H]1COP(O)(O)O)n1ccc(=O)[nH]c1=O	0	C275H96N73O70S3+6	test
1njc	refined	Protein-Ligand	2.5	Kd=2.8uM	Kd	5.55	1996	thymidylate synthase	DCM	P00469	C9H15N3O7P	308.205	308.065	35	36	173.88	-3.46	-1.27	2	5	4	O[C@H]1C[C@@H](O[C@@H]1COP(O)(O)O)n1ccc(nc1=O)N	0	C307H106N85O80S+8	valid
1njd	refined	Protein-Ligand	2.5	Kd=2.7uM	Kd	5.57	1996	thymidylate synthase	UMP	P00469	C9H14N2O8P	309.19	309.049	34	35	167.83	-3.14	-2.14	2	6	4	O[C@H]1C[C@@H](O[C@@H]1COP(O)(O)O)n1ccc(=O)[nH]c1=O	0	C301H104N75O75S+5	train
1nje	refined	Protein-Ligand	2.3	Kd=160uM	Kd	3.8	1996	thymidylate synthase	DCM	P00469	C9H15N3O7P	308.205	308.065	35	36	173.88	-3.46	-1.27	2	5	4	O[C@H]1C[C@@H](O[C@@H]1COP(O)(O)O)n1ccc(nc1=O)N	0	C304H105N82O80S+5	valid
1njf	general	Protein-Ligand	2.3	Kd=0.62uM	Kd	6.21	2003	dna polymerase iii, gamma subunit	AGS	P06710	C10H19N5O12P3S	526.27	525.996	50	52	347.95	-5.01	-1.42	3	11	11	O[C@@H]1[C@@H](COP(OP(OP(S)(O)O)(O)O)(O)O)O[C@H]([C@@H]1O)n1cnc2c1ncnc2N	0	C270H94N80O78+10	valid
1njj	general	Protein-Ligand	2.45	Ki=8mM	Ki	2.1	2003	ornithine decarboxylase	GET	Q9TZZ6	C20H44N4O10	500.584	500.306	78	80	257.83	-5.75	-8.79	10	6	12	C[NH2+][C@@H]1[C@@H](O)[C@H](OC[C@]1(C)O)O[C@H]1[C@H]([NH3+])C[C@@H]([C@H]([C@@H]1O)O[C@H]1O[C@H]([C@@H](O)C)[C@H]([C@@H]([C@H]1[NH3+])O)O)[NH3+]	0	C217H75N62O66S2+7	test
1njs	refined	Protein-Ligand	1.98	Ki=15nM	Ki	7.82	2003	phosphoribosylglycinamide formyltransferase	KEU	P22102	C22H26F3N5O8	545.466	545.173	64	65	241.95	1.96	1.89	6	8	13	OC(=O)CC[C@@H](C(=O)O)NC(=O)c1ccc(cc1)[C@H](C(C(F)(F)F)(O)O)CCCc1c(N)nc([nH]c1=O)N	0	C285H94N78O78S4+4	test
1njt	general	Protein-Ligand	2.5	IC50=15uM	IC50	4.82	2003	capsid protein p40	6-mer	P16753	C22H39N5O8	501.574	501.28	74	73	194.24	0.01	-0.23	5	8	18	OC[C@@H](NC(=O)[C@@H](NC(=O)[C@H](C(C(=O)O)(C)C)NC(=O)[C@H](C(C)C)NC(=O)C)CC(=O)N(C)C)C	0	C199H69N63O59S2+8	train
1nki	refined	Protein-Ligand	0.95	Kd=0.2uM	Kd	6.7	2004	fosfomycin resistance protein	PPF	Q9I4K6	CH4O5P	127.013	126.98	11	10	111.58	-1.26	-0.6	0	5	0	OC(=O)P(O)(O)O	1	C225H64MnN58O58S+5	train
1nl4	general	Protein-Ligand	2.7	IC50=0.39nM	IC50	9.41	2003	farnesyltransferase alpha subunit	FTL	Q02293 Q04631	C30H23N5	453.537	453.195	58	62	68.64	5.47	6.19	0	3	6	N#Cc1cccc(c1)CN(c1ccc(c(c1)c1cccc2c1cccc2)C#N)Cc1cncn1C	1	C423H136N109O112S6Zn+7	train
1nl6	general	Protein-Ligand	2.8	Ki=4.8pM	Ki	11.32	2003	cathepsin k	750	P43235	C40H50N5O7	712.854	712.371	102	107	147.67	4.26	4.93	4	5	17	CC(C[C@@H](C(=O)N[C@H]1CCCN(C[C@@H]1O)C(=O)Cc1cccc(c1)c1ccccn1)NC(=O)c1cc2c(o1)ccc(c2)OCC[NH+]1CCOCC1)C	0	C244H71N66O78S4	train
1nl9	refined	Protein-Ligand	2.4	Ki=1.1uM	Ki	5.96	2003	tyrosine phosphatase 1b	989	P18031	C29H31N3O7	533.572	533.216	70	72	153.11	6.05	4.42	2	7	13	CCCCCNC(=O)[C@H](Cc1ccc(c2c1cccc2)N(c1ccccc1C(=O)O)C(=O)C(=O)O)NC(=O)C	0	C252H78N84O75S3+10	train
1nli	refined	Protein-Ligand	1.93	Kd=260uM	Kd	3.59	2003	trichosanthin alpha	ADE	P09989	C5H5N5	135.127	135.054	15	16	80.48	-0.25	0.52	2	3	0	Nc1ncnc2c1[nH]cn2	0	C210H77N56O59S2+3	valid
1nlj	general	Protein-Ligand	2.4	Ki=0.16nM	Ki	9.8	2003	cathepsin k	2CA	P43235	C26H32N4O6S	528.62	528.204	69	72	150.22	3.05	4.1	3	6	11	CC(C[C@@H](C(=O)N[C@H]1CCCN(C[C@@H]1O)S(=O)(=O)c1ccccn1)NC(=O)c1cc2c(o1)cccc2)C	0	C197H60N58O71S4	valid
1nlo	general	Protein-Ligand	NMR	Kd=3.4uM	Kd	5.47	1997	c-src tyrosine kinase	9-mer	P00523	C63H94N11O10	1165.49	1164.72	178	184	271.1	3.5	4.39	4	10	33	[NH3+]Cc1ccc(cc1)CN(C(=O)c1ccc(cc1)CN(C(=O)C)CC(C)C)CCC(=O)N1CCC(CC1)C(=O)N1CCC[C@H]1C(=O)N[C@H](C(=O)N1CCC[C@H]1C(=O)N1CCC[C@H]1C(=O)N[C@H](C(=O)N1CCC[C@H]1C(=O)N)CC(C)C)CC(C)C	0	C169H45N39O56+	train
1nlt	general	Protein-Ligand	2.7	Kd=12uM	Kd	4.92	2004	mitochondrial protein import protein mas5	7-mer	P25491	C42H59N8O11	851.965	851.43	120	122	312.86	0.49	1.3	10	11	32	[NH3+]CC(=O)N[C@H](C(=O)N[C@H](C(=O)N[C@H](C(=O)N[C@H](C(=O)N[C@H](C(=O)N[C@H](C=O)CO)[C@H](CC)C)CCC(=O)O)Cc1ccc(cc1)O)CC(C)C)Cc1c[nH]c2c1cccc2	0	C171H59N44O49+6	test
1nm6	refined	Protein-Ligand	1.8	Ki=0.09nM	Ki	10.05	2003	thrombin alpha	L86	P28504 P00734	C27H35ClN6O2	511.059	510.251	71	74	109.24	2.52	3.91	4	2	2	O=C1NCc2ccccc2CC[NH2+]CCC[NH2+]C[C@@H](Nc2c(=O)n(C1)c(Cl)cn2)Cc1ccccc1	0	C329H104N89O95S6+8	valid
1nmk	general	Protein-Ligand	2.1	IC50=5.7nM	IC50	8.24	2003	peptidyl-prolyl cis-trans isomerase a	SFM	P62937	C39H57N4O10	741.891	741.407	110	112	219.41	2.89	2.9	7	9	12	OC/C=C(/[C@@H]1C/C=C/C=C/[C@H](O)[C@H](C)[C@@H](O)[C@@H](CCC(=O)C)C(=O)N[C@H](C(=O)N[C@H](C(=O)N2[NH2+][C@H](C(=O)O1)CCC2)Cc1cccc(c1)O)C(C)C)\C	0	C254H82N81O74S4+8	valid
1nms	general	Protein-Ligand	1.7	Ki=0.2uM	Ki	6.7	2003	caspase-3	161	P42574	C20H20N2O9S	464.446	464.089	52	53	195.55	3.19	2.59	3	9	10	OC(=O)C[C@@H](C(=O)C)NC(=O)c1ccc(cc1)CNS(=O)(=O)c1ccc(c(c1)C(=O)O)O	0	C285H91N78O87S2+6	train
1nnb	general	Protein-Ligand	2.8	Ki=10uM	Ki	5	1994	neuraminidase	DAN	P03472	C11H17NO8	291.255	291.095	37	37	156.55	-1.61	-2.68	5	7	9	OC[C@H]([C@H]([C@@H]1OC(=C[C@@H]([C@H]1NC(=O)C)O)C(=O)O)O)O	0	C259H108N86O87+7	train
1nnk	general	Protein-Ligand	1.85	IC50=3.5uM	IC50	5.46	2003	glutamate receptor 2	CE2	P19491	C10H17N2O4	229.253	229.119	33	33	110.94	-1.04	-0.5	2	3	3	[NH3+][C@H](C(=O)O)Cc1c(o[nH]c1=O)C(C)(C)C	0	C341H105N78O94S4+5	valid
1nnu	general	Protein-Ligand	2.5	Ki=0.15uM	Ki	6.82	2003	Malarial Enoyl Acyl Carrier Protein Reductase	TCT	Q9BH77	C16H11ClO3	286.71	286.04	31	33	49.69	4.62	4.7	2	2	4	Clc1ccc(c(c1)O)Oc1ccc2c(c1)ccc(c2)O	0	C297H108N72O84S+4	test
1nny	refined	Protein-Ligand	2.4	Ki=22nM	Ki	7.66	2003	tyrosine phosphatase 1b	515	P18031	C40H37N3O10	719.736	719.248	90	94	199.64	8.86	6.33	2	9	16	CC(=O)N[C@H](C(=O)NCCCCCOc1cc2ccccc2cc1C(=O)O)Cc1ccc(c2c1cccc2)N(c1ccccc1C(=O)O)C(=O)C(=O)O	0	C330H104N103O95S6+12	valid
1no6	refined	Protein-Ligand	2.4	Ki=39uM	Ki	4.41	2003	tyrosine phosphatase 1b	794	P18031	C19H13NO5	335.31	335.079	38	40	94.91	5.31	3.29	0	5	3	OC(=O)C(=O)N(c1cccc2c1cccc2)c1ccccc1C(=O)O	0	C220H68N70O67S3+8	valid
1no9	general	Protein-Ligand	1.9	Ki=24nM	Ki	7.62	2003	thrombin alpha	4ND	P01050 P00734	C13H11NO	197.233	197.084	26	27	20.31	2.85	3.62	0	1	3	O=CN(c1ccccc1)c1ccccc1	0	C202H81N52O64S4+3	train
1noi	general	Protein-Ligand	2.5	Ki=700uM	Ki	3.15	1996	glycogen phosphorylase	NTZ	P00489	C6H10N4O4	202.168	202.07	24	25	124.52	-2.88	-3.02	4	7	5	OC[C@@H]1[C@@H](O)[C@H](O)[C@H](c2n1nnn2)O	0	C202H82N69O69S+7	valid
1noj	general	Protein-Ligand	2.4	Ki=700uM	Ki	3.15	1996	glycogen phosphorylase	NTZ	P00489	C6H10N4O4	202.168	202.07	24	25	124.52	-2.88	-3.02	4	7	5	OC[C@@H]1[C@@H](O)[C@H](O)[C@H](c2n1nnn2)O	0	C250H103N80O79+7	train
1nok	general	Protein-Ligand	2.4	Ki=700uM	Ki	3.15	1996	glycogen phosphorylase	NTZ	P00489	C6H10N4O4	202.168	202.07	24	25	124.52	-2.88	-3.02	4	7	5	OC[C@@H]1[C@@H](O)[C@H](O)[C@H](c2n1nnn2)O	0	C230H90N74O75S+6	train
1nox	general	Protein-Ligand	1.59	Kd=90nM	Kd	7.05	1997	nadh oxidase	FMN	Q60049	C17H22N4O9P	457.352	457.112	53	55	224.84	-2.56	-2	4	8	9	O=c1[nH]c(=O)c2c(n1)n(C[C@@H]([C@@H]([C@@H](COP(O)(O)O)O)O)O)c1c(n2)cc(c(c1)C)C	0	C321H94N90O75S+8	valid
1np0	refined	Protein-Ligand	2.5	Ki=270uM	Ki	3.57	2003	Human lysosomal beta-hexosaminidase isoform B	NGT	P07686	C8H13NO4S	219.258	219.057	27	28	107.58	-1.14	-1.61	3	3	4	OC[C@H]1O[C@@H]2SC(=N[C@@H]2[C@H]([C@@H]1O)O)C	0	C233H89N60O74S+5	valid
1npa	general	Protein-Ligand	2	IC50=2.0nM	IC50	8.7	2004	hiv-1 protease	3NH	P03366	C36H39N3O7	625.711	625.279	85	90	149.21	4.55	5.13	4	4	15	O=C(N[C@H]([C@H](C[C@@]1(NC=C(C1=O)[C@@H]1[C@H](OC(=O)N)Cc2c1cccc2)Cc1ccccc1)O)Cc1ccccc1)O[C@@H]1COCC1	0	C347H112N92O99S2+6	train
1npv	general	Protein-Ligand	2	IC50=5.7nM	IC50	8.24	2003	hiv-1 protease	L27	P03366	C35H37N3O6	595.685	595.268	81	86	125.99	4.19	4.48	4	4	13	O=C(N[C@H]([C@H](C[C@@]1(NC=C(C1=O)[C@@H]1CNC(=O)c2c1cccc2)Cc1ccccc1)O)Cc1ccccc1)O[C@@H]1COCC1	0	C344H109N92O97S2+6	train
1npw	general	Protein-Ligand	2	IC50=2.0nM	IC50	8.7	2003	hiv-1 protease	LGZ	P03366	C36H39N3O7	625.711	625.279	85	90	149.21	4.55	5.13	4	4	15	O=C(N[C@H]([C@H](C[C@@]1(NC=C(C1=O)[C@@H]1[C@H](OC(=O)N)Cc2c1cccc2)Cc1ccccc1)O)Cc1ccccc1)O[C@@H]1COCC1	0	C347H112N92O99S2+6	train
1npz	general	Protein-Ligand	2	Ki=13nM	Ki	7.89	2003	cathepsin s	C1P	P25774	C28H39N3O5S	529.691	529.261	76	78	113.19	3.92	5.23	2	4	15	CC(C[C@@H](C(=O)N[C@H](CCS(=O)(=O)c1ccccc1)CCc1ccccc1)NC(=O)N1CCOCC1)C	0	C238H65N65O65S4+3	train
1nq0	general	Protein-Ligand	2.4	IC50=0.048nM	IC50	10.32	2003	Thyroid hormone receptor beta-1	4HY	P10828	C14H9I3O4	621.932	621.764	30	31	66.76	5.95	4.63	1	3	4	OC(=O)Cc1cc(I)c(c(c1)I)Oc1ccc(c(c1)I)O	0	C339H116N92O85S6+8	train
1nq7	refined	Protein-Ligand	1.5	Ki=0.16uM	Ki	6.8	2003	nuclear receptor ror-beta	ARL	P45446 Q15788	C23H32O2	340.499	340.24	57	57	37.3	9.05	6.27	0	2	5	C/C(=C\C=C\C(=C\C(=O)O)\C)/c1cc(cc(c1)C(C)(C)C)C(C)(C)C	0	C403H129N97O105S9+7	train
1nqc	general	Protein-Ligand	1.8	Ki=50nM	Ki	7.3	2003	cathepsin s	C4P	P25774	C24H29N3O4S	455.57	455.188	61	63	113.04	2.22	2.98	2	3	13	O=C[C@@H](NC(=O)[C@@H](NC(=O)N1CCOCC1)Cc1ccccc1)CSCc1ccccc1	0	C256H72N70O75S5+3	train
1nt1	refined	Protein-Ligand	2	Ki=1.3nM	Ki	8.89	2003	thrombin alpha	T76	P28504 P00734	C25H33ClN4O5	505.006	504.214	68	71	116.84	2.49	2.84	3	4	1	O=C1NCCC(=O)N[C@H](C2CCCCC2)C(=O)N2[C@H](C(=O)NCc3c(OC1)ccc(c3)Cl)CCC2	0	C324H103N88O94S6+8	valid
1ntk	general	Protein-Ligand	2.6	Kd=32pM	Kd	10.49	2003	Mitochondrial Cytochrome bc1	AY1	P00125 P00126 P00129 P00130 P00157 P07552 P13271 P13272 P23004 P31800	C27H38N2O9	534.599	534.258	76	77	154.17	4.5	3.45	2	6	13	CCCCCC[C@H]1C(=O)O[C@H](C)[C@@H](C(=O)O[C@H]([C@@H]1OC(=O)C(C)C)C)NC(=O)C1=CCC=C(C1=O)NC=O	0	C387H118N95O90S3+5	train
1nu8	general	Protein-Ligand	2.5	Kd=3.8uM	Kd	5.42	2003	dipeptidyl peptidase iv	3-mer	P27487	C17H35N3O4	345.478	345.263	59	59	122.09	0.06	-1.05	3	4	10	CC[C@@H]([C@@H](C(=O)O)[NH2+][C@@H]([C@@H]1CCCN1C(=O)[C@H]([C@H](CC)C)[NH3+])O)C	0	C308H91N82O80S+6	train
1nvs	refined	Protein-Ligand	1.8	Ki=15nM	Ki	7.82	2003	serine/threonine-protein kinase chk1	UCM	O14757	C24H15N3O3	393.394	393.111	45	52	69.02	3.8	4.36	1	2	0	O=c1[nH]c(=O)c2c1c1c3c4c2c2ccccc2n4[C@@H]2O[C@H](n3c3c1cccc3)CC2	0	C289H85N66O84S+4	valid
1nw4	refined	Protein-Ligand	2.2	Kd=860pM	Kd	9.07	2004	uridine phosphorylase	IMH	Q8I3X4	C11H15N4O4	267.261	267.109	34	36	138.84	-2.3	-1.48	6	4	5	OC[C@H]1[NH2+][C@H]([C@@H]([C@@H]1O)O)c1c[nH]c2c1nc[nH]c2=O	0	C304H106N86O93S6+7	valid
1nw7	refined	Protein-Ligand	2.1	Kd=8.1uM	Kd	5.09	2003	DNA methyltransferase rsri	SAH	P14751	C14H21N6O5S	385.419	385.129	47	49	209.55	-3.47	-1.57	4	7	8	OC(=O)[C@H](CCSC[C@H]1O[C@H]([C@@H]([C@@H]1O)O)n1cnc2c1ncnc2N)[NH3+]	0	C303H105N71O86S4+3	train
1nwl	refined	Protein-Ligand	2.4	Ki=4.1mM	Ki	2.39	2003	tyrosine phosphatase 1b	964	P18031	C19H27N5O5S2	469.578	469.145	58	59	200.98	0.59	2.27	3	7	13	CC(=O)NCCSSCCNC(=O)[C@@H]1CC[C@@H](CC1)NC(=O)c1nccnc1C(=O)O	0	C288H94N89O86S4+10	train
1nxy	general	Protein-Ligand	1.6	Ki=64nM	Ki	7.19	2003	beta-lactamase tem	SM2	P62593	C14H14BNO5S	319.141	319.069	36	37	135.1	1.93	1.34	3	5	8	O=C(N[C@@H](c1cccc(c1)C(=O)O)B(O)O)Cc1cccs1	0	C106H40N36O40S2+3	train
1ny0	general	Protein-Ligand	1.75	Ki=1.4uM	Ki	5.85	2003	beta-lactamase tem	NBF	P62593	C14H16BNO4	273.092	273.117	36	37	78.79	1.73	1.79	3	3	8	CCOc1ccc2c(c1C(=O)NCB(O)O)cccc2	0	C216H76N56O71S4+4	valid
1ny2	general	Protein-Ligand	2.3	Ki=1.75mM	Ki	2.76	2003	thrombin light chain	5-mer	P01042 P28504 P00734	C18H33N7O5	427.499	427.254	63	64	200.67	-1.76	-3.42	2	5	11	NC(=[NH+]CCC[C@@H](C(=O)N1CCC[C@H]1C(=O)N1CCC[C@H]1C(=O)NCC(=O)O)[NH3+])N	0	C298H94N82O87S5+8	train
1nym	general	Protein-Ligand	1.2	Ki=4.0uM	Ki	5.4	2003	beta-lactamase tem	CXB	P62593	C7H11BN4O4S	258.063	258.059	28	28	158.3	-0.38	-0.41	4	4	8	CO/N=C(/c1csc(n1)N)\C(=O)NCB(O)O	0	C230H79N65O76S4+6	valid
1nyx	general	Protein-Ligand	2.65	IC50=0.092uM	IC50	7.04	2003	peroxisome proliferator activated receptor gamm	DRF	P37231	C25H25NO5	419.47	419.173	56	59	68.23	5.87	5.11	0	2	8	CCO[C@H](C(=O)O)Cc1ccc(cc1)OCCN1c2ccccc2Oc2c1cccc2	0	C388H127N87O87S6+5	test
1nyy	general	Protein-Ligand	1.9	Ki=21uM	Ki	4.68	2003	beta-lactamase tem	105	P62593	C12H12BClN2O4	294.499	294.058	32	33	95.59	1.28	1.85	3	4	7	OB(CNC(=O)c1c(C)onc1c1ccccc1Cl)O	0	C223H75N64O74S4+6	test
1nz7	refined	Protein-Ligand	2.4	Ki=0.076uM	Ki	7.12	2003	tyrosine phosphatase 1b	901	P18031	C32H40N4O10S	672.746	672.247	87	88	244.81	5.29	3.53	3	10	20	CSCC[C@@H](C(=O)O)NC(=O)CCCCNC(=O)[C@H](Cc1ccc(c(c1)CC)N(c1ccccc1C(=O)O)C(=O)C(=O)O)NC(=O)C	0	C341H106N104O94S7+14	train
1nzl	general	Protein-Ligand	1.9	Kd=0.07uM	Kd	7.15	2003	tyrosine-protein kinase transforming protein sr	8-mer	P00524	C47H70N9O20P2	1143.05	1142.42	148	151	496.23	-2.33	1	8	18	33	CC[C@@H]([C@@H](C(=O)N1CCC[C@H]1C(=O)N[C@H](C(=O)O)C)NC(=O)[C@H](Cc1ccc(cc1)OP(O)(O)O)NC(=O)[C@@H](NC(=O)[C@H](Cc1ccc(cc1)OP(O)(O)O)NC(=O)[C@@H](NC(=O)[C@@H]1CCC[NH2+]1)CCC(=O)N)CCC(=O)O)C	0	C255H81N78O70S2+11	test
1nzq	general	Protein-Ligand	2.18	IC50=11nM	IC50	7.96	2003	thrombin light chain	162	P00734	C23H36N6O4	460.57	460.28	69	71	159.86	1.49	-1.11	2	4	11	OC(=O)C[NH2+][C@@H](C(=O)N1CC=C[C@H]1C(=O)NCc1cn(c(c1)C(=[NH2+])N)C)CC1CCCCC1	0	C327H104N90O97S6+8	test
1nzv	general	Protein-Ligand	2.1	Kd=0.40uM	Kd	6.4	2003	tyrosine-protein kinase transforming protein sr	8-mer	P00524	C47H72N9O18P2	1113.07	1112.45	148	151	458.93	-2.3	1.79	8	16	32	CC[C@@H]([C@@H](C(=O)N[C@H](C(=O)N[C@H](C(=O)N1CCC[C@H]1C(=O)N[C@H](C(=O)O)C)C(C)C)Cc1ccc(cc1)OP(O)(O)O)NC(=O)[C@H](Cc1ccc(cc1)OP(O)(O)O)NC(=O)[C@@H](NC(=O)[C@@H]1CCC[NH2+]1)CCC(=O)N)C	0	C227H80N66O63S2+10	train
1o0d	general	Protein-Ligand	2.44	IC50=6.2nM	IC50	8.21	2003	thrombin light chain	163	P00734	C23H36N6O4	460.57	460.28	69	71	159.86	1.52	-1.11	2	4	11	O=C([C@@H]1C=CCN1C(=O)[C@@H](CC1CCCCC1)[NH2+]CC(=O)O)NCc1ccc(n1C)C(=[NH2+])N	0	C331H106N91O99S6+8	test
1o0f	refined	Protein-Ligand	1.5	Ki=5uM	Ki	5.3	2003	ribonuclease a	A3P	P61823	C10H17N5O10P2	429.217	429.045	44	46	266.1	-4.97	-2.04	2	10	5	O[C@@H]1[C@H](OP(O)(O)O)[C@H](O[C@H]1n1cnc2c1ncnc2N)COP(O)(O)O	0	C200H64N59O59S4+6	train
1o0h	refined	Protein-Ligand	1.2	Ki=1.2uM	Ki	5.92	2003	ribonuclease a	ADP	P61823	C10H17N5O10P2	429.217	429.045	44	46	266.1	-4.89	-2.04	3	10	7	O[C@@H]1[C@@H](COP(OP(O)(O)O)(O)O)O[C@H]([C@@H]1O)n1cnc2c1ncnc2N	0	C171H62N51O50S2+7	test
1o0m	refined	Protein-Ligand	1.5	Ki=7.1uM	Ki	5.15	2003	ribonuclease a	U2P	P61823	C9H14N2O9P	325.189	325.044	35	36	188.06	-3.56	-3.17	3	7	5	OC[C@H]1O[C@H]([C@@H]([C@@H]1O)OP(O)(O)O)n1ccc(=O)[nH]c1=O	0	C164H65N45O44S2+6	train
1o0n	refined	Protein-Ligand	1.5	Ki=82uM	Ki	4.09	2003	ribonuclease a	U3P	P61823	C9H14N2O9P	325.189	325.044	35	36	188.06	-4.11	-3.17	3	7	5	OC[C@H]1O[C@H]([C@@H]([C@@H]1OP(O)(O)O)O)n1ccc(=O)[nH]c1=O	0	C182H71N53O45S2+9	valid
1o0o	general	Protein-Ligand	1.2	Ki=8uM	Ki	5.1	2003	ribonuclease a	A2P	P61823	C10H17N5O10P2	429.217	429.045	44	46	266.1	-4.97	-2.04	2	10	5	O[C@@H]1[C@@H](COP(O)(O)O)O[C@H]([C@@H]1OP(O)(O)O)n1cnc2c1ncnc2N	0	C212H79N60O57S2+9	train
1o1s	refined	Protein-Ligand	2.3	Ki=49nM	Ki	7.31	2003	farnesyltransferase alpha subunit	1NH	Q02293 Q04631	C24H32O9P2	526.453	526.152	67	68	173.09	2.59	4.46	0	6	13	C/C(=C\CC/C(=C/COP(OP(O)(O)O)(O)O)/C)/COCc1cccc(c1)C(=O)c1ccccc1	1	C353H114N89O91S6Zn+6	train
1o2g	general	Protein-Ligand	1.58	Ki=0.76uM	Ki	6.12	2003	thrombin alpha	696	P28504 P00734	C21H18N3O	328.387	328.145	43	46	87.63	5.77	3.37	2	1	4	Oc1c(cccc1c1cc2c([nH]1)ccc(c2)C(=[NH2+])N)c1ccccc1	0	C296H102N74O85S5+5	train
1o2h	refined	Protein-Ligand	1.77	Ki=0.068uM	Ki	7.17	2003	trypsin beta	CR3	P00760	C20H22N3O2	336.408	336.171	47	50	96.86	5.38	3.03	2	1	5	Oc1c(cccc1c1cc2c([nH]1)ccc(c2)C(=[NH2+])N)OC1CCCC1	0	C273H96N69O81S6+4	train
1o2j	refined	Protein-Ligand	1.65	Ki=0.12uM	Ki	6.92	2003	trypsin beta	656	P00760	C18H21N4O2	325.385	325.166	45	47	109.75	4.88	2.14	2	2	6	CC(COc1cccc(c1O)c1nc2c([nH]1)ccc(c2)C(=[NH2+])N)C	0	C271H94N68O79S6+4	valid
1o2k	general	Protein-Ligand	1.63	Ki=0.12uM	Ki	6.92	2003	trypsin beta	656	P00760	C18H21N4O2	325.385	325.166	45	47	109.75	4.88	2.14	2	2	6	CC(COc1cccc(c1O)c1nc2c([nH]1)ccc(c2)C(=[NH2+])N)C	0	C258H91N67O78S5+4	valid
1o2n	refined	Protein-Ligand	1.5	Ki=0.81uM	Ki	6.09	2003	trypsin beta	762	P00760	C20H16ClN4O	363.82	363.101	42	45	100.52	5.84	3.42	2	2	4	Oc1c(cccc1c1ccccc1)c1[nH]c2c(n1)cc(c(c2)Cl)C(=[NH2+])N	0	C262H94N66O76S5+4	valid
1o2o	refined	Protein-Ligand	1.63	Ki=0.44uM	Ki	6.36	2003	trypsin beta	950	P00760	C18H20FN4O2	343.375	343.157	45	47	109.75	4.98	2.27	2	2	6	CC(COc1cccc(c1O)c1[nH]c2c(n1)cc(c(c2)F)C(=[NH2+])N)C	0	C280H99N70O82S6+4	train
1o2p	general	Protein-Ligand	1.47	Ki=14uM	Ki	4.85	2003	trypsin beta	972	P00760	C18H20ClN4O2	359.83	359.127	45	47	109.75	5.51	2.79	2	2	6	CC(COc1cccc(c1O)c1[nH]c2c(n1)cc(c(c2)Cl)C(=[NH2+])N)C	0	C244H86N62O72S5+4	test
1o2q	refined	Protein-Ligand	1.5	Ki=0.021uM	Ki	7.68	2003	trypsin beta	991	P00760	C20H21ClN3O2	370.853	370.132	47	50	96.86	6.01	3.68	2	1	5	Oc1c(cccc1c1[nH]c2c(c1)cc(c(c2)Cl)C(=[NH2+])N)OC1CCCC1	0	C287H102N71O84S6+4	train
1o2r	refined	Protein-Ligand	1.45	Ki=6.1uM	Ki	5.21	2003	trypsin beta	CR9	P00760	C21H24FN4O2	383.439	383.188	52	55	109.75	5.9	3.2	2	2	5	C[C@H]1CCCC[C@@H]1Oc1cccc(c1O)c1[nH]c2c(n1)cc(c(c2)F)C(=[NH2+])N	0	C283H102N71O84S6+4	test
1o2s	general	Protein-Ligand	1.65	Ki=3.4uM	Ki	5.47	2003	trypsin beta	CR4	P00760	C14H13N4O	253.279	253.109	32	34	100.52	3.58	1.1	2	2	3	Oc1ccccc1c1nc2c([nH]1)ccc(c2)C(=[NH2+])N	0	C219H79N59O66S5+4	train
1o2t	general	Protein-Ligand	1.62	Ki=0.014uM	Ki	7.85	2003	trypsin beta	783	P00760	C22H20N3O2	358.413	358.156	47	50	96.86	5.74	3.38	2	1	5	COc1cc(c2cc3c([nH]2)ccc(c3)C(=[NH2+])N)c(c(c1)c1ccccc1)O	0	C269H98N68O79S6+4	valid
1o2u	general	Protein-Ligand	1.41	Ki=1.4uM	Ki	5.85	2003	trypsin beta	847	P00760	C18H16BrN4O5	448.247	447.03	44	46	175.12	5.91	1.51	2	6	5	OC(=O)C[C@H](c1cc(Br)c(c(c1)c1nc2c([nH]1)ccc(c2)C(=[NH2+])N)O)C(=O)O	0	C253H87N66O76S5+4	train
1o2v	general	Protein-Ligand	1.5	Ki=1.4uM	Ki	5.85	2003	trypsin beta	847	P00760	C18H16BrN4O5	448.247	447.03	44	46	175.12	5.91	1.51	2	6	5	OC(=O)C[C@H](c1cc(Br)c(c(c1)c1nc2c([nH]1)ccc(c2)C(=[NH2+])N)O)C(=O)O	0	C256H86N66O77S5+4	valid
1o2w	refined	Protein-Ligand	1.38	Ki=1.4uM	Ki	5.85	2003	trypsin beta	847	P00760	C18H16BrN4O5	448.247	447.03	44	46	175.12	5.91	1.51	2	6	5	OC(=O)C[C@H](c1cc(Br)c(c(c1)c1nc2c([nH]1)ccc(c2)C(=[NH2+])N)O)C(=O)O	0	C258H90N67O77S6+4	test
1o2x	general	Protein-Ligand	1.46	Ki=1.4uM	Ki	5.85	2003	trypsin beta	847	P00760	C18H16BrN4O5	448.247	447.03	44	46	175.12	5.91	1.51	2	6	5	OC(=O)C[C@H](c1cc(Br)c(c(c1)c1nc2c([nH]1)ccc(c2)C(=[NH2+])N)O)C(=O)O	0	C271H93N68O78S5+4	valid
1o2y	general	Protein-Ligand	1.45	Ki=1.4uM	Ki	5.85	2003	trypsin beta	847	P00760	C18H16BrN4O5	448.247	447.03	44	46	175.12	5.91	1.51	2	6	5	OC(=O)C[C@H](c1cc(Br)c(c(c1)c1nc2c([nH]1)ccc(c2)C(=[NH2+])N)O)C(=O)O	0	C258H90N67O77S6+4	valid
1o2z	refined	Protein-Ligand	1.65	Ki=0.78uM	Ki	6.11	2003	trypsin beta	312	P00760	C25H23N4O6	475.473	475.162	58	61	184.35	6.82	2.42	2	6	7	COc1ccccc1c1cc(cc(c1O)c1nc2c([nH]1)ccc(c2)C(=[NH2+])N)[C@H](C(=O)O)CC(=O)O	0	C280H102N70O81S5+4	train
1o30	refined	Protein-Ligand	1.55	Ki=0.17uM	Ki	6.77	2003	trypsin beta	693	P00760	C24H20FN4O5	463.438	463.142	54	57	175.12	6.95	2.55	2	6	6	OC(=O)C[C@H](c1cc(c2nc3c([nH]2)ccc(c3)C(=[NH2+])N)c(c(c1)c1ccccc1F)O)C(=O)O	0	C261H92N68O80S5+4	train
1o32	general	Protein-Ligand	1.78	Ki=1.8uM	Ki	5.74	2003	trypsin beta	801	P00760	C13H12N5O	254.267	254.104	31	33	113.41	2.55	0.5	2	3	3	Oc1cccnc1c1nc2c([nH]1)ccc(c2)C(=[NH2+])N	0	C221H80N59O66S4+4	train
1o33	refined	Protein-Ligand	1.46	Ki=1.8uM	Ki	5.74	2003	trypsin beta	801	P00760	C13H12N5O	254.267	254.104	31	33	113.41	2.55	0.5	2	3	3	Oc1cccnc1c1nc2c([nH]1)ccc(c2)C(=[NH2+])N	0	C210H75N57O64S4+4	valid
1o34	general	Protein-Ligand	1.5	Ki=1.8uM	Ki	5.74	2003	trypsin beta	801	P00760	C13H12N5O	254.267	254.104	31	33	113.41	2.55	0.5	2	3	3	Oc1cccnc1c1nc2c([nH]1)ccc(c2)C(=[NH2+])N	0	C231H79N60O69S5+4	train
1o35	refined	Protein-Ligand	1.41	Ki=10uM	Ki	5	2003	trypsin beta	802	P00760	C14H12FN4O	271.27	271.1	32	34	100.52	3.68	1.24	2	2	3	Fc1ccc(c(c1)c1nc2c([nH]1)ccc(c2)C(=[NH2+])N)O	0	C210H75N57O64S4+4	valid
1o36	refined	Protein-Ligand	1.7	Ki=1.1uM	Ki	5.96	2003	trypsin beta	607	P00760	C24H20N5O7	490.445	490.136	56	59	220.94	6.68	2.84	2	8	6	OC(=O)C[C@H](c1cc(c2nc3c([nH]2)ccc(c3)C(=[NH2+])N)c(c(c1)c1ccccc1N(=O)=O)O)C(=O)O	0	C288H101N71O85S6+4	train
1o37	general	Protein-Ligand	1.45	Ki=0.15uM	Ki	6.82	2003	trypsin beta	653	P00760	C22H23N5O	373.451	373.19	51	54	128.16	4.53	1.55	3	2	6	[NH3+]CCc1cc(c2nc3c([nH]2)ccc(c3)C(=[NH2+])N)c(c(c1)c1ccccc1)O	0	C265H94N67O77S6+4	test
1o38	refined	Protein-Ligand	1.38	Ki=0.15uM	Ki	6.82	2003	trypsin beta	653	P00760	C22H23N5O	373.451	373.19	51	54	128.16	4.53	1.55	3	2	6	[NH3+]CCc1cc(c2nc3c([nH]2)ccc(c3)C(=[NH2+])N)c(c(c1)c1ccccc1)O	0	C257H89N65O75S5+4	test
1o39	general	Protein-Ligand	1.59	Ki=0.074uM	Ki	7.13	2003	trypsin beta	780	P00760	C20H17N4O	329.375	329.14	42	45	100.52	5.21	2.77	2	2	4	Oc1c(cccc1c1nc2c([nH]1)ccc(c2)C(=[NH2+])N)c1ccccc1	0	C266H96N67O78S5+4	train
1o3b	general	Protein-Ligand	1.75	Ki=0.074uM	Ki	7.13	2003	trypsin beta	780	P00760	C20H17N4O	329.375	329.14	42	45	100.52	5.21	2.77	2	2	4	Oc1c(cccc1c1nc2c([nH]1)ccc(c2)C(=[NH2+])N)c1ccccc1	0	C266H96N67O78S5+4	train
1o3c	general	Protein-Ligand	1.64	Ki=0.074uM	Ki	7.13	2003	trypsin beta	780	P00760	C20H17N4O	329.375	329.14	42	45	100.52	5.21	2.77	2	2	4	Oc1c(cccc1c1nc2c([nH]1)ccc(c2)C(=[NH2+])N)c1ccccc1	0	C266H96N67O78S5+4	train
1o3d	refined	Protein-Ligand	1.33	Ki=0.074uM	Ki	7.13	2003	trypsin beta	780	P00760	C20H17N4O	329.375	329.14	42	45	100.52	5.21	2.77	2	2	4	Oc1c(cccc1c1nc2c([nH]1)ccc(c2)C(=[NH2+])N)c1ccccc1	0	C269H98N68O79S6+4	test
1o3e	general	Protein-Ligand	1.64	Ki=0.011uM	Ki	7.96	2003	trypsin beta	696	P00760	C21H18N3O	328.387	328.145	43	46	87.63	5.77	3.37	2	1	4	Oc1c(cccc1c1cc2c([nH]1)ccc(c2)C(=[NH2+])N)c1ccccc1	0	C254H87N65O75S6+4	valid
1o3f	refined	Protein-Ligand	1.55	Ki=0.011uM	Ki	7.96	2003	trypsin beta	696	P00760	C21H18N3O	328.387	328.145	43	46	87.63	5.77	3.37	2	1	4	Oc1c(cccc1c1cc2c([nH]1)ccc(c2)C(=[NH2+])N)c1ccccc1	0	C266H96N67O78S5+4	valid
1o3g	general	Protein-Ligand	1.55	Ki=0.011uM	Ki	7.96	2003	trypsin beta	696	P00760	C21H18N3O	328.387	328.145	43	46	87.63	5.77	3.37	2	1	4	Oc1c(cccc1c1cc2c([nH]1)ccc(c2)C(=[NH2+])N)c1ccccc1	0	C266H96N67O78S5+4	train
1o3h	general	Protein-Ligand	1.53	Ki=0.05uM	Ki	7.3	2003	trypsin beta	907	P00760	C16H15BrN3O	345.214	344.04	36	38	87.63	5.2	2.78	2	1	3	Cc1cc(Br)c(c(c1)c1cc2c([nH]1)ccc(c2)C(=[NH2+])N)O	0	C255H88N64O75S5+4	train
1o3i	refined	Protein-Ligand	1.51	Ki=0.05uM	Ki	7.3	2003	trypsin beta	907	P00760	C16H15BrN3O	345.214	344.04	36	38	87.63	5.2	2.78	2	1	3	Cc1cc(Br)c(c(c1)c1cc2c([nH]1)ccc(c2)C(=[NH2+])N)O	0	C242H90N61O75S5+3	train
1o3j	refined	Protein-Ligand	1.4	Ki=0.17uM	Ki	6.77	2003	trypsin beta	334	P00760	C15H14BrN4O	346.202	345.035	35	37	100.52	4.64	2.17	2	2	3	Cc1cc(Br)c(c(c1)c1nc2c([nH]1)ccc(c2)C(=[NH2+])N)O	0	C243H85N62O72S4+4	train
1o3k	general	Protein-Ligand	1.43	Ki=0.17uM	Ki	6.77	2003	trypsin beta	334	P00760	C15H14BrN4O	346.202	345.035	35	37	100.52	4.64	2.17	2	2	3	Cc1cc(Br)c(c(c1)c1nc2c([nH]1)ccc(c2)C(=[NH2+])N)O	0	C255H88N64O75S5+4	train
1o3l	refined	Protein-Ligand	1.4	Ki=0.29uM	Ki	6.54	2003	trypsin beta	678	P00760	C17H15BrN3O3	389.223	388.03	39	41	124.93	5.74	2.09	2	3	4	OC(=O)Cc1cc(Br)c(c(c1)c1cc2c([nH]1)ccc(c2)C(=[NH2+])N)O	0	C266H91N67O78S5+4	train
1o3p	general	Protein-Ligand	1.81	Ki=0.22uM	Ki	6.66	2003	urokinase-type plasminogen activator	655	P00749	C19H21N4O2	337.396	337.166	46	49	109.75	4.82	2.42	2	2	5	Oc1c(cccc1c1nc2c([nH]1)ccc(c2)C(=[NH2+])N)OC1CCCC1	0	C285H102N72O80S5+6	train
1o41	general	Protein-Ligand	1.7	IC50=0.9mM	IC50	3.05	2004	proto-oncogene tyrosine-protein kinase src	300	P12931	C8H12O6P	235.151	235.037	27	27	112.97	-0.82	0.22	1	4	4	OCc1cccc(c1OP(O)(O)O)OC	0	C147H48N45O44S+7	valid
1o42	general	Protein-Ligand	1.7	IC50=9nM	IC50	8.05	2004	proto-oncogene tyrosine-protein kinase src	843	P12931	C30H35N3O7P	580.589	580.221	76	79	162.02	2.58	3.85	2	6	11	CC(=O)N[C@H](C(=O)N[C@H]1CCCCN(C1=O)Cc1ccc(cc1)c1ccccc1)Cc1ccc(cc1)OP(O)(O)O	0	C196H68N59O59S2+8	train
1o43	general	Protein-Ligand	1.5	IC50=2.2uM	IC50	5.66	2004	proto-oncogene tyrosine-protein kinase src	821	P12931	C33H35N3O6	569.647	569.253	77	80	136.04	4.56	4.37	3	6	12	OCc1cc(ccc1CC(=O)O)/C=C(/C(=O)N[C@H]1CCCCN(C1=O)Cc1ccc(cc1)c1ccccc1)\NC(=O)C	0	C220H76N64O61S2+9	test
1o44	general	Protein-Ligand	1.7	IC50=3nM	IC50	8.52	2004	proto-oncogene tyrosine-protein kinase src	852	P12931	C34H35N3O9	629.656	629.237	81	84	190.41	6.36	3.77	2	9	11	CC(=O)N[C@H](C(=O)N[C@H]1CCCCN(C1=O)Cc1ccc(cc1)c1ccccc1)Cc1ccc(c(c1)C(=O)O)C(C(=O)O)C(=O)O	0	C243H78N72O67S2+11	train
1o45	general	Protein-Ligand	1.8	IC50=0.25nM	IC50	9.6	2004	proto-oncogene tyrosine-protein kinase src	687	P12931	C31H37N3O8P	610.615	610.232	80	83	182.25	1.7	3.34	3	7	13	OCc1cc(ccc1OP(O)(O)O)C[C@@H](C(=O)N[C@H]1CCCCN(C1=O)Cc1ccc(cc1)c1ccccc1)NC(=O)C	0	C190H67N53O51S2+7	test
1o46	general	Protein-Ligand	2	IC50=10nM	IC50	8	2004	proto-oncogene tyrosine-protein kinase src	903	P12931	C35H36FN3O9	661.673	661.244	84	87	179.41	5.55	3.94	2	8	13	COC(=O)c1cc(ccc1C(C(=O)O)(C(=O)O)F)C[C@@H](C(=O)N[C@H]1CCCCN(C1=O)Cc1ccc(cc1)c1ccccc1)NC(=O)C	0	C200H67N55O57S2+7	train
1o47	general	Protein-Ligand	1.8	IC50=4nM	IC50	8.4	2004	proto-oncogene tyrosine-protein kinase src	822	P12931	C31H35F2N3O6P	614.597	614.223	78	81	152.79	2.96	4.61	2	6	11	CC(=O)N[C@H](C(=O)N[C@H]1CCCCN(C1=O)Cc1ccc(cc1)c1ccccc1)Cc1ccc(cc1)C(P(O)(O)O)(F)F	0	C196H65N61O56S2+10	train
1o48	general	Protein-Ligand	1.55	IC50=450nM	IC50	6.35	2004	proto-oncogene tyrosine-protein kinase src	853	P12931	C33H35N3O7	585.647	585.248	78	81	153.11	5.92	4.14	2	7	11	CC(=O)N[C@H](C(=O)N[C@H]1CCCCN(C1=O)Cc1ccc(cc1)c1ccccc1)Cc1ccc(c(c1)C(=O)O)CC(=O)O	0	C195H64N60O48S2+10	train
1o49	general	Protein-Ligand	1.7	IC50=437nM	IC50	6.36	2004	proto-oncogene tyrosine-protein kinase src	493	P12931	C32H37N3O9P	638.625	638.227	82	85	199.32	2.73	2.65	2	8	12	OC(=O)COc1ccc(cc1P(O)(O)O)C[C@@H](C(=O)N[C@H]1CCCCN(C1=O)Cc1ccc(cc1)c1ccccc1)NC(=O)C	0	C164H56N50O49S2+7	train
1o4a	general	Protein-Ligand	1.5	IC50=120nM	IC50	6.92	2004	proto-oncogene tyrosine-protein kinase src	197	P12931	C32H35N3O6	557.637	557.253	76	79	136.04	4.13	4.01	3	6	12	OCc1cc(ccc1C(=O)O)C[C@@H](C(=O)N[C@H]1CCCCN(C1=O)Cc1ccc(cc1)c1ccccc1)NC(=O)C	0	C230H73N66O66S2+9	train
1o4b	general	Protein-Ligand	1.85	IC50=2uM	IC50	5.7	2004	proto-oncogene tyrosine-protein kinase src	876	P12931	C30H37N3O9P2	645.577	645.201	81	84	227.07	0.15	1.55	2	9	10	CC(=O)N[C@H](C(=O)N[C@H]1CCCCN(C1=O)Cc1ccc(cc1)c1ccccc1)Cc1ccc(c(c1)P(O)(O)O)P(O)(O)O	0	C230H74N67O65S2+10	valid
1o4d	general	Protein-Ligand	1.85	IC50=0.3mM	IC50	3.52	2004	proto-oncogene tyrosine-protein kinase src	262	P12931	C7H10O5P	205.125	205.027	23	23	103.74	-0.79	0.21	1	4	3	OCc1ccccc1OP(O)(O)O	0	C131H46N41O39S+6	train
1o4e	general	Protein-Ligand	2	IC50=0.5mM	IC50	3.3	2004	proto-oncogene tyrosine-protein kinase src	299	P12931	C9H14O6P	249.178	249.053	30	30	123.97	-1.31	0.01	2	5	5	OCc1cc(C)cc(c1OP(O)(O)O)CO	0	C137H47N43O40S+7	train
1o4f	general	Protein-Ligand	2	IC50=0.3mM	IC50	3.52	2004	proto-oncogene tyrosine-protein kinase src	790	P12931	C9H13NO4P	230.178	230.058	28	29	95.54	0.47	1.22	1	3	1	OP(Oc1cccc2c1NCCC2)(O)O	0	C127H46N41O37S+7	train
1o4h	general	Protein-Ligand	2.25	IC50=3.6mM	IC50	2.44	2004	proto-oncogene tyrosine-protein kinase src	772	P12931	C10H8N2O4P	251.155	251.022	25	26	120.19	0.42	1.14	0	5	1	N#Cc1ccc2c(n1)c(ccc2)OP(O)(O)O	0	C107H37N33O37S+4	train
1o4i	general	Protein-Ligand	1.75	IC50=2.3mM	IC50	2.64	2004	proto-oncogene tyrosine-protein kinase src	219	P12931	C14H22O5P	301.295	301.12	42	43	92.74	2.2	2.82	1	3	7	OCc1ccccc1OP(OCC1CCCCC1)(O)O	0	C143H50N44O41S+7	valid
1o4j	general	Protein-Ligand	1.7	IC50=4.4mM	IC50	2.36	2004	proto-oncogene tyrosine-protein kinase src	IS2	P12931	C9H13NO4P	230.178	230.058	28	28	103.38	0.2	1.59	1	4	3	CCc1ccc(cc1)NC(=O)P(O)(O)O	0	C133H47N42O37S+7	test
1o4k	general	Protein-Ligand	1.57	IC50=1.2mM	IC50	2.92	2004	proto-oncogene tyrosine-protein kinase src	PSN	P12931	C14H16O5P	295.248	295.074	36	37	92.74	1.32	2.44	1	3	7	OCc1ccccc1OP(OCc1ccccc1)(O)O	0	C143H50N44O41S+7	train
1o4o	general	Protein-Ligand	1.7	IC50=3.5mM	IC50	2.46	2004	proto-oncogene tyrosine-protein kinase src	HPS	P12931	C6H8O4P	175.099	175.016	19	19	83.51	0.1	0.72	0	3	1	OP(Oc1ccccc1)(O)O	0	C108H30N34O33S+4	train
1o4p	general	Protein-Ligand	1.9	IC50=2.5mM	IC50	2.6	2004	proto-oncogene tyrosine-protein kinase src	791	P12931	C9H8O4	180.157	180.042	21	21	74.6	3.27	0.94	0	4	1	OC(=O)C(c1ccccc1)C(=O)O	0	C132H46N42O39S+7	train
1o4q	general	Protein-Ligand	1.7	IC50=3.2mM	IC50	2.49	2004	proto-oncogene tyrosine-protein kinase src	256	P12931	C8H10O5S	218.227	218.025	24	24	123.29	1.37	2.04	0	5	1	OC(=O)[C@H](S(O)(O)O)c1ccccc1	0	C137H47N43O40S+7	train
1o4r	general	Protein-Ligand	1.5	IC50=3.9mM	IC50	2.41	2004	proto-oncogene tyrosine-protein kinase src	787	P12931	C7H12O6P2	254.114	254.011	27	27	148.56	-2.13	0.16	0	6	1	OP(C(P(O)(O)O)c1ccccc1)(O)O	0	C142H48N44O41S+7	valid
1o5a	refined	Protein-Ligand	1.68	Ki=0.38uM	Ki	6.42	2004	urokinase-type plasminogen activator	696	P00749	C21H18N3O	328.387	328.145	43	46	87.63	5.77	3.37	2	1	4	Oc1c(cccc1c1cc2c([nH]1)ccc(c2)C(=[NH2+])N)c1ccccc1	0	C320H115N78O89S5+6	test
1o5b	general	Protein-Ligand	1.85	Ki=1.7uM	Ki	5.77	2004	urokinase-type plasminogen activator	ESI	P00749	C9H8IN2S	303.143	302.945	21	22	79.85	4.41	1.67	0	0	1	Ic1cccc2c1cc(s2)C(=[NH2+])N	0	C224H91N61O66S5+6	train
1o5c	refined	Protein-Ligand	1.63	Ki=6.0uM	Ki	5.22	2004	urokinase-type plasminogen activator	CR9	P00749	C21H24FN4O2	383.439	383.188	52	55	109.75	5.9	3.2	2	2	5	C[C@@H]1CCCC[C@@H]1Oc1cccc(c1O)c1[nH]c2c(n1)cc(c(c2)F)C(=[NH2+])N	0	C333H122N83O94S5+7	train
1o5e	refined	Protein-Ligand	1.75	Ki=1.8uM	Ki	5.74	2004	serine protease hepsin	132	P05981	C21H17ClN3O	362.832	362.106	43	46	87.63	6.4	4.03	2	1	4	Oc1c(cccc1c1ccccc1)c1[nH]c2c(c1)cc(c(c2)Cl)C(=[NH2+])N	0	C305H100N80O82S5+6	train
1o5f	general	Protein-Ligand	1.78	Ki=0.85uM	Ki	6.07	2004	serine protease hepsin	CR9	P05981	C21H24FN4O2	383.439	383.188	52	55	109.75	5.9	3.2	2	2	5	C[C@@H]1CCCC[C@@H]1Oc1cccc(c1O)c1[nH]c2c(n1)cc(c(c2)F)C(=[NH2+])N	0	C294H97N81O82S5+5	test
1o5g	refined	Protein-Ligand	1.75	Ki=11uM	Ki	4.96	2004	prothrombin	CR9	P28511 P00734	C21H24FN4O2	383.439	383.188	52	55	109.75	5.9	3.2	2	2	5	C[C@H]1CCCC[C@H]1Oc1cccc(c1O)c1[nH]c2c(n1)cc(c(c2)F)C(=[NH2+])N	0	C297H98N75O87S5+5	valid
1o5m	general	Protein-Ligand	2.3	IC50=1.9nM	IC50	8.72	2003	farnesyltransferase alpha subunit	336	Q02293 Q04631	C27H31Br2ClN4O2	638.822	636.05	67	71	79.53	4.75	6.49	1	3	5	Clc1cc(Br)c2c(c1)CCc1c([C@@H]2C2CCN(CC2)C(=O)CC2CCN(CC2)C(=O)N)ncc(c1)Br	1	C370H115N93O100S6Zn+7	test
1o5p	general	Protein-Ligand	NMR	Kd=0.1nM	Kd	10	2003	neocarzinostatin	CHR	P0A3R9	C35H34NO12	660.644	660.208	82	88	179.35	2.03	0.36	4	5	11	C[NH2+][C@H]1[C@H](O[C@@H]([C@@H]([C@@H]1O)O)C)O[C@H]1[C@@H](C=C2/C/1=C\C#C[C@@H]1[C@](C#C2)(O1)[C@H]1COC(=O)O1)OC(=O)c1c(O)ccc2c1cc(OC)cc2C	0	C241H79N59O77S3	valid
1o5r	refined	Protein-Ligand	2.35	Ki=7.5nM	Ki	8.12	2004	adenosine deaminase	FR9	P56658	C24H26N6O3	446.502	446.207	59	62	127.2	1.07	4.05	4	4	12	OC[C@H](n1cnc(c1)C(=O)N)CCn1ccc2c1cc(cc2)NC(=O)NCc1ccccc1	1	C368H117N93O100S6Zn+7	train
1o6h	general	Protein-Ligand	2.8	IC50=186nM	IC50	6.73	2003	squalene-hopene cyclase	W37	P33247	C25H30BrN2O	454.423	453.154	59	61	26.56	6.54	5.3	1	1	11	C=CC[N@H+](CCCCCCOc1ccc2c(c1)ccnc2c1ccc(cc1)Br)C	0	C523H168N116O134S2+5	train
1o6i	general	Protein-Ligand	1.7	Ki=0.65mM	Ki	3.19	2003	chitinase b	0HZ	P11797	C5H10NO	100.139	100.076	17	17	33.68	-0.15	0.48	1	1	1	O=C[C@H]1CCC[NH2+]1	0	C250H71N56O67S2+	train
1o6q	general	Protein-Ligand	2.8	IC50=23nM	IC50	7.64	2003	squalene-hopene cyclase	R17	P33247	C22H23BrNO2	413.328	412.091	49	51	26.81	5.6	4.5	1	0	8	C=CC[N@@H+](C/C=C/COc1ccc2c(c1)occ2c1ccc(cc1)Br)C	0	C466H156N105O125S3+4	test
1o6r	general	Protein-Ligand	2.7	IC50=80nM	IC50	7.1	2003	squalene-hopene cyclase	R19	P33247	C24H29BrNO2	443.397	442.138	57	59	26.81	6.72	5.5	1	0	11	C=CC[N@H+](CCCCCCOc1ccc2c(c1)occ2c1ccc(cc1)Br)C	0	C515H155N116O133S2+5	test
1o79	general	Protein-Ligand	2.8	IC50=406nM	IC50	6.39	2003	squalene-hopene cyclase	R23	P33247	C26H34ClN2O2	442.013	441.231	65	68	33.98	6.01	6.64	1	1	7	CN(C(=O)Oc1ccc(cc1)Cl)[C@@H]1CC[C@H](CC1)c1ccc(cc1)C[NH+]1CCCCC1	0	C519H162N117O141S2+5	train
1o7o	refined	Protein-Ligand	1.97	Kd=0.032mM	Kd	4.49	2003	n-acetyllactosaminide	UDP	P14769	C9H16N2O12P2	406.177	406.018	41	42	251.34	-5.29	-3.49	3	9	7	O[C@@H]1[C@@H](COP(OP(O)(O)O)(O)O)O[C@H]([C@@H]1O)n1ccc(=O)[nH]c1=O	1	C359H111MnN97O91S6+9	train
1o86	refined	Protein-Ligand	2	Ki=0.27nM	Ki	9.57	2003	angiotensin converting enzyme	LPR	P12821	C21H33N3O5	407.504	407.242	62	63	139.16	-1.24	-0.57	2	5	11	[NH3+]CCCC[C@@H](C(=O)N1CCC[C@H]1C(=O)O)[NH2+][C@H](C(=O)O)CCc1ccccc1	1	C371H146N99O106S3Zn+9	valid
1o9d	general	Protein-Ligand	2.3	Kd=2.5uM	Kd	5.6	2003	14-3-3-like protein c	5-mer	Q40409 P93343	C26H43N6O13P	678.626	678.263	89	89	348.4	-5.02	-2.19	8	12	23	OC[C@@H](C(=O)N[C@H](C(=O)N[C@@H]([C@H](OP(O)(O)O)C)C(=O)N[C@H](C(=O)O)C(C)C)Cc1ccc(cc1)O)NC(=O)[C@H](CCC(=O)N)[NH3+]	0	C245H81N69O67+8	train
1oai	general	Protein-Ligand	1	Kd=10uM	Kd	5	2003	nuclear rna export factor	9-mer	Q9UBU9	C41H60N10O15	932.973	932.424	126	127	423.37	-6.86	-4.7	13	15	39	[NH3+]CCCC[C@@H](C(=O)O)NC(=O)[C@@H](NC(=O)CNC(=O)[C@@H](NC(=O)[C@@H](NC(=O)[C@H](Cc1ccccc1)NC(=O)CNC(=O)[C@@H](NC(=O)[C@H](CC(=O)O)[NH3+])CO)CO)Cc1ccccc1)CO	0	C190H54N52O54S2+5	train
1oar	refined	Protein-Ligand	2.22	Kd=40nM	Kd	7.4	2004	immunoglobuling e	AZN	P01724	C14H10O7S	322.29	322.015	32	34	160.59	2.09	2.46	2	7	2	O=C1c2ccccc2C(=O)c2c1cc(c(c2O)O)S(O)(O)O	0	C267H68N60O61S+2	test
1oau	refined	Protein-Ligand	1.8	Kd=20nM	Kd	7.7	2004	immunoglobulin e	SER-DNF	P01724	C9H9N3O7	271.184	271.044	28	28	161.2	1.94	1.48	2	7	4	OC[C@@H](C(=O)O)Nc1ccc(cc1N(=O)=O)N(=O)=O	0	C246H62N58O59S2+2	train
1oay	general	Protein-Ligand	2.66	Kd=1.2uM	Kd	5.92	2004	immunoglobulin e	FUR	P01724	C8H5N3O5	223.142	223.023	21	22	106.46	1.1	1.35	0	3	2	O=N(=O)c1ccc(o1)/C=N\n1ccoc1=O	0	C218H62N52O50S+3	test
1oba	refined	Protein-Ligand	2.45	Kd=3.6mM	Kd	2.44	2003	lysozyme	CHT	P15057	C5H14NO	104.171	104.108	21	20	20.23	-0.4	-0.32	1	1	3	OCC[N+](C)(C)C	0	C166H43N36O45S3+4	test
1obx	general	Protein-Ligand	1.35	Kd=1.9uM	Kd	5.72	2003	syntenin 1	8-mer	O00560 Q01344	C21H31N4O8	467.493	467.214	64	64	209.77	-0.8	-1.33	5	8	15	OC[C@@H](C(=O)N[C@H](C(=O)N[C@H](C(=O)O)Cc1ccccc1)C(C)C)NC(=O)[C@H](CC(=O)O)[NH3+]	1	C234H93CoN57O67S+6	valid
1ocn	general	Protein-Ligand	1.31	Ki=412nM	Ki	6.39	2003	cellobiohydrolase ii	2-mer	Q9C1S9	C12H24NO8	310.321	310.15	45	46	156.45	-3.69	-3.71	7	6	10	OC[C@H]1O[C@@H](O[C@H]2[C@H](O)C[NH2+]C[C@@H]2CO)[C@@H]([C@H]([C@@H]1O)O)O	0	C326H118N95O107S4+5	train
1ocq	refined	Protein-Ligand	1.08	Ki=6.5uM	Ki	5.19	2003	endoglucanase 5a	IFM-BGC	O85465	C12H24NO8	310.321	310.15	45	46	156.45	-3.69	-3.71	7	6	10	OC[C@H]1O[C@@H](O[C@H]2[C@H](O)C[NH2+]C[C@@H]2CO)[C@@H]([C@H]([C@@H]1O)O)O	0	C235H93N65O82+4	train
1od8	refined	Protein-Ligand	1.05	Ki=8uM	Ki	5.1	2003	endo-1,4-beta-xylanase a	XDL-XYP	P26514	C10H17NO7	263.244	263.101	35	36	128.48	-3.09	-2.98	5	5	6	O[C@@H]1C(=O)NCC[C@H]1O[C@@H]1OC[C@H]([C@@H]([C@H]1O)O)O	0	C209H88N67O73+6	test
1odi	refined	Protein-Ligand	2.4	Kd=62uM	Kd	4.21	2003	purine nucleoside phosphorylase	ADN	Q5SID9	C10H13N5O4	267.241	267.097	32	34	139.54	-1.9	-1.4	4	6	5	OC[C@H]1O[C@H]([C@@H]([C@@H]1O)O)n1cnc2c1ncnc2N	0	C311H126N89O95S3+7	valid
1odj	refined	Protein-Ligand	2.4	Kd=80uM	Kd	4.1	2003	purine nucleoside phosphorylase	GMP	Q5SID9	C10H13N5O5	283.241	283.092	33	35	159.51	-2.73	-2.11	5	5	5	OC[C@H]1O[C@H]([C@@H]([C@@H]1O)O)n1cnc2c1nc(N)[nH]c2=O	0	C214H82N61O69S+5	test
1ody	general	Protein-Ligand	2	Ki=8nM	Ki	8.1	1999	HIV-1 protease	LP1	P04585	C45H58N6O7	794.978	794.437	116	119	208.82	5.68	6.23	7	7	26	CC[C@@H](C(=O)N[C@H](C(=O)N)Cc1cccc2c1cccc2)NC(=O)C[C@@H]([C@@H](NC(=O)[C@H](C(C)C)NC(=O)[C@H](Cc1cccc2c1cccc2)NC(=O)C)CC(C)C)O	0	C350H110N94O98S2+6	valid
1oe0	general	Protein-Ligand	2.4	IC50=6.9uM	IC50	5.16	2003	deoxyribonucleoside kinase	TTP	Q9XZT6	C10H20N2O14P3	485.192	485.013	49	50	294.39	-5.12	-2.48	2	10	8	O[C@H]1C[C@@H](O[C@@H]1COP(OP(OP(O)(O)O)(O)O)(O)O)n1cc(C)c(=O)[nH]c1=O	1	C389H141MgN100O112S4+8	train
1oe7	general	Protein-Ligand	1.8	Kd=3uM	Kd	5.52	2003	glutathione s-transferase	GSH	P30114	C10H18N3O6S	308.331	308.092	38	37	199.24	-2.73	-2.14	3	6	10	SC[C@@H](C(=O)NCC(=O)O)NC(=O)CC[C@@H](C(=O)O)[NH3+]	0	C324H117N84O85S2+9	train
1oe8	refined	Protein-Ligand	1.65	Kd=3uM	Kd	5.52	2003	glutathione s-transferase	GSH	P30114	C10H18N3O6S	308.331	308.092	38	37	199.24	-2.73	-2.14	3	6	10	SC[C@@H](C(=O)NCC(=O)O)NC(=O)CC[C@@H](C(=O)O)[NH3+]	0	C314H117N85O85S2+10	valid
1ofz	general	Protein-Ligand	1.5	Kd=24.1uM	Kd	4.62	2003	fucose-specific lectin	FUL	P18891	C6H12O5	164.156	164.068	23	23	90.15	-2.09	-2.19	4	4	4	O[C@@H]1[C@H](C)O[C@@H]([C@H]([C@@H]1O)O)O	0	C185H58N54O49+5	train
1ogd	refined	Protein-Ligand	1.95	Kd=0.93mM	Kd	3.03	2003	ribose transport protein rbsd	RIP	P36946	C5H10O5	150.13	150.053	20	20	90.15	-2.52	-2.58	4	4	4	O[C@@H]1CO[C@H]([C@@H]([C@@H]1O)O)O	0	C181H72N47O56S+5	valid
1ogg	refined	Protein-Ligand	1.97	Ki=6.4uM	Ki	5.19	2004	chitinase b	3-mer	P11797	C25H43N4O14	623.627	623.278	86	89	263.17	-6.52	-5.62	9	9	18	OC[C@H]1O[C@@H](O[C@@H]2[C@@H](CO)[C@H]3[C@@H]([C@H]2O)[NH+]=C(O3)N(C)C)[C@@H]([C@@H]([C@@H]1O[C@@H]1O[C@H](CO)[C@H]([C@H]([C@H]1NC(=O)C)O)O)O)NC(=O)C	0	C367H126N84O101S2+2	train
1ogu	general	Protein-Ligand	2.6	IC50=0.034uM	IC50	7.47	2003	cell division protein kinase 2	ST8	P20248 P24941	C18H22N6O3	370.406	370.175	49	51	145.58	3.2	4.61	3	4	6	O=Nc1c(OCC2CCCCC2)nc(nc1N)Nc1ccc(cc1)C(=O)N	0	C308H87N77O80+10	train
1ogx	refined	Protein-Ligand	2	Kd=0.81uM	Kd	6.09	2003	steroid delta-isomerase	EQU	P07445	C18H18O2	266.334	266.131	38	41	37.3	3.47	3.94	1	2	1	Oc1ccc2c(c1)ccc1c2CC[C@]2([C@H]1CCC2=O)C	0	C301H95N72O77S6+4	train
1ogz	refined	Protein-Ligand	2.3	Kd=1.4uM	Kd	5.85	2003	STEROID DELTA-ISOMERASE(P39A)	EQU	P00947	C18H18O2	266.334	266.131	38	41	37.3	3.47	3.94	1	2	1	Oc1ccc2c(c1)ccc1c2CC[C@]2([C@H]1CCC2=O)C	0	C284H89N62O67S+4	valid
1oh4	general	Protein-Ligand	1.35	Kd=0.18mM	Kd	3.74	2004	beta-mannosidase	7-mer	Q9RIK9	C42H72O36	1153	1152.38	150	156	585.28	-14.36	-16.28	23	23	42	OC[C@H]1O[C@@H](O[C@@H]2[C@@H](CO)O[C@H]([C@H]([C@H]2O)O)O)[C@H]([C@H]([C@@H]1O[C@@H]1O[C@H](CO[C@H]2O[C@H](CO)[C@@H]([C@@H]([C@H]2O)O)O)[C@H]([C@@H]([C@@H]1O)O)O[C@@H]1O[C@H](CO[C@H]2O[C@H](CO)[C@@H]([C@@H]([C@H]2O)O)O)[C@H]([C@@H]([C@@H]1O)O)O[C@@H]1O[C@H](CO)[C@H]([C@@H]([C@@H]1O)O)O)O)O	0	C204H65N59O56+7	test
1ohr	refined	Protein-Ligand	2.1	Ki=2nM	Ki	8.7	1998	HIV-1 protease	1UN	Q9Q288	C32H46N3O4S	568.79	568.321	86	89	128.4	5.67	5.68	5	4	14	O[C@@H]([C@@H](NC(=O)c1cccc(c1C)O)CSc1ccccc1)C[N@@H+]1C[C@H]2CCCC[C@H]2C[C@H]1C(=O)NC(C)(C)C	0	C351H110N93O99S2+6	valid
1oi9	general	Protein-Ligand	2.1	IC50=69nM	IC50	7.16	2004	cell division protein kinase 2	N20	P20248 P24941	C18H21N5O2	339.392	339.17	46	49	95.95	4.3	3.83	3	4	6	Oc1ccc(cc1)Nc1nc(OCC2CCCCC2)c2c(n1)[nH]cn2	0	C301H83N72O76+10	train
1oif	refined	Protein-Ligand	2.12	Kd=19nM	Kd	7.72	2003	beta-glucosidase a	IFM	Q08638	C6H14NO3	148.18	148.097	24	24	77.3	-1.54	-1.54	4	3	4	OC[C@H]1C[NH2+]C[C@H]([C@@H]1O)O	0	C261H93N70O74S+5	train
1oim	general	Protein-Ligand	2.15	Kd=4.8uM	Kd	5.32	2003	beta-glucosidase a	NOJ	Q08638	C6H14NO4	164.18	164.092	25	25	97.53	-2.35	-2.42	5	4	5	OC[C@H]1[NH2+]C[C@@H]([C@H]([C@@H]1O)O)O	0	C263H90N70O72S+5	train
1oiq	general	Protein-Ligand	2.31	IC50=2.9uM	IC50	5.54	2003	cell division protein kinase 2	HDU	P24941	C14H14N5O	268.294	268.12	34	36	74.77	1.83	1.55	2	3	3	CC(=O)Nc1nccc(n1)c1c(C)[nH]c2[n+]1cccc2	0	C286H76N68O66+10	train
1oir	general	Protein-Ligand	1.91	IC50=0.032uM	IC50	7.49	2003	cell division protein kinase 2	HDY	P24941	C23H28N6O2	420.507	420.227	59	62	91.6	3.59	1.22	4	3	9	C[NH+](C[C@@H](COc1ccc(cc1)Nc1nccc(n1)c1c(C)[nH]c2[n+]1cccc2)O)C	0	C307H94N71O80+8	train
1oiu	general	Protein-Ligand	2	IC50=0.21uM	IC50	6.68	2004	cell division protein kinase 2	N76	P20248 P24941	C18H22N6O3S	402.471	402.147	50	53	144.26	3.22	4.56	3	5	6	NS(=O)(=O)c1cccc(c1)Nc1nc(OCC2CCCCC2)c2c(n1)[nH]cn2	0	C309H85N76O78+9	valid
1oiy	general	Protein-Ligand	2.4	IC50=64nM	IC50	7.19	2004	cell division protein kinase 2	N41	P20248 P24941	C19H22N6O2	366.417	366.18	49	52	118.81	3.53	3.93	3	4	6	NC(=O)c1ccc(cc1)Nc1nc(OCC2CCCCC2)c2c(n1)[nH]cn2	0	C323H88N76O82+9	train
1ok7	general	Protein-Ligand	1.65	Kd=1.2uM	Kd	5.92	2004	DNA polymerase III	16-mer	Q47155 P0A988	C36H69N11O9	800.001	799.528	125	124	348.64	0.64	-0.14	8	9	32	CC(C[C@@H](C(=O)N[C@H](C(=O)N[C@H](C(=O)NCC(=O)N[C@H](C(=O)O)CC(C)C)CC(C)C)C(C)C)NC(=O)[C@@H](NC(=O)[C@H](CCC[NH+]=C(N)N)[NH3+])CCC(=O)N)C	0	C219H67N65O65S2+7	train
1okl	refined	Protein-Ligand	2.1	Kd=0.93uM	Kd	6.03	1997	carbonic anhydrase ii	MNS	P00918	C12H14N2O2S	250.317	250.078	31	32	71.78	1.86	3.33	1	2	2	CN(c1cccc2c1cccc2S(=O)(=O)N)C	1	C325H100N82O73SZn+7	valid
1oko	general	Protein-Ligand	1.6	Kd=29uM	Kd	4.54	2003	pa-i galactophilic lectin	GLB	Q05097	C6H12O6	180.156	180.063	24	24	110.38	-2.59	-3.22	5	5	6	OC[C@H]1O[C@@H](O)[C@@H]([C@H]([C@H]1O)O)O	1	C134H42CaN34O42S+	valid
1okv	general	Protein-Ligand	2.3	IC50=0.68uM	IC50	6.17	2003	cell division protein kinase 2	6-mer	P20248 P24941	C33H61N12O5	705.915	705.489	111	111	319.15	3.66	-1.31	6	5	27	CC[C@@H]([C@@H](C(=O)N[C@H](C(=O)N)Cc1ccccc1)NC(=O)[C@@H](NC(=O)[C@@H](NC(=O)[C@H](CCC[NH+]=C(N)N)[NH3+])CCC[NH+]=C(N)N)CC(C)C)C	0	C279H89N70O84S2+4	test
1okw	general	Protein-Ligand	2.5	IC50=5.6uM	IC50	5.25	2003	cell division protein kinase 2	7-mer	P20248 P24941	C33H56ClN13O7	782.334	781.411	110	110	363.7	1.71	-0.84	7	7	29	CC(C[C@@H](C(=O)N[C@H](C(=O)N[C@H](C(=O)N)Cc1cccc(c1)Cl)CC(=O)N)NC(=O)[C@@H](NC(=O)[C@@H](NC(=O)C)CCC[NH+]=C(N)N)CCC[NH+]=C(N)N)C	0	C263H83N64O79S+3	test
1okx	general	Protein-Ligand	2.8	IC50=0.16uM	IC50	6.8	2003	elastase 1	8-mer	P00772	C44H67ClN8O14	967.501	966.447	134	136	331.23	2.56	0.95	11	13	21	CCCC(=O)N[C@H](C(=O)N[C@H](C(=O)N[C@H]1[C@@H](C)OC(=O)[C@@H](NC(=O)[C@H](Cc2ccc(c(c2)Cl)O)NC(=O)[C@@H](N2C(=O)[C@@H](NC(=O)[C@@H](NC1=O)CC(C)C)CC[C@H]2O)[C@H](O)C)C(C)C)[C@H](O)C)C	0	C248H91N73O82S5+6	train
1ol1	general	Protein-Ligand	2.9	IC50=21uM	IC50	4.68	2003	cell division protein kinase 2	6-mer	P20248 P24941	C33H55FN9O8	724.844	724.416	106	106	291.58	-0.62	2.74	9	8	28	CC[C@@H]([C@@H](C(=O)N[C@H](C(=O)O)Cc1ccc(cc1)F)NC(=O)[C@@H](NC(=O)[C@@H](NC(=O)[C@H](CCCNC(=O)N)[NH3+])CCCNC(=O)N)CC(C)C)C	0	C274H85N66O84S2+4	train
1ol2	general	Protein-Ligand	2.6	IC50=0.53uM	IC50	6.28	2003	cell division protein kinase 2	6-mer	P20248 P24941	C31H55FN13O6	724.85	724.438	106	106	362.24	0.92	-2.64	7	6	27	CC(C[C@@H](C(=O)N[C@H](C(=O)N[C@H](C(=O)N)Cc1ccc(cc1)F)CC(=O)N)NC(=O)[C@@H](NC(=O)[C@H](CCC[NH+]=C(N)N)[NH3+])CCC[NH+]=C(N)N)C	0	C260H75N66O76S2+5	train
1ols	refined	Protein-Ligand	1.85	Kd=1.52uM	Kd	5.82	2003	2-oxoisovalerate dehydrogenase	TDP	P12694 P21953	C12H21N4O7P2S	427.33	427.061	47	48	231.76	-1.41	1.34	1	7	7	Cc1ncc(c(n1)N)Cn1csc(c1C)CCOP(OP(O)(O)O)(O)O	1	C439H158MnN117O140S4+8	test
1olu	refined	Protein-Ligand	1.9	Kd=39.3uM	Kd	4.41	2003	2-oxoisovalerate dehydrogenase	TDP	P12694 P21953	C12H21N4O7P2S	427.33	427.061	47	48	231.76	-1.41	1.34	1	7	7	Cc1ncc(c(n1)N)Cn1csc(c1C)CCOP(OP(O)(O)O)(O)O	1	C385H143MgN99O126S3+6	train
1olx	refined	Protein-Ligand	2.25	Kd=47.1uM	Kd	4.33	2003	2-oxoisovalerate dehydrogenase	TDP	P12694 P21953	C12H21N4O7P2S	427.33	427.061	47	48	231.76	-1.41	1.34	1	7	7	Cc1ncc(c(n1)N)Cn1csc(c1C)CCOP(OP(O)(O)O)(O)O	1	C420H156MnN109O138S3+4	train
1om1	refined	Protein-Ligand	1.68	Ki=0.17uM	Ki	6.77	2004	casein kinase ii	IQA	P28523	C17H12N2O3	292.289	292.085	34	37	74.57	3.81	2.56	1	3	1	OC(=O)Cc1c2ccccc2n2c1[nH]c(=O)c1c2cccc1	0	C286H85N74O73S2+8	valid
1om2	general	Protein-Ligand	NMR	Kd=20uM	Kd	4.7	2000	rat Tom20(translocases of outer mitochondrial membranes)	11-mer	P11884 Q62760	C55H96N17O15	1235.46	1234.73	183	184	539.86	0.17	-3.72	13	15	50	[NH3+]CC(=O)N1CCC[C@H]1C(=O)N[C@H](C(=O)N[C@H](C(=O)N[C@H](C(=O)N[C@H](C(=O)N[C@H](C(=O)N[C@H](C(=O)N[C@H](C(=O)N[C@H](C(=O)N[C@H](C(=O)O)C)Cc1ccc(cc1)O)CO)CC(C)C)CC(C)C)CCC[NH+]=C(N)N)CO)CC(C)C)CCC[NH+]=C(N)N	0	C206H62N49O55+3	train
1om9	general	Protein-Ligand	2.5	Kd=70uM	Kd	4.15	2003	ADP-ribosylation factor binding protein GGA1	15-mer	Q7Z6B0 Q9UJY5	C50H68N11O21	1159.14	1158.46	150	151	525.37	-0.76	-2.71	13	21	44	O=C(N[C@H](C(=O)N[C@H](C(=O)N[C@H](C(=O)N[C@H](C(=O)N[C@H](C(=O)N[C@H](C(=O)O)[C@H](O)C)CCC(=O)O)C)C)CCC(=O)O)Cc1ccccc1)CNC(=O)CNC(=O)[C@@H](NC(=O)[C@@H](NC(=O)[C@H](CC(=O)O)[NH3+])CC(=O)O)Cc1ccccc1	0	C185H50N50O44S2+6	train
1ong	general	Protein-Ligand	1.1	IC50=9nM	IC50	8.05	2003	beta-lactamase shv-1	WY4	P0AD64	C13H13N3O4S	307.325	307.063	34	36	119.08	-0.44	0.45	0	4	2	O=C[C@H]1C=NC(=CS[C@H]1c1cn2c(n1)COCC2)C(=O)O	0	C206H78N59O72S4+5	test
1onh	general	Protein-Ligand	1.38	IC50=6.2nM	IC50	8.21	2003	metallo-beta-lactamase class c	WY4	Q59401	C13H13N3O4S	307.325	307.063	34	36	119.08	-0.2	0.25	0	4	2	O=CC1=CN=C(CS[C@H]1c1cn2c(n1)COCC2)C(=O)O	0	C258H84N67O74+6	train
1onp	general	Protein-Ligand	2.5	IC50=0.030uM	IC50	7.52	2003	E. coli 1-deoxy-D-xylulose 5-phosphate reductoisomerase (DXR)	FOM	P45568	C4H10NO5P	183.1	183.03	21	20	120.78	-2.25	0.21	0	5	4	O=C[N](=O)CCCP(O)(O)O	1	C207H81MnN66O65S3+7	valid
1ony	refined	Protein-Ligand	2.15	Ki=0.17uM	Ki	6.77	2003	tyrosine phosphatase 1b	588	P18031	C27H34N4O9S	590.645	590.205	75	76	221.65	3.7	3.88	3	9	16	CCCCCNC(=O)[C@@H](NS(=O)(=O)C)Cc1ccc(c(c1)CCC(=O)N)N(c1ccccc1C(=O)O)C(=O)C(=O)O	0	C251H85N82O74S4+10	train
1onz	refined	Protein-Ligand	2.4	Kd=8uM	Kd	5.1	2003	tyrosine phosphatase 1b	968	P18031	C19H13NO6	351.31	351.074	39	41	115.14	4.95	2.99	1	6	4	Oc1ccc2c(c1)c(ccc2)N(c1ccccc1C(=O)O)C(=O)C(=O)O	0	C220H69N69O65S+8	train
1oq5	general	Protein-Ligand	1.5	IC50=21nM	IC50	7.68	2004	carbonic anhydrase ii	CEL	P00918	C17H14F3N3O2S	381.372	381.076	40	42	86.36	3.4	5.3	1	3	3	Cc1ccc(cc1)c1cc(nn1c1ccc(cc1)S(=O)(=O)N)C(F)(F)F	1	C337H101N86O73SZn+6	train
1ork	refined	Protein-Ligand	2.4	Kd=1.56nM	Kd	8.81	1999	tetracycline repressor	ATC	P0ACT4	C25H32N4O8	516.544	516.222	69	72	196.13	0.23	-2.44	8	8	10	C[NH+](CC(=O)Nc1ccc2c(c1O)C(=O)C1=C(O)[C@]3([C@@H](C[C@@H]1C2)[C@H]([NH+](C)C)C(=C(C3=O)C(=O)N)O)O)C	1	C401H134MgN109O121S3+7	train
1orw	general	Protein-Ligand	2.84	Ki=25.1nM	Ki	7.6	2003	dipeptidyl peptidase iv	2-mer	P22411	C14H22IN3O	375.248	375.081	41	42	75.59	1.07	-0.39	2	1	5	[NH3+]C[C@@H]1CCCN1C(=O)[C@H](Cc1ccc(cc1)I)[NH3+]	0	C283H83N70O72S+5	train
1os0	refined	Protein-Ligand	2.1	Ki=0.93uM	Ki	6.03	2003	thermolysin	0PQ	P00800	C27H33N2O5P	496.535	496.213	68	70	148.09	1.42	2.69	2	5	12	O=C([C@@H](CP([C@H](Cc1ccccc1)[NH3+])(O)O)Cc1ccccc1)N[C@H](C(=O)O)Cc1ccccc1	1	C300H117CaN78O105SZn+3	train
1os5	refined	Protein-Ligand	2.2	Kd=0.14uM	Kd	6.85	2004	hepatitis c virus ns5b rna polymerase	NH1	P26663	C29H37NO4S	495.673	495.244	72	75	118.08	7.35	7.53	3	3	9	Oc1ccc(cc1)CC[C@]1(CC(=C(C(=O)O1)Sc1cc(C)c(cc1C(C)(C)C)N)O)C1CCCC1	0	C300H87N80O72S+10	test
1oss	refined	Protein-Ligand	1.93	Ki=16.4uM	Ki	4.79	2003	trypsin	BEN	P00775	C7H9N2	121.16	121.077	18	18	51.61	2.71	-0.15	0	0	1	NC(=[NH2+])c1ccccc1	0	C192H69N53O61S5+2	test
1oth	general	Protein-Ligand	1.85	Ki=0.1uM	Ki	7	1999	human ornithine transcarbamylase	PAO	P00480	C7H17N2O6P	256.193	256.082	33	32	168.32	-4.41	-2.29	2	6	6	O=C(CP(O)(O)O)NCCC[C@@H](C(=O)O)[NH3+]	0	C307H123N95O94S3+10	train
1ouk	general	Protein-Ligand	2.5	IC50=0.13nM	IC50	9.89	2003	mitogen-activated protein kinase 14	084	Q16539	C28H30F3N6	507.573	507.248	67	71	72.24	4.9	6.82	2	3	6	Cn1c(nc(c1c1ccnc(n1)N[C@H](c1ccccc1)C)c1cccc(c1)C(F)(F)F)C1CC[NH2+]CC1	0	C340H102N88O92S3+5	train
1ouy	general	Protein-Ligand	2.5	IC50=4.3nM	IC50	8.37	2003	mitogen-activated protein kinase 14	094	Q16539	C24H14Cl2F2N4OS	515.362	514.023	48	52	85.11	6.31	6.56	1	2	4	Fc1ccc(c(c1)F)Sc1nc2cnc(=O)n(c2cc1[C@@H]1C=CNC=C1)c1c(Cl)cccc1Cl	0	C298H87N77O77S2+7	train
1ov3	general	Protein-Ligand	1.8	Kd=0.19uM	Kd	6.72	2003	tandem SH3domains of p47phox	18-mer	P14598	C51H83N15O12	1098.3	1097.63	161	167	386.44	-1.98	-4.13	6	12	31	OC[C@@H](C(=O)N[C@H](C(=O)N1CCC[C@H]1C(=O)N1CCC[C@H]1C(=O)N1CCC[C@H]1C(=O)N[C@H](C(=O)N1CCC[C@H]1C(=O)N1CCC[C@H]1C)CCC[NH+]=C(N)N)CC(=O)N)NC(=O)[C@@H]1CCCN1C(=O)[C@@H]1CCCN1C(=O)[C@@H]([NH3+])C	0	C272H74N57O77S+2	train
1ove	general	Protein-Ligand	2.1	IC50=0.74nM	IC50	9.13	2003	mitogen-activated protein kinase 14	358	Q16539	C26H18Cl2F2N2O	483.337	482.076	51	55	32.34	6.63	7.66	1	1	3	Fc1ccc(c(c1)F)c1cc(cc2c1CCC(=O)N2c1c(Cl)cccc1Cl)[C@@H]1C=CNC=C1	0	C315H94N82O85S2+5	train
1owd	general	Protein-Ligand	2.32	Ki=6.3nM	Ki	8.2	2003	urokinase-type plasminogen activator	497	P00749	C23H26N4O	374.479	374.211	54	57	97.32	4.88	3.47	2	1	5	CC[C@H]1C[NH2+]Cc2c1cc(cc2)NC(=O)c1ccc2c(c1)ccc(c2)C(=[NH2+])N	0	C321H120N80O94S5+5	valid
1owe	refined	Protein-Ligand	1.6	Ki=631nM	Ki	6.2	2003	urokinase-type plasminogen activator	675	P00749	C18H16N3O	290.339	290.129	38	40	80.71	4.8	2.33	1	1	4	O=C(c1ccc2c(c1)ccc(c2)C(=[NH2+])N)Nc1ccccc1	0	C294H107N74O84S5+6	test
1owh	refined	Protein-Ligand	1.61	Ki=40nM	Ki	7.4	2003	urokinase-type plasminogen activator	239	P00749	C19H20N4O	320.388	320.164	44	46	108.35	3.65	1.07	2	1	5	[NH3+]Cc1ccc(cc1)NC(=O)c1ccc2c(c1)ccc(c2)C(=[NH2+])N	0	C276H100N68O80S5+5	train
1owi	general	Protein-Ligand	2.93	Ki=28.0nM	Ki	7.55	2003	urokinase-type plasminogen activator	426	P00749	C23H24N3O2	374.456	374.187	52	55	89.94	6.03	3.65	1	1	6	O=C(c1ccc2c(c1)ccc(c2)C(=[NH2+])N)Nc1cccc(c1)OC1CCCC1	0	C312H114N82O87S5+7	train
1owk	general	Protein-Ligand	2.8	Ki=23.5nM	Ki	7.63	2003	urokinase-type plasminogen activator	303	P00749	C24H28N4O	388.505	388.226	57	60	97.32	5.56	3.72	2	1	5	O=C(c1ccc2c(c1)ccc(c2)C(=[NH2+])N)Nc1ccc2c(c1)[C@@H]([NH2+]CC2)C(C)C	0	C313H117N79O94S5+6	test
1ox9	general	Protein-Ligand	2.9	Kd=6.16uM	Kd	5.21	2003	stringent starvation protein b	11-mer	P0AFZ3	C35H51N10O16	867.837	867.348	112	112	449.65	-4.19	-2.69	11	16	31	OC(=O)CC[C@@H](C(=O)N[C@H](C(=O)N[C@H](C(=O)N[C@H](C(=O)O)C)Cc1ccc(cc1)O)CC(=O)N)NC(=O)[C@@H](NC(=O)[C@@H](NC(=O)[C@@H](NC(=O)[C@@H]([NH3+])C)C)CC(=O)N)CC(=O)O	0	C225H62N66O56+6	valid
1oxg	general	Protein-Ligand	2.2	Ki=0.027nM	Ki	10.57	2004	Chymotrypsinogen A	14-mer	P00766	C57H77N16O16	1242.32	1241.57	166	171	477.47	-5.15	-2.29	16	16	46	[NH3+]CC(=O)NCC(=O)NCC(=O)NCC(=O)NCC(=O)NCC(=O)N[C@H](C(=O)N[C@H](C(=O)N1CCC[C@H]1C(=O)NCC(=O)N[C@H](C(=O)N[C@H](C(=O)N1CCC[C@H]1C(=O)N[C@H](C(=O)O)Cc1c[nH]c2c1cccc2)Cc1c[nH]c2c1cccc2)CO)C(C)C)C	0	C179H62N46O53S4+4	train
1oxn	general	Protein-Ligand	2.2	Ki=2.1uM	Ki	5.68	2003	baculoviral iap repeat-containing protein 7	9-mer	Q96CA5	C16H29N4O7	389.424	389.204	56	55	189.54	-0.98	-1.13	4	7	12	OC(=O)CC[C@@H](C(=O)N[C@H](C(=O)N[C@H](C(=O)O)C(C)C)C)NC(=O)[C@@H]([NH3+])C	0	C187H61N52O49S+7	train
1oxq	general	Protein-Ligand	2.3	Ki=0.5uM	Ki	6.3	2003	baculoviral iap repeat-containing protein 7	9-mer	Q9NR28 Q96CA5	C19H35N4O5	399.505	399.261	63	63	143.45	-0.29	0.08	3	5	11	CC[C@@H]([C@@H](C(=O)O)NC(=O)[C@@H]1CCCN1C(=O)[C@H](C(C)C)NC(=O)[C@@H]([NH3+])C)C	0	C188H61N54O49S+7	test
1oxr	refined	Protein-Ligand	1.93	Kd=6.4uM	Kd	5.19	2004	phospholipase a2 isoform 3	AIN	P60045	C9H8O4	180.157	180.042	21	21	63.6	2.28	1.31	0	3	2	CC(=O)Oc1ccccc1C(=O)O	1	C228H79CaN55O65S7+4	valid
1oy7	general	Protein-Ligand	2.7	Ki=4.4uM	Ki	5.36	2003	baculoviral iap repeat-containing protein 7	9-mer	Q96CA5	C18H33N4O7	417.477	417.235	62	61	189.54	-0.02	-0.49	4	7	13	OC(=O)CC[C@@H](C(=O)N[C@H](C(=O)N[C@H](C(=O)O)C(C)C)C(C)C)NC(=O)[C@@H]([NH3+])C	0	C184H58N51O48S+7	valid
1oyn	general	Protein-Ligand	2	IC50=0.55uM	IC50	6.26	2003	camp-specific phosphodiesterase pde4d2	ROL	Q08499	C16H21NO3	275.343	275.152	41	43	47.56	2.21	2.95	1	1	4	COc1ccc(cc1OC1CCCC1)[C@H]1CNC(=O)C1	1	C326H114N83O93S6Zn2+5	train
1oyq	refined	Protein-Ligand	1.9	Ki=110nM	Ki	6.96	2003	trypsin beta	T87	P00760	C29H32N7O3	526.609	526.257	71	75	142.24	5.5	2.83	1	3	12	CCOC(=O)CO/N=C(\C1(CC1)c1ccc2c(c1)nc(n2C)CNc1ccc(cc1)C(=[NH2+])N)/c1ccccn1	0	C272H95N73O87S6+3	valid
1oyt	refined	Protein-Ligand	1.67	Ki=0.057uM	Ki	7.24	2003	thrombin alpha	FSN	P28506 P00734	C23H25FN4O2	408.469	408.196	55	59	93.43	3.49	1.4	1	2	4	Fc1ccc(cc1)CN1C(=O)[C@H]2[C@@H](C1=O)[C@H]1[N@@H+]([C@H]2c2ccc(cc2)C(=[NH2+])N)CCC1	0	C330H109N83O90S5+6	test
1oz0	refined	Protein-Ligand	2.5	Kd=20nM	Kd	7.7	2003	aicar transformylase-imp cyclohydrolase	MS1	P31335	C32H35N9O15P	816.645	816.199	92	96	402.78	-2.64	-0.55	6	15	17	OC(=O)CC[C@@H](C(=O)O)NC(=O)c1ccc(cc1)N(C(=O)/C=C/c1n(cnc1C(=O)N)[C@@H]1O[C@@H]([C@H]([C@H]1O)O)COP(O)(O)O)Cc1ccc2c(n1)c(=O)[nH]c(n2)N	0	C413H131N127O128S5+12	valid
1ozv	general	Protein-Ligand	2.65	Ki=36.6mM	Ki	1.44	2003	ribulose-1,5 bisphosphate carboxylase/oxygenase	LYS	Q43088	C6H16N2O2	148.203	148.121	26	25	92.58	-2.35	-1.91	2	2	4	[NH3+]CCCC[C@@H](C(=O)O)[NH3+]	0	C264H79N64O69S+4	train
1p01	general	Protein-Ligand	2	Ki=0.35nM	Ki	9.46	1990	alpha-lytic protease	0EG	P00778	C17H32BN3O6	385.263	385.238	59	59	128.2	1.06	1.18	4	5	13	O=C(OC(C)(C)C)N[C@H](C(=O)N1CCC[C@H]1C(=O)N[C@@H](C(C)C)B(O)O)C	0	C189H68N61O69S4+2	train
1p02	general	Protein-Ligand	2	Ki=67nM	Ki	7.17	1990	alpha-lytic protease	5-mer	P00778	C13H26BN4O5	329.18	329.2	49	49	146.61	-1.8	-2.23	5	5	11	C[C@@H](B(O)O)NC(=O)[C@@H]1CCCN1C(=O)[C@@H](NC(=O)[C@@H]([NH3+])C)C	0	C203H68N63O71S4+2	train
1p03	general	Protein-Ligand	2.15	Ki=6.4nM	Ki	8.19	1990	alpha-lytic protease	5-mer	P00778	C15H30BN4O5	357.234	357.231	55	55	146.61	-0.83	-1.6	5	5	12	C[C@@H](C(=O)N[C@H](C(=O)N1CCC[C@H]1C(=O)N[C@H](B(O)O)C(C)C)C)[NH3+]	0	C223H81N70O79S4+3	valid
1p04	general	Protein-Ligand	2.55	Ki=40nM	Ki	7.4	1990	alpha-lytic protease	5-mer	P00778	C16H32BN4O5	371.26	371.247	58	58	146.61	-0.48	-1.21	5	5	13	CC[C@H]([C@@H](B(O)O)NC(=O)[C@@H]1CCCN1C(=O)[C@@H](NC(=O)[C@@H]([NH3+])C)C)C	0	C215H79N71O75S5+3	train
1p05	general	Protein-Ligand	2.1	Ki=1100nM	Ki	5.96	1990	alpha-lytic protease	5-mer	P00778	C16H32BN4O5	371.26	371.247	58	58	146.61	-0.37	-1.06	5	5	14	CCCC[C@@H](B(O)O)NC(=O)[C@@H]1CCCN1C(=O)[C@@H](NC(=O)[C@@H]([NH3+])C)C	0	C229H78N75O75S5+4	train
1p06	general	Protein-Ligand	2.34	Ki=540nM	Ki	6.27	1990	alpha-lytic protease	5-mer	P00778	C19H30BN4O4	389.277	389.236	58	59	126.38	0.27	-0.72	4	4	12	OB[C@H](Cc1ccccc1)NC(=O)[C@@H]1CCCN1C(=O)[C@@H](NC(=O)[C@@H]([NH3+])C)C	0	C254H89N80O84S4+4	valid
1p0y	general	Protein-Ligand	2.55	Ki=100.8mM	Ki	1	2003	ribulose-1,5 bisphosphate carboxylase/oxygenase	MLZ	Q43088	C7H18N2O2	162.23	162.137	29	28	81.55	-1.84	-1.96	2	2	5	C[NH2+]CCCC[C@@H](C(=O)O)[NH3+]	0	C290H94N70O74S+5	train
1p10	general	Protein-Ligand	2.25	Ki=200nM	Ki	6.7	1990	alpha-lytic protease	5-mer	P00778	C15H30BN4O5	357.234	357.231	55	55	146.61	-0.83	-1.6	5	5	12	C[C@@H](C(=O)N[C@H](C(=O)N1CCC[C@H]1C(=O)N[C@H](B(O)O)C(C)C)C)[NH3+]	0	C195H65N63O66S3+3	train
1p17	general	Protein-Ligand	2.7	Kd=1.5mM	Kd	2.82	2004	hypoxanthine phosphoribosyltransferase	IMP	Q4DRC4	C10H14N4O8P	349.214	349.055	37	39	196.77	-3.96	-2.59	3	7	5	O[C@@H]1[C@H](O)[C@H](O[C@H]1n1cnc2c1nc[nH]c2=O)COP(O)(O)O	0	C304H97N76O84S+6	test
1p19	refined	Protein-Ligand	2.3	Kd=76.8uM	Kd	4.11	2004	hypoxanthine phosphoribosyltransferase	IMP	Q4DRC4	C10H14N4O8P	349.214	349.055	37	39	196.77	-3.96	-2.59	3	7	5	O[C@@H]1[C@H](O)[C@H](O[C@H]1n1cnc2c1nc[nH]c2=O)COP(O)(O)O	0	C285H92N69O79+5	train
1p1n	refined	Protein-Ligand	1.6	Kd=0.16uM	Kd	6.8	2003	glutamate receptor 2	KAI	P19491	C10H16NO4	214.238	214.108	31	31	91.21	0.52	0.87	1	4	2	OC(=O)C[C@H]1[C@H](C[NH2+][C@@H]1C(=O)O)C(=C)C	0	C283H91N65O83S2+5	valid
1p1o	refined	Protein-Ligand	1.6	Kd=1.74uM	Kd	5.76	2003	glutamate receptor 2	QUS	P19491	C5H8N3O5	190.134	190.046	21	21	132.94	-3	-3.18	2	4	2	OC(=O)[C@H](Cn1oc(=O)[nH]c1=O)[NH3+]	0	C272H95N64O78S3+5	valid
1p1q	refined	Protein-Ligand	2	Kd=12.8uM	Kd	4.89	2003	glutamate receptor 2	AMQ	P19491	C7H11N2O4	187.173	187.072	24	24	110.94	-2.34	-1.49	2	3	2	OC(=O)[C@H](Cc1c(C)o[nH]c1=O)[NH3+]	0	C289H100N68O84S3+5	test
1p28	general	Protein-Ligand	1.7	Kd=3.8uM	Kd	5.42	2003	pheromone binding protein	HBS/HBR	Q8MTC1	C4H8O2	88.105	88.052	14	13	37.3	-0.3	-0.04	1	2	2	CC(=O)[C@@H](O)C	0	C162H56N44O45S2+4	train
1p2a	general	Protein-Ligand	2.5	IC50=12nM	IC50	7.92	2003	cell division protein kinase 2	5BN	P24941	C17H16FN4O	311.334	311.131	39	42	88.32	1.68	1.98	4	1	4	[NH3+]CCNc1cc(c2ccc[nH]2)c2c3c1c(F)ccc3[nH]c2=O	0	C300H80N71O72+10	valid
1p4r	general	Protein-Ligand	2.55	Ki=8nM	Ki	8.1	2004	bifunctional purine biosynthesis protein purh	354	P31939	C20H19N5O8S	489.459	489.095	53	55	230.02	1.73	2.48	4	8	8	OC(=O)CC[C@@H](C(=O)O)NC(=O)c1ccc(cc1)NS(=O)(=O)c1ccc2c(c1)c(=O)[nH]c(n2)N	0	C329H118N109O105S2+13	train
1p4u	general	Protein-Ligand	2.2	Kd=5uM	Kd	5.3	2003	γ-adaptin ear domain of GGA3	13-mer	Q15276 Q9NZ52	C36H55N8O11	775.869	775.399	110	111	297.15	-0.82	-0.43	8	11	28	CC(C[C@@H](C(=O)N[C@H](C(=O)NCC(=O)N[C@H](C(=O)O)C)C(C)C)NC(=O)[C@@H]1CCCN1C(=O)CNC(=O)[C@@H](NC(=O)[C@H](CC(=O)O)[NH3+])Cc1ccccc1)C	0	C222H69N59O56S3+8	train
1p57	refined	Protein-Ligand	1.75	Ki=40uM	Ki	4.4	2004	serine protease hepsin	CR4	P05981	C14H13N4O	253.279	253.109	32	34	100.52	3.58	1.1	2	2	3	Oc1ccccc1c1nc2c([nH]1)ccc(c2)C(=[NH2+])N	0	C193H74N51O59S5+3	train
1p5e	general	Protein-Ligand	2.22	IC50=15.6uM	IC50	4.81	2003	cell division protein kinase 2	TBS	P20248 P24941	C6HBr4N3	434.708	430.69	14	15	41.57	3.86	4.01	1	2	0	Brc1c(Br)c(Br)c2c(c1Br)[nH]nn2	0	C228H70N55O57+7	train
1p6d	general	Protein-Ligand	2	Ki=1.15mM	Ki	2.94	2003	phospholipase c	3PC	P09598	C21H44NO7P	453.55	453.286	74	73	115.88	2.93	3.46	0	4	20	CCCCCC(=O)O[C@@H](CCP(OCC[N+](C)(C)C)(O)O)COC(=O)CCCCC	1	C321H95N81O94SZn3+6	test
1p6e	general	Protein-Ligand	2.3	Ki=1.21mM	Ki	2.92	2003	phospholipase c	PC5	P09598	C18H37NO6PS2	458.593	458.18	65	64	151.76	4.32	4.37	0	2	19	CCCCC(=O)O[C@@H](CO[P@@](=S)(OCC[N+](C)(C)C)S)COC(=O)CCCC	1	C273H86N71O87SZn3+5	valid
1p7m	general	Protein-Ligand	NMR	Kd=42uM	Kd	4.38	2003	dna-3-methyladenine glycosylase i	ADK	P05100	C6H8N5	150.161	150.078	19	20	71.47	-0.12	-0.05	2	2	0	C[n+]1cnc(c2c1nc[nH]2)N	0	C199H72N47O49S4+2	valid
1p93	general	Protein-Ligand	2.7	Kd=19nM	Kd	7.72	2003	human glucocorticoid receptor ligand-binding domain and a TIF2 coactivator motif	DEX	Q15596 P04150	C22H29FO5	392.461	392.2	57	60	94.83	2.04	1.9	3	5	5	OCC(=O)[C@@]1(O)[C@H](C)C[C@@H]2[C@]1(C)C[C@H](O)[C@]1([C@H]2CCC2=CC(=O)C=C[C@]12C)F	0	C365H119N86O92S12+3	test
1pa9	refined	Protein-Ligand	2	Ki=25uM	Ki	4.6	2003	tyrosine phosphatase yoph	CSN	P15273	C6H7NO7S	237.187	236.994	22	22	161.27	0.53	2.34	1	6	2	Oc1ccc(cc1OS(O)(O)O)N(=O)=O	0	C192H69N62O53S3+7	train
1pau	general	Protein-Ligand	2.5	Ki=0.35nM	Ki	9.46	1997	caspase-3 (apopain)	5-mer	P42574	C20H32N4O11	504.488	504.207	67	66	248.53	1.57	-1.03	5	11	18	OC[C@@H](NC(=O)[C@H](C(C)C)NC(=O)[C@@H](NC(=O)[C@@H](NC(=O)C)CC(=O)O)CCC(=O)O)CC(=O)O	0	C308H98N82O93S2+6	valid
1pb8	refined	Protein-Ligand	1.45	Ki=7.02uM	Ki	5.15	2003	glutamate [nmda] receptor	DSN	P35439	C3H8NO3	106.101	106.05	15	14	85.17	-3.17	-2.33	2	3	2	OC[C@H](C(=O)O)[NH3+]	0	C271H92N63O67S3+4	train
1pb9	refined	Protein-Ligand	1.6	Ki=241uM	Ki	3.62	2003	glutamate [nmda] receptor	4AX	P35439	C3H7N2O2	103.1	103.051	14	14	65.97	-1.51	-2.01	2	1	0	C1ONC(=O)[C@@H]1[NH3+]	0	C266H92N60O67S3+3	valid
1pbk	general	Protein-Ligand	2.5	Ki=0.9nM	Ki	9.05	1996	FK506 binding protein	RAP	Q00688	C51H79NO13	914.172	913.555	144	147	195.43	6.02	6.12	3	8	9	CO[C@@H]1C[C@@H](CC[C@H]1O)C[C@H]([C@H]1OC(=O)[C@@H]2CCCCN2C(=O)C(=O)[C@]2(O)O[C@@H](CC[C@H]2C)C[C@H](OC)/C(=C/C=C/C=C/[C@H](C[C@H](C(=O)[C@@H]([C@@H](/C(=C/[C@H](C(=O)C1)C)/C)O)OC)C)C)/C)C	0	C251H73N59O64S+5	train
1pbq	refined	Protein-Ligand	1.9	Ki=0.54uM	Ki	6.27	2003	glutamate [nmda] receptor	DK1	P35439	C10H5Cl2NO3	258.058	256.965	21	22	70.42	3.74	2.95	1	4	1	Clc1cc(Cl)c2c(c1)nc(cc2O)C(=O)O	0	C284H92N65O69S3+4	train
1pcg	general	Protein-Ligand	2.7	Ki=25nM	Ki	7.6	2003	estrogen receptor	9-mer	P03372	C47H91N14O11S2	1092.44	1091.64	165	164	512.08	0.5	-0.36	11	11	47	[NH3+]CCCC[C@@H](C(=O)N[C@@H](C(=O)N[C@H](C(=O)N[C@H](C(=O)N[C@H](C(=O)N[C@H](C(=O)N[C@H](C(=O)N[C@H](C(=O)N[C@H](C(=O)O)CCC(=O)N)CC(C)C)CC(C)C)CCC[NH+]=C(N)N)CS)CC(C)C)[C@H](CC)C)CS)[NH3+]	0	C187H60N49O52S+4	valid
1pdz	refined	Protein-Ligand	2.2	Ki=0.2mM	Ki	3.7	1995	enolase	PGA	P56252	C2H6O6P	157.039	156.99	15	14	120.81	-1.24	-1.26	0	5	1	OC(=O)COP(O)(O)O	1	C206H90MnN62O76S2+5	valid
1pf7	general	Protein-Ligand	2.6	Ki=72pM	Ki	10.14	2004	purine nucleoside phosphorylase	IMH	P00491	C11H15N4O4	267.261	267.109	34	36	138.84	-2.3	-1.48	6	4	5	OC[C@H]1[NH2+][C@H]([C@@H]([C@@H]1O)O)c1c[nH]c2c1nc[nH]c2=O	0	C289H91N76O84S5+4	valid
1pf8	general	Protein-Ligand	2.51	Ki=0.031uM	Ki	7.51	2003	cell division protein kinase 2	SU9	P24941	C13H11N3O2	241.245	241.085	29	31	67.01	1.04	2.05	2	2	2	COc1ccc2c(c1)/C(=C/c1cnc[nH]1)/C(=O)N2	0	C297H83N70O73+9	train
1pfu	refined	Protein-Ligand	1.91	Kd=1900uM	Kd	2.72	2004	methionyl-trna synthetase	MPJ	P00959	C4H14NO3PS	187.198	187.043	24	23	127.22	-3.81	-0.95	1	3	3	CSCC[C@@H](P(O)(O)O)[NH3+]	0	C248H87N62O62S3+4	train
1pfy	general	Protein-Ligand	1.93	IC50=7nM	IC50	8.15	2004	methionyl-trna synthetase	MSP	P00959	C15H24N7O7S2	478.524	478.118	55	57	253.1	-2.71	-1.18	5	8	12	CSCC[C@@H](C(=O)NS(=O)(=O)OC[C@H]1O[C@H]([C@@H]([C@@H]1O)O)n1cnc2c1ncnc2N)[NH3+]	0	C393H128N96O100S6+7	train
1pg2	general	Protein-Ligand	1.75	Kd=11uM	Kd	4.96	2004	methionyl-trna synthetase	MET	P00959	C5H12NO2S	150.219	150.059	21	20	90.24	-1.47	-0.57	1	2	3	CSCC[C@H]([NH3+])C(=O)O	0	C247H90N62O61S4+4	train
1pgp	refined	Protein-Ligand	2.5	Kd=2uM	Kd	5.7	1995	6-phosphogluconate dehydrogenase	6PG	P00349	C6H14O10P	277.143	277.032	31	30	201.73	-3.74	-3.81	4	9	9	O[C@@H]([C@H]([C@@H]([C@H](C(=O)O)O)O)O)COP(O)(O)O	0	C253H85N77O72S5+8	train
1ph0	general	Protein-Ligand	2.2	Ki=120nM	Ki	6.92	2003	protein-tyrosine phosphatase, non-receptor type	418	P18031	C31H31N3O12	637.591	637.191	77	79	229.1	6.76	3.56	3	10	17	COC(=O)c1c(OCCCCNC(=O)[C@H](Cc2ccc(cc2)N(c2ccccc2C(=O)O)C(=O)C(=O)O)NC(=O)O)cccc1O	0	C310H97N98O86S6+12	test
1phw	refined	Protein-Ligand	2.36	Ki=0.5mM	Ki	3.3	2004	2-dehydro-3-deoxyphosphooctonate aldolase	__N	P0A715	C5H12O7P	215.118	215.032	25	25	133.2	-3.26	-2.22	2	5	4	O[C@@H]1CO[C@@H]([C@H]1O)COP(O)(O)O	0	C257H86N74O71S2+8	train
1pi4	general	Protein-Ligand	1.39	Ki=37nM	Ki	7.43	2004	beta-lactamase	SM3	P00811	C13H14BNO3S	275.131	275.079	33	34	97.8	1.32	1.65	3	3	8	O=C(N[C@@H](c1ccccc1)B(O)O)Cc1cccs1	0	C256H90N72O75S+6	train
1pi5	general	Protein-Ligand	1.49	Ki=17nM	Ki	7.77	2004	beta-lactamase	SM2	P00811	C14H14BNO5S	319.141	319.069	36	37	135.1	1.93	1.34	3	5	8	O=C(N[C@@H](c1cccc(c1)C(=O)O)B(O)O)Cc1cccs1	0	C260H82N72O75S+6	train
1pig	general	Protein-Ligand	2.2	IC50=0.7nM	IC50	9.15	1996	alpha-amylase	8-mer	P00690	C37H66N2O26	954.918	954.39	131	136	471.23	-12.58	-13.67	19	17	31	OC[C@H]1O[C@H](O[C@@H]2[C@@H](CO)O[C@H]([C@@H]([C@H]2O)O)O)[C@@H]([C@H]([C@@H]1O[C@H]1O[C@H](C)[C@H]([C@@H]([C@H]1O)O)[NH2+][C@H]1C=C(CO)[C@H]([C@@H]([C@H]1O)O)O[C@H]1O[C@H](CO)[C@H]([C@@H]([C@H]1O)O)O[C@H]1O[C@H](C)[C@H]([C@@H]([C@H]1O)O)[NH3+])O)O	0	C370H125N109O105S3+9	train
1pkx	refined	Protein-Ligand	1.9	Ki=0.12uM	Ki	6.92	2004	bifunctional purine biosynthesis protein purh	XMP	P31939	C10H14N4O9P	365.213	365.05	38	40	216.74	-4.22	-3.3	4	8	5	O=c1[nH]c(=O)c2c([nH]1)n(cn2)[C@@H]1O[C@@H]([C@H]([C@H]1O)O)COP(O)(O)O	0	C294H99N81O82S2+7	valid
1pl0	general	Protein-Ligand	2.6	Ki=6nM	Ki	8.22	2004	bifunctional purine biosynthesis protein purh	BW2	P31939	C15H13N5O4S	359.36	359.069	38	40	169.41	-0.48	2.84	4	4	4	NC(=O)c1ccc(cc1)S(=O)(=O)Nc1ccc2c(c1)c(=O)[nH]c(n2)N	0	C321H123N104O103S2+12	valid
1pme	refined	Protein-Ligand	2	Ki=0.4nM	Ki	9.4	1999	erk2 map kinase	SB2	P28482	C21H16FN3OS	377.435	377.1	43	46	77.85	3.2	5.55	1	3	3	Fc1ccc(cc1)c1nc([nH]c1c1ccncc1)c1ccc(cc1)[S@@](=O)C	0	C306H92N74O79S4+7	test
1pmn	general	Protein-Ligand	2.2	IC50=7.1nM	IC50	8.15	2003	mitogen-activated protein kinase 10	984	P53779	C25H31Cl2N6	486.46	485.199	64	68	60.07	5.22	6.33	2	3	7	CCCn1c(nc(c1c1ccnc(n1)NC1CC1)c1ccc(c(c1)Cl)Cl)[C@@H]1CC[N@H+](CC1)C	0	C327H92N84O83S5+8	train
1pmu	general	Protein-Ligand	2.7	IC50=590nM	IC50	6.23	2003	mitogen-activated protein kinase 10	9HP	P53779	C18H12N2O	272.301	272.095	33	36	46.01	3.64	4.16	1	3	2	Oc1ccc(cc1)c1cnc2c(c1)c1cnccc1cc2	0	C248H78N66O70S5+6	train
1pmv	general	Protein-Ligand	2.5	IC50=150nM	IC50	6.82	2003	mitogen-activated protein kinase 10	537	P53779	C14H8N2O	220.226	220.064	25	28	45.75	2.73	2.67	1	2	0	O=c1c2ccccc2c2c3c1cccc3[nH]n2	0	C217H71N55O62S5+4	train
1pop	general	Protein-Ligand	2.1	Kd=1nM	Kd	9	1993	papain	4-mer	P00784	C20H41N6O4	429.577	429.319	71	70	173.54	2.33	0.25	4	4	18	OC[C@@H](NC(=O)[C@@H](NC(=O)[C@@H](NC(=O)C)CC(C)C)CC(C)C)CCC[NH+]=C(N)N	0	C259H70N68O76S3+2	test
1pot	refined	Protein-Ligand	1.8	Kd=3.2uM	Kd	5.49	1996	spermidine/putrescine-binding protein	SPD	P0AFK9	C7H22N3	148.27	148.181	32	31	71.89	-1.01	-2.8	3	0	7	[NH3+]CCC[NH2+]CCCC[NH3+]	0	C314H101N73O98S3+	valid
1ppc	refined	Protein-Ligand	1.8	Ki=0.69uM	Ki	6.16	1994	trypsin beta	MID	P00760	C27H32N5O4S	522.639	522.218	69	72	155.57	4.64	2.82	2	4	11	O=C(N[C@@H](C(=O)N1CCCCC1)Cc1ccc(cc1)C(=[NH2+])N)CNS(=O)(=O)c1ccc2c(c1)cccc2	0	C283H97N74O90S6+4	train
1pph	refined	Protein-Ligand	1.9	Ki=1.2uM	Ki	5.92	1994	trypsin beta	0ZG	P00760	C22H29N4O3S	429.556	429.196	59	61	126.47	4.4	2.47	1	3	8	Cc1ccc(cc1)S(=O)(=O)N[C@H](C(=O)N1CCCCC1)Cc1cccc(c1)C(=[NH2+])N	0	C254H89N65O79S5+3	valid
1ppi	refined	Protein-Ligand	2.2	Ki=9.7uM	Ki	5.01	1995	alpha-amylase	4-mer	P00690	C31H54NO23	808.753	808.309	109	113	404.9	-10.68	-11.77	17	16	28	OC[C@H]1O[C@H](O[C@@H]2C(=C[C@@H]([C@@H]([C@H]2O)O)[NH2+][C@@H]2[C@@H](C)O[C@@H]([C@@H]([C@H]2O)O)O[C@@H]2[C@@H](CO)O[C@H]([C@@H]([C@H]2O)O)O)CO)[C@@H]([C@H]([C@@H]1O[C@H]1O[C@H](CO)[C@H]([C@@H]([C@H]1O)O)O)O)O	0	C369H130N102O106S3+6	train
1ppk	refined	Protein-Ligand	1.8	Ki=22nM	Ki	7.66	1994	penicillopepsin	IVV	P00798	C24H47N3O7P	520.62	520.315	82	81	167.65	2.95	3.37	3	6	19	CCOC(=O)CP([C@@H](NC(=O)[C@H](C(C)C)NC(=O)[C@H](C(C)C)NC(=O)CC(C)C)CC(C)C)(O)O	0	C359H120N91O124+	test
1ppl	refined	Protein-Ligand	1.7	Ki=2.8nM	Ki	8.55	1993	penicillopepsin	1Z7	P00798	C30H51N3O8P	612.715	612.341	93	93	176.88	4.62	4.52	3	6	21	COC(=O)[C@@H](OP([C@@H](NC(=O)[C@H](C(C)C)NC(=O)[C@H](C(C)C)NC(=O)CC(C)C)CC(C)C)(O)O)Cc1ccccc1	0	C362H122N89O123+	train
1ppm	refined	Protein-Ligand	1.7	Ki=1600nM	Ki	5.8	1993	penicillopepsin	0P1	P00798	C29H41N3O9P	606.624	606.258	83	84	186.11	3.32	4.02	3	6	20	COC(=O)[C@@H](OP([C@@H](NC(=O)[C@@H](NC(=O)[C@@H](NC(=O)OCc1ccccc1)C)C)CC(C)C)(O)O)Cc1ccccc1	0	C365H124N91O129S	valid
1ppw	general	Protein-Ligand	2.21	IC50=50uM	IC50	4.3	2004	isopentenyl diphosphate delta-isomerase	EIP	Q46822	C5H14O8P2	264.107	264.016	29	28	167.02	-2.64	-0.73	1	6	6	OC/C(=C/COP(OP(O)(O)O)(O)O)/C	1	C266H104MgMnN78O83S2+11	train
1ppx	general	Protein-Ligand	NMR	Kd=52nM	Kd	7.28	2003	mutator mutt protein	8OG	P08337	C10H15N5O8P	364.229	364.066	39	41	222.53	-4.4	-2.1	4	6	4	O[C@H]1C[C@@H](O[C@@H]1COP(O)(O)O)n1c(=O)[nH]c2c1nc(N)[nH]c2=O	1	C215H72MgN56O56S+8	test
1pq3	general	Protein-Ligand	2.7	Ki=30nM	Ki	7.52	2003	arginase ii, mitochondrial precursor	S2C	P78540	C5H14BNO5S	211.044	211.069	27	26	150.93	-3.01	-2.67	4	5	8	OC(=O)[C@H](CSCC[B](O)(O)O)[NH3+]	1	C257H92Mn2N73O88+3	valid
1pq6	general	Protein-Ligand	2.4	IC50=7.94nM	IC50	8.1	2003	Ligand binding domain of HUMAN LXR BETA HORMONE RECEPTOR	965	P55055	C33H32ClF3NO3	583.06	582.202	73	76	50.97	7.33	6.67	1	2	12	OC(=O)Cc1cccc(c1)OCCC[N@@H+](CC(c1ccccc1)c1ccccc1)Cc1cccc(c1Cl)C(F)(F)F	0	C493H142N122O129S3+13	valid
1pqc	general	Protein-Ligand	2.8	IC50=0.1uM	IC50	7	2003	HUMAN LXR BETA HORMONE RECEPTOR	444	P55055	C17H12F9NO3S	481.333	481.039	43	44	65.99	4.94	5.84	1	3	6	FC(CN(S(=O)(=O)c1ccccc1)c1ccc(cc1)C(C(F)(F)F)(C(F)(F)F)O)(F)F	0	C410H131N91O95S2+8	train
1pr1	general	Protein-Ligand	2.3	Ki=5uM	Ki	5.3	2003	purine nucleoside phosphorylase	FMB	P0ABP9	C10H12N4O5	268.226	268.081	31	33	144.35	-2.47	-2.2	5	5	5	OC[C@H]1O[C@H]([C@@H]([C@@H]1O)O)c1n[nH]c2c1nc[nH]c2=O	0	C271H100N75O79S7+6	train
1pr5	refined	Protein-Ligand	2.5	Ki=120uM	Ki	3.92	2003	purine nucleoside phosphorylase	TBN	P0ABP9	C11H14N4O4	266.253	266.102	33	35	126.65	-1.34	-0.79	4	5	5	OC[C@H]1O[C@H]([C@@H]([C@@H]1O)O)n1ccc2c1ncnc2N	0	C262H100N72O80S8+4	valid
1prl	general	Protein-Ligand	NMR	Kd=59uM	Kd	4.23	1995	c-src (sh3 domain)	9-mer	P00523	C48H80N15O10	1027.24	1026.62	153	156	403.39	1.5	-2.76	6	10	33	CC(C[C@@H](C(=O)N1CCC[C@H]1C(=O)N[C@H](C(=O)N[C@H](C(=O)O)CCC[NH+]=C(N)N)CCC[NH+]=C(N)N)NC(=O)[C@@H]1CCCN1C(=O)[C@@H]1CCCN1C(=O)[C@@H](NC(=O)[C@H](Cc1ccccc1)NC(=O)[C@@H]([NH3+])C)C)C	0	C166H43N37O51+3	train
1prm	general	Protein-Ligand	NMR	Kd=59uM	Kd	4.23	1995	c-src (sh3 domain)	9-mer	P00523	C48H80N15O10	1027.24	1026.62	153	156	403.39	1.5	-2.76	6	10	33	CC(C[C@@H](C(=O)N1CCC[C@H]1C(=O)N[C@H](C(=O)N[C@H](C(=O)O)CCC[NH+]=C(N)N)CCC[NH+]=C(N)N)NC(=O)[C@@H]1CCCN1C(=O)[C@@H]1CCCN1C(=O)[C@@H](NC(=O)[C@H](Cc1ccccc1)NC(=O)[C@@H]([NH3+])C)C)C	0	C147H42N32O47+	train
1pro	refined	Protein-Ligand	1.8	Ki=5pM	Ki	11.3	1996	HIV-1 protease	A88	P12499	C34H38N3O6	584.682	584.276	81	85	107.14	4.86	4.97	4	4	13	COc1cc(ccc1O)CN1[N@H+](Cc2ccccc2)C[C@H]([C@H](N(C1=O)Cc1ccc(c(c1)OC)O)Cc1ccccc1)O	0	C344H109N91O95S2+6	train
1ps3	refined	Protein-Ligand	1.8	Ki=5.2mM	Ki	2.28	2003	alpha-mannosidase ii	KIF	Q24451	C8H12N2O6	232.191	232.07	28	29	130.33	-2.78	-4.01	5	6	5	OC[C@@H]1[C@@H](O)[C@H](O)[C@@H]([C@@H]2N1C(=O)C(=O)N2)O	1	C244H92N67O74Zn+6	test
1pu7	general	Protein-Ligand	1.93	Ki=0.8mM	Ki	3.1	2003	3-methyladenine dna glycosylase	39A	O25323	C7H10N5	164.188	164.094	22	23	60.61	-0.16	-0.04	1	2	0	Cn1cnc2c1[n+](C)cnc2N	0	C189H65N45O53+5	test
1pu8	general	Protein-Ligand	2.13	Ki=0.8mM	Ki	3.1	2003	3-methyladenine dna glycosylase	EA1	O25323	C7H6N5	160.156	160.062	18	20	61.46	1.19	0.02	2	2	0	c1nc2c([nH]1)c1[nH]cc[n+]1cn2	0	C183H73N44O50+3	valid
1pum	general	Protein-Ligand	2.3	IC50=0.9mM	IC50	3.05	2004	lectin i a chain	GLB	P81446	C6H12O6	180.156	180.063	24	24	110.38	-2.59	-3.22	5	5	6	OC[C@H]1O[C@@H](O)[C@@H]([C@H]([C@H]1O)O)O	0	C130H43N38O45+3	train
1pun	general	Protein-Ligand	NMR	Kd=52nM	Kd	7.28	2003	mutator mutt protein	8OG	P08337	C10H15N5O8P	364.229	364.066	39	41	222.53	-4.4	-2.1	4	6	4	O[C@H]1C[C@@H](O[C@@H]1COP(O)(O)O)n1c(=O)[nH]c2c1nc(N)[nH]c2=O	1	C190H60MgN49O52S+6	valid
1puq	general	Protein-Ligand	NMR	Kd=52nM	Kd	7.28	2003	mutator mutt protein	8OG	P08337	C10H15N5O8P	364.229	364.066	39	41	222.53	-4.4	-2.1	4	6	4	O[C@H]1C[C@@H](O[C@@H]1COP(O)(O)O)n1c(=O)[nH]c2c1nc(N)[nH]c2=O	1	C228H73MgN54O61S2+4	test
1pus	general	Protein-Ligand	NMR	Kd=52nM	Kd	7.28	2003	mutator mutt protein	8OG	P08337	C10H15N5O8P	364.229	364.066	39	41	222.53	-4.4	-2.1	4	6	4	O[C@H]1C[C@@H](O[C@@H]1COP(O)(O)O)n1c(=O)[nH]c2c1nc(N)[nH]c2=O	1	C248H81MgN61O64S+5	train
1pvn	refined	Protein-Ligand	2	Ki=0.15nM	Ki	9.82	2003	inosine-5'-monophosphate dehydrogenase	MZP	P50097	C9H15N3O9P	340.204	340.055	37	38	208.96	-4.08	-4.1	3	7	6	O[C@@H]1[C@H](O)[C@H](O[C@H]1N1CN=C(C1=O)C(=O)N)COP(O)(O)O	0	C333H113N94O102S5+7	train
1pw6	general	Protein-Ligand	2.6	IC50=6uM	IC50	5.22	2004	interleukin-2	FRB	P60568	C25H34Cl2N7O2	535.489	534.215	70	73	141.73	5.71	3.24	2	3	9	O=C(N1CC[C@H](CC1)c1[nH]nc(c1)c1cccc(c1Cl)Cl)CNC(=O)[C@@H](C1CCCCC1)NC(=[NH2+])N	0	C219H68N49O60S3+4	valid
1pwp	general	Protein-Ligand	2.9	Ki=0.5uM	Ki	6.3	2004	lethal factor	NSC	P15917	C21H20N6O	372.423	372.17	48	51	118.95	2.46	5.52	4	3	4	O=C(Nc1ccc2c(c1)c(N)cc(n2)C)Nc1ccc2c(c1)c(N)cc(n2)C	1	C294H104N75O95Zn+6	train
1pwu	general	Protein-Ligand	2.7	Ki=2.1uM	Ki	5.68	2004	lethal factor	GM6	P15917	C20H28N4O4	388.461	388.211	56	57	123.32	1.42	2.67	5	4	13	ONC(=O)C[C@H](C(=O)N[C@H](C(=O)NC)Cc1c[nH]c2c1cccc2)CC(C)C	1	C293H100N80O87SZn+9	train
1pwy	general	Protein-Ligand	2.8	Ki=90uM	Ki	4.05	2004	purine nucleoside phosphorylase	AC2	P00491	C8H11N5O3	225.205	225.086	27	28	119.05	-1.92	-0.75	3	3	5	OCCOCn1cnc2c1nc(N)[nH]c2=O	0	C282H87N74O82S4+5	test
1px4	refined	Protein-Ligand	1.6	Ki=0.59mM	Ki	3.23	2004	beta-galactosidase	IPT	P00722	C9H18O5S	238.301	238.087	33	33	115.45	-0.46	-1.07	4	4	7	OC[C@H]1O[C@@H](SC(C)C)[C@@H]([C@H]([C@H]1O)O)O	1	C258H111MgN78O83S7+6	train
1pxh	general	Protein-Ligand	2.15	Ki=1.8nM	Ki	8.74	2003	protein-tyrosine phosphatase, non-receptor type	SNA	P18031	C28H37F4N3O11P2	729.548	729.184	85	86	273.16	1.69	2.97	3	11	18	CCCCCNC(=O)[C@@H](NC(=O)[C@@H](NC(=O)Cc1ccc(cc1)C(P(O)(O)O)(F)F)CC(=O)O)Cc1ccc(cc1)C(P(O)(O)O)(F)F	0	C285H87N94O81S4+12	train
1pxi	general	Protein-Ligand	1.95	IC50=17uM	IC50	4.77	2003	cell division protein kinase 2	CK1	P24941	C8H5Cl2N3S	246.116	244.958	19	20	80.04	3.12	3.68	1	2	1	Nc1nccc(n1)c1cc(sc1Cl)Cl	0	C275H78N64O68+7	valid
1pxj	general	Protein-Ligand	2.3	IC50=13uM	IC50	4.89	2003	cell division protein kinase 2	CK2	P24941	C9H10N4S	206.267	206.063	24	25	92.93	1.38	2.38	1	3	1	Nc1nccc(n1)c1sc(nc1C)C	0	C279H80N65O70+7	test
1pxk	general	Protein-Ligand	2.8	IC50=2.2uM	IC50	5.66	2003	cell division protein kinase 2	CK3	P24941	C10H11N5OS	249.292	249.068	28	29	111.53	1.51	2.12	2	4	4	O/N=C\Nc1nccc(n1)c1sc(nc1C)C	0	C312H94N77O78+9	test
1pxl	general	Protein-Ligand	2.5	IC50=0.9uM	IC50	6.05	2003	cell division protein kinase 2	CK4	P24941	C16H13F3N4S	350.361	350.081	37	39	78.94	4.49	5.05	1	3	3	Cc1nc(c(s1)c1ccnc(n1)Nc1ccc(cc1)C(F)(F)F)C	0	C317H84N77O78S+10	train
1pxm	general	Protein-Ligand	2.53	Ki=0.06uM	Ki	7.22	2004	cell division protein kinase 2	CK5	P24941	C15H14N4OS	298.363	298.089	35	37	99.17	3.25	3.74	2	4	4	Oc1cccc(c1)Nc1nccc(n1)c1sc(nc1C)C	0	C320H87N78O78+11	valid
1pxn	refined	Protein-Ligand	2.5	Ki=0.07uM	Ki	7.15	2004	cyclin dependent kinase 2	CK6	P24941	C15H15N5OS	313.378	313.1	37	39	111.2	3.17	3.55	3	4	5	CNc1nc(c(s1)c1ccnc(n1)Nc1ccc(cc1)O)C	0	C326H86N79O79+9	test
1pxo	refined	Protein-Ligand	1.96	Ki=2.0nM	Ki	8.7	2004	cyclin dependent kinase 2	CK7	P24941	C14H12N6O2S	328.349	328.074	35	37	150.78	2.69	4.32	2	5	3	Nc1nc(c(s1)c1ccnc(n1)Nc1cccc(c1)N(=O)=O)C	0	C290H85N68O73+8	train
1pxp	refined	Protein-Ligand	2.3	Ki=0.22uM	Ki	6.66	2004	cyclin dependent kinase 2	CK8	P24941	C17H19N5S	325.431	325.136	42	44	82.18	3.73	4.1	1	3	4	Cc1nc(c(s1)c1ccnc(n1)Nc1ccc(cc1)N(C)C)C	0	C315H87N76O78+10	valid
1py1	general	Protein-Ligand	2.6	Kd=40uM	Kd	4.4	2003	adp-ribosylation factor binding protein gga1	7-mer	Q9UJY5 P56817	C35H66N8O16P	885.916	885.433	126	125	425.29	-3.35	-1.89	8	15	32	[NH3+]CCCC[C@@H](C(=O)O)NC(=O)[C@@H](NC(=O)[C@@H](NC(=O)[C@@H](NC(=O)[C@H]([C@H](CC)C)NC(=O)[C@@H](NC(=O)[C@H](CC(=O)O)[NH3+])CC(=O)O)COP(O)(O)O)CC(C)C)CC(C)C	0	C238H68N66O58S+11	valid
1py2	general	Protein-Ligand	2.8	IC50=0.06uM	IC50	7.22	2004	interleukin-2	FRH	P60568	C30H38Cl2N7O6	663.572	662.226	83	86	192.91	6.26	3.58	1	5	13	CC(C[C@H](C(=O)NCC(=O)N1CC[C@H](CC1)c1cc(nn1C)c1ccc(c(c1Cl)Cl)OCc1ccc(o1)C(=O)O)[NH+]=C(N)N)C	0	C238H65N50O63S5+5	train
1py5	general	Protein-Ligand	2.3	IC50=51nM	IC50	7.29	2004	tgf-beta receptor type i	PY1	P36897	C17H12N4	272.304	272.106	33	36	54.46	2.74	3.69	1	3	2	c1ccc(nc1)c1n[nH]cc1c1ccnc2c1cccc2	0	C313H96N78O85S+8	train
1pye	general	Protein-Ligand	2	Ki=386nM	Ki	6.41	2004	cell division protein kinase 2	PM1	P24941	C21H14F2N3O2	378.352	378.105	42	45	80.05	5.36	3.66	2	2	4	Fc1cccc(c1C(=O)c1ccc2[n+](c1)c(c([nH]2)N)C(=O)c1ccccc1)F	0	C285H73N68O65+10	train
1pyg	general	Protein-Ligand	2.87	Kd=3uM	Kd	5.52	1994	glycogen phosphorylase b	AMP	P00489	C10H15N5O7P	348.229	348.071	38	40	202.82	-3.71	-1.72	3	8	5	O[C@@H]1[C@H](O)[C@H](O[C@H]1n1cnc2c1ncnc2N)COP(O)(O)O	0	C289H97N90O79S2+14	train
1pyn	refined	Protein-Ligand	2.2	Ki=3.2uM	Ki	5.49	2003	tyrosine phosphatase 1b	941	P18031	C29H36N2O12	604.602	604.227	79	80	207.02	5.82	3.29	3	8	19	COC(=O)c1c(OCCCCNC(=O)[C@H](Cc2ccc(cc2)OC(C(=O)O)C(=O)O)NC(=O)OC(C)(C)C)cccc1O	0	C301H96N95O86S3+11	train
1pyw	general	Protein-Ligand	2.1	IC50=20nM	IC50	7.7	2003	hla class ii histocompatibility antigen	10-mer	P0A0L3 P03437 P01903 P01911	C47H77N12O13	1018.19	1017.57	149	149	404.23	-2.75	0.88	11	13	40	[NH3+]CCCC[C@@H](C(=O)N[C@H](C(=O)N[C@H](C(=O)N[C@H](C(=O)N([C@H](C(=O)N[C@H](C(=O)N[C@H](C(=O)O)CC(C)C)C)C)C)C)CC(=O)N)CCC(=O)N)NC(=O)[C@H](C(C)C)NC(=O)[C@H](Cc1ccccc1)NC(=O)C	0	C466H149N115O125S6+10	train
1pz5	refined	Protein-Ligand	1.8	Kd=4uM	Kd	5.4	2003	antibody fab	8-mer	P01801 A2NHM3	C41H59N12O12S2	976.11	975.382	126	128	444.1	-2.07	0.1	11	13	34	CSCC[C@@H](C(=O)N[C@H](C(=O)N[C@H](C(=O)N[C@H](C(=O)O)C)C)Cc1[nH]cnc1)NC(=O)[C@@H](NC(=O)[C@H](Cc1c[nH]c2c1cccc2)NC(=O)[C@@H](NC(=O)[C@H](CCSC)[NH3+])CC(=O)O)CC(=O)N	0	C313H92N83O86S2+4	train
1pzi	refined	Protein-Ligand	1.99	Kd=60uM	Kd	4.22	2004	heat-labile enterotoxin b	1DM	P32890	C13H17NO9	331.275	331.09	40	41	165.43	-1.29	-1.21	5	7	9	OC[C@H]1O[C@H](Oc2cc(CO)cc(c2)N(=O)=O)[C@@H]([C@H]([C@H]1O)O)O	0	C193H58N59O62S2+5	train
1pzj	general	Protein-Ligand	1.46	IC50=0.32mM	IC50	3.49	2004	cholera toxin b subunit	15B	Q57193	C23H40N5O9	530.592	530.283	77	79	210.82	-1.51	-1.64	8	7	16	[NH3+]CCC[N@@H+]1CC[N@H+](CC1)CCCNC(=O)c1cc(O[C@@H]2O[C@H](CO)[C@@H]([C@@H]([C@H]2O)O)O)cc(c1)N(=O)=O	0	C217H72N65O69S+7	train
1pzo	general	Protein-Ligand	1.9	Ki=480uM	Ki	3.32	2004	beta-lactamase	CBT	P62593	C15H13Cl2N5	334.203	333.055	35	37	57.7	4.25	3.71	1	3	5	Clc1ccc(cc1)CN(c1nnn[nH]1)Cc1ccc(cc1)Cl	0	C265H81N73O68S+7	train
1pzp	refined	Protein-Ligand	1.45	Ki=490uM	Ki	3.31	2004	beta-lactamase tem	FTA	P62593	C16H15N7	305.337	305.139	38	40	102.31	2.97	2.81	3	4	6	N#C[C@@H](c1n[nH]nn1)CNc1ccc(cc1)Nc1ccccc1	0	C229H72N61O57+6	train
1q0b	general	Protein-Ligand	1.9	IC50=6.7uM	IC50	5.17	2004	kinesin-like protein kif11	NAT	P52732	C14H16N2O3S	292.353	292.088	36	37	102.68	1.62	2.41	3	2	5	CCOC(=O)C1=C(C)NC(=S)N[C@H]1c1cccc(c1)O	0	C230H72N59O64S+6	test
1q1g	refined	Protein-Ligand	2.02	Kd=2.7nM	Kd	8.57	2004	uridine phosphorylase	MTI	Q8I3X4	C12H17N4O3S	297.353	297.102	37	39	143.91	-1.51	-0.11	5	3	5	CSC[C@H]1[NH2+][C@H]([C@@H]([C@@H]1O)O)c1c[nH]c2c1nc[nH]c2=O	0	C318H106N86O97S7+8	test
1q1m	general	Protein-Ligand	2.6	Ki=6.9uM	Ki	5.16	2003	protein-tyrosine phosphatase, non-receptor type	234	P18031	C21H16FNO7	413.353	413.091	46	48	119.09	4.93	3.76	1	5	8	COC(=O)c1c(OC/C=C/c2ccc(c(c2)c2onc(c2)C(=O)O)F)cccc1O	0	C272H86N87O78S3+11	train
1q1y	general	Protein-Ligand	1.9	IC50=0.02uM	IC50	7.7	2004	Peptide Deformylase from Staphylococcus aureus	BB2	P68826	C19H33N3O6	399.482	399.237	61	61	136.04	2.68	2.01	3	6	14	CCCCC[C@@H](C(=O)N[C@H](C(=O)N1CCC[C@H]1C(=O)O)C(C)C)CC(=O)NO	1	C307H104N77O83S4Zn+5	train
1q3w	general	Protein-Ligand	2.3	IC50=4nM	IC50	8.4	2003	glycogen synthase kinase-3 beta	ATU	P49841	C16H11N3O3	293.277	293.08	33	36	90.71	2.39	3.9	2	3	0	O=C1Nc2ccccc2c2c(C1)c1cc(ccc1[nH]2)N(=O)=O	0	C272H85N68O73S2+6	test
1q41	general	Protein-Ligand	2.1	IC50=22nM	IC50	7.66	2003	glycogen synthase kinase-3 beta	IXM	P49841	C16H11N3O2	277.277	277.085	32	35	73.72	2.57	2.93	3	2	1	O/N=C\1/C(=C\2/C(=O)Nc3c2cccc3)/Nc2c1cccc2	0	C281H83N76O71S2+8	train
1q4k	general	Protein-Ligand	2.3	Kd=280nM	Kd	6.55	2003	serine/threonine-protein kinase plk	6-mer	P53350	C28H52N7O13PS	757.79	757.308	102	102	373.78	-5.2	-2.07	7	12	26	CSCC[C@@H](C(=O)N[C@H](C(=O)N[C@H](C(=O)N[C@H](C(=O)N1CCC[C@H]1C(=O)N[C@H](C(=O)O)CC(C)C)[C@H](OP(O)(O)O)C)CO)CCC(=O)N)[NH3+]	0	C254H77N68O65S+8	train
1q4l	general	Protein-Ligand	2.77	Kd=40nM	Kd	7.4	2003	glycogen synthase kinase-3 beta	679	P49841	C17H12Cl2N2O4	379.194	378.017	37	39	95.5	4.34	3.31	2	4	3	Clc1cccc(c1)[C@H]1C(=O)NC(=O)[C@@H]1Nc1ccc(c(c1)C(=O)O)Cl	0	C287H82N75O75S2+8	train
1q4w	general	Protein-Ligand	1.93	Ki=0.35uM	Ki	6.46	2004	queuine trna-ribosyltransferase	DQU	P28720	C8H8N4O	176.175	176.07	21	22	97.79	-0.56	1.25	3	1	0	Nc1ccc2c(c1)c(=O)[nH]c(n2)N	0	C225H80N59O74S5+	test
1q4x	general	Protein-Ligand	2.8	Kd=0.33nM	Kd	9.48	2004	thyroid hormone receptor beta-1	G24	P10828	C24H24O4	376.445	376.167	52	54	66.76	6.59	4.65	1	3	7	OC(=O)COc1cc(C)c(c(c1)C)Cc1ccc(c(c1)Cc1ccccc1)O	0	C398H127N104O99S5+7	train
1q54	refined	Protein-Ligand	1.93	Ki=1.4uM	Ki	5.85	2003	isopentenyl diphosphate delta-isomerase	BHI	Q46822	C5H15BrO8P2	345.019	343.943	31	30	167.02	-2.21	-0.13	1	6	7	BrC[C@@](CCOP(OP(O)(O)O)(O)O)(O)C	1	C328H113MgMnN95O90S3+13	train
1q5k	refined	Protein-Ligand	1.94	Ki=38nM	Ki	7.42	2004	glycogen synthase kinase-3 beta	TMU	P49841	C12H12N4O4S	308.313	308.058	33	34	137.31	1.92	3.37	2	4	6	COc1ccc(cc1)CNC(=O)Nc1ncc(s1)N(=O)=O	0	C298H99N79O87S2+7	valid
1q5l	general	Protein-Ligand	NMR	Kd=600uM	Kd	3.22	2003	chaperone protein dnak	7-mer	P0A6Y8	C34H65N11O10	787.948	787.492	120	119	368.87	-1.3	-1.8	9	10	32	CC(C[C@@H](C(=O)N[C@H](C(=O)N[C@H](C(=O)NCC(=O)O)[C@H](O)C)CC(C)C)NC(=O)[C@@H](NC(=O)[C@@H](NC(=O)[C@H](CC(=O)N)[NH3+])CCC[NH+]=C(N)N)CC(C)C)C	0	C243H83N63O76S3+3	train
1q63	general	Protein-Ligand	1.85	Ki=1.4uM	Ki	5.85	2004	queuine tRNA-ribosyltransferase	AIQ	P28720	C12H12N6OS	288.328	288.079	32	34	151.77	-0.08	2.27	4	2	3	Nc1cc(CSc2ncc[nH]2)c2c(c1)c(=O)[nH]c(n2)N	0	C321H102N83O97S7+3	train
1q65	refined	Protein-Ligand	2.1	Ki=3.5uM	Ki	5.46	2004	queuine tRNA-ribosyltransferase	BHB	P28720	C13H20N5OS	294.396	294.139	40	41	127.53	-0.08	0.63	4	1	5	Nc1cc(CSCC[NH+](C)C)c2c(c1)c(=O)[nH]c(n2)N	0	C308H94N80O94S7+3	train
1q66	general	Protein-Ligand	1.75	Ki=1.7uM	Ki	5.77	2004	queuine tRNA-ribosyltransferase	KMB	P28720	C16H17N4OS	313.397	313.112	39	41	124.71	0.98	2.12	3	1	4	[NH3+]Cc1cc(CSc2ccccc2)c2c(c1)c(=O)[nH]c(n2)N	0	C305H95N77O95S7+	test
1q6j	general	Protein-Ligand	2.2	IC50=0.016uM	IC50	7.8	2003	protein-tyrosine phosphatase, non-receptor type	335	P18031	C29H27F4N3O6P2	651.482	651.131	71	75	179.27	3.58	5.24	0	8	8	OP(C(c1ccc(cc1)CC(n1nnc2c1cccc2)(c1ccccc1)Cc1ccc(cc1)C(P(O)(O)O)(F)F)(F)F)(O)O	0	C218H69N75O63S3+10	train
1q6k	general	Protein-Ligand	2.1	IC50=26nM	IC50	7.59	2004	cathepsin k	TCO	P43235	C13H23NO3	241.327	241.168	40	40	55.4	2.86	3.05	1	2	6	O=C[C@H](C1CCCCC1)NC(=O)OC(C)(C)C	0	C158H56N47O60S3+	valid
1q6m	general	Protein-Ligand	2.2	IC50=0.013uM	IC50	7.89	2003	protein-tyrosine phosphatase, non-receptor type	P27	P18031	C29H25F6N3O6P2	687.463	687.112	71	75	179.27	3.78	5.52	0	8	8	Fc1ccc(cc1F)C(n1nnc2c1cccc2)(Cc1ccc(cc1)C(P(O)(O)O)(F)F)Cc1ccc(cc1)C(P(O)(O)O)(F)F	0	C227H72N76O65S3+10	valid
1q6n	general	Protein-Ligand	2.1	IC50=0.023uM	IC50	7.64	2003	protein-tyrosine phosphatase, non-receptor type	P90	P18031	C31H26F2N4O3PS	603.599	603.143	68	73	146.12	6.17	6.92	0	6	8	OP(C(c1ccc(cc1)C[C@@](n1nnc2c1cccc2)(c1nc2c(s1)cccc2)C/C=C/c1ccccc1)(F)F)(O)O	0	C257H83N82O72S3+10	train
1q6p	general	Protein-Ligand	2.3	IC50=3nM	IC50	8.52	2003	protein-tyrosine phosphatase, non-receptor type	213	P18031	C34H31F2N3O6P2	677.571	677.166	78	83	179.27	4.53	5.48	0	8	8	OP(c1cccc(c1)c1ccc(cc1)C[C@](n1nnc2c1cccc2)(c1ccccc1)Cc1ccc(cc1)C(P(O)(O)O)(F)F)(O)O	0	C273H89N88O78S3+12	test
1q6s	general	Protein-Ligand	2.2	IC50=12nM	IC50	7.92	2003	protein-tyrosine phosphatase, non-receptor type	214	P18031	C38H34F2N4O6P2	742.644	742.192	86	92	192.16	5.2	6.34	0	9	8	Cc1ccc2c(n1)c(cc(c2)c1ccc(cc1)C[C@](n1nnc2c1cccc2)(c1ccccc1)Cc1ccc(cc1)C(P(O)(O)O)(F)F)P(O)(O)O	0	C298H99N97O87S4+13	valid
1q6t	general	Protein-Ligand	2.3	IC50=5nM	IC50	8.3	2003	protein-tyrosine phosphatase, non-receptor type	600	P18031	C43H44F2N4O7P2	828.776	828.265	102	108	201.39	6.21	7.76	0	9	12	CO[C@H](c1ccc2c(n1)c(cc(c2)c1ccc(cc1)C[C@](n1nnc2c1cccc2)(c1ccccc1)Cc1ccc(cc1)C(P(O)(O)O)(F)F)P(O)(O)O)CC(C)C	0	C322H102N100O88S5+13	valid
1q72	refined	Protein-Ligand	1.7	Kd=0.14uM	Kd	6.85	2003	antibody fab fragment	COC		C17H22NO4	304.361	304.155	44	46	57.04	2.49	2.02	1	2	5	COC(=O)[C@H]1[C@H](C[C@H]2[N@@H+]([C@@H]1CC2)C)OC(=O)c1ccccc1	0	C267H77N73O69S+6	train
1q7a	refined	Protein-Ligand	1.6	Kd=64nM	Kd	7.19	2004	phospholipase a2	OPB	P59071	C19H20N2O3	324.374	324.147	44	46	60.85	4.09	3.62	1	3	6	CCCC[C@H]1C(=O)N(N(C1=O)c1ccc(cc1)O)c1ccccc1	0	C256H77N61O71S9+6	train
1q83	general	Protein-Ligand	2.65	Ki=410fM	Ki	12.39	2004	acetylcholinesterase	TZ5	P21836	C42H45N8	661.86	661.377	95	102	111.55	8.29	9.28	3	3	12	Nc1ccc2c(c1)[n+](CCCCCCc1cnnn1CCNc1c3CCCCc3nc3c1cccc3)c(c1c2ccc(c1)N)c1ccccc1	0	C537H150N117O144S2+3	test
1q84	refined	Protein-Ligand	2.45	Ki=8900fM	Ki	11.05	2004	acetylcholinesterase	TZ4	P21836	C42H45N8	661.86	661.377	95	102	111.55	8.29	9.28	3	3	12	Nc1ccc2c(c1)[n+](CCCCCCc1nnn(c1)CCNc1c3CCCCc3nc3c1cccc3)c(c1c2ccc(c1)N)c1ccccc1	0	C504H149N115O135S2+4	valid
1q8t	refined	Protein-Ligand	2	Kd=17.5uM	Kd	4.76	2003	cyclin dependent kinase 2	Y27	P00517 P61925	C14H22N3O	248.344	248.176	40	41	69.63	0.95	1.53	2	2	4	C[C@H]([C@@H]1CC[C@H](CC1)C(=O)Nc1ccncc1)[NH3+]	0	C335H106N82O96S5+6	train
1q8u	refined	Protein-Ligand	1.9	Kd=1.1uM	Kd	5.96	2003	cyclin dependent kinase 2	H52	P63249 P00517	C16H22N3O2S	320.43	320.143	44	46	75.26	1.75	3.48	1	3	2	C[C@H]1C[NH2+]CCCN1S(=O)(=O)c1cccc2c1c(C)cnc2	0	C330H103N83O98S5+8	train
1q8w	refined	Protein-Ligand	2.2	Kd=5.7uM	Kd	5.24	2003	cyclin dependent kinase 2	M77	P61926 P00517	C14H18N3O2S	292.377	292.112	38	40	75.26	0.95	2.78	1	3	2	O=S(=O)(c1cccc2c1ccnc2)N1CC[NH2+]CCC1	0	C330H101N79O96S5+6	train
1q91	refined	Protein-Ligand	1.6	Ki=70uM	Ki	4.15	2004	5(3)-deoxyribonucleotidase	DPB	Q9NPB1	C17H20N2O8P	411.323	411.096	48	51	156.83	-1.1	0.1	1	5	2	O=c1[nH]c(=O)n(cc1C)[C@H]1C[C@@H]2[C@H](O1)CO[C@@](O2)(c1ccccc1)P(O)(O)O	1	C274H98MgN67O77S4+6	train
1q95	general	Protein-Ligand	2.46	Ki=27nM	Ki	7.57	2004	aspartate carbamoyltransferase	PAL	P0A786 P0A7F3	C6H11NO8P	256.127	256.022	27	26	177.98	-0.96	-1.84	1	8	4	O=C(CP(O)(O)O)N[C@H](C(=O)O)CC(=O)O	0	C320H115N101O98S+12	test
1q9d	general	Protein-Ligand	2.35	Kd=25uM	Kd	4.6	2003	fructose-1,6-bisphosphatase	OI1	P00636	C32H35N3O5	541.637	541.258	75	79	110.18	4.49	3.6	3	5	12	CCC[C@H](N1C(=O)[C@@H]2Cc3ccccc3CN2C(=O)[C@@H]1Cc1ccc(cc1)O)C(=O)NCCc1ccc(cc1)O	0	C197H72N51O57S+5	valid
1q9m	general	Protein-Ligand	2.3	IC50=0.33uM	IC50	6.48	2003	camp-specific phosphodiesterase pde4d2	ROL	Q08499	C16H21NO3	275.343	275.152	41	43	47.56	2.21	2.95	1	1	4	COc1ccc(cc1OC1CCCC1)[C@@H]1CNC(=O)C1	1	C357H119N92O97S5Zn2+9	train
1qan	refined	Protein-Ligand	2.4	Ki=33uM	Ki	4.48	2000	methyltransferase Ermc	SAH	P13956	C14H21N6O5S	385.419	385.129	47	49	209.55	-3.47	-1.57	4	7	8	OC(=O)[C@H](CCSC[C@H]1O[C@H]([C@@H]([C@@H]1O)O)n1cnc2c1ncnc2N)[NH3+]	0	C323H108N77O85S+8	train
1qaq	general	Protein-Ligand	2.8	Ki=18uM	Ki	4.74	2000	ermc' methyltransferase	SFG	P13956	C15H25N7O5	383.403	383.192	52	54	211.89	-4.28	-2.92	5	7	8	OC(=O)[C@H](CC[C@@H](C[C@H]1O[C@H]([C@@H]([C@@H]1O)O)n1cnc2c1ncnc2N)[NH3+])[NH3+]	0	C339H109N80O90S2+6	train
1qaw	refined	Protein-Ligand	2.5	Kd=7.5uM	Kd	5.12	1999	trp rna-binding attenuation protein	TRP	Q9X6J6	C11H13N2O2	205.233	205.098	28	29	80.73	-0.4	0.41	2	2	2	OC(=O)[C@H](Cc1c[nH]c2c1cccc2)[NH3+]	0	C248H88N72O70+10	train
1qb1	refined	Protein-Ligand	1.8	Ki=170nM	Ki	6.77	2000	trypsin beta	974	P00760	C28H27F2N6O5	565.548	565.201	68	72	161.55	6.31	3.58	1	5	8	OC(=O)[C@@H]1CCCN(C1)c1c(F)c(Oc2cccc(c2)c2nccn2C)nc(c1F)Oc1cc(ccc1O)C(=[NH2+])N	0	C313H105N81O94S6+4	train
1qb6	refined	Protein-Ligand	1.8	Ki=870nM	Ki	6.06	2000	trypsin beta	623	P00760	C20H19F2N5O2	399.394	399.151	48	50	134.57	6.72	1.58	0	1	6	Fc1c(Oc2cccc(c2)C(=[NH2+])N)nc(c(c1C)F)Oc1cccc(c1)C(=[NH2+])N	0	C292H99N74O87S6+4	train
1qb9	refined	Protein-Ligand	1.8	Ki=36nM	Ki	7.44	2000	trypsin beta	806	P00760	C31H32N5O	490.619	490.261	69	74	92.86	7.08	5.04	0	0	6	CC(=N)N1CCC(CC1)Oc1ccc2c(c1)n(Cc1ccc3c(c1)cc(cc3)C(=[NH2+])N)c1c2cccc1	0	C303H105N80O94S7+4	train
1qbn	refined	Protein-Ligand	1.8	Ki=1400nM	Ki	5.85	2000	trypsin beta	688	P00760	C22H18N5O5	432.409	432.131	50	53	169.17	5.42	2.62	2	5	7	OC(=O)c1cc(Oc2cccc(c2)c2ncc[nH]2)nc(c1)Oc1cc(ccc1O)C(=[NH2+])N	0	C242H85N66O79S5+3	valid
1qbo	refined	Protein-Ligand	1.8	Ki=18nM	Ki	7.74	2000	trypsin beta	711	P00760	C27H31N6O	455.575	455.256	65	69	105.75	5.58	3.59	0	1	6	CC(=N)N1CCC(CC1)Oc1ccc2c(c1)n(Cc1ccc3c(c1)cc(cc3)C(=[NH2+])N)c(n2)C	0	C301H103N80O95S6+4	valid
1qbq	refined	Protein-Ligand	2.4	Ki=5nM	Ki	8.3	1999	protein farnesyltransferase	HFP	Q02293 Q04631	C15H28O4P	303.354	303.173	48	47	94.51	2.9	3.46	1	4	8	O[C@@H](P(O)(O)O)/C=C(/CC/C=C(/CCC=C(C)C)\C)\C	1	C337H113N85O86S5Zn+6	train
1qbr	refined	Protein-Ligand	1.8	Ki=0.027nM	Ki	10.57	1997	HIV-1 protease	XV6	P04585	C41H38N6O5S2	758.908	758.235	92	98	204.47	5.7	6.51	4	7	16	O[C@@H]1[C@@H](O)[C@@H](Cc2ccccc2)N(C(=O)N([C@@H]1Cc1ccccc1)Cc1cccc(c1)C(=O)Nc1nccs1)Cc1cccc(c1)C(=O)Nc1nccs1	0	C349H113N92O98S2+6	valid
1qbs	refined	Protein-Ligand	1.8	Ki=0.34nM	Ki	9.47	1997	HIV-1 protease	DMP	P04585	C35H38N2O5	566.687	566.278	80	84	104.47	3.53	3.93	4	5	14	OCc1ccc(cc1)CN1[C@H](Cc2ccccc2)[C@H](O)[C@H]([C@H](N(C1=O)Cc1ccc(cc1)CO)Cc1ccccc1)O	0	C347H113N92O97S2+6	test
1qbt	refined	Protein-Ligand	2.1	Ki=0.024nM	Ki	10.62	1997	HIV-1 protease	146	P04585	C49H44N8O5	824.924	824.343	106	114	179.57	6.77	7.35	6	7	16	O=C1N(Cc2cccc(c2)C(=O)Nc2nc3c([nH]2)cccc3)[C@H](Cc2ccccc2)[C@@H]([C@H]([C@H](N1Cc1cccc(c1)C(=O)Nc1nc2c([nH]1)cccc2)Cc1ccccc1)O)O	0	C290H104N80O89S+5	train
1qbu	refined	Protein-Ligand	1.8	Ki=0.058nM	Ki	10.24	1997	HIV-1 protease	846	P04585	C34H36N4O4S	596.739	596.246	79	84	134.24	4.76	4.94	3	5	13	O[C@@H]1[C@@H](O)[C@@H](Cc2ccccc2)N(C(=O)N([C@@H]1Cc1ccccc1)Cc1cccc(c1)C(=O)Nc1nccs1)CC1CC1	0	C321H103N87O91S2+6	train
1qbv	refined	Protein-Ligand	1.8	Ki=4100nM	Ki	5.39	1999	thrombin alpha	PPX	P28504 P00734	C21H28N5O2	382.479	382.224	56	58	101.97	1.28	0.86	3	3	10	[NH3+][C@@H](C(=O)N1CCC[C@H]1C(=O)NCCNc1ccncc1)Cc1ccccc1	0	C329H104N85O95S6+6	train
1qca	general	Protein-Ligand	2.2	Ki=5.4uM	Ki	5.27	1995	chloramphenicol acetyltransferase iii	FUA	P00484	C31H48O6	516.709	516.345	85	88	104.06	7.07	5.67	2	5	7	CC(=O)O[C@H]1C[C@]2([C@H](/C/1=C(\C(=O)O)/CCC=C(C)C)C[C@H]([C@@H]1[C@]2(C)CC[C@@H]2[C@]1(C)CC[C@H]([C@H]2C)O)O)C	0	C355H105N84O88S5+4	test
1qcp	general	Protein-Ligand	1.8	Ki=30nM	Ki	7.52	1999	trypsin beta	RWJ	P00760	C19H28N5O2S	390.523	390.196	55	57	156.47	3.76	1.93	2	3	10	NC(=[NH+]CCC[C@@H]([C@@H](c1nc2c(s1)cccc2)O)NC(=O)C1CCCC1)N	0	C220H75N59O71S4+	train
1qf0	refined	Protein-Ligand	2.2	Ki=42nM	Ki	7.38	1999	thermolysin	TI2	P00800	C27H28N2O5S	492.587	492.172	63	65	154.53	5.3	3.55	3	5	14	O=C([C@H](Cc1ccccc1)NC(=O)[C@H](Cc1ccccc1)S)N[C@H](C(=O)O)Cc1ccc(cc1)O	1	C304H115CaN77O103SZn+3	train
1qf1	refined	Protein-Ligand	2	Ki=48nM	Ki	7.32	1999	thermolysin	TI1	P00800	C19H28N2O4S	380.502	380.177	54	54	134.3	4.44	2.96	2	4	13	CCCCC[C@@H](C(=O)N[C@H](C(=O)N[C@H](C(=O)O)C)Cc1ccccc1)S	1	C297H111CaN76O98SZn+3	test
1qf2	refined	Protein-Ligand	2.06	Ki=1200nM	Ki	5.92	1999	thermolysin	TI3	P00800	C22H24N2O4S	412.502	412.146	53	55	125.51	3.91	2.79	1	4	9	S[C@H](C(=O)NCC(=O)N1[C@@H](CC[C@@H]1c1ccccc1)C(=O)O)Cc1ccccc1	1	C308H113CaN78O103SZn+3	test
1qf4	general	Protein-Ligand	2.2	IC50=0.665uM	IC50	6.18	1999	adenylosuccinate synthetase	RPD	P0A7D4	C13H24N3O13P	461.316	461.105	54	55	264.81	-6.49	-5.25	6	11	12	OC[N@@H+]([C@@H](C(=O)O)CCCN1C(=O)N[C@]2(C1=O)O[C@@H]([C@H]([C@H]2O)O)COP(O)(O)O)O	1	C363H127MgN119O111+12	train
1qf5	general	Protein-Ligand	2	IC50=0.043uM	IC50	7.37	1999	adenylosuccinate synthetase	RPL	P0A7D4	C13H24N3O13P	461.316	461.105	54	55	264.81	-6.49	-5.25	6	11	12	OC[N@@H+]([C@H](C(=O)O)CCCN1C(=O)N[C@]2(C1=O)O[C@@H]([C@H]([C@H]2O)O)COP(O)(O)O)O	1	C350H122MgN118O108+12	train
1qfs	general	Protein-Ligand	2	IC50=0.33nM	IC50	9.48	1999	prolyl oligopeptidase from porcine muscle	ZPR	P23687	C18H24N2O4	332.394	332.174	48	50	70.08	1.54	1.65	1	3	8	OC[C@@H]1CCCN1C(=O)[C@@H]1CCCN1C(=O)OCc1ccccc1	0	C317H111N93O92S4+7	train
1qft	refined	Protein-Ligand	1.25	Kd=1.7nM	Kd	8.77	2000	female-specific histamine binding protein 2	HSM	O77421	C5H10N3	112.153	112.087	18	18	56.32	-0.58	-0.81	2	1	2	C(c1c[nH]cn1)C[NH3+]	0	C257H89N55O75S+2	train
1qhc	refined	Protein-Ligand	1.7	Ki=27nM	Ki	7.57	1999	ribonuclease a	PUA	P61823	C19H31N7O20P4	801.379	801.057	81	85	465.98	-8.21	-3.46	3	16	13	O=c1ccn(c(=O)[nH]1)[C@H]1C[C@@H]([C@H](O1)COP(O)(O)O)OP(OP(OC[C@H]1O[C@H]([C@@H]([C@@H]1OP(O)(O)O)O)n1cnc2c1ncnc2N)(O)O)(O)O	0	C257H87N74O74S6+8	train
1qhr	general	Protein-Ligand	2.2	IC50=130nM	IC50	6.89	2000	thrombin alpha	157	P01050 P00734	C12H23N2O2	227.323	227.176	39	39	88.91	2.55	0.34	1	2	8	O=C[C@@H]([C@H]1CCC[C@@H]1O)CCCCC(=[NH2+])N	0	C300H96N74O86S5+4	train
1qi0	general	Protein-Ligand	2.1	Ki=4.5mM	Ki	2.35	2000	endoglucanase 5a	CBI	O85465	C12H22O11	342.296	342.116	45	46	189.53	-4.73	-5.4	8	8	12	OC[C@H]1O[C@@H](O)[C@@H]([C@H]([C@@H]1O[C@@H]1O[C@H](CO)[C@H]([C@@H]([C@H]1O)O)O)O)O	1	C233H87CaN65O76+4	train
1qin	refined	Protein-Ligand	2	Ki=10nM	Ki	8	1999	lactoylglutathione lyase	GIP	Q04760	C17H22IN4O8S	569.348	569.02	53	53	226.28	-0.86	0.28	4	8	14	O=C(N[C@H](C(=O)NCC(=O)O)CSC(=O)N(c1ccc(cc1)I)O)CC[C@@H](C(=O)O)[NH3+]	1	C354H104N91O89S6Zn+11	train
1qiw	general	Protein-Ligand	2.3	Kd=18nM	Kd	7.74	2000	calmodulin	DPD	P62157	C34H50N2O2	518.773	518.387	88	90	51.68	7.83	5.84	2	0	19	CCCCOc1cc(ccc1OCCCC)[C@H]([NH2+]CCC[NH2+]CCC(c1ccccc1)c1ccccc1)C	0	C396H128N93O120S7+9	valid
1qj1	general	Protein-Ligand	2	IC50=9nM	IC50	8.05	2000	thrombin	166	P01050 P00734	C22H27N2O3	367.461	367.202	54	56	109.14	4.5	2.25	2	3	10	O=C[C@@H]([C@@H]1[C@@H](O)Cc2c1cc(cc2)c1ccc(cc1)O)CCCCC(=[NH2+])N	0	C256H82N70O69S5+6	test
1qj6	general	Protein-Ligand	2.2	IC50=18nM	IC50	7.74	2000	thrombin	167	P01050 P00734	C23H29N2O3	381.488	381.218	57	59	98.14	4.83	2.55	1	2	10	O=C[C@@H]([C@@H]1[C@@H](O)Cc2c1ccc(c2)c1cccc(c1)OC)CCCCC(=[NH2+])N	0	C267H89N76O80S5+6	train
1qj7	general	Protein-Ligand	2.2	IC50=8nM	IC50	8.1	2000	thrombin	GR1	P01050 P00734	C27H36N3O3	450.593	450.276	69	71	109.22	5.05	3.03	1	3	13	O=C[C@@H]([C@@H]1[C@@H](O)Cc2c1ccc(c2)c1cccc(c1)C(=O)N(CC)CC)CCCCC(=[NH2+])N	0	C280H89N79O80S5+6	valid
1qja	general	Protein-Ligand	2	Kd=416nM	Kd	6.38	1999	14-3-3 protein zeta	8-mer	P63104	C44H75N13O13P	1025.12	1024.53	146	148	441.21	-2.48	-2	10	13	37	OC[C@@H](NC(=O)[C@@H]1CCCN1C(=O)[C@@H](NC(=O)[C@@H](NC(=O)[C@@H](NC(=O)[C@@H](NC(=O)[C@@H](NC(=O)[C@H](CCC[NH+]=C(N)N)[NH3+])CC(C)C)Cc1ccc(cc1)O)Cc1[nH]cnc1)COP(O)(O)O)CC(C)C)C	0	C309H97N78O81S+7	train
1qjb	general	Protein-Ligand	2	Ki=416nM	Ki	6.38	1999	14-3-3 protein zeta/delta	8-mer	P0DOJ7 P63104	C38H61N13O15P	970.943	970.415	128	130	478.51	-5.04	-4.98	10	15	33	OC[C@@H](C(=O)N[C@H](C(=O)N[C@H](C(=O)N[C@H](C(=O)N1CCC[C@H]1C(=O)N[C@H](C(=O)O)C)Cc1ccc(cc1)O)COP(O)(O)O)Cc1[nH]cnc1)NC(=O)[C@@H](NC(=O)[C@@H]([NH3+])C)CCC[NH+]=C(N)N	0	C362H109N94O98S3+8	train
1qji	refined	Protein-Ligand	2.14	Ki=14uM	Ki	4.85	2000	astacin	PKF	P07584	C37H54N5O9P	743.827	743.366	106	109	216.04	2.15	2.66	3	7	23	COC(=O)[C@@H]1CCCN1C(=O)[C@@H](CP([C@H](Cc1ccccc1)NC(=O)[C@@H](NC(=O)[C@@H]1CCCN1C(=O)OCc1ccccc1)CCCC[NH3+])(O)O)C	1	C401H121N104O117S5Zn+8	train
1qk3	refined	Protein-Ligand	1.65	Kd=7.1uM	Kd	5.15	1999	hypoxanthine-guanine phosphoribosyltransferase	5GP	Q26997	C10H15N5O8P	364.229	364.066	39	41	222.79	-4.54	-2.43	4	7	5	O[C@@H]1[C@H](O)[C@H](O[C@H]1n1cnc2c1nc(N)[nH]c2=O)COP(O)(O)O	0	C280H96N65O80S+5	train
1qk4	refined	Protein-Ligand	1.9	Kd=61uM	Kd	4.21	1999	hypoxanthine-guanine phosphoribosyltransferase	IMP	Q26997	C10H14N4O8P	349.214	349.055	37	39	196.77	-3.96	-2.59	3	7	5	O[C@@H]1[C@H](O)[C@H](O[C@H]1n1cnc2c1nc[nH]c2=O)COP(O)(O)O	0	C306H99N78O86S3+8	test
1qka	refined	Protein-Ligand	1.8	Kd=1200nM	Kd	5.92	1999	oligo-peptide binding protein	3-mer	P06202	C18H42N8O4	434.577	434.333	72	71	244.43	-2.19	-4.21	5	4	18	[NH3+]CCCC[C@@H](C(=O)N[C@H](C(=O)N[C@H](C(=O)O)CCCC[NH3+])CCC[NH+]=C(N)N)[NH3+]	0	C447H154N122O132S4+8	train
1qkb	refined	Protein-Ligand	1.8	Kd=45nM	Kd	7.35	1999	oligo-peptide binding protein	3-mer	P06202	C17H38N5O4	376.515	376.292	64	63	178.42	-2.13	-2.09	5	4	15	[NH3+]CCCC[C@@H](C(=O)N[C@H](C(=O)N[C@H](C(=O)O)CCCC[NH3+])C(C)C)[NH3+]	0	C422H149N114O128S3+7	valid
1qkn	general	Protein-Ligand	2.25	IC50=3.4nM	IC50	8.47	2000	rat oestrogen receptor beta ligand-binding domain (LBD)	RAL	Q62986	C28H28NO4S	474.591	474.174	62	66	99.44	6.09	6.23	3	3	9	Oc1ccc2c(c1)sc(c2C(=O)c1ccc(cc1)OCC[NH+]1CCCCC1)c1ccc(cc1)O	0	C340H98N77O87S11+6	train
1qkt	refined	Protein-Ligand	2.2	Kd=0.92nM	Kd	9.04	2000	estradiol receptor	EST	P03372	C18H24O2	272.382	272.178	44	47	40.46	3.9	3.61	2	2	2	Oc1ccc2c(c1)CC[C@@H]1[C@@H]2CC[C@]2([C@H]1CC[C@@H]2O)C	0	C320H92N74O80S9+4	train
1ql7	refined	Protein-Ligand	2.1	Kd=10uM	Kd	5	2000	trypsin	ZEN	P00760	C25H27ClN4O3S	499.025	498.149	61	65	82.2	3.42	4.66	0	4	5	Clc1ccc2c(c1)ccc(c2)S(=O)(=O)N1CCN(CC1)C(=O)C1CCN(CC1)c1ccncc1	0	C266H96N72O85S6+4	train
1ql9	refined	Protein-Ligand	2.3	Ki=4.45uM	Ki	5.35	2000	trypsin	ZEN	P00763	C25H27ClN4O3S	499.025	498.149	61	65	82.2	3.42	4.66	0	4	5	Clc1ccc2c(c1)ccc(c2)S(=O)(=O)N1CCN(CC1)C(=O)C1CCN(CC1)c1ccncc1	0	C280H97N71O84S6+4	test
1qm4	general	Protein-Ligand	2.66	Ki=50uM	Ki	4.3	2000	methionine adenosyltransferase, alpha form	AMB	P13444	C5H10NO3	132.138	132.066	19	18	74.17	-2.05	-1.16	1	2	2	CO/C=C\[C@H]([NH3+])C(=O)O	1	C171H64Mg2N48O53+5	test
1qm5	general	Protein-Ligand	2	Ki=1.5uM	Ki	5.82	2000	maltodextrin phosphorylase	5-mer	P00490	C30H52O25S	844.784	844.252	108	112	443.05	-10.37	-11.21	17	17	30	OC[C@H]1O[C@H](O[C@@H]2[C@@H](CO)O[C@@H]([C@@H]([C@H]2O)O)O[C@@H]2[C@@H](CO)O[C@H]([C@@H]([C@H]2O)O)O)[C@@H]([C@H]([C@@H]1O[C@H]1O[C@H](CO)[C@H]([C@@H]([C@H]1O)O)S[C@H]1O[C@H](CO)[C@H]([C@@H]([C@H]1O)O)O)O)O	0	C383H114N110O107S3+10	valid
1qon	general	Protein-Ligand	2.72	Ki=1.09nM	Ki	8.96	2000	acetylcholinesterase	I40	P07140	C20H19IN2	414.283	414.059	42	45	24.92	5.55	5.4	1	1	3	Ic1cccc(c1)CNc1c2CCCCc2nc2c1cccc2	0	C397H115N81O101S2+4	train
1qpb	general	Protein-Ligand	2.4	Kd=44mM	Kd	1.36	2000	pyruvate decarboxylase	PYM	P06169	C3H5NO2	87.077	87.032	11	10	60.16	-0.98	-0.24	1	2	1	NC(=O)C(=O)C	0	C200H73N46O50+4	valid
1qpe	general	Protein-Ligand	2	IC50=20nM	IC50	7.7	2000	lck kinase	PP2	P06239	C15H16ClN5	301.774	301.109	37	39	69.62	3.02	4.07	1	3	2	Clc1ccc(cc1)c1nn(c2c1c(N)ncn2)C(C)(C)C	0	C276H85N68O77S3+5	train
1qpf	general	Protein-Ligand	2.5	IC50=27nM	IC50	7.57	1999	fk506 binding protein (fkbp)	858	P62942	C53H78N2O12	935.193	934.555	145	150	172.29	8.05	7.54	2	6	11	CO[C@@H]1C[C@@H](CC[C@H]1Oc1ccc2c(c1)ccn2CC)/C=C(/[C@H]1OC(=O)[C@@H]2CCCCN2/[C](/O)=[C](\O)/[C@]2(O)O[C@H]([C@H](C[C@H](C/C(=C/[C@H](C(=O)C[C@@H]([C@H]1C)O)CC)/C)C)OC)[C@H](C[C@H]2C)OC)\C	0	C241H74N58O56S2+6	train
1qq9	general	Protein-Ligand	1.53	Ki=8.7mM	Ki	2.06	2000	aminopeptidase	MET	P80561	C5H12NO2S	150.219	150.059	21	20	90.24	-1.47	-0.57	1	2	3	CSCC[C@H]([NH3+])C(=O)O	1	C210H78N55O75SZn2+3	valid
1qs4	general	Protein-Ligand	2.1	IC50=2.3uM	IC50	5.64	1999	hiv-1 integrase	100	P12497	C12H8ClN5O2	289.677	289.037	28	30	104.39	1.76	1.79	2	5	4	Clc1ccc2c(c1)c(c[nH]2)C(=O)CC(=O)c1n[nH]nn1	1	C145H60MgN37O48S2+3	train
1qsc	general	Protein-Ligand	2.4	Kd=210uM	Kd	3.68	1999	tnf receptor associated factor 2	7-mer	Q12933	C36H53N7O13	791.845	791.37	109	110	323.96	1.16	0.6	8	13	28	CC[C@@H]([C@@H](C(=O)N[C@H](C(=O)N[C@H](C(=O)N[C@H](C(=O)O)[C@H](O)C)CCC(=O)O)CCC(=O)N)NC(=O)[C@@H]1CCCN1C(=O)[C@H](Cc1ccc(cc1)O)NC(=O)C)C	0	C206H60N54O59S+4	test
1qti	general	Protein-Ligand	2.5	IC50=0.36uM	IC50	6.44	1999	acetylcholinesterase	GNT	P04058	C17H22NO3	288.361	288.16	43	46	43.13	1.84	2	2	1	2	COc1ccc2c3c1O[C@@H]1[C@@]3(CC[N@H+](C2)C)C=C[C@@H](C1)O	0	C389H118N87O102S3+2	train
1qtn	general	Protein-Ligand	1.2	IC50=50nM	IC50	7.3	2000	caspase-8	5-mer	Q14790	C21H34N4O11	518.515	518.222	70	69	248.53	1.87	-0.64	5	11	18	CC[C@@H]([C@@H](C(=O)N[C@H](C(=O)N[C@H](C(=O)N[C@H](C(=O)O)CC(=O)O)[C@H](O)C)CCC(=O)O)NC(=O)C)C	0	C280H95N88O88S2+9	valid
1qvt	general	Protein-Ligand	2.89	Kd=42uM	Kd	4.38	2004	transcriptional regulator qacr	PRL	P0A0N4	C13H11N3	209.247	209.095	27	29	64.93	2.17	3.71	2	1	0	Nc1ccc2c(c1)nc1c(c2)ccc(c1)N	0	C244H82N56O72S+3	train
1qvu	general	Protein-Ligand	2.96	Kd=35uM	Kd	4.46	2004	transcriptional regulator qacr	PRL	P0A0N4	C13H11N3	209.247	209.095	27	29	64.93	2.17	3.71	2	1	0	Nc1ccc2c(c1)nc1c(c2)ccc(c1)N	0	C246H72N51O64S+4	train
1qw7	general	Protein-Ligand	1.9	Ki=0.25mM	Ki	3.6	2004	Parathion hydrolase	EBP	P0A434	C12H19O3P	242.251	242.107	35	35	45.34	2.06	3.76	0	1	6	CCOP(=O)(Cc1ccc(cc1)C)OCC	0	C188H55N54O48+5	train
1qwu	general	Protein-Ligand	2.03	Ki=0.6mM	Ki	3.22	2003	alpha-mannosidase ii	GUL	Q24451	C6H11FO5	182.147	182.059	23	23	90.15	-1.81	-2.24	4	4	5	OC[C@]1(F)OC[C@H]([C@H]([C@@H]1O)O)O	1	C244H84N61O71SZn+4	train
1qx1	general	Protein-Ligand	1.3	Ki=7.5mM	Ki	2.12	2003	alpha-mannosidase ii	FMF	Q24451	C6H11FO4	166.148	166.064	22	22	69.92	-1.04	-1.56	3	3	4	OC[C@H]1OC[C@H]([C@H]([C@@H]1O)O)F	1	C238H86N58O70SZn+4	train
1qxk	refined	Protein-Ligand	2.3	Ki=9.0uM	Ki	5.05	2003	tyrosine phosphatase 1b	429	P18031	C25H30N2O10	518.513	518.19	67	68	180.72	3.4	2.15	4	7	18	COC(=O)c1c(OCCCCNC(=O)[C@H](Cc2ccc(c(c2)O)OCC(=O)O)NC(=O)C)cccc1O	0	C280H92N89O80S3+11	train
1qxl	refined	Protein-Ligand	2.25	Ki=11nM	Ki	7.96	2004	adenosine deaminase	FR8	P56658	C27H31N5O3	473.567	473.243	66	69	115.17	2.54	4.69	3	4	14	OC[C@H](n1cnc(c1)C(=O)N)CCn1ccc2c1cc(cc2)NC(=O)CCCCc1ccccc1	1	C372H124N94O99S6Zn+8	test
1qxw	general	Protein-Ligand	1.67	IC50=7uM	IC50	5.15	2004	methionine aminopeptidase	M1C	P0A078	C10H24N2O2	204.31	204.184	38	38	84.71	0.43	-1.81	4	2	9	CCCC[C@@H](C(C[NH2+]C1CC1)(O)O)[NH3+]	1	C290H104Co2N79O85S+5	train
1qxy	general	Protein-Ligand	1.04	IC50=16uM	IC50	4.8	2004	methionine aminopeptidase	M2C	P0A078	C10H17N2O2S	229.319	229.101	32	32	106.29	-0.6	-0.42	3	3	7	CSCC[C@@H](C(c1ccccn1)(O)O)[NH3+]	1	C277H106Co3N75O84S+5	valid
1qxz	general	Protein-Ligand	1.68	IC50=19uM	IC50	4.72	2004	methionine aminopeptidase	M3C	P0A078	C8H15N2O2S2	235.347	235.057	29	29	134.53	-0.5	-0.36	3	3	7	CSCC[C@@H](C(c1nccs1)(O)O)[NH3+]	1	C267H107Co3N72O82S+5	train
1qy1	refined	Protein-Ligand	1.7	Kd=0.3uM	Kd	6.52	2004	major urinary protein	PRZ	P11588	C9H14N2O	166.22	166.111	26	26	35.01	1.71	1.68	0	2	3	COc1nccnc1CC(C)C	0	C318H95N68O74S3+4	train
1qy2	refined	Protein-Ligand	1.75	Kd=1.8uM	Kd	5.74	2004	major urinary protein	IPZ	P11588	C8H12N2O	152.194	152.095	23	23	35.01	1.25	1.61	0	2	2	COc1nccnc1C(C)C	0	C322H99N71O74S3+4	valid
1qyg	refined	Protein-Ligand	1.81	Kd=0.14uM	Kd	6.85	2003	FAB M82G2	BCG		C16H20NO4	290.334	290.139	41	43	68.04	1.08	1.93	1	3	3	O=C(c1ccccc1)O[C@H]1C[C@@H]2CC[C@H]([C@H]1C(=O)O)[N@H+]2C	0	C276H80N74O70S+6	train
1r0x	general	Protein-Ligand	2.2	Kd=149uM	Kd	3.83	2003	cystic fibrosis transmembrane conductance regulator	ATP	P26361	C10H19N5O13P3	510.205	510.019	50	52	329.38	-6.07	-2.36	3	12	9	O[C@@H]1[C@@H](COP(OP(OP(O)(O)O)(O)O)(O)O)O[C@H]([C@@H]1O)n1cnc2c1ncnc2N	1	C270H95MgN71O84S+7	valid
1r10	general	Protein-Ligand	3	Kd=149uM	Kd	3.83	2003	cystic fibrosis transmembrane conductance	ATP	P26361	C10H19N5O13P3	510.205	510.019	50	52	329.38	-6.07	-2.36	3	12	9	O[C@@H]1[C@@H](COP(OP(OP(O)(O)O)(O)O)(O)O)O[C@H]([C@@H]1O)n1cnc2c1ncnc2N	1	C259H89MgN63O78S+4	valid
1r17	general	Protein-Ligand	1.86	Kd=379nM	Kd	6.42	2003	fibrinogen-binding protein SdrG	16-mer	Q9KI13	C54H82N19O13	1205.35	1204.63	168	171	528.08	-2.32	-4.69	13	14	47	[NH3+]CC(=O)N[C@H](C(=O)N[C@H](C(=O)N[C@H](C(=O)N[C@H](C(=O)N[C@H](C(=O)N[C@H](C(=O)NCC(=O)N[C@H](C(=O)N[C@H](C(=O)N1CCC[C@H]1C(=O)O)CCC[NH+]=C(N)N)Cc1[nH]cnc1)CCC[NH+]=C(N)N)C)CO)Cc1ccccc1)Cc1ccccc1)C	1	C304H112CaN77O117S2+2	train
1r1h	refined	Protein-Ligand	1.95	Ki=1.2nM	Ki	8.92	2004	neprilysin	BIR	P08473	C21H29N2O5P	420.439	420.181	58	59	148.09	-0.14	1.91	2	5	9	C[C@@H](C(=O)O)NC(=O)[C@@H](CP([C@@H]([NH3+])C)(O)O)Cc1ccc(cc1)c1ccccc1	1	C396H122N96O101S2Zn+5	train
1r1i	general	Protein-Ligand	2.6	Ki=2.9nM	Ki	8.54	2004	neprilysin	TI1	P08473	C19H28N2O4S	380.502	380.177	54	54	134.3	4.44	2.96	2	4	13	CCCCC[C@H](C(=O)N[C@H](C(=O)N[C@H](C(=O)O)C)Cc1ccccc1)S	1	C331H110N88O92SZn+5	train
[truncated: 15,394 more rows]
