# Supplementary material for: MetalProGNet: a structure-based deep graph model for metalloprotein–ligand interaction predictions
Source: PubMed Central journal article supplement — Chem Sci. 2023 Jan 19;14(8):2054–69. doi: 10.1039/d2sc06576b (PMC9945430; doi:10.1039/d2sc06576b), 2023-01-19
Supplement: SC-014-D2SC06576B-s001.pdf [file SC-014-D2SC06576B-s001.pdf]

## Supporting Information

### 1. The Settings for the Docking Program

**AutoDock Vina:** The protein and ligand was prepared and outputted as PDBQT files by the AutoDock Tools with default parameters.<sup>1</sup> The binding pocket of protein was defined by the corresponding cocrystal ligands, where the docking grid box was set as 20 Å×20 Å×20 Å centering on the cocrystal ligand. During docking runs, the exhaustiveness was set to 32 while the energy range was kept as default. For each ligand, only the top-1 pose was retained.

**PLANTS:** SPORES program was used for structural preparation of protein and ligand under *complete* mode. The conformation was sampled under the *screen* mode on the basis of the ant colony optimization algorithm and then scored using the *CHEPLP* scoring functions, which contains additional term to account for hydrogen bonding and metal-acceptor interactions. The *search\_speed* parameter was set to speed 1. The center of binding site was set as the center of cocrystal ligand, and the radius of binding sphere was set as 20 Å. Similarly, only the top-1 pose was retained.

**Glide SP:** Glide SP is empirical scoring function-based docking program that can define metal constraints. The protein structure was prepared by *Protein Preparation Wizard* module in Schrödinger, and ligand was prepared by *LigPrep* module. The INNERBOX was set as 10 Å×10 Å×10 Å and the OUTERBOX was set as 30 Å×30 Å×30 Å. The docking center was adopted from the cocrystal ligand center. Finally, the other docking and scoring parameters was kept default, only the top-1 scored pose was retained for analysis.

### 2. The Detailed Descriptions of Baselines

**NNScore2.0:** NNScore2.0 is one of the most popular scoring functions for protein-ligand complex. The protein-ligand complex in NNScore2.0 is characterized by five Vina energy terms (“gauss 1”, “gauss 2”, “repulsion”, “hydrophobic” and “hydrogen-bond”) and BINANA binding characteristics. For the descriptions of metallic interactions, the number counting of metal-ligand atom pairs and energy summation of the electrostatic interaction between metal and ligand atoms are considered in BINANA. The NNScore2.0 algorithm was implemented in the ODDT python package with default parameters.<sup>2</sup>

**RosENet:** As the variation of ResNet-101 architecture, RosENet encodes molecular descriptors and atom energies into its inputs. The descriptors used in RosENet is calculated by HTMD Python library, and a total of 11 descriptors including aromatic carbon, hydrogen bond acceptor, positive ionizable, negative ionizable, metal ion, attractive, repulsive, positive electrostatic, negative electrostatic, positive implicit solvation, and negative implicit solvation are provided. Here all the available descriptors were employed in this study to systematically describe the properties of complex. We trained RosENet using the Adam optimizer with the loss function of RMSE and learning rate of  $10^{-4}$ , and the batch size was set as 128. Each 3D grid was augmented by 24 times for per protein-ligand complex to consider rotation translation and invariance. All the training scripts are based on <https://github.com/DS3Lab/RosENet>.<sup>3</sup>

**Physics-based Methods:** The scoring functions from PLANTS and Glide SP docking programs were used as baselines. And the MM/GBSA method was implemented by the *prime\_mmgbsa* utility in Schrödinger, and two calculation procedures with different force fields (OPLS2005 or OPLS3) were tested in this study. All other parameters were kept default.

## Reference

1. Morris, G. M.; Huey, R.; Lindstrom, W.; Sanner, M. F.; Belew, R. K.; Goodsell, D. S.; Olson, A. J., AutoDock4 and AutoDockTools4: Automated docking with selective receptor flexibility. *Journal of computational chemistry* **2009**, 30, 2785-2791.
2. Wójcikowski, M.; Zielenkiewicz, P.; Siedlecki, P., Open Drug Discovery Toolkit (ODDT): a new open-source player in the drug discovery field. *Journal of Cheminformatics* **2015**, 7, 26.
3. Hassan-Harrirou, H.; Zhang, C.; Lemmin, T., RosENet: Improving Binding Affinity Prediction by Leveraging Molecular Mechanics Energies with an Ensemble of 3D Convolutional Neural Networks. *Journal of Chemical Information and Modeling* **2020**, 60, 2791-2802.

**Table S1.** The detailed information of the independent test dataset containing about 25000 active ligands towards 22 metalloproteins.

| UniProt_ID | Metal Ion Type | Protein Family                               | K <sub>i</sub> Ligands | K <sub>d</sub> Ligands |
|------------|----------------|----------------------------------------------|------------------------|------------------------|
| O43570     | Zn             | Adenosine deaminase domain                   | 2691                   | 228                    |
| P00492     | Zn             | Alpha carbonic anhydrase domain              | 99                     | 0                      |
| P00742     | Zn             | Alpha carbonic anhydrase domain              | 2525                   | 4                      |
| P00915     | Zn             | Alpha carbonic anhydrase domain              | 4431                   | 268                    |
| P00918     | Zn             | Alpha carbonic anhydrase domain              | 4740                   | 352                    |
| P03956     | Zn             | Alpha carbonic anhydrase domain              | 525                    | 0                      |
| P08254     | Zn             | Alpha carbonic anhydrase domain              | 489                    | 4                      |
| P09237     | Zn             | Alpha carbonic anhydrase domain              | 101                    | 0                      |
| P22748     | Zn             | Alpha carbonic anhydrase domain              | 726                    | 138                    |
| P22894     | Zn             | Bcl-2, Bcl-2 homology region 1-3             | 319                    | 0                      |
| P24941     | Mg             | Gamma-carboxyglutamic acid-rich (GLA) domain | 192                    | 28                     |
| P25774     | Zn             | Hemopexin-like domain                        | 187                    | 47                     |
| P43166     | Zn             | Hemopexin-like domain                        | 703                    | 259                    |
| P45452     | Zn             | Hemopexin-like domain                        | 194                    | 0                      |
| P49841     | Zn             | Hemopexin-like domain                        | 214                    | 21                     |
| P56658     | Zn             | Peptidase C1A, papain C-terminal             | 240                    | 0                      |
| P98170     | Zn             | Peptidase M10, metallopeptidase              | 117                    | 49                     |
| P9WKE1     | Mg             | Phosphoribosyl transferase domain            | 137                    | 0                      |
| Q07820     | Mg             | Protein kinase                               | 641                    | 19                     |

|        |    |                                |      |     |
|--------|----|--------------------------------|------|-----|
| Q16790 | Mn | Protein kinase domain          | 3377 | 172 |
| Q8N1Q1 | Mg | Thymidylate kinase-like domain | 80   | 258 |
| Q9ULX7 | Zn | Zinc finger, RING-type         | 393  | 127 |

**Table S2.** The number of the training, validation and test complexes for different binding affinity models.

| Model Type       | Training | Validation | Test |
|------------------|----------|------------|------|
| Mixture Model    | 10212    | 3405       | 618  |
| Finetuning Model | 1845     | 616        | 618  |

**Table S3.** The detailed information of the training, validation and test targets used in the virtual screening power test of MetalProGNet.

| Training and Validation Targets (DUD-E)                           | Test Targets (DEKOIS)                      |
|-------------------------------------------------------------------|--------------------------------------------|
| ace, ada, cah2, def, fnta, hdac2, hdac8, lkha4, mp2k, pa2ga, comt | mmp2, adam17, pde5, sars-hcov, qpct, pde4b |

**Table S4.** The training hyper-parameters used for MetalProGNet.

| Hyperparameters | Explanation                                                     | Value |
|-----------------|-----------------------------------------------------------------|-------|
| batch_size      | the training batch_size                                         | 200   |
| n_FC_layer      | the number of hidden layers in MLP                              | 2     |
| d_FC_layer      | the number of hidden layers in MLP                              | 200   |
| dis_threshold   | the distance threshold for protein-ligand atom pair interaction | 8     |
| dropout         | dropout ratio                                                   | 0.25  |
| epochs          | the number of maximum epochs                                    | 500   |
| graph_feat_size | the hidden state size of covalent AAIN                          | 128   |
| l2              | L2 regularization                                               | 0     |
| lr              | learning rate                                                   | 0.001 |
| num_layers      | the number of hidden layers in covalent AAIN                    | 5     |

|           |                                                |     |
|-----------|------------------------------------------------|-----|
| outdim_g3 | the vector length for molecular binding vector | 200 |
| patience  | the training patience in early stopping        | 70  |

**Table S5.** Impacts of similarity on the MetalProGNet performance (finetuning model of crystal pose).<sup>a</sup>

| No. | R <sub>p</sub> | RMSE  |
|-----|----------------|-------|
| 618 | 0.680          | 1.321 |
| 587 | 0.664          | 1.331 |
| 556 | 0.649          | 1.340 |
| 525 | 0.649          | 1.348 |
| 494 | 0.648          | 1.356 |
| 463 | 0.642          | 1.367 |
| 432 | 0.637          | 1.385 |
| 401 | 0.636          | 1.399 |
| 370 | 0.636          | 1.366 |
| 339 | 0.616          | 1.389 |
| 308 | 0.605          | 1.407 |

<sup>a</sup>The similarity was measured by the Euclidean distance between two interaction fingerprints. For each complex in test set, the similarity was assigned by the minimum Euclidean distance (maximum similarity) with the 2461 training(validation) complexes. The test set complexes were ascendingly sorted according to the similarity, and each time 5 percent complexes (31 complexes or so) were removed from the test set and new metrics were calculated for the remaining unsimilar test complexes. The lower limit of the remaining unsimilar test complexes is set as 50 percent.

Modi fy 'CHEMBL' as 'ChEMBL'

**Table S6.** Comparison with other state-of-the-art baselines on the **CHEMBL** dataset.

| UniProt_I<br>D | Ki_Num | Kd_Num | MetalProGNet_Finetuning |                   | MetalProGNet_Mixture |                   | Rosenet_Mixture<br>Modi fy 'Rosenet' as 'RosENet' |                   | Rosenet_Finetuning |                   | NNScore2.0_Mixture |                   | NNScore2.0_Finetuning |                   |
|----------------|--------|--------|-------------------------|-------------------|----------------------|-------------------|---------------------------------------------------|-------------------|--------------------|-------------------|--------------------|-------------------|-----------------------|-------------------|
|                |        |        | Ki_R <sub>p</sub>       | Kd_R <sub>p</sub> | Ki_R <sub>p</sub>    | Kd_R <sub>p</sub> | Ki_R <sub>p</sub>                                 | Kd_R <sub>p</sub> | Ki_R <sub>p</sub>  | Kd_R <sub>p</sub> | Ki_R <sub>p</sub>  | Kd_R <sub>p</sub> | Ki_R <sub>p</sub>     | Kd_R <sub>p</sub> |
| O43570         | 2691   | 228    | 0.345                   | 0.249             | 0.298                | 0.064             | 0.128                                             | 0.366             | 0.151              | 0.409             | 0.286              | 0.328             | 0.312                 | 0.065             |
| P00492         | 99     | 0      | 0.246                   | —                 | 0.311                | —                 | 0.188                                             | —                 | 0.107              | —                 | 0.094              | —                 | 0.195                 | —                 |
| P00742         | 2525   | 0      | 0.289                   | —                 | 0.230                | —                 | 0.133                                             | —                 | 0.170              | —                 | 0.263              | —                 | 0.271                 | —                 |
| P00915         | 4431   | 268    | 0.170                   | 0.364             | 0.177                | 0.316             | 0.093                                             | -0.101            | 0.102              | -0.131            | 0.197              | 0.032             | 0.196                 | 0.338             |
| P00918         | 4740   | 352    | 0.340                   | 0.482             | 0.337                | 0.352             | 0.113                                             | 0.334             | 0.135              | 0.308             | 0.291              | 0.385             | 0.301                 | 0.387             |
| P03956         | 525    | 0      | 0.230                   | —                 | 0.178                | —                 | 0.103                                             | —                 | 0.146              | —                 | -0.150             | —                 | -0.038                | —                 |
| P08254         | 489    | 0      | 0.358                   | —                 | 0.488                | —                 | 0.412                                             | —                 | 0.384              | —                 | 0.132              | —                 | 0.017                 | —                 |
| P09237         | 101    | 0      | -0.023                  | —                 | 0.274                | —                 | 0.257                                             | —                 | 0.168              | —                 | 0.117              | —                 | 0.121                 | —                 |

|        |      |     |        |        |        |        |        |       |        |        |        |        |        |        |
|--------|------|-----|--------|--------|--------|--------|--------|-------|--------|--------|--------|--------|--------|--------|
| P22748 | 726  | 138 | 0.286  | 0.217  | 0.237  | 0.038  | 0.209  | 0.109 | 0.237  | 0.163  | 0.195  | 0.072  | 0.230  | 0.170  |
| P22894 | 319  | 0   | 0.375  | —      | 0.458  | —      | 0.268  | —     | 0.284  | —      | 0.251  | —      | 0.254  | —      |
| P24941 | 192  | 28  | 0.334  | 0.569  | 0.261  | 0.718  | 0.185  | 0.630 | 0.238  | 0.611  | 0.269  | 0.628  | 0.299  | 0.662  |
| P25774 | 187  | 47  | 0.205  | -0.473 | 0.065  | -0.207 | 0.067  | 0.226 | 0.037  | 0.395  | 0.120  | -0.063 | 0.189  | -0.045 |
| P43166 | 703  | 259 | 0.411  | 0.221  | 0.407  | -0.035 | 0.226  | 0.185 | 0.235  | 0.149  | 0.367  | 0.058  | 0.400  | -0.054 |
| P45452 | 194  | 0   | 0.105  | —      | 0.201  | —      | 0.116  | —     | 0.163  | —      | -0.017 | —      | 0.019  | —      |
| P49841 | 214  | 21  | 0.134  | -0.038 | 0.068  | 0.193  | 0.207  | 0.341 | 0.283  | 0.577  | 0.257  | -0.043 | 0.202  | -0.422 |
| P56658 | 240  | 0   | 0.255  | —      | 0.213  | —      | 0.321  | —     | 0.306  | —      | 0.279  | —      | 0.396  | —      |
| P98170 | 117  | 49  | -0.167 | 0.203  | -0.104 | 0.341  | -0.127 | 0.243 | -0.125 | 0.270  | -0.285 | 0.384  | -0.297 | 0.306  |
| P9WKE1 | 137  | 0   | 0.292  | —      | 0.483  | —      | 0.339  | —     | 0.451  | —      | 0.336  | —      | 0.204  | —      |
| Q07820 | 641  | 19  | 0.357  | 0.419  | 0.547  | 0.488  | 0.508  | 0.359 | 0.480  | 0.419  | 0.551  | 0.150  | 0.326  | 0.125  |
| Q16790 | 3377 | 172 | 0.314  | 0.023  | 0.283  | 0.042  | 0.069  | 0.265 | 0.089  | 0.230  | 0.210  | 0.160  | 0.200  | 0.002  |
| Q8N1Q1 | 80   | 258 | 0.726  | 0.057  | 0.631  | -0.080 | 0.083  | 0.001 | 0.116  | -0.023 | 0.465  | 0.010  | 0.613  | 0.013  |
| Q9ULX7 | 393  | 127 | 0.453  | 0.166  | 0.426  | 0.061  | 0.149  | 0.074 | 0.199  | 0.038  | 0.344  | 0.050  | 0.459  | 0.046  |

**Table S7.** The performance of the PLANTS scoring function and MM/GBSA on the **CHEMBL** dataset. Modify 'CHEMBL' as 'ChEMBL'

| UniProt_ID | Ki_Num | Kd_Num | PLANTS |        | MM/GBSA<br>(OPLS_2005) |        | MM/GBSA<br>(OPLS3e) |        |
|------------|--------|--------|--------|--------|------------------------|--------|---------------------|--------|
|            |        |        | Ki_Rp  | Kd_Rp  | Ki_Rp                  | Kd_Rp  | Ki_Rp               | Kd_Rp  |
| O43570     | 2691   | 228    | -0.145 | 0.113  | 0.009                  | 0.497  | 0.094               | 0.354  |
| P00492     | 99     | 0      | 0.485  | —      | 0.358                  | —      | 0.294               | —      |
| P00742     | 2525   | 0      | 0.087  | —      | 0.188                  | —      | 0.218               | —      |
| P00915     | 4431   | 268    | -0.025 | -0.046 | 0.042                  | -0.155 | 0.097               | -0.024 |
| P00918     | 4740   | 352    | -0.071 | -0.092 | 0.083                  | 0.233  | 0.104               | 0.099  |
| P03956     | 525    | 0      | -0.240 | —      | -0.167                 | —      | -0.094              | —      |
| P08254     | 489    | 0      | 0.243  | —      | 0.145                  | —      | -0.011              | —      |
| P09237     | 101    | 0      | 0.226  | —      | 0.174                  | —      | 0.029               | —      |
| P22748     | 726    | 138    | 0.033  | 0.089  | 0.041                  | 0.246  | 0.089               | 0.264  |
| P22894     | 319    | 0      | 0.207  | —      | -0.011                 | —      | -0.092              | —      |
| P24941     | 192    | 28     | -0.332 | 0.319  | 0.155                  | 0.247  | 0.147               | 0.065  |
| P25774     | 187    | 47     | -0.151 | 0.042  | 0.156                  | 0.235  | 0.107               | 0.375  |
| P43166     | 703    | 259    | -0.080 | -0.069 | 0.057                  | 0.136  | 0.011               | 0.100  |
| P45452     | 194    | 0      | 0.072  | —      | 0.053                  | —      | -0.017              | —      |
| P49841     | 214    | 21     | 0.153  | 0.123  | 0.354                  | 0.024  | 0.395               | -0.175 |
| P56658     | 240    | 0      | 0.231  | —      | 0.097                  | —      | 0.095               | —      |
| P98170     | 117    | 49     | 0.046  | 0.167  | 0.015                  | 0.322  | 0.117               | 0.034  |
| P9WKE1     | 137    | 0      | 0.097  | —      | -0.201                 | —      | -0.258              | —      |
| Q07820     | 641    | 19     | 0.274  | 0.181  | 0.246                  | -0.352 | 0.053               | -0.232 |
| Q16790     | 3377   | 172    | -0.089 | -0.124 | -0.073                 | 0.076  | -0.015              | -0.042 |
| Q8N1Q1     | 80     | 258    | -0.405 | -0.129 | 0.072                  | 0.024  | 0.103               | 0.014  |

---

|        |     |     |        |        |       |       |       |       |
|--------|-----|-----|--------|--------|-------|-------|-------|-------|
| Q9ULX7 | 393 | 127 | -0.097 | -0.040 | 0.083 | 0.217 | 0.172 | 0.201 |
|--------|-----|-----|--------|--------|-------|-------|-------|-------|
